# Supplementary material for: DEAD box RNA helicases are pervasive protein kinase interactors and activators
Source: HighWire-hosted journal article supplement (doi:10.1101/gr.278264.123), 2024-06-01
Supplement: Supplemental_Table_S1_.xlsx [file Supplemental_Table_S1_.xlsx]

## Sheet: Description
	List of all proteins expressed in HEK293 cells used as background

## Sheet: HEK293_bg_protein_list2
	Input IDs (mixed)	UniProt Accessions	Symbol	Description
	A0A024R0Y4		TADA2A	Transcriptional adapter
	A0A024R6X1	O00748	CES2	Cocaine esterase
	A0A024RCQ8	Q9UMR5	PPT2	palmitoyl-protein thioesterase 2 [Source:HGNC Symbol;Acc:HGNC:9326]
	A0A067XG54	Q8NB49	ATP11C	ATPase phospholipid transporting 11C [Source:HGNC Symbol;Acc:HGNC:13554]
	A0A075B6I5	P01701	IGLV1-51	Immunoglobulin lambda variable 1-51
	A0A075B747	Q9P281	BAHCC1	BAH and coiled-coil domain-containing protein 1
	A0A075B762	Q6P3W6	NBPF10	Neuroblastoma breakpoint family member 10
	A0A087WSV0	Q9HB09	BCL2L12	BCL2 like 12 [Source:HGNC Symbol;Acc:HGNC:13787]
	A0A087WSW2	P17038	ZNF43	zinc finger protein 43 [Source:HGNC Symbol;Acc:HGNC:13109]
	A0A087WT12
	A0A087WTF0	A2A3K4	PTPDC1	protein tyrosine phosphatase domain containing 1 [Source:HGNC Symbol;Acc:HGNC:30184]
	A0A087WU35		ZNF714	Zinc finger protein 714
	A0A087WUW9
	A0A087WV24	P20711	DDC	dopa decarboxylase [Source:HGNC Symbol;Acc:HGNC:2719]
	A0A087WVF7
	A0A087WVQ6	Q00610	CLTC	clathrin heavy chain [Source:HGNC Symbol;Acc:HGNC:2092]
	A0A087WW58
	A0A087WW96	Q92777	SYN2	Synapsin-2
	A0A087WWB6
	A0A087WWF1
	A0A087WWL5	Q86XI8	ZSWIM9	Uncharacterized protein ZSWIM9
	A0A087WWT2	Q9NPD7	NRN1	neuritin 1 [Source:HGNC Symbol;Acc:HGNC:17972]
	A0A087WWT4		TSPAN10	Tetraspanin-10
	A0A087WX19	Q6IPM2	IQCE	IQ motif containing E [Source:HGNC Symbol;Acc:HGNC:29171]
	A0A087WXA3		SRRM3	Serine/arginine repetitive matrix protein 3
	A0A087WXE3
	A0A087WY96	P31641	SLC6A6	solute carrier family 6 member 6 [Source:HGNC Symbol;Acc:HGNC:11052]
	A0A087WYL5	Q6UXD5	SEZ6L2	seizure related 6 homolog like 2 [Source:HGNC Symbol;Acc:HGNC:30844]
	A0A087WYZ0
	A0A087WZ16	Q0D2I5	IFFO1	intermediate filament family orphan 1 [Source:HGNC Symbol;Acc:HGNC:24970]
	A0A087WZC2	P35680	HNF1B	HNF1 homeobox B [Source:HGNC Symbol;Acc:HGNC:11630]
	A0A087X0B7	Q5SQN1	SNAP47	synaptosome associated protein 47 [Source:HGNC Symbol;Acc:HGNC:30669]
	A0A087X0C8
	A0A087X0F7	Q9H4K1	RIBC2	RIB43A-like with coiled-coils protein 2
	A0A087X0M8	O00533	CHL1	cell adhesion molecule L1 like [Source:HGNC Symbol;Acc:HGNC:1939]
	A0A087X0Q4	A0A087WW87	IGKV2-40	immunoglobulin kappa variable 2-40 [Source:HGNC Symbol;Acc:HGNC:5789]
	A0A087X188
	A0A087X1I8	Q7Z3E5	ARMC9	LisH domain-containing protein ARMC9
	A0A087X1N7
	A0A087X1Q5	O14512	SOCS7	suppressor of cytokine signaling 7 [Source:HGNC Symbol;Acc:HGNC:29846]
	A0A087X2F1	Q16670	ZSCAN26	zinc finger and SCAN domain containing 26 [Source:HGNC Symbol;Acc:HGNC:12978]
	A0A088AWM3	Q8IV33	KIAA0825	Uncharacterized protein KIAA0825
	A0A088AWN2	Q8TBZ3	WDR20	WD repeat domain 20 [Source:HGNC Symbol;Acc:HGNC:19667]
	A0A096LP30	Q8NDA2	HMCN2	Hemicentin-2
	A0A0A0MP75	Q9UJW8	ZNF180	zinc finger protein 180 [Source:HGNC Symbol;Acc:HGNC:12970]
	A0A0A0MQS0	A8MW92	PHF20L1	PHD finger protein 20 like 1 [Source:HGNC Symbol;Acc:HGNC:24280]
	A0A0A0MQS2	Q8N2M8	CLASRP	CLK4 associating serine/arginine rich protein [Source:HGNC Symbol;Acc:HGNC:17731]
	A0A0A0MQT0	P09455	RBP1	retinol binding protein 1 [Source:HGNC Symbol;Acc:HGNC:9919]
	A0A0A0MQW8	Q8N6U8	GPR161	G protein-coupled receptor 161 [Source:HGNC Symbol;Acc:HGNC:23694]
	A0A0A0MRB5	Q8WXG6	MADD	MAP kinase activating death domain [Source:HGNC Symbol;Acc:HGNC:6766]
	A0A0A0MRH7	Q02962	PAX2	paired box 2 [Source:HGNC Symbol;Acc:HGNC:8616]
	A0A0A0MRI7	Q9H2C2	ARV1	ARV1 homolog, fatty acid homeostasis modulator [Source:HGNC Symbol;Acc:HGNC:29561]
	A0A0A0MRT5	Q9UBC1	NFKBIL1	NFKB inhibitor like 1 [Source:HGNC Symbol;Acc:HGNC:7800]
	A0A0A0MRU0	Q14168	MPP2	membrane palmitoylated protein 2 [Source:HGNC Symbol;Acc:HGNC:7220]
	A0A0A0MS41
	A0A0A0MS56	P28332	ADH6	Alcohol dehydrogenase 6
	A0A0A0MS70
	A0A0A0MSE9	Q96CS7	PLEKHB2	pleckstrin homology domain containing B2 [Source:HGNC Symbol;Acc:HGNC:19236]
	A0A0A0MSK4	Q86YR5	GPSM1	G protein signaling modulator 1 [Source:HGNC Symbol;Acc:HGNC:17858]
	A0A0A0MSP0
	A0A0A0MSQ7	P30988	CALCR	calcitonin receptor [Source:HGNC Symbol;Acc:HGNC:1440]
	A0A0A0MSQ8
	A0A0A0MT18
	A0A0A0MTC0	Q96LW4	PRIMPOL	DNA-directed primase/polymerase protein
	A0A0A0MTC7	Q16363	LAMA4	laminin subunit alpha 4 [Source:HGNC Symbol;Acc:HGNC:6484]
	A0A0A0MTK8	P20823	HNF1A	HNF1 homeobox A [Source:HGNC Symbol;Acc:HGNC:11621]
	A0A0A0MTQ6	P01615	IGKV2D-28	Immunoglobulin kappa variable 2D-28
	A0A0A0MTS7	Q8WZ42	TTN	titin [Source:HGNC Symbol;Acc:HGNC:12403]
	A0A0A6YY96	P48200	IREB2	Iron-responsive element-binding protein 2
	A0A0A6YYH1		C15orf38-AP3S2	Arpin
	A0A0A6YYH4	Q9Y6Q2	STON1	Stonin-1
	A0A0A6YYJ4	Q07654	TFF3	Trefoil factor 3
	A0A0A6YYJ8		LUC7L2	Putative RNA-binding protein Luc7-like 2
	A0A0A6YYK5			Uncharacterized protein
	A0A0B4J1Z8	Q9H1A7	POLR2J3	RNA polymerase II subunit J3 [Source:HGNC Symbol;Acc:HGNC:33853]
	A0A0B4J220	E9PRG8	C11orf98	Uncharacterized protein C11orf98
	A0A0B4J270	Q9H2X8	IFI27L2	interferon alpha inducible protein 27 like 2 [Source:HGNC Symbol;Acc:HGNC:19753]
	A0A0B4J2A0			FGGY_N domain-containing protein
	A0A0B4J2A2	A0A0B4J2A2	PPIAL4C	peptidylprolyl isomerase A like 4C [Source:HGNC Symbol;Acc:HGNC:33995]
	A0A0B4J2E8
	A0A0B4J2G0	Q9UII5	ZNF107	zinc finger protein 107 [Source:HGNC Symbol;Acc:HGNC:12887]
	A0A0C4DFL7	Q16850	CYP51A1	cytochrome P450 family 51 subfamily A member 1 [Source:HGNC Symbol;Acc:HGNC:2649]
	A0A0C4DFN1	Q8IWA4	MFN1	Mitofusin-1
	A0A0C4DFP6	Q9NQ79	CRTAC1	cartilage acidic protein 1 [Source:HGNC Symbol;Acc:HGNC:14882]
	A0A0C4DFT9	Q9P202	WHRN	Whirlin
	A0A0C4DFU3		RSPH3	Radial spoke head protein 3 homolog
	A0A0C4DFX3	Q9Y6C2	EMILIN1	EMILIN-1
	A0A0C4DFY5	Q9NQ84	GPRC5C	G protein-coupled receptor class C group 5 member C [Source:HGNC Symbol;Acc:HGNC:13309]
	A0A0C4DFZ2	P15289	ARSA	arylsulfatase A [Source:HGNC Symbol;Acc:HGNC:713]
	A0A0C4DG42	Q8IZ26	ZNF34	zinc finger protein 34 [Source:HGNC Symbol;Acc:HGNC:13098]
	A0A0C4DG86	Q9NX95	SYBU	syntabulin [Source:HGNC Symbol;Acc:HGNC:26011]
	A0A0C4DG91	O75414	NME6	NME/NM23 nucleoside diphosphate kinase 6 [Source:HGNC Symbol;Acc:HGNC:20567]
	A0A0C4DGC6	Q9BZM1	PLA2G12A	phospholipase A2 group XIIA [Source:HGNC Symbol;Acc:HGNC:18554]
	A0A0C4DGJ7	Q8WUH1	CHURC1	churchill domain containing 1 [Source:HGNC Symbol;Acc:HGNC:20099]
	A0A0C4DGJ8
	A0A0C4DGP2	Q86Y91	KIF18B	Kinesin-like protein KIF18B
	A0A0C4DH50
	A0A0C4DH65	A5PL33	KRBA1	KRAB-A domain containing 1 [Source:HGNC Symbol;Acc:HGNC:22228]
	A0A0D9SEI0	Q9P0P8	MTRES1	mitochondrial transcription rescue factor 1 [Source:HGNC Symbol;Acc:HGNC:17971]
	A0A0D9SEN7	Q13950	RUNX2	RUNX family transcription factor 2 [Source:HGNC Symbol;Acc:HGNC:10472]
	A0A0D9SEX9	Q8NBF1	GLIS1	GLIS family zinc finger 1 [Source:HGNC Symbol;Acc:HGNC:29525]
	A0A0G2JHL1	O95872	GPANK1	G-patch domain and ankyrin repeats 1 [Source:HGNC Symbol;Acc:HGNC:13920]
	A0A0G2JIF2	P04439	HLA-A	major histocompatibility complex, class I, A [Source:HGNC Symbol;Acc:HGNC:4931]
	A0A0G2JJ26	Q9H633	RPP21	ribonuclease P/MRP subunit p21 [Source:HGNC Symbol;Acc:HGNC:21300]
	A0A0G2JMB2	P01877	IGHA2	immunoglobulin heavy constant alpha 2 (A2m marker) [Source:HGNC Symbol;Acc:HGNC:5479]
	A0A0G2JMG9	Q6ZN08	ZNF66	zinc finger protein 66 [Source:HGNC Symbol;Acc:HGNC:13135]
	A0A0G2JMP8		TMC4	Transmembrane channel-like protein
	A0A0G2JNC7	Q13075	NAIP	NLR family apoptosis inhibitory protein [Source:HGNC Symbol;Acc:HGNC:7634]
	A0A0G2JNF2
	A0A0G2JNT7		KANSL1	KAT8 regulatory NSL complex subunit 1
	A0A0G2JNW8
	A0A0J9YWM3	Q96BI1	SLC22A18	solute carrier family 22 member 18 [Source:HGNC Symbol;Acc:HGNC:10964]
	A0A0J9YY34	Q5HYW2	NHSL2	NHS-like protein 2
	A0AUZ9	A0AUZ9	KANSL1L	KAT8 regulatory NSL complex subunit 1 like [Source:HGNC Symbol;Acc:HGNC:26310]
	A0AV02	A0AV02	SLC12A8	solute carrier family 12 member 8 [Source:HGNC Symbol;Acc:HGNC:15595]
	A0AV96	A0AV96	RBM47	RNA binding motif protein 47 [Source:HGNC Symbol;Acc:HGNC:30358]
	A0AVF1	A0AVF1	TTC26	tetratricopeptide repeat domain 26 [Source:HGNC Symbol;Acc:HGNC:21882]
	A0AVI4	A0AVI4	TMEM129	transmembrane protein 129, E3 ubiquitin ligase [Source:HGNC Symbol;Acc:HGNC:25137]
	A0AVK6	A0AVK6	E2F8	E2F transcription factor 8 [Source:HGNC Symbol;Acc:HGNC:24727]
	A0AVT1	A0AVT1	UBA6	ubiquitin like modifier activating enzyme 6 [Source:HGNC Symbol;Acc:HGNC:25581]
	A0FGR8	A0FGR8	ESYT2	extended synaptotagmin 2 [Source:HGNC Symbol;Acc:HGNC:22211]
	A0JLT2	A0JLT2	MED19	mediator complex subunit 19 [Source:HGNC Symbol;Acc:HGNC:29600]
	A0JNW5	A0JNW5	UHRF1BP1L	UHRF1 binding protein 1 like [Source:HGNC Symbol;Acc:HGNC:29102]
	A0MZ66	A0MZ66	SHTN1	shootin 1 [Source:HGNC Symbol;Acc:HGNC:29319]
	A0PJW6	A0PJW6	TMEM223	transmembrane protein 223 [Source:HGNC Symbol;Acc:HGNC:28464]
	A0PJZ3	A0PJZ3	GXYLT2	glucoside xylosyltransferase 2 [Source:HGNC Symbol;Acc:HGNC:33383]
	A0PK00	A0PK00	TMEM120B	transmembrane protein 120B [Source:HGNC Symbol;Acc:HGNC:32008]
	A1A4S6	A1A4S6	ARHGAP10	Rho GTPase activating protein 10 [Source:HGNC Symbol;Acc:HGNC:26099]
	A1A5B4	A1A5B4	ANO9	anoctamin 9 [Source:HGNC Symbol;Acc:HGNC:20679]
	A1A5C7	A1A5C7	SLC22A23	solute carrier family 22 member 23 [Source:HGNC Symbol;Acc:HGNC:21106]
	A1A5D9	A1A5D9	BICDL2	BICD family like cargo adaptor 2 [Source:HGNC Symbol;Acc:HGNC:33584]
	A1IGU5	A1IGU5	ARHGEF37	Rho guanine nucleotide exchange factor 37 [Source:HGNC Symbol;Acc:HGNC:34430]
	A1KXE4	A1KXE4	FAM168B	family with sequence similarity 168 member B [Source:HGNC Symbol;Acc:HGNC:27016]
	A1L020	A1L020	MEX3A	mex-3 RNA binding family member A [Source:HGNC Symbol;Acc:HGNC:33482]
	A1L0T0	A1L0T0	ILVBL	ilvB acetolactate synthase like [Source:HGNC Symbol;Acc:HGNC:6041]
	A1L170	A1L170	C1orf226	chromosome 1 open reading frame 226 [Source:HGNC Symbol;Acc:HGNC:34351]
	A1L188	A1L188	NDUFAF8	NADH:ubiquinone oxidoreductase complex assembly factor 8 [Source:HGNC Symbol;Acc:HGNC:33551]
	A1L390	A1L390	PLEKHG3	pleckstrin homology and RhoGEF domain containing G3 [Source:HGNC Symbol;Acc:HGNC:20364]
	A1L3X0	A1L3X0	ELOVL7	ELOVL fatty acid elongase 7 [Source:HGNC Symbol;Acc:HGNC:26292]
	A1L4H1	A1L4H1	SSC5D	scavenger receptor cysteine rich family member with 5 domains [Source:HGNC Symbol;Acc:HGNC:26641]
	A1X283	A1X283	SH3PXD2B	SH3 and PX domains 2B [Source:HGNC Symbol;Acc:HGNC:29242]
	A1XBS5	A1XBS5	CIBAR1	CBY1 interacting BAR domain containing 1 [Source:HGNC Symbol;Acc:HGNC:30452]
	A1Z1Q3	A1Z1Q3	MACROD2	mono-ADP ribosylhydrolase 2 [Source:HGNC Symbol;Acc:HGNC:16126]
	A2A288	A2A288	ZC3H12D	zinc finger CCCH-type containing 12D [Source:HGNC Symbol;Acc:HGNC:21175]
	A2A2Y4	A2A2Y4	FRMD3	FERM domain containing 3 [Source:HGNC Symbol;Acc:HGNC:24125]
	A2AB90	O15533	TAPBP	TAP binding protein [Source:HGNC Symbol;Acc:HGNC:11566]
	A2AJT9	A2AJT9	BCLAF3	BCLAF1 and THRAP3 family member 3 [Source:HGNC Symbol;Acc:HGNC:27413]
	A2NJV5	A2NJV5	IGKV2-29	Immunoglobulin kappa variable 2-29
	A2RRD8	A2RRD8	ZNF320	zinc finger protein 320 [Source:HGNC Symbol;Acc:HGNC:13842]
	A2RRP1	A2RRP1	NBAS	NBAS subunit of NRZ tethering complex [Source:HGNC Symbol;Acc:HGNC:15625]
	A2RTX5	A2RTX5	TARS3	threonyl-tRNA synthetase 3 [Source:HGNC Symbol;Acc:HGNC:24728]
	A2RU49	A2RU49	HYKK	hydroxylysine kinase [Source:HGNC Symbol;Acc:HGNC:34403]
	A2RU67	A2RU67	FAM234B	family with sequence similarity 234 member B [Source:HGNC Symbol;Acc:HGNC:29288]
	A2RUB1	A2RUB1	MEIOC	meiosis specific with coiled-coil domain [Source:HGNC Symbol;Acc:HGNC:26670]
	A2RUB6	A2RUB6	CCDC66	coiled-coil domain containing 66 [Source:HGNC Symbol;Acc:HGNC:27709]
	A2RUC4	A2RUC4	TYW5	tRNA-yW synthesizing protein 5 [Source:HGNC Symbol;Acc:HGNC:26754]
	A2VDF0	A2VDF0	FUOM	fucose mutarotase [Source:HGNC Symbol;Acc:HGNC:24733]
	A2VDJ0	A2VDJ0	TMEM131L	transmembrane 131 like [Source:HGNC Symbol;Acc:HGNC:29146]
	A3KMH1	A3KMH1	VWA8	von Willebrand factor A domain containing 8 [Source:HGNC Symbol;Acc:HGNC:29071]
	A3KN83	A3KN83	SBNO1	strawberry notch homolog 1 [Source:HGNC Symbol;Acc:HGNC:22973]
	A4D126	A4D126	CRPPA	CDP-L-ribitol pyrophosphorylase A [Source:HGNC Symbol;Acc:HGNC:37276]
	A4D161	A4D161	FAM221A	family with sequence similarity 221 member A [Source:HGNC Symbol;Acc:HGNC:27977]
	A4D1E9	A4D1E9	GTPBP10	GTP binding protein 10 [Source:HGNC Symbol;Acc:HGNC:25106]
	A4D1P6	A4D1P6	WDR91	WD repeat domain 91 [Source:HGNC Symbol;Acc:HGNC:24997]
	A4D1S0	A4D1S0	KLRG2	killer cell lectin like receptor G2 [Source:HGNC Symbol;Acc:HGNC:24778]
	A4D1S5	A4D1S5	RAB19	RAB19, member RAS oncogene family [Source:HGNC Symbol;Acc:HGNC:19982]
	A4D1U4	A4D1U4	DENND11	DENN domain containing 11 [Source:HGNC Symbol;Acc:HGNC:29472]
	A4D2B0	A4D2B0	MBLAC1	metallo-beta-lactamase domain containing 1 [Source:HGNC Symbol;Acc:HGNC:22180]
	A4D2H0	A4D2H0	CTAGE15	CTAGE family member 15 [Source:HGNC Symbol;Acc:HGNC:37295]
	A4D2P6	A4D2P6	GRID2IP	Grid2 interacting protein [Source:HGNC Symbol;Acc:HGNC:18464]
	A4FU01	A4FU01	MTMR11	myotubularin related protein 11 [Source:HGNC Symbol;Acc:HGNC:24307]
	A4FU49	A4FU49	SH3D21	SH3 domain containing 21 [Source:HGNC Symbol;Acc:HGNC:26236]
	A5A3E0	A5A3E0	POTEF	POTE ankyrin domain family member F [Source:HGNC Symbol;Acc:HGNC:33905]
	A5D8V6	A5D8V6	VPS37C	VPS37C subunit of ESCRT-I [Source:HGNC Symbol;Acc:HGNC:26097]
	A5PLL7	A5PLL7	PEDS1	plasmanylethanolamine desaturase 1 [Source:HGNC Symbol;Acc:HGNC:16735]
	A5PLN9	A5PLN9	TRAPPC13	trafficking protein particle complex subunit 13 [Source:HGNC Symbol;Acc:HGNC:25828]
	A5YKK6	A5YKK6	CNOT1	CCR4-NOT transcription complex subunit 1 [Source:HGNC Symbol;Acc:HGNC:7877]
	A5YM69	A5YM69	ARHGEF35	Rho guanine nucleotide exchange factor 35 [Source:HGNC Symbol;Acc:HGNC:33846]
	A6H8Y1	A6H8Y1	BDP1	B double prime 1, subunit of RNA polymerase III transcription initiation factor IIIB [Source:HGNC Symbol;Acc:HGNC:13652]
	A6NC98	A6NC98	CCDC88B	coiled-coil domain containing 88B [Source:HGNC Symbol;Acc:HGNC:26757]
	A6NCE0	A6NCE0
	A6NCN2	A6NCN2	KRT87P	Putative keratin-87 protein
	A6NCS6	A6NCS6	C2orf72	chromosome 2 open reading frame 72 [Source:HGNC Symbol;Acc:HGNC:27418]
	A6ND36	A6ND36	FAM83G	family with sequence similarity 83 member G [Source:HGNC Symbol;Acc:HGNC:32554]
	A6NDB9	A6NDB9	PALM3	paralemmin 3 [Source:HGNC Symbol;Acc:HGNC:33274]
	A6NDG6	A6NDG6	PGP	phosphoglycolate phosphatase [Source:HGNC Symbol;Acc:HGNC:8909]
	A6NDN3	A6NDN3	GOLGA6B	golgin A6 family member B [Source:HGNC Symbol;Acc:HGNC:32205]
	A6NDU8	A6NDU8	C5orf51	chromosome 5 open reading frame 51 [Source:HGNC Symbol;Acc:HGNC:27750]
	A6NED2	A6NED2	RCCD1	RCC1 domain containing 1 [Source:HGNC Symbol;Acc:HGNC:30457]
	A6NEL2	A6NEL2	SOWAHB	sosondowah ankyrin repeat domain family member B [Source:HGNC Symbol;Acc:HGNC:32958]
	A6NFI3	A6NFI3	ZNF316	zinc finger protein 316 [Source:HGNC Symbol;Acc:HGNC:13843]
	A6NFN3	A6NFN3	RBFOX3	RNA binding fox-1 homolog 3 [Source:HGNC Symbol;Acc:HGNC:27097]
	A6NFQ2	A6NFQ2	TCAF2	TRPM8 channel associated factor 2 [Source:HGNC Symbol;Acc:HGNC:26878]
	A6NFY4	A6NFY4	NEMP2	nuclear envelope integral membrane protein 2 [Source:HGNC Symbol;Acc:HGNC:33700]
	A6NFY7	A6NFY7	SDHAF1	succinate dehydrogenase complex assembly factor 1 [Source:HGNC Symbol;Acc:HGNC:33867]
	A6NGA6	Q9Y5S8	NOX1	NADPH oxidase 1 [Source:HGNC Symbol;Acc:HGNC:7889]
	A6NGB9	A6NGB9	WIPF3	WAS/WASL interacting protein family member 3 [Source:HGNC Symbol;Acc:HGNC:22004]
	A6NGC4	A6NGC4	TLCD2	TLC domain containing 2 [Source:HGNC Symbol;Acc:HGNC:33522]
	A6NGN9	A6NGN9	IGLON5	IgLON family member 5 [Source:HGNC Symbol;Acc:HGNC:34550]
	A6NGR9	A6NGR9	MROH6	maestro heat like repeat family member 6 [Source:HGNC Symbol;Acc:HGNC:27814]
	A6NHL2	A6NHL2	TUBAL3	tubulin alpha like 3 [Source:HGNC Symbol;Acc:HGNC:23534]
	A6NHQ2	A6NHQ2	FBLL1	fibrillarin like 1 [Source:HGNC Symbol;Acc:HGNC:35458]
	A6NHQ4	A6NHQ4	EPOP	elongin BC and polycomb repressive complex 2 associated protein [Source:HGNC Symbol;Acc:HGNC:34493]
	A6NHR9	A6NHR9	SMCHD1	structural maintenance of chromosomes flexible hinge domain containing 1 [Source:HGNC Symbol;Acc:HGNC:29090]
	A6NHT5	A6NHT5	HMX3	H6 family homeobox 3 [Source:HGNC Symbol;Acc:HGNC:5019]
	A6NHX0	A6NHX0	CASTOR2	cytosolic arginine sensor for mTORC1 subunit 2 [Source:HGNC Symbol;Acc:HGNC:37073]
	A6NI28	A6NI28	ARHGAP42	Rho GTPase activating protein 42 [Source:HGNC Symbol;Acc:HGNC:26545]
	A6NI79	A6NI79	CCDC69	coiled-coil domain containing 69 [Source:HGNC Symbol;Acc:HGNC:24487]
	A6NIH7	A6NIH7	UNC119B	unc-119 lipid binding chaperone B [Source:HGNC Symbol;Acc:HGNC:16488]
	A6NJ78	A6NJ78	METTL15	methyltransferase like 15 [Source:HGNC Symbol;Acc:HGNC:26606]
	A6NJG2	A6NJG2	SOWAHD	sosondowah ankyrin repeat domain family member D [Source:HGNC Symbol;Acc:HGNC:32960]
	A6NJT0	A6NJT0	UNCX	UNC homeobox [Source:HGNC Symbol;Acc:HGNC:33194]
	A6NK44	A6NK44	GLOD5	glyoxalase domain containing 5 [Source:HGNC Symbol;Acc:HGNC:33358]
	A6NK58	A6NK58	LIPT2	lipoyl(octanoyl) transferase 2 [Source:HGNC Symbol;Acc:HGNC:37216]
	A6NKB5	A6NKB5	PCNX2	pecanex 2 [Source:HGNC Symbol;Acc:HGNC:8736]
	A6NKC9	A6NKC9	SH2D7	SH2 domain containing 7 [Source:HGNC Symbol;Acc:HGNC:34549]
	A6NKD9	A6NKD9	CCDC85C	coiled-coil domain containing 85C [Source:HGNC Symbol;Acc:HGNC:35459]
	A6NKF2	A6NKF2	ARID3C	AT-rich interaction domain 3C [Source:HGNC Symbol;Acc:HGNC:21209]
	A6NKG5	A6NKG5	RTL1	retrotransposon Gag like 1 [Source:HGNC Symbol;Acc:HGNC:14665]
	A6NKW6	A6NKW6	SHISAL2B	shisa like 2B [Source:HGNC Symbol;Acc:HGNC:34236]
	A6NM28	A6NM28	ZFP92	ZFP92 zinc finger protein [Source:HGNC Symbol;Acc:HGNC:12865]
	A6NMZ7	A6NMZ7	COL6A6	collagen type VI alpha 6 chain [Source:HGNC Symbol;Acc:HGNC:27023]
	A6NNL5	A6NNL5	C15orf61	chromosome 15 open reading frame 61 [Source:HGNC Symbol;Acc:HGNC:34453]
	A6NNY8	A6NNY8	USP27X	ubiquitin specific peptidase 27 X-linked [Source:HGNC Symbol;Acc:HGNC:13486]
	A6QL63	A6QL63	BTBD11	BTB domain containing 11 [Source:HGNC Symbol;Acc:HGNC:23844]
	A6QL64	A6QL64	ANKRD36	ankyrin repeat domain 36 [Source:HGNC Symbol;Acc:HGNC:24079]
	A6ZKI3	A6ZKI3	RTL8C	retrotransposon Gag like 8C [Source:HGNC Symbol;Acc:HGNC:2569]
	A7E294	A7E294
	A7E2V4	A7E2V4	ZSWIM8	zinc finger SWIM-type containing 8 [Source:HGNC Symbol;Acc:HGNC:23528]
	A7KAX9	A7KAX9	ARHGAP32	Rho GTPase activating protein 32 [Source:HGNC Symbol;Acc:HGNC:17399]
	A7MBM2	A7MBM2	DISP2	dispatched RND transporter family member 2 [Source:HGNC Symbol;Acc:HGNC:19712]
	A7MCY6	A7MCY6	TBKBP1	TBK1 binding protein 1 [Source:HGNC Symbol;Acc:HGNC:30140]
	A7MD48	A7MD48	SRRM4	serine/arginine repetitive matrix 4 [Source:HGNC Symbol;Acc:HGNC:29389]
	A7XYQ1	A7XYQ1	SOBP	sine oculis binding protein homolog [Source:HGNC Symbol;Acc:HGNC:29256]
	A8CG34	A8CG34	POM121C	POM121 transmembrane nucleoporin C [Source:HGNC Symbol;Acc:HGNC:34005]
	A8K0R7	A8K0R7	ZNF839	zinc finger protein 839 [Source:HGNC Symbol;Acc:HGNC:20345]
	A8K2U0	A8K2U0	A2ML1	alpha-2-macroglobulin like 1 [Source:HGNC Symbol;Acc:HGNC:23336]
	A8K727	A8K727	PLEKHA2	Pleckstrin homology domain-containing family A member 2
	A8K855	A8K855	EFCAB7	EF-hand calcium binding domain 7 [Source:HGNC Symbol;Acc:HGNC:29379]
	A8K8P3	A8K8P3	SFI1	SFI1 centrin binding protein [Source:HGNC Symbol;Acc:HGNC:29064]
	A8K8V0	A8K8V0	ZNF785	zinc finger protein 785 [Source:HGNC Symbol;Acc:HGNC:26496]
	A8K979	A8K979	ERI2	ERI1 exoribonuclease family member 2 [Source:HGNC Symbol;Acc:HGNC:30541]
	A8MPS7	A8MPS7	YDJC	YdjC chitooligosaccharide deacetylase homolog [Source:HGNC Symbol;Acc:HGNC:27158]
	A8MQ03	A8MQ03	CYSRT1	cysteine rich tail 1 [Source:HGNC Symbol;Acc:HGNC:30529]
	A8MQ14	A8MQ14	ZNF850	zinc finger protein 850 [Source:HGNC Symbol;Acc:HGNC:27994]
	A8MT69	A8MT69	CENPX	centromere protein X [Source:HGNC Symbol;Acc:HGNC:11422]
	A8MTJ6	A8MTJ6	FOXI3	forkhead box I3 [Source:HGNC Symbol;Acc:HGNC:35123]
	A8MTT3	A8MTT3	CEBPZOS	CEBPZ opposite strand [Source:HGNC Symbol;Acc:HGNC:49288]
	A8MTY0	A8MTY0	ZNF724	zinc finger protein 724 [Source:HGNC Symbol;Acc:HGNC:32460]
	A8MTZ0	A8MTZ0	BBIP1	BBSome interacting protein 1 [Source:HGNC Symbol;Acc:HGNC:28093]
	A8MU93	A8MU93	C17orf100	chromosome 17 open reading frame 100 [Source:HGNC Symbol;Acc:HGNC:34494]
	A8MVW0	A8MVW0	FAM171A2	family with sequence similarity 171 member A2 [Source:HGNC Symbol;Acc:HGNC:30480]
	A8MW78	Q13588	GRAP	GRB2 related adaptor protein [Source:HGNC Symbol;Acc:HGNC:4562]
	A8MWY0	A8MWY0	ELAPOR2	endosome-lysosome associated apoptosis and autophagy regulator family member 2 [Source:HGNC Symbol;Acc:HGNC:21945]
	A8MX07	Q96LK0	CEP19	centrosomal protein 19 [Source:HGNC Symbol;Acc:HGNC:28209]
	A8MXQ1	P53801	PTTG1IP	PTTG1 interacting protein [Source:HGNC Symbol;Acc:HGNC:13524]
	A8MXV4	A8MXV4	NUDT19	nudix hydrolase 19 [Source:HGNC Symbol;Acc:HGNC:32036]
	A9UHW6	A9UHW6	MIF4GD	MIF4G domain containing [Source:HGNC Symbol;Acc:HGNC:24030]
	A9YTQ3	A9YTQ3	AHRR	Aryl hydrocarbon receptor repressor
	B0I1T2	B0I1T2	MYO1G	myosin IG [Source:HGNC Symbol;Acc:HGNC:13880]
	B0YJ81	B0YJ81	HACD1	3-hydroxyacyl-CoA dehydratase 1 [Source:HGNC Symbol;Acc:HGNC:9639]
	B1AH87	B1AH88	TSPO	translocator protein [Source:HGNC Symbol;Acc:HGNC:1158]
	B1AJZ9	B1AJZ9	FHAD1	forkhead associated phosphopeptide binding domain 1 [Source:HGNC Symbol;Acc:HGNC:29408]
	B1AK53	B1AK53	ESPN	espin [Source:HGNC Symbol;Acc:HGNC:13281]
	B1AKY9	P50993	ATP1A2	ATPase Na+/K+ transporting subunit alpha 2 [Source:HGNC Symbol;Acc:HGNC:800]
	B1ALU3	O95490	ADGRL2	adhesion G protein-coupled receptor L2 [Source:HGNC Symbol;Acc:HGNC:18582]
	B1AP22	P49810	PSEN2	presenilin 2 [Source:HGNC Symbol;Acc:HGNC:9509]
	B1APY9	P26378	ELAVL4	ELAV like RNA binding protein 4 [Source:HGNC Symbol;Acc:HGNC:3315]
	B1B0D4	Q86TH1	ADAMTSL2	ADAMTS like 2 [Source:HGNC Symbol;Acc:HGNC:14631]
	B2RTY4	B2RTY4	MYO9A	myosin IXA [Source:HGNC Symbol;Acc:HGNC:7608]
	B2RUZ4	B2RUZ4	SMIM1	small integral membrane protein 1 (Vel blood group) [Source:HGNC Symbol;Acc:HGNC:44204]
	B3EWG6	B3EWG6	FAM25G	family with sequence similarity 25 member G [Source:HGNC Symbol;Acc:HGNC:23590]
	B3KW44	Q9H825	METTL8	methyltransferase 8, methylcytidine [Source:HGNC Symbol;Acc:HGNC:25856]
	B4DJL6	Q96SY0	INTS14	integrator complex subunit 14 [Source:HGNC Symbol;Acc:HGNC:25372]
	B4DL54	B4DL54	CHURC1-FNTB	Protein farnesyltransferase subunit beta
	B4DTS2	Q9BZL6	PRKD2	Serine/threonine-protein kinase D2
	B4DWG0	O95199	RCBTB2	RCC1 and BTB domain containing protein 2 [Source:HGNC Symbol;Acc:HGNC:1914]
	B4DX44	B4DX44	ZNF736	zinc finger protein 736 [Source:HGNC Symbol;Acc:HGNC:32467]
	B4DXG7	B4DXG7		cDNA FLJ57652, highly similar to Ephrin-A3
	B4DZ31	Q9NWS1	PARPBP	PARP1 binding protein [Source:HGNC Symbol;Acc:HGNC:26074]
	B4E171	B4E171		cDNA FLJ59144, highly similar to Tetraspanin-7
	B4E1Z4	B4E1Z4		Complement factor B
	B4E3H0	B4E3H0	ARL16	ADP-ribosylation factor-like protein 16
	B5MBW9	Q8WYQ3	CHCHD10	coiled-coil-helix-coiled-coil-helix domain containing 10 [Source:HGNC Symbol;Acc:HGNC:15559]
	B5MCU0	Q9Y2K5	R3HDM2	R3H domain containing 2 [Source:HGNC Symbol;Acc:HGNC:29167]
	B5MCZ0	P38484	IFNGR2	interferon gamma receptor 2 [Source:HGNC Symbol;Acc:HGNC:5440]
	B5MD23	O75954	TSPAN9	tetraspanin 9 [Source:HGNC Symbol;Acc:HGNC:21640]
	B7WPL0	Q9NVN3	RIC8B	RIC8 guanine nucleotide exchange factor B [Source:HGNC Symbol;Acc:HGNC:25555]
	B7WPL9	Q6PFW1	PPIP5K1	diphosphoinositol pentakisphosphate kinase 1 [Source:HGNC Symbol;Acc:HGNC:29023]
	B7ZAQ6	B7ZAQ6	GPR89A	G protein-coupled receptor 89A [Source:HGNC Symbol;Acc:HGNC:31984]
	B7ZLI8	P49842	STK19	serine/threonine kinase 19 [Source:HGNC Symbol;Acc:HGNC:11398]
	B7ZM87	O75044	SRGAP2	SLIT-ROBO Rho GTPase activating protein 2 [Source:HGNC Symbol;Acc:HGNC:19751]
	B9EJG8	B9EJG8	TMEM150C	transmembrane protein 150C [Source:HGNC Symbol;Acc:HGNC:37263]
	C9J240	Q6U841	SLC4A10	solute carrier family 4 member 10 [Source:HGNC Symbol;Acc:HGNC:13811]
	C9J798	C9J798	RASA4B	RAS p21 protein activator 4B [Source:HGNC Symbol;Acc:HGNC:35202]
	C9JH25	C9JH25	PRRT4	proline rich transmembrane protein 4 [Source:HGNC Symbol;Acc:HGNC:37280]
	C9JLR9	C9JLR9	ZFTA	zinc finger translocation associated [Source:HGNC Symbol;Acc:HGNC:28449]
	C9JLW8	C9JLW8	MCRIP1	MAPK regulated corepressor interacting protein 1 [Source:HGNC Symbol;Acc:HGNC:28007]
	C9JTQ0	C9JTQ0	ANKRD63	ankyrin repeat domain 63 [Source:HGNC Symbol;Acc:HGNC:40027]
	C9JY04	Q9BU79	TMEM243	transmembrane protein 243 [Source:HGNC Symbol;Acc:HGNC:21707]
	C9K0J5	Q70E73	RAPH1	Ras association (RalGDS/AF-6) and pleckstrin homology domains 1 [Source:HGNC Symbol;Acc:HGNC:14436]
	D2IYK5	Q9Y242	TCF19	transcription factor 19 [Source:HGNC Symbol;Acc:HGNC:11629]
	D3DWC4	Q86VZ5	SGMS1	Phosphatidylcholine:ceramide cholinephosphotransferase 1
	D3YTE6	D3YTE6
	D6R9S8	Q9NY35	CLDND1	claudin domain containing 1 [Source:HGNC Symbol;Acc:HGNC:1322]
	D6RAR2	A8MSI8	LYRM9	LYR motif containing 9 [Source:HGNC Symbol;Acc:HGNC:27314]
	D6RCM7	Q8TEZ7	PAQR8	progestin and adipoQ receptor family member 8 [Source:HGNC Symbol;Acc:HGNC:15708]
	D6RDH5	O14610	GNGT2	G protein subunit gamma transducin 2 [Source:HGNC Symbol;Acc:HGNC:4412]
	D6RDX3	Q9H0Y0	ATG10	autophagy related 10 [Source:HGNC Symbol;Acc:HGNC:20315]
	D6RG30	Q2TB18	ASTE1	asteroid homolog 1 [Source:HGNC Symbol;Acc:HGNC:25021]
	D6RGH6	D6RGH6	MCIDAS	multiciliate differentiation and DNA synthesis associated cell cycle protein [Source:HGNC Symbol;Acc:HGNC:40050]
	E0CX11	E0CX11	STMP1	short transmembrane mitochondrial protein 1 [Source:HGNC Symbol;Acc:HGNC:41909]
	E5RFE0	Q9UQ10	DHDH	dihydrodiol dehydrogenase [Source:HGNC Symbol;Acc:HGNC:17887]
	E5RFK5	P24863	CCNC	cyclin C [Source:HGNC Symbol;Acc:HGNC:1581]
	E5RFQ1	Q9UH73	EBF1	EBF transcription factor 1 [Source:HGNC Symbol;Acc:HGNC:3126]
	E5RG44	Q629K1	TRIQK	triple QxxK/R motif containing [Source:HGNC Symbol;Acc:HGNC:27828]
	E5RHQ5	E5RHQ5	NPIPB11	nuclear pore complex interacting protein family member B11 [Source:HGNC Symbol;Acc:HGNC:37453]
	E5RI87	Q86XS8	RNF130	ring finger protein 130 [Source:HGNC Symbol;Acc:HGNC:18280]
	E7EMZ9	O95359	TACC2	transforming acidic coiled-coil containing protein 2 [Source:HGNC Symbol;Acc:HGNC:11523]
	E7EPT6	P01135	TGFA	transforming growth factor alpha [Source:HGNC Symbol;Acc:HGNC:11765]
	E7EQ57	Q03112	MECOM	Histone-lysine N-methyltransferase MECOM
	E7ER45	O43451	MGAM	maltase-glucoamylase [Source:HGNC Symbol;Acc:HGNC:7043]
	E7EUF7	E7EUF7
	E7EVD6	Q9HAR2	ADGRL3	adhesion G protein-coupled receptor L3 [Source:HGNC Symbol;Acc:HGNC:20974]
	E7EWN3	Q9C0A6	SETD5	SET domain containing 5 [Source:HGNC Symbol;Acc:HGNC:25566]
	E9PAV3	E9PAV3	NACA	nascent polypeptide associated complex subunit alpha [Source:HGNC Symbol;Acc:HGNC:7629]
	E9PC62	O95319	CELF2	CUGBP Elav-like family member 2 [Source:HGNC Symbol;Acc:HGNC:2550]
	E9PCN2	Q02153	GUCY1B1	guanylate cyclase 1 soluble subunit beta 1 [Source:HGNC Symbol;Acc:HGNC:4687]
	E9PCW1	O95249	GOSR1	golgi SNAP receptor complex member 1 [Source:HGNC Symbol;Acc:HGNC:4430]
	E9PDK2	Q9H9P5	UNKL	unk like zinc finger [Source:HGNC Symbol;Acc:HGNC:14184]
	E9PEJ6	P98196	ATP11A	ATPase phospholipid transporting 11A [Source:HGNC Symbol;Acc:HGNC:13552]
	E9PF32	A2RUS2	DENND3	DENN domain containing 3 [Source:HGNC Symbol;Acc:HGNC:29134]
	E9PFE2	Q9UHL9	GTF2IRD1	GTF2I repeat domain containing 1 [Source:HGNC Symbol;Acc:HGNC:4661]
	E9PFI2	Q9Y2K9	STXBP5L	syntaxin binding protein 5L [Source:HGNC Symbol;Acc:HGNC:30757]
	E9PGC8	P78559	MAP1A	microtubule associated protein 1A [Source:HGNC Symbol;Acc:HGNC:6835]
	E9PHK0	P05452	CLEC3B	C-type lectin domain family 3 member B [Source:HGNC Symbol;Acc:HGNC:11891]
	E9PHY8	Q8NDA8	MROH1	maestro heat like repeat family member 1 [Source:HGNC Symbol;Acc:HGNC:26958]
	E9PIR9	E9PIR9
	E9PIW2	Q15700	DLG2	discs large MAGUK scaffold protein 2 [Source:HGNC Symbol;Acc:HGNC:2901]
	E9PIX5	Q9NXJ0	MS4A12	membrane spanning 4-domains A12 [Source:HGNC Symbol;Acc:HGNC:13370]
	E9PJD7	Q6ZMK1	CYHR1	cysteine and histidine rich 1 [Source:HGNC Symbol;Acc:HGNC:17806]
	E9PL79	Q96LC7	SIGLEC10	sialic acid binding Ig like lectin 10 [Source:HGNC Symbol;Acc:HGNC:15620]
	E9PLM8	Q8N336	ELMOD1	ELMO domain containing 1 [Source:HGNC Symbol;Acc:HGNC:25334]
	E9PN41	O14817	TSPAN4	tetraspanin 4 [Source:HGNC Symbol;Acc:HGNC:11859]
	E9PQR4	P50607	TUB	TUB bipartite transcription factor [Source:HGNC Symbol;Acc:HGNC:12406]
	E9PR86	Q86YD5	LDLRAD3	low density lipoprotein receptor class A domain containing 3 [Source:HGNC Symbol;Acc:HGNC:27046]
	E9PS15	Q6PI25	CNIH2	cornichon family AMPA receptor auxiliary protein 2 [Source:HGNC Symbol;Acc:HGNC:28744]
	F2Z2J1	Q15349	RPS6KA2	ribosomal protein S6 kinase A2 [Source:HGNC Symbol;Acc:HGNC:10431]
	F5GX28	O94953	KDM4B	lysine demethylase 4B [Source:HGNC Symbol;Acc:HGNC:29136]
	F5H032	Q15937	ZNF79	zinc finger protein 79 [Source:HGNC Symbol;Acc:HGNC:13153]
	F5H0S8	P16520	GNB3	G protein subunit beta 3 [Source:HGNC Symbol;Acc:HGNC:4400]
	F5H148	Q9NYV6	RRN3	RRN3 homolog, RNA polymerase I transcription factor [Source:HGNC Symbol;Acc:HGNC:30346]
	F5H265	P0CG48	UBC	ubiquitin C [Source:HGNC Symbol;Acc:HGNC:12468]
	F5H2N6	Q9HCI6	KIAA1586	KIAA1586 [Source:HGNC Symbol;Acc:HGNC:21360]
	F5H2P0	A1L157	TSPAN11	tetraspanin 11 [Source:HGNC Symbol;Acc:HGNC:30795]
	F5H6C1	O43581	SYT7	Synaptotagmin-7
	F6U3F6	P50539	MXI1	MAX interactor 1, dimerization protein [Source:HGNC Symbol;Acc:HGNC:7534]
	F6WH68	F6WH68
	F6XHT0	F6XHT0
	F8VU11	Q6NWY9	PRPF40B	pre-mRNA processing factor 40 homolog B [Source:HGNC Symbol;Acc:HGNC:25031]
	F8VUD2	Q96HM7	PCED1B	PC-esterase domain containing 1B [Source:HGNC Symbol;Acc:HGNC:28255]
	F8VUJ3	F8VUJ3	POC1B-GALNT4	Polypeptide N-acetylgalactosaminyltransferase
	F8VWE0	Q12999	TSPAN31	tetraspanin 31 [Source:HGNC Symbol;Acc:HGNC:10539]
	F8VWL3	Q96M96	FGD4	FYVE, RhoGEF and PH domain containing 4 [Source:HGNC Symbol;Acc:HGNC:19125]
	F8VX10	Q9H9L4	KANSL2	KAT8 regulatory NSL complex subunit 2 [Source:HGNC Symbol;Acc:HGNC:26024]
	F8W889	Q2M3W8	ZNF181	zinc finger protein 181 [Source:HGNC Symbol;Acc:HGNC:12971]
	F8W9W8	Q92959	SLCO2A1	solute carrier organic anion transporter family member 2A1 [Source:HGNC Symbol;Acc:HGNC:10955]
	F8WC89	F8WC89	SAC3D1	SAC3 domain-containing protein 1
	F8WD64	Q69YW2	STUM	stum, mechanosensory transduction mediator homolog [Source:HGNC Symbol;Acc:HGNC:30491]
	F8WEM8	Q502X0	MORN2	MORN repeat containing 2 [Source:HGNC Symbol;Acc:HGNC:30166]
	G1UD79	Q7Z309	PABIR2	PABIR family member 2 [Source:HGNC Symbol;Acc:HGNC:30490]
	G3V2N3	P54821	PRRX1	paired related homeobox 1 [Source:HGNC Symbol;Acc:HGNC:9142]
	G3V3G9	P40855	PEX19	Peroxisomal biogenesis factor 19
	G3V511	Q14767	LTBP2	latent transforming growth factor beta binding protein 2 [Source:HGNC Symbol;Acc:HGNC:6715]
	G3V599	Q96PC5	MIA2	MIA SH3 domain ER export factor 2 [Source:HGNC Symbol;Acc:HGNC:18432]
	G3XAE9	Q9Y4F4	TOGARAM1	TOG array regulator of axonemal microtubules 1 [Source:HGNC Symbol;Acc:HGNC:19959]
	G3XAG5	P51793	CLCN4	chloride voltage-gated channel 4 [Source:HGNC Symbol;Acc:HGNC:2022]
	G3XAP6	P49747	COMP	cartilage oligomeric matrix protein [Source:HGNC Symbol;Acc:HGNC:2227]
	G5E994	Q5VW38	GPR107	G protein-coupled receptor 107 [Source:HGNC Symbol;Acc:HGNC:17830]
	G5E9A6	P51784	USP11	ubiquitin specific peptidase 11 [Source:HGNC Symbol;Acc:HGNC:12609]
	H0Y8A4	P34925	RYK	receptor like tyrosine kinase [Source:HGNC Symbol;Acc:HGNC:10481]
	H0YAC1	P03952	KLKB1	kallikrein B1 [Source:HGNC Symbol;Acc:HGNC:6371]
	H0YBA3	Q02297	NRG1	neuregulin 1 [Source:HGNC Symbol;Acc:HGNC:7997]
	H0YKM0	O95267	RASGRP1	RAS guanyl releasing protein 1 [Source:HGNC Symbol;Acc:HGNC:9878]
	H0YLI7	P59780	AP3S2	adaptor related protein complex 3 subunit sigma 2 [Source:HGNC Symbol;Acc:HGNC:571]
	H0YMQ4	Q6P050	FBXL22	F-box and leucine rich repeat protein 22 [Source:HGNC Symbol;Acc:HGNC:27537]
	H3BMS5	Q6ZVD8	PHLPP2	PH domain and leucine rich repeat protein phosphatase 2 [Source:HGNC Symbol;Acc:HGNC:29149]
	H3BMW4	Q9BTX3	TMEM208	transmembrane protein 208 [Source:HGNC Symbol;Acc:HGNC:25015]
	H3BN78	Q9BSW7	SYT17	synaptotagmin 17 [Source:HGNC Symbol;Acc:HGNC:24119]
	H3BNW8	Q7Z402	TMC7	transmembrane channel like 7 [Source:HGNC Symbol;Acc:HGNC:23000]
	H3BPX2	A6NGQ3	OBSCN	Non-specific serine/threonine protein kinase
	H3BRN4	P80404	ABAT	4-aminobutyrate aminotransferase [Source:HGNC Symbol;Acc:HGNC:23]
	H3BS89	H3BS89	TMEM178B	transmembrane protein 178B [Source:HGNC Symbol;Acc:HGNC:44112]
	H3BUD5	Q96MX0	CMTM3	CKLF like MARVEL transmembrane domain containing 3 [Source:HGNC Symbol;Acc:HGNC:19174]
	H3BVA3	H0YL14	TMEM250	transmembrane protein 250 [Source:HGNC Symbol;Acc:HGNC:31009]
	H7BXZ5	O60229	KALRN	kalirin RhoGEF kinase [Source:HGNC Symbol;Acc:HGNC:4814]
	H7C0V4	Q9BZR6	RTN4R	reticulon 4 receptor [Source:HGNC Symbol;Acc:HGNC:18601]
	H7C2G2	Q93070	ART4	ADP-ribosyltransferase 4 (inactive) (Dombrock blood group) [Source:HGNC Symbol;Acc:HGNC:726]
	H7C3G0	P50876	RNF144A	ring finger protein 144A [Source:HGNC Symbol;Acc:HGNC:20457]
	H7C5E9	H7C5E9	SWI5	DNA repair protein SWI5 homolog
	H7C5F7	Q9NV92	NDFIP2	Nedd4 family interacting protein 2 [Source:HGNC Symbol;Acc:HGNC:18537]
	H8Y6P7	H8Y6P7	GCOM1	DNA-directed RNA polymerase II subunit GRINL1A
	H9KVA2	P45378	TNNT3	troponin T3, fast skeletal type [Source:HGNC Symbol;Acc:HGNC:11950]
	I3L265	Q8N4S7	PAQR4	progestin and adipoQ receptor family member 4 [Source:HGNC Symbol;Acc:HGNC:26386]
	I3L448	Q5TC12	ATPAF1	ATP synthase mitochondrial F1 complex assembly factor 1 [Source:HGNC Symbol;Acc:HGNC:18803]
	J3KN59	Q12982	BNIP2	BCL2 interacting protein 2 [Source:HGNC Symbol;Acc:HGNC:1083]
	J3KNA0	Q15070	OXA1L	OXA1L mitochondrial inner membrane protein [Source:HGNC Symbol;Acc:HGNC:8526]
	J3KNB4	P49913	CAMP	cathelicidin antimicrobial peptide [Source:HGNC Symbol;Acc:HGNC:1472]
	J3KNC6	Q14439	GPR176	G-protein coupled receptor 176
	J3KNF3	O43151	TET3	Methylcytosine dioxygenase TET3
	J3KNF6	Q6NW40	RGMB	repulsive guidance molecule BMP co-receptor b [Source:HGNC Symbol;Acc:HGNC:26896]
	J3KNH0	Q96MD2	KICS2	KICSTOR subunit 2 [Source:HGNC Symbol;Acc:HGNC:26517]
	J3KNI5	Q8N7C3	TRIML2	tripartite motif family like 2 [Source:HGNC Symbol;Acc:HGNC:26378]
	J3KNJ8	Q9NNZ3	DNAJC4	DnaJ heat shock protein family (Hsp40) member C4 [Source:HGNC Symbol;Acc:HGNC:5271]
	J3KNP4	Q9NPR2	SEMA4B	Semaphorin-4B
	J3KNZ9	Q9HAH7	FBRS	fibrosin [Source:HGNC Symbol;Acc:HGNC:20442]
	J3KP75	O75167	PHACTR2	phosphatase and actin regulator 2 [Source:HGNC Symbol;Acc:HGNC:20956]
	J3KPF0	J3KPF0	HECTD4	Probable E3 ubiquitin-protein ligase HECTD4
	J3KSS5	Q6QEF8	CORO6	coronin 6 [Source:HGNC Symbol;Acc:HGNC:21356]
	J3QS47	P49447	CYB561	cytochrome b561 [Source:HGNC Symbol;Acc:HGNC:2571]
	J3QSZ6	Q9NPI0	TMEM138	transmembrane protein 138 [Source:HGNC Symbol;Acc:HGNC:26944]
	K4DIA0	O75144	ICOSLG	inducible T cell costimulator ligand [Source:HGNC Symbol;Acc:HGNC:17087]
	K7EKM7	O75264	SMIM24	small integral membrane protein 24 [Source:HGNC Symbol;Acc:HGNC:37244]
	K7EPS8	Q9NSK7	C19orf12	chromosome 19 open reading frame 12 [Source:HGNC Symbol;Acc:HGNC:25443]
	K7EPW3	P10072	ZNF875	zinc finger protein 875 [Source:HGNC Symbol;Acc:HGNC:4928]
	K7ERI9	P02654	APOC1	apolipoprotein C1 [Source:HGNC Symbol;Acc:HGNC:607]
	K7N7A8	K7N7A8		Ubiquitin carboxyl-terminal hydrolase MINDY
	L0R6P0	P86397	HTD2	hydroxyacyl-thioester dehydratase type 2 [Source:HGNC Symbol;Acc:HGNC:53111]
	M0R0A5	Q6E0U4	DMKN	dermokine [Source:HGNC Symbol;Acc:HGNC:25063]
	M0R344	Q9NRA0	SPHK2	sphingosine kinase 2 [Source:HGNC Symbol;Acc:HGNC:18859]
	O00115	O00115	DNASE2	deoxyribonuclease 2, lysosomal [Source:HGNC Symbol;Acc:HGNC:2960]
	O00116	O00116	AGPS	alkylglycerone phosphate synthase [Source:HGNC Symbol;Acc:HGNC:327]
	O00124	O00124	UBXN8	UBX domain protein 8 [Source:HGNC Symbol;Acc:HGNC:30307]
	O00139	O00139	KIF2A	kinesin family member 2A [Source:HGNC Symbol;Acc:HGNC:6318]
	O00141	O00141	SGK1	serum/glucocorticoid regulated kinase 1 [Source:HGNC Symbol;Acc:HGNC:10810]
	O00142	O00142	TK2	thymidine kinase 2 [Source:HGNC Symbol;Acc:HGNC:11831]
	O00148	O00148	DDX39A	DExD-box helicase 39A [Source:HGNC Symbol;Acc:HGNC:17821]
	O00151	O00151	PDLIM1	PDZ and LIM domain 1 [Source:HGNC Symbol;Acc:HGNC:2067]
	O00154	O00154	ACOT7	acyl-CoA thioesterase 7 [Source:HGNC Symbol;Acc:HGNC:24157]
	O00159	O00159	MYO1C	myosin IC [Source:HGNC Symbol;Acc:HGNC:7597]
	O00160	O00160	MYO1F	myosin IF [Source:HGNC Symbol;Acc:HGNC:7600]
	O00161	O00161	SNAP23	synaptosome associated protein 23 [Source:HGNC Symbol;Acc:HGNC:11131]
	O00165	O00165	HAX1	HCLS1 associated protein X-1 [Source:HGNC Symbol;Acc:HGNC:16915]
	O00170	O00170	AIP	aryl hydrocarbon receptor interacting protein [Source:HGNC Symbol;Acc:HGNC:358]
	O00178	O00178	GTPBP1	GTP binding protein 1 [Source:HGNC Symbol;Acc:HGNC:4669]
	O00180	O00180	KCNK1	potassium two pore domain channel subfamily K member 1 [Source:HGNC Symbol;Acc:HGNC:6272]
	O00186	O00186	STXBP3	syntaxin binding protein 3 [Source:HGNC Symbol;Acc:HGNC:11446]
	O00187	O00187	MASP2	MBL associated serine protease 2 [Source:HGNC Symbol;Acc:HGNC:6902]
	O00189	O00189	AP4M1	adaptor related protein complex 4 subunit mu 1 [Source:HGNC Symbol;Acc:HGNC:574]
	O00192	O00192	ARVCF	ARVCF delta catenin family member [Source:HGNC Symbol;Acc:HGNC:728]
	O00193	O00193	C11orf58	chromosome 11 open reading frame 58 [Source:HGNC Symbol;Acc:HGNC:16990]
	O00194	O00194	RAB27B	RAB27B, member RAS oncogene family [Source:HGNC Symbol;Acc:HGNC:9767]
	O00203	O00203	AP3B1	adaptor related protein complex 3 subunit beta 1 [Source:HGNC Symbol;Acc:HGNC:566]
	O00204	O00204	SULT2B1	sulfotransferase family 2B member 1 [Source:HGNC Symbol;Acc:HGNC:11459]
	O00212	O00212	RHOD	ras homolog family member D [Source:HGNC Symbol;Acc:HGNC:670]
	O00213	O00213	APBB1	amyloid beta precursor protein binding family B member 1 [Source:HGNC Symbol;Acc:HGNC:581]
	O00214	O00214	LGALS8	galectin 8 [Source:HGNC Symbol;Acc:HGNC:6569]
	O00217	O00217	NDUFS8	NADH:ubiquinone oxidoreductase core subunit S8 [Source:HGNC Symbol;Acc:HGNC:7715]
	O00221	O00221	NFKBIE	NFKB inhibitor epsilon [Source:HGNC Symbol;Acc:HGNC:7799]
	O00222	O00222	GRM8	glutamate metabotropic receptor 8 [Source:HGNC Symbol;Acc:HGNC:4600]
	O00231	O00231	PSMD11	proteasome 26S subunit, non-ATPase 11 [Source:HGNC Symbol;Acc:HGNC:9556]
	O00232	O00232	PSMD12	proteasome 26S subunit, non-ATPase 12 [Source:HGNC Symbol;Acc:HGNC:9557]
	O00233	O00233	PSMD9	proteasome 26S subunit, non-ATPase 9 [Source:HGNC Symbol;Acc:HGNC:9567]
	O00238	O00238	BMPR1B	bone morphogenetic protein receptor type 1B [Source:HGNC Symbol;Acc:HGNC:1077]
	O00244	O00244	ATOX1	antioxidant 1 copper chaperone [Source:HGNC Symbol;Acc:HGNC:798]
	O00255	O00255	MEN1	menin 1 [Source:HGNC Symbol;Acc:HGNC:7010]
	O00257	O00257	CBX4	chromobox 4 [Source:HGNC Symbol;Acc:HGNC:1554]
	O00258	O00258	GET1	guided entry of tail-anchored proteins factor 1 [Source:HGNC Symbol;Acc:HGNC:12790]
	O00264	O00264	PGRMC1	progesterone receptor membrane component 1 [Source:HGNC Symbol;Acc:HGNC:16090]
	O00267	O00267	SUPT5H	SPT5 homolog, DSIF elongation factor subunit [Source:HGNC Symbol;Acc:HGNC:11469]
	O00268	O00268	TAF4	TATA-box binding protein associated factor 4 [Source:HGNC Symbol;Acc:HGNC:11537]
	O00273	O00273	DFFA	DNA fragmentation factor subunit alpha [Source:HGNC Symbol;Acc:HGNC:2772]
	O00287	O00287	RFXAP	regulatory factor X associated protein [Source:HGNC Symbol;Acc:HGNC:9988]
	O00291	O00291	HIP1	huntingtin interacting protein 1 [Source:HGNC Symbol;Acc:HGNC:4913]
	O00299	O00299	CLIC1	chloride intracellular channel 1 [Source:HGNC Symbol;Acc:HGNC:2062]
	O00300	O00300	TNFRSF11B	TNF receptor superfamily member 11b [Source:HGNC Symbol;Acc:HGNC:11909]
	O00303	O00303	EIF3F	eukaryotic translation initiation factor 3 subunit F [Source:HGNC Symbol;Acc:HGNC:3275]
	O00308	O00308	WWP2	WW domain containing E3 ubiquitin protein ligase 2 [Source:HGNC Symbol;Acc:HGNC:16804]
	O00311	O00311	CDC7	cell division cycle 7 [Source:HGNC Symbol;Acc:HGNC:1745]
	O00327	O00327	ARNTL	aryl hydrocarbon receptor nuclear translocator like [Source:HGNC Symbol;Acc:HGNC:701]
	O00330	O00330	PDHX	pyruvate dehydrogenase complex component X [Source:HGNC Symbol;Acc:HGNC:21350]
	O00338	O00338	SULT1C2	sulfotransferase family 1C member 2 [Source:HGNC Symbol;Acc:HGNC:11456]
	O00339	O00339	MATN2	matrilin 2 [Source:HGNC Symbol;Acc:HGNC:6908]
	O00391	O00391	QSOX1	quiescin sulfhydryl oxidase 1 [Source:HGNC Symbol;Acc:HGNC:9756]
	O00399	O00399	DCTN6	dynactin subunit 6 [Source:HGNC Symbol;Acc:HGNC:16964]
	O00400	O00400	SLC33A1	solute carrier family 33 member 1 [Source:HGNC Symbol;Acc:HGNC:95]
	O00401	O00401	WASL	WASP like actin nucleation promoting factor [Source:HGNC Symbol;Acc:HGNC:12735]
	O00408	O00408	PDE2A	phosphodiesterase 2A [Source:HGNC Symbol;Acc:HGNC:8777]
	O00409	O00409	FOXN3	forkhead box N3 [Source:HGNC Symbol;Acc:HGNC:1928]
	O00410	O00410	IPO5	importin 5 [Source:HGNC Symbol;Acc:HGNC:6402]
	O00411	O00411	POLRMT	RNA polymerase mitochondrial [Source:HGNC Symbol;Acc:HGNC:9200]
	O00418	O00418	EEF2K	eukaryotic elongation factor 2 kinase [Source:HGNC Symbol;Acc:HGNC:24615]
	O00422	O00422	SAP18	Sin3A associated protein 18 [Source:HGNC Symbol;Acc:HGNC:10530]
	O00423	O00423	EML1	EMAP like 1 [Source:HGNC Symbol;Acc:HGNC:3330]
	O00425	O00425	IGF2BP3	insulin like growth factor 2 mRNA binding protein 3 [Source:HGNC Symbol;Acc:HGNC:28868]
	O00429	O00429	DNM1L	dynamin 1 like [Source:HGNC Symbol;Acc:HGNC:2973]
	O00442	O00442	RTCA	RNA 3'-terminal phosphate cyclase [Source:HGNC Symbol;Acc:HGNC:17981]
	O00443	O00443	PIK3C2A	phosphatidylinositol-4-phosphate 3-kinase catalytic subunit type 2 alpha [Source:HGNC Symbol;Acc:HGNC:8971]
	O00444	O00444	PLK4	polo like kinase 4 [Source:HGNC Symbol;Acc:HGNC:11397]
	O00445	O00445	SYT5	synaptotagmin 5 [Source:HGNC Symbol;Acc:HGNC:11513]
	O00451	O00451	GFRA2	GDNF family receptor alpha 2 [Source:HGNC Symbol;Acc:HGNC:4244]
	O00458	O00458	IFRD1	interferon related developmental regulator 1 [Source:HGNC Symbol;Acc:HGNC:5456]
	O00459	O00459	PIK3R2	phosphoinositide-3-kinase regulatory subunit 2 [Source:HGNC Symbol;Acc:HGNC:8980]
	O00461	O00461	GOLIM4	golgi integral membrane protein 4 [Source:HGNC Symbol;Acc:HGNC:15448]
	O00462	O00462	MANBA	mannosidase beta [Source:HGNC Symbol;Acc:HGNC:6831]
	O00463	O00463	TRAF5	TNF receptor associated factor 5 [Source:HGNC Symbol;Acc:HGNC:12035]
	O00468	O00468	AGRN	agrin [Source:HGNC Symbol;Acc:HGNC:329]
	O00469	O00469	PLOD2	procollagen-lysine,2-oxoglutarate 5-dioxygenase 2 [Source:HGNC Symbol;Acc:HGNC:9082]
	O00470	O00470	MEIS1	Meis homeobox 1 [Source:HGNC Symbol;Acc:HGNC:7000]
	O00471	O00471	EXOC5	exocyst complex component 5 [Source:HGNC Symbol;Acc:HGNC:10696]
	O00472	O00472	ELL2	elongation factor for RNA polymerase II 2 [Source:HGNC Symbol;Acc:HGNC:17064]
	O00478	O00478	BTN3A3	butyrophilin subfamily 3 member A3 [Source:HGNC Symbol;Acc:HGNC:1140]
	O00479	O00479	HMGN4	high mobility group nucleosomal binding domain 4 [Source:HGNC Symbol;Acc:HGNC:4989]
	O00481	O00481	BTN3A1	butyrophilin subfamily 3 member A1 [Source:HGNC Symbol;Acc:HGNC:1138]
	O00482	O00482	NR5A2	nuclear receptor subfamily 5 group A member 2 [Source:HGNC Symbol;Acc:HGNC:7984]
	O00483	O00483	NDUFA4	NDUFA4 mitochondrial complex associated [Source:HGNC Symbol;Acc:HGNC:7687]
	O00487	O00487	PSMD14	proteasome 26S subunit, non-ATPase 14 [Source:HGNC Symbol;Acc:HGNC:16889]
	O00488	O00488	ZNF593	zinc finger protein 593 [Source:HGNC Symbol;Acc:HGNC:30943]
	O00499	O00499	BIN1	bridging integrator 1 [Source:HGNC Symbol;Acc:HGNC:1052]
	O00505	O00505	KPNA3	karyopherin subunit alpha 3 [Source:HGNC Symbol;Acc:HGNC:6396]
	O00506	O00506	STK25	serine/threonine kinase 25 [Source:HGNC Symbol;Acc:HGNC:11404]
	O00507	O00507	USP9Y	ubiquitin specific peptidase 9 Y-linked [Source:HGNC Symbol;Acc:HGNC:12633]
	O00512	O00512	BCL9	BCL9 transcription coactivator [Source:HGNC Symbol;Acc:HGNC:1008]
	O00515	O00515	LAD1	ladinin 1 [Source:HGNC Symbol;Acc:HGNC:6472]
	O00519	O00519	FAAH	fatty acid amide hydrolase [Source:HGNC Symbol;Acc:HGNC:3553]
	O00522	O00522	KRIT1	KRIT1 ankyrin repeat containing [Source:HGNC Symbol;Acc:HGNC:1573]
	O00534	O00534	VWA5A	von Willebrand factor A domain containing 5A [Source:HGNC Symbol;Acc:HGNC:6658]
	O00541	O00541	PES1	pescadillo ribosomal biogenesis factor 1 [Source:HGNC Symbol;Acc:HGNC:8848]
	O00559	O00559	EBAG9	estrogen receptor binding site associated antigen 9 [Source:HGNC Symbol;Acc:HGNC:3123]
	O00560	O00560	SDCBP	syndecan binding protein [Source:HGNC Symbol;Acc:HGNC:10662]
	O00562	O00562	PITPNM1	phosphatidylinositol transfer protein membrane associated 1 [Source:HGNC Symbol;Acc:HGNC:9003]
	O00566	O00566	MPHOSPH10	M-phase phosphoprotein 10 [Source:HGNC Symbol;Acc:HGNC:7213]
	O00567	O00567	NOP56	NOP56 ribonucleoprotein [Source:HGNC Symbol;Acc:HGNC:15911]
	O00571	O00571	DDX3X	DEAD-box helicase 3 X-linked [Source:HGNC Symbol;Acc:HGNC:2745]
	O00584	O00584	RNASET2	ribonuclease T2 [Source:HGNC Symbol;Acc:HGNC:21686]
	O00592	O00592	PODXL	podocalyxin like [Source:HGNC Symbol;Acc:HGNC:9171]
	O00622	O00622	CCN1	cellular communication network factor 1 [Source:HGNC Symbol;Acc:HGNC:2654]
	O00623	O00623	PEX12	peroxisomal biogenesis factor 12 [Source:HGNC Symbol;Acc:HGNC:8854]
	O00625	O00625	PIR	pirin [Source:HGNC Symbol;Acc:HGNC:30048]
	O00628	O00628	PEX7	peroxisomal biogenesis factor 7 [Source:HGNC Symbol;Acc:HGNC:8860]
	O00629	O00629	KPNA4	karyopherin subunit alpha 4 [Source:HGNC Symbol;Acc:HGNC:6397]
	O00635	O00635	TRIM38	tripartite motif containing 38 [Source:HGNC Symbol;Acc:HGNC:10059]
	O00712	O00712	NFIB	nuclear factor I B [Source:HGNC Symbol;Acc:HGNC:7785]
	O00716	O00716	E2F3	E2F transcription factor 3 [Source:HGNC Symbol;Acc:HGNC:3115]
	O00743	O00743	PPP6C	protein phosphatase 6 catalytic subunit [Source:HGNC Symbol;Acc:HGNC:9323]
	O00746	O00746	NME4	NME/NM23 nucleoside diphosphate kinase 4 [Source:HGNC Symbol;Acc:HGNC:7852]
	O00750	O00750	PIK3C2B	phosphatidylinositol-4-phosphate 3-kinase catalytic subunit type 2 beta [Source:HGNC Symbol;Acc:HGNC:8972]
	O00754	O00754	MAN2B1	mannosidase alpha class 2B member 1 [Source:HGNC Symbol;Acc:HGNC:6826]
	O00757	O00757	FBP2	fructose-bisphosphatase 2 [Source:HGNC Symbol;Acc:HGNC:3607]
	O00762	O00762	UBE2C	ubiquitin conjugating enzyme E2 C [Source:HGNC Symbol;Acc:HGNC:15937]
	O00763	O00763	ACACB	acetyl-CoA carboxylase beta [Source:HGNC Symbol;Acc:HGNC:85]
	O00764	O00764	PDXK	pyridoxal kinase [Source:HGNC Symbol;Acc:HGNC:8819]
	O00767	O00767	SCD	stearoyl-CoA desaturase [Source:HGNC Symbol;Acc:HGNC:10571]
	O14490	O14490	DLGAP1	DLG associated protein 1 [Source:HGNC Symbol;Acc:HGNC:2905]
	O14492	O14492	SH2B2	SH2B adaptor protein 2 [Source:HGNC Symbol;Acc:HGNC:17381]
	O14494	O14494	PLPP1	phospholipid phosphatase 1 [Source:HGNC Symbol;Acc:HGNC:9228]
	O14495	O14495	PLPP3	phospholipid phosphatase 3 [Source:HGNC Symbol;Acc:HGNC:9229]
	O14497	O14497	ARID1A	AT-rich interaction domain 1A [Source:HGNC Symbol;Acc:HGNC:11110]
	O14498	O14498	ISLR	immunoglobulin superfamily containing leucine rich repeat [Source:HGNC Symbol;Acc:HGNC:6133]
	O14503	O14503	BHLHE40	basic helix-loop-helix family member e40 [Source:HGNC Symbol;Acc:HGNC:1046]
	O14508	O14508	SOCS2	suppressor of cytokine signaling 2 [Source:HGNC Symbol;Acc:HGNC:19382]
	O14513	O14513	NCKAP5	NCK associated protein 5 [Source:HGNC Symbol;Acc:HGNC:29847]
	O14514	O14514	ADGRB1	adhesion G protein-coupled receptor B1 [Source:HGNC Symbol;Acc:HGNC:943]
	O14519	O14519	CDK2AP1	cyclin dependent kinase 2 associated protein 1 [Source:HGNC Symbol;Acc:HGNC:14002]
	O14520	O14520	AQP7	aquaporin 7 [Source:HGNC Symbol;Acc:HGNC:640]
	O14521	O14521	SDHD	succinate dehydrogenase complex subunit D [Source:HGNC Symbol;Acc:HGNC:10683]
	O14523	O14523	C2CD2L	C2CD2 like [Source:HGNC Symbol;Acc:HGNC:29000]
	O14524	O14524	NEMP1	nuclear envelope integral membrane protein 1 [Source:HGNC Symbol;Acc:HGNC:29001]
	O14526	O14526	FCHO1	FCH and mu domain containing endocytic adaptor 1 [Source:HGNC Symbol;Acc:HGNC:29002]
	O14529	O14529	CUX2	cut like homeobox 2 [Source:HGNC Symbol;Acc:HGNC:19347]
	O14530	O14530	TXNDC9	thioredoxin domain containing 9 [Source:HGNC Symbol;Acc:HGNC:24110]
	O14531	O14531	DPYSL4	dihydropyrimidinase like 4 [Source:HGNC Symbol;Acc:HGNC:3016]
	O14544	O14544	SOCS6	suppressor of cytokine signaling 6 [Source:HGNC Symbol;Acc:HGNC:16833]
	O14545	O14545	TRAFD1	TRAF-type zinc finger domain containing 1 [Source:HGNC Symbol;Acc:HGNC:24808]
	O14548	O14548	COX7A2L	cytochrome c oxidase subunit 7A2 like [Source:HGNC Symbol;Acc:HGNC:2289]
	O14559	O14559	ARHGAP33	Rho GTPase activating protein 33 [Source:HGNC Symbol;Acc:HGNC:23085]
	O14561	O14561	NDUFAB1	NADH:ubiquinone oxidoreductase subunit AB1 [Source:HGNC Symbol;Acc:HGNC:7694]
	O14562	O14562	UBFD1	ubiquitin family domain containing 1 [Source:HGNC Symbol;Acc:HGNC:30565]
	O14569	O14569	CYB561D2	cytochrome b561 family member D2 [Source:HGNC Symbol;Acc:HGNC:30253]
	O14576	O14576	DYNC1I1	dynein cytoplasmic 1 intermediate chain 1 [Source:HGNC Symbol;Acc:HGNC:2963]
	O14578	O14578	CIT	citron rho-interacting serine/threonine kinase [Source:HGNC Symbol;Acc:HGNC:1985]
	O14579	O14579	COPE	COPI coat complex subunit epsilon [Source:HGNC Symbol;Acc:HGNC:2234]
	O14593	O14593	RFXANK	regulatory factor X associated ankyrin containing protein [Source:HGNC Symbol;Acc:HGNC:9987]
	O14594	O14594	NCAN	neurocan [Source:HGNC Symbol;Acc:HGNC:2465]
	O14595	O14595	CTDSP2	CTD small phosphatase 2 [Source:HGNC Symbol;Acc:HGNC:17077]
	O14602	O14602	EIF1AY	eukaryotic translation initiation factor 1A Y-linked [Source:HGNC Symbol;Acc:HGNC:3252]
	O14613	O14613	CDC42EP2	CDC42 effector protein 2 [Source:HGNC Symbol;Acc:HGNC:16263]
	O14617	O14617	AP3D1	adaptor related protein complex 3 subunit delta 1 [Source:HGNC Symbol;Acc:HGNC:568]
	O14618	O14618	CCS	copper chaperone for superoxide dismutase [Source:HGNC Symbol;Acc:HGNC:1613]
	O14628	O14628	ZNF195	zinc finger protein 195 [Source:HGNC Symbol;Acc:HGNC:12986]
	O14639	O14639	ABLIM1	actin binding LIM protein 1 [Source:HGNC Symbol;Acc:HGNC:78]
	O14640	O14640	DVL1	dishevelled segment polarity protein 1 [Source:HGNC Symbol;Acc:HGNC:3084]
	O14641	O14641	DVL2	dishevelled segment polarity protein 2 [Source:HGNC Symbol;Acc:HGNC:3086]
	O14646	O14646	CHD1	chromodomain helicase DNA binding protein 1 [Source:HGNC Symbol;Acc:HGNC:1915]
	O14647	O14647	CHD2	chromodomain helicase DNA binding protein 2 [Source:HGNC Symbol;Acc:HGNC:1917]
	O14653	O14653	GOSR2	golgi SNAP receptor complex member 2 [Source:HGNC Symbol;Acc:HGNC:4431]
	O14654	O14654	IRS4	insulin receptor substrate 4 [Source:HGNC Symbol;Acc:HGNC:6128]
	O14656	O14656	TOR1A	torsin family 1 member A [Source:HGNC Symbol;Acc:HGNC:3098]
	O14657	O14657	TOR1B	torsin family 1 member B [Source:HGNC Symbol;Acc:HGNC:11995]
	O14662	O14662	STX16	syntaxin 16 [Source:HGNC Symbol;Acc:HGNC:11431]
	O14668	O14668	PRRG1	proline rich and Gla domain 1 [Source:HGNC Symbol;Acc:HGNC:9469]
	O14672	O14672	ADAM10	ADAM metallopeptidase domain 10 [Source:HGNC Symbol;Acc:HGNC:188]
	O14678	O14678	ABCD4	ATP binding cassette subfamily D member 4 [Source:HGNC Symbol;Acc:HGNC:68]
	O14681	O14681	EI24	EI24 autophagy associated transmembrane protein [Source:HGNC Symbol;Acc:HGNC:13276]
	O14682	O14682	ENC1	ectodermal-neural cortex 1 [Source:HGNC Symbol;Acc:HGNC:3345]
	O14683	O14683	TP53I11	tumor protein p53 inducible protein 11 [Source:HGNC Symbol;Acc:HGNC:16842]
	O14684	O14684	PTGES	prostaglandin E synthase [Source:HGNC Symbol;Acc:HGNC:9599]
	O14686	O14686	KMT2D	lysine methyltransferase 2D [Source:HGNC Symbol;Acc:HGNC:7133]
	O14709	O14709	ZNF197	zinc finger protein 197 [Source:HGNC Symbol;Acc:HGNC:12988]
	O14713	O14713	ITGB1BP1	integrin subunit beta 1 binding protein 1 [Source:HGNC Symbol;Acc:HGNC:23927]
	O14715	O14715	RGPD8	RANBP2 like and GRIP domain containing 8 [Source:HGNC Symbol;Acc:HGNC:9849]
	O14717	O14717	TRDMT1	tRNA aspartic acid methyltransferase 1 [Source:HGNC Symbol;Acc:HGNC:2977]
	O14727	O14727	APAF1	apoptotic peptidase activating factor 1 [Source:HGNC Symbol;Acc:HGNC:576]
	O14730	O14730	RIOK3	RIO kinase 3 [Source:HGNC Symbol;Acc:HGNC:11451]
	O14732	O14732	IMPA2	inositol monophosphatase 2 [Source:HGNC Symbol;Acc:HGNC:6051]
	O14733	O14733	MAP2K7	mitogen-activated protein kinase kinase 7 [Source:HGNC Symbol;Acc:HGNC:6847]
	O14734	O14734	ACOT8	acyl-CoA thioesterase 8 [Source:HGNC Symbol;Acc:HGNC:15919]
	O14735	O14735	CDIPT	CDP-diacylglycerol--inositol 3-phosphatidyltransferase [Source:HGNC Symbol;Acc:HGNC:1769]
	O14737	O14737	PDCD5	programmed cell death 5 [Source:HGNC Symbol;Acc:HGNC:8764]
	O14744	O14744	PRMT5	protein arginine methyltransferase 5 [Source:HGNC Symbol;Acc:HGNC:10894]
	O14745	O14745	SLC9A3R1	SLC9A3 regulator 1 [Source:HGNC Symbol;Acc:HGNC:11075]
	O14746	O14746	TERT	telomerase reverse transcriptase [Source:HGNC Symbol;Acc:HGNC:11730]
	O14753	O14753	OVOL1	ovo like transcriptional repressor 1 [Source:HGNC Symbol;Acc:HGNC:8525]
	O14757	O14757	CHEK1	checkpoint kinase 1 [Source:HGNC Symbol;Acc:HGNC:1925]
	O14763	O14763	TNFRSF10B	TNF receptor superfamily member 10b [Source:HGNC Symbol;Acc:HGNC:11905]
	O14770	O14770	MEIS2	Meis homeobox 2 [Source:HGNC Symbol;Acc:HGNC:7001]
	O14771	O14771	ZNF213	zinc finger protein 213 [Source:HGNC Symbol;Acc:HGNC:13005]
	O14772	O14772	FPGT	fucose-1-phosphate guanylyltransferase [Source:HGNC Symbol;Acc:HGNC:3825]
	O14773	O14773	TPP1	tripeptidyl peptidase 1 [Source:HGNC Symbol;Acc:HGNC:2073]
	O14775	O14775	GNB5	G protein subunit beta 5 [Source:HGNC Symbol;Acc:HGNC:4401]
	O14776	O14776	TCERG1	transcription elongation regulator 1 [Source:HGNC Symbol;Acc:HGNC:15630]
	O14777	O14777	NDC80	NDC80 kinetochore complex component [Source:HGNC Symbol;Acc:HGNC:16909]
	O14782	O14782	KIF3C	kinesin family member 3C [Source:HGNC Symbol;Acc:HGNC:6321]
	O14786	O14786	NRP1	neuropilin 1 [Source:HGNC Symbol;Acc:HGNC:8004]
	O14787	O14787	TNPO2	transportin 2 [Source:HGNC Symbol;Acc:HGNC:19998]
	O14791	O14791	APOL1	apolipoprotein L1 [Source:HGNC Symbol;Acc:HGNC:618]
	O14792	O14792	HS3ST1	heparan sulfate-glucosamine 3-sulfotransferase 1 [Source:HGNC Symbol;Acc:HGNC:5194]
	O14793	O14793	MSTN	myostatin [Source:HGNC Symbol;Acc:HGNC:4223]
	O14795	O14795	UNC13B	unc-13 homolog B [Source:HGNC Symbol;Acc:HGNC:12566]
	O14802	O14802	POLR3A	RNA polymerase III subunit A [Source:HGNC Symbol;Acc:HGNC:30074]
	O14807	O14807	MRAS	muscle RAS oncogene homolog [Source:HGNC Symbol;Acc:HGNC:7227]
	O14810	O14810	CPLX1	complexin 1 [Source:HGNC Symbol;Acc:HGNC:2309]
	O14813	O14813	PHOX2A	paired like homeobox 2A [Source:HGNC Symbol;Acc:HGNC:691]
	O14818	O14818	PSMA7	proteasome 20S subunit alpha 7 [Source:HGNC Symbol;Acc:HGNC:9536]
	O14827	O14827	RASGRF2	Ras protein specific guanine nucleotide releasing factor 2 [Source:HGNC Symbol;Acc:HGNC:9876]
	O14828	O14828	SCAMP3	secretory carrier membrane protein 3 [Source:HGNC Symbol;Acc:HGNC:10565]
	O14829	O14829	PPEF1	protein phosphatase with EF-hand domain 1 [Source:HGNC Symbol;Acc:HGNC:9243]
	O14832	O14832	PHYH	phytanoyl-CoA 2-hydroxylase [Source:HGNC Symbol;Acc:HGNC:8940]
	O14841	O14841	OPLAH	5-oxoprolinase, ATP-hydrolysing [Source:HGNC Symbol;Acc:HGNC:8149]
	O14863	O14863	SLC30A4	solute carrier family 30 member 4 [Source:HGNC Symbol;Acc:HGNC:11015]
	O14867	O14867	BACH1	BTB domain and CNC homolog 1 [Source:HGNC Symbol;Acc:HGNC:935]
	O14874	O14874	BCKDK	branched chain keto acid dehydrogenase kinase [Source:HGNC Symbol;Acc:HGNC:16902]
	O14879	O14879	IFIT3	interferon induced protein with tetratricopeptide repeats 3 [Source:HGNC Symbol;Acc:HGNC:5411]
	O14880	O14880	MGST3	microsomal glutathione S-transferase 3 [Source:HGNC Symbol;Acc:HGNC:7064]
	O14893	O14893	GEMIN2	gem nuclear organelle associated protein 2 [Source:HGNC Symbol;Acc:HGNC:10884]
	O14896	O14896	IRF6	interferon regulatory factor 6 [Source:HGNC Symbol;Acc:HGNC:6121]
	O14907	O14907	TAX1BP3	Tax1 binding protein 3 [Source:HGNC Symbol;Acc:HGNC:30684]
	O14908	O14908	GIPC1	GIPC PDZ domain containing family member 1 [Source:HGNC Symbol;Acc:HGNC:1226]
	O14910	O14910	LIN7A	lin-7 homolog A, crumbs cell polarity complex component [Source:HGNC Symbol;Acc:HGNC:17787]
	O14917	O14917	PCDH17	protocadherin 17 [Source:HGNC Symbol;Acc:HGNC:14267]
	O14920	O14920	IKBKB	inhibitor of nuclear factor kappa B kinase subunit beta [Source:HGNC Symbol;Acc:HGNC:5960]
	O14924	O14924	RGS12	regulator of G protein signaling 12 [Source:HGNC Symbol;Acc:HGNC:9994]
	O14925	O14925	TIMM23	translocase of inner mitochondrial membrane 23 [Source:HGNC Symbol;Acc:HGNC:17312]
	O14929	O14929	HAT1	histone acetyltransferase 1 [Source:HGNC Symbol;Acc:HGNC:4821]
	O14933	O14933	UBE2L6	ubiquitin conjugating enzyme E2 L6 [Source:HGNC Symbol;Acc:HGNC:12490]
	O14936	O14936	CASK	calcium/calmodulin dependent serine protein kinase [Source:HGNC Symbol;Acc:HGNC:1497]
	O14939	O14939	PLD2	phospholipase D2 [Source:HGNC Symbol;Acc:HGNC:9068]
	O14944	O14944	EREG	epiregulin [Source:HGNC Symbol;Acc:HGNC:3443]
	O14949	O14949	UQCRQ	ubiquinol-cytochrome c reductase complex III subunit VII [Source:HGNC Symbol;Acc:HGNC:29594]
	O14964	O14964	HGS	hepatocyte growth factor-regulated tyrosine kinase substrate [Source:HGNC Symbol;Acc:HGNC:4897]
	O14965	O14965	AURKA	aurora kinase A [Source:HGNC Symbol;Acc:HGNC:11393]
	O14966	O14966	RAB29	RAB29, member RAS oncogene family [Source:HGNC Symbol;Acc:HGNC:9789]
	O14967	O14967	CLGN	calmegin [Source:HGNC Symbol;Acc:HGNC:2060]
	O14972	O14972	VPS26C	VPS26 endosomal protein sorting factor C [Source:HGNC Symbol;Acc:HGNC:3044]
	O14974	O14974	PPP1R12A	protein phosphatase 1 regulatory subunit 12A [Source:HGNC Symbol;Acc:HGNC:7618]
	O14975	O14975	SLC27A2	solute carrier family 27 member 2 [Source:HGNC Symbol;Acc:HGNC:10996]
	O14976	O14976	GAK	cyclin G associated kinase [Source:HGNC Symbol;Acc:HGNC:4113]
	O14977	O14977	AZIN1	antizyme inhibitor 1 [Source:HGNC Symbol;Acc:HGNC:16432]
	O14978	O14978	ZNF263	zinc finger protein 263 [Source:HGNC Symbol;Acc:HGNC:13056]
	O14979	O14979	HNRNPDL	heterogeneous nuclear ribonucleoprotein D like [Source:HGNC Symbol;Acc:HGNC:5037]
	O14980	O14980	XPO1	exportin 1 [Source:HGNC Symbol;Acc:HGNC:12825]
	O14981	O14981	BTAF1	B-TFIID TATA-box binding protein associated factor 1 [Source:HGNC Symbol;Acc:HGNC:17307]
	O14983	O14983	ATP2A1	ATPase sarcoplasmic/endoplasmic reticulum Ca2+ transporting 1 [Source:HGNC Symbol;Acc:HGNC:811]
	O14986	O14986	PIP5K1B	phosphatidylinositol-4-phosphate 5-kinase type 1 beta [Source:HGNC Symbol;Acc:HGNC:8995]
	O14994	O14994	SYN3	synapsin III [Source:HGNC Symbol;Acc:HGNC:11496]
	O15013	O15013	ARHGEF10	Rho guanine nucleotide exchange factor 10 [Source:HGNC Symbol;Acc:HGNC:14103]
	O15014	O15014	ZNF609	zinc finger protein 609 [Source:HGNC Symbol;Acc:HGNC:29003]
	O15015	O15015	ZNF646	zinc finger protein 646 [Source:HGNC Symbol;Acc:HGNC:29004]
	O15018	O15018	PDZD2	PDZ domain containing 2 [Source:HGNC Symbol;Acc:HGNC:18486]
	O15020	O15020	SPTBN2	spectrin beta, non-erythrocytic 2 [Source:HGNC Symbol;Acc:HGNC:11276]
	O15021	O15021	MAST4	microtubule associated serine/threonine kinase family member 4 [Source:HGNC Symbol;Acc:HGNC:19037]
	O15027	O15027	SEC16A	SEC16 homolog A, endoplasmic reticulum export factor [Source:HGNC Symbol;Acc:HGNC:29006]
	O15031	O15031	PLXNB2	plexin B2 [Source:HGNC Symbol;Acc:HGNC:9104]
	O15033	O15033	AREL1	apoptosis resistant E3 ubiquitin protein ligase 1 [Source:HGNC Symbol;Acc:HGNC:20363]
	O15034	O15034	RIMBP2	RIMS binding protein 2 [Source:HGNC Symbol;Acc:HGNC:30339]
	O15037	O15037	KHNYN	KH and NYN domain containing [Source:HGNC Symbol;Acc:HGNC:20166]
	O15040	O15040	TECPR2	tectonin beta-propeller repeat containing 2 [Source:HGNC Symbol;Acc:HGNC:19957]
	O15041	O15041	SEMA3E	semaphorin 3E [Source:HGNC Symbol;Acc:HGNC:10727]
	O15042	O15042	U2SURP	U2 snRNP associated SURP domain containing [Source:HGNC Symbol;Acc:HGNC:30855]
	O15047	O15047	SETD1A	SET domain containing 1A, histone lysine methyltransferase [Source:HGNC Symbol;Acc:HGNC:29010]
	O15049	O15049	N4BP3	NEDD4 binding protein 3 [Source:HGNC Symbol;Acc:HGNC:29852]
	O15050	O15050	TRANK1	tetratricopeptide repeat and ankyrin repeat containing 1 [Source:HGNC Symbol;Acc:HGNC:29011]
	O15054	O15054	KDM6B	lysine demethylase 6B [Source:HGNC Symbol;Acc:HGNC:29012]
	O15055	O15055	PER2	period circadian regulator 2 [Source:HGNC Symbol;Acc:HGNC:8846]
	O15056	O15056	SYNJ2	synaptojanin 2 [Source:HGNC Symbol;Acc:HGNC:11504]
	O15060	O15060	ZBTB39	zinc finger and BTB domain containing 39 [Source:HGNC Symbol;Acc:HGNC:29014]
	O15061	O15061	SYNM	synemin [Source:HGNC Symbol;Acc:HGNC:24466]
	O15062	O15062	ZBTB5	zinc finger and BTB domain containing 5 [Source:HGNC Symbol;Acc:HGNC:23836]
	O15063	O15063	GARRE1	granule associated Rac and RHOG effector 1 [Source:HGNC Symbol;Acc:HGNC:29016]
	O15066	O15066	KIF3B	kinesin family member 3B [Source:HGNC Symbol;Acc:HGNC:6320]
	O15067	O15067	PFAS	phosphoribosylformylglycinamidine synthase [Source:HGNC Symbol;Acc:HGNC:8863]
	O15068	O15068	MCF2L	MCF.2 cell line derived transforming sequence like [Source:HGNC Symbol;Acc:HGNC:14576]
	O15069	O15069	NACAD	NAC alpha domain containing [Source:HGNC Symbol;Acc:HGNC:22196]
	O15072	O15072	ADAMTS3	ADAM metallopeptidase with thrombospondin type 1 motif 3 [Source:HGNC Symbol;Acc:HGNC:219]
	O15075	O15075	DCLK1	doublecortin like kinase 1 [Source:HGNC Symbol;Acc:HGNC:2700]
	O15078	O15078	CEP290	centrosomal protein 290 [Source:HGNC Symbol;Acc:HGNC:29021]
	O15079	O15079	SNPH	syntaphilin [Source:HGNC Symbol;Acc:HGNC:15931]
	O15083	O15083	ERC2	ELKS/RAB6-interacting/CAST family member 2 [Source:HGNC Symbol;Acc:HGNC:31922]
	O15084	O15084	ANKRD28	ankyrin repeat domain 28 [Source:HGNC Symbol;Acc:HGNC:29024]
	O15085	O15085	ARHGEF11	Rho guanine nucleotide exchange factor 11 [Source:HGNC Symbol;Acc:HGNC:14580]
	O15090	O15090	ZNF536	zinc finger protein 536 [Source:HGNC Symbol;Acc:HGNC:29025]
	O15091	O15091	PRORP	protein only RNase P catalytic subunit [Source:HGNC Symbol;Acc:HGNC:19958]
	O15111	O15111	CHUK	component of inhibitor of nuclear factor kappa B kinase complex [Source:HGNC Symbol;Acc:HGNC:1974]
	O15116	O15116	LSM1	LSM1 homolog, mRNA degradation associated [Source:HGNC Symbol;Acc:HGNC:20472]
	O15118	O15118	NPC1	NPC intracellular cholesterol transporter 1 [Source:HGNC Symbol;Acc:HGNC:7897]
	O15119	O15119	TBX3	T-box transcription factor 3 [Source:HGNC Symbol;Acc:HGNC:11602]
	O15120	O15120	AGPAT2	1-acylglycerol-3-phosphate O-acyltransferase 2 [Source:HGNC Symbol;Acc:HGNC:325]
	O15121	O15121	DEGS1	delta 4-desaturase, sphingolipid 1 [Source:HGNC Symbol;Acc:HGNC:13709]
	O15126	O15126	SCAMP1	secretory carrier membrane protein 1 [Source:HGNC Symbol;Acc:HGNC:10563]
	O15127	O15127	SCAMP2	secretory carrier membrane protein 2 [Source:HGNC Symbol;Acc:HGNC:10564]
	O15131	O15131	KPNA5	karyopherin subunit alpha 5 [Source:HGNC Symbol;Acc:HGNC:6398]
	O15143	O15143	ARPC1B	actin related protein 2/3 complex subunit 1B [Source:HGNC Symbol;Acc:HGNC:704]
	O15144	O15144	ARPC2	actin related protein 2/3 complex subunit 2 [Source:HGNC Symbol;Acc:HGNC:705]
	O15145	O15145	ARPC3	actin related protein 2/3 complex subunit 3 [Source:HGNC Symbol;Acc:HGNC:706]
	O15151	O15151	MDM4	MDM4 regulator of p53 [Source:HGNC Symbol;Acc:HGNC:6974]
	O15155	O15155	BET1	Bet1 golgi vesicular membrane trafficking protein [Source:HGNC Symbol;Acc:HGNC:14562]
	O15156	O15156	ZBTB7B	zinc finger and BTB domain containing 7B [Source:HGNC Symbol;Acc:HGNC:18668]
	O15160	O15160	POLR1C	RNA polymerase I and III subunit C [Source:HGNC Symbol;Acc:HGNC:20194]
	O15162	O15162	PLSCR1	phospholipid scramblase 1 [Source:HGNC Symbol;Acc:HGNC:9092]
	O15164	O15164	TRIM24	tripartite motif containing 24 [Source:HGNC Symbol;Acc:HGNC:11812]
	O15169	O15169	AXIN1	axin 1 [Source:HGNC Symbol;Acc:HGNC:903]
	O15173	O15173	PGRMC2	progesterone receptor membrane component 2 [Source:HGNC Symbol;Acc:HGNC:16089]
	O15182	O15182	CETN3	centrin 3 [Source:HGNC Symbol;Acc:HGNC:1868]
	O15194	O15194	CTDSPL	CTD small phosphatase like [Source:HGNC Symbol;Acc:HGNC:16890]
	O15195	O15195	VILL	villin like [Source:HGNC Symbol;Acc:HGNC:30906]
	O15197	O15197	EPHB6	Ephrin type-B receptor 6
	O15198	O15198	SMAD9	SMAD family member 9 [Source:HGNC Symbol;Acc:HGNC:6774]
	O15204	O15204	ADAMDEC1	ADAM like decysin 1 [Source:HGNC Symbol;Acc:HGNC:16299]
	O15209	O15209	ZBTB22	zinc finger and BTB domain containing 22 [Source:HGNC Symbol;Acc:HGNC:13085]
	O15211	O15211	RGL2	ral guanine nucleotide dissociation stimulator like 2 [Source:HGNC Symbol;Acc:HGNC:9769]
	O15212	O15212	PFDN6	prefoldin subunit 6 [Source:HGNC Symbol;Acc:HGNC:4926]
	O15213	O15213	WDR46	WD repeat domain 46 [Source:HGNC Symbol;Acc:HGNC:13923]
	O15217	O15217	GSTA4	glutathione S-transferase alpha 4 [Source:HGNC Symbol;Acc:HGNC:4629]
	O15226	O15226	NKRF	NFKB repressing factor [Source:HGNC Symbol;Acc:HGNC:19374]
	O15228	O15228	GNPAT	glyceronephosphate O-acyltransferase [Source:HGNC Symbol;Acc:HGNC:4416]
	O15230	O15230	LAMA5	laminin subunit alpha 5 [Source:HGNC Symbol;Acc:HGNC:6485]
	O15231	O15231	ZNF185	zinc finger protein 185 with LIM domain [Source:HGNC Symbol;Acc:HGNC:12976]
	O15232	O15232	MATN3	matrilin 3 [Source:HGNC Symbol;Acc:HGNC:6909]
	O15234	O15234	CASC3	CASC3 exon junction complex subunit [Source:HGNC Symbol;Acc:HGNC:17040]
	O15235	O15235	MRPS12	mitochondrial ribosomal protein S12 [Source:HGNC Symbol;Acc:HGNC:10380]
	O15239	O15239	NDUFA1	NADH:ubiquinone oxidoreductase subunit A1 [Source:HGNC Symbol;Acc:HGNC:7683]
	O15240	O15240	VGF	VGF nerve growth factor inducible [Source:HGNC Symbol;Acc:HGNC:12684]
	O15254	O15254	ACOX3	acyl-CoA oxidase 3, pristanoyl [Source:HGNC Symbol;Acc:HGNC:121]
	O15258	O15258	RER1	retention in endoplasmic reticulum sorting receptor 1 [Source:HGNC Symbol;Acc:HGNC:30309]
	O15259	O15259	NPHP1	nephrocystin 1 [Source:HGNC Symbol;Acc:HGNC:7905]
	O15260	O15260	SURF4	surfeit 4 [Source:HGNC Symbol;Acc:HGNC:11476]
	O15263	O15263	DEFB4A	defensin beta 4A [Source:HGNC Symbol;Acc:HGNC:2767]
	O15264	O15264	MAPK13	mitogen-activated protein kinase 13 [Source:HGNC Symbol;Acc:HGNC:6875]
	O15265	O15265	ATXN7	ataxin 7 [Source:HGNC Symbol;Acc:HGNC:10560]
	O15269	O15269	SPTLC1	serine palmitoyltransferase long chain base subunit 1 [Source:HGNC Symbol;Acc:HGNC:11277]
	O15270	O15270	SPTLC2	serine palmitoyltransferase long chain base subunit 2 [Source:HGNC Symbol;Acc:HGNC:11278]
	O15287	O15287	FANCG	FA complementation group G [Source:HGNC Symbol;Acc:HGNC:3588]
	O15294	O15294	OGT	O-linked N-acetylglucosamine (GlcNAc) transferase [Source:HGNC Symbol;Acc:HGNC:8127]
	O15296	O15296	ALOX15B	arachidonate 15-lipoxygenase type B [Source:HGNC Symbol;Acc:HGNC:434]
	O15297	O15297	PPM1D	protein phosphatase, Mg2+/Mn2+ dependent 1D [Source:HGNC Symbol;Acc:HGNC:9277]
	O15304	O15304	SIVA1	SIVA1 apoptosis inducing factor [Source:HGNC Symbol;Acc:HGNC:17712]
	O15305	O15305	PMM2	phosphomannomutase 2 [Source:HGNC Symbol;Acc:HGNC:9115]
	O15315	O15315	RAD51B	RAD51 paralog B [Source:HGNC Symbol;Acc:HGNC:9822]
	O15318	O15318	POLR3G	RNA polymerase III subunit G [Source:HGNC Symbol;Acc:HGNC:30075]
	O15327	O15327	INPP4B	inositol polyphosphate-4-phosphatase type II B [Source:HGNC Symbol;Acc:HGNC:6075]
	O15344	O15344	MID1	midline 1 [Source:HGNC Symbol;Acc:HGNC:7095]
	O15347	O15347	HMGB3	high mobility group box 3 [Source:HGNC Symbol;Acc:HGNC:5004]
	O15350	O15350	TP73	tumor protein p73 [Source:HGNC Symbol;Acc:HGNC:12003]
	O15354	O15354	GPR37	G protein-coupled receptor 37 [Source:HGNC Symbol;Acc:HGNC:4494]
	O15355	O15355	PPM1G	protein phosphatase, Mg2+/Mn2+ dependent 1G [Source:HGNC Symbol;Acc:HGNC:9278]
	O15357	O15357	INPPL1	inositol polyphosphate phosphatase like 1 [Source:HGNC Symbol;Acc:HGNC:6080]
	O15360	O15360	FANCA	FA complementation group A [Source:HGNC Symbol;Acc:HGNC:3582]
	O15370	O15370	SOX12	SRY-box transcription factor 12 [Source:HGNC Symbol;Acc:HGNC:11198]
	O15371	O15371	EIF3D	eukaryotic translation initiation factor 3 subunit D [Source:HGNC Symbol;Acc:HGNC:3278]
	O15372	O15372	EIF3H	eukaryotic translation initiation factor 3 subunit H [Source:HGNC Symbol;Acc:HGNC:3273]
	O15379	O15379	HDAC3	histone deacetylase 3 [Source:HGNC Symbol;Acc:HGNC:4854]
	O15381	O15381	NVL	nuclear VCP like [Source:HGNC Symbol;Acc:HGNC:8070]
	O15382	O15382	BCAT2	branched chain amino acid transaminase 2 [Source:HGNC Symbol;Acc:HGNC:977]
	O15391	O15391	YY2	YY2 transcription factor [Source:HGNC Symbol;Acc:HGNC:31684]
	O15392	O15392	BIRC5	baculoviral IAP repeat containing 5 [Source:HGNC Symbol;Acc:HGNC:593]
	O15393	O15393	TMPRSS2	transmembrane serine protease 2 [Source:HGNC Symbol;Acc:HGNC:11876]
	O15397	O15397	IPO8	importin 8 [Source:HGNC Symbol;Acc:HGNC:9853]
	O15400	O15400	STX7	syntaxin 7 [Source:HGNC Symbol;Acc:HGNC:11442]
	O15409	O15409	FOXP2	forkhead box P2 [Source:HGNC Symbol;Acc:HGNC:13875]
	O15417	O15417	TNRC18	trinucleotide repeat containing 18 [Source:HGNC Symbol;Acc:HGNC:11962]
	O15427	O15427	SLC16A3	solute carrier family 16 member 3 [Source:HGNC Symbol;Acc:HGNC:10924]
	O15431	O15431	SLC31A1	solute carrier family 31 member 1 [Source:HGNC Symbol;Acc:HGNC:11016]
	O15438	O15438	ABCC3	ATP binding cassette subfamily C member 3 [Source:HGNC Symbol;Acc:HGNC:54]
	O15439	O15439	ABCC4	ATP binding cassette subfamily C member 4 [Source:HGNC Symbol;Acc:HGNC:55]
	O15440	O15440	ABCC5	ATP binding cassette subfamily C member 5 [Source:HGNC Symbol;Acc:HGNC:56]
	O15446	O15446	POLR1G	RNA polymerase I subunit G [Source:HGNC Symbol;Acc:HGNC:24219]
	O15455	O15455	TLR3	toll like receptor 3 [Source:HGNC Symbol;Acc:HGNC:11849]
	O15460	O15460	P4HA2	prolyl 4-hydroxylase subunit alpha 2 [Source:HGNC Symbol;Acc:HGNC:8547]
	O15479	O15479	MAGEB2	MAGE family member B2 [Source:HGNC Symbol;Acc:HGNC:6809]
	O15488	O15488	GYG2	glycogenin 2 [Source:HGNC Symbol;Acc:HGNC:4700]
	O15498	O15498	YKT6	YKT6 v-SNARE homolog [Source:HGNC Symbol;Acc:HGNC:16959]
	O15504	O15504	NUP42	nucleoporin 42 [Source:HGNC Symbol;Acc:HGNC:17010]
	O15511	O15511	ARPC5	actin related protein 2/3 complex subunit 5 [Source:HGNC Symbol;Acc:HGNC:708]
	O15514	O15514	POLR2D	RNA polymerase II subunit D [Source:HGNC Symbol;Acc:HGNC:9191]
	O15516	O15516	CLOCK	clock circadian regulator [Source:HGNC Symbol;Acc:HGNC:2082]
	O15519	O15519	CFLAR	CASP8 and FADD like apoptosis regulator [Source:HGNC Symbol;Acc:HGNC:1876]
	O15522	O15522	NKX2-8	NK2 homeobox 8 [Source:HGNC Symbol;Acc:HGNC:16364]
	O15523	O15523	DDX3Y	DEAD-box helicase 3 Y-linked [Source:HGNC Symbol;Acc:HGNC:2699]
	O15525	O15525	MAFG	MAF bZIP transcription factor G [Source:HGNC Symbol;Acc:HGNC:6781]
	O15527	O15527	OGG1	8-oxoguanine DNA glycosylase [Source:HGNC Symbol;Acc:HGNC:8125]
	O15528	O15528	CYP27B1	cytochrome P450 family 27 subfamily B member 1 [Source:HGNC Symbol;Acc:HGNC:2606]
	O15530	O15530	PDPK1	3-phosphoinositide dependent protein kinase 1 [Source:HGNC Symbol;Acc:HGNC:8816]
	O15534	O15534	PER1	period circadian regulator 1 [Source:HGNC Symbol;Acc:HGNC:8845]
	O15535	O15535	ZSCAN9	zinc finger and SCAN domain containing 9 [Source:HGNC Symbol;Acc:HGNC:12984]
	O15539	O15539	RGS5	regulator of G protein signaling 5 [Source:HGNC Symbol;Acc:HGNC:10001]
	O15541	O15541	RNF113A	ring finger protein 113A [Source:HGNC Symbol;Acc:HGNC:12974]
	O15551	O15551	CLDN3	claudin 3 [Source:HGNC Symbol;Acc:HGNC:2045]
	O15554	O15554	KCNN4	potassium calcium-activated channel subfamily N member 4 [Source:HGNC Symbol;Acc:HGNC:6293]
	O43143	O43143	DHX15	DEAH-box helicase 15 [Source:HGNC Symbol;Acc:HGNC:2738]
	O43147	O43147	SGSM2	small G protein signaling modulator 2 [Source:HGNC Symbol;Acc:HGNC:29026]
	O43148	O43148	RNMT	RNA guanine-7 methyltransferase [Source:HGNC Symbol;Acc:HGNC:10075]
	O43149	O43149	ZZEF1	zinc finger ZZ-type and EF-hand domain containing 1 [Source:HGNC Symbol;Acc:HGNC:29027]
	O43150	O43150	ASAP2	ArfGAP with SH3 domain, ankyrin repeat and PH domain 2 [Source:HGNC Symbol;Acc:HGNC:2721]
	O43156	O43156	TTI1	TELO2 interacting protein 1 [Source:HGNC Symbol;Acc:HGNC:29029]
	O43157	O43157	PLXNB1	plexin B1 [Source:HGNC Symbol;Acc:HGNC:9103]
	O43159	O43159	RRP8	ribosomal RNA processing 8 [Source:HGNC Symbol;Acc:HGNC:29030]
	O43164	O43164	PJA2	praja ring finger ubiquitin ligase 2 [Source:HGNC Symbol;Acc:HGNC:17481]
	O43166	O43166	SIPA1L1	signal induced proliferation associated 1 like 1 [Source:HGNC Symbol;Acc:HGNC:20284]
	O43167	O43167	ZBTB24	zinc finger and BTB domain containing 24 [Source:HGNC Symbol;Acc:HGNC:21143]
	O43172	O43172	PRPF4	pre-mRNA processing factor 4 [Source:HGNC Symbol;Acc:HGNC:17349]
	O43173	O43173	ST8SIA3	ST8 alpha-N-acetyl-neuraminide alpha-2,8-sialyltransferase 3 [Source:HGNC Symbol;Acc:HGNC:14269]
	O43174	O43174	CYP26A1	cytochrome P450 family 26 subfamily A member 1 [Source:HGNC Symbol;Acc:HGNC:2603]
	O43175	O43175	PHGDH	phosphoglycerate dehydrogenase [Source:HGNC Symbol;Acc:HGNC:8923]
	O43181	O43181	NDUFS4	NADH:ubiquinone oxidoreductase subunit S4 [Source:HGNC Symbol;Acc:HGNC:7711]
	O43182	O43182	ARHGAP6	Rho GTPase activating protein 6 [Source:HGNC Symbol;Acc:HGNC:676]
	O43184	O43184	ADAM12	ADAM metallopeptidase domain 12 [Source:HGNC Symbol;Acc:HGNC:190]
	O43187	O43187	IRAK2	interleukin 1 receptor associated kinase 2 [Source:HGNC Symbol;Acc:HGNC:6113]
	O43189	O43189	PHF1	PHD finger protein 1 [Source:HGNC Symbol;Acc:HGNC:8919]
	O43194	O43194	GPR39	G protein-coupled receptor 39 [Source:HGNC Symbol;Acc:HGNC:4496]
	O43196	O43196	MSH5	mutS homolog 5 [Source:HGNC Symbol;Acc:HGNC:7328]
	O43236	O43236	SEPTIN4	septin 4 [Source:HGNC Symbol;Acc:HGNC:9165]
	O43237	O43237	DYNC1LI2	dynein cytoplasmic 1 light intermediate chain 2 [Source:HGNC Symbol;Acc:HGNC:2966]
	O43240	O43240	KLK10	kallikrein related peptidase 10 [Source:HGNC Symbol;Acc:HGNC:6358]
	O43242	O43242	PSMD3	proteasome 26S subunit, non-ATPase 3 [Source:HGNC Symbol;Acc:HGNC:9560]
	O43248	O43248	HOXC11	homeobox C11 [Source:HGNC Symbol;Acc:HGNC:5123]
	O43251	O43251	RBFOX2	RNA binding fox-1 homolog 2 [Source:HGNC Symbol;Acc:HGNC:9906]
	O43252	O43252	PAPSS1	3'-phosphoadenosine 5'-phosphosulfate synthase 1 [Source:HGNC Symbol;Acc:HGNC:8603]
	O43255	O43255	SIAH2	siah E3 ubiquitin protein ligase 2 [Source:HGNC Symbol;Acc:HGNC:10858]
	O43257	O43257	ZNHIT1	zinc finger HIT-type containing 1 [Source:HGNC Symbol;Acc:HGNC:21688]
	O43264	O43264	ZW10	zw10 kinetochore protein [Source:HGNC Symbol;Acc:HGNC:13194]
	O43272	O43272	PRODH	proline dehydrogenase 1 [Source:HGNC Symbol;Acc:HGNC:9453]
	O43278	O43278	SPINT1	serine peptidase inhibitor, Kunitz type 1 [Source:HGNC Symbol;Acc:HGNC:11246]
	O43281	O43281	EFS	embryonal Fyn-associated substrate [Source:HGNC Symbol;Acc:HGNC:16898]
	O43286	O43286	B4GALT5	beta-1,4-galactosyltransferase 5 [Source:HGNC Symbol;Acc:HGNC:928]
	O43290	O43290	SART1	spliceosome associated factor 1, recruiter of U4/U6.U5 tri-snRNP [Source:HGNC Symbol;Acc:HGNC:10538]
	O43291	O43291	SPINT2	serine peptidase inhibitor, Kunitz type 2 [Source:HGNC Symbol;Acc:HGNC:11247]
	O43292	O43292	GPAA1	glycosylphosphatidylinositol anchor attachment 1 [Source:HGNC Symbol;Acc:HGNC:4446]
	O43293	O43293	DAPK3	death associated protein kinase 3 [Source:HGNC Symbol;Acc:HGNC:2676]
	O43294	O43294	TGFB1I1	transforming growth factor beta 1 induced transcript 1 [Source:HGNC Symbol;Acc:HGNC:11767]
	O43295	O43295	SRGAP3	SLIT-ROBO Rho GTPase activating protein 3 [Source:HGNC Symbol;Acc:HGNC:19744]
	O43296	O43296	ZNF264	zinc finger protein 264 [Source:HGNC Symbol;Acc:HGNC:13057]
	O43298	O43298	ZBTB43	zinc finger and BTB domain containing 43 [Source:HGNC Symbol;Acc:HGNC:17908]
	O43299	O43299	AP5Z1	adaptor related protein complex 5 subunit zeta 1 [Source:HGNC Symbol;Acc:HGNC:22197]
	O43301	O43301	HSPA12A	heat shock protein family A (Hsp70) member 12A [Source:HGNC Symbol;Acc:HGNC:19022]
	O43303	O43303	CCP110	centriolar coiled-coil protein 110 [Source:HGNC Symbol;Acc:HGNC:24342]
	O43306	O43306	ADCY6	adenylate cyclase 6 [Source:HGNC Symbol;Acc:HGNC:237]
	O43307	O43307	ARHGEF9	Cdc42 guanine nucleotide exchange factor 9 [Source:HGNC Symbol;Acc:HGNC:14561]
	O43309	O43309	ZSCAN12	zinc finger and SCAN domain containing 12 [Source:HGNC Symbol;Acc:HGNC:13172]
	O43310	O43310	CTIF	cap binding complex dependent translation initiation factor [Source:HGNC Symbol;Acc:HGNC:23925]
	O43312	O43312	MTSS1	MTSS I-BAR domain containing 1 [Source:HGNC Symbol;Acc:HGNC:20443]
	O43313	O43313	ATMIN	ATM interactor [Source:HGNC Symbol;Acc:HGNC:29034]
	O43314	O43314	PPIP5K2	diphosphoinositol pentakisphosphate kinase 2 [Source:HGNC Symbol;Acc:HGNC:29035]
	O43318	O43318	MAP3K7	mitogen-activated protein kinase kinase kinase 7 [Source:HGNC Symbol;Acc:HGNC:6859]
	O43324	O43324	EEF1E1	eukaryotic translation elongation factor 1 epsilon 1 [Source:HGNC Symbol;Acc:HGNC:3212]
	O43325	O43325	LYRM1	LYR motif containing 1 [Source:HGNC Symbol;Acc:HGNC:25074]
	O43347	O43347	MSI1	musashi RNA binding protein 1 [Source:HGNC Symbol;Acc:HGNC:7330]
	O43353	O43353	RIPK2	receptor interacting serine/threonine kinase 2 [Source:HGNC Symbol;Acc:HGNC:10020]
	O43361	O43361	ZNF749	zinc finger protein 749 [Source:HGNC Symbol;Acc:HGNC:32783]
	O43365	O43365	HOXA3	homeobox A3 [Source:HGNC Symbol;Acc:HGNC:5104]
	O43374	O43374	RASA4	RAS p21 protein activator 4 [Source:HGNC Symbol;Acc:HGNC:23181]
	O43379	O43379	WDR62	WD repeat domain 62 [Source:HGNC Symbol;Acc:HGNC:24502]
	O43390	O43390	HNRNPR	heterogeneous nuclear ribonucleoprotein R [Source:HGNC Symbol;Acc:HGNC:5047]
	O43395	O43395	PRPF3	pre-mRNA processing factor 3 [Source:HGNC Symbol;Acc:HGNC:17348]
	O43396	O43396	TXNL1	thioredoxin like 1 [Source:HGNC Symbol;Acc:HGNC:12436]
	O43399	O43399	TPD52L2	TPD52 like 2 [Source:HGNC Symbol;Acc:HGNC:12007]
	O43402	O43402	EMC8	ER membrane protein complex subunit 8 [Source:HGNC Symbol;Acc:HGNC:7864]
	O43405	O43405	COCH	cochlin [Source:HGNC Symbol;Acc:HGNC:2180]
	O43414	O43414	ERI3	ERI1 exoribonuclease family member 3 [Source:HGNC Symbol;Acc:HGNC:17276]
	O43422	O43422	THAP12	THAP domain containing 12 [Source:HGNC Symbol;Acc:HGNC:9440]
	O43426	O43426	SYNJ1	synaptojanin 1 [Source:HGNC Symbol;Acc:HGNC:11503]
	O43427	O43427	FIBP	FGF1 intracellular binding protein [Source:HGNC Symbol;Acc:HGNC:3705]
	O43432	O43432	EIF4G3	eukaryotic translation initiation factor 4 gamma 3 [Source:HGNC Symbol;Acc:HGNC:3298]
	O43435	O43435	TBX1	T-box transcription factor 1 [Source:HGNC Symbol;Acc:HGNC:11592]
	O43439	O43439	CBFA2T2	CBFA2/RUNX1 partner transcriptional co-repressor 2 [Source:HGNC Symbol;Acc:HGNC:1536]
	O43447	O43447	PPIH	peptidylprolyl isomerase H [Source:HGNC Symbol;Acc:HGNC:14651]
	O43448	O43448	KCNAB3	potassium voltage-gated channel subfamily A regulatory beta subunit 3 [Source:HGNC Symbol;Acc:HGNC:6230]
	O43462	O43462	MBTPS2	membrane bound transcription factor peptidase, site 2 [Source:HGNC Symbol;Acc:HGNC:15455]
	O43463	O43463	SUV39H1	SUV39H1 histone lysine methyltransferase [Source:HGNC Symbol;Acc:HGNC:11479]
	O43464	O43464	HTRA2	HtrA serine peptidase 2 [Source:HGNC Symbol;Acc:HGNC:14348]
	O43474	O43474	KLF4	Kruppel like factor 4 [Source:HGNC Symbol;Acc:HGNC:6348]
	O43482	O43482	OIP5	Opa interacting protein 5 [Source:HGNC Symbol;Acc:HGNC:20300]
	O43488	O43488	AKR7A2	aldo-keto reductase family 7 member A2 [Source:HGNC Symbol;Acc:HGNC:389]
	O43490	O43490	PROM1	prominin 1 [Source:HGNC Symbol;Acc:HGNC:9454]
	O43491	O43491	EPB41L2	erythrocyte membrane protein band 4.1 like 2 [Source:HGNC Symbol;Acc:HGNC:3379]
	O43493	O43493	TGOLN2	trans-golgi network protein 2 [Source:HGNC Symbol;Acc:HGNC:15450]
	O43502	O43502	RAD51C	RAD51 paralog C [Source:HGNC Symbol;Acc:HGNC:9820]
	O43504	O43504	LAMTOR5	late endosomal/lysosomal adaptor, MAPK and MTOR activator 5 [Source:HGNC Symbol;Acc:HGNC:17955]
	O43505	O43505	B4GAT1	beta-1,4-glucuronyltransferase 1 [Source:HGNC Symbol;Acc:HGNC:15685]
	O43513	O43513	MED7	mediator complex subunit 7 [Source:HGNC Symbol;Acc:HGNC:2378]
	O43516	O43516	WIPF1	WAS/WASL interacting protein family member 1 [Source:HGNC Symbol;Acc:HGNC:12736]
	O43520	O43520	ATP8B1	ATPase phospholipid transporting 8B1 [Source:HGNC Symbol;Acc:HGNC:3706]
	O43521	O43521	BCL2L11	BCL2 like 11 [Source:HGNC Symbol;Acc:HGNC:994]
	O43524	O43524	FOXO3	forkhead box O3 [Source:HGNC Symbol;Acc:HGNC:3821]
	O43526	O43526	KCNQ2	potassium voltage-gated channel subfamily Q member 2 [Source:HGNC Symbol;Acc:HGNC:6296]
	O43529	O43529	CHST10	carbohydrate sulfotransferase 10 [Source:HGNC Symbol;Acc:HGNC:19650]
	O43541	O43541	SMAD6	SMAD family member 6 [Source:HGNC Symbol;Acc:HGNC:6772]
	O43542	O43542	XRCC3	X-ray repair cross complementing 3 [Source:HGNC Symbol;Acc:HGNC:12830]
	O43543	O43543	XRCC2	X-ray repair cross complementing 2 [Source:HGNC Symbol;Acc:HGNC:12829]
	O43556	O43556	SGCE	sarcoglycan epsilon [Source:HGNC Symbol;Acc:HGNC:10808]
	O43567	O43567	RNF13	ring finger protein 13 [Source:HGNC Symbol;Acc:HGNC:10057]
	O43570	O43570	CA12	carbonic anhydrase 12 [Source:HGNC Symbol;Acc:HGNC:1371]
	O43572	O43572	AKAP10	A-kinase anchoring protein 10 [Source:HGNC Symbol;Acc:HGNC:368]
	O43583	O43583	DENR	density regulated re-initiation and release factor [Source:HGNC Symbol;Acc:HGNC:2769]
	O43586	O43586	PSTPIP1	proline-serine-threonine phosphatase interacting protein 1 [Source:HGNC Symbol;Acc:HGNC:9580]
	O43592	O43592	XPOT	exportin for tRNA [Source:HGNC Symbol;Acc:HGNC:12826]
	O43593	O43593	HR	HR lysine demethylase and nuclear receptor corepressor [Source:HGNC Symbol;Acc:HGNC:5172]
	O43597	O43597	SPRY2	sprouty RTK signaling antagonist 2 [Source:HGNC Symbol;Acc:HGNC:11270]
	O43598	O43598	DNPH1	2'-deoxynucleoside 5'-phosphate N-hydrolase 1 [Source:HGNC Symbol;Acc:HGNC:21218]
	O43602	O43602	DCX	doublecortin [Source:HGNC Symbol;Acc:HGNC:2714]
	O43609	O43609	SPRY1	sprouty RTK signaling antagonist 1 [Source:HGNC Symbol;Acc:HGNC:11269]
	O43615	O43615	TIMM44	translocase of inner mitochondrial membrane 44 [Source:HGNC Symbol;Acc:HGNC:17316]
	O43617	O43617	TRAPPC3	trafficking protein particle complex subunit 3 [Source:HGNC Symbol;Acc:HGNC:19942]
	O43623	O43623	SNAI2	snail family transcriptional repressor 2 [Source:HGNC Symbol;Acc:HGNC:11094]
	O43633	O43633	CHMP2A	charged multivesicular body protein 2A [Source:HGNC Symbol;Acc:HGNC:30216]
	O43639	O43639	NCK2	NCK adaptor protein 2 [Source:HGNC Symbol;Acc:HGNC:7665]
	O43657	O43657	TSPAN6	tetraspanin 6 [Source:HGNC Symbol;Acc:HGNC:11858]
	O43660	O43660	PLRG1	pleiotropic regulator 1 [Source:HGNC Symbol;Acc:HGNC:9089]
	O43663	O43663	PRC1	protein regulator of cytokinesis 1 [Source:HGNC Symbol;Acc:HGNC:9341]
	O43665	O43665	RGS10	regulator of G protein signaling 10 [Source:HGNC Symbol;Acc:HGNC:9992]
	O43670	O43670	ZNF207	zinc finger protein 207 [Source:HGNC Symbol;Acc:HGNC:12998]
	O43674	O43674	NDUFB5	NADH:ubiquinone oxidoreductase subunit B5 [Source:HGNC Symbol;Acc:HGNC:7700]
	O43676	O43676	NDUFB3	NADH:ubiquinone oxidoreductase subunit B3 [Source:HGNC Symbol;Acc:HGNC:7698]
	O43677	O43677	NDUFC1	NADH:ubiquinone oxidoreductase subunit C1 [Source:HGNC Symbol;Acc:HGNC:7705]
	O43678	O43678	NDUFA2	NADH:ubiquinone oxidoreductase subunit A2 [Source:HGNC Symbol;Acc:HGNC:7685]
	O43679	O43679	LDB2	LIM domain binding 2 [Source:HGNC Symbol;Acc:HGNC:6533]
	O43681	O43681	GET3	guided entry of tail-anchored proteins factor 3, ATPase [Source:HGNC Symbol;Acc:HGNC:752]
	O43683	O43683	BUB1	BUB1 mitotic checkpoint serine/threonine kinase [Source:HGNC Symbol;Acc:HGNC:1148]
	O43684	O43684	BUB3	BUB3 mitotic checkpoint protein [Source:HGNC Symbol;Acc:HGNC:1151]
	O43704	O43704	SULT1B1	sulfotransferase family 1B member 1 [Source:HGNC Symbol;Acc:HGNC:17845]
	O43707	O43707	ACTN4	actinin alpha 4 [Source:HGNC Symbol;Acc:HGNC:166]
	O43709	O43709	BUD23	BUD23 rRNA methyltransferase and ribosome maturation factor [Source:HGNC Symbol;Acc:HGNC:16405]
	O43711	O43711	TLX3	T cell leukemia homeobox 3 [Source:HGNC Symbol;Acc:HGNC:13532]
	O43715	O43715	TRIAP1	TP53 regulated inhibitor of apoptosis 1 [Source:HGNC Symbol;Acc:HGNC:26937]
	O43719	O43719	HTATSF1	HIV-1 Tat specific factor 1 [Source:HGNC Symbol;Acc:HGNC:5276]
	O43734	O43734	TRAF3IP2	TRAF3 interacting protein 2 [Source:HGNC Symbol;Acc:HGNC:1343]
	O43739	O43739	CYTH3	cytohesin 3 [Source:HGNC Symbol;Acc:HGNC:9504]
	O43741	O43741	PRKAB2	protein kinase AMP-activated non-catalytic subunit beta 2 [Source:HGNC Symbol;Acc:HGNC:9379]
	O43747	O43747	AP1G1	adaptor related protein complex 1 subunit gamma 1 [Source:HGNC Symbol;Acc:HGNC:555]
	O43752	O43752	STX6	syntaxin 6 [Source:HGNC Symbol;Acc:HGNC:11441]
	O43759	O43759	SYNGR1	synaptogyrin 1 [Source:HGNC Symbol;Acc:HGNC:11498]
	O43760	O43760	SYNGR2	synaptogyrin 2 [Source:HGNC Symbol;Acc:HGNC:11499]
	O43765	O43765	SGTA	small glutamine rich tetratricopeptide repeat co-chaperone alpha [Source:HGNC Symbol;Acc:HGNC:10819]
	O43766	O43766	LIAS	lipoic acid synthetase [Source:HGNC Symbol;Acc:HGNC:16429]
	O43768	O43768	ENSA	endosulfine alpha [Source:HGNC Symbol;Acc:HGNC:3360]
	O43772	O43772	SLC25A20	solute carrier family 25 member 20 [Source:HGNC Symbol;Acc:HGNC:1421]
	O43776	O43776	NARS1	asparaginyl-tRNA synthetase 1 [Source:HGNC Symbol;Acc:HGNC:7643]
	O43791	O43791	SPOP	speckle type BTB/POZ protein [Source:HGNC Symbol;Acc:HGNC:11254]
	O43795	O43795	MYO1B	myosin IB [Source:HGNC Symbol;Acc:HGNC:7596]
	O43805	O43805	SSNA1	SS nuclear autoantigen 1 [Source:HGNC Symbol;Acc:HGNC:11321]
	O43808	O43808	SLC25A17	solute carrier family 25 member 17 [Source:HGNC Symbol;Acc:HGNC:10987]
	O43809	O43809	NUDT21	nudix hydrolase 21 [Source:HGNC Symbol;Acc:HGNC:13870]
	O43813	O43813	LANCL1	LanC like 1 [Source:HGNC Symbol;Acc:HGNC:6508]
	O43815	O43815	STRN	striatin [Source:HGNC Symbol;Acc:HGNC:11424]
	O43818	O43818	RRP9	ribosomal RNA processing 9, U3 small nucleolar RNA binding protein [Source:HGNC Symbol;Acc:HGNC:16829]
	O43819	O43819	SCO2	synthesis of cytochrome C oxidase 2 [Source:HGNC Symbol;Acc:HGNC:10604]
	O43822	O43822	CFAP410	cilia and flagella associated protein 410 [Source:HGNC Symbol;Acc:HGNC:1260]
	O43823	O43823	AKAP8	A-kinase anchoring protein 8 [Source:HGNC Symbol;Acc:HGNC:378]
	O43824	O43824	GTPBP6	GTP binding protein 6 (putative) [Source:HGNC Symbol;Acc:HGNC:30189]
	O43826	O43826	SLC37A4	Glucose-6-phosphate exchanger SLC37A4
	O43829	O43829	ZBTB14	zinc finger and BTB domain containing 14 [Source:HGNC Symbol;Acc:HGNC:12860]
	O43837	O43837	IDH3B	isocitrate dehydrogenase (NAD(+)) 3 non-catalytic subunit beta [Source:HGNC Symbol;Acc:HGNC:5385]
	O43847	O43847	NRDC	nardilysin convertase [Source:HGNC Symbol;Acc:HGNC:7995]
	O43852	O43852	CALU	calumenin [Source:HGNC Symbol;Acc:HGNC:1458]
	O43854	O43854	EDIL3	EGF like repeats and discoidin domains 3 [Source:HGNC Symbol;Acc:HGNC:3173]
	O43861	O43861	ATP9B	ATPase phospholipid transporting 9B (putative) [Source:HGNC Symbol;Acc:HGNC:13541]
	O43865	O43865	AHCYL1	adenosylhomocysteinase like 1 [Source:HGNC Symbol;Acc:HGNC:344]
	O43889	O43889	CREB3	cAMP responsive element binding protein 3 [Source:HGNC Symbol;Acc:HGNC:2347]
	O43896	O43896	KIF1C	kinesin family member 1C [Source:HGNC Symbol;Acc:HGNC:6317]
	O43897	O43897	TLL1	tolloid like 1 [Source:HGNC Symbol;Acc:HGNC:11843]
	O43900	O43900	PRICKLE3	prickle planar cell polarity protein 3 [Source:HGNC Symbol;Acc:HGNC:6645]
	O43903	O43903	GAS2	growth arrest specific 2 [Source:HGNC Symbol;Acc:HGNC:4167]
	O43909	O43909	EXTL3	exostosin like glycosyltransferase 3 [Source:HGNC Symbol;Acc:HGNC:3518]
	O43913	O43913	ORC5	origin recognition complex subunit 5 [Source:HGNC Symbol;Acc:HGNC:8491]
	O43920	O43920	NDUFS5	NADH:ubiquinone oxidoreductase subunit S5 [Source:HGNC Symbol;Acc:HGNC:7712]
	O43924	O43924	PDE6D	phosphodiesterase 6D [Source:HGNC Symbol;Acc:HGNC:8788]
	O43929	O43929	ORC4	origin recognition complex subunit 4 [Source:HGNC Symbol;Acc:HGNC:8490]
	O43933	O43933	PEX1	peroxisomal biogenesis factor 1 [Source:HGNC Symbol;Acc:HGNC:8850]
	O60216	O60216	RAD21	RAD21 cohesin complex component [Source:HGNC Symbol;Acc:HGNC:9811]
	O60218	O60218	AKR1B10	aldo-keto reductase family 1 member B10 [Source:HGNC Symbol;Acc:HGNC:382]
	O60220	O60220	TIMM8A	translocase of inner mitochondrial membrane 8A [Source:HGNC Symbol;Acc:HGNC:11817]
	O60231	O60231	DHX16	DEAH-box helicase 16 [Source:HGNC Symbol;Acc:HGNC:2739]
	O60232	O60232	ZNRD2	zinc ribbon domain containing 2 [Source:HGNC Symbol;Acc:HGNC:11328]
	O60234	O60234	GMFG	glia maturation factor gamma [Source:HGNC Symbol;Acc:HGNC:4374]
	O60235	O60235	TMPRSS11D	transmembrane serine protease 11D [Source:HGNC Symbol;Acc:HGNC:24059]
	O60237	O60237	PPP1R12B	protein phosphatase 1 regulatory subunit 12B [Source:HGNC Symbol;Acc:HGNC:7619]
	O60238	O60238	BNIP3L	BCL2 interacting protein 3 like [Source:HGNC Symbol;Acc:HGNC:1085]
	O60239	O60239	SH3BP5	SH3 domain binding protein 5 [Source:HGNC Symbol;Acc:HGNC:10827]
	O60240	O60240	PLIN1	perilipin 1 [Source:HGNC Symbol;Acc:HGNC:9076]
	O60241	O60241	ADGRB2	adhesion G protein-coupled receptor B2 [Source:HGNC Symbol;Acc:HGNC:944]
	O60242	O60242	ADGRB3	adhesion G protein-coupled receptor B3 [Source:HGNC Symbol;Acc:HGNC:945]
	O60243	O60243	HS6ST1	heparan sulfate 6-O-sulfotransferase 1 [Source:HGNC Symbol;Acc:HGNC:5201]
	O60244	O60244	MED14	mediator complex subunit 14 [Source:HGNC Symbol;Acc:HGNC:2370]
	O60245	O60245	PCDH7	protocadherin 7 [Source:HGNC Symbol;Acc:HGNC:8659]
	O60256	O60256	PRPSAP2	phosphoribosyl pyrophosphate synthetase associated protein 2 [Source:HGNC Symbol;Acc:HGNC:9467]
	O60259	O60259	KLK8	kallikrein related peptidase 8 [Source:HGNC Symbol;Acc:HGNC:6369]
	O60262	O60262	GNG7	G protein subunit gamma 7 [Source:HGNC Symbol;Acc:HGNC:4410]
	O60264	O60264	SMARCA5	SWI/SNF related, matrix associated, actin dependent regulator of chromatin, subfamily a, member 5 [Source:HGNC Symbol;Acc:HGNC:11101]
	O60266	O60266	ADCY3	adenylate cyclase 3 [Source:HGNC Symbol;Acc:HGNC:234]
	O60268	O60268	KIAA0513	KIAA0513 [Source:HGNC Symbol;Acc:HGNC:29058]
	O60269	O60269	GPRIN2	G protein regulated inducer of neurite outgrowth 2 [Source:HGNC Symbol;Acc:HGNC:23730]
	O60271	O60271	SPAG9	sperm associated antigen 9 [Source:HGNC Symbol;Acc:HGNC:14524]
	O60279	O60279	SUSD5	sushi domain containing 5 [Source:HGNC Symbol;Acc:HGNC:29061]
	O60281	O60281	ZNF292	zinc finger protein 292 [Source:HGNC Symbol;Acc:HGNC:18410]
	O60282	O60282	KIF5C	kinesin family member 5C [Source:HGNC Symbol;Acc:HGNC:6325]
	O60285	O60285	NUAK1	NUAK family kinase 1 [Source:HGNC Symbol;Acc:HGNC:14311]
	O60287	O60287	URB1	URB1 ribosome biogenesis homolog [Source:HGNC Symbol;Acc:HGNC:17344]
	O60290	O60290	ZNF862	zinc finger protein 862 [Source:HGNC Symbol;Acc:HGNC:34519]
	O60291	O60291	MGRN1	mahogunin ring finger 1 [Source:HGNC Symbol;Acc:HGNC:20254]
	O60292	O60292	SIPA1L3	signal induced proliferation associated 1 like 3 [Source:HGNC Symbol;Acc:HGNC:23801]
	O60293	O60293	ZFC3H1	zinc finger C3H1-type containing [Source:HGNC Symbol;Acc:HGNC:28328]
	O60294	O60294	LCMT2	leucine carboxyl methyltransferase 2 [Source:HGNC Symbol;Acc:HGNC:17558]
	O60296	O60296	TRAK2	trafficking kinesin protein 2 [Source:HGNC Symbol;Acc:HGNC:13206]
	O60299	O60299	LZTS3	leucine zipper tumor suppressor family member 3 [Source:HGNC Symbol;Acc:HGNC:30139]
	O60303	O60303	KATNIP	katanin interacting protein [Source:HGNC Symbol;Acc:HGNC:29068]
	O60304	O60304	ZNF500	zinc finger protein 500 [Source:HGNC Symbol;Acc:HGNC:23716]
	O60306	O60306	AQR	aquarius intron-binding spliceosomal factor [Source:HGNC Symbol;Acc:HGNC:29513]
	O60307	O60307	MAST3	microtubule associated serine/threonine kinase 3 [Source:HGNC Symbol;Acc:HGNC:19036]
	O60308	O60308	CEP104	centrosomal protein 104 [Source:HGNC Symbol;Acc:HGNC:24866]
	O60313	O60313	OPA1	OPA1 mitochondrial dynamin like GTPase [Source:HGNC Symbol;Acc:HGNC:8140]
	O60315	O60315	ZEB2	zinc finger E-box binding homeobox 2 [Source:HGNC Symbol;Acc:HGNC:14881]
	O60318	O60318	MCM3AP	minichromosome maintenance complex component 3 associated protein [Source:HGNC Symbol;Acc:HGNC:6946]
	O60331	O60331	PIP5K1C	phosphatidylinositol-4-phosphate 5-kinase type 1 gamma [Source:HGNC Symbol;Acc:HGNC:8996]
	O60333	O60333	KIF1B	kinesin family member 1B [Source:HGNC Symbol;Acc:HGNC:16636]
	O60336	O60336	MAPKBP1	mitogen-activated protein kinase binding protein 1 [Source:HGNC Symbol;Acc:HGNC:29536]
	O60337	O60337	MARCHF6	membrane associated ring-CH-type finger 6 [Source:HGNC Symbol;Acc:HGNC:30550]
	O60341	O60341	KDM1A	lysine demethylase 1A [Source:HGNC Symbol;Acc:HGNC:29079]
	O60343	O60343	TBC1D4	TBC1 domain family member 4 [Source:HGNC Symbol;Acc:HGNC:19165]
	O60344	P0DPD6	ECE2	Endothelin-converting enzyme 2
	O60346	O60346	PHLPP1	PH domain and leucine rich repeat protein phosphatase 1 [Source:HGNC Symbol;Acc:HGNC:20610]
	O60347	O60347	TBC1D12	TBC1 domain family member 12 [Source:HGNC Symbol;Acc:HGNC:29082]
	O60353	O60353	FZD6	frizzled class receptor 6 [Source:HGNC Symbol;Acc:HGNC:4044]
	O60381	O60381	HBP1	HMG-box transcription factor 1 [Source:HGNC Symbol;Acc:HGNC:23200]
	O60422	O60422	ONECUT3	one cut homeobox 3 [Source:HGNC Symbol;Acc:HGNC:13399]
	O60437	O60437	PPL	periplakin [Source:HGNC Symbol;Acc:HGNC:9273]
	O60443	O60443	GSDME	gasdermin E [Source:HGNC Symbol;Acc:HGNC:2810]
	O60447	O60447	EVI5	ecotropic viral integration site 5 [Source:HGNC Symbol;Acc:HGNC:3501]
	O60449	O60449	LY75	lymphocyte antigen 75 [Source:HGNC Symbol;Acc:HGNC:6729]
	O60462	O60462	NRP2	neuropilin 2 [Source:HGNC Symbol;Acc:HGNC:8005]
	O60476	O60476	MAN1A2	mannosidase alpha class 1A member 2 [Source:HGNC Symbol;Acc:HGNC:6822]
	O60478	O60478	GPR137B	G protein-coupled receptor 137B [Source:HGNC Symbol;Acc:HGNC:11862]
	O60479	O60479	DLX3	distal-less homeobox 3 [Source:HGNC Symbol;Acc:HGNC:2916]
	O60481	O60481	ZIC3	Zic family member 3 [Source:HGNC Symbol;Acc:HGNC:12874]
	O60486	O60486	PLXNC1	plexin C1 [Source:HGNC Symbol;Acc:HGNC:9106]
	O60487	O60487	MPZL2	myelin protein zero like 2 [Source:HGNC Symbol;Acc:HGNC:3496]
	O60488	O60488	ACSL4	acyl-CoA synthetase long chain family member 4 [Source:HGNC Symbol;Acc:HGNC:3571]
	O60493	O60493	SNX3	sorting nexin 3 [Source:HGNC Symbol;Acc:HGNC:11174]
	O60499	O60499	STX10	syntaxin 10 [Source:HGNC Symbol;Acc:HGNC:11428]
	O60502	O60502	OGA	O-GlcNAcase [Source:HGNC Symbol;Acc:HGNC:7056]
	O60503	O60503	ADCY9	adenylate cyclase 9 [Source:HGNC Symbol;Acc:HGNC:240]
	O60504	O60504	SORBS3	sorbin and SH3 domain containing 3 [Source:HGNC Symbol;Acc:HGNC:30907]
	O60506	O60506	SYNCRIP	synaptotagmin binding cytoplasmic RNA interacting protein [Source:HGNC Symbol;Acc:HGNC:16918]
	O60507	O60507	TPST1	tyrosylprotein sulfotransferase 1 [Source:HGNC Symbol;Acc:HGNC:12020]
	O60508	O60508	CDC40	cell division cycle 40 [Source:HGNC Symbol;Acc:HGNC:17350]
	O60512	O60512	B4GALT3	beta-1,4-galactosyltransferase 3 [Source:HGNC Symbol;Acc:HGNC:926]
	O60513	O60513	B4GALT4	beta-1,4-galactosyltransferase 4 [Source:HGNC Symbol;Acc:HGNC:927]
	O60518	O60518	RANBP6	RAN binding protein 6 [Source:HGNC Symbol;Acc:HGNC:9851]
	O60524	O60524	NEMF	nuclear export mediator factor [Source:HGNC Symbol;Acc:HGNC:10663]
	O60547	O60547	GMDS	GDP-mannose 4,6-dehydratase [Source:HGNC Symbol;Acc:HGNC:4369]
	O60548	O60548	FOXD2	forkhead box D2 [Source:HGNC Symbol;Acc:HGNC:3803]
	O60551	O60551	NMT2	N-myristoyltransferase 2 [Source:HGNC Symbol;Acc:HGNC:7858]
	O60563	O60563	CCNT1	cyclin T1 [Source:HGNC Symbol;Acc:HGNC:1599]
	O60566	O60566	BUB1B	BUB1 mitotic checkpoint serine/threonine kinase B [Source:HGNC Symbol;Acc:HGNC:1149]
	O60568	O60568	PLOD3	procollagen-lysine,2-oxoglutarate 5-dioxygenase 3 [Source:HGNC Symbol;Acc:HGNC:9083]
	O60573	O60573	EIF4E2	eukaryotic translation initiation factor 4E family member 2 [Source:HGNC Symbol;Acc:HGNC:3293]
	O60583	O60583	CCNT2	cyclin T2 [Source:HGNC Symbol;Acc:HGNC:1600]
	O60603	O60603	TLR2	toll like receptor 2 [Source:HGNC Symbol;Acc:HGNC:11848]
	O60609	O60609	GFRA3	GDNF family receptor alpha 3 [Source:HGNC Symbol;Acc:HGNC:4245]
	O60610	O60610	DIAPH1	diaphanous related formin 1 [Source:HGNC Symbol;Acc:HGNC:2876]
	O60613	O60613	SELENOF	selenoprotein F [Source:HGNC Symbol;Acc:HGNC:17705]
	O60641	O60641	SNAP91	synaptosome associated protein 91 [Source:HGNC Symbol;Acc:HGNC:14986]
	O60645	O60645	EXOC3	exocyst complex component 3 [Source:HGNC Symbol;Acc:HGNC:30378]
	O60656	O60656	UGT1A9	UDP glucuronosyltransferase family 1 member A9 [Source:HGNC Symbol;Acc:HGNC:12541]
	O60658	O60658	PDE8A	phosphodiesterase 8A [Source:HGNC Symbol;Acc:HGNC:8793]
	O60662	O60662	KLHL41	kelch like family member 41 [Source:HGNC Symbol;Acc:HGNC:16905]
	O60663	O60663	LMX1B	LIM homeobox transcription factor 1 beta [Source:HGNC Symbol;Acc:HGNC:6654]
	O60664	O60664	PLIN3	perilipin 3 [Source:HGNC Symbol;Acc:HGNC:16893]
	O60669	O60669	SLC16A7	solute carrier family 16 member 7 [Source:HGNC Symbol;Acc:HGNC:10928]
	O60671	O60671	RAD1	RAD1 checkpoint DNA exonuclease [Source:HGNC Symbol;Acc:HGNC:9806]
	O60673	O60673	REV3L	REV3 like, DNA directed polymerase zeta catalytic subunit [Source:HGNC Symbol;Acc:HGNC:9968]
	O60674	O60674	JAK2	Janus kinase 2 [Source:HGNC Symbol;Acc:HGNC:6192]
	O60675	O60675	MAFK	MAF bZIP transcription factor K [Source:HGNC Symbol;Acc:HGNC:6782]
	O60678	O60678	PRMT3	protein arginine methyltransferase 3 [Source:HGNC Symbol;Acc:HGNC:30163]
	O60683	O60683	PEX10	peroxisomal biogenesis factor 10 [Source:HGNC Symbol;Acc:HGNC:8851]
	O60684	O60684	KPNA6	karyopherin subunit alpha 6 [Source:HGNC Symbol;Acc:HGNC:6399]
	O60701	O60701	UGDH	UDP-glucose 6-dehydrogenase [Source:HGNC Symbol;Acc:HGNC:12525]
	O60704	O60704	TPST2	tyrosylprotein sulfotransferase 2 [Source:HGNC Symbol;Acc:HGNC:12021]
	O60706	O60706	ABCC9	ATP binding cassette subfamily C member 9 [Source:HGNC Symbol;Acc:HGNC:60]
	O60711	O60711	LPXN	leupaxin [Source:HGNC Symbol;Acc:HGNC:14061]
	O60716	O60716	CTNND1	catenin delta 1 [Source:HGNC Symbol;Acc:HGNC:2515]
	O60725	O60725	ICMT	isoprenylcysteine carboxyl methyltransferase [Source:HGNC Symbol;Acc:HGNC:5350]
	O60729	O60729	CDC14B	cell division cycle 14B [Source:HGNC Symbol;Acc:HGNC:1719]
	O60733	O60733	PLA2G6	phospholipase A2 group VI [Source:HGNC Symbol;Acc:HGNC:9039]
	O60739	O60739	EIF1B	eukaryotic translation initiation factor 1B [Source:HGNC Symbol;Acc:HGNC:30792]
	O60749	O60749	SNX2	sorting nexin 2 [Source:HGNC Symbol;Acc:HGNC:11173]
	O60762	O60762	DPM1	dolichyl-phosphate mannosyltransferase subunit 1, catalytic [Source:HGNC Symbol;Acc:HGNC:3005]
	O60763	O60763	USO1	USO1 vesicle transport factor [Source:HGNC Symbol;Acc:HGNC:30904]
	O60765	O60765	ZNF354A	zinc finger protein 354A [Source:HGNC Symbol;Acc:HGNC:11628]
	O60779	O60779	SLC19A2	solute carrier family 19 member 2 [Source:HGNC Symbol;Acc:HGNC:10938]
	O60783	O60783	MRPS14	mitochondrial ribosomal protein S14 [Source:HGNC Symbol;Acc:HGNC:14049]
	O60784	O60784	TOM1	target of myb1 membrane trafficking protein [Source:HGNC Symbol;Acc:HGNC:11982]
	O60812	O60812	HNRNPCL1	heterogeneous nuclear ribonucleoprotein C like 1 [Source:HGNC Symbol;Acc:HGNC:29295]
	O60814	O60814	H2BC12	H2B clustered histone 12 [Source:HGNC Symbol;Acc:HGNC:13954]
	O60825	O60825	PFKFB2	6-phosphofructo-2-kinase/fructose-2,6-biphosphatase 2 [Source:HGNC Symbol;Acc:HGNC:8873]
	O60826	O60826	CCDC22	coiled-coil domain containing 22 [Source:HGNC Symbol;Acc:HGNC:28909]
	O60828	O60828	PQBP1	polyglutamine binding protein 1 [Source:HGNC Symbol;Acc:HGNC:9330]
	O60830	O60830	TIMM17B	translocase of inner mitochondrial membrane 17B [Source:HGNC Symbol;Acc:HGNC:17310]
	O60831	O60831	PRAF2	PRA1 domain family member 2 [Source:HGNC Symbol;Acc:HGNC:28911]
	O60832	O60832	DKC1	dyskerin pseudouridine synthase 1 [Source:HGNC Symbol;Acc:HGNC:2890]
	O60841	O60841	EIF5B	eukaryotic translation initiation factor 5B [Source:HGNC Symbol;Acc:HGNC:30793]
	O60858	O60858	TRIM13	tripartite motif containing 13 [Source:HGNC Symbol;Acc:HGNC:9976]
	O60861	O60861	GAS7	growth arrest specific 7 [Source:HGNC Symbol;Acc:HGNC:4169]
	O60869	O60869	EDF1	endothelial differentiation related factor 1 [Source:HGNC Symbol;Acc:HGNC:3164]
	O60870	O60870	KIN	Kin17 DNA and RNA binding protein [Source:HGNC Symbol;Acc:HGNC:6327]
	O60884	O60884	DNAJA2	DnaJ heat shock protein family (Hsp40) member A2 [Source:HGNC Symbol;Acc:HGNC:14884]
	O60885	O60885	BRD4	bromodomain containing 4 [Source:HGNC Symbol;Acc:HGNC:13575]
	O60888	O60888	CUTA	cutA divalent cation tolerance homolog [Source:HGNC Symbol;Acc:HGNC:21101]
	O60890	O60890	OPHN1	oligophrenin 1 [Source:HGNC Symbol;Acc:HGNC:8148]
	O60902	O60902	SHOX2	short stature homeobox 2 [Source:HGNC Symbol;Acc:HGNC:10854]
	O60906	O60906	SMPD2	sphingomyelin phosphodiesterase 2 [Source:HGNC Symbol;Acc:HGNC:11121]
	O60907	O60907	TBL1X	transducin beta like 1 X-linked [Source:HGNC Symbol;Acc:HGNC:11585]
	O60911	O60911	CTSV	cathepsin V [Source:HGNC Symbol;Acc:HGNC:2538]
	O60921	O60921	HUS1	HUS1 checkpoint clamp component [Source:HGNC Symbol;Acc:HGNC:5309]
	O60925	O60925	PFDN1	prefoldin subunit 1 [Source:HGNC Symbol;Acc:HGNC:8866]
	O60927	O60927	PPP1R11	protein phosphatase 1 regulatory inhibitor subunit 11 [Source:HGNC Symbol;Acc:HGNC:9285]
	O60930	O60930	RNASEH1	ribonuclease H1 [Source:HGNC Symbol;Acc:HGNC:18466]
	O60931	O60931	CTNS	cystinosin, lysosomal cystine transporter [Source:HGNC Symbol;Acc:HGNC:2518]
	O60934	O60934	NBN	nibrin [Source:HGNC Symbol;Acc:HGNC:7652]
	O60936	O60936	NOL3	nucleolar protein 3 [Source:HGNC Symbol;Acc:HGNC:7869]
	O60941	O60941	DTNB	dystrobrevin beta [Source:HGNC Symbol;Acc:HGNC:3058]
	O60942	O60942	RNGTT	RNA guanylyltransferase and 5'-phosphatase [Source:HGNC Symbol;Acc:HGNC:10073]
	O75027	O75027	ABCB7	ATP binding cassette subfamily B member 7 [Source:HGNC Symbol;Acc:HGNC:48]
	O75030	O75030	MITF	melanocyte inducing transcription factor [Source:HGNC Symbol;Acc:HGNC:7105]
	O75037	O75037	KIF21B	kinesin family member 21B [Source:HGNC Symbol;Acc:HGNC:29442]
	O75044	O75044	SRGAP2	SLIT-ROBO Rho GTPase activating protein 2 [Source:HGNC Symbol;Acc:HGNC:19751]
	O75051	O75051	PLXNA2	plexin A2 [Source:HGNC Symbol;Acc:HGNC:9100]
	O75052	O75052	NOS1AP	nitric oxide synthase 1 adaptor protein [Source:HGNC Symbol;Acc:HGNC:16859]
	O75054	O75054	IGSF3	immunoglobulin superfamily member 3 [Source:HGNC Symbol;Acc:HGNC:5950]
	O75056	O75056	SDC3	syndecan 3 [Source:HGNC Symbol;Acc:HGNC:10660]
	O75061	O75061	DNAJC6	DnaJ heat shock protein family (Hsp40) member C6 [Source:HGNC Symbol;Acc:HGNC:15469]
	O75063	O75063	FAM20B	FAM20B glycosaminoglycan xylosylkinase [Source:HGNC Symbol;Acc:HGNC:23017]
	O75064	O75064	DENND4B	DENN domain containing 4B [Source:HGNC Symbol;Acc:HGNC:29044]
	O75069	O75069	TMCC2	transmembrane and coiled-coil domain family 2 [Source:HGNC Symbol;Acc:HGNC:24239]
	O75071	O75071	EFCAB14	EF-hand calcium binding domain 14 [Source:HGNC Symbol;Acc:HGNC:29051]
	O75072	O75072	FKTN	fukutin [Source:HGNC Symbol;Acc:HGNC:3622]
	O75077	O75077	ADAM23	ADAM metallopeptidase domain 23 [Source:HGNC Symbol;Acc:HGNC:202]
	O75078	O75078	ADAM11	ADAM metallopeptidase domain 11 [Source:HGNC Symbol;Acc:HGNC:189]
	O75081	O75081	CBFA2T3	CBFA2/RUNX1 partner transcriptional co-repressor 3 [Source:HGNC Symbol;Acc:HGNC:1537]
	O75083	O75083	WDR1	WD repeat domain 1 [Source:HGNC Symbol;Acc:HGNC:12754]
	O75084	O75084	FZD7	frizzled class receptor 7 [Source:HGNC Symbol;Acc:HGNC:4045]
	O75093	O75093	SLIT1	slit guidance ligand 1 [Source:HGNC Symbol;Acc:HGNC:11085]
	O75094	O75094	SLIT3	slit guidance ligand 3 [Source:HGNC Symbol;Acc:HGNC:11087]
	O75096	O75096	LRP4	LDL receptor related protein 4 [Source:HGNC Symbol;Acc:HGNC:6696]
	O75110	O75110	ATP9A	ATPase phospholipid transporting 9A (putative) [Source:HGNC Symbol;Acc:HGNC:13540]
	O75113	O75113	N4BP1	NEDD4 binding protein 1 [Source:HGNC Symbol;Acc:HGNC:29850]
	O75116	O75116	ROCK2	Rho associated coiled-coil containing protein kinase 2 [Source:HGNC Symbol;Acc:HGNC:10252]
	O75121	O75121	MFAP3L	microfibril associated protein 3 like [Source:HGNC Symbol;Acc:HGNC:29083]
	O75122	O75122	CLASP2	cytoplasmic linker associated protein 2 [Source:HGNC Symbol;Acc:HGNC:17078]
	O75127	O75127	PTCD1	pentatricopeptide repeat domain 1 [Source:HGNC Symbol;Acc:HGNC:22198]
	O75128	O75128	COBL	cordon-bleu WH2 repeat protein [Source:HGNC Symbol;Acc:HGNC:22199]
	O75129	O75129	ASTN2	astrotactin 2 [Source:HGNC Symbol;Acc:HGNC:17021]
	O75131	O75131	CPNE3	copine 3 [Source:HGNC Symbol;Acc:HGNC:2316]
	O75132	O75132	ZBED4	zinc finger BED-type containing 4 [Source:HGNC Symbol;Acc:HGNC:20721]
	O75140	O75140	DEPDC5	DEP domain containing 5, GATOR1 subcomplex subunit [Source:HGNC Symbol;Acc:HGNC:18423]
	O75143	O75143	ATG13	autophagy related 13 [Source:HGNC Symbol;Acc:HGNC:29091]
	O75145	O75145	PPFIA3	PTPRF interacting protein alpha 3 [Source:HGNC Symbol;Acc:HGNC:9247]
	O75146	O75146	HIP1R	huntingtin interacting protein 1 related [Source:HGNC Symbol;Acc:HGNC:18415]
	O75147	O75147	OBSL1	obscurin like cytoskeletal adaptor 1 [Source:HGNC Symbol;Acc:HGNC:29092]
	O75150	O75150	RNF40	ring finger protein 40 [Source:HGNC Symbol;Acc:HGNC:16867]
	O75151	O75151	PHF2	PHD finger protein 2 [Source:HGNC Symbol;Acc:HGNC:8920]
	O75152	O75152	ZC3H11A	zinc finger CCCH-type containing 11A [Source:HGNC Symbol;Acc:HGNC:29093]
	O75153	O75153	CLUH	clustered mitochondria homolog [Source:HGNC Symbol;Acc:HGNC:29094]
	O75154	O75154	RAB11FIP3	RAB11 family interacting protein 3 [Source:HGNC Symbol;Acc:HGNC:17224]
	O75155	O75155	CAND2	cullin associated and neddylation dissociated 2 (putative) [Source:HGNC Symbol;Acc:HGNC:30689]
	O75157	O75157	TSC22D2	TSC22 domain family member 2 [Source:HGNC Symbol;Acc:HGNC:29095]
	O75161	O75161	NPHP4	nephrocystin 4 [Source:HGNC Symbol;Acc:HGNC:19104]
	O75164	O75164	KDM4A	lysine demethylase 4A [Source:HGNC Symbol;Acc:HGNC:22978]
	O75165	O75165	DNAJC13	DnaJ heat shock protein family (Hsp40) member C13 [Source:HGNC Symbol;Acc:HGNC:30343]
	O75170	O75170	PPP6R2	protein phosphatase 6 regulatory subunit 2 [Source:HGNC Symbol;Acc:HGNC:19253]
	O75173	O75173	ADAMTS4	ADAM metallopeptidase with thrombospondin type 1 motif 4 [Source:HGNC Symbol;Acc:HGNC:220]
	O75175	O75175	CNOT3	CCR4-NOT transcription complex subunit 3 [Source:HGNC Symbol;Acc:HGNC:7879]
	O75177	O75177	SS18L1	SS18L1 subunit of BAF chromatin remodeling complex [Source:HGNC Symbol;Acc:HGNC:15592]
	O75179	O75179	ANKRD17	ankyrin repeat domain 17 [Source:HGNC Symbol;Acc:HGNC:23575]
	O75182	O75182	SIN3B	SIN3 transcription regulator family member B [Source:HGNC Symbol;Acc:HGNC:19354]
	O75190	O75190	DNAJB6	DnaJ heat shock protein family (Hsp40) member B6 [Source:HGNC Symbol;Acc:HGNC:14888]
	O75191	O75191	XYLB	xylulokinase [Source:HGNC Symbol;Acc:HGNC:12839]
	O75192	O75192	PEX11A	peroxisomal biogenesis factor 11 alpha [Source:HGNC Symbol;Acc:HGNC:8852]
	O75197	O75197	LRP5	LDL receptor related protein 5 [Source:HGNC Symbol;Acc:HGNC:6697]
	O75204	O75204	TMEM127	transmembrane protein 127 [Source:HGNC Symbol;Acc:HGNC:26038]
	O75208	O75208	COQ9	coenzyme Q9 [Source:HGNC Symbol;Acc:HGNC:25302]
	O75223	O75223	GGCT	gamma-glutamylcyclotransferase [Source:HGNC Symbol;Acc:HGNC:21705]
	O75251	O75251	NDUFS7	NADH:ubiquinone oxidoreductase core subunit S7 [Source:HGNC Symbol;Acc:HGNC:7714]
	O75290	O75290	ZNF780A	zinc finger protein 780A [Source:HGNC Symbol;Acc:HGNC:27603]
	O75298	O75298	RTN2	reticulon 2 [Source:HGNC Symbol;Acc:HGNC:10468]
	O75306	O75306	NDUFS2	NADH:ubiquinone oxidoreductase core subunit S2 [Source:HGNC Symbol;Acc:HGNC:7708]
	O75312	O75312	ZPR1	ZPR1 zinc finger [Source:HGNC Symbol;Acc:HGNC:13051]
	O75317	O75317	USP12	ubiquitin specific peptidase 12 [Source:HGNC Symbol;Acc:HGNC:20485]
	O75319	O75319	DUSP11	dual specificity phosphatase 11 [Source:HGNC Symbol;Acc:HGNC:3066]
	O75323	O75323	NIPSNAP2	nipsnap homolog 2 [Source:HGNC Symbol;Acc:HGNC:4179]
	O75324	O75324	SNN	stannin [Source:HGNC Symbol;Acc:HGNC:11149]
	O75326	O75326	SEMA7A	semaphorin 7A (John Milton Hagen blood group) [Source:HGNC Symbol;Acc:HGNC:10741]
	O75330	O75330	HMMR	hyaluronan mediated motility receptor [Source:HGNC Symbol;Acc:HGNC:5012]
	O75334	O75334	PPFIA2	PTPRF interacting protein alpha 2 [Source:HGNC Symbol;Acc:HGNC:9246]
	O75335	O75335	PPFIA4	PTPRF interacting protein alpha 4 [Source:HGNC Symbol;Acc:HGNC:9248]
	O75339	O75339	CILP	cartilage intermediate layer protein [Source:HGNC Symbol;Acc:HGNC:1980]
	O75340	O75340	PDCD6	programmed cell death 6 [Source:HGNC Symbol;Acc:HGNC:8765]
	O75342	O75342	ALOX12B	arachidonate 12-lipoxygenase, 12R type [Source:HGNC Symbol;Acc:HGNC:430]
	O75346	O75346	ZNF253	zinc finger protein 253 [Source:HGNC Symbol;Acc:HGNC:13497]
	O75347	O75347	TBCA	tubulin folding cofactor A [Source:HGNC Symbol;Acc:HGNC:11579]
	O75348	O75348	ATP6V1G1	ATPase H+ transporting V1 subunit G1 [Source:HGNC Symbol;Acc:HGNC:864]
	O75351	O75351	VPS4B	vacuolar protein sorting 4 homolog B [Source:HGNC Symbol;Acc:HGNC:10895]
	O75352	O75352	MPDU1	mannose-P-dolichol utilization defect 1 [Source:HGNC Symbol;Acc:HGNC:7207]
	O75354	O75354	ENTPD6	ectonucleoside triphosphate diphosphohydrolase 6 [Source:HGNC Symbol;Acc:HGNC:3368]
	O75355	O75355	ENTPD3	ectonucleoside triphosphate diphosphohydrolase 3 [Source:HGNC Symbol;Acc:HGNC:3365]
	O75356	O75356	ENTPD5	ectonucleoside triphosphate diphosphohydrolase 5 (inactive) [Source:HGNC Symbol;Acc:HGNC:3367]
	O75362	O75362	ZNF217	zinc finger protein 217 [Source:HGNC Symbol;Acc:HGNC:13009]
	O75363	O75363	BCAS1	brain enriched myelin associated protein 1 [Source:HGNC Symbol;Acc:HGNC:974]
	O75365	O75365	PTP4A3	protein tyrosine phosphatase 4A3 [Source:HGNC Symbol;Acc:HGNC:9636]
	O75366	O75366	AVIL	advillin [Source:HGNC Symbol;Acc:HGNC:14188]
	O75367	O75367	MACROH2A1	macroH2A.1 histone [Source:HGNC Symbol;Acc:HGNC:4740]
	O75368	O75368	SH3BGRL	SH3 domain binding glutamate rich protein like [Source:HGNC Symbol;Acc:HGNC:10823]
	O75369	O75369	FLNB	filamin B [Source:HGNC Symbol;Acc:HGNC:3755]
	O75373	O75373	ZNF737	zinc finger protein 737 [Source:HGNC Symbol;Acc:HGNC:32468]
	O75376	O75376	NCOR1	nuclear receptor corepressor 1 [Source:HGNC Symbol;Acc:HGNC:7672]
	O75379	O75379	VAMP4	vesicle associated membrane protein 4 [Source:HGNC Symbol;Acc:HGNC:12645]
	O75380	O75380	NDUFS6	NADH:ubiquinone oxidoreductase subunit S6 [Source:HGNC Symbol;Acc:HGNC:7713]
	O75381	O75381	PEX14	peroxisomal biogenesis factor 14 [Source:HGNC Symbol;Acc:HGNC:8856]
	O75382	O75382	TRIM3	tripartite motif containing 3 [Source:HGNC Symbol;Acc:HGNC:10064]
	O75385	O75385	ULK1	unc-51 like autophagy activating kinase 1 [Source:HGNC Symbol;Acc:HGNC:12558]
	O75386	O75386	TULP3	TUB like protein 3 [Source:HGNC Symbol;Acc:HGNC:12425]
	O75387	O75387	SLC43A1	solute carrier family 43 member 1 [Source:HGNC Symbol;Acc:HGNC:9225]
	O75390	O75390	CS	citrate synthase [Source:HGNC Symbol;Acc:HGNC:2422]
	O75391	O75391	SPAG7	sperm associated antigen 7 [Source:HGNC Symbol;Acc:HGNC:11216]
	O75394	O75394	MRPL33	mitochondrial ribosomal protein L33 [Source:HGNC Symbol;Acc:HGNC:14487]
	O75396	O75396	SEC22B	SEC22 homolog B, vesicle trafficking protein [Source:HGNC Symbol;Acc:HGNC:10700]
	O75398	O75398	DEAF1	DEAF1 transcription factor [Source:HGNC Symbol;Acc:HGNC:14677]
	O75400	O75400	PRPF40A	pre-mRNA processing factor 40 homolog A [Source:HGNC Symbol;Acc:HGNC:16463]
	O75410	O75410	TACC1	transforming acidic coiled-coil containing protein 1 [Source:HGNC Symbol;Acc:HGNC:11522]
	O75417	O75417	POLQ	DNA polymerase theta [Source:HGNC Symbol;Acc:HGNC:9186]
	O75419	O75419	CDC45	cell division cycle 45 [Source:HGNC Symbol;Acc:HGNC:1739]
	O75420	O75420	GIGYF1	GRB10 interacting GYF protein 1 [Source:HGNC Symbol;Acc:HGNC:9126]
	O75427	O75427	LRCH4	leucine rich repeats and calponin homology domain containing 4 [Source:HGNC Symbol;Acc:HGNC:6691]
	O75431	O75431	MTX2	metaxin 2 [Source:HGNC Symbol;Acc:HGNC:7506]
	O75436	O75436	VPS26A	VPS26, retromer complex component A [Source:HGNC Symbol;Acc:HGNC:12711]
	O75438	O75438	NDUFB1	NADH:ubiquinone oxidoreductase subunit B1 [Source:HGNC Symbol;Acc:HGNC:7695]
	O75439	O75439	PMPCB	peptidase, mitochondrial processing subunit beta [Source:HGNC Symbol;Acc:HGNC:9119]
	O75446	O75446	SAP30	Sin3A associated protein 30 [Source:HGNC Symbol;Acc:HGNC:10532]
	O75449	O75449	KATNA1	katanin catalytic subunit A1 [Source:HGNC Symbol;Acc:HGNC:6216]
	O75459	O75459	PAGE1	PAGE family member 1 [Source:HGNC Symbol;Acc:HGNC:4107]
	O75460	O75460	ERN1	endoplasmic reticulum to nucleus signaling 1 [Source:HGNC Symbol;Acc:HGNC:3449]
	O75461	O75461	E2F6	E2F transcription factor 6 [Source:HGNC Symbol;Acc:HGNC:3120]
	O75462	O75462	CRLF1	cytokine receptor like factor 1 [Source:HGNC Symbol;Acc:HGNC:2364]
	O75467	O75467	ZNF324	zinc finger protein 324 [Source:HGNC Symbol;Acc:HGNC:14096]
	O75473	O75473	LGR5	leucine rich repeat containing G protein-coupled receptor 5 [Source:HGNC Symbol;Acc:HGNC:4504]
	O75474	O75474	FRAT2	FRAT regulator of WNT signaling pathway 2 [Source:HGNC Symbol;Acc:HGNC:16048]
	O75475	O75475	PSIP1	PC4 and SFRS1 interacting protein 1 [Source:HGNC Symbol;Acc:HGNC:9527]
	O75477	O75477	ERLIN1	ER lipid raft associated 1 [Source:HGNC Symbol;Acc:HGNC:16947]
	O75486	O75486	SUPT3H	SPT3 homolog, SAGA and STAGA complex component [Source:HGNC Symbol;Acc:HGNC:11466]
	O75487	O75487	GPC4	glypican 4 [Source:HGNC Symbol;Acc:HGNC:4452]
	O75489	O75489	NDUFS3	NADH:ubiquinone oxidoreductase core subunit S3 [Source:HGNC Symbol;Acc:HGNC:7710]
	O75494	O75494	SRSF10	serine and arginine rich splicing factor 10 [Source:HGNC Symbol;Acc:HGNC:16713]
	O75496	O75496	GMNN	geminin DNA replication inhibitor [Source:HGNC Symbol;Acc:HGNC:17493]
	O75503	O75503	CLN5	CLN5 intracellular trafficking protein [Source:HGNC Symbol;Acc:HGNC:2076]
	O75506	O75506	HSBP1	heat shock factor binding protein 1 [Source:HGNC Symbol;Acc:HGNC:5203]
	O75509	O75509	TNFRSF21	TNF receptor superfamily member 21 [Source:HGNC Symbol;Acc:HGNC:13469]
	O75521	O75521	ECI2	enoyl-CoA delta isomerase 2 [Source:HGNC Symbol;Acc:HGNC:14601]
	O75525	O75525	KHDRBS3	KH RNA binding domain containing, signal transduction associated 3 [Source:HGNC Symbol;Acc:HGNC:18117]
	O75528	O75528	TADA3	transcriptional adaptor 3 [Source:HGNC Symbol;Acc:HGNC:19422]
	O75529	O75529	TAF5L	TATA-box binding protein associated factor 5 like [Source:HGNC Symbol;Acc:HGNC:17304]
	O75530	O75530	EED	embryonic ectoderm development [Source:HGNC Symbol;Acc:HGNC:3188]
	O75531	O75531	BANF1	BAF nuclear assembly factor 1 [Source:HGNC Symbol;Acc:HGNC:17397]
	O75533	O75533	SF3B1	splicing factor 3b subunit 1 [Source:HGNC Symbol;Acc:HGNC:10768]
	O75534	O75534	CSDE1	cold shock domain containing E1 [Source:HGNC Symbol;Acc:HGNC:29905]
	O75541	O75541	ZNF821	zinc finger protein 821 [Source:HGNC Symbol;Acc:HGNC:28043]
	O75554	O75554	WBP4	WW domain binding protein 4 [Source:HGNC Symbol;Acc:HGNC:12739]
	O75558	O75558	STX11	syntaxin 11 [Source:HGNC Symbol;Acc:HGNC:11429]
	O75563	O75563	SKAP2	src kinase associated phosphoprotein 2 [Source:HGNC Symbol;Acc:HGNC:15687]
	O75569	O75569	PRKRA	protein activator of interferon induced protein kinase EIF2AK2 [Source:HGNC Symbol;Acc:HGNC:9438]
	O75570	O75570	MTRF1	mitochondrial translation release factor 1 [Source:HGNC Symbol;Acc:HGNC:7469]
	O75575	O75575	CRCP	CGRP receptor component [Source:HGNC Symbol;Acc:HGNC:17888]
	O75581	O75581	LRP6	LDL receptor related protein 6 [Source:HGNC Symbol;Acc:HGNC:6698]
	O75582	O75582	RPS6KA5	ribosomal protein S6 kinase A5 [Source:HGNC Symbol;Acc:HGNC:10434]
	O75586	O75586	MED6	mediator complex subunit 6 [Source:HGNC Symbol;Acc:HGNC:19970]
	O75592	O75592	MYCBP2	MYC binding protein 2 [Source:HGNC Symbol;Acc:HGNC:23386]
	O75596	O75596	CLEC3A	C-type lectin domain family 3 member A [Source:HGNC Symbol;Acc:HGNC:2052]
	O75600	O75600	GCAT	glycine C-acetyltransferase [Source:HGNC Symbol;Acc:HGNC:4188]
	O75604	O75604	USP2	ubiquitin specific peptidase 2 [Source:HGNC Symbol;Acc:HGNC:12618]
	O75607	O75607	NPM3	nucleophosmin/nucleoplasmin 3 [Source:HGNC Symbol;Acc:HGNC:7931]
	O75608	O75608	LYPLA1	lysophospholipase 1 [Source:HGNC Symbol;Acc:HGNC:6737]
	O75610	O75610	LEFTY1	left-right determination factor 1 [Source:HGNC Symbol;Acc:HGNC:6552]
	O75616	O75616	ERAL1	Era like 12S mitochondrial rRNA chaperone 1 [Source:HGNC Symbol;Acc:HGNC:3424]
	O75618	O75618	DEDD	death effector domain containing [Source:HGNC Symbol;Acc:HGNC:2755]
	O75629	O75629	CREG1	cellular repressor of E1A stimulated genes 1 [Source:HGNC Symbol;Acc:HGNC:2351]
	O75635	O75635	SERPINB7	serpin family B member 7 [Source:HGNC Symbol;Acc:HGNC:13902]
	O75643	O75643	SNRNP200	small nuclear ribonucleoprotein U5 subunit 200 [Source:HGNC Symbol;Acc:HGNC:30859]
	O75648	O75648	TRMU	tRNA mitochondrial 2-thiouridylase [Source:HGNC Symbol;Acc:HGNC:25481]
	O75663	O75663	TIPRL	TOR signaling pathway regulator [Source:HGNC Symbol;Acc:HGNC:30231]
	O75665	O75665	OFD1	OFD1 centriole and centriolar satellite protein [Source:HGNC Symbol;Acc:HGNC:2567]
	O75674	O75674	TOM1L1	target of myb1 like 1 membrane trafficking protein [Source:HGNC Symbol;Acc:HGNC:11983]
	O75676	O75676	RPS6KA4	ribosomal protein S6 kinase A4 [Source:HGNC Symbol;Acc:HGNC:10433]
	O75683	O75683	SURF6	surfeit 6 [Source:HGNC Symbol;Acc:HGNC:11478]
	O75688	O75688	PPM1B	protein phosphatase, Mg2+/Mn2+ dependent 1B [Source:HGNC Symbol;Acc:HGNC:9276]
	O75689	O75689	ADAP1	ArfGAP with dual PH domains 1 [Source:HGNC Symbol;Acc:HGNC:16486]
	O75691	O75691	UTP20	UTP20 small subunit processome component [Source:HGNC Symbol;Acc:HGNC:17897]
	O75694	O75694	NUP155	nucleoporin 155 [Source:HGNC Symbol;Acc:HGNC:8063]
	O75695	O75695	RP2	RP2 activator of ARL3 GTPase [Source:HGNC Symbol;Acc:HGNC:10274]
	O75716	O75716	STK16	serine/threonine kinase 16 [Source:HGNC Symbol;Acc:HGNC:11394]
	O75717	O75717	WDHD1	WD repeat and HMG-box DNA binding protein 1 [Source:HGNC Symbol;Acc:HGNC:23170]
	O75718	O75718	CRTAP	cartilage associated protein [Source:HGNC Symbol;Acc:HGNC:2379]
	O75746	O75746	SLC25A12	solute carrier family 25 member 12 [Source:HGNC Symbol;Acc:HGNC:10982]
	O75747	O75747	PIK3C2G	phosphatidylinositol-4-phosphate 3-kinase catalytic subunit type 2 gamma [Source:HGNC Symbol;Acc:HGNC:8973]
	O75751	O75751	SLC22A3	solute carrier family 22 member 3 [Source:HGNC Symbol;Acc:HGNC:10967]
	O75752	O75752	B3GALNT1	beta-1,3-N-acetylgalactosaminyltransferase 1 (globoside blood group) [Source:HGNC Symbol;Acc:HGNC:918]
	O75762	O75762	TRPA1	transient receptor potential cation channel subfamily A member 1 [Source:HGNC Symbol;Acc:HGNC:497]
	O75764	O75764	TCEA3	transcription elongation factor A3 [Source:HGNC Symbol;Acc:HGNC:11615]
	O75771	O75771	RAD51D	RAD51 paralog D [Source:HGNC Symbol;Acc:HGNC:9823]
	O75781	O75781	PALM	paralemmin [Source:HGNC Symbol;Acc:HGNC:8594]
	O75787	O75787	ATP6AP2	ATPase H+ transporting accessory protein 2 [Source:HGNC Symbol;Acc:HGNC:18305]
	O75791	O75791	GRAP2	GRB2 related adaptor protein 2 [Source:HGNC Symbol;Acc:HGNC:4563]
	O75792	O75792	RNASEH2A	ribonuclease H2 subunit A [Source:HGNC Symbol;Acc:HGNC:18518]
	O75794	O75794	CDC123	cell division cycle 123 [Source:HGNC Symbol;Acc:HGNC:16827]
	O75795	O75795	UGT2B17	UDP glucuronosyltransferase family 2 member B17 [Source:HGNC Symbol;Acc:HGNC:12547]
	O75808	O75808	CAPN15	calpain 15 [Source:HGNC Symbol;Acc:HGNC:11182]
	O75815	O75815	BCAR3	BCAR3 adaptor protein, NSP family member [Source:HGNC Symbol;Acc:HGNC:973]
	O75817	O75817	POP7	POP7 homolog, ribonuclease P/MRP subunit [Source:HGNC Symbol;Acc:HGNC:19949]
	O75818	O75818	RPP40	ribonuclease P/MRP subunit p40 [Source:HGNC Symbol;Acc:HGNC:20992]
	O75820	O75820	ZNF189	zinc finger protein 189 [Source:HGNC Symbol;Acc:HGNC:12980]
	O75821	O75821	EIF3G	eukaryotic translation initiation factor 3 subunit G [Source:HGNC Symbol;Acc:HGNC:3274]
	O75822	O75822	EIF3J	eukaryotic translation initiation factor 3 subunit J [Source:HGNC Symbol;Acc:HGNC:3270]
	O75828	O75828	CBR3	carbonyl reductase 3 [Source:HGNC Symbol;Acc:HGNC:1549]
	O75832	O75832	PSMD10	proteasome 26S subunit, non-ATPase 10 [Source:HGNC Symbol;Acc:HGNC:9555]
	O75840	O75840	KLF7	Kruppel like factor 7 [Source:HGNC Symbol;Acc:HGNC:6350]
	O75841	O75841	UPK1B	uroplakin 1B [Source:HGNC Symbol;Acc:HGNC:12578]
	O75843	O75843	AP1G2	adaptor related protein complex 1 subunit gamma 2 [Source:HGNC Symbol;Acc:HGNC:556]
	O75844	O75844	ZMPSTE24	zinc metallopeptidase STE24 [Source:HGNC Symbol;Acc:HGNC:12877]
	O75845	O75845	SC5D	sterol-C5-desaturase [Source:HGNC Symbol;Acc:HGNC:10547]
	O75864	O75864	PPP1R37	protein phosphatase 1 regulatory subunit 37 [Source:HGNC Symbol;Acc:HGNC:27607]
	O75865	O75865	TRAPPC6A	trafficking protein particle complex subunit 6A [Source:HGNC Symbol;Acc:HGNC:23069]
	O75874	O75874	IDH1	isocitrate dehydrogenase (NADP(+)) 1 [Source:HGNC Symbol;Acc:HGNC:5382]
	O75879	O75879	GATB	glutamyl-tRNA amidotransferase subunit B [Source:HGNC Symbol;Acc:HGNC:8849]
	O75880	O75880	SCO1	synthesis of cytochrome C oxidase 1 [Source:HGNC Symbol;Acc:HGNC:10603]
	O75881	O75881	CYP7B1	cytochrome P450 family 7 subfamily B member 1 [Source:HGNC Symbol;Acc:HGNC:2652]
	O75882	O75882	ATRN	attractin [Source:HGNC Symbol;Acc:HGNC:885]
	O75884	O75884	RBBP9	RB binding protein 9, serine hydrolase [Source:HGNC Symbol;Acc:HGNC:9892]
	O75886	O75886	STAM2	signal transducing adaptor molecule 2 [Source:HGNC Symbol;Acc:HGNC:11358]
	O75891	O75891	ALDH1L1	aldehyde dehydrogenase 1 family member L1 [Source:HGNC Symbol;Acc:HGNC:3978]
	O75896	O75896	TUSC2	tumor suppressor 2, mitochondrial calcium regulator [Source:HGNC Symbol;Acc:HGNC:17034]
	O75897	O75897	SULT1C4	sulfotransferase family 1C member 4 [Source:HGNC Symbol;Acc:HGNC:11457]
	O75901	O75901	RASSF9	Ras association domain family member 9 [Source:HGNC Symbol;Acc:HGNC:15739]
	O75907	O75907	DGAT1	diacylglycerol O-acyltransferase 1 [Source:HGNC Symbol;Acc:HGNC:2843]
	O75909	O75909	CCNK	cyclin K [Source:HGNC Symbol;Acc:HGNC:1596]
	O75911	O75911	DHRS3	dehydrogenase/reductase 3 [Source:HGNC Symbol;Acc:HGNC:17693]
	O75912	O75912	DGKI	diacylglycerol kinase iota [Source:HGNC Symbol;Acc:HGNC:2855]
	O75914	O75914	PAK3	p21 (RAC1) activated kinase 3 [Source:HGNC Symbol;Acc:HGNC:8592]
	O75915	O75915	ARL6IP5	ADP ribosylation factor like GTPase 6 interacting protein 5 [Source:HGNC Symbol;Acc:HGNC:16937]
	O75920	O75920	SERF1A	small EDRK-rich factor 1A [Source:HGNC Symbol;Acc:HGNC:10755]
	O75923	O75923	DYSF	dysferlin [Source:HGNC Symbol;Acc:HGNC:3097]
	O75925	O75925	PIAS1	protein inhibitor of activated STAT 1 [Source:HGNC Symbol;Acc:HGNC:2752]
	O75928	O75928	PIAS2	protein inhibitor of activated STAT 2 [Source:HGNC Symbol;Acc:HGNC:17311]
	O75934	O75934	BCAS2	BCAS2 pre-mRNA processing factor [Source:HGNC Symbol;Acc:HGNC:975]
	O75935	O75935	DCTN3	dynactin subunit 3 [Source:HGNC Symbol;Acc:HGNC:2713]
	O75937	O75937	DNAJC8	DnaJ heat shock protein family (Hsp40) member C8 [Source:HGNC Symbol;Acc:HGNC:15470]
	O75940	O75940	SMNDC1	survival motor neuron domain containing 1 [Source:HGNC Symbol;Acc:HGNC:16900]
	O75943	O75943	RAD17	RAD17 checkpoint clamp loader component [Source:HGNC Symbol;Acc:HGNC:9807]
	O75947	O75947	ATP5PD	ATP synthase peripheral stalk subunit d [Source:HGNC Symbol;Acc:HGNC:845]
	O75952	O75952	CABYR	calcium binding tyrosine phosphorylation regulated [Source:HGNC Symbol;Acc:HGNC:15569]
	O75953	O75953	DNAJB5	DnaJ heat shock protein family (Hsp40) member B5 [Source:HGNC Symbol;Acc:HGNC:14887]
	O75955	O75955	FLOT1	flotillin 1 [Source:HGNC Symbol;Acc:HGNC:3757]
	O75956	O75956	CDK2AP2	cyclin dependent kinase 2 associated protein 2 [Source:HGNC Symbol;Acc:HGNC:30833]
	O75962	O75962	TRIO	trio Rho guanine nucleotide exchange factor [Source:HGNC Symbol;Acc:HGNC:12303]
	O75964	O75964	ATP5MG	ATP synthase membrane subunit g [Source:HGNC Symbol;Acc:HGNC:14247]
	O75969	O75969	AKAP3	A-kinase anchoring protein 3 [Source:HGNC Symbol;Acc:HGNC:373]
	O75970	O75970	MPDZ	multiple PDZ domain crumbs cell polarity complex component [Source:HGNC Symbol;Acc:HGNC:7208]
	O75971	O75971	SNAPC5	small nuclear RNA activating complex polypeptide 5 [Source:HGNC Symbol;Acc:HGNC:15484]
	O75973	O75973	C1QL1	complement C1q like 1 [Source:HGNC Symbol;Acc:HGNC:24182]
	O75976	O75976	CPD	carboxypeptidase D [Source:HGNC Symbol;Acc:HGNC:2301]
	O76003	O76003	GLRX3	glutaredoxin 3 [Source:HGNC Symbol;Acc:HGNC:15987]
	O76021	O76021	RSL1D1	ribosomal L1 domain containing 1 [Source:HGNC Symbol;Acc:HGNC:24534]
	O76024	O76024	WFS1	wolframin ER transmembrane glycoprotein [Source:HGNC Symbol;Acc:HGNC:12762]
	O76027	O76027	ANXA9	annexin A9 [Source:HGNC Symbol;Acc:HGNC:547]
	O76031	O76031	CLPX	caseinolytic mitochondrial matrix peptidase chaperone subunit X [Source:HGNC Symbol;Acc:HGNC:2088]
	O76038	O76038	SCGN	secretagogin, EF-hand calcium binding protein [Source:HGNC Symbol;Acc:HGNC:16941]
	O76039	O76039	CDKL5	cyclin dependent kinase like 5 [Source:HGNC Symbol;Acc:HGNC:11411]
	O76041	O76041	NEBL	nebulette [Source:HGNC Symbol;Acc:HGNC:16932]
	O76054	O76054	SEC14L2	SEC14 like lipid binding 2 [Source:HGNC Symbol;Acc:HGNC:10699]
	O76061	O76061	STC2	stanniocalcin 2 [Source:HGNC Symbol;Acc:HGNC:11374]
	O76062	O76062	TM7SF2	transmembrane 7 superfamily member 2 [Source:HGNC Symbol;Acc:HGNC:11863]
	O76064	O76064	RNF8	ring finger protein 8 [Source:HGNC Symbol;Acc:HGNC:10071]
	O76070	O76070	SNCG	synuclein gamma [Source:HGNC Symbol;Acc:HGNC:11141]
	O76071	O76071	CIAO1	cytosolic iron-sulfur assembly component 1 [Source:HGNC Symbol;Acc:HGNC:14280]
	O76074	O76074	PDE5A	phosphodiesterase 5A [Source:HGNC Symbol;Acc:HGNC:8784]
	O76075	O76075	DFFB	DNA fragmentation factor subunit beta [Source:HGNC Symbol;Acc:HGNC:2773]
	O76080	O76080	ZFAND5	zinc finger AN1-type containing 5 [Source:HGNC Symbol;Acc:HGNC:13008]
	O76081	O76081	RGS20	regulator of G protein signaling 20 [Source:HGNC Symbol;Acc:HGNC:14600]
	O76082	O76082	SLC22A5	solute carrier family 22 member 5 [Source:HGNC Symbol;Acc:HGNC:10969]
	O76083	O76083	PDE9A	phosphodiesterase 9A [Source:HGNC Symbol;Acc:HGNC:8795]
	O76094	O76094	SRP72	signal recognition particle 72 [Source:HGNC Symbol;Acc:HGNC:11303]
	O76095	O76095	JTB	jumping translocation breakpoint [Source:HGNC Symbol;Acc:HGNC:6201]
	O77932	O77932	DXO	decapping exoribonuclease [Source:HGNC Symbol;Acc:HGNC:2992]
	O94759	O94759	TRPM2	transient receptor potential cation channel subfamily M member 2 [Source:HGNC Symbol;Acc:HGNC:12339]
	O94760	O94760	DDAH1	dimethylarginine dimethylaminohydrolase 1 [Source:HGNC Symbol;Acc:HGNC:2715]
	O94761	O94761	RECQL4	RecQ like helicase 4 [Source:HGNC Symbol;Acc:HGNC:9949]
	O94762	O94762	RECQL5	RecQ like helicase 5 [Source:HGNC Symbol;Acc:HGNC:9950]
	O94763	O94763	URI1	URI1 prefoldin like chaperone [Source:HGNC Symbol;Acc:HGNC:13236]
	O94766	O94766	B3GAT3	beta-1,3-glucuronyltransferase 3 [Source:HGNC Symbol;Acc:HGNC:923]
	O94768	O94768	STK17B	serine/threonine kinase 17b [Source:HGNC Symbol;Acc:HGNC:11396]
	O94776	O94776	MTA2	metastasis associated 1 family member 2 [Source:HGNC Symbol;Acc:HGNC:7411]
	O94782	O94782	USP1	ubiquitin specific peptidase 1 [Source:HGNC Symbol;Acc:HGNC:12607]
	O94788	O94788	ALDH1A2	aldehyde dehydrogenase 1 family member A2 [Source:HGNC Symbol;Acc:HGNC:15472]
	O94804	O94804	STK10	serine/threonine kinase 10 [Source:HGNC Symbol;Acc:HGNC:11388]
	O94805	O94805	ACTL6B	actin like 6B [Source:HGNC Symbol;Acc:HGNC:160]
	O94806	O94806	PRKD3	protein kinase D3 [Source:HGNC Symbol;Acc:HGNC:9408]
	O94808	O94808	GFPT2	glutamine-fructose-6-phosphate transaminase 2 [Source:HGNC Symbol;Acc:HGNC:4242]
	O94811	O94811	TPPP	tubulin polymerization promoting protein [Source:HGNC Symbol;Acc:HGNC:24164]
	O94813	O94813	SLIT2	slit guidance ligand 2 [Source:HGNC Symbol;Acc:HGNC:11086]
	O94817	O94817	ATG12	autophagy related 12 [Source:HGNC Symbol;Acc:HGNC:588]
	O94818	O94818	NOL4	nucleolar protein 4 [Source:HGNC Symbol;Acc:HGNC:7870]
	O94819	O94819	KBTBD11	kelch repeat and BTB domain containing 11 [Source:HGNC Symbol;Acc:HGNC:29104]
	O94822	O94822	LTN1	listerin E3 ubiquitin protein ligase 1 [Source:HGNC Symbol;Acc:HGNC:13082]
	O94826	O94826	TOMM70	translocase of outer mitochondrial membrane 70 [Source:HGNC Symbol;Acc:HGNC:11985]
	O94827	O94827	PLEKHG5	pleckstrin homology and RhoGEF domain containing G5 [Source:HGNC Symbol;Acc:HGNC:29105]
	O94829	O94829	IPO13	importin 13 [Source:HGNC Symbol;Acc:HGNC:16853]
	O94830	O94830	DDHD2	DDHD domain containing 2 [Source:HGNC Symbol;Acc:HGNC:29106]
	O94832	O94832	MYO1D	myosin ID [Source:HGNC Symbol;Acc:HGNC:7598]
	O94842	O94842	TOX4	TOX high mobility group box family member 4 [Source:HGNC Symbol;Acc:HGNC:20161]
	O94844	O94844	RHOBTB1	Rho related BTB domain containing 1 [Source:HGNC Symbol;Acc:HGNC:18738]
	O94850	O94850	DDN	dendrin [Source:HGNC Symbol;Acc:HGNC:24458]
	O94851	O94851	MICAL2	microtubule associated monooxygenase, calponin and LIM domain containing 2 [Source:HGNC Symbol;Acc:HGNC:24693]
	O94855	O94855	SEC24D	SEC24 homolog D, COPII coat complex component [Source:HGNC Symbol;Acc:HGNC:10706]
	O94864	O94864	SUPT7L	SPT7 like, STAGA complex subunit gamma [Source:HGNC Symbol;Acc:HGNC:30632]
	O94868	O94868	FCHSD2	FCH and double SH3 domains 2 [Source:HGNC Symbol;Acc:HGNC:29114]
	O94874	O94874	UFL1	UFM1 specific ligase 1 [Source:HGNC Symbol;Acc:HGNC:23039]
	O94875	O94875	SORBS2	sorbin and SH3 domain containing 2 [Source:HGNC Symbol;Acc:HGNC:24098]
	O94876	O94876	TMCC1	transmembrane and coiled-coil domain family 1 [Source:HGNC Symbol;Acc:HGNC:29116]
	O94880	O94880	PHF14	PHD finger protein 14 [Source:HGNC Symbol;Acc:HGNC:22203]
	O94885	O94885	SASH1	SAM and SH3 domain containing 1 [Source:HGNC Symbol;Acc:HGNC:19182]
	O94886	O94886	TMEM63A	transmembrane protein 63A [Source:HGNC Symbol;Acc:HGNC:29118]
	O94887	O94887	FARP2	FERM, ARH/RhoGEF and pleckstrin domain protein 2 [Source:HGNC Symbol;Acc:HGNC:16460]
	O94888	O94888	UBXN7	UBX domain protein 7 [Source:HGNC Symbol;Acc:HGNC:29119]
	O94889	O94889	KLHL18	kelch like family member 18 [Source:HGNC Symbol;Acc:HGNC:29120]
	O94892	O94892	ZNF432	zinc finger protein 432 [Source:HGNC Symbol;Acc:HGNC:20810]
	O94898	O94898	LRIG2	leucine rich repeats and immunoglobulin like domains 2 [Source:HGNC Symbol;Acc:HGNC:20889]
	O94900	O94900	TOX	thymocyte selection associated high mobility group box [Source:HGNC Symbol;Acc:HGNC:18988]
	O94901	O94901	SUN1	Sad1 and UNC84 domain containing 1 [Source:HGNC Symbol;Acc:HGNC:18587]
	O94903	O94903	PLPBP	pyridoxal phosphate binding protein [Source:HGNC Symbol;Acc:HGNC:9457]
	O94905	O94905	ERLIN2	ER lipid raft associated 2 [Source:HGNC Symbol;Acc:HGNC:1356]
	O94906	O94906	PRPF6	pre-mRNA processing factor 6 [Source:HGNC Symbol;Acc:HGNC:15860]
	O94907	O94907	DKK1	dickkopf WNT signaling pathway inhibitor 1 [Source:HGNC Symbol;Acc:HGNC:2891]
	O94910	O94910	ADGRL1	adhesion G protein-coupled receptor L1 [Source:HGNC Symbol;Acc:HGNC:20973]
	O94913	O94913	PCF11	PCF11 cleavage and polyadenylation factor subunit [Source:HGNC Symbol;Acc:HGNC:30097]
	O94915	O94915	FRYL	FRY like transcription coactivator [Source:HGNC Symbol;Acc:HGNC:29127]
	O94916	O94916	NFAT5	nuclear factor of activated T cells 5 [Source:HGNC Symbol;Acc:HGNC:7774]
	O94919	O94919	ENDOD1	endonuclease domain containing 1 [Source:HGNC Symbol;Acc:HGNC:29129]
	O94921	O94921	CDK14	cyclin dependent kinase 14 [Source:HGNC Symbol;Acc:HGNC:8883]
	O94923	O94923	GLCE	glucuronic acid epimerase [Source:HGNC Symbol;Acc:HGNC:17855]
	O94925	O94925	GLS	glutaminase [Source:HGNC Symbol;Acc:HGNC:4331]
	O94927	O94927	HAUS5	HAUS augmin like complex subunit 5 [Source:HGNC Symbol;Acc:HGNC:29130]
	O94933	O94933	SLITRK3	SLIT and NTRK like family member 3 [Source:HGNC Symbol;Acc:HGNC:23501]
	O94941	O94941	UBOX5	U-box domain containing 5 [Source:HGNC Symbol;Acc:HGNC:17777]
	O94952	O94952	FBXO21	F-box protein 21 [Source:HGNC Symbol;Acc:HGNC:13592]
	O94955	O94955	RHOBTB3	Rho related BTB domain containing 3 [Source:HGNC Symbol;Acc:HGNC:18757]
	O94956	O94956	SLCO2B1	solute carrier organic anion transporter family member 2B1 [Source:HGNC Symbol;Acc:HGNC:10962]
	O94964	O94964	SOGA1	suppressor of glucose, autophagy associated 1 [Source:HGNC Symbol;Acc:HGNC:16111]
	O94966	O94966	USP19	ubiquitin specific peptidase 19 [Source:HGNC Symbol;Acc:HGNC:12617]
	O94967	O94967	WDR47	WD repeat domain 47 [Source:HGNC Symbol;Acc:HGNC:29141]
	O94972	O94972	TRIM37	tripartite motif containing 37 [Source:HGNC Symbol;Acc:HGNC:7523]
	O94973	O94973	AP2A2	adaptor related protein complex 2 subunit alpha 2 [Source:HGNC Symbol;Acc:HGNC:562]
	O94979	O94979	SEC31A	SEC31 homolog A, COPII coat complex component [Source:HGNC Symbol;Acc:HGNC:17052]
	O94983	O94983	CAMTA2	calmodulin binding transcription activator 2 [Source:HGNC Symbol;Acc:HGNC:18807]
	O94985	O94985	CLSTN1	calsyntenin 1 [Source:HGNC Symbol;Acc:HGNC:17447]
	O94986	O94986	CEP152	centrosomal protein 152 [Source:HGNC Symbol;Acc:HGNC:29298]
	O94988	O94988	FAM13A	family with sequence similarity 13 member A [Source:HGNC Symbol;Acc:HGNC:19367]
	O94991	O94991	SLITRK5	SLIT and NTRK like family member 5 [Source:HGNC Symbol;Acc:HGNC:20295]
	O94992	O94992	HEXIM1	HEXIM P-TEFb complex subunit 1 [Source:HGNC Symbol;Acc:HGNC:24953]
	O95025	O95025	SEMA3D	semaphorin 3D [Source:HGNC Symbol;Acc:HGNC:10726]
	O95049	O95049	TJP3	tight junction protein 3 [Source:HGNC Symbol;Acc:HGNC:11829]
	O95057	O95057	DIRAS1	DIRAS family GTPase 1 [Source:HGNC Symbol;Acc:HGNC:19127]
	O95059	O95059	RPP14	ribonuclease P/MRP subunit p14 [Source:HGNC Symbol;Acc:HGNC:30327]
	O95067	O95067	CCNB2	cyclin B2 [Source:HGNC Symbol;Acc:HGNC:1580]
	O95070	O95070	YIF1A	Yip1 interacting factor homolog A, membrane trafficking protein [Source:HGNC Symbol;Acc:HGNC:16688]
	O95071	O95071	UBR5	ubiquitin protein ligase E3 component n-recognin 5 [Source:HGNC Symbol;Acc:HGNC:16806]
	O95081	O95081	AGFG2	ArfGAP with FG repeats 2 [Source:HGNC Symbol;Acc:HGNC:5177]
	O95084	O95084	PRSS23	serine protease 23 [Source:HGNC Symbol;Acc:HGNC:14370]
	O95104	O95104	SCAF4	SR-related CTD associated factor 4 [Source:HGNC Symbol;Acc:HGNC:19304]
	O95125	O95125	ZNF202	zinc finger protein 202 [Source:HGNC Symbol;Acc:HGNC:12994]
	O95136	O95136	S1PR2	sphingosine-1-phosphate receptor 2 [Source:HGNC Symbol;Acc:HGNC:3169]
	O95139	O95139	NDUFB6	NADH:ubiquinone oxidoreductase subunit B6 [Source:HGNC Symbol;Acc:HGNC:7701]
	O95140	O95140	MFN2	mitofusin 2 [Source:HGNC Symbol;Acc:HGNC:16877]
	O95147	O95147	DUSP14	dual specificity phosphatase 14 [Source:HGNC Symbol;Acc:HGNC:17007]
	O95149	O95149	SNUPN	snurportin 1 [Source:HGNC Symbol;Acc:HGNC:14245]
	O95154	O95154	AKR7A3	aldo-keto reductase family 7 member A3 [Source:HGNC Symbol;Acc:HGNC:390]
	O95155	O95155	UBE4B	ubiquitination factor E4B [Source:HGNC Symbol;Acc:HGNC:12500]
	O95158	O95158	NXPH4	neurexophilin 4 [Source:HGNC Symbol;Acc:HGNC:8078]
	O95159	O95159	ZFPL1	zinc finger protein like 1 [Source:HGNC Symbol;Acc:HGNC:12868]
	O95163	O95163	ELP1	elongator acetyltransferase complex subunit 1 [Source:HGNC Symbol;Acc:HGNC:5959]
	O95164	O95164	UBL3	ubiquitin like 3 [Source:HGNC Symbol;Acc:HGNC:12504]
	O95166	O95166	GABARAP	GABA type A receptor-associated protein [Source:HGNC Symbol;Acc:HGNC:4067]
	O95167	O95167	NDUFA3	NADH:ubiquinone oxidoreductase subunit A3 [Source:HGNC Symbol;Acc:HGNC:7686]
	O95168	O95168	NDUFB4	NADH:ubiquinone oxidoreductase subunit B4 [Source:HGNC Symbol;Acc:HGNC:7699]
	O95169	O95169	NDUFB8	NADH:ubiquinone oxidoreductase subunit B8 [Source:HGNC Symbol;Acc:HGNC:7703]
	O95171	O95171	SCEL	sciellin [Source:HGNC Symbol;Acc:HGNC:10573]
	O95178	O95178	NDUFB2	NADH:ubiquinone oxidoreductase subunit B2 [Source:HGNC Symbol;Acc:HGNC:7697]
	O95182	O95182	NDUFA7	NADH:ubiquinone oxidoreductase subunit A7 [Source:HGNC Symbol;Acc:HGNC:7691]
	O95183	O95183	VAMP5	vesicle associated membrane protein 5 [Source:HGNC Symbol;Acc:HGNC:12646]
	O95185	O95185	UNC5C	unc-5 netrin receptor C [Source:HGNC Symbol;Acc:HGNC:12569]
	O95190	O95190	OAZ2	ornithine decarboxylase antizyme 2 [Source:HGNC Symbol;Acc:HGNC:8096]
	O95196	O95196	CSPG5	chondroitin sulfate proteoglycan 5 [Source:HGNC Symbol;Acc:HGNC:2467]
	O95197	O95197	RTN3	reticulon 3 [Source:HGNC Symbol;Acc:HGNC:10469]
	O95198	O95198	KLHL2	kelch like family member 2 [Source:HGNC Symbol;Acc:HGNC:6353]
	O95201	O95201	ZNF205	zinc finger protein 205 [Source:HGNC Symbol;Acc:HGNC:12996]
	O95202	O95202	LETM1	leucine zipper and EF-hand containing transmembrane protein 1 [Source:HGNC Symbol;Acc:HGNC:6556]
	O95208	O95208	EPN2	epsin 2 [Source:HGNC Symbol;Acc:HGNC:18639]
	O95210	O95210	STBD1	starch binding domain 1 [Source:HGNC Symbol;Acc:HGNC:24854]
	O95218	O95218	ZRANB2	zinc finger RANBP2-type containing 2 [Source:HGNC Symbol;Acc:HGNC:13058]
	O95219	O95219	SNX4	sorting nexin 4 [Source:HGNC Symbol;Acc:HGNC:11175]
	O95229	O95229	ZWINT	ZW10 interacting kinetochore protein [Source:HGNC Symbol;Acc:HGNC:13195]
	O95232	O95232	LUC7L3	LUC7 like 3 pre-mRNA splicing factor [Source:HGNC Symbol;Acc:HGNC:24309]
	O95235	O95235	KIF20A	kinesin family member 20A [Source:HGNC Symbol;Acc:HGNC:9787]
	O95238	O95238	SPDEF	SAM pointed domain containing ETS transcription factor [Source:HGNC Symbol;Acc:HGNC:17257]
	O95239	O95239	KIF4A	kinesin family member 4A [Source:HGNC Symbol;Acc:HGNC:13339]
	O95243	O95243	MBD4	methyl-CpG binding domain 4, DNA glycosylase [Source:HGNC Symbol;Acc:HGNC:6919]
	O95248	O95248	SBF1	SET binding factor 1 [Source:HGNC Symbol;Acc:HGNC:10542]
	O95251	O95251	KAT7	lysine acetyltransferase 7 [Source:HGNC Symbol;Acc:HGNC:17016]
	O95258	O95258	SLC25A14	solute carrier family 25 member 14 [Source:HGNC Symbol;Acc:HGNC:10984]
	O95259	O95259	KCNH1	potassium voltage-gated channel subfamily H member 1 [Source:HGNC Symbol;Acc:HGNC:6250]
	O95260	O95260	ATE1	arginyltransferase 1 [Source:HGNC Symbol;Acc:HGNC:782]
	O95263	O95263	PDE8B	phosphodiesterase 8B [Source:HGNC Symbol;Acc:HGNC:8794]
	O95271	O95271	TNKS	tankyrase [Source:HGNC Symbol;Acc:HGNC:11941]
	O95273	O95273	CCNDBP1	cyclin D1 binding protein 1 [Source:HGNC Symbol;Acc:HGNC:1587]
	O95274	O95274	LYPD3	LY6/PLAUR domain containing 3 [Source:HGNC Symbol;Acc:HGNC:24880]
	O95278	O95278	EPM2A	EPM2A glucan phosphatase, laforin [Source:HGNC Symbol;Acc:HGNC:3413]
	O95292	O95292	VAPB	VAMP associated protein B and C [Source:HGNC Symbol;Acc:HGNC:12649]
	O95294	O95294	RASAL1	RAS protein activator like 1 [Source:HGNC Symbol;Acc:HGNC:9873]
	O95295	O95295	SNAPIN	SNAP associated protein [Source:HGNC Symbol;Acc:HGNC:17145]
	O95297	O95297	MPZL1	myelin protein zero like 1 [Source:HGNC Symbol;Acc:HGNC:7226]
	O95298	O95298	NDUFC2	NADH:ubiquinone oxidoreductase subunit C2 [Source:HGNC Symbol;Acc:HGNC:7706]
	O95299	O95299	NDUFA10	NADH:ubiquinone oxidoreductase subunit A10 [Source:HGNC Symbol;Acc:HGNC:7684]
	O95302	O95302	FKBP9	FKBP prolyl isomerase 9 [Source:HGNC Symbol;Acc:HGNC:3725]
	O95336	O95336	PGLS	6-phosphogluconolactonase [Source:HGNC Symbol;Acc:HGNC:8903]
	O95340	O95340	PAPSS2	3'-phosphoadenosine 5'-phosphosulfate synthase 2 [Source:HGNC Symbol;Acc:HGNC:8604]
	O95342	O95342	ABCB11	ATP binding cassette subfamily B member 11 [Source:HGNC Symbol;Acc:HGNC:42]
	O95347	O95347	SMC2	structural maintenance of chromosomes 2 [Source:HGNC Symbol;Acc:HGNC:14011]
	O95352	O95352	ATG7	autophagy related 7 [Source:HGNC Symbol;Acc:HGNC:16935]
	O95361	O95361	TRIM16	tripartite motif containing 16 [Source:HGNC Symbol;Acc:HGNC:17241]
	O95363	O95363	FARS2	phenylalanyl-tRNA synthetase 2, mitochondrial [Source:HGNC Symbol;Acc:HGNC:21062]
	O95365	O95365	ZBTB7A	zinc finger and BTB domain containing 7A [Source:HGNC Symbol;Acc:HGNC:18078]
	O95372	O95372	LYPLA2	lysophospholipase 2 [Source:HGNC Symbol;Acc:HGNC:6738]
	O95373	O95373	IPO7	importin 7 [Source:HGNC Symbol;Acc:HGNC:9852]
	O95376	O95376	ARIH2	ariadne RBR E3 ubiquitin protein ligase 2 [Source:HGNC Symbol;Acc:HGNC:690]
	O95379	O95379	TNFAIP8	TNF alpha induced protein 8 [Source:HGNC Symbol;Acc:HGNC:17260]
	O95382	O95382	MAP3K6	mitogen-activated protein kinase kinase kinase 6 [Source:HGNC Symbol;Acc:HGNC:6858]
	O95390	O95390	GDF11	growth differentiation factor 11 [Source:HGNC Symbol;Acc:HGNC:4216]
	O95391	O95391	SLU7	SLU7 homolog, splicing factor [Source:HGNC Symbol;Acc:HGNC:16939]
	O95394	O95394	PGM3	phosphoglucomutase 3 [Source:HGNC Symbol;Acc:HGNC:8907]
	O95396	O95396	MOCS3	molybdenum cofactor synthesis 3 [Source:HGNC Symbol;Acc:HGNC:15765]
	O95399	O95399	UTS2	urotensin 2 [Source:HGNC Symbol;Acc:HGNC:12636]
	O95400	O95400	CD2BP2	CD2 cytoplasmic tail binding protein 2 [Source:HGNC Symbol;Acc:HGNC:1656]
	O95402	O95402	MED26	mediator complex subunit 26 [Source:HGNC Symbol;Acc:HGNC:2376]
	O95405	O95405	ZFYVE9	zinc finger FYVE-type containing 9 [Source:HGNC Symbol;Acc:HGNC:6775]
	O95409	O95409	ZIC2	Zic family member 2 [Source:HGNC Symbol;Acc:HGNC:12873]
	O95415	O95415	BRI3	brain protein I3 [Source:HGNC Symbol;Acc:HGNC:1109]
	O95425	O95425	SVIL	supervillin [Source:HGNC Symbol;Acc:HGNC:11480]
	O95427	O95427	PIGN	phosphatidylinositol glycan anchor biosynthesis class N [Source:HGNC Symbol;Acc:HGNC:8967]
	O95428	O95428	PAPLN	papilin, proteoglycan like sulfated glycoprotein [Source:HGNC Symbol;Acc:HGNC:19262]
	O95429	O95429	BAG4	BAG cochaperone 4 [Source:HGNC Symbol;Acc:HGNC:940]
	O95433	O95433	AHSA1	activator of HSP90 ATPase activity 1 [Source:HGNC Symbol;Acc:HGNC:1189]
	O95445	O95445	APOM	apolipoprotein M [Source:HGNC Symbol;Acc:HGNC:13916]
	O95450	O95450	ADAMTS2	ADAM metallopeptidase with thrombospondin type 1 motif 2 [Source:HGNC Symbol;Acc:HGNC:218]
	O95453	O95453	PARN	poly(A)-specific ribonuclease [Source:HGNC Symbol;Acc:HGNC:8609]
	O95455	O95455	TGDS	TDP-glucose 4,6-dehydratase [Source:HGNC Symbol;Acc:HGNC:20324]
	O95456	O95456	PSMG1	proteasome assembly chaperone 1 [Source:HGNC Symbol;Acc:HGNC:3043]
	O95461	O95461	LARGE1	LARGE xylosyl- and glucuronyltransferase 1 [Source:HGNC Symbol;Acc:HGNC:6511]
	O95466	O95466	FMNL1	formin like 1 [Source:HGNC Symbol;Acc:HGNC:1212]
	O95470	O95470	SGPL1	sphingosine-1-phosphate lyase 1 [Source:HGNC Symbol;Acc:HGNC:10817]
	O95475	O95475	SIX6	SIX homeobox 6 [Source:HGNC Symbol;Acc:HGNC:10892]
	O95476	O95476	CTDNEP1	CTD nuclear envelope phosphatase 1 [Source:HGNC Symbol;Acc:HGNC:19085]
	O95478	O95478	NSA2	NSA2 ribosome biogenesis factor [Source:HGNC Symbol;Acc:HGNC:30728]
	O95479	O95479	H6PD	hexose-6-phosphate dehydrogenase/glucose 1-dehydrogenase [Source:HGNC Symbol;Acc:HGNC:4795]
	O95486	O95486	SEC24A	SEC24 homolog A, COPII coat complex component [Source:HGNC Symbol;Acc:HGNC:10703]
	O95487	O95487	SEC24B	SEC24 homolog B, COPII coat complex component [Source:HGNC Symbol;Acc:HGNC:10704]
	O95497	O95497	VNN1	vanin 1 [Source:HGNC Symbol;Acc:HGNC:12705]
	O95498	O95498	VNN2	vanin 2 [Source:HGNC Symbol;Acc:HGNC:12706]
	O95502	O95502	NPTXR	neuronal pentraxin receptor [Source:HGNC Symbol;Acc:HGNC:7954]
	O95503	O95503	CBX6	chromobox 6 [Source:HGNC Symbol;Acc:HGNC:1556]
	O95528	O95528	SLC2A10	solute carrier family 2 member 10 [Source:HGNC Symbol;Acc:HGNC:13444]
	O95544	O95544	NADK	NAD kinase [Source:HGNC Symbol;Acc:HGNC:29831]
	O95551	O95551	TDP2	tyrosyl-DNA phosphodiesterase 2 [Source:HGNC Symbol;Acc:HGNC:17768]
	O95562	O95562	SFT2D2	SFT2 domain containing 2 [Source:HGNC Symbol;Acc:HGNC:25140]
	O95563	O95563	MPC2	mitochondrial pyruvate carrier 2 [Source:HGNC Symbol;Acc:HGNC:24515]
	O95568	O95568	METTL18	methyltransferase like 18 [Source:HGNC Symbol;Acc:HGNC:28793]
	O95571	O95571	ETHE1	ETHE1 persulfide dioxygenase [Source:HGNC Symbol;Acc:HGNC:23287]
	O95573	O95573	ACSL3	acyl-CoA synthetase long chain family member 3 [Source:HGNC Symbol;Acc:HGNC:3570]
	O95602	O95602	POLR1A	RNA polymerase I subunit A [Source:HGNC Symbol;Acc:HGNC:17264]
	O95613	O95613	PCNT	pericentrin [Source:HGNC Symbol;Acc:HGNC:16068]
	O95619	O95619	YEATS4	YEATS domain containing 4 [Source:HGNC Symbol;Acc:HGNC:24859]
	O95620	O95620	DUS4L	dihydrouridine synthase 4 like [Source:HGNC Symbol;Acc:HGNC:21517]
	O95622	O95622	ADCY5	adenylate cyclase 5 [Source:HGNC Symbol;Acc:HGNC:236]
	O95625	O95625	ZBTB11	zinc finger and BTB domain containing 11 [Source:HGNC Symbol;Acc:HGNC:16740]
	O95626	O95626	ANP32D	acidic nuclear phosphoprotein 32 family member D [Source:HGNC Symbol;Acc:HGNC:16676]
	O95628	O95628	CNOT4	CCR4-NOT transcription complex subunit 4 [Source:HGNC Symbol;Acc:HGNC:7880]
	O95630	O95630	STAMBP	STAM binding protein [Source:HGNC Symbol;Acc:HGNC:16950]
	O95631	O95631	NTN1	netrin 1 [Source:HGNC Symbol;Acc:HGNC:8029]
	O95633	O95633	FSTL3	follistatin like 3 [Source:HGNC Symbol;Acc:HGNC:3973]
	O95639	O95639	CPSF4	cleavage and polyadenylation specific factor 4 [Source:HGNC Symbol;Acc:HGNC:2327]
	O95644	O95644	NFATC1	nuclear factor of activated T cells 1 [Source:HGNC Symbol;Acc:HGNC:7775]
	O95670	O95670	ATP6V1G2	ATPase H+ transporting V1 subunit G2 [Source:HGNC Symbol;Acc:HGNC:862]
	O95671	O95671	ASMTL	acetylserotonin O-methyltransferase like [Source:HGNC Symbol;Acc:HGNC:751]
	O95672	O95672	ECEL1	endothelin converting enzyme like 1 [Source:HGNC Symbol;Acc:HGNC:3147]
	O95674	O95674	CDS2	CDP-diacylglycerol synthase 2 [Source:HGNC Symbol;Acc:HGNC:1801]
	O95677	O95677	EYA4	EYA transcriptional coactivator and phosphatase 4 [Source:HGNC Symbol;Acc:HGNC:3522]
	O95684	O95684	CEP43	centrosomal protein 43 [Source:HGNC Symbol;Acc:HGNC:17012]
	O95685	O95685	PPP1R3D	protein phosphatase 1 regulatory subunit 3D [Source:HGNC Symbol;Acc:HGNC:9294]
	O95696	O95696	BRD1	bromodomain containing 1 [Source:HGNC Symbol;Acc:HGNC:1102]
	O95707	O95707	POP4	POP4 homolog, ribonuclease P/MRP subunit [Source:HGNC Symbol;Acc:HGNC:30081]
	O95714	O95714	HERC2	HECT and RLD domain containing E3 ubiquitin protein ligase 2 [Source:HGNC Symbol;Acc:HGNC:4868]
	O95716	O95716	RAB3D	RAB3D, member RAS oncogene family [Source:HGNC Symbol;Acc:HGNC:9779]
	O95718	O95718	ESRRB	estrogen related receptor beta [Source:HGNC Symbol;Acc:HGNC:3473]
	O95721	O95721	SNAP29	synaptosome associated protein 29 [Source:HGNC Symbol;Acc:HGNC:11133]
	O95741	O95741	CPNE6	copine 6 [Source:HGNC Symbol;Acc:HGNC:2319]
	O95747	O95747	OXSR1	oxidative stress responsive kinase 1 [Source:HGNC Symbol;Acc:HGNC:8508]
	O95749	O95749	GGPS1	geranylgeranyl diphosphate synthase 1 [Source:HGNC Symbol;Acc:HGNC:4249]
	O95751	O95751	LDOC1	LDOC1 regulator of NFKB signaling [Source:HGNC Symbol;Acc:HGNC:6548]
	O95754	O95754	SEMA4F	ssemaphorin 4F [Source:HGNC Symbol;Acc:HGNC:10734]
	O95755	O95755	RAB36	RAB36, member RAS oncogene family [Source:HGNC Symbol;Acc:HGNC:9775]
	O95757	O95757	HSPA4L	heat shock protein family A (Hsp70) member 4 like [Source:HGNC Symbol;Acc:HGNC:17041]
	O95758	O95758	PTBP3	polypyrimidine tract binding protein 3 [Source:HGNC Symbol;Acc:HGNC:10253]
	O95759	O95759	TBC1D8	TBC1 domain family member 8 [Source:HGNC Symbol;Acc:HGNC:17791]
	O95760	O95760	IL33	interleukin 33 [Source:HGNC Symbol;Acc:HGNC:16028]
	O95772	O95772	STARD3NL	STARD3 N-terminal like [Source:HGNC Symbol;Acc:HGNC:19169]
	O95777	O95777	LSM8	LSM8 homolog, U6 small nuclear RNA associated [Source:HGNC Symbol;Acc:HGNC:20471]
	O95782	O95782	AP2A1	adaptor related protein complex 2 subunit alpha 1 [Source:HGNC Symbol;Acc:HGNC:561]
	O95785	O95785	WIZ	WIZ zinc finger [Source:HGNC Symbol;Acc:HGNC:30917]
	O95786	O95786	DDX58	DExD/H-box helicase 58 [Source:HGNC Symbol;Acc:HGNC:19102]
	O95789	O95789	ZMYM6	zinc finger MYM-type containing 6 [Source:HGNC Symbol;Acc:HGNC:13050]
	O95793	O95793	STAU1	staufen double-stranded RNA binding protein 1 [Source:HGNC Symbol;Acc:HGNC:11370]
	O95801	O95801	TTC4	tetratricopeptide repeat domain 4 [Source:HGNC Symbol;Acc:HGNC:12394]
	O95807	O95807	TMEM50A	transmembrane protein 50A [Source:HGNC Symbol;Acc:HGNC:30590]
	O95810	O95810	CAVIN2	caveolae associated protein 2 [Source:HGNC Symbol;Acc:HGNC:10690]
	O95816	O95816	BAG2	BAG cochaperone 2 [Source:HGNC Symbol;Acc:HGNC:938]
	O95817	O95817	BAG3	BAG cochaperone 3 [Source:HGNC Symbol;Acc:HGNC:939]
	O95819	O95819	MAP4K4	mitogen-activated protein kinase kinase kinase kinase 4 [Source:HGNC Symbol;Acc:HGNC:6866]
	O95822	O95822	MLYCD	malonyl-CoA decarboxylase [Source:HGNC Symbol;Acc:HGNC:7150]
	O95825	O95825	CRYZL1	crystallin zeta like 1 [Source:HGNC Symbol;Acc:HGNC:2420]
	O95831	O95831	AIFM1	apoptosis inducing factor mitochondria associated 1 [Source:HGNC Symbol;Acc:HGNC:8768]
	O95833	O95833	CLIC3	chloride intracellular channel 3 [Source:HGNC Symbol;Acc:HGNC:2064]
	O95834	O95834	EML2	EMAP like 2 [Source:HGNC Symbol;Acc:HGNC:18035]
	O95835	O95835	LATS1	large tumor suppressor kinase 1 [Source:HGNC Symbol;Acc:HGNC:6514]
	O95837	O95837	GNA14	G protein subunit alpha 14 [Source:HGNC Symbol;Acc:HGNC:4382]
	O95848	O95848	NUDT14	nudix hydrolase 14 [Source:HGNC Symbol;Acc:HGNC:20141]
	O95857	O95857	TSPAN13	tetraspanin 13 [Source:HGNC Symbol;Acc:HGNC:21643]
	O95858	O95858	TSPAN15	tetraspanin 15 [Source:HGNC Symbol;Acc:HGNC:23298]
	O95861	O95861	BPNT1	3'(2'), 5'-bisphosphate nucleotidase 1 [Source:HGNC Symbol;Acc:HGNC:1096]
	O95863	O95863	SNAI1	snail family transcriptional repressor 1 [Source:HGNC Symbol;Acc:HGNC:11128]
	O95864	O95864	FADS2	fatty acid desaturase 2 [Source:HGNC Symbol;Acc:HGNC:3575]
	O95865	O95865	DDAH2	dimethylarginine dimethylaminohydrolase 2 [Source:HGNC Symbol;Acc:HGNC:2716]
	O95870	O95870	ABHD16A	abhydrolase domain containing 16A, phospholipase [Source:HGNC Symbol;Acc:HGNC:13921]
	O95873	O95873	C6orf47	chromosome 6 open reading frame 47 [Source:HGNC Symbol;Acc:HGNC:19076]
	O95881	O95881	TXNDC12	thioredoxin domain containing 12 [Source:HGNC Symbol;Acc:HGNC:24626]
	O95897	O95897	OLFM2	olfactomedin 2 [Source:HGNC Symbol;Acc:HGNC:17189]
	O95900	O95900	TRUB2	TruB pseudouridine synthase family member 2 [Source:HGNC Symbol;Acc:HGNC:17170]
	O95905	O95905	ECD	ecdysoneless cell cycle regulator [Source:HGNC Symbol;Acc:HGNC:17029]
	O95922	O95922	TTLL1	tubulin tyrosine ligase like 1 [Source:HGNC Symbol;Acc:HGNC:1312]
	O95926	O95926	SYF2	SYF2 pre-mRNA splicing factor [Source:HGNC Symbol;Acc:HGNC:19824]
	O95931	O95931	CBX7	chromobox 7 [Source:HGNC Symbol;Acc:HGNC:1557]
	O95935	O95935	TBX18	T-box transcription factor 18 [Source:HGNC Symbol;Acc:HGNC:11595]
	O95936	O95936	EOMES	eomesodermin [Source:HGNC Symbol;Acc:HGNC:3372]
	O95948	O95948	ONECUT2	one cut homeobox 2 [Source:HGNC Symbol;Acc:HGNC:8139]
	O95954	O95954	FTCD	formimidoyltransferase cyclodeaminase [Source:HGNC Symbol;Acc:HGNC:3974]
	O95980	O95980	RECK	reversion inducing cysteine rich protein with kazal motifs [Source:HGNC Symbol;Acc:HGNC:11345]
	O95983	O95983	MBD3	methyl-CpG binding domain protein 3 [Source:HGNC Symbol;Acc:HGNC:6918]
	O95985	O95985	TOP3B	DNA topoisomerase III beta [Source:HGNC Symbol;Acc:HGNC:11993]
	O95989	O95989	NUDT3	nudix hydrolase 3 [Source:HGNC Symbol;Acc:HGNC:8050]
	O95990	O95990	FAM107A	family with sequence similarity 107 member A [Source:HGNC Symbol;Acc:HGNC:30827]
	O95994	O95994	AGR2	anterior gradient 2, protein disulphide isomerase family member [Source:HGNC Symbol;Acc:HGNC:328]
	O95995	O95995	GAS8	growth arrest specific 8 [Source:HGNC Symbol;Acc:HGNC:4166]
	O95996	O95996	APC2	APC regulator of WNT signaling pathway 2 [Source:HGNC Symbol;Acc:HGNC:24036]
	O95997	O95997	PTTG1	PTTG1 regulator of sister chromatid separation, securin [Source:HGNC Symbol;Acc:HGNC:9690]
	O95999	O95999	BCL10	BCL10 immune signaling adaptor [Source:HGNC Symbol;Acc:HGNC:989]
	O96000	O96000	NDUFB10	NADH:ubiquinone oxidoreductase subunit B10 [Source:HGNC Symbol;Acc:HGNC:7696]
	O96004	O96004	HAND1	heart and neural crest derivatives expressed 1 [Source:HGNC Symbol;Acc:HGNC:4807]
	O96005	O96005	CLPTM1	CLPTM1 regulator of GABA type A receptor forward trafficking [Source:HGNC Symbol;Acc:HGNC:2087]
	O96006	O96006	ZBED1	zinc finger BED-type containing 1 [Source:HGNC Symbol;Acc:HGNC:447]
	O96007	O96007	MOCS2	molybdenum cofactor synthesis 2 [Source:HGNC Symbol;Acc:HGNC:7193]
	O96008	O96008	TOMM40	translocase of outer mitochondrial membrane 40 [Source:HGNC Symbol;Acc:HGNC:18001]
	O96011	O96011	PEX11B	peroxisomal biogenesis factor 11 beta [Source:HGNC Symbol;Acc:HGNC:8853]
	O96013	O96013	PAK4	p21 (RAC1) activated kinase 4 [Source:HGNC Symbol;Acc:HGNC:16059]
	O96014	O96014	WNT11	Wnt family member 11 [Source:HGNC Symbol;Acc:HGNC:12776]
	O96015	O96015	DNAL4	dynein axonemal light chain 4 [Source:HGNC Symbol;Acc:HGNC:2955]
	O96017	O96017	CHEK2	checkpoint kinase 2 [Source:HGNC Symbol;Acc:HGNC:16627]
	O96018	O96018	APBA3	amyloid beta precursor protein binding family A member 3 [Source:HGNC Symbol;Acc:HGNC:580]
	O96019	O96019	ACTL6A	actin like 6A [Source:HGNC Symbol;Acc:HGNC:24124]
	O96020	O96020	CCNE2	cyclin E2 [Source:HGNC Symbol;Acc:HGNC:1590]
	O96028	O96028	NSD2	nuclear receptor binding SET domain protein 2 [Source:HGNC Symbol;Acc:HGNC:12766]
	P00156	P00156	MT-CYB	mitochondrially encoded cytochrome b [Source:HGNC Symbol;Acc:HGNC:7427]
	P00167	P00167	CYB5A	cytochrome b5 type A [Source:HGNC Symbol;Acc:HGNC:2570]
	P00338	P00338	LDHA	lactate dehydrogenase A [Source:HGNC Symbol;Acc:HGNC:6535]
	P00352	P00352	ALDH1A1	aldehyde dehydrogenase 1 family member A1 [Source:HGNC Symbol;Acc:HGNC:402]
	P00367	P00367	GLUD1	glutamate dehydrogenase 1 [Source:HGNC Symbol;Acc:HGNC:4335]
	P00374	P00374	DHFR	dihydrofolate reductase [Source:HGNC Symbol;Acc:HGNC:2861]
	P00387	P00387	CYB5R3	cytochrome b5 reductase 3 [Source:HGNC Symbol;Acc:HGNC:2873]
	P00390	P00390	GSR	glutathione-disulfide reductase [Source:HGNC Symbol;Acc:HGNC:4623]
	P00395	P00395	MT-CO1	mitochondrially encoded cytochrome c oxidase I [Source:HGNC Symbol;Acc:HGNC:7419]
	P00403	P00403	MT-CO2	mitochondrially encoded cytochrome c oxidase II [Source:HGNC Symbol;Acc:HGNC:7421]
	P00414	P00414	MT-CO3	mitochondrially encoded cytochrome c oxidase III [Source:HGNC Symbol;Acc:HGNC:7422]
	P00441	P00441	SOD1	superoxide dismutase 1 [Source:HGNC Symbol;Acc:HGNC:11179]
	P00450	P00450	CP	ceruloplasmin [Source:HGNC Symbol;Acc:HGNC:2295]
	P00480	P00480	OTC	ornithine transcarbamylase [Source:HGNC Symbol;Acc:HGNC:8512]
	P00488	P00488	F13A1	coagulation factor XIII A chain [Source:HGNC Symbol;Acc:HGNC:3531]
	P00491	P00491	PNP	purine nucleoside phosphorylase [Source:HGNC Symbol;Acc:HGNC:7892]
	P00492	P00492	HPRT1	hypoxanthine phosphoribosyltransferase 1 [Source:HGNC Symbol;Acc:HGNC:5157]
	P00505	P00505	GOT2	glutamic-oxaloacetic transaminase 2 [Source:HGNC Symbol;Acc:HGNC:4433]
	P00519	P00519	ABL1	ABL proto-oncogene 1, non-receptor tyrosine kinase [Source:HGNC Symbol;Acc:HGNC:76]
	P00533	P00533	EGFR	epidermal growth factor receptor [Source:HGNC Symbol;Acc:HGNC:3236]
	P00558	P00558	PGK1	phosphoglycerate kinase 1 [Source:HGNC Symbol;Acc:HGNC:8896]
	P00568	P00568	AK1	adenylate kinase 1 [Source:HGNC Symbol;Acc:HGNC:361]
	P00734	P00734	F2	coagulation factor II, thrombin [Source:HGNC Symbol;Acc:HGNC:3535]
	P00742	P00742	F10	coagulation factor X [Source:HGNC Symbol;Acc:HGNC:3528]
	P00746	P00746	CFD	complement factor D [Source:HGNC Symbol;Acc:HGNC:2771]
	P00747	P00747	PLG	plasminogen [Source:HGNC Symbol;Acc:HGNC:9071]
	P00749	P00749	PLAU	plasminogen activator, urokinase [Source:HGNC Symbol;Acc:HGNC:9052]
	P00750	P00750	PLAT	plasminogen activator, tissue type [Source:HGNC Symbol;Acc:HGNC:9051]
	P00813	P00813	ADA	adenosine deaminase [Source:HGNC Symbol;Acc:HGNC:186]
	P00846	P00846	MT-ATP6	mitochondrially encoded ATP synthase membrane subunit 6 [Source:HGNC Symbol;Acc:HGNC:7414]
	P00918	P00918	CA2	carbonic anhydrase 2 [Source:HGNC Symbol;Acc:HGNC:1373]
	P00966	P00966	ASS1	argininosuccinate synthase 1 [Source:HGNC Symbol;Acc:HGNC:758]
	P00973	P00973	OAS1	2'-5'-oligoadenylate synthetase 1 [Source:HGNC Symbol;Acc:HGNC:8086]
	P01008	P01008	SERPINC1	serpin family C member 1 [Source:HGNC Symbol;Acc:HGNC:775]
	P01009	P01009	SERPINA1	serpin family A member 1 [Source:HGNC Symbol;Acc:HGNC:8941]
	P01011	P01011	SERPINA3	serpin family A member 3 [Source:HGNC Symbol;Acc:HGNC:16]
	P01023	P01023	A2M	alpha-2-macroglobulin [Source:HGNC Symbol;Acc:HGNC:7]
	P01024	P01024	C3	complement C3 [Source:HGNC Symbol;Acc:HGNC:1318]
	P01031	P01031	C5	complement C5 [Source:HGNC Symbol;Acc:HGNC:1331]
	P01033	P01033	TIMP1	TIMP metallopeptidase inhibitor 1 [Source:HGNC Symbol;Acc:HGNC:11820]
	P01034	P01034	CST3	cystatin C [Source:HGNC Symbol;Acc:HGNC:2475]
	P01040	P01040	CSTA	cystatin A [Source:HGNC Symbol;Acc:HGNC:2481]
	P01042	P01042	KNG1	kininogen 1 [Source:HGNC Symbol;Acc:HGNC:6383]
	P01106	P01106	MYC	MYC proto-oncogene, bHLH transcription factor [Source:HGNC Symbol;Acc:HGNC:7553]
	P01111	P01111	NRAS	NRAS proto-oncogene, GTPase [Source:HGNC Symbol;Acc:HGNC:7989]
	P01112	P01112	HRAS	HRas proto-oncogene, GTPase [Source:HGNC Symbol;Acc:HGNC:5173]
	P01116	P01116	KRAS	KRAS proto-oncogene, GTPase [Source:HGNC Symbol;Acc:HGNC:6407]
	P01130	P01130	LDLR	low density lipoprotein receptor [Source:HGNC Symbol;Acc:HGNC:6547]
	P01137	P01137	TGFB1	Transforming growth factor beta-1 proprotein
	P01189	P01189	POMC	proopiomelanocortin [Source:HGNC Symbol;Acc:HGNC:9201]
	P01210	P01210	PENK	proenkephalin [Source:HGNC Symbol;Acc:HGNC:8831]
	P01215	P01215	CGA	glycoprotein hormones, alpha polypeptide [Source:HGNC Symbol;Acc:HGNC:1885]
	P01303	P01303	NPY	neuropeptide Y [Source:HGNC Symbol;Acc:HGNC:7955]
	P01344	P01344	IGF2	insulin like growth factor 2 [Source:HGNC Symbol;Acc:HGNC:5466]
	P01623	P01619	IGKV3-20	Immunoglobulin kappa variable 3-20
	P01709	P01709	IGLV2-8	immunoglobulin lambda variable 2-8 [Source:HGNC Symbol;Acc:HGNC:5895]
	P01833	P01833	PIGR	polymeric immunoglobulin receptor [Source:HGNC Symbol;Acc:HGNC:8968]
	P01834	P01834	IGKC	Immunoglobulin kappa constant
	P01857	P01857	IGHG1	immunoglobulin heavy constant gamma 1 (G1m marker) [Source:HGNC Symbol;Acc:HGNC:5525]
	P01859	P01859	IGHG2	immunoglobulin heavy constant gamma 2 (G2m marker) [Source:HGNC Symbol;Acc:HGNC:5526]
	P01860	P01860	IGHG3	Immunoglobulin heavy constant gamma 3
	P01871	P01871	IGHM	immunoglobulin heavy constant mu [Source:HGNC Symbol;Acc:HGNC:5541]
	P01876	P01876	IGHA1	immunoglobulin heavy constant alpha 1 [Source:HGNC Symbol;Acc:HGNC:5478]
	P01889	P01889	HLA-B	major histocompatibility complex, class I, B [Source:HGNC Symbol;Acc:HGNC:4932]
	P01920	P01920	HLA-DQB1	HLA class II histocompatibility antigen, DQ beta 1 chain
	P02008	P02008	HBZ	hemoglobin subunit zeta [Source:HGNC Symbol;Acc:HGNC:4835]
	P02042	P02042	HBD	hemoglobin subunit delta [Source:HGNC Symbol;Acc:HGNC:4829]
	P02452	P02452	COL1A1	collagen type I alpha 1 chain [Source:HGNC Symbol;Acc:HGNC:2197]
	P02458	P02458	COL2A1	collagen type II alpha 1 chain [Source:HGNC Symbol;Acc:HGNC:2200]
	P02461	P02461	COL3A1	collagen type III alpha 1 chain [Source:HGNC Symbol;Acc:HGNC:2201]
	P02462	P02462	COL4A1	collagen type IV alpha 1 chain [Source:HGNC Symbol;Acc:HGNC:2202]
	P02511	P02511	CRYAB	crystallin alpha B [Source:HGNC Symbol;Acc:HGNC:2389]
	P02545	P02545	LMNA	lamin A/C [Source:HGNC Symbol;Acc:HGNC:6636]
	P02549	P02549	SPTA1	spectrin alpha, erythrocytic 1 [Source:HGNC Symbol;Acc:HGNC:11272]
	P02585	P02585	TNNC2	troponin C2, fast skeletal type [Source:HGNC Symbol;Acc:HGNC:11944]
	P02647	P02647	APOA1	apolipoprotein A1 [Source:HGNC Symbol;Acc:HGNC:600]
	P02649	P02649	APOE	apolipoprotein E [Source:HGNC Symbol;Acc:HGNC:613]
	P02656	P02656	APOC3	apolipoprotein C3 [Source:HGNC Symbol;Acc:HGNC:610]
	P02671	P02671	FGA	fibrinogen alpha chain [Source:HGNC Symbol;Acc:HGNC:3661]
	P02675	P02675	FGB	fibrinogen beta chain [Source:HGNC Symbol;Acc:HGNC:3662]
	P02679	P02679	FGG	fibrinogen gamma chain [Source:HGNC Symbol;Acc:HGNC:3694]
	P02686	P02686	MBP	myelin basic protein [Source:HGNC Symbol;Acc:HGNC:6925]
	P02748	P02748	C9	complement C9 [Source:HGNC Symbol;Acc:HGNC:1358]
	P02749	P02749	APOH	apolipoprotein H [Source:HGNC Symbol;Acc:HGNC:616]
	P02751	P02751	FN1	fibronectin 1 [Source:HGNC Symbol;Acc:HGNC:3778]
	P02753	P02753	RBP4	retinol binding protein 4 [Source:HGNC Symbol;Acc:HGNC:9922]
	P02760	P02760	AMBP	alpha-1-microglobulin/bikunin precursor [Source:HGNC Symbol;Acc:HGNC:453]
	P02765	P02765	AHSG	alpha 2-HS glycoprotein [Source:HGNC Symbol;Acc:HGNC:349]
	P02766	P02766	TTR	transthyretin [Source:HGNC Symbol;Acc:HGNC:12405]
	P02774	P02774	GC	GC vitamin D binding protein [Source:HGNC Symbol;Acc:HGNC:4187]
	P02775	P02775	PPBP	pro-platelet basic protein [Source:HGNC Symbol;Acc:HGNC:9240]
	P02786	P02786	TFRC	transferrin receptor [Source:HGNC Symbol;Acc:HGNC:11763]
	P02787	P02787	TF	transferrin [Source:HGNC Symbol;Acc:HGNC:11740]
	P02788	P02788	LTF	lactotransferrin [Source:HGNC Symbol;Acc:HGNC:6720]
	P02790	P02790	HPX	hemopexin [Source:HGNC Symbol;Acc:HGNC:5171]
	P02792	P02792	FTL	ferritin light chain [Source:HGNC Symbol;Acc:HGNC:3999]
	P02794	P02794	FTH1	ferritin heavy chain 1 [Source:HGNC Symbol;Acc:HGNC:3976]
	P02795	P02795	MT2A	metallothionein 2A [Source:HGNC Symbol;Acc:HGNC:7406]
	P03372	P03372	ESR1	estrogen receptor 1 [Source:HGNC Symbol;Acc:HGNC:3467]
	P03886	P03886	MT-ND1	mitochondrially encoded NADH:ubiquinone oxidoreductase core subunit 1 [Source:HGNC Symbol;Acc:HGNC:7455]
	P03897	P03897	MT-ND3	mitochondrially encoded NADH:ubiquinone oxidoreductase core subunit 3 [Source:HGNC Symbol;Acc:HGNC:7458]
	P03915	P03915	MT-ND5	mitochondrially encoded NADH:ubiquinone oxidoreductase core subunit 5 [Source:HGNC Symbol;Acc:HGNC:7461]
	P03928	P03928	MT-ATP8	mitochondrially encoded ATP synthase membrane subunit 8 [Source:HGNC Symbol;Acc:HGNC:7415]
	P03950	P03950	ANG	angiogenin [Source:HGNC Symbol;Acc:HGNC:483]
	P03951	P03951	F11	coagulation factor XI [Source:HGNC Symbol;Acc:HGNC:3529]
	P03973	P03973	SLPI	secretory leukocyte peptidase inhibitor [Source:HGNC Symbol;Acc:HGNC:11092]
	P03989	P01889	HLA-B	HLA class I histocompatibility antigen, B alpha chain
	P04003	P04003	C4BPA	complement component 4 binding protein alpha [Source:HGNC Symbol;Acc:HGNC:1325]
	P04004	P04004	VTN	vitronectin [Source:HGNC Symbol;Acc:HGNC:12724]
	P04035	P04035	HMGCR	3-hydroxy-3-methylglutaryl-CoA reductase [Source:HGNC Symbol;Acc:HGNC:5006]
	P04040	P04040	CAT	catalase [Source:HGNC Symbol;Acc:HGNC:1516]
	P04049	P04049	RAF1	Raf-1 proto-oncogene, serine/threonine kinase [Source:HGNC Symbol;Acc:HGNC:9829]
	P04062	P04062	GBA	glucosylceramidase beta [Source:HGNC Symbol;Acc:HGNC:4177]
	P04066	P04066	FUCA1	alpha-L-fucosidase 1 [Source:HGNC Symbol;Acc:HGNC:4006]
	P04075	P04075	ALDOA	aldolase, fructose-bisphosphate A [Source:HGNC Symbol;Acc:HGNC:414]
	P04080	P04080	CSTB	cystatin B [Source:HGNC Symbol;Acc:HGNC:2482]
	P04083	P04083	ANXA1	annexin A1 [Source:HGNC Symbol;Acc:HGNC:533]
	P04114	P04114	APOB	apolipoprotein B [Source:HGNC Symbol;Acc:HGNC:603]
	P04150	P04150	NR3C1	nuclear receptor subfamily 3 group C member 1 [Source:HGNC Symbol;Acc:HGNC:7978]
	P04156	P04156	PRNP	prion protein [Source:HGNC Symbol;Acc:HGNC:9449]
	P04179	P04179	SOD2	superoxide dismutase 2 [Source:HGNC Symbol;Acc:HGNC:11180]
	P04181	P04181	OAT	ornithine aminotransferase [Source:HGNC Symbol;Acc:HGNC:8091]
	P04183	P04183	TK1	thymidine kinase 1 [Source:HGNC Symbol;Acc:HGNC:11830]
	P04196	P04196	HRG	histidine rich glycoprotein [Source:HGNC Symbol;Acc:HGNC:5181]
	P04216	P04216	THY1	Thy-1 cell surface antigen [Source:HGNC Symbol;Acc:HGNC:11801]
	P04217	P04217	A1BG	alpha-1-B glycoprotein [Source:HGNC Symbol;Acc:HGNC:5]
	P04222	P10321	HLA-C	HLA class I histocompatibility antigen, C alpha chain
	P04259	P04259	KRT6B	keratin 6B [Source:HGNC Symbol;Acc:HGNC:6444]
	P04264	P04264	KRT1	keratin 1 [Source:HGNC Symbol;Acc:HGNC:6412]
	P04271	P04271	S100B	S100 calcium binding protein B [Source:HGNC Symbol;Acc:HGNC:10500]
	P04275	P04275	VWF	von Willebrand factor [Source:HGNC Symbol;Acc:HGNC:12726]
	P04278	P04278	SHBG	sex hormone binding globulin [Source:HGNC Symbol;Acc:HGNC:10839]
	P04279	P04279	SEMG1	semenogelin 1 [Source:HGNC Symbol;Acc:HGNC:10742]
	P04350	P04350	TUBB4A	tubulin beta 4A class IVa [Source:HGNC Symbol;Acc:HGNC:20774]
	P04406	P04406	GAPDH	glyceraldehyde-3-phosphate dehydrogenase [Source:HGNC Symbol;Acc:HGNC:4141]
	P04424	P04424	ASL	argininosuccinate lyase [Source:HGNC Symbol;Acc:HGNC:746]
	P04439	P04439	HLA-A	major histocompatibility complex, class I, A [Source:HGNC Symbol;Acc:HGNC:4931]
	P04440	P04440	HLA-DPB1	major histocompatibility complex, class II, DP beta 1 [Source:HGNC Symbol;Acc:HGNC:4940]
	P04626	P04626	ERBB2	erb-b2 receptor tyrosine kinase 2 [Source:HGNC Symbol;Acc:HGNC:3430]
	P04632	P04632	CAPNS1	calpain small subunit 1 [Source:HGNC Symbol;Acc:HGNC:1481]
	P04637	P04637	TP53	tumor protein p53 [Source:HGNC Symbol;Acc:HGNC:11998]
	P04792	P04792	HSPB1	heat shock protein family B (small) member 1 [Source:HGNC Symbol;Acc:HGNC:5246]
	P04818	P04818	TYMS	thymidylate synthetase [Source:HGNC Symbol;Acc:HGNC:12441]
	P04843	P04843	RPN1	ribophorin I [Source:HGNC Symbol;Acc:HGNC:10381]
	P04844	P04844	RPN2	ribophorin II [Source:HGNC Symbol;Acc:HGNC:10382]
	P04899	P04899	GNAI2	G protein subunit alpha i2 [Source:HGNC Symbol;Acc:HGNC:4385]
	P04920	P04920	SLC4A2	solute carrier family 4 member 2 [Source:HGNC Symbol;Acc:HGNC:11028]
	P04921	P04921	GYPC	glycophorin C (Gerbich blood group) [Source:HGNC Symbol;Acc:HGNC:4704]
	P05019	P05019	IGF1	insulin like growth factor 1 [Source:HGNC Symbol;Acc:HGNC:5464]
	P05023	P05023	ATP1A1	ATPase Na+/K+ transporting subunit alpha 1 [Source:HGNC Symbol;Acc:HGNC:799]
	P05026	P05026	ATP1B1	ATPase Na+/K+ transporting subunit beta 1 [Source:HGNC Symbol;Acc:HGNC:804]
	P05060	P05060	CHGB	chromogranin B [Source:HGNC Symbol;Acc:HGNC:1930]
	P05062	P05062	ALDOB	aldolase, fructose-bisphosphate B [Source:HGNC Symbol;Acc:HGNC:417]
	P05067	P05067	APP	amyloid beta precursor protein [Source:HGNC Symbol;Acc:HGNC:620]
	P05089	P05089	ARG1	arginase 1 [Source:HGNC Symbol;Acc:HGNC:663]
	P05090	P05090	APOD	apolipoprotein D [Source:HGNC Symbol;Acc:HGNC:612]
	P05091	P05091	ALDH2	aldehyde dehydrogenase 2 family member [Source:HGNC Symbol;Acc:HGNC:404]
	P05106	P05106	ITGB3	integrin subunit beta 3 [Source:HGNC Symbol;Acc:HGNC:6156]
	P05107	P05107	ITGB2	integrin subunit beta 2 [Source:HGNC Symbol;Acc:HGNC:6155]
	P05109	P05109	S100A8	S100 calcium binding protein A8 [Source:HGNC Symbol;Acc:HGNC:10498]
	P05114	P05114	HMGN1	high mobility group nucleosome binding domain 1 [Source:HGNC Symbol;Acc:HGNC:4984]
	P05120	P05120	SERPINB2	serpin family B member 2 [Source:HGNC Symbol;Acc:HGNC:8584]
	P05121	P05121	SERPINE1	serpin family E member 1 [Source:HGNC Symbol;Acc:HGNC:8583]
	P05129	P05129	PRKCG	protein kinase C gamma [Source:HGNC Symbol;Acc:HGNC:9402]
	P05141	P05141	SLC25A5	solute carrier family 25 member 5 [Source:HGNC Symbol;Acc:HGNC:10991]
	P05154	P05154	SERPINA5	serpin family A member 5 [Source:HGNC Symbol;Acc:HGNC:8723]
	P05155	P05155	SERPING1	serpin family G member 1 [Source:HGNC Symbol;Acc:HGNC:1228]
	P05156	P05156	CFI	complement factor I [Source:HGNC Symbol;Acc:HGNC:5394]
	P05160	P05160	F13B	coagulation factor XIII B chain [Source:HGNC Symbol;Acc:HGNC:3534]
	P05161	P05161	ISG15	ISG15 ubiquitin like modifier [Source:HGNC Symbol;Acc:HGNC:4053]
	P05162	P05162	LGALS2	galectin 2 [Source:HGNC Symbol;Acc:HGNC:6562]
	P05164	P05164	MPO	myeloperoxidase [Source:HGNC Symbol;Acc:HGNC:7218]
	P05165	P05165	PCCA	propionyl-CoA carboxylase subunit alpha [Source:HGNC Symbol;Acc:HGNC:8653]
	P05166	P05166	PCCB	propionyl-CoA carboxylase subunit beta [Source:HGNC Symbol;Acc:HGNC:8654]
	P05186	P05186	ALPL	alkaline phosphatase, biomineralization associated [Source:HGNC Symbol;Acc:HGNC:438]
	P05198	P05198	EIF2S1	eukaryotic translation initiation factor 2 subunit alpha [Source:HGNC Symbol;Acc:HGNC:3265]
	P05204	P05204	HMGN2	high mobility group nucleosomal binding domain 2 [Source:HGNC Symbol;Acc:HGNC:4986]
	P05362	P05362	ICAM1	intercellular adhesion molecule 1 [Source:HGNC Symbol;Acc:HGNC:5344]
	P05386	P05386	RPLP1	ribosomal protein lateral stalk subunit P1 [Source:HGNC Symbol;Acc:HGNC:10372]
	P05387	P05387	RPLP2	ribosomal protein lateral stalk subunit P2 [Source:HGNC Symbol;Acc:HGNC:10377]
	P05388	P05388	RPLP0	ribosomal protein lateral stalk subunit P0 [Source:HGNC Symbol;Acc:HGNC:10371]
	P05412	P05412	JUN	Jun proto-oncogene, AP-1 transcription factor subunit [Source:HGNC Symbol;Acc:HGNC:6204]
	P05413	P05413	FABP3	fatty acid binding protein 3 [Source:HGNC Symbol;Acc:HGNC:3557]
	P05423	P05423	POLR3D	RNA polymerase III subunit D [Source:HGNC Symbol;Acc:HGNC:1080]
	P05455	P05455	SSB	small RNA binding exonuclease protection factor La [Source:HGNC Symbol;Acc:HGNC:11316]
	P05543	P05543	SERPINA7	serpin family A member 7 [Source:HGNC Symbol;Acc:HGNC:11583]
	P05546	P05546	SERPIND1	serpin family D member 1 [Source:HGNC Symbol;Acc:HGNC:4838]
	P05549	P05549	TFAP2A	transcription factor AP-2 alpha [Source:HGNC Symbol;Acc:HGNC:11742]
	P05556	P05556	ITGB1	integrin subunit beta 1 [Source:HGNC Symbol;Acc:HGNC:6153]
	P05771	P05771	PRKCB	protein kinase C beta [Source:HGNC Symbol;Acc:HGNC:9395]
	P05783	P05783	KRT18	keratin 18 [Source:HGNC Symbol;Acc:HGNC:6430]
	P05937	P05937	CALB1	calbindin 1 [Source:HGNC Symbol;Acc:HGNC:1434]
	P05976	P05976	MYL1	myosin light chain 1 [Source:HGNC Symbol;Acc:HGNC:7582]
	P05997	P05997	COL5A2	collagen type V alpha 2 chain [Source:HGNC Symbol;Acc:HGNC:2210]
	P06132	P06132	UROD	uroporphyrinogen decarboxylase [Source:HGNC Symbol;Acc:HGNC:12591]
	P06213	P06213	INSR	insulin receptor [Source:HGNC Symbol;Acc:HGNC:6091]
	P06241	P06241	FYN	FYN proto-oncogene, Src family tyrosine kinase [Source:HGNC Symbol;Acc:HGNC:4037]
	P06276	P06276	BCHE	butyrylcholinesterase [Source:HGNC Symbol;Acc:HGNC:983]
	P06280	P06280	GLA	galactosidase alpha [Source:HGNC Symbol;Acc:HGNC:4296]
	P06312	P06312	IGKV4-1	immunoglobulin kappa variable 4-1 [Source:HGNC Symbol;Acc:HGNC:5834]
	P06396	P06396	GSN	gelsolin [Source:HGNC Symbol;Acc:HGNC:4620]
	P06400	P06400	RB1	RB transcriptional corepressor 1 [Source:HGNC Symbol;Acc:HGNC:9884]
	P06401	P06401	PGR	progesterone receptor [Source:HGNC Symbol;Acc:HGNC:8910]
	P06454	P06454	PTMA	prothymosin alpha [Source:HGNC Symbol;Acc:HGNC:9623]
	P06493	P06493	CDK1	cyclin dependent kinase 1 [Source:HGNC Symbol;Acc:HGNC:1722]
	P06576	P06576	ATP5F1B	ATP synthase F1 subunit beta [Source:HGNC Symbol;Acc:HGNC:830]
	P06681	P06681	C2	complement C2 [Source:HGNC Symbol;Acc:HGNC:1248]
	P06702	P06702	S100A9	S100 calcium binding protein A9 [Source:HGNC Symbol;Acc:HGNC:10499]
	P06703	P06703	S100A6	S100 calcium binding protein A6 [Source:HGNC Symbol;Acc:HGNC:10496]
	P06727	P06727	APOA4	apolipoprotein A4 [Source:HGNC Symbol;Acc:HGNC:602]
	P06729	P06729	CD2	CD2 molecule [Source:HGNC Symbol;Acc:HGNC:1639]
	P06730	P06730	EIF4E	eukaryotic translation initiation factor 4E [Source:HGNC Symbol;Acc:HGNC:3287]
	P06731	P06731	CEACAM5	CEA cell adhesion molecule 5 [Source:HGNC Symbol;Acc:HGNC:1817]
	P06732	P06732	CKM	creatine kinase, M-type [Source:HGNC Symbol;Acc:HGNC:1994]
	P06733	P06733	ENO1	enolase 1 [Source:HGNC Symbol;Acc:HGNC:3350]
	P06737	P06737	PYGL	glycogen phosphorylase L [Source:HGNC Symbol;Acc:HGNC:9725]
	P06744	P06744	GPI	glucose-6-phosphate isomerase [Source:HGNC Symbol;Acc:HGNC:4458]
	P06746	P06746	POLB	DNA polymerase beta [Source:HGNC Symbol;Acc:HGNC:9174]
	P06748	P06748	NPM1	nucleophosmin 1 [Source:HGNC Symbol;Acc:HGNC:7910]
	P06753	P06753	TPM3	tropomyosin 3 [Source:HGNC Symbol;Acc:HGNC:12012]
	P06756	P06756	ITGAV	integrin subunit alpha V [Source:HGNC Symbol;Acc:HGNC:6150]
	P06858	P06858	LPL	lipoprotein lipase [Source:HGNC Symbol;Acc:HGNC:6677]
	P06865	P06865	HEXA	hexosaminidase subunit alpha [Source:HGNC Symbol;Acc:HGNC:4878]
	P07093	P07093	SERPINE2	serpin family E member 2 [Source:HGNC Symbol;Acc:HGNC:8951]
	P07099	P07099	EPHX1	epoxide hydrolase 1 [Source:HGNC Symbol;Acc:HGNC:3401]
	P07108	P07108	DBI	diazepam binding inhibitor, acyl-CoA binding protein [Source:HGNC Symbol;Acc:HGNC:2690]
	P07148	P07148	FABP1	fatty acid binding protein 1 [Source:HGNC Symbol;Acc:HGNC:3555]
	P07195	P07195	LDHB	lactate dehydrogenase B [Source:HGNC Symbol;Acc:HGNC:6541]
	P07196	P07196	NEFL	neurofilament light chain [Source:HGNC Symbol;Acc:HGNC:7739]
	P07197	P07197	NEFM	neurofilament medium chain [Source:HGNC Symbol;Acc:HGNC:7734]
	P07199	P07199	CENPB	centromere protein B [Source:HGNC Symbol;Acc:HGNC:1852]
	P07203	P07203	GPX1	glutathione peroxidase 1 [Source:HGNC Symbol;Acc:HGNC:4553]
	P07225	P07225	PROS1	protein S [Source:HGNC Symbol;Acc:HGNC:9456]
	P07237	P07237	P4HB	prolyl 4-hydroxylase subunit beta [Source:HGNC Symbol;Acc:HGNC:8548]
	P07288	P07288	KLK3	kallikrein related peptidase 3 [Source:HGNC Symbol;Acc:HGNC:6364]
	P07305	P07305	H1-0	H1.0 linker histone [Source:HGNC Symbol;Acc:HGNC:4714]
	P07311	P07311	ACYP1	acylphosphatase 1 [Source:HGNC Symbol;Acc:HGNC:179]
	P07320	P07320	CRYGD	crystallin gamma D [Source:HGNC Symbol;Acc:HGNC:2411]
	P07332	P07332	FES	FES proto-oncogene, tyrosine kinase [Source:HGNC Symbol;Acc:HGNC:3657]
	P07333	P07333	CSF1R	colony stimulating factor 1 receptor [Source:HGNC Symbol;Acc:HGNC:2433]
	P07339	P07339	CTSD	cathepsin D [Source:HGNC Symbol;Acc:HGNC:2529]
	P07355	P07355	ANXA2	annexin A2 [Source:HGNC Symbol;Acc:HGNC:537]
	P07357	P07357	C8A	complement C8 alpha chain [Source:HGNC Symbol;Acc:HGNC:1352]
	P07358	P07358	C8B	complement C8 beta chain [Source:HGNC Symbol;Acc:HGNC:1353]
	P07384	P07384	CAPN1	calpain 1 [Source:HGNC Symbol;Acc:HGNC:1476]
	P07437	P07437	TUBB	tubulin beta class I [Source:HGNC Symbol;Acc:HGNC:20778]
	P07476	P07476	IVL	involucrin [Source:HGNC Symbol;Acc:HGNC:6187]
	P07585	P07585	DCN	decorin [Source:HGNC Symbol;Acc:HGNC:2705]
	P07602	P07602	PSAP	prosaposin [Source:HGNC Symbol;Acc:HGNC:9498]
	P07686	P07686	HEXB	hexosaminidase subunit beta [Source:HGNC Symbol;Acc:HGNC:4879]
	P07711	P07711	CTSL	cathepsin L [Source:HGNC Symbol;Acc:HGNC:2537]
	P07737	P07737	PFN1	profilin 1 [Source:HGNC Symbol;Acc:HGNC:8881]
	P07738	P07738	BPGM	bisphosphoglycerate mutase [Source:HGNC Symbol;Acc:HGNC:1093]
	P07741	P07741	APRT	adenine phosphoribosyltransferase [Source:HGNC Symbol;Acc:HGNC:626]
	P07814	P07814	EPRS1	glutamyl-prolyl-tRNA synthetase 1 [Source:HGNC Symbol;Acc:HGNC:3418]
	P07858	P07858	CTSB	cathepsin B [Source:HGNC Symbol;Acc:HGNC:2527]
	P07864	P07864	LDHC	lactate dehydrogenase C [Source:HGNC Symbol;Acc:HGNC:6544]
	P07900	P07900	HSP90AA1	heat shock protein 90 alpha family class A member 1 [Source:HGNC Symbol;Acc:HGNC:5253]
	P07902	P07902	GALT	galactose-1-phosphate uridylyltransferase [Source:HGNC Symbol;Acc:HGNC:4135]
	P07910	P07910	HNRNPC	heterogeneous nuclear ribonucleoprotein C [Source:HGNC Symbol;Acc:HGNC:5035]
	P07919	P07919	UQCRH	ubiquinol-cytochrome c reductase hinge protein [Source:HGNC Symbol;Acc:HGNC:12590]
	P07942	P07942	LAMB1	laminin subunit beta 1 [Source:HGNC Symbol;Acc:HGNC:6486]
	P07947	P07947	YES1	YES proto-oncogene 1, Src family tyrosine kinase [Source:HGNC Symbol;Acc:HGNC:12841]
	P07948	P07948	LYN	LYN proto-oncogene, Src family tyrosine kinase [Source:HGNC Symbol;Acc:HGNC:6735]
	P07949	P07949	RET	ret proto-oncogene [Source:HGNC Symbol;Acc:HGNC:9967]
	P07951	P07951	TPM2	tropomyosin 2 [Source:HGNC Symbol;Acc:HGNC:12011]
	P07954	P07954	FH	fumarate hydratase [Source:HGNC Symbol;Acc:HGNC:3700]
	P07992	P07992	ERCC1	ERCC excision repair 1, endonuclease non-catalytic subunit [Source:HGNC Symbol;Acc:HGNC:3433]
	P07996	P07996	THBS1	thrombospondin 1 [Source:HGNC Symbol;Acc:HGNC:11785]
	P08047	P08047	SP1	Sp1 transcription factor [Source:HGNC Symbol;Acc:HGNC:11205]
	P08069	P08069	IGF1R	insulin like growth factor 1 receptor [Source:HGNC Symbol;Acc:HGNC:5465]
	P08123	P08123	COL1A2	collagen type I alpha 2 chain [Source:HGNC Symbol;Acc:HGNC:2198]
	P08133	P08133	ANXA6	annexin A6 [Source:HGNC Symbol;Acc:HGNC:544]
	P08134	P08134	RHOC	ras homolog family member C [Source:HGNC Symbol;Acc:HGNC:669]
	P08138	P08138	NGFR	nerve growth factor receptor [Source:HGNC Symbol;Acc:HGNC:7809]
	P08151	P08151	GLI1	GLI family zinc finger 1 [Source:HGNC Symbol;Acc:HGNC:4317]
	P08174	P08174	CD55	CD55 molecule (Cromer blood group) [Source:HGNC Symbol;Acc:HGNC:2665]
[truncated: 10,227 more rows]
