# Supplementary material for: DEAD box RNA helicases are pervasive protein kinase interactors and activators
Source: HighWire-hosted journal article supplement (doi:10.1101/gr.278264.123), 2024-06-01
Supplement: Supplemental_Table_S2_.xlsx [file Supplemental_Table_S2_.xlsx]

## Sheet: Description
	DDX/DHX IP-MS LFQ results. Three days after transfection of HEK293T cells, FLAG-tagged DDX/DHX helicases were immunoprecipitated in triplicates and subjected to quantitative mass spectrometry to identify bound proteins. As negative control, we used FLAG-tagged GFP

## Sheet: DDX IP-MS LFQ
	Protein_IDs	Majority_protein_IDs	Protein_names	Number_of_proteins	Gene_names	Fasta_headers	LFQ_intensity_DDX1_R1	LFQ_intensity_DDX1_R2	LFQ_intensity_DDX1_R3	LFQ_intensity_DDX11_R1	LFQ_intensity_DDX11_R2	LFQ_intensity_DDX11_R3	LFQ_intensity_DHX15_R1	LFQ_intensity_DHX15_R2	LFQ_intensity_DHX15_R3	LFQ_intensity_DHX16_R1	LFQ_intensity_DHX16_R2	LFQ_intensity_DHX16_R3	LFQ_intensity_DDX19A_R1	LFQ_intensity_DDX19A_R2	LFQ_intensity_DDX19A_R3	LFQ_intensity_EIF4A1_R1	LFQ_intensity_EIF4A1_R2	LFQ_intensity_EIF4A1_R3	LFQ_intensity_DDX23_R1	LFQ_intensity_DDX23_R2	LFQ_intensity_DDX23_R3	LFQ_intensity_DDX24_R1	LFQ_intensity_DDX24_R2	LFQ_intensity_DDX24_R3	LFQ_intensity_DDX27_R1	LFQ_intensity_DDX27_R2	LFQ_intensity_DDX27_R3	LFQ_intensity_DDX3X_R1	LFQ_intensity_DDX3X_R2	LFQ_intensity_DDX3X_R3	LFQ_intensity_DHX30_R1	LFQ_intensity_DHX30_R2	LFQ_intensity_DHX30_R3	LFQ_intensity_DDX31_R1	LFQ_intensity_DDX31_R2	LFQ_intensity_DDX31_R3	LFQ_intensity_DHX35_R1	LFQ_intensity_DHX35_R2	LFQ_intensity_DHX35_R3	LFQ_intensity_DHX38_R1	LFQ_intensity_DHX38_R2	LFQ_intensity_DHX38_R3	LFQ_intensity_DDX39A_R1
	P09874	P09874	Poly [ADP-ribose] polymerase 1	2	PARP1	sp|P09874|PARP1_HUMAN Poly [ADP-ribose] polymerase 1 OS=Homo sapiens OX=9606 GN=PARP1 PE=1 SV=4	33.5679	33.9153	33.7703	33.3845	33.2442	33.1811	33.2313	34.0315	33.1633	33.5708	33.4757	33.5402	34.4556	34.2167	33.7757	33.5956	34.1674	34.0403	33.4082	33.5469	33.5627	33.5613	33.5789	33.7819	33.9465	33.3059	34.3472	33.379	33.676	33.2954	33.6719	33.5154	33.5667	33.5772	33.6491	34.0124	33.3798	34.3794	33.1932	33.6027	33.3065	33.517	33.5665
	P63261	P63261	Actin, cytoplasmic 2;Actin, cytoplasmic 2, N-terminally processed	1	ACTG1	sp|P63261|ACTG_HUMAN Actin, cytoplasmic 2 OS=Homo sapiens OX=9606 GN=ACTG1 PE=1 SV=1	33.367	33.9331	33.8921	34.5329	34.1356	34.2562	33.899	33.1075	33.4476	33.7677	33.8248	34.1419	33.0179	32.3513	32.9651	32.9796	32.8767	32.7571	33.4322	33.2988	33.0608	32.9575	32.8234	33.5043	34.1613	33.2268	33.0834	33.3203	32.7381	33.1045	34.0235	33.6979	34.2319	33.0368	32.8762	32.5482	33.9294	32.3949	33.4815	34.0669	34.079	34.5809	33.1844
	Q04837	Q04837	Single-stranded DNA-binding protein, mitochondrial	1	SSBP1	sp|Q04837|SSBP_HUMAN Single-stranded DNA-binding protein, mitochondrial OS=Homo sapiens OX=9606 GN=SSBP1 PE=1 SV=1	32.3871	32.9037	32.9395	32.3429	32.4448	32.3033	32.0021	32.7131	32.0828	32.7703	32.1211	32.7353	33.1689	32.9804	32.6857	32.6898	32.6276	32.6103	32.3472	32.3095	32.5101	32.0405	32.199	33.0044	32.6063	32.3785	33.2089	32.2107	32.5881	32.4774	31.8215	32.2869	32.1632	32.6319	32.7589	32.8136	32.3201	33.3998	32.5578	32.614	32.2334	32.1161	32.2581
	Q16777	Q16777	Histone H2A type 2-C	1	HIST2H2AC	sp|Q16777|H2A2C_HUMAN Histone H2A type 2-C OS=Homo sapiens OX=9606 GN=HIST2H2AC PE=1 SV=4	32.2265	30.3896	30.5828	30.6388	31.4839	31.1301	30.3514	31.1588	30.9053	31.5606	30.6028	29.7896	32.6196	30.929	33.0949	33.001	31.5656	31.8726	31.4374	31.1063	30.7272	31.3366	32.4004	30.3788	30.2333	30.3906	31.5253	32.0534	31.6243	31.7527	31.0563	32.201	30.7408	31.5372	30.3663	30.7273	30.6778	32.1833	31.5352	30.7933	30.3261	32.8406	32.9139
	P58876	P58876;Q99879;Q93079;Q5QNW6;P62807	Histone H2B type 1-D;Histone H2B type 1-M;Histone H2B type 1-H;Histone H2B type 2-F;Histone H2B type 1-C/E/F/G/I	5	HIST1H2BD	sp|P58876|H2B1D_HUMAN Histone H2B type 1-D OS=Homo sapiens OX=9606 GN=HIST1H2BD PE=1 SV=2;sp|Q99879|H2B1M_HUMAN Histone H2B type 1-M OS=Homo sapiens OX=9606 GN=HIST1H2BM PE=1 SV=3;sp|Q93079|H2B1H_HUMAN Histone H2B type 1-H OS=Homo sapiens OX=9606 GN=HIST1H	32.0379	30.7848	30.8694	31.7097	32.6373	31.517	29.3709	30.2006	29.5973	30.6371	30.6425	30.4626	30.7129	30.7664	32.9402	32.3831	31.1552	30.9604	31.7107	30.2359	29.4487	30.6201	31.8564	30.2722	31.9099	31.3835	31.7652	31.8702	30.4493	30.3095	32.4094	33.0287	31.3622	31.9575	31.0152	31.0289	30.1586	32.1249	30.6744	30.2141	30.8753	30.9498	31.5437
	Q14103	Q14103	Heterogeneous nuclear ribonucleoprotein D0	1	HNRNPD	sp|Q14103|HNRPD_HUMAN Heterogeneous nuclear ribonucleoprotein D0 OS=Homo sapiens OX=9606 GN=HNRNPD PE=1 SV=1	31.6886	31.9322	31.7927	31.8524	31.5456	31.5349	31.5603	32.5718	31.6724	32.049	31.7712	31.927	32.6975	32.3245	31.8717	32.291	32.2964	32.3828	31.8422	32.115	32.1264	31.9138	32.0203	31.9525	31.9449	31.5364	32.1926	31.6563	32.0067	31.8893	31.8918	31.7748	31.7502	32.0469	32.1626	32.4967	31.6423	32.5784	31.5602	32.06	31.6471	30.6329	32.0306
	O75891	O75891	Cytosolic 10-formyltetrahydrofolate dehydrogenase	1	ALDH1L1	sp|O75891|AL1L1_HUMAN Cytosolic 10-formyltetrahydrofolate dehydrogenase OS=Homo sapiens OX=9606 GN=ALDH1L1 PE=1 SV=2	31.6759	25.7636	31.8566	30.527	30.1421	30.4752	30.8117	31.4934	31.4513	30.4667	30.5019	30.6068	31.9549	30.0144	30.5767	30.1236	32.0712	31.7673	31.4674	30.8918	31.5957	30.9013	31.6384	30.6202	30.6912	29.9835	29.9943	31.5817	32.0185	31.3138	31.3929	30.8808	30.541	31.067	30.7671	30.8631	31.0263	31.9858	30.5381	30.4848	30.4578	30.8183	31.8238
	P62805	P62805	Histone H4	1	HIST1H4A	sp|P62805|H4_HUMAN Histone H4 OS=Homo sapiens OX=9606 GN=HIST1H4A PE=1 SV=2	31.627	30.244	30.548	30.4215	31.1405	30.5848	29.1904	29.7717	30.015	30.232	29.8182	29.2011	30.9232	30.535	32.6158	32.2681	31.2177	31.4244	31.2287	30.2141	30.2929	30.8026	32.0186	30.2911	30.2371	29.8595	30.879	31.5408	31.0316	30.8736	30.9254	31.8176	30.3024	31.1539	30.1428	30.3754	30.1935	32.0556	31.0696	30.0133	29.6119	30.248	32.3408
	P60660	P60660	Myosin light polypeptide 6	1	MYL6	sp|P60660|MYL6_HUMAN Myosin light polypeptide 6 OS=Homo sapiens OX=9606 GN=MYL6 PE=1 SV=2	31.1628	31.8612	31.6634	31.6327	31.0896	31.4514	32.0259	31.0299	31.4135	30.7614	30.9809	31.5124	30.5949	30.0922	31.0096	31.0781	30.7418	30.7997	31.5204	30.9535	31.0484	30.6821	30.5969	31.0462	31.4094	30.121	29.7875	31.0911	30.5896	30.9393	31.7493	31.1265	31.4573	30.5133	30.1292	29.7206	32.1713	30.2649	31.6597	31.505	31.3758	31.0899	31.043
	P22626	P22626	Heterogeneous nuclear ribonucleoproteins A2/B1	1	HNRNPA2B1	sp|P22626|ROA2_HUMAN Heterogeneous nuclear ribonucleoproteins A2/B1 OS=Homo sapiens OX=9606 GN=HNRNPA2B1 PE=1 SV=2	31.147	31.1357	31.0906	30.8174	30.8382	30.9004	30.9525	31.8862	31.0234	31.1718	30.8837	31.2597	32.0388	31.685	31.8133	31.4203	31.7032	31.7942	31.0656	30.9674	31.0413	31.262	31.5128	31.5105	31.0529	30.7738	31.5353	31.4285	31.6147	31.3016	30.7814	31.3655	31.2139	31.1515	31.2015	31.2485	30.9093	31.782	30.7958	31.1364	30.7229	31.4682	31.5502
	Q71DI3	Q71DI3	Histone H3.2	1	HIST2H3A	sp|Q71DI3|H32_HUMAN Histone H3.2 OS=Homo sapiens OX=9606 GN=HIST2H3A PE=1 SV=3	31.0871	29.8061	29.8047	30.86	31.5122	30.795	28.4422	29.2775	29.0722	29.9695	29.7481	29.9427	30.5825	30.3332	32.1498	29.5538	29.9154	30.0723	31.1752	29.5019	29.7706	29.9773	31.1059	29.902	30.4112	30.231	31.7454	30.5747	29.8808	29.6698	30.4847	31.8251	30.8428	30.6968	30.2256	30.3709	29.921	31.9327	29.9714	30.0598	29.9306	31.212	31.4381
	P35579	P35579	Myosin-9	2	MYH9	sp|P35579|MYH9_HUMAN Myosin-9 OS=Homo sapiens OX=9606 GN=MYH9 PE=1 SV=4	31.032	31.1336	31.3715	31.9177	31.3717	31.7685	31.6847	30.7159	31.5842	31.5289	31.7261	31.0948	30.3385	29.7407	30.4896	30.8992	30.4954	30.6154	30.859	31.0224	30.5996	30.6036	30.5455	30.2116	31.5403	30.4281	29.0704	30.7629	30.3043	30.9281	31.6794	31.6258	31.6716	30.5521	30.087	29.5388	31.6147	29.5942	31.6835	31.8408	31.8792	30.4358	31.0717
	P35580	P35580	Myosin-10	1	MYH10	sp|P35580|MYH10_HUMAN Myosin-10 OS=Homo sapiens OX=9606 GN=MYH10 PE=1 SV=3	30.771	31.0329	31.1535	31.5729	30.9856	31.4385	31.2186	30.2664	31.1887	30.939	31.1041	30.7678	29.906	29.5505	30.3385	30.4087	30.1802	30.124	30.7466	30.6412	30.3898	30.2756	30.2945	30.2738	31.1871	29.8636	29.0951	30.5282	29.9235	30.5028	31.1344	31.2962	31.5006	29.982	29.7609	29.0259	31.5169	29.4767	31.3119	31.5571	31.5978	30.9095	30.5556
	Q07666	Q07666	KH domain-containing, RNA-binding, signal transduction-associated protein 1	1	KHDRBS1	sp|Q07666|KHDR1_HUMAN KH domain-containing, RNA-binding, signal transduction-associated protein 1 OS=Homo sapiens OX=9606 GN=KHDRBS1 PE=1 SV=1	30.7039	30.7072	30.7591	30.8632	30.546	30.5631	30.2789	31.1752	30.4782	30.4713	30.8297	30.9789	30.5086	30.4563	30.07	30.287	31.1456	31.0404	30.5302	30.7717	30.6439	30.6572	30.6808	30.4603	31.2765	30.7353	31.0688	31.2155	31.313	31.1736	30.671	30.8316	30.8741	30.3062	30.5202	30.8345	30.2924	31.3217	30.2697	30.1437	30.1699	30.376	30.7516
	P26583	P26583	High mobility group protein B2	1	HMGB2	sp|P26583|HMGB2_HUMAN High mobility group protein B2 OS=Homo sapiens OX=9606 GN=HMGB2 PE=1 SV=2	30.4916	30.1151	30.3622	29.9745	31.1205	30.4803	29.6458	30.6144	29.7776	31.4993	31.5394	30.6498	30.9945	30.7151	30.3817	30.4002	30.2529	30.3935	30.5088	30.484	30.251	30.4259	30.4542	30.0026	31.0735	30.7012	30.6518	29.9698	30.0698	30.2485	31.0625	30.9482	30.4363	31.1903	31.3917	31.41	29.6211	29.9379	30.366	30.9811	31.5015	30.3196	30.0049
	P09651	P09651	Heterogeneous nuclear ribonucleoprotein A1;Heterogeneous nuclear ribonucleoprotein A1, N-terminally processed	1	HNRNPA1	sp|P09651|ROA1_HUMAN Heterogeneous nuclear ribonucleoprotein A1 OS=Homo sapiens OX=9606 GN=HNRNPA1 PE=1 SV=5	30.4824	30.0707	30.2885	30.777	30.6778	30.6102	30.402	31.1921	30.5118	30.8439	30.7634	30.705	31.3869	30.8804	30.9247	31.0528	30.9448	31.1536	30.304	30.5806	30.5818	30.8568	31.0251	30.3621	30.7427	30.5918	30.5701	30.9198	31.1404	31.0055	30.626	31.1591	30.4109	30.9368	30.8336	30.9434	30.062	30.8994	30.448	30.4731	30.2964	29.2011	31.1579
	Q00839	Q00839	Heterogeneous nuclear ribonucleoprotein U	1	HNRNPU	sp|Q00839|HNRPU_HUMAN Heterogeneous nuclear ribonucleoprotein U OS=Homo sapiens OX=9606 GN=HNRNPU PE=1 SV=6	30.4227	30.4932	30.2552	30.3959	30.6644	30.5543	30.0517	30.7912	30.2568	30.5561	30.6088	31.1224	31.357	31.1056	30.971	30.671	30.8715	30.9071	30.4689	30.4285	30.5811	30.602	30.906	30.8205	30.6656	30.5234	31.4784	30.8382	31.0416	30.676	30.5645	30.8788	30.8042	30.8186	31.0667	31.2466	30.1371	31.2098	29.9989	30.2956	30.5533	31.1354	30.8557
	P61978	P61978	Heterogeneous nuclear ribonucleoprotein K	1	HNRNPK	sp|P61978|HNRPK_HUMAN Heterogeneous nuclear ribonucleoprotein K OS=Homo sapiens OX=9606 GN=HNRNPK PE=1 SV=1	30.1931	30.289	30.2392	30.1072	29.8496	29.9258	30.7436	31.6643	30.6573	30.5773	30.4457	30.1438	31.2705	30.6394	30.339	30.618	30.9354	30.9695	30.0785	30.5504	30.3107	30.5897	30.5559	30.0467	30.2655	29.722	30.0982	30.5724	31.0871	30.8568	30.6892	30.2528	30.1683	30.3656	30.4733	30.8769	29.8132	30.897	30.231	30.4393	30.2134	29.123	30.5738
	P27694	P27694	Replication protein A 70 kDa DNA-binding subunit;Replication protein A 70 kDa DNA-binding subunit, N-terminally processed	1	RPA1	sp|P27694|RFA1_HUMAN Replication protein A 70 kDa DNA-binding subunit OS=Homo sapiens OX=9606 GN=RPA1 PE=1 SV=2	30.1271	29.9995	30.1405	29.5471	29.5664	29.481	29.6887	30.5646	29.9218	30.027	29.7828	29.4285	30.6131	30.2091	29.8952	30.6444	30.5513	30.5687	29.531	29.8711	29.9366	29.4977	29.5813	29.5239	30.2123	29.662	29.9713	29.7667	30.3698	30.0927	29.6683	29.63	29.5235	29.7014	29.6683	30.0141	29.3735	30.4116	29.7934	29.6648	29.4288	28.2438	30.0691
	P68104	P68104;Q5VTE0	Elongation factor 1-alpha 1;Putative elongation factor 1-alpha-like 3	2	EEF1A1	sp|P68104|EF1A1_HUMAN Elongation factor 1-alpha 1 OS=Homo sapiens OX=9606 GN=EEF1A1 PE=1 SV=1;sp|Q5VTE0|EF1A3_HUMAN Putative elongation factor 1-alpha-like 3 OS=Homo sapiens OX=9606 GN=EEF1A1P5 PE=5 SV=1	30.0112	30.1499	29.9773	29.6311	30.3532	29.9668	30.0401	29.8792	30.1029	29.9856	30.2126	29.8107	29.8302	30.1802	29.6777	29.7694	29.8999	30.1117	29.7211	29.5001	30.0188	30.1501	29.7985	30.0013	29.7023	30.9197	29.3788	30.05	30.0135	30.2135	29.6698	29.2702	29.4504	29.758	29.5847	29.3412	30.2159	29.8522	30.161	29.9615	29.7241	29.4922	30.6281
	P06748	P06748	Nucleophosmin	1	NPM1	sp|P06748|NPM_HUMAN Nucleophosmin OS=Homo sapiens OX=9606 GN=NPM1 PE=1 SV=2	29.8919	29.5611	29.5762	30.4729	30.2191	30.0317	29.5415	29.7608	29.4625	30.1312	30.1693	30.642	29.3754	29.4497	30.22	30.3934	29.3052	29.3422	30.1628	30.0589	30.0974	31.3017	31.4337	31.5464	30.9283	29.903	31.0541	29.6927	29.4538	29.3041	30.1396	30.5407	30.3962	29.6959	29.1774	28.4525	29.5377	29.7462	29.577	30.4257	30.1776	29.5433	29.5902
	P18887	P18887	DNA repair protein XRCC1	1	XRCC1	sp|P18887|XRCC1_HUMAN DNA repair protein XRCC1 OS=Homo sapiens OX=9606 GN=XRCC1 PE=1 SV=2	29.8746	29.9997	30.0477	29.9103	29.8607	30.0402	29.1793	30.2814	29.3077	30.1965	29.9986	30.2054	30.3986	29.9964	29.5409	29.8138	30.2941	30.0648	29.2383	29.6342	29.5322	29.2711	29.3567	29.0678	30.5084	30.076	30.8197	29.3188	29.6327	29.4359	30.5843	30.2404	29.903	30.1636	30.1472	30.5413	29.3939	30.2503	29.3922	30.0453	29.7365	29.1959	29.5791
	Q8N257	Q8N257	Histone H2B type 3-B	1	HIST3H2BB	sp|Q8N257|H2B3B_HUMAN Histone H2B type 3-B OS=Homo sapiens OX=9606 GN=HIST3H2BB PE=1 SV=3	29.8396	28.8291	28.2711	29.0298	29.2418	28.5067	25.8804	26.8644	26.1709	23.9121	26.8947	27.6345	26.6702	28.1527	30.2027	29.3769	28.718	27.8777	29.2751	26.7679	27.1338	27.9871	28.6313	27.7562	28.7427	27.9465	29.3251	29.71	27.5356	27.4469	27.9711	29.831	28.5116	27.8449	27.6589	27.3554	27.7069	29.1258	27.8318	26.9659	27.422	29.3337	28.6323
	P35637	P35637	RNA-binding protein FUS	1	FUS	sp|P35637|FUS_HUMAN RNA-binding protein FUS OS=Homo sapiens OX=9606 GN=FUS PE=1 SV=1	29.7928	29.9768	29.9617	29.659	30.0809	29.7167	29.7754	30.3941	29.6507	30.2417	30.0488	29.946	30.2301	30.0322	29.7142	29.5092	30.1968	30.1612	30.19	29.9698	30.2021	29.8798	30.1288	30.1606	30.3544	29.5994	30.5934	30.5899	30.9452	30.3078	30.173	30.0898	30.2632	30.037	30.2374	30.4577	29.6107	30.5738	29.645	29.5425	29.9843	28.83	29.7968
	Q92499	Q92499	ATP-dependent RNA helicase DDX1	1	DDX1	sp|Q92499|DDX1_HUMAN ATP-dependent RNA helicase DDX1 OS=Homo sapiens OX=9606 GN=DDX1 PE=1 SV=2	29.6519	29.5493	29.667	27.8108	27.8362	27.7541	27.8874	28.5963	28.1506	28.5159	28.2759	27.9694	27.9797	27.4126	27.4612	29.0328	28.8781	29.0126	27.3198	27.7279	27.6046	27.3805	27.5319	27.1873	28.2575	27.7871	28.0666	28.6106	29.0099	28.9006	28.2449	28.1077	27.9091	28.6334	28.5038	28.9719	27.3714	28.048	27.6981	28.0762	27.9632	27.0112	28.6378
	Q92804	Q92804	TATA-binding protein-associated factor 2N	1	TAF15	sp|Q92804|RBP56_HUMAN TATA-binding protein-associated factor 2N OS=Homo sapiens OX=9606 GN=TAF15 PE=1 SV=1	29.6208	29.4154	29.5109	29.5797	30.0038	29.4923	29.2945	30.2147	29.2258	30.3542	30.1072	29.8649	30.5096	29.5295	29.4709	30.9109	29.976	29.797	29.2232	29.6009	29.4855	29.718	29.7887	29.5334	30.3106	29.8772	30.8128	29.746	29.7483	29.3313	30.4386	29.8984	30.095	29.5777	29.7061	30.2665	29.201	29.8982	29.1579	29.77	30.0614	29.0771	29.513
	P16403	P16403	Histone H1.2	1	HIST1H1C	sp|P16403|H12_HUMAN Histone H1.2 OS=Homo sapiens OX=9606 GN=HIST1H1C PE=1 SV=2	29.6142	28.5107	28.2038	27.901	28.662	28.059	27.5144	27.8617	27.4923	28.0993	28.3578	28.7877	28.7606	28.9158	29.8839	28.4572	28.4467	28.3238	29.2746	28.6205	28.8206	28.8543	29.088	29.0491	29.095	28.6003	29.5419	28.6264	28.0865	27.8633	29.0873	29.3167	28.8419	28.736	28.0112	28.4645	27.8408	29.3327	28.0938	27.6153	28.2733	29.119	29.0764
	P12956	P12956	X-ray repair cross-complementing protein 6	1	XRCC6	sp|P12956|XRCC6_HUMAN X-ray repair cross-complementing protein 6 OS=Homo sapiens OX=9606 GN=XRCC6 PE=1 SV=2	29.5836	29.2709	29.5004	28.8677	29.0293	29.0202	29.2867	30.0482	29.5928	29.3848	29.2295	28.702	30.2295	29.5347	29.1865	29.9829	29.74	30.0314	28.7011	29.3986	29.1634	28.9604	28.7712	28.2095	29.4052	29.1333	29.0688	28.8036	29.2873	29.2288	29.1961	29.1146	28.8148	29.2232	28.9006	29.2436	28.8007	29.6886	29.6552	29.0172	28.6734	27.6964	29.2284
	P08670	P08670	Vimentin	1	VIM	sp|P08670|VIME_HUMAN Vimentin OS=Homo sapiens OX=9606 GN=VIM PE=1 SV=4	29.5829	29.1825	29.6288	29.9736	29.3286	29.7288	29.5816	28.7813	29.5651	29.1048	29.4481	28.4804	29.1589	28.6764	29.8215	29.8199	29.3604	29.4294	29.0776	28.9866	28.6214	29.3048	29.4361	28.4669	29.5438	28.2056	27.512	29.0695	28.55	29.1061	29.2547	29.5215	28.9829	29.4741	29.0657	28.4118	29.5657	28.469	29.7604	29.4205	29.362	28.9395	29.9239
	P68371	P68371	Tubulin beta-4B chain	1	TUBB4B	sp|P68371|TBB4B_HUMAN Tubulin beta-4B chain OS=Homo sapiens OX=9606 GN=TUBB4B PE=1 SV=1	29.5667	29.6502	29.6869	30.28	30.2972	30.1992	29.4158	29.2081	29.4789	29.7782	29.6784	29.4633	29.2165	29.3527	29.2776	29.4097	29.7186	29.6097	29.5288	29.4364	29.6674	29.9521	29.8229	29.9869	29.3624	29.6513	29.0824	29.7629	29.5832	29.7217	29.2531	29.51	29.4918	30.3418	30.4369	30.626	30.4609	30.8036	30.2782	29.8703	29.6333	29.4499	30.148
	Q9BZ95	Q9BZ95	Histone-lysine N-methyltransferase NSD3	1	WHSC1L1	sp|Q9BZ95|NSD3_HUMAN Histone-lysine N-methyltransferase NSD3 OS=Homo sapiens OX=9606 GN=NSD3 PE=1 SV=1	29.5255	29.3172	29.4066	28.786	28.9508	28.7015	29.2518	29.9494	29.1593	29.4016	29.1813	29.6438	29.8601	29.5331	29.4706	30.3429	29.6242	29.7671	29.5998	29.8029	30.3707	29.7009	29.5732	29.3692	29.1837	28.8214	29.6652	29.8317	30.4256	31.6279	29.2181	29.033	28.5511	29.5932	29.7024	29.917	28.7532	29.7552	28.9499	28.9555	28.1442	28.3051	29.1247
	P13010	P13010	X-ray repair cross-complementing protein 5	1	XRCC5	sp|P13010|XRCC5_HUMAN X-ray repair cross-complementing protein 5 OS=Homo sapiens OX=9606 GN=XRCC5 PE=1 SV=3	29.4663	29.2862	29.2719	28.7903	28.6542	28.6811	29.0464	29.7507	29.1747	29.0718	28.7654	28.4594	29.8758	29.5729	29.1035	29.0879	29.5615	29.593	28.807	29.2653	29.1121	28.7734	28.5823	28.3146	29.0974	28.8011	29.3102	28.4991	29.0445	28.6223	29.0088	28.8174	28.6874	28.7847	28.7945	29.1246	28.9525	29.6483	29.2261	28.8392	28.581	27.2538	29.2057
	P50402	P50402	Emerin	1	EMD	sp|P50402|EMD_HUMAN Emerin OS=Homo sapiens OX=9606 GN=EMD PE=1 SV=1	29.4598	29.6925	29.5979	28.8645	28.6119	28.8613	28.2469	28.8748	28.2141	29.2452	29.0453	29.6312	29.2676	29.0814	28.4871	29.256	29.5124	29.3278	28.6357	28.63	28.7011	28.3814	28.3278	28.8377	29.4782	28.9516	30.379	27.628	27.9764	27.4644	29.2036	28.9558	29.2711	28.1309	28.8106	29.0747	29.0314	30.0184	28.8768	29.1246	28.8481	29.4986	27.8576
	P05976	P05976;P08590	Myosin light chain 1/3, skeletal muscle isoform;Myosin light chain 3	2	MYL1	sp|P05976|MYL1_HUMAN Myosin light chain 1/3, skeletal muscle isoform OS=Homo sapiens OX=9606 GN=MYL1 PE=2 SV=3;sp|P08590|MYL3_HUMAN Myosin light chain 3 OS=Homo sapiens OX=9606 GN=MYL3 PE=1 SV=3	29.4387	29.4877	29.8577	29.7384	29.4111	28.4365	29.3925	28.3363	29.5732	28.6649	28.5784	28.3351	27.9041	27.646	28.2847	28.5223	28.5177	28.5489	28.6834	28.5625	28.404	28.3249	28.0684	27.7702	28.592	24.6276	24.9593	29.3631	28.3668	28.9044	28.8881	29.216	29.4534	27.2571	27.5289	27.1001	29.8997	27.3202	29.8316	29.5819	29.4349	27.4381	29.156
	P07437	P07437	Tubulin beta chain	2	TUBB	sp|P07437|TBB5_HUMAN Tubulin beta chain OS=Homo sapiens OX=9606 GN=TUBB PE=1 SV=2	29.4234	29.3507	29.4176	28.2433	27.5851	28.2161	29.3501	28.8578	29.0889	26.985	27.5409	27.1255	28.2063	28.6142	28.9331	28.7258	29.0746	29.2123	29.0695	28.9069	29.2533	29.6595	29.5054	29.6722	27.3183	27.3006	26.9415	29.4212	29.1579	29.0365	27.3309	26.6428	26.9872	29.0069	29.3239	28.6952	30.4517	30.6673	30.11	28.3803	28.0875	28.1383	30.1184
	P04264	P04264	Keratin, type II cytoskeletal 1	1	KRT1	sp|P04264|K2C1_HUMAN Keratin, type II cytoskeletal 1 OS=Homo sapiens OX=9606 GN=KRT1 PE=1 SV=6	29.3733	29.6704	29.4816	28.7144	29.6251	30.4162	29.5799	29.2764	29.845	32.1156	29.4965	29.5342	30.1789	30.8354	29.9285	31.4407	28.8603	28.9495	29.2572	30.8481	29.6392	29.1816	29.1851	28.8415	29.4211	32.2457	29.6479	28.9898	29.3521	29.3193	30.1166	27.9387	28.5493	29.4297	29.9161	30.4362	28.9373	29.9151	29.8487	29.0769	29.117	29.2119	29.8163
	Q16643	Q16643	Drebrin	1	DBN1	sp|Q16643|DREB_HUMAN Drebrin OS=Homo sapiens OX=9606 GN=DBN1 PE=1 SV=4	29.3334	29.856	29.9058	30.3356	30.0641	30.0808	29.4913	28.3505	29.317	29.6496	30.0972	29.7656	28.1506	27.8047	28.4236	28.5354	28.4532	28.3326	29.1179	28.6801	28.2646	28.1027	28.2496	28.6062	30.3781	28.8406	28.5295	28.7649	27.9983	28.3444	30.2382	30.1171	30.3058	28.5472	28.1694	27.3158	29.8067	27.4891	29.4484	30.2207	30.3966	30.4295	28.7352
	P51991	P51991	Heterogeneous nuclear ribonucleoprotein A3	1	HNRNPA3	sp|P51991|ROA3_HUMAN Heterogeneous nuclear ribonucleoprotein A3 OS=Homo sapiens OX=9606 GN=HNRNPA3 PE=1 SV=2	29.3203	29.012	29.1364	29.1286	29.1542	29.1408	29.1435	30.03	29.2835	29.6126	29.4425	29.2181	30.2538	29.7316	29.6613	29.8561	29.915	29.9657	28.9686	29.2635	29.1104	29.4937	29.8409	29.1371	29.6219	29.164	29.5016	29.6877	30.0473	29.7942	29.5989	29.7935	29.4816	29.7176	29.9275	30.2194	28.7456	29.6962	29.1957	29.3535	29.2658	28.0325	29.8408
	Q9BQE3	Q9BQE3	Tubulin alpha-1C chain	1	TUBA1C	sp|Q9BQE3|TBA1C_HUMAN Tubulin alpha-1C chain OS=Homo sapiens OX=9606 GN=TUBA1C PE=1 SV=1	29.2999	29.045	29.2777	29.6706	29.7039	29.5906	29.7483	29.7412	29.6964	29.6115	29.369	28.451	29.1963	29.1732	29.1765	29.9765	29.644	29.732	29.1823	29.4112	29.3546	29.8718	29.5491	29.2827	28.8317	29.0704	28.2535	29.6806	29.9386	29.7815	29.0671	28.7855	29.0097	30.2877	30.3552	30.4264	30.066	30.4973	30.6043	29.2452	29.0703	28.1373	29.9488
	P84103	P84103	Serine/arginine-rich splicing factor 3	1	SRSF3	sp|P84103|SRSF3_HUMAN Serine/arginine-rich splicing factor 3 OS=Homo sapiens OX=9606 GN=SRSF3 PE=1 SV=1	29.2938	28.9443	28.9136	28.083	28.3425	27.7127	29.0728	29.1528	28.8613	27.5431	28.1669	28.7774	29.001	29.0675	29.4858	29.6001	29.2801	29.5293	29.0588	28.9952	28.9588	29.2557	29.208	29.1974	28.2504	28.2615	28.4096	30.0986	30.2789	29.7963	27.892	28.5628	28.0409	29.5517	30.1994	29.9573	28.2724	29.0347	28.6516	28.4586	28.0262	28.0723	29.2069
	P49916	P49916	DNA ligase 3	1	LIG3	sp|P49916|DNLI3_HUMAN DNA ligase 3 OS=Homo sapiens OX=9606 GN=LIG3 PE=1 SV=2	29.2832	29.1592	29.3073	28.6524	28.9814	28.7383	28.7483	29.7354	28.9417	29.5742	29.2116	28.742	29.8126	29.505	29.1274	29.3242	29.7197	29.8165	28.7279	29.1144	29.0087	28.9349	29.0023	28.5407	29.3273	28.7733	29.1674	28.8038	29.0703	28.945	29.3227	29.0764	28.6865	29.2515	29.1345	29.5488	28.7357	29.6882	28.9429	28.7469	28.5026	27.1025	29.0408
	P31943	P31943	Heterogeneous nuclear ribonucleoprotein H;Heterogeneous nuclear ribonucleoprotein H, N-terminally processed	1	HNRNPH1	sp|P31943|HNRH1_HUMAN Heterogeneous nuclear ribonucleoprotein H OS=Homo sapiens OX=9606 GN=HNRNPH1 PE=1 SV=4	29.2776	29.2085	29.1189	28.771	28.9082	28.3469	29.079	29.996	29.1261	28.8963	28.905	29.2302	29.6454	29.5259	29.5595	29.8207	29.843	29.7961	29.1422	29.2636	29.3718	29.3327	29.6092	28.9758	29.0213	28.6046	29.5	30.3267	30.736	30.4444	28.7974	29.2473	29.4061	29.328	29.6235	29.6381	28.9552	29.7676	29.0069	28.757	28.6017	28.0353	29.5459
	P0DP25	P0DP25;P0DP24;P0DP23		4	P0DP25	sp|P0DP25|CALM3_HUMAN Calmodulin-3 OS=Homo sapiens OX=9606 GN=CALM3 PE=1 SV=1;sp|P0DP24|CALM2_HUMAN Calmodulin-2 OS=Homo sapiens OX=9606 GN=CALM2 PE=1 SV=1;sp|P0DP23|CALM1_HUMAN Calmodulin-1 OS=Homo sapiens OX=9606 GN=CALM1 PE=1 SV=1	29.2419	29.5103	29.6095	29.4725	28.9539	29.0045	28.8156	27.761	28.8936	28.9465	28.697	28.9444	27.3367	27.2889	27.9249	27.7558	27.9696	27.6988	28.0786	28.0976	27.5681	27.7221	27.6742	28.1943	29.418	28.1091	26.7778	28.1869	27.0502	27.6632	29.0893	29.2912	29.1521	27.9834	27.2415	26.6947	29.6137	27.0874	28.8185	29.2289	29.2972	29.2197	27.9623
	Q9BZF9	Q9BZF9	Uveal autoantigen with coiled-coil domains and ankyrin repeats	1	UACA	sp|Q9BZF9|UACA_HUMAN Uveal autoantigen with coiled-coil domains and ankyrin repeats OS=Homo sapiens OX=9606 GN=UACA PE=1 SV=2	29.2382	29.4337	28.6664	30.0223	30.5295	30.3301	29.9628	28.4281	30.9904	30.8773	28.8938	28.9336	25.6025	26.5108	25.1017	27.6259	29.6453	29.514	25.6443	27.0017	25.8177	29.3145	26.9206	25.5942	28.7619	27.4442	23.1594	27.5524	25.0899	28.433	32.161	31.4014	31.7664	25.6597	31.4991	23.523	28.8729	31.2505	30.0165	29.391	29.8276	30.4079	30.125
	P19105	P19105;O14950	Myosin regulatory light chain 12A;Myosin regulatory light chain 12B	3	MYL12A	sp|P19105|ML12A_HUMAN Myosin regulatory light chain 12A OS=Homo sapiens OX=9606 GN=MYL12A PE=1 SV=2;sp|O14950|ML12B_HUMAN Myosin regulatory light chain 12B OS=Homo sapiens OX=9606 GN=MYL12B PE=1 SV=2	29.0891	29.7381	29.5133	29.2771	28.0275	28.861	29.6902	28.3315	29.2449	29.1475	28.6661	27.9611	27.5866	27.6943	28.3457	29.8103	28.3522	28.4932	28.729	28.5945	28.4478	28.3848	28.5604	29.0089	28.6459	27.7029	25.6552	28.4393	27.5571	28.267	28.4719	28.629	28.4958	27.6575	26.3498	25.3241	29.403	28.4098	29.6656	28.7449	28.3796	26.7349	29.0106
	Q9BUJ2	Q9BUJ2	Heterogeneous nuclear ribonucleoprotein U-like protein 1	1	HNRNPUL1	sp|Q9BUJ2|HNRL1_HUMAN Heterogeneous nuclear ribonucleoprotein U-like protein 1 OS=Homo sapiens OX=9606 GN=HNRNPUL1 PE=1 SV=2	29.0307	29.127	29.0729	28.4464	28.6095	28.4475	28.4439	29.2081	28.74	28.9385	28.6707	28.9101	28.2996	28.1463	28.0226	28.4303	28.7618	28.7748	28.3264	28.3658	28.3986	27.7282	28.0247	27.9912	28.8337	28.197	29.0222	28.7072	28.776	28.7941	29.0246	28.8778	28.8611	28.2252	28.5778	28.5462	28.4525	29.1261	28.3583	28.7444	28.3873	29.2625	27.1767
	Q99729	Q99729	Heterogeneous nuclear ribonucleoprotein A/B	1	HNRNPAB	sp|Q99729|ROAA_HUMAN Heterogeneous nuclear ribonucleoprotein A/B OS=Homo sapiens OX=9606 GN=HNRNPAB PE=1 SV=2	29.0093	29.1538	29.1555	29.0654	29.0455	29.0755	28.9959	29.6138	28.8537	29.2093	29.0212	28.9294	29.5341	29.4475	29.0934	29.3602	29.4992	29.5098	28.9675	29.1252	29.5399	29.2364	29.3018	29.088	28.9978	28.7818	29.0607	28.8486	28.9322	28.5299	28.9049	29.3233	28.9527	28.6841	28.9364	29.0299	28.7782	29.5909	28.9389	29.2487	28.8613	28.1601	29.0423
	Q9NZC9	Q9NZC9	SWI/SNF-related matrix-associated actin-dependent regulator of chromatin subfamily A-like protein 1	1	SMARCAL1	sp|Q9NZC9|SMAL1_HUMAN SWI/SNF-related matrix-associated actin-dependent regulator of chromatin subfamily A-like protein 1 OS=Homo sapiens OX=9606 GN=SMARCAL1 PE=1 SV=1	28.9922	29.0041	29.0254	28.5684	28.8412	28.6146	28.6864	29.1933	28.6183	29.1878	28.9783	29.0575	29.3527	29.1539	28.8308	29.223	29.5234	29.408	28.9911	28.9992	28.9235	28.5786	28.5949	28.8812	29.3544	28.4932	29.6376	28.4062	29.0411	28.6832	29.0454	28.6637	28.8429	28.866	29.3894	29.677	28.6961	29.7353	28.7255	28.864	28.5627	29.6254	28.9535
	P07910	P07910	Heterogeneous nuclear ribonucleoproteins C1/C2	2	HNRNPC	sp|P07910|HNRPC_HUMAN Heterogeneous nuclear ribonucleoproteins C1/C2 OS=Homo sapiens OX=9606 GN=HNRNPC PE=1 SV=4	28.9902	28.5574	28.549	28.2645	28.3816	28.3382	28.2712	29.089	28.2788	28.79	28.2415	28.7068	29.5487	29.1837	29.8911	29.1079	29.021	29.0704	28.4605	28.1119	28.6339	28.0307	28.9171	28.0541	28.114	27.958	28.6911	29.0435	28.9984	28.4945	27.7449	28.9217	28.0583	28.8329	29.0375	28.8734	28.2699	29.4188	28.1991	28.1472	27.579	29.5331	29.4971
	Q96Q89	Q96Q89	Kinesin-like protein KIF20B	1	KIF20B	sp|Q96Q89|KI20B_HUMAN Kinesin-like protein KIF20B OS=Homo sapiens OX=9606 GN=KIF20B PE=1 SV=3	28.9763	29.9173	28.987	29.6187	29.2109	29.1243	29.0793	29.8495	29.064	30.1836	29.7876	29.7291	29.8487	30.0579	29.2547	28.2975	29.8119	29.933	28.8898	29.4222	30.1655	29.69	29.6757	28.7466	29.9173	28.7093	29.735	29.402	29.8387	29.5602	29.5643	29.0461	28.9705	29.3544	29.4639	30.0742	28.6861	29.6537	28.5176	29.4488	28.7627	26.2631	29.2465
	P09493	P09493	Tropomyosin alpha-1 chain	1	TPM1	sp|P09493|TPM1_HUMAN Tropomyosin alpha-1 chain OS=Homo sapiens OX=9606 GN=TPM1 PE=1 SV=2	28.9493	29.1704	29.4499	29.51	29.1997	29.5183	29.4645	28.4985	28.9172	29.0126	29.2732	29.152	27.741	27.5997	28.192	28.5402	28.5015	28.346	28.8163	28.4133	28.2379	28.2176	28.1908	28.5805	29.2106	27.8135	27.6731	28.481	27.7761	28.3044	29.3743	29.3358	29.6966	27.9249	27.5847	27.0292	29.6918	27.5648	29.3127	29.5318	29.7114	30.041	28.1778
	Q9NYL9	Q9NYL9	Tropomodulin-3	1	TMOD3	sp|Q9NYL9|TMOD3_HUMAN Tropomodulin-3 OS=Homo sapiens OX=9606 GN=TMOD3 PE=1 SV=1	28.9488	28.8674	29.0967	28.9775	28.7818	28.9833	29.3713	28.1577	29.0894	28.5627	28.9618	28.2591	27.1472	27.1461	28.157	28.4185	27.7482	27.7701	28.3501	28.263	28.3399	28.0684	27.9899	27.7856	28.7896	27.2628	26.3584	28.4615	27.8497	28.521	28.4969	28.7556	28.9292	27.4201	27.0875	26.7277	29.1509	26.9763	29.2613	28.546	28.7916	27.3772	28.2425
	Q93075	Q93075	Putative deoxyribonuclease TATDN2	1	TATDN2	sp|Q93075|TATD2_HUMAN Putative deoxyribonuclease TATDN2 OS=Homo sapiens OX=9606 GN=TATDN2 PE=1 SV=2	28.9229	29.3631	29.847	24.6908	30.9916	29.1273	30.2188	29.9473	29.0307	25.4189	27.2421	31.7062	31.4489	30.9328	27.126	29.5979	30.9839	30.0648	29.417	29.8878	28.4796	29.9011	26.8445	29.8424	26.4642	30.4779	31.8701	28.1749	30.8078	29.5064	30.715	31.3734	26.2148	31.3763	31.2404	31.1171	30.5289	30.3348	29.158	26.5103	30.3455	31.5023	29.3515
	P52272	P52272	Heterogeneous nuclear ribonucleoprotein M	1	HNRNPM	sp|P52272|HNRPM_HUMAN Heterogeneous nuclear ribonucleoprotein M OS=Homo sapiens OX=9606 GN=HNRNPM PE=1 SV=3	28.8933	28.9489	28.8857	29.0465	28.9916	28.8458	28.6936	29.3517	28.8932	29.3283	29.3158	29.6434	29.1394	28.9542	29.0674	29.0318	29.1422	28.9726	29.1453	29.2451	29.0712	28.6407	28.8395	28.8644	29.1257	28.459	29.5264	29.2438	29.3059	28.9891	29.2829	29.1509	29.2277	29.1047	29.0676	29.1857	28.8379	29.3052	28.5075	29.0012	28.8356	29.7424	28.7908
	P35244	P35244	Replication protein A 14 kDa subunit	1	RPA3	sp|P35244|RFA3_HUMAN Replication protein A 14 kDa subunit OS=Homo sapiens OX=9606 GN=RPA3 PE=1 SV=1	28.8735	28.8014	28.8054	28.2687	28.0841	28.305	28.8269	29.6495	29.1958	29.1285	28.9394	28.0405	29.5587	29.0932	28.7601	29.8	29.6303	29.764	28.3483	29.2081	28.7743	28.6817	28.4556	28.4437	28.8163	28.3284	28.8211	28.7226	29.4411	29.2006	28.5672	28.3534	28.1615	28.8952	28.3973	28.7626	28.2208	29.2769	29.2127	28.4278	28.1907	26.9333	29.0491
	P55060	P55060	Exportin-2	1	CSE1L	sp|P55060|XPO2_HUMAN Exportin-2 OS=Homo sapiens OX=9606 GN=CSE1L PE=1 SV=3	28.8655	28.8616	28.877	28.2225	31.7182	27.7717	28.5993	28.6955	28.7614	27.5538	28.3167	28.8988	28.4621	29.9266	28.5303	27.8151	28.9391	28.8212	28.8488	28.7238	29.1175	29.1496	28.6467	29.515	28.1851	26.7305	31.5571	28.8595	29.0374	29.9344	28.0364	28.7426	28.7596	29.2148	27.7652	27.4625	29.8375	27.6269	28.1712	27.708	28.0432	28.4321	28.6948
	O75531	O75531	Barrier-to-autointegration factor;Barrier-to-autointegration factor, N-terminally processed	1	BANF1	sp|O75531|BAF_HUMAN Barrier-to-autointegration factor OS=Homo sapiens OX=9606 GN=BANF1 PE=1 SV=1	28.8545	28.221	28.7373	28.3126	27.8917	28.2382	27.5609	28.5715	28.0304	28.5643	28.0865	27.7487	28.7033	28.2166	28.1319	30.276	28.9216	29.2597	27.3688	28.0295	27.6105	27.8527	27.6004	26.9256	27.8196	27.5567	27.8453	27.3309	27.2024	27.2784	28.3992	28.3302	28.2153	27.8257	26.8673	27.5202	28.0612	28.6905	28.6998	28.317	27.4627	27.6218	27.9641
	Q9BVA1	Q9BVA1	Tubulin beta-2B chain	1	TUBB2B	sp|Q9BVA1|TBB2B_HUMAN Tubulin beta-2B chain OS=Homo sapiens OX=9606 GN=TUBB2B PE=1 SV=1	28.8357	28.8298	28.7218	28.8627	28.7	28.5986	29.1745	29.0929	29.108	28.7203	28.1189	28.7287	28.2928	28.5664	28.649	28.9483	28.9249	28.9509	28.7874	28.7422	29.4513	29.2359	29.2102	29.1204	28.1148	28.9259	28.2665	29.0518	29.1067	29.2311	27.873	27.9524	27.6693	28.6769	29.1106	29.2571	29.7215	29.9559	29.868	28.4151	28.1848	28.1226	29.5347
	P10412	P10412	Histone H1.4	2	HIST1H1E	sp|P10412|H14_HUMAN Histone H1.4 OS=Homo sapiens OX=9606 GN=HIST1H1E PE=1 SV=2	28.8222	28.2885	28.1687	26.9628	26.1961	26.9371	25.6345	26.2347	25.3398	26.4715	26.0173	27.9896	27.2183	28.5833	29.0515	27.0201	27.3346	26.3913	28.8996	27.1999	28.4516	27.4782	28.0658	29.491	27.8139	27.1828	28.9944	28.1049	26.9275	26.2707	27.0304	27.3792	27.206	26.8477	27.598	27.1376	27.7159	28.9088	25.6411	26.8546	26.5342	27.9846	27.8335
	P11142	P11142	Heat shock cognate 71 kDa protein	1	HSPA8	sp|P11142|HSP7C_HUMAN Heat shock cognate 71 kDa protein OS=Homo sapiens OX=9606 GN=HSPA8 PE=1 SV=1	28.8087	28.7898	28.7994	29.0841	29.1001	28.987	28.9739	28.8406	28.9616	28.8671	28.8261	28.6123	29.0855	29.1331	28.7272	28.9154	28.8317	28.9986	28.9385	28.9392	29.069	28.915	28.6226	28.6344	28.8114	29.5476	28.1701	28.7025	28.7791	29.0957	29.2285	28.7455	28.8974	29.4214	29.4171	29.656	29.1566	29.3171	29.404	29.0103	29.0488	27.7861	28.9503
	Q9Y2X7	Q9Y2X7	ARF GTPase-activating protein GIT1	1	GIT1	sp|Q9Y2X7|GIT1_HUMAN ARF GTPase-activating protein GIT1 OS=Homo sapiens OX=9606 GN=GIT1 PE=1 SV=2	28.7709	28.673	28.8442	30.184	30.2657	30.8269	28.5604	29.1508	28.382	29.1899	29.3881	31.5057	29.6079	28.2197	28.4399	29.3087	29.2703	29.0209	28.5011	28.2422	28.3519	28.7482	28.9542	28.3943	29.6621	29.1215	29.4348	29.6709	30.1403	29.6379	30.0875	29.7131	29.6471	29.5322	30.6582	29.697	28.8472	28.8635	28.0297	29.2119	30.9827	30.0539	27.8973
	Q96PK6	Q96PK6	RNA-binding protein 14	1	RBM14	sp|Q96PK6|RBM14_HUMAN RNA-binding protein 14 OS=Homo sapiens OX=9606 GN=RBM14 PE=1 SV=2	28.7704	29.102	28.9436	28.8974	28.9827	28.9337	28.6456	29.4074	28.7377	29.642	29.2799	29.4718	29.9454	29.5017	28.9736	29.3145	29.6544	29.4975	29.068	29.2325	29.2152	28.9975	29.1934	29.1701	29.558	29.0201	29.8507	29.2804	29.7608	29.3503	29.7585	29.2281	29.2951	29.8015	29.7394	30.2994	28.6853	29.5593	28.6005	29.0886	28.872	28.427	28.9572
	P62304	P62304	Small nuclear ribonucleoprotein E	1	SNRPE	sp|P62304|RUXE_HUMAN Small nuclear ribonucleoprotein E OS=Homo sapiens OX=9606 GN=SNRPE PE=1 SV=1	28.7294	28.6041	28.267	27.6125	28.501	28.2506	28.3847	28.0615	28.7846	28.5832	27.1576	29.8277	28.0929	28.3306	28.8598	27.7916	28.2983	28.3763	29.3719	29.698	30.3861	27.9994	28.2203	26.8382	28.2683	28.2158	27.7599	28.8281	28.6513	29.0405	26.7857	28.2566	27.5594	28.4338	28.2916	28.1805	27.9517	28.7202	28.1695	28.4523	27.9247	28.2317	28.4848
	Q01844	Q01844	RNA-binding protein EWS	1	EWSR1	sp|Q01844|EWS_HUMAN RNA-binding protein EWS OS=Homo sapiens OX=9606 GN=EWSR1 PE=1 SV=1	28.7271	28.817	28.5205	27.9277	28.1894	28.0434	28.1712	29.3552	28.3603	28.0823	28.3259	28.4928	28.895	28.7126	28.1521	28.4173	29.0886	29.1872	28.5345	28.4944	28.6773	28.3228	28.54	28.3962	28.5187	28.2509	28.9651	29.0322	29.6315	29.1715	28.4867	28.4043	28.3575	28.3552	28.429	28.7285	28.3109	29.2907	28.4489	27.2555	28.1702	27.8913	28.6661
	P68366	P68366	Tubulin alpha-4A chain	1	TUBA4A	sp|P68366|TBA4A_HUMAN Tubulin alpha-4A chain OS=Homo sapiens OX=9606 GN=TUBA4A PE=1 SV=1	28.6912	28.2436	27.9922	28.7512	28.7245	29.3755	28.6289	27.7964	28.7494	28.4015	28.5354	27.8725	26.9961	27.7089	28.1628	28.6989	27.4002	27.9894	28.0791	28.0981	28.6896	28.8602	28.8421	28.3295	25.9167	27.5247	26.6988	28.7945	28.7329	28.7024	28.0535	27.817	27.135	29.2699	29.5189	29.3225	29.061	29.5338	29.6747	27.5091	28.0911	26.3827	29.0699
	Q9Y3I0	Q9Y3I0	tRNA-splicing ligase RtcB homolog	1	RTCB	sp|Q9Y3I0|RTCB_HUMAN tRNA-splicing ligase RtcB homolog OS=Homo sapiens OX=9606 GN=RTCB PE=1 SV=1	28.6635	28.8773	28.7212	27.2485	27.3328	27.3244	27.4569	28.4267	27.6847	28.0234	27.7533	27.6539	27.9447	27.4529	27.1035	28.508	28.9832	29.0485	27.2843	27.4571	27.3454	27.3444	27.4785	27.2468	27.8057	27.2521	27.862	28.4568	28.7305	28.5549	27.9072	27.6941	27.6203	28.1752	28.5272	28.8176	27.3363	28.0826	27.4743	27.8872	27.7014	28.0362	28.4893
	Q7Z406	Q7Z406	Myosin-14	1	MYH14	sp|Q7Z406|MYH14_HUMAN Myosin-14 OS=Homo sapiens OX=9606 GN=MYH14 PE=1 SV=2	28.624	28.844	28.9628	29.3782	28.8202	29.1667	29.0993	28.0889	29.0161	28.6992	28.8681	28.6935	27.3088	26.9766	27.858	28.0364	27.7909	27.7699	28.4368	28.2363	28.031	27.8864	27.889	28.0725	28.9158	27.568	26.9729	28.1296	27.4991	28.2594	28.8351	28.8309	29.1242	27.3447	27.3142	26.7854	29.2512	27.0805	29.0609	29.2737	29.353	29.1463	28.1385
	P61247	P61247	40S ribosomal protein S3a	1	RPS3A	sp|P61247|RS3A_HUMAN 40S ribosomal protein S3a OS=Homo sapiens OX=9606 GN=RPS3A PE=1 SV=2	28.6225	28.468	28.5186	28.4412	28.7516	28.6015	28.5531	29.2443	28.7931	29.3131	29.2686	28.9138	29.0384	28.7926	28.5678	28.2817	28.8557	28.5829	29.4921	29.6924	29.7306	29.9205	29.9699	29.7545	29.3873	28.9386	29.5023	28.9063	29.3236	29.0485	29.1129	29.0208	29.2132	28.7443	28.5626	28.9029	28.4053	28.8325	28.484	28.7183	28.7633	27.7281	28.3581
	O14979	O14979	Heterogeneous nuclear ribonucleoprotein D-like	1	HNRNPDL	sp|O14979|HNRDL_HUMAN Heterogeneous nuclear ribonucleoprotein D-like OS=Homo sapiens OX=9606 GN=HNRNPDL PE=1 SV=3	28.6087	28.2708	28.4656	28.4279	28.5006	28.3835	28.6984	29.4654	28.8604	28.9097	28.7285	28.2544	29.0241	28.866	28.9039	28.7648	28.9525	29.0625	28.3991	28.9263	28.7437	29.0109	29.0113	28.6201	28.4942	28.0044	28.5813	28.4751	28.8646	28.6956	28.6155	28.6927	28.4026	28.7667	28.6574	28.8264	28.1695	29.0014	28.591	28.6095	28.3585	27.2991	29.0239
	P30050	P30050	60S ribosomal protein L12	1	RPL12	sp|P30050|RL12_HUMAN 60S ribosomal protein L12 OS=Homo sapiens OX=9606 GN=RPL12 PE=1 SV=1	28.5875	28.1763	28.4589	27.9001	28.0838	28.0003	28.6743	28.8806	28.8513	28.6883	28.6501	28.5048	28.7849	28.6878	28.3846	28.0461	27.8175	27.9058	29.0332	29.3537	29.5654	29.3051	29.4704	29.4192	28.3936	28.8613	29.2267	28.2359	28.4099	28.4948	27.8027	27.8146	27.959	27.8836	27.8215	28.0259	28.1006	28.5423	28.5216	27.7919	28.1388	27.4427	27.7414
	P41240	P41240	Tyrosine-protein kinase CSK	2	CSK	sp|P41240|CSK_HUMAN Tyrosine-protein kinase CSK OS=Homo sapiens OX=9606 GN=CSK PE=1 SV=1	28.5795	28.4586	29.3884	31.5703	28.975	28.9508	28.5971	28.4365	28.6064	28.0243	28.2822	29.2054	28.2677	28.2272	28.1458	28.2724	28.3566	28.4402	29.4757	29.0284	30.1778	29.2686	29.3648	29.2758	28.7812	29.1816	28.006	28.5822	27.5753	29.7971	28.7394	28.2102	28.9556	29.0882	28.8322	27.9193	30.1581	28.4918	28.554	29.0899	30.2319	28.7356	28.065
	P84090	P84090	Enhancer of rudimentary homolog	1	ERH	sp|P84090|ERH_HUMAN Enhancer of rudimentary homolog OS=Homo sapiens OX=9606 GN=ERH PE=1 SV=1	28.5336	28.861	28.8157	29.381	28.7725	29.2739	27.4288	28.4987	27.5939	28.0976	29.1897	29.457	28.7442	29.1633	29.4866	27.1115	29.7738	29.2569	28.6889	27.9184	28.6778	27.9295	28.5733	29.2805	29.1703	28.9731	30.3193	29.4522	29.295	28.8925	29.3332	29.7534	29.5509	31.7164	32.4483	32.858	28.5947	29.4494	27.619	29.792	29.8123	31.1423	29.4532
	P19338	P19338	Nucleolin	2	NCL	sp|P19338|NUCL_HUMAN Nucleolin OS=Homo sapiens OX=9606 GN=NCL PE=1 SV=3	28.5238	28.5766	28.4687	28.4017	28.4768	28.3035	28.1668	28.6337	28.1453	28.6568	28.6915	28.7771	28.7078	28.6255	28.4325	27.8857	27.9147	27.9973	28.9967	28.947	29.1688	29.1981	29.3575	29.4711	28.8672	28.4245	29.3465	28.0076	28.1005	27.7804	28.8865	28.7945	28.8218	28.1663	28.0712	27.9823	28.3444	28.5467	28.3591	28.1624	28.5102	28.0608	27.7326
	O00571	O00571	ATP-dependent RNA helicase DDX3X	1	DDX3X	sp|O00571|DDX3X_HUMAN ATP-dependent RNA helicase DDX3X OS=Homo sapiens OX=9606 GN=DDX3X PE=1 SV=3	28.5166	28.4564	28.4281	28.9993	28.8745	28.9047	28.9448	29.5524	28.8261	29.5904	29.3693	28.9549	29.2281	28.6599	28.2414	30.7198	30.9969	30.9562	28.6428	29.0274	28.7678	28.7015	28.8395	28.5145	29.2009	29.1726	29.0984	34.6825	34.9318	34.4815	29.3921	29.1255	28.9783	30.1223	30.3303	30.7452	28.4011	29.0763	28.6694	29.0927	28.955	27.8434	28.9966
	P62318	P62318	Small nuclear ribonucleoprotein Sm D3	1	SNRPD3	sp|P62318|SMD3_HUMAN Small nuclear ribonucleoprotein Sm D3 OS=Homo sapiens OX=9606 GN=SNRPD3 PE=1 SV=1	28.4965	28.0514	27.9333	27.7186	28.1224	28.0863	27.9792	28.5496	28.3505	27.5138	28.141	27.8973	27.995	28.0859	28.2911	27.9771	28.2858	28.2504	29.1857	29.5683	29.8843	28.1109	28.0641	27.4697	27.274	27.8813	28.1272	28.2799	28.4828	28.6545	27.3765	27.9698	27.8931	28.2529	28.4004	28.9693	27.8532	28.4701	28.1259	27.539	27.5818	26.1943	28.2448
	O95239	O95239	Chromosome-associated kinesin KIF4A	1	KIF4A	sp|O95239|KIF4A_HUMAN Chromosome-associated kinesin KIF4A OS=Homo sapiens OX=9606 GN=KIF4A PE=1 SV=3	28.4924	28.4133	28.3982	28.6646	28.3295	28.6406	28.556	29.3584	28.4139	27.3573	28.2969	28.8559	28.7416	28.5326	28.9054	29.0338	28.6312	28.194	28.4137	28.3558	28.5064	28.332	28.4921	28.4152	28.5978	28.0582	26.9157	30.0482	29.0447	28.9125	28.9094	26.9542	28.2565	27.6994	28.241	28.5969	27.8234	28.7886	28.2275	28.0757	28.4967	28.1444	28.6273
	Q08211	Q08211	ATP-dependent RNA helicase A	1	DHX9	sp|Q08211|DHX9_HUMAN ATP-dependent RNA helicase A OS=Homo sapiens OX=9606 GN=DHX9 PE=1 SV=4	28.4882	28.0015	28.1019	27.6943	28.2353	27.9336	28.3863	29.2023	28.6725	28.5204	28.7521	28.2391	29.1337	28.6825	28.8887	29.0115	28.5561	28.8807	28.2071	28.6657	28.5243	28.5633	28.7844	28.0952	28.2807	27.881	28.3644	29.1577	29.7003	29.6807	28.449	28.4186	28.3468	28.6801	28.3831	28.5654	27.6767	28.6063	28.4608	28.2505	28.0005	27.8157	28.7082
	P62750	P62750	60S ribosomal protein L23a	1	RPL23A	sp|P62750|RL23A_HUMAN 60S ribosomal protein L23a OS=Homo sapiens OX=9606 GN=RPL23A PE=1 SV=1	28.4815	28.2965	28.0639	26.9647	27.6035	27.4544	27.5884	27.7607	27.4167	24.5884	25.7369	27.6119	26.9364	28.2502	27.4111	27.6315	27.4755	27.6012	28.8231	28.2179	27.7221	28.8339	28.7467	28.1385	27.7505	28.4554	28.2377	28.5021	27.2721	28.0498	27.1804	28.316	27.7862	26.9139	27.5219	27.2897	27.0464	28.0331	27.2217	25.1358	26.6298	26.3733	26.0732
	P60866	P60866	40S ribosomal protein S20	1	RPS20	sp|P60866|RS20_HUMAN 40S ribosomal protein S20 OS=Homo sapiens OX=9606 GN=RPS20 PE=1 SV=1	28.4773	28.4899	28.6049	28.591	28.807	28.9156	28.2508	28.8763	28.0898	28.7818	28.885	29.401	29.0732	28.7855	28.3748	28.8067	28.7898	28.744	29.2246	29.2623	29.3255	29.2006	29.3091	29.7305	29.4065	29.3592	29.3314	28.6768	28.9931	28.5135	29.5177	29.2284	29.029	29.2409	29.2662	29.5251	28.6282	28.9872	28.2153	28.9864	28.9482	28.7913	28.5668
	P14866	P14866	Heterogeneous nuclear ribonucleoprotein L	1	HNRNPL	sp|P14866|HNRPL_HUMAN Heterogeneous nuclear ribonucleoprotein L OS=Homo sapiens OX=9606 GN=HNRNPL PE=1 SV=2	28.4376	28.3062	28.2649	28.3541	28.3516	28.1047	28.3678	29.1965	28.6153	28.4705	28.6084	28.5025	28.997	28.7545	29.0884	28.8013	28.829	29.0473	28.0617	27.7997	27.9873	28.3586	28.7959	28.1885	28.5228	28.0516	28.8015	29.0265	28.9007	28.84	28.2748	28.8003	28.3511	28.8252	28.9018	28.9752	28.0295	28.8574	28.0068	28.4006	28.1964	27.4669	29.0164
	Q96QR8	Q96QR8	Transcriptional activator protein Pur-beta	2	PURB	sp|Q96QR8|PURB_HUMAN Transcriptional activator protein Pur-beta OS=Homo sapiens OX=9606 GN=PURB PE=1 SV=3	28.4347	28.5461	28.5643	28.3777	28.3086	28.4912	27.7378	28.18	27.8685	28.2727	28.7191	28.8026	28.744	28.8349	28.5856	27.6029	28.6111	28.3498	28.1649	27.9519	28.219	27.642	28.072	27.9267	28.7651	29.0149	29.5058	27.9017	27.8713	27.9805	28.3854	28.4455	28.5468	27.7722	28.8565	28.495	28.2371	29.007	27.2518	28.6861	28.4319	28.4213	28.1499
	P17844	P17844	Probable ATP-dependent RNA helicase DDX5	1	DDX5	sp|P17844|DDX5_HUMAN Probable ATP-dependent RNA helicase DDX5 OS=Homo sapiens OX=9606 GN=DDX5 PE=1 SV=1	28.4281	28.2978	28.3836	28.695	28.773	28.5648	30.1703	30.9126	30.1054	29.185	29.028	28.7901	29.2282	28.7957	28.8998	29.2236	29.3398	29.3828	29.0284	29.1555	29.2595	29.1699	29.3345	28.8789	28.7923	28.3652	29.2916	30.3133	30.7779	30.5239	29.2392	29.0885	28.9502	29.5698	29.7144	30.1413	28.3679	29.0722	28.6481	29.0753	28.7333	28.1004	29.0561
	P62753	P62753	40S ribosomal protein S6	1	RPS6	sp|P62753|RS6_HUMAN 40S ribosomal protein S6 OS=Homo sapiens OX=9606 GN=RPS6 PE=1 SV=1	28.4247	28.505	28.3246	27.6858	27.8348	27.7134	28.2589	27.9759	28.0106	27.9826	28.1385	28.2766	27.7696	27.9424	28.1504	28.1028	27.6621	27.5662	29.4484	29.1877	29.6233	29.2955	29.5645	29.7046	28.4555	28.0699	28.7502	28.3117	28.1285	28.1964	28.0665	28.0647	28.2194	27.5295	28.0632	28.0289	28.3522	28.1658	27.8138	27.902	27.9056	27.2411	27.3551
	Q06830	Q06830	Peroxiredoxin-1	1	PRDX1	sp|Q06830|PRDX1_HUMAN Peroxiredoxin-1 OS=Homo sapiens OX=9606 GN=PRDX1 PE=1 SV=1	28.4181	28.3174	28.6424	28.6671	28.4177	28.4152	28.5627	28.2196	28.5834	27.9691	28.4039	28.1075	28.2903	28.661	28.1499	28.2772	28.6658	28.7361	28.4149	28.252	28.5805	28.8104	28.3932	28.2935	28.5471	28.5207	28.0548	28.9906	29.0083	29.0519	28.4708	28.1428	28.5808	28.2421	28.5565	28.4742	28.7286	28.1359	28.7356	28.5655	28.3899	27.7966	28.5362
	P15880	P15880	40S ribosomal protein S2	1	RPS2	sp|P15880|RS2_HUMAN 40S ribosomal protein S2 OS=Homo sapiens OX=9606 GN=RPS2 PE=1 SV=2	28.4172	28.2177	28.2048	27.8435	28.3116	27.9636	28.7362	28.7791	28.6836	28.8659	28.8078	28.8899	28.8144	28.2455	28.0561	29.4978	28.4297	28.4952	28.9444	29.2405	29.0265	29.4267	29.5255	29.3594	28.5633	28.5721	28.7295	28.679	29.0608	28.8048	28.6333	28.5963	28.436	28.5538	28.3238	28.5965	28.1205	28.6211	28.5128	28.0491	28.4669	28.1424	28.3348
	Q07020	Q07020	60S ribosomal protein L18	1	RPL18	sp|Q07020|RL18_HUMAN 60S ribosomal protein L18 OS=Homo sapiens OX=9606 GN=RPL18 PE=1 SV=2	28.4157	28.3356	28.1535	28.057	28.1303	27.8413	27.4891	27.7822	27.4321	27.5225	28.1105	28.9657	27.0671	28.3198	27.7992	27.2756	27.1523	27.0346	29.2914	28.6912	28.4034	29.0025	29.1627	29.477	29.1701	28.4544	29.2432	27.5048	26.5416	27.333	28.1016	28.5543	28.4479	27.0436	27.8102	27.4224	27.222	27.2418	27.5938	27.2337	27.2509	27.6968	26.0567
	Q07955	Q07955	Serine/arginine-rich splicing factor 1	1	SRSF1	sp|Q07955|SRSF1_HUMAN Serine/arginine-rich splicing factor 1 OS=Homo sapiens OX=9606 GN=SRSF1 PE=1 SV=2	28.3999	28.2079	28.3459	27.7573	27.9893	27.8798	28.4857	28.7891	28.2741	28.0751	27.9468	27.9008	29.2321	29.0771	29.1292	29.2354	29.4071	29.448	28.5166	28.5111	28.7189	28.6415	28.9194	28.576	27.9463	27.5547	28.3415	29.4776	29.7929	29.3577	28.1277	28.3479	27.9426	30.0655	30.2138	30.3556	28.184	28.8588	28.1819	28.0182	28.1891	27.1228	29.3231
	P62263	P62263	40S ribosomal protein S14	1	RPS14	sp|P62263|RS14_HUMAN 40S ribosomal protein S14 OS=Homo sapiens OX=9606 GN=RPS14 PE=1 SV=3	28.3999	28.461	28.6005	28.6114	28.7302	28.5432	28.2618	28.7838	28.2501	28.8463	28.7968	28.8903	28.7838	28.6079	28.5263	28.5609	28.7292	28.7891	29.3116	29.3258	29.3639	29.6632	29.7904	29.6625	28.9474	28.3251	29.3768	28.7208	28.9946	28.672	28.7256	28.6853	28.9122	29.0772	29.1439	29.5333	28.27	28.9265	28.2708	28.3377	28.7438	28.8583	29.2077
	Q9H444	Q9H444	Charged multivesicular body protein 4b	2	CHMP4B	sp|Q9H444|CHM4B_HUMAN Charged multivesicular body protein 4b OS=Homo sapiens OX=9606 GN=CHMP4B PE=1 SV=1	28.3874	28.6658	28.6796	28.5513	28.3017	28.4192	26.4874	26.9306	26.563	28.3733	28.0552	28.6257	27.6388	27.2286	27.0622	26.875	26.6253	26.5963	26.1255	26.3441	26.1557	26.4164	26.6143	27.1999	28.4105	28.1776	29.5928	26.0106	26.0543	25.9865	28.4326	28.3249	29.0393	27.2928	27.5992	28.303	27.705	28.3731	26.9748	28.718	28.2793	27.9375	26.4906
	Q9UM54	Q9UM54	Unconventional myosin-VI	1	MYO6	sp|Q9UM54|MYO6_HUMAN Unconventional myosin-VI OS=Homo sapiens OX=9606 GN=MYO6 PE=1 SV=4	28.3628	28.3649	28.5653	29.0617	28.5222	28.9726	28.7852	27.7961	28.9068	28.4267	28.7863	28.2339	27.2249	26.8517	27.5849	28.0155	27.5119	27.5216	27.9681	27.9786	27.8999	27.6074	27.5388	27.4821	28.5421	27.2083	26.265	27.85	27.4717	28.1471	28.5021	28.5619	28.7587	27.3991	27.2117	26.8132	28.8301	26.7429	28.9705	28.7763	28.9682	27.9429	28.0052
	P62249	P62249	40S ribosomal protein S16	1	RPS16	sp|P62249|RS16_HUMAN 40S ribosomal protein S16 OS=Homo sapiens OX=9606 GN=RPS16 PE=1 SV=2	28.3585	28.5031	28.4444	28.7478	28.802	28.841	29.0494	29.4722	29.4222	29.2496	29.2283	28.9943	28.6183	28.4244	28.5877	29.3735	28.7695	28.6412	29.2116	29.5511	29.5678	29.4448	29.5402	29.5826	29.0146	29.3704	29.3535	28.7346	29.6297	29.1716	29.2606	29.1986	29.0704	28.8875	29.3497	29.5491	28.7736	28.9631	28.8712	28.6066	29.0062	28.809	28.7484
	Q12905	Q12905	Interleukin enhancer-binding factor 2	1	ILF2	sp|Q12905|ILF2_HUMAN Interleukin enhancer-binding factor 2 OS=Homo sapiens OX=9606 GN=ILF2 PE=1 SV=2	28.3094	27.7927	27.7474	26.8415	27.8512	27.52	27.888	28.7903	28.1519	27.568	27.4361	27.6022	28.5443	28.3614	28.5945	28.5458	28.4863	28.5323	28.3023	28.2777	28.3328	28.1626	28.4536	28.2282	27.59	27.2636	28.0179	28.0571	28.2732	28.0417	27.9436	27.9497	27.9739	27.6338	28.0056	28.3357	27.8261	28.627	28.1625	27.7648	27.2927	27.1429	28.3119
	Q13151	Q13151	Heterogeneous nuclear ribonucleoprotein A0	1	HNRNPA0	sp|Q13151|ROA0_HUMAN Heterogeneous nuclear ribonucleoprotein A0 OS=Homo sapiens OX=9606 GN=HNRNPA0 PE=1 SV=1	28.2878	28.3286	28.36	28.2575	27.9548	28.1135	28.3281	29.2722	28.7515	28.5493	28.483	29.0025	29.209	28.9057	28.6457	29.1076	28.8974	28.9917	28.5274	28.8221	28.7915	28.7033	28.8728	28.6786	28.5132	28.1416	29.3759	28.5839	28.9107	28.6716	28.1989	28.4423	28.8888	28.5342	28.4466	28.6122	28.0025	28.9492	28.4723	28.7099	28.5789	29.1293	28.8525
	P62280	P62280	40S ribosomal protein S11	1	RPS11	sp|P62280|RS11_HUMAN 40S ribosomal protein S11 OS=Homo sapiens OX=9606 GN=RPS11 PE=1 SV=3	28.2703	28.6843	28.434	28.8703	28.9092	28.8274	28.1247	28.3548	28.0779	28.7171	29.118	29.3723	28.3715	28.1592	27.9721	28.418	28.2501	28.1402	28.8875	28.6072	28.8257	28.9213	29.1008	29.2571	29.2813	28.9407	29.4532	28.5829	28.6168	28.281	28.9677	29.2028	29.1466	29.1166	29.3595	29.7614	28.8309	29.1173	28.3408	29.1045	29.038	28.5468	28.2959
	Q9UKN7	Q9UKN7	Unconventional myosin-XV	1	MYO15A	sp|Q9UKN7|MYO15_HUMAN Unconventional myosin-XV OS=Homo sapiens OX=9606 GN=MYO15A PE=1 SV=2	28.2599	28.1057	28.0184	28.5846	28.6393	27.696	27.14	27.9103	24.7308	27.4459	27.9485	28.4897	27.9324	28.95	28.8681	27.7876	29.3056	28.3533	28.7484	27.945	28.8637	28.1661	28.518	28.8004	28.7595	28.1246	28.9693	27.8787	27.8489	26.7264	28.2091	28.1827	28.3367	27.6339	23.689	28.5588	28.225	30.0108	23.9369	28.8077	27.7635	26.2035	27.3505
	P26373	P26373	60S ribosomal protein L13	1	RPL13	sp|P26373|RL13_HUMAN 60S ribosomal protein L13 OS=Homo sapiens OX=9606 GN=RPL13 PE=1 SV=4	28.2581	28.4883	28.3978	28.5903	28.7517	28.5454	28.1199	28.244	28.0789	28.9149	28.9019	29.5997	28.4063	28.6484	28.2976	27.2738	27.6753	27.4441	29.3643	29.0778	29.4656	29.3318	29.5259	29.9772	29.3904	29.142	29.7391	28.0924	27.9529	27.8315	29.1298	28.7695	29.0019	28.5427	28.6473	28.9044	28.1935	28.7675	27.9939	28.7526	28.6897	28.9819	27.4963
	Q14978	Q14978	Nucleolar and coiled-body phosphoprotein 1	1	NOLC1	sp|Q14978|NOLC1_HUMAN Nucleolar and coiled-body phosphoprotein 1 OS=Homo sapiens OX=9606 GN=NOLC1 PE=1 SV=2	28.2547	28.5119	28.6038	28.539	28.5366	28.4534	28.0513	27.4388	27.7586	28.5785	28.4942	28.7618	28.9255	28.6207	28.6231	27.8748	28.2221	28.1952	28.0615	27.7114	27.5527	28.2885	28.302	28.5427	29.4059	28.2857	29.5982	28.0576	27.9338	27.9711	29.1694	29.0889	29.0886	28.8517	28.5259	28.5869	28.4354	28.4137	28.0411	28.3282	29.0526	29.2578	28.3285
	Q96TA1	Q96TA1	Niban-like protein 1	1	FAM129B	sp|Q96TA1|NIBL1_HUMAN Niban-like protein 1 OS=Homo sapiens OX=9606 GN=FAM129B PE=1 SV=3	28.2341	27.9386	27.9939	27.6084	27.8142	27.6564	27.7152	27.9379	27.8445	27.8236	27.8998	27.8083	28.2318	27.9924	28.1443	27.999	28.2496	28.2423	27.9165	27.9516	27.9622	27.9868	28.0653	28.2574	27.3863	27.6833	28.1511	27.9191	28.0798	27.9687	28.0113	27.8671	28.664	27.9595	28.0223	28.3021	27.7207	27.7747	27.7767	27.808	27.8227	27.5279	27.912
	P15927	P15927	Replication protein A 32 kDa subunit	1	RPA2	sp|P15927|RFA2_HUMAN Replication protein A 32 kDa subunit OS=Homo sapiens OX=9606 GN=RPA2 PE=1 SV=1	28.2079	28.0782	28.1272	27.8475	28.012	27.7664	28.0829	28.3847	28.0615	28.5144	28.1951	27.6287	28.6009	28.3018	28.1355	28.688	28.5093	28.6895	27.4645	27.913	27.8569	27.6427	27.654	27.3376	27.9759	27.561	28.1479	27.9548	28.1421	28.4141	27.8611	27.4514	27.4898	27.9121	27.771	28.4473	27.7877	28.5123	27.9955	27.9228	27.5393	26.5656	28.2687
	P68133	P68133	Actin, alpha skeletal muscle	1	ACTA1	sp|P68133|ACTS_HUMAN Actin, alpha skeletal muscle OS=Homo sapiens OX=9606 GN=ACTA1 PE=1 SV=1	28.2003	28.5479	28.5983	28.1635	27.6487	28.0601	28.4503	27.2966	28.1134	26.7823	27.5835	27.2659	26.5793	26.5046	27.3591	27.2082	27.0475	26.9828	27.7357	27.7951	27.552	27.4788	27.3419	27.5926	27.7614	26.9043	25.1045	28.0891	26.8854	27.5862	26.6935	27.5649	27.7956	25.8866	26.2988	25.1942	28.6781	26.5773	27.9114	28.0717	27.9307	25.9978	27.2085
	Q12906	Q12906	Interleukin enhancer-binding factor 3	1	ILF3	sp|Q12906|ILF3_HUMAN Interleukin enhancer-binding factor 3 OS=Homo sapiens OX=9606 GN=ILF3 PE=1 SV=3	28.1981	27.772	27.8601	27.8121	28.1126	27.7537	27.6994	28.4655	27.9333	28.3291	28.353	28.026	28.4166	28.1147	28.377	28.3997	28.4295	28.4393	27.8748	28.1372	27.9133	27.9702	28.2711	27.6751	28.6272	27.9503	28.3738	28.1788	28.3198	28.0062	28.6561	28.7124	28.4317	28.4589	28.1949	28.2394	27.4717	28.4356	27.6594	27.9302	28.1002	27.5166	28.1957
	P98179	P98179	RNA-binding protein 3	1	RBM3	sp|P98179|RBM3_HUMAN RNA-binding protein 3 OS=Homo sapiens OX=9606 GN=RBM3 PE=1 SV=1	28.1868	28.444	28.1351	28.208	28.4062	28.1258	27.706	28.4047	27.7534	28.1427	27.7708	28.6209	28.2791	28.1395	27.9969	26.9696	28.5729	28.5096	28.3439	28.1447	28.7971	28.126	28.4924	28.7923	28.4465	28.2502	29.5658	28.3269	28.3672	27.8409	27.7193	28.1914	28.0126	28.2311	29.0501	28.7353	27.9967	28.9647	27.5121	28.2622	28.276	29.2916	28.5005
	Q96T60	Q96T60	Bifunctional polynucleotide phosphatase/kinase;Polynucleotide 3-phosphatase;Polynucleotide 5-hydroxyl-kinase	1	PNKP	sp|Q96T60|PNKP_HUMAN Bifunctional polynucleotide phosphatase/kinase OS=Homo sapiens OX=9606 GN=PNKP PE=1 SV=1	28.1765	28.2104	28.229	27.3172	27.8738	27.5133	27.5673	28.3662	27.7943	28.2925	28.0304	28.1307	28.7355	28.386	28.0801	28.3468	28.476	28.6687	27.8192	28.031	28.0192	27.7895	27.8979	27.7861	28.1144	27.4873	28.5681	27.5777	28.0566	27.856	27.7083	27.627	27.6005	27.7514	27.9935	28.4129	27.6561	28.8001	27.9601	27.9263	27.5056	28.279	27.757
	P36578	P36578	60S ribosomal protein L4	1	RPL4	sp|P36578|RL4_HUMAN 60S ribosomal protein L4 OS=Homo sapiens OX=9606 GN=RPL4 PE=1 SV=5	28.1708	27.7667	27.6439	26.8029	27.321	27.1669	27.5535	27.756	27.2668	26.3197	26.7964	27.8498	27.2353	27.6393	27.1576	27.2075	26.8135	26.8025	28.7083	28.4344	28.137	28.9247	28.9593	27.9139	27.9724	28.1522	27.9648	27.3101	26.8923	27.3871	27.0838	27.567	27.513	26.572	27.3416	27.0139	26.7546	27.1275	27.2387	26.0186	26.8742	26.353	25.9297
	Q7Z2E3	Q7Z2E3	Aprataxin	1	APTX	sp|Q7Z2E3|APTX_HUMAN Aprataxin OS=Homo sapiens OX=9606 GN=APTX PE=1 SV=2	28.1554	28.4144	28.364	27.6353	27.349	27.449	27.3492	28.2249	27.445	27.4371	27.396	27.9614	28.2438	28.1817	27.8991	27.7987	28.4221	28.4404	27.8647	27.6732	28.1699	27.5676	27.5945	27.7175	28.0531	27.4139	28.5114	27.6055	27.6955	27.5362	27.535	27.2723	27.6452	26.946	27.4662	27.8005	27.8829	28.5548	27.4863	27.2403	26.8767	26.8	27.5664
	Q9UHB6	Q9UHB6	LIM domain and actin-binding protein 1	1	LIMA1	sp|Q9UHB6|LIMA1_HUMAN LIM domain and actin-binding protein 1 OS=Homo sapiens OX=9606 GN=LIMA1 PE=1 SV=1	28.1425	28.3851	28.485	28.9189	28.7114	29.0157	28.443	27.216	28.2654	28.3891	28.7729	28.6631	26.9191	26.5361	27.3519	27.298	27.1469	27.191	27.6355	27.3525	27.2507	27.1163	27.1399	27.3287	28.8325	27.6862	26.7274	27.6218	26.9898	27.5011	28.6703	28.7465	28.9257	27.4295	27.2605	26.808	28.6469	26.6284	28.3193	28.6336	28.9137	28.7314	27.564
	P62081	P62081	40S ribosomal protein S7	1	RPS7	sp|P62081|RS7_HUMAN 40S ribosomal protein S7 OS=Homo sapiens OX=9606 GN=RPS7 PE=1 SV=1	28.1307	28.0345	27.8102	28.2059	28.4508	28.0883	28.1587	28.3239	28.2771	28.3358	28.5903	28.433	28.184	27.9993	28.1532	28.012	28.0272	27.922	28.4718	28.3784	28.7475	28.5437	28.4945	28.5639	28.0734	28.8264	29.3622	28.2136	28.4465	28.1914	27.1739	27.7703	27.9301	27.3669	27.5469	27.9594	27.9133	28.2124	28.0193	28.0801	27.9436	26.8089	28.1003
	O00159	O00159	Unconventional myosin-Ic	1	MYO1C	sp|O00159|MYO1C_HUMAN Unconventional myosin-Ic OS=Homo sapiens OX=9606 GN=MYO1C PE=1 SV=4	28.0837	28.0529	28.4607	28.9859	28.4537	28.8007	28.7666	27.5909	28.721	28.2841	28.6997	27.9496	27.1009	26.556	27.5914	27.9077	27.2586	27.4727	27.9248	27.892	27.7814	27.7459	27.5214	27.2191	28.2481	27.2047	26.1006	27.732	27.3846	27.9828	28.1711	28.2483	28.3846	27.0542	26.6082	26.1064	28.6271	26.5724	28.736	28.641	28.6416	27.7152	27.9647
	P62829	P62829	60S ribosomal protein L23	1	RPL23	sp|P62829|RL23_HUMAN 60S ribosomal protein L23 OS=Homo sapiens OX=9606 GN=RPL23 PE=1 SV=1	28.0695	27.9699	27.9554	27.6511	27.7312	27.9128	27.9515	27.9509	28.2376	27.7769	27.584	27.6946	28.0863	28.0314	28.3769	27.8029	28.0483	28.2195	28.543	28.6263	28.7631	28.8379	28.9183	28.8455	27.4741	27.6719	27.6636	28.4017	28.5166	28.6459	27.5584	27.5728	27.5416	28.669	28.9501	29.2286	28.5098	28.9973	28.3533	28.1524	28.3242	27.3454	28.7871
	P05386	P05386	60S acidic ribosomal protein P1	1	RPLP1	sp|P05386|RLA1_HUMAN 60S acidic ribosomal protein P1 OS=Homo sapiens OX=9606 GN=RPLP1 PE=1 SV=1	28.0457	27.2637	27.6642	27.8123	27.1443	27.805	29.274	30.1588	29.1843	28.8677	28.3155	27.2159	29.189	28.57	28.2927	28.9655	28.1545	28.6965	28.2419	30.2523	29.2055	30.0899	29.9097	28.1052	27.8229	27.7722	28.3507	28.4113	29.2779	29.181	27.5458	26.9058	27.1518	26.685	27.8424	27.5772	27.2479	27.6428	29.2279	27.5173	28.0941	24.9322	27.6269
	O75367	O75367	Core histone macro-H2A.1	1	H2AFY	sp|O75367|H2AY_HUMAN Core histone macro-H2A.1 OS=Homo sapiens OX=9606 GN=H2AFY PE=1 SV=4	28.0445	25.0857	25.4974	26.0424	26.9437	25.7409	24.2709	25.3216	26.0533	25.6696	24.4373	24.0947	26.1404	25.9335	28.7714	28.0928	26.5519	26.8677	26.7773	25.9832	25.4261	26.4072	27.8589	24.2997	25.2884	26.1683	26.118	27.7045	27.1605	27.0762	26.2459	27.2203	26.0818	26.6933	24.4364	24.7607	25.1795	27.6204	27.2275	24.0423	24.8837	25.6597	28.4445
	P26368	P26368	Splicing factor U2AF 65 kDa subunit	1	U2AF2	sp|P26368|U2AF2_HUMAN Splicing factor U2AF 65 kDa subunit OS=Homo sapiens OX=9606 GN=U2AF2 PE=1 SV=4	28.0443	28.0078	27.9782	27.3262	28.1883	27.4301	27.4361	28.0602	28.4966	27.3524	28.0009	27.9001	28.5391	27.9891	28.0863	28.4359	28.4844	28.7434	28.5907	28.8108	28.9267	28.7348	28.8751	28.1247	27.7157	27.518	28.7321	28.7855	29.0084	28.915	28.8482	28.146	27.8734	28.5588	28.7374	29.0023	27.7655	28.0234	27.7755	27.4413	28.0445	26.6986	27.7858
	P38159	P38159	RNA-binding motif protein, X chromosome;RNA-binding motif protein, X chromosome, N-terminally processed	4	RBMX	sp|P38159|RBMX_HUMAN RNA-binding motif protein, X chromosome OS=Homo sapiens OX=9606 GN=RBMX PE=1 SV=3	28.0304	27.5492	27.5861	27.8123	28.4255	28.1676	27.191	27.7834	27.0147	26.9207	27.7452	28.243	27.9914	27.9607	28.4807	28.4037	28.0384	28.1162	27.1843	26.7357	26.5495	27.1965	27.7044	27.0174	28.6808	27.8886	29.2435	29.236	28.5391	28.7581	28.5725	28.7967	28.4044	29.0445	29.6382	29.4752	26.9822	28.1788	27.1682	26.3353	28.0112	27.7687	27.0498
	P17066	P17066	Heat shock 70 kDa protein 6	2	HSPA6	sp|P17066|HSP76_HUMAN Heat shock 70 kDa protein 6 OS=Homo sapiens OX=9606 GN=HSPA6 PE=1 SV=2	28.0138	28.2019	27.8099	28.0344	28.466	27.6682	27.9014	27.5237	27.8542	27.9676	28.1866	27.6638	28.4815	28.3446	28.1439	27.9998	28.1366	27.6832	28.3595	27.7291	28.04	28.0828	27.9013	28.2575	28.0342	28.7928	27.9839	27.9505	27.6514	27.814	28.5155	27.7344	28.4299	28.3002	28.153	28.5759	28.2756	28.7701	28.4504	28.0838	28.1597	27.272	28.1063
	P23396	P23396	40S ribosomal protein S3	1	RPS3	sp|P23396|RS3_HUMAN 40S ribosomal protein S3 OS=Homo sapiens OX=9606 GN=RPS3 PE=1 SV=2	28.0094	27.995	27.9755	28.0198	28.0772	28.0293	28.3797	28.5335	28.3929	28.3505	28.1903	28.1117	28.0181	28.2539	27.9967	28.4638	28.4443	28.5291	28.6695	29.0237	29.057	29.3937	29.3577	28.9203	28.0236	28.1898	27.983	29.1669	29.4956	29.3721	27.9158	27.9298	27.9158	28.4067	28.2954	28.5471	28.4859	28.4537	28.5062	28.2322	27.9421	27.2283	28.8519
	Q5JRA6	Q5JRA6	Melanoma inhibitory activity protein 3	1	MIA3	sp|Q5JRA6|TGO1_HUMAN Transport and Golgi organization protein 1 homolog OS=Homo sapiens OX=9606 GN=MIA3 PE=1 SV=1	28.0079	27.9236	27.8713	27.7248	27.895	27.7513	27.7189	28.1061	27.3063	25.7302	27.8948	27.7197	28.4927	28.1672	28.0531	27.9179	28.2611	28.2404	28.3741	28.8491	28.803	28.8281	28.0642	27.7619	27.1069	27.7428	27.8661	28.1404	28.9269	28.2672	27.8824	27.8993	27.8604	28.4408	27.9928	28.3217	27.8891	28.1061	28.3317	27.6671	27.746	28.2532	27.6301
	P35268	P35268	60S ribosomal protein L22	1	RPL22	sp|P35268|RL22_HUMAN 60S ribosomal protein L22 OS=Homo sapiens OX=9606 GN=RPL22 PE=1 SV=2	28.0077	28.0307	28.1252	27.7351	28.1531	27.9505	27.8971	27.95	28.0354	28.0864	28.13	28.2998	28.0657	28.154	28.3209	27.3689	27.9702	28.049	28.7732	28.8287	28.939	28.9719	29.0192	28.7524	27.7223	28.0789	28.7601	28.5949	28.8731	28.5005	28.4206	28.4639	28.1823	27.8823	28.1866	28.3904	28.117	28.2412	28.1754	27.714	27.8893	27.9564	28.7367
	Q9Y281	Q9Y281	Cofilin-2	1	CFL2	sp|Q9Y281|COF2_HUMAN Cofilin-2 OS=Homo sapiens OX=9606 GN=CFL2 PE=1 SV=1	27.9724	26.4049	27.9167	28.1999	29.9018	28.2438	25.8441	26.0054	26.1846	28.224	28.4462	26.52	27.101	27.252	28.5148	24.5124	27.3024	27.1842	27.4633	21.855	25.2848	26.5367	27.0475	26.0679	30.1242	28.5043	22.8375	28.3824	26.906	26.4296	31.7396	31.1694	30.7346	30.7301	24.0361	23.6612	25.2179	27.2598	26.9312	28.3257	29.4035	29.5595	26.3068
	O43660	O43660	Pleiotropic regulator 1	1	PLRG1	sp|O43660|PLRG1_HUMAN Pleiotropic regulator 1 OS=Homo sapiens OX=9606 GN=PLRG1 PE=1 SV=1	27.9568	27.2133	27.3411	26.1656	27.3482	27.4034	27.2999	27.8068	27.7367	27.1975	27.0395	27.9233	28.1238	27.8227	28.2711	27.5892	27.7679	27.6362	28.8837	28.7982	28.827	28.0238	28.717	28.1748	27.5407	27.19	28.9288	27.8003	27.7722	27.7074	27.9046	27.4693	27.2602	29.4499	29.8861	30.0272	27.3738	28.0859	27.2722	27.7156	28.0526	28.7572	28.0866
	Q6ZRS2	Q6ZRS2	Helicase SRCAP	1	SRCAP	sp|Q6ZRS2|SRCAP_HUMAN Helicase SRCAP OS=Homo sapiens OX=9606 GN=SRCAP PE=1 SV=3	27.9551	28.8642	28.385	28.3772	28.8125	28.1127	27.8983	28.0013	27.7286	23.5116	28.1653	28.1586	28.3417	28.4457	29.9758	29.1606	28.0144	29.2062	27.8717	27.786	27.3829	28.0599	28.2045	28.4086	29.3976	28.2531	27.7604	28.1612	28.6359	28.0746	29.8519	27.7502	28.1357	30.998	27.5573	27.5068	27.9536	28.5815	28.0184	30.0952	29.2638	28.0124	29.3126
	P46778	P46778	60S ribosomal protein L21	1	RPL21	sp|P46778|RL21_HUMAN 60S ribosomal protein L21 OS=Homo sapiens OX=9606 GN=RPL21 PE=1 SV=2	27.9546	28.3368	27.939	27.6736	27.7671	27.3839	27.1318	27.7083	27.6075	27.4158	28.4488	29.012	27.6382	28.0539	27.5428	26.702	27.0425	26.9845	28.9816	28.3662	28.6957	28.2917	28.6773	29.4153	28.4965	28.6588	29.6378	27.3607	27.5125	27.5564	27.951	27.9937	27.8244	27.7167	28.1422	27.7398	27.494	27.3659	27.436	27.5295	27.785	29.4282	25.9528
	P41252	P41252	Isoleucine--tRNA ligase, cytoplasmic	1	IARS	sp|P41252|SYIC_HUMAN Isoleucine--tRNA ligase, cytoplasmic OS=Homo sapiens OX=9606 GN=IARS PE=1 SV=2	27.9531	28.351	28.237	28.579	28.4061	28.3164	28.3686	27.8532	28.1149	27.9776	28.4977	27.8249	27.3834	28.0057	27.2871	27.9287	27.7862	27.8286	27.7227	27.7431	27.9591	27.4459	27.4641	27.4701	28.1345	27.4359	26.9036	27.9437	27.7952	27.9816	28.1473	28.0075	27.9766	27.8551	27.9836	27.5223	28.721	27.3313	28.5265	28.0167	28.2703	28.2196	28.1403
	P0DMV9	P0DMV9;P0DMV8	Heat shock 70 kDa protein 1B;Heat shock 70 kDa protein 1A	2	HSPA1B	sp|P0DMV9|HS71B_HUMAN Heat shock 70 kDa protein 1B OS=Homo sapiens OX=9606 GN=HSPA1B PE=1 SV=1;sp|P0DMV8|HS71A_HUMAN Heat shock 70 kDa protein 1A OS=Homo sapiens OX=9606 GN=HSPA1A PE=1 SV=1	27.9426	27.696	27.6739	28.447	28.3351	28.2851	28.2708	28.1963	28.2965	27.9282	28.2013	27.8303	27.7575	27.7589	27.4431	27.7941	27.7789	28.007	27.7796	28.0657	28.0252	28.0505	27.6672	27.4466	27.9808	28.3024	27.5531	27.6529	27.6976	27.8639	28.0928	28.0092	27.8081	28.5013	28.4406	28.6383	28.1958	28.146	28.66	28.1741	28.2528	27.0989	27.9158
	P31942	P31942	Heterogeneous nuclear ribonucleoprotein H3	1	HNRNPH3	sp|P31942|HNRH3_HUMAN Heterogeneous nuclear ribonucleoprotein H3 OS=Homo sapiens OX=9606 GN=HNRNPH3 PE=1 SV=2	27.9425	28.0995	28.1052	28.0049	28.0113	27.9877	27.3996	28.0994	27.3289	28.0685	28.0428	28.7384	28.9137	28.4139	28.3093	27.9046	28.5374	28.265	27.8554	27.7447	27.7393	27.8498	27.8633	28.317	28.0548	27.9059	29.398	27.6407	27.7171	27.2989	27.9078	28.0072	28.1569	27.5871	28.068	28.5384	27.8203	28.7676	27.6306	28.3376	27.8545	28.1406	27.8475
	P62851	P62851	40S ribosomal protein S25	1	RPS25	sp|P62851|RS25_HUMAN 40S ribosomal protein S25 OS=Homo sapiens OX=9606 GN=RPS25 PE=1 SV=1	27.9369	28.0634	27.886	28.2775	29.1873	28.4561	26.9407	27.1271	28.1887	26.5764	26.2892	28.5326	26.494	27.3324	26.8141	26.8196	26.9849	27.5325	28.3589	27.7293	26.7488	28.0271	27.9045	27.1158	28.3016	29.1117	28.2289	27.7328	26.2983	27.8704	27.6103	28.0335	28.0352	27.3347	28.2602	27.9393	26.961	27.5166	28.4341	25.7203	27.7391	26.5456	26.7521
	P05141	P05141	ADP/ATP translocase 2;ADP/ATP translocase 2, N-terminally processed	2	SLC25A5	sp|P05141|ADT2_HUMAN ADP/ATP translocase 2 OS=Homo sapiens OX=9606 GN=SLC25A5 PE=1 SV=7	27.9329	27.961	28.0865	27.641	27.9862	27.8323	28.176	28.1049	27.9117	27.8367	27.9968	27.6963	28.3912	28.3748	28.1097	28.4159	28.375	28.2852	28.0593	28.099	28.5589	28.9496	28.8648	28.6866	27.5003	27.6814	27.7402	28.4573	28.6334	28.4805	27.8948	27.299	27.5665	28.3983	28.5848	28.8707	28.5872	28.4356	28.5152	28.0347	28.0899	26.4088	28.8257
	P52907	P52907	F-actin-capping protein subunit alpha-1	1	CAPZA1	sp|P52907|CAZA1_HUMAN F-actin-capping protein subunit alpha-1 OS=Homo sapiens OX=9606 GN=CAPZA1 PE=1 SV=3	27.9222	27.8516	28.0155	28.1274	27.2826	27.7247	28.4171	27.6897	28.3594	27.6352	27.5104	27.2311	26.764	26.4498	27.2152	27.885	27.0186	27.1028	27.3122	27.5048	27.4544	27.1976	27.0668	26.9224	27.6511	26.8038	25.6916	27.5889	27.0349	27.7902	27.5635	27.3666	27.62	26.4576	26.6278	26.0124	28.1329	26.4629	28.6305	27.9066	27.8322	26.2867	27.6656
	Q8WVM8	Q8WVM8	Sec1 family domain-containing protein 1	1	SCFD1	sp|Q8WVM8|SCFD1_HUMAN Sec1 family domain-containing protein 1 OS=Homo sapiens OX=9606 GN=SCFD1 PE=1 SV=4	27.9088	27.8621	27.904	27.919	29.0567	29.2909	27.6655	27.8303	27.8269	27.8559	28.7686	28.411	27.8726	27.8067	27.6051	28.1403	27.7167	27.672	27.7536	27.6313	27.7536	27.517	27.6797	27.6657	28.3143	28.5077	28.1265	27.6698	27.6427	27.6684	28.9191	29.4188	28.4837	27.714	27.0911	27.71	27.925	27.6809	27.6929	26.9247	28.2428	27.9251	27.7882
	P61353	P61353	60S ribosomal protein L27	1	RPL27	sp|P61353|RL27_HUMAN 60S ribosomal protein L27 OS=Homo sapiens OX=9606 GN=RPL27 PE=1 SV=2	27.9028	27.1855	27.3101	26.3249	27.7123	27.1144	27.2852	27.6949	26.8542	26.8461	26.3217	27.328	26.1968	27.6542	26.481	26.6022	26.1571	26.432	28.7408	28.3903	27.6757	28.9095	28.7387	27.9172	27.4589	28.2369	27.0745	26.8016	25.1084	27.164	27.6108	27.672	27.4864	25.6356	26.9998	26.3468	26.0181	25.793	26.7878	25.9382	25.7649	25.4125	25.3188
	Q9NZI8	Q9NZI8	Insulin-like growth factor 2 mRNA-binding protein 1	1	IGF2BP1	sp|Q9NZI8|IF2B1_HUMAN Insulin-like growth factor 2 mRNA-binding protein 1 OS=Homo sapiens OX=9606 GN=IGF2BP1 PE=1 SV=2	27.8885	27.6959	27.8195	27.835	27.9096	27.7444	28.0816	28.834	27.9983	28.5389	28.3339	28.079	28.5642	28.1079	28.0427	28.4834	28.5121	28.5587	27.6977	27.8528	27.8426	27.7982	27.9936	27.5267	28.0064	27.4721	28.0297	27.903	28.2326	27.9174	28.446	28.2163	28.0239	28.2282	28.2267	28.3699	27.471	28.0312	27.732	27.8916	27.87	26.9117	27.9237
	P46781	P46781	40S ribosomal protein S9	1	RPS9	sp|P46781|RS9_HUMAN 40S ribosomal protein S9 OS=Homo sapiens OX=9606 GN=RPS9 PE=1 SV=3	27.8817	27.6295	27.7007	28.0585	28.1687	27.5422	28.36	28.8741	28.2954	28.7147	28.7158	28.5536	28.5826	28.1386	27.7832	28.6708	28.1858	28.1738	28.9542	29.3317	29.0743	29.5116	29.5822	29.1689	28.9416	28.4163	29.1501	28.4674	28.992	28.8052	29.2492	28.6877	28.6567	28.5563	28.4829	28.7701	27.7532	28.2934	28.1698	28.7929	28.4101	26.7046	27.6829
	P43243	P43243	Matrin-3	1	MATR3	sp|P43243|MATR3_HUMAN Matrin-3 OS=Homo sapiens OX=9606 GN=MATR3 PE=1 SV=2	27.8773	27.1966	27.4822	27.161	27.5654	27.1589	27.5106	28.3046	27.9227	27.8195	27.5156	27.2313	28.4251	27.958	28.4774	28.4435	28.1291	28.4359	27.4386	27.4129	27.3015	27.2606	27.7584	26.8567	27.6462	26.9972	27.2603	27.9429	28.2751	28.0358	27.7711	27.9559	27.4265	27.9482	27.8676	27.9038	27.2666	28.1654	27.6896	27.3659	27.0948	26.7818	28.4663
	P46777	P46777	60S ribosomal protein L5	1	RPL5	sp|P46777|RL5_HUMAN 60S ribosomal protein L5 OS=Homo sapiens OX=9606 GN=RPL5 PE=1 SV=3	27.8603	27.8189	27.5376	26.5863	27.7997	27.4331	27.7998	27.8747	27.7158	27.6994	28.0874	27.9421	27.4892	27.9521	27.5471	27.2817	27.4689	27.7068	28.2957	28.5668	28.7517	28.7199	28.7493	28.492	27.8138	28.4835	28.2311	27.7305	28.0547	28.0645	27.8526	27.7962	27.6276	27.6932	27.7927	27.9338	27.2434	27.3078	27.4741	26.9534	27.5416	26.642	27.376
	Q96JB1	Q96JB1	Dynein heavy chain 8, axonemal	1	DNAH8	sp|Q96JB1|DYH8_HUMAN Dynein heavy chain 8, axonemal OS=Homo sapiens OX=9606 GN=DNAH8 PE=1 SV=2	27.8343	27.6633	27.7174	27.6228	28.1783	27.456	27.8319	27.9171	27.7959	27.5081	27.4164	27.5535	27.9152	27.7703	27.7285	27.5906	27.9459	28.3651	27.7873	28.2098	27.8214	27.7378	28.4505	27.6842	21.9648	26.8982	27.3385	27.7947	27.8442	27.8398	27.4952	27.6819	28.4621	28.0474	26.6777	26.4765	27.6082	27.8153	27.7677	27.8544	28.5977	27.4742	28.1063
	P62906	P62906	60S ribosomal protein L10a	1	RPL10A	sp|P62906|RL10A_HUMAN 60S ribosomal protein L10a OS=Homo sapiens OX=9606 GN=RPL10A PE=1 SV=2	27.8291	27.6996	27.8404	27.5139	27.3679	27.6329	27.9268	28.588	28.0905	28.4661	28.4732	27.8693	28.3897	27.9868	27.9385	27.731	27.3182	27.6191	28.7172	29.0911	28.8323	29.2577	29.3465	28.7939	28.3931	28.3997	28.4996	27.7442	28.1958	27.6806	27.7568	27.7912	27.6793	27.5605	27.5633	27.7949	27.4501	27.698	27.9009	27.9021	27.7803	26.0334	27.1915
	P08238	P08238	Heat shock protein HSP 90-beta	2	HSP90AB1	sp|P08238|HS90B_HUMAN Heat shock protein HSP 90-beta OS=Homo sapiens OX=9606 GN=HSP90AB1 PE=1 SV=4	27.8275	27.5282	27.7044	28.2875	28.0908	28.013	28.4155	27.8876	28.223	28.0658	28.0001	27.6849	27.488	27.9254	27.263	27.8235	27.7588	27.9731	27.5894	27.6347	27.8858	27.941	27.4141	27.3551	27.385	28.2153	27.0641	27.7535	27.6563	28.0132	27.9065	27.6521	27.6602	27.7409	27.6917	27.524	28.3016	27.3493	28.5281	27.9664	27.9067	27.2361	27.8153
	Q9BV73	Q9BV73	Centrosome-associated protein CEP250	1	CEP250	sp|Q9BV73|CP250_HUMAN Centrosome-associated protein CEP250 OS=Homo sapiens OX=9606 GN=CEP250 PE=1 SV=2	27.8254	27.9586	28.212	27.9821	26.201	27.931	27.6616	26.5164	27.7757	25.7156	26.5452	27.2441	25.5389	25.7746	26.963	26.6276	26.7163	26.9139	26.8417	26.9497	27.0116	26.3025	27.4568	26.4339	27.4769	25.6798	23.4882	26.5894	26.4607	26.6659	27.1668	27.439	27.6505	25.5377	26.4292	25.2932	28.2296	25.1201	27.6996	27.6241	26.9895	25.172	26.0911
	P62888	P62888	60S ribosomal protein L30	1	RPL30	sp|P62888|RL30_HUMAN 60S ribosomal protein L30 OS=Homo sapiens OX=9606 GN=RPL30 PE=1 SV=2	27.8105	27.6355	27.8081	27.3971	27.9649	27.3748	27.5619	28.0783	27.373	28.1861	28.2814	28.3256	27.9614	28.0944	27.6559	26.6694	27.1163	27.0804	28.7051	28.6125	29.0567	29.0265	29.1139	29.0392	28.7506	28.7738	29.1729	27.7179	27.9774	27.7121	28.245	27.9677	28.1926	27.9089	27.5915	27.92	27.4911	28.0311	27.3032	28.2596	28.0941	26.7397	26.7744
	P83731	P83731	60S ribosomal protein L24	1	RPL24	sp|P83731|RL24_HUMAN 60S ribosomal protein L24 OS=Homo sapiens OX=9606 GN=RPL24 PE=1 SV=1	27.8101	27.2607	27.3598	26.4662	27.5199	26.941	26.7861	26.6835	25.9626	25.6496	25.496	27.189	25.4791	27.266	25.7583	24.7853	26.2419	26.0726	28.5708	27.9776	26.9999	28.3237	28.1182	27.211	27.255	27.4622	26.501	27.2228	25.3005	26.6596	26.7984	27.5338	27.3257	25.8875	27.323	26.9753	25.8458	26.2846	26.3689	25.258	25.7984	25.9193	24.7953
	P26599	P26599	Polypyrimidine tract-binding protein 1	1	PTBP1	sp|P26599|PTBP1_HUMAN Polypyrimidine tract-binding protein 1 OS=Homo sapiens OX=9606 GN=PTBP1 PE=1 SV=1	27.8045	27.4078	27.5139	27.7933	28.1984	27.6897	27.8948	28.5158	28.1296	28.3623	28.6048	27.8077	28.4805	28.1275	28.1379	28.4045	27.9704	28.2189	27.6406	28.0661	27.8602	27.9632	28.1601	27.8254	27.6512	27.6624	27.4763	27.5891	28.0346	28.139	27.7889	27.4477	26.9273	28.0676	27.5615	27.9681	27.2241	28.06	27.6259	27.6576	27.4176	27.575	28.3612
	P53999	P53999	Activated RNA polymerase II transcriptional coactivator p15	1	SUB1	sp|P53999|TCP4_HUMAN Activated RNA polymerase II transcriptional coactivator p15 OS=Homo sapiens OX=9606 GN=SUB1 PE=1 SV=3	27.7949	27.3964	27.6718	26.3612	26.9366	26.4396	27.5254	28.2104	27.5916	27.3363	27.188	26.1141	28.9321	28.2578	27.957	29.0343	28.4652	28.649	26.9544	27.7925	27.3139	27.8383	27.8504	27.1108	26.5727	26.499	26.2743	27.3024	27.9189	27.5538	27.1219	26.8002	26.7402	27.3684	26.9839	27.5716	26.8317	28.1382	27.7493	26.4501	26.6862	25.7982	27.977
	O75369	O75369	Filamin-B	1	FLNB	sp|O75369|FLNB_HUMAN Filamin-B OS=Homo sapiens OX=9606 GN=FLNB PE=1 SV=2	27.7673	27.9426	27.9695	27.912	27.7178	27.8458	28.1331	26.8963	27.9439	27.364	27.6647	27.4798	26.522	26.3861	27.2965	27.0565	26.7882	26.7362	27.3231	27.1876	27.1902	26.9258	26.8696	26.8879	27.5415	27.0295	25.9512	27.3562	26.6005	27.4005	27.6115	27.5622	27.6989	26.6772	26.7073	26.1909	28.1127	26.205	27.9571	27.4906	27.7206	27.4075	27.3667
	Q8NCA5	Q8NCA5	Protein FAM98A	1	FAM98A	sp|Q8NCA5|FA98A_HUMAN Protein FAM98A OS=Homo sapiens OX=9606 GN=FAM98A PE=1 SV=1	27.7586	27.8611	27.8218	26.0718	25.9623	26.9185	27.3817	27.8394	27.6521	26.9657	27.2139	26.0795	27.3558	27.0998	26.7985	28.4779	28.1575	28.5433	27.1596	27.4239	27.4397	27.1459	27.1218	26.9423	26.3394	26.5858	27.1482	27.8492	28.2491	28.2313	26.8831	26.4438	26.2678	27.1143	27.6389	27.9715	26.831	27.4572	27.2209	27.0107	27.1461	25.6707	27.8733
	P62899	P62899	60S ribosomal protein L31	1	RPL31	sp|P62899|RL31_HUMAN 60S ribosomal protein L31 OS=Homo sapiens OX=9606 GN=RPL31 PE=1 SV=1	27.7582	28.211	28.1222	28.1216	28.0505	27.7964	27.6217	27.9952	27.6382	28.4923	28.1975	28.0343	27.8637	27.7287	27.8554	27.4218	27.4902	27.4538	28.5239	28.5718	28.6387	28.7732	28.7768	29.2587	28.6179	28.9722	29.2073	27.8611	28.2862	27.8189	28.7315	28.7665	28.9074	28.2468	28.1658	28.0583	27.6087	28.0045	27.251	27.9796	28.2252	28.3186	26.9155
	P11940	P11940	Polyadenylate-binding protein 1	4	PABPC1	sp|P11940|PABP1_HUMAN Polyadenylate-binding protein 1 OS=Homo sapiens OX=9606 GN=PABPC1 PE=1 SV=2	27.7572	27.7478	27.8255	27.6475	27.6252	27.382	28.5174	29.1665	28.3943	27.7611	27.3885	27.3421	27.995	27.9596	27.5638	30.7047	31.1174	31.0378	27.4183	27.8043	27.6625	27.5275	27.6267	27.409	27.4588	27.5595	27.9063	29.1441	29.7205	29.3018	28.3031	27.9349	27.8415	29.0069	29.2695	29.4793	27.5242	27.8116	27.5152	27.8778	27.7127	27.4078	28.4442
	Q86V81	Q86V81	THO complex subunit 4	1	ALYREF	sp|Q86V81|THOC4_HUMAN THO complex subunit 4 OS=Homo sapiens OX=9606 GN=ALYREF PE=1 SV=3	27.7527	27.7361	27.3542	26.9334	27.6236	27.2392	27.0359	27.5776	27.4913	27.1024	27.7193	27.2875	28.1587	28.2038	28.105	27.4929	27.6508	27.7274	28.1298	27.7213	28.3023	27.8817	28.0194	27.9857	27.2013	27.0221	27.9964	27.9324	27.7719	27.5189	27.4798	27.6046	27.2271	27.764	27.8913	27.8164	27.3587	28.1514	27.1652	27.0515	27.7595	27.1027	30.3027
	Q15424	Q15424	Scaffold attachment factor B1	1	SAFB	sp|Q15424|SAFB1_HUMAN Scaffold attachment factor B1 OS=Homo sapiens OX=9606 GN=SAFB PE=1 SV=4	27.7418	27.6842	27.5188	27.0861	27.6511	27.1266	26.6344	27.4977	26.7615	28.028	27.6292	27.8527	28.5247	28.2572	28.4257	27.9046	28.1312	28.0845	26.881	26.7802	26.4939	27.3401	27.699	27.414	28.0783	27.5373	28.5792	27.7401	27.7884	27.4664	27.8855	28.1636	28.0415	28.6099	28.5096	28.5975	27.0795	28.2053	27.1178	27.4184	27.4822	27.8808	28.0504
	Q16629	Q16629	Serine/arginine-rich splicing factor 7	1	SRSF7	sp|Q16629|SRSF7_HUMAN Serine/arginine-rich splicing factor 7 OS=Homo sapiens OX=9606 GN=SRSF7 PE=1 SV=1	27.7392	27.7095	27.567	27.0497	27.1122	27.4241	27.069	27.7798	27.4792	26.8315	27.2415	27.5553	28.1045	28.0724	28.2847	28.4599	28.5645	28.4118	27.9904	27.3811	27.6495	27.5054	28.0088	27.9564	27.365	27.1121	27.7324	28.5212	28.4923	28.6961	27.5291	27.6467	27.7028	29.8438	30.351	30.3731	27.018	27.6855	27.106	27.0423	27.2539	27.458	28.2379
	P06753	P06753	Tropomyosin alpha-3 chain	1	TPM3	sp|P06753|TPM3_HUMAN Tropomyosin alpha-3 chain OS=Homo sapiens OX=9606 GN=TPM3 PE=1 SV=2	27.7254	27.6002	27.9056	28.5882	28.3231	28.3876	27.9773	26.9336	27.7662	27.5904	28.3796	27.6936	26.5475	26.4352	27.133	27.0668	27.16	26.9198	27.3971	27.4052	27.2638	27.1755	27.1085	26.9175	28.1596	27.4904	26.5936	27.2812	26.7365	27.4157	28.5754	28.3304	28.6174	26.8386	26.6301	26.3455	28.4047	26.1992	28.1036	28.247	28.6644	28.3461	26.997
	P39023	P39023	60S ribosomal protein L3	1	RPL3	sp|P39023|RL3_HUMAN 60S ribosomal protein L3 OS=Homo sapiens OX=9606 GN=RPL3 PE=1 SV=2	27.7212	27.5018	27.5856	27.5341	27.7624	27.5812	27.584	27.928	27.6686	28.7794	28.6851	28.3965	28.1249	27.9039	27.4992	27.0065	27.0637	27.1694	28.4187	28.6343	28.5272	28.9667	29.1328	28.7079	28.8318	28.874	28.8474	27.6329	27.9596	27.5729	28.3486	28.1147	28.3538	27.6699	27.7876	27.9565	27.3991	27.6405	27.5325	28.0381	28.1408	27.7786	26.9944
	P18621	P18621	60S ribosomal protein L17	1	RPL17	sp|P18621|RL17_HUMAN 60S ribosomal protein L17 OS=Homo sapiens OX=9606 GN=RPL17 PE=1 SV=3	27.7194	27.5292	27.5078	27.0985	27.2413	27.1561	27.6836	28.0883	27.9231	27.8276	28.1081	27.6646	28.2084	27.7651	27.5202	27.9266	27.4209	27.7247	28.2645	28.5516	28.4743	28.8097	28.7881	28.6918	28.0846	27.8659	28.1718	27.8678	28.3694	28.1875	27.8803	27.689	27.8092	27.4252	27.62	27.7283	27.3248	27.7084	27.6733	27.5575	27.4533	26.6404	27.3143
	P21333	P21333	Filamin-A	1	FLNA	sp|P21333|FLNA_HUMAN Filamin-A OS=Homo sapiens OX=9606 GN=FLNA PE=1 SV=4	27.7172	27.8059	27.9121	27.7679	27.5301	27.7437	27.8051	26.7027	27.7531	27.0856	27.4914	27.3466	26.2203	26.1886	26.7715	26.6795	26.4404	26.3696	27.0956	26.8431	26.9404	26.6607	26.4931	26.5045	27.5464	27.0348	25.9117	26.9527	26.2685	26.9865	27.3516	27.3976	27.4945	26.2717	26.3669	25.9521	27.9281	26.1632	27.831	27.0767	27.3289	27.2435	27.1397
	O43795	O43795	Unconventional myosin-Ib	1	MYO1B	sp|O43795|MYO1B_HUMAN Unconventional myosin-Ib OS=Homo sapiens OX=9606 GN=MYO1B PE=1 SV=3	27.7125	27.7303	27.8938	28.0279	27.5627	28.0763	28.315	27.0636	28.2545	27.3644	27.6367	27.3964	26.3427	26.2423	27.3233	27.3393	26.8297	26.9874	27.4615	27.4107	27.3068	27.0285	27.0012	26.8859	27.3815	26.3585	25.2517	27.3085	26.7506	27.5431	27.263	27.2994	27.43	26.4413	26.3345	25.6139	28.2005	25.9648	28.2415	27.7823	27.8819	26.7453	27.4962
	O94832	O94832	Unconventional myosin-Id	1	MYO1D	sp|O94832|MYO1D_HUMAN Unconventional myosin-Id OS=Homo sapiens OX=9606 GN=MYO1D PE=1 SV=2	27.704	27.876	27.8842	28.2279	28.1381	28.444	28.4179	27.1178	28.3813	28.0637	28.099	27.8395	26.8819	26.1611	26.9986	27.518	26.8108	27.045	27.3273	27.5898	27.2389	26.9458	27.0744	26.9412	28.1506	26.7914	25.8125	27.3567	26.9069	27.5131	28.0557	28.1754	28.2837	26.6185	26.3308	25.4635	28.3746	26.1437	28.4303	28.1984	28.3589	28.2727	27.5774
	P27635	P27635;Q96L21	60S ribosomal protein L10;60S ribosomal protein L10-like	2	RPL10	sp|P27635|RL10_HUMAN 60S ribosomal protein L10 OS=Homo sapiens OX=9606 GN=RPL10 PE=1 SV=4;sp|Q96L21|RL10L_HUMAN 60S ribosomal protein L10-like OS=Homo sapiens OX=9606 GN=RPL10L PE=1 SV=3	27.6925	27.6824	27.7461	27.9846	27.8029	27.8495	27.8685	28.0098	27.8937	28.0951	28.5819	28.6025	28.3971	27.7299	27.6545	27.1421	27.6014	27.3377	28.4481	28.6772	28.4332	28.9763	28.9226	29.0448	28.609	28.1865	29.1596	28.4891	28.678	28.3624	28.4951	28.318	28.4673	28.1533	27.9004	28.4566	27.5968	27.907	27.7205	28.1605	28.2419	28.6001	26.9952
	P62266	P62266	40S ribosomal protein S23	1	RPS23	sp|P62266|RS23_HUMAN 40S ribosomal protein S23 OS=Homo sapiens OX=9606 GN=RPS23 PE=1 SV=3	27.6871	27.78	27.4968	27.4466	28.0083	27.7831	27.2211	27.0656	27.361	27.2453	27.6339	28.8392	27.2826	27.5709	27.5052	27.076	27.0168	27.072	28.8124	28.2133	28.8473	28.7446	28.8485	29.195	28.5128	28.3584	28.8348	27.6757	27.7477	27.4965	27.92	28.4214	28.4535	27.4913	28.0726	28.1324	27.4649	27.8706	26.7251	27.8751	28.0842	26.971	26.3969
	P06746	P06746	DNA polymerase beta	1	POLB	sp|P06746|DPOLB_HUMAN DNA polymerase beta OS=Homo sapiens OX=9606 GN=POLB PE=1 SV=3	27.6255	27.333	27.5799	27.1232	27.6176	27.0723	27.2975	28.3202	27.3239	28.5754	27.9183	27.1209	28.4168	27.861	27.3436	27.9445	28.0609	28.3015	27.1962	27.6649	27.3403	27.4934	27.4097	26.5275	27.6898	27.1052	27.5953	26.8749	27.8255	27.6129	27.3984	27.2385	27.2008	27.5685	27.207	28.008	26.9714	28.0062	27.4117	27.2561	27.2485	26.569	27.7002
	P62241	P62241	40S ribosomal protein S8	1	RPS8	sp|P62241|RS8_HUMAN 40S ribosomal protein S8 OS=Homo sapiens OX=9606 GN=RPS8 PE=1 SV=2	27.5978	27.2826	27.3292	26.6996	27.2608	27.3776	27.3284	27.6429	27.0613	25.8705	26.1516	27.2454	26.3044	27.0887	26.4796	26.8112	26.3074	26.3929	28.4966	28.2175	27.5061	28.4943	28.4848	27.3874	27.7013	27.7819	26.9677	27.1687	26.1628	27.4386	27.455	27.6767	27.2736	26.0943	27.2353	26.8219	26.0769	26.212	27.1066	25.767	25.8933	26.8625	25.0456
	P23246	P23246	Splicing factor, proline- and glutamine-rich	1	SFPQ	sp|P23246|SFPQ_HUMAN Splicing factor, proline- and glutamine-rich OS=Homo sapiens OX=9606 GN=SFPQ PE=1 SV=2	27.5956	27.8746	27.5236	28.0334	28.5276	28.1164	27.1207	28.0157	27.2139	28.4973	28.2553	28.4638	28.379	28.2625	27.4365	27.7733	28.1313	27.9687	27.7069	27.4794	27.8249	27.657	27.5985	27.8465	28.4763	28.0828	29.0479	27.9792	28.3251	27.8422	28.4108	28.118	28.3072	28.4999	28.6526	28.7995	27.4956	27.7251	27.4682	27.6225	28.3578	28.0021	27.4564
	Q9UN86	Q9UN86	Ras GTPase-activating protein-binding protein 2	1	G3BP2	sp|Q9UN86|G3BP2_HUMAN Ras GTPase-activating protein-binding protein 2 OS=Homo sapiens OX=9606 GN=G3BP2 PE=1 SV=2	27.5718	27.7974	27.5787	27.7247	27.4688	27.6443	27.8587	28.5578	27.6491	27.9752	27.8036	28.2338	27.324	27.1233	26.9447	28.8156	28.966	28.7489	28.1535	28.2346	28.4682	27.9982	28.2714	28.1414	27.9044	27.4577	28.2493	28.6881	28.8615	28.487	28.1532	27.8069	27.8963	27.4783	27.7928	28.0951	26.983	27.7675	26.6738	27.0487	27.2184	27.3545	26.7882
	P10809	P10809	60 kDa heat shock protein, mitochondrial	1	HSPD1	sp|P10809|CH60_HUMAN 60 kDa heat shock protein, mitochondrial OS=Homo sapiens OX=9606 GN=HSPD1 PE=1 SV=2	27.5716	27.518	27.2311	27.091	27.5324	27.0409	27.2234	27.1676	27.172	26.9374	26.9274	27.0388	27.1393	28.1762	27.1497	26.7447	27.3713	27.4045	27.3241	26.9765	27.7722	27.9008	27.0222	27.3415	26.6316	27.0526	26.8875	27.2582	27.2392	27.3469	26.8676	26.5111	26.5589	27.7574	27.6147	27.6507	27.3726	26.7274	27.4988	26.8866	26.6986	26.4967	27.1397
	P67936	P67936	Tropomyosin alpha-4 chain	2	TPM4	sp|P67936|TPM4_HUMAN Tropomyosin alpha-4 chain OS=Homo sapiens OX=9606 GN=TPM4 PE=1 SV=3	27.5702	27.6486	27.7752	28.907	28.1708	28.5577	27.7591	26.8679	27.5709	27.6779	27.8788	28.1119	26.3748	25.9709	27.0062	27.7224	26.6027	26.9299	27.1877	26.9188	26.868	26.7327	26.6348	27.0694	28.1295	27.2348	25.5775	26.6398	26.2791	26.6255	28.0978	28.2923	28.3145	26.5915	26.2172	25.3439	28.1341	25.7876	27.5587	28.3727	28.3391	29.6456	26.7642
	P04899	P04899	Guanine nucleotide-binding protein G(i) subunit alpha-2	3	GNAI2	sp|P04899|GNAI2_HUMAN Guanine nucleotide-binding protein G(i) subunit alpha-2 OS=Homo sapiens OX=9606 GN=GNAI2 PE=1 SV=3	27.5688	27.1242	27.6267	27.7846	27.9193	27.7577	27.9779	27.0661	28.2757	27.5166	27.9176	27.2954	26.9647	26.5426	26.8035	27.3257	26.8697	27.1639	27.2585	27.3117	27.1189	26.6792	26.6886	26.8604	27.6621	26.2685	24.6566	27.3179	27.1674	27.9004	27.9985	27.7794	27.5857	26.4848	26.6458	26.0133	27.7641	25.8941	28.0796	27.2875	27.6297	26.0966	27.593
	Q8NC51	Q8NC51	Plasminogen activator inhibitor 1 RNA-binding protein	1	SERBP1	sp|Q8NC51|PAIRB_HUMAN Plasminogen activator inhibitor 1 RNA-binding protein OS=Homo sapiens OX=9606 GN=SERBP1 PE=1 SV=2	27.5554	27.4468	27.424	27.947	28.1798	27.8789	27.2204	28.2313	27.5381	29.1344	28.1962	28.0029	28.7665	27.8767	27.3919	28.3353	27.9848	28.0082	27.7077	27.943	27.5773	28.0105	27.9172	28.0887	28.5137	27.9335	28.5842	27.5438	27.951	27.7619	28.5526	28.0287	28.2676	28.644	28.484	28.6663	27.1558	27.9606	27.5898	27.7103	28.3607	27.0972	28.1811
	Q15796	Q15796	Mothers against decapentaplegic homolog 2	1	SMAD2	sp|Q15796|SMAD2_HUMAN Mothers against decapentaplegic homolog 2 OS=Homo sapiens OX=9606 GN=SMAD2 PE=1 SV=1	27.5253	27.0071	27.0787	26.0427	26.5677	27.5686	26.4616	26.372	26.841	25.8527	26.4885	26.3868	26.1827	26.921	26.3419	26.8327	26.9021	26.6026	26.8131	26.2094	26.7419	27.1305	27.4014	26.7941	26.0989	27.105	26.8207	26.4772	26.926	27.0625	26.2755	26.6415	26.2777	26.7848	27.0404	26.6366	27.77	27.2153	26.4015	23.2394	26.3611	27.359	26.9879
	P62910	P62910	60S ribosomal protein L32	1	RPL32	sp|P62910|RL32_HUMAN 60S ribosomal protein L32 OS=Homo sapiens OX=9606 GN=RPL32 PE=1 SV=2	27.515	26.9859	27.1882	25.8108	26.8943	26.0028	26.5599	27.1178	26.6424	26.0737	26.4111	26.9926	26.0581	26.7379	26.2619	26.219	26.0479	26.14	27.7761	28.1976	27.2934	28.3398	28.4117	28.0035	27.463	27.4888	26.9702	26.6886	26.04	27.0507	27.1556	26.8641	26.6885	26.429	26.7427	26.3689	25.8484	25.8603	26.2089	25.5937	25.555	25.8992	25.0701
	Q96HS1	Q96HS1	Serine/threonine-protein phosphatase PGAM5, mitochondrial	1	PGAM5	sp|Q96HS1|PGAM5_HUMAN Serine/threonine-protein phosphatase PGAM5, mitochondrial OS=Homo sapiens OX=9606 GN=PGAM5 PE=1 SV=2	27.508	27.4222	27.4371	27.543	27.4214	27.2911	27.5065	28.0386	27.7039	27.1063	27.2219	27.5223	28.3316	27.8274	27.7143	28.1616	28.4616	28.4047	27.0462	27.1468	27.2411	27.3665	27.3963	27.2687	27.3297	26.9243	27.6106	27.3641	27.7235	27.5303	27.6073	27.5694	27.4442	28.1833	28.0432	28.3452	27.3093	27.5771	27.4425	27.5608	27.4544	27.3983	28.1444
	P61254	P61254	60S ribosomal protein L26	1	RPL26	sp|P61254|RL26_HUMAN 60S ribosomal protein L26 OS=Homo sapiens OX=9606 GN=RPL26 PE=1 SV=1	27.5058	27.7791	27.4798	27.4307	27.819	27.6034	26.7626	27.0177	26.6147	26.8792	27.4724	28.5203	27.0839	27.5901	27.4338	27.0431	27.046	26.479	28.3733	27.7216	28.2409	28.0556	28.3479	28.923	28.3094	28.337	29.5283	28.8181	28.6038	28.1409	28.0133	28.0862	28.6186	27.0254	27.5346	27.5707	27.1472	27.7023	26.0443	27.3541	27.7408	28.5225	26.0922
	P14618	P14618	Pyruvate kinase PKM	2	PKM	sp|P14618|KPYM_HUMAN Pyruvate kinase PKM OS=Homo sapiens OX=9606 GN=PKM PE=1 SV=4	27.5031	27.3678	27.1782	27.2684	27.2421	27.001	27.5162	27.0059	27.4062	26.91	26.8158	27.1829	26.8242	27.8702	26.6672	26.1931	27.0445	27.1539	27.293	26.8674	27.9174	27.7304	26.9539	27.2668	26.5417	28.9127	26.6189	27.0537	26.7661	27.103	26.7192	26.7813	27.0139	27.2391	27.43	27.03	27.4421	26.2776	27.3856	27.36	27.2741	27.3163	26.8928
	P04637	P04637	Cellular tumor antigen p53	1	TP53	sp|P04637|P53_HUMAN Cellular tumor antigen p53 OS=Homo sapiens OX=9606 GN=TP53 PE=1 SV=4	27.4828	27.6501	27.9096	27.5276	27.4097	27.4506	27.3774	26.5832	27.2733	27.1616	27.4799	27.2941	26.9941	26.756	26.9266	26.8061	26.7489	26.7844	26.8223	26.2822	26.4067	26.4674	26.6303	26.3633	27.6335	26.4342	26.8315	26.6192	26.1468	26.401	27.3904	27.192	27.521	26.8387	26.8077	26.4499	27.7573	26.8834	27.2796	27.3054	27.3903	27.9139	27.1237
	P62701	P62701	40S ribosomal protein S4, X isoform	3	RPS4X	sp|P62701|RS4X_HUMAN 40S ribosomal protein S4, X isoform OS=Homo sapiens OX=9606 GN=RPS4X PE=1 SV=2	27.4814	27.1665	27.2224	27.8902	28.0541	27.7988	27.6037	28.4238	28.0096	28.2128	28.1401	27.8162	28.3845	27.8151	27.5798	27.6521	27.8658	27.993	28.1545	28.545	28.3924	28.5262	28.4951	27.8772	28.2015	28.238	27.9508	27.7165	28.1996	27.9348	28.1592	28.0829	27.8275	28.0973	27.8609	28.4102	27.4312	27.8678	28.0699	27.8116	27.914	26.0459	28.2392
	O76021	O76021	Ribosomal L1 domain-containing protein 1	1	RSL1D1	sp|O76021|RL1D1_HUMAN Ribosomal L1 domain-containing protein 1 OS=Homo sapiens OX=9606 GN=RSL1D1 PE=1 SV=3	27.4664	26.2755	26.6179	25.3095	26.4249	25.9673	26.1447	26.5782	25.8699	24.6528	25.0788	25.831	26.3426	26.6802	27.3388	26.9075	26.4543	26.2697	27.5497	27.1335	26.8238	27.4812	27.6366	26.3943	26.5631	26.3783	26.7535	26.4921	25.7624	26.3047	26.6777	27.0683	26.8558	26.4045	26.2853	26.0309	25.3812	26.4945	26.252	24.8011	25.5894	25.8977	25.8328
	Q9NYF8	Q9NYF8	Bcl-2-associated transcription factor 1	1	BCLAF1	sp|Q9NYF8|BCLF1_HUMAN Bcl-2-associated transcription factor 1 OS=Homo sapiens OX=9606 GN=BCLAF1 PE=1 SV=2	27.4513	27.134	27.0769	27.5933	27.688	27.8061	26.9175	27.4127	26.9349	27.4097	27.5237	27.994	27.6425	27.5161	27.6605	28.3589	28.095	28.0405	27.1331	27.0908	26.8357	27.0541	27.3283	26.9136	28.2692	26.991	27.6918	27.7974	27.9189	28.0111	28.1087	28.1424	28.0815	30.7524	30.6935	30.898	26.5247	27.212	27.0481	27.7172	27.8955	27.7786	28.0766
	P62314	P62314	Small nuclear ribonucleoprotein Sm D1	1	SNRPD1	sp|P62314|SMD1_HUMAN Small nuclear ribonucleoprotein Sm D1 OS=Homo sapiens OX=9606 GN=SNRPD1 PE=1 SV=1	27.4325	26.1378	26.4215	23.9687	24.3314	25.0767	25.8101	26.1707	26.0326	23.8991	25.4276	24.6975	25.5867	26.569	26.2586	26.5616	26.1204	26.5645	27.671	27.4488	27.2358	26.4155	26.2005	24.8492	25.211	25.649	24.9091	25.3123	25.488	26.0758	25.8817	25.9267	25.6834	25.8411	27.1507	26.8385	25.073	25.7953	26.0732	23.9029	24.2928	22.3497	25.7843
	P61313	P61313	60S ribosomal protein L15	1	RPL15	sp|P61313|RL15_HUMAN 60S ribosomal protein L15 OS=Homo sapiens OX=9606 GN=RPL15 PE=1 SV=2	27.4186	26.9431	26.7073	27.0855	27.3214	26.4274	25.5539	25.9092	25.0379	25.5999	26.2321	27.1278	25.7287	26.0557	26.3342	25.8822	25.3907	25.4176	27.9409	26.8648	26.1926	27.2298	28.1125	27.2439	27.6703	27.8056	27.8554	26.0034	25.4953	25.9764	27.4401	27.9032	27.6	26.5723	27.4644	27.2164	25.4302	25.7959	25.5138	26.5103	26.3947	28.4749	24.9402
	P62424	P62424	60S ribosomal protein L7a	1	RPL7A	sp|P62424|RL7A_HUMAN 60S ribosomal protein L7a OS=Homo sapiens OX=9606 GN=RPL7A PE=1 SV=2	27.4159	27.0668	27.107	26.808	27.3895	26.9375	27.2386	27.3903	27.0978	26.8723	26.9204	27.6964	26.6706	27.0716	26.8873	27.5988	26.2694	26.5933	28.0758	28.1058	27.1733	28.6164	28.5786	28.1084	27.8034	27.9877	27.4107	26.6564	26.2805	26.9344	27.5818	27.7185	27.2484	26.5156	26.8371	26.6517	26.3782	26.6155	27.3941	26.2962	26.7876	27.0555	25.372
	P62937	P62937	Peptidyl-prolyl cis-trans isomerase A;Peptidyl-prolyl cis-trans isomerase A, N-terminally processed	7	PPIA	sp|P62937|PPIA_HUMAN Peptidyl-prolyl cis-trans isomerase A OS=Homo sapiens OX=9606 GN=PPIA PE=1 SV=2	27.4111	26.7489	26.8697	26.938	26.9998	26.6164	27.1642	27.1306	26.7745	26.5241	26.4102	26.6454	26.9451	28.1432	26.7323	26.7497	27.4561	27.4911	26.8669	26.8927	27.3671	28.127	27.1053	26.7869	26.1738	28.5778	26.0593	27.0747	27.2557	26.9294	26.4901	26.4272	26.2376	27.2483	27.5168	27.1805	26.5777	26.1528	27.0031	26.7378	26.1663	25.9028	26.7446
	P55084	P55084	Trifunctional enzyme subunit beta, mitochondrial;3-ketoacyl-CoA thiolase	1	HADHB	sp|P55084|ECHB_HUMAN Trifunctional enzyme subunit beta, mitochondrial OS=Homo sapiens OX=9606 GN=HADHB PE=1 SV=3	27.4101	26.9753	26.7788	26.6091	26.6044	26.9419	27.8369	27.4702	27.7533	27.583	27.0189	28.0214	29.0091	27.9265	27.3588	27.6747	28.4075	28.2492	25.9711	28.1681	27.3945	27.9519	28.143	27.0654	26.804	28.1132	27.805	27.4661	28.2648	27.5327	27.6854	25.5649	25.3503	27.1654	27.6082	28.0586	27.2484	27.3494	28.3395	27.4909	26.9781	25.4894	27.64
	P62308	P62308;A8MWD9	Small nuclear ribonucleoprotein G;Putative small nuclear ribonucleoprotein G-like protein 15	2	SNRPG	sp|P62308|RUXG_HUMAN Small nuclear ribonucleoprotein G OS=Homo sapiens OX=9606 GN=SNRPG PE=1 SV=1;sp|A8MWD9|RUXGL_HUMAN Putative small nuclear ribonucleoprotein G-like protein 15 OS=Homo sapiens OX=9606 GN=SNRPGP15 PE=5 SV=2	27.4086	26.636	26.8389	26.7036	26.2372	25.2223	27.0186	27.715	26.6277	27.0114	25.7219	25.084	27.3628	26.7372	26.4208	27.6041	27.0169	26.7475	27.9632	28.2795	28.1888	26.4484	26.6227	25.3851	27.0471	25.8982	26.4723	26.8458	27.5941	27.1338	26.9455	27.1898	27.056	28.0388	27.5003	27.6034	25.6369	26.5296	26.4558	26.4065	25.6926	25.3651	26.6527
	P62979	P62979;P0CG47;P0CG48	Ubiquitin-40S ribosomal protein S27a;Ubiquitin;40S ribosomal protein S27a;Polyubiquitin-B;Ubiquitin;Polyubiquitin-C;Ubiquitin	3	RPS27A	sp|P62979|RS27A_HUMAN Ubiquitin-40S ribosomal protein S27a OS=Homo sapiens OX=9606 GN=RPS27A PE=1 SV=2;sp|P0CG47|UBB_HUMAN Polyubiquitin-B OS=Homo sapiens OX=9606 GN=UBB PE=1 SV=1;sp|P0CG48|UBC_HUMAN Polyubiquitin-C OS=Homo sapiens OX=9606 GN=UBC PE=1 SV=3	27.4067	26.9654	27.1726	27.5452	27.23	27.3927	27.2078	27.0817	27.2373	27.4541	27.0787	27.2638	26.9867	27.1503	27.2996	27.2243	26.6561	26.6335	27.2679	26.9364	27.1087	27.0399	27.2886	27.067	27.6551	27.7181	27.2865	27.0812	26.5869	26.877	27.7644	27.1686	27.3354	27.5447	27.8489	28.23	26.9508	27.2065	27.2149	27.1867	27.2814	28.4304	26.8251
	Q8IYS1	Q8IYS1	Peptidase M20 domain-containing protein 2	1	PM20D2	sp|Q8IYS1|P20D2_HUMAN Peptidase M20 domain-containing protein 2 OS=Homo sapiens OX=9606 GN=PM20D2 PE=1 SV=2	27.4019	28.4276	27.6075	27.2708	27.4699	27.2855	27.4478	28.0887	27.661	27.7025	28.3846	27.3733	29.4264	29.1898	28.6694	27.9338	28.2514	28.2057	27.1867	27.5801	27.5254	27.655	27.6573	27.3118	27.2884	27.2649	27.6331	27.5897	27.1582	27.6836	27.5765	27.3579	27.427	27.6686	27.4051	27.8121	27.372	27.9884	27.5163	27.315	27.2948	26.8831	28.0207
	Q2Q1W2	Q2Q1W2	E3 ubiquitin-protein ligase TRIM71	1	TRIM71	sp|Q2Q1W2|LIN41_HUMAN E3 ubiquitin-protein ligase TRIM71 OS=Homo sapiens OX=9606 GN=TRIM71 PE=1 SV=1	27.3941	24.6608	24.0358	25.5807	26.067	25.5923	24.5537	25.3996	24.573	23.7035	25.5845	25.7618	24.8859	25.3551	25.4507	24.5448	25.9317	25.9573	25.5202	25.0901	25.6416	25.4245	26.2089	25.6683	25.32	25.9358	25.9234	25.0893	25.4204	24.6276	28.0982	28.3287	28.3517	28.7997	26.5322	26.6058	24.5376	25.1085	23.7238	24.4238	27.8063	26.0298	24.2869
	P40429	P40429	60S ribosomal protein L13a	2	RPL13A	sp|P40429|RL13A_HUMAN 60S ribosomal protein L13a OS=Homo sapiens OX=9606 GN=RPL13A PE=1 SV=2	27.3629	26.9111	26.9858	26.0673	26.7283	26.529	26.9747	27.0156	26.5278	25.7154	26.3888	26.6824	25.9214	27.2723	26.0386	25.5389	26.15	26.2564	28.1672	27.7441	27.2788	28.0561	28.1168	27.1494	27.2532	27.7259	26.5889	25.942	26.0096	26.6317	27.5068	27.401	27.2457	26.2564	26.8629	26.5172	25.6011	25.7674	26.7693	26.4456	26.1386	25.9697	24.7854
	P18124	P18124	60S ribosomal protein L7	1	RPL7	sp|P18124|RL7_HUMAN 60S ribosomal protein L7 OS=Homo sapiens OX=9606 GN=RPL7 PE=1 SV=1	27.3478	27.3639	27.3418	27.078	27.5403	27.2331	27.1353	27.3222	27.0038	27.2485	27.5576	28.1646	26.9318	27.371	26.9527	26.5952	26.5742	26.2465	28.2729	28.2027	28.0097	28.7816	28.7504	28.7675	28.0572	28.2154	28.3376	26.9593	26.7089	27.0562	27.6791	27.8621	27.6136	26.5779	27.1941	27.1141	26.8649	26.9819	26.9189	27.3215	26.9734	27.4253	25.8886
	Q92973	Q92973	Transportin-1	1	TNPO1	sp|Q92973|TNPO1_HUMAN Transportin-1 OS=Homo sapiens OX=9606 GN=TNPO1 PE=1 SV=2	27.3452	27.7246	26.5578	26.9075	27.333	27.3819	28.5003	27.624	29.0811	29.014	28.3751	26.8507	28.0144	28.103	27.536	26.7314	26.9439	27.382	26.9352	28.0954	26.6384	28.3975	27.7434	26.9493	26.4761	27.2541	25.6837	27.9859	28.527	28.5717	27.0839	27.5075	25.9698	27.1661	25.7119	26.2466	26.7019	26.9293	29.1524	25.8174	27.4888	26.356	28.0564
	Q96C19	Q96C19	EF-hand domain-containing protein D2	1	EFHD2	sp|Q96C19|EFHD2_HUMAN EF-hand domain-containing protein D2 OS=Homo sapiens OX=9606 GN=EFHD2 PE=1 SV=1	27.3387	27.4522	27.7208	28.1752	27.6419	28.3112	27.8621	26.8572	27.6796	27.8522	27.8605	27.5288	26.2628	25.5179	26.3585	27.0922	26.1819	26.2782	26.9946	27.029	26.5074	26.1485	26.109	26.2497	28.2942	26.7764	26.0818	26.891	26.3267	27.0824	27.9285	27.6466	27.8428	26.534	26.4325	26.0907	27.7791	25.8336	27.8702	27.7201	27.623	27.9538	27.0041
	Q15366	Q15366	Poly(rC)-binding protein 2	2	PCBP2	sp|Q15366|PCBP2_HUMAN Poly(rC)-binding protein 2 OS=Homo sapiens OX=9606 GN=PCBP2 PE=1 SV=1	27.3365	27.2466	27.3379	26.9873	27.2303	26.994	27.1016	28.0381	27.0742	27.712	27.4725	26.6476	28.4251	27.9655	27.5413	27.6002	28.2507	28.2435	27.2088	27.691	27.2129	28.0771	28.0378	27.1851	26.8291	26.8395	27.5475	26.7589	28.0721	27.587	27.398	27.045	27.3132	27.3466	27.7572	28.0725	26.9196	27.7462	27.0385	26.9823	27.1208	24.5884	28.3803
	Q02543	Q02543	60S ribosomal protein L18a	1	RPL18A	sp|Q02543|RL18A_HUMAN 60S ribosomal protein L18a OS=Homo sapiens OX=9606 GN=RPL18A PE=1 SV=2	27.3364	27.2631	27.0372	26.6087	26.9745	26.6249	27.0093	26.8448	26.6129	25.5843	26.1553	27.3761	25.7023	26.9589	26.0469	26.1348	25.961	26.1457	27.9633	27.6544	27.1594	28.2377	28.1507	27.9224	27.5749	27.2829	27.7694	26.5988	26.0031	27.0923	26.889	27.0862	26.9834	26.1397	26.6745	26.3822	26.463	26.241	26.7016	26.2778	26.3778	26.5421	25.032
	P50914	P50914	60S ribosomal protein L14	1	RPL14	sp|P50914|RL14_HUMAN 60S ribosomal protein L14 OS=Homo sapiens OX=9606 GN=RPL14 PE=1 SV=4	27.3264	26.6122	26.2716	24.7697	26.3864	24.5723	26.0697	25.3538	26.5687	24.2257	25.1826	25.2954	24.9717	25.979	24.8998	26.4214	24.4913	25.1228	27.0031	26.3039	26.705	27.1032	26.4161	25.491	26.1308	27.0799	23.359	25.8519	24.8398	26.2328	26.1641	26.2744	25.7264	24.3215	24.8753	25.2643	25.073	25.2688	25.9279	23.4386	23.7746	24.9257	24.4213
	P62847	P62847	40S ribosomal protein S24	1	RPS24	sp|P62847|RS24_HUMAN 40S ribosomal protein S24 OS=Homo sapiens OX=9606 GN=RPS24 PE=1 SV=1	27.3146	26.7643	26.7626	26.3916	26.846	26.6171	27.0437	27.5417	27.0436	25.4247	25.8723	26.8363	26.0704	27.1281	26.8925	26.7662	26.3905	26.7189	28.9109	28.8314	28.5204	28.7615	28.9442	28.1929	26.8198	27.1327	26.9695	27.4253	26.4301	27.5582	26.7836	27.1752	26.9355	25.873	26.7409	26.366	26.0753	26.433	27.0822	25.3416	25.4492	25.5134	25.7057
	Q13242	Q13242	Serine/arginine-rich splicing factor 9	1	SRSF9	sp|Q13242|SRSF9_HUMAN Serine/arginine-rich splicing factor 9 OS=Homo sapiens OX=9606 GN=SRSF9 PE=1 SV=1	27.299	27.0395	27.2046	27.116	27.1335	26.9307	26.9639	27.8185	27.1025	27.3562	27.3547	27.147	28.1065	27.9396	27.9522	27.8709	28.1743	28.107	27.0673	27.2121	26.8557	27.521	27.8527	27.4617	27.673	27.0107	27.8649	28.612	28.9186	28.1783	27.7344	27.82	27.4183	28.8622	29.0045	29.2845	26.9808	28.0144	27.0696	27.6236	27.1549	27.8168	28.1534
	Q4VCS5	Q4VCS5	Angiomotin	1	AMOT	sp|Q4VCS5|AMOT_HUMAN Angiomotin OS=Homo sapiens OX=9606 GN=AMOT PE=1 SV=1	27.2966	27.6007	27.8209	28.3725	28.1244	28.2422	28.1097	27.1344	28.1314	27.8985	28.0853	28.1633	26.494	26.6196	27.1612	26.8164	26.7266	26.8967	27.277	27.1859	27.2291	27.3096	27.322	27.0555	27.5198	26.4338	25.6906	27.5277	27.1204	27.5396	27.5953	27.7331	27.9633	26.7017	26.7478	26.5329	28.1749	26.7844	28.1301	27.8966	28.122	28.0371	27.4225
	P22392	P22392;O60361	Nucleoside diphosphate kinase B;Putative nucleoside diphosphate kinase	2	NME2	sp|P22392|NDKB_HUMAN Nucleoside diphosphate kinase B OS=Homo sapiens OX=9606 GN=NME2 PE=1 SV=1;sp|O60361|NDK8_HUMAN Putative nucleoside diphosphate kinase OS=Homo sapiens OX=9606 GN=NME2P1 PE=5 SV=1	27.2954	27.3531	27.0753	27.0717	27.2728	26.5216	26.6455	26.8655	27.3799	26.2041	26.7288	27.1794	26.8304	27.879	26.151	27.2091	27.1331	26.8731	26.5297	26.472	27.2194	27.0412	26.5825	27.1486	26.9326	27.8604	27.2402	27.0532	26.9929	27.1533	27.178	26.4654	26.7532	27.3074	27.9966	28.1014	26.8561	26.2966	27.6972	26.9013	26.8578	26.8466	26.6393
	P17096	P17096	High mobility group protein HMG-I/HMG-Y	1	HMGA1	sp|P17096|HMGA1_HUMAN High mobility group protein HMG-I/HMG-Y OS=Homo sapiens OX=9606 GN=HMGA1 PE=1 SV=3	27.2897	26.9435	26.9545	26.0262	27.3888	25.8913	25.508	25.9044	25.2758	22.5011	25.3764	25.6871	25.9657	27.3164	25.8561	26.9004	26.8316	26.9387	26.882	25.3376	25.4994	25.9819	27.1011	23.8201	25.1457	25.8697	27.5002	27.3913	25.8971	27.079	26.1546	27.4328	26.8882	25.8542	26.8674	26.5516	26.632	27.6911	26.6995	24.316	26.0624	28.0443	26.3445
	P00558	P00558	Phosphoglycerate kinase 1	1	PGK1	sp|P00558|PGK1_HUMAN Phosphoglycerate kinase 1 OS=Homo sapiens OX=9606 GN=PGK1 PE=1 SV=3	27.2552	26.9442	26.7066	26.1539	27.1135	26.2172	26.7793	26.6144	26.9567	26.6939	26.2729	26.4662	26.3713	27.42	26.1876	26.8985	26.6148	26.9045	26.3298	26.0262	27.0049	27.4664	26.5329	26.6512	25.6406	29.3486	25.7931	26.4179	26.7919	26.3404	26.4261	25.8812	25.0674	27.4025	27.3247	26.9191	26.5251	25.6579	26.9987	26.0459	26.4466	26.5888	24.6165
	Q69YQ0	Q69YQ0	Cytospin-A	1	SPECC1L	sp|Q69YQ0|CYTSA_HUMAN Cytospin-A OS=Homo sapiens OX=9606 GN=SPECC1L PE=1 SV=2	27.25	27.3207	27.4328	27.6991	27.2367	27.5483	27.75	26.5144	27.7596	27.0204	27.5108	26.9957	25.9847	25.5218	26.5561	26.7292	26.1321	26.1622	26.5688	26.7129	26.4926	26.143	26.204	26.1496	27.4857	26.0207	24.7555	26.6209	25.9498	26.77	27.4481	27.5002	27.4902	26.1033	25.6658	25.0264	27.572	25.2692	27.6674	27.1108	27.4921	27.6072	26.7719
	P30044	P30044	Peroxiredoxin-5, mitochondrial	1	PRDX5	sp|P30044|PRDX5_HUMAN Peroxiredoxin-5, mitochondrial OS=Homo sapiens OX=9606 GN=PRDX5 PE=1 SV=4	27.248	24.4823	26.9664	25.8526	25.6505	26.4592	27.0659	26.8837	27.7722	24.3495	26.1832	26.8987	27.036	27.827	26.9438	27.6789	27.2939	27.3446	26.6631	26.0763	27.0025	28.3177	27.4307	25.7725	26.0361	28.1027	26.3743	26.8538	27.4668	26.81	26.0096	25.2109	26.7661	26.6886	26.4405	25.2353	27.2134	26.6199	27.8019	26.1983	26.1166	25.9128	27.076
	P42677	P42677	40S ribosomal protein S27	1	RPS27	sp|P42677|RS27_HUMAN 40S ribosomal protein S27 OS=Homo sapiens OX=9606 GN=RPS27 PE=1 SV=3	27.2458	27.4771	27.0614	27.5597	28.1954	28.2118	26.7077	26.4568	26.5211	27.6499	27.6602	27.6449	26.8002	26.7841	26.7836	26.3555	27.1635	26.965	27.5041	26.7982	27.0484	27.682	27.7247	28.0982	27.5933	27.6881	28.2218	26.8696	26.9557	26.601	27.4117	27.655	27.5101	28.0899	28.2381	28.3876	27.8719	28.0013	27.147	27.6647	27.7902	28.296	27.6424
	P62917	P62917	60S ribosomal protein L8	1	RPL8	sp|P62917|RL8_HUMAN 60S ribosomal protein L8 OS=Homo sapiens OX=9606 GN=RPL8 PE=1 SV=2	27.2397	27.7041	27.436	27.6846	28.0346	27.6448	26.8272	26.9001	26.5461	28.1032	28.3623	28.9711	26.8045	27.5243	27.1191	26.4404	26.361	26.1217	28.4375	28.1208	28.6791	28.3757	28.568	29.0884	28.6207	28.5899	29.3489	27.0813	26.8029	26.5403	27.5976	28.0747	27.8922	27.6479	27.743	27.5704	27.3037	27.4374	26.4637	27.6911	27.7776	28.1016	25.7995
	Q9H582	Q9H582	Zinc finger protein 644	1	ZNF644	sp|Q9H582|ZN644_HUMAN Zinc finger protein 644 OS=Homo sapiens OX=9606 GN=ZNF644 PE=1 SV=2	27.2335	26.6755	27.0936	23.1254	24.3388	23.7403	26.8167	27.2944	26.7615	24.3833	23.4504	24.4118	27.6809	26.905	26.9486	27.0953	27.4761	27.3157	26.6127	26.6207	26.8196	26.8276	26.9677	25.5742	24.8797	25.3222	25.9875	27.3256	27.6969	27.344	24.2067	24.5658	24.4262	22.183	24.6039	25.4341	25.429	26.4604	26.513	24.0765	24.11	24.7865	25.5387
	Q9H307	Q9H307	Pinin	1	PNN	sp|Q9H307|PININ_HUMAN Pinin OS=Homo sapiens OX=9606 GN=PNN PE=1 SV=5	27.2143	27.2447	27.1459	27.309	27.4009	27.1897	26.9888	27.0322	27.0181	27.435	27.9793	27.3827	28.2896	27.8656	27.7893	27.4576	27.3956	27.2553	26.9163	26.7974	26.2044	27.0904	27.3335	26.9523	27.6358	26.7962	27.9995	26.9152	26.9877	26.798	28.3048	27.8025	27.7505	28.0322	27.6591	27.845	26.9622	27.2066	27.1264	26.9574	27.3571	27.3876	27.8663
	P04406	P04406	Glyceraldehyde-3-phosphate dehydrogenase	1	GAPDH	sp|P04406|G3P_HUMAN Glyceraldehyde-3-phosphate dehydrogenase OS=Homo sapiens OX=9606 GN=GAPDH PE=1 SV=3	27.2014	26.9866	26.838	26.1951	27.0362	26.4854	26.9103	26.5779	27.6876	26.0359	26.6744	26.0095	26.1434	27.5679	26.1925	27.3184	26.7411	27.0544	26.5939	26.7246	27.4196	27.6053	26.9336	26.1911	25.6867	29.3759	26.8699	26.7086	26.8176	26.6779	25.9673	25.5986	25.8131	26.9372	26.7371	26.3654	26.746	24.6112	27.1097	26.2576	25.9583	25.6721	26.1567
	P47756	P47756	F-actin-capping protein subunit beta	1	CAPZB	sp|P47756|CAPZB_HUMAN F-actin-capping protein subunit beta OS=Homo sapiens OX=9606 GN=CAPZB PE=1 SV=4	27.1954	27.0858	27.3987	27.7982	27.8439	27.857	27.6417	26.7187	27.349	27.535	27.5743	26.7757	26.6518	25.9263	26.3404	27.0721	26.7316	26.5946	26.6217	26.8477	26.3353	26.6294	26.426	26.0324	27.331	26.5437	25.4823	27.1001	26.4472	27.1251	27.5593	27.4622	27.6846	26.3582	25.8982	26.0553	27.3922	25.7725	27.6335	27.5169	27.5352	26.0781	26.9495
	P38919	P38919	Eukaryotic initiation factor 4A-III;Eukaryotic initiation factor 4A-III, N-terminally processed	1	EIF4A3	sp|P38919|IF4A3_HUMAN Eukaryotic initiation factor 4A-III OS=Homo sapiens OX=9606 GN=EIF4A3 PE=1 SV=4	27.1857	26.9576	26.9924	27.1991	27.6119	27.1591	26.7888	27.5138	27.0158	27.2852	27.2872	27.0008	27.8422	27.3125	27.6099	28.6192	28.8051	29.1524	26.9439	26.6803	26.6891	26.9684	27.4227	27.1898	27.0301	26.9251	27.3423	28.2763	28.5879	28.4106	27.9591	27.3422	27.2855	28.0182	28.1992	28.501	26.8066	27.2779	27.1979	27.3307	27.143	27.9191	28.2569
	P46779	P46779	60S ribosomal protein L28	1	RPL28	sp|P46779|RL28_HUMAN 60S ribosomal protein L28 OS=Homo sapiens OX=9606 GN=RPL28 PE=1 SV=3	27.1846	27.2962	26.8113	26.5523	27.1057	26.7331	26.8909	26.3929	26.4652	26.1186	27.2874	27.457	25.2994	26.5703	25.9356	25.6	25.7228	25.7776	27.9459	27.3523	27.6351	27.6385	27.6748	28.0635	27.4664	27.3438	27.9159	26.4559	25.924	26.8623	26.8153	27.137	27.4044	26.0841	26.8721	26.3565	26.2074	25.8866	26.1903	25.8453	26.3831	27.9857	24.7589
	Q15287	Q15287	RNA-binding protein with serine-rich domain 1	1	RNPS1	sp|Q15287|RNPS1_HUMAN RNA-binding protein with serine-rich domain 1 OS=Homo sapiens OX=9606 GN=RNPS1 PE=1 SV=1	27.1766	26.9008	26.9047	25.9614	26.0873	25.9733	26.8796	26.5205	26.7507	25.5044	25.8137	25.7455	27.4143	27.1492	27.4921	26.8681	26.8436	27.0796	26.687	26.4346	26.5175	26.2883	26.7546	26.751	25.5841	25.7176	25.7474	26.5703	26.7497	26.4511	25.8203	26.2758	26.1031	26.5134	26.4701	26.6632	26.6772	27.0678	26.7205	25.3781	25.938	25.6815	27.4817
	P16989	P16989	Y-box-binding protein 3	1	YBX3	sp|P16989|YBOX3_HUMAN Y-box-binding protein 3 OS=Homo sapiens OX=9606 GN=YBX3 PE=1 SV=4	27.1738	27.3484	27.2068	26.5088	26.824	26.5244	27.127	27.5659	26.6599	26.0882	26.7212	26.5715	28.1246	27.8822	27.3371	27.9019	27.7581	27.3946	27.4344	27.3298	27.7941	27.6724	27.563	27.8755	27.1504	26.5988	27.804	27.3778	27.526	26.9054	26.8916	26.8033	26.8597	26.6393	27.2783	27.5587	26.9609	27.8	26.3877	26.8507	26.8298	26.3286	27.2759
	P29372	P29372	DNA-3-methyladenine glycosylase	1	MPG	sp|P29372|3MG_HUMAN DNA-3-methyladenine glycosylase OS=Homo sapiens OX=9606 GN=MPG PE=1 SV=3	27.1479	27.0343	27.1781	26.1483	26.3255	26.2139	26.7344	27.4614	26.886	26.9014	26.6417	26.6476	27.7445	27.2745	27.0881	27.2209	27.646	27.737	26.932	27.07	27.1124	26.9788	27.1527	26.822	26.5835	26.5624	27.413	26.8498	27.3888	27.171	26.8181	26.4164	26.3524	26.4517	27.0059	27.3893	26.8112	27.5884	26.8367	26.5596	26.3094	26.4961	26.9687
	Q99460	Q99460	26S proteasome non-ATPase regulatory subunit 1	1	PSMD1	sp|Q99460|PSMD1_HUMAN 26S proteasome non-ATPase regulatory subunit 1 OS=Homo sapiens OX=9606 GN=PSMD1 PE=1 SV=2	27.1454	26.8123	26.8231	27.8924	28.0883	27.4779	27.1828	26.7881	27.6129	27.3948	27.2499	25.9176	25.6829	26.0728	26.3972	26.7772	26.0535	25.9643	26.8623	26.487	27.4657	26.1315	26.668	26.0409	26.4287	28.1342	22.5187	26.6341	26.0834	27.6347	26.342	27.2341	26.7874	26.5797	27.9176	27.5815	27.8336	26.7149	27.8513	27.3012	27.7141	25.4393	27.0134
	P06733	P06733	Alpha-enolase	1	ENO1	sp|P06733|ENOA_HUMAN Alpha-enolase OS=Homo sapiens OX=9606 GN=ENO1 PE=1 SV=2	27.1414	26.8809	26.3414	26.7272	27.1431	26.34	26.7148	26.6088	26.5109	26.5224	26.3868	26.3019	26.8369	27.8191	26.2289	26.2087	26.9035	26.8424	26.4147	26.1141	27.1835	27.4921	26.5217	26.7677	26.1254	28.6522	26.3739	26.6595	26.8006	26.5948	26.605	25.9585	25.8619	27.1799	27.5003	27.3556	26.3733	25.7204	26.7712	26.6733	26.6763	25.8705	26.0309
	P07814	P07814	Bifunctional glutamate/proline--tRNA ligase;Glutamate--tRNA ligase;Proline--tRNA ligase	1	EPRS	sp|P07814|SYEP_HUMAN Bifunctional glutamate/proline--tRNA ligase OS=Homo sapiens OX=9606 GN=EPRS PE=1 SV=5	27.1327	27.1328	27.1811	27.6424	27.2837	27.3326	27.5334	26.8333	27.4311	26.9002	27.13	27.0197	26.646	26.9841	26.7374	26.8852	26.7632	26.9318	27.1099	26.9631	27.0636	26.7804	26.5483	26.824	27.1179	27.0007	26.2964	27.0589	26.9007	27.3225	27.2627	27.0997	27.305	26.8156	27.0922	26.759	27.571	26.3612	27.7089	27.0416	27.2867	27.3938	27.2685
	P62269	P62269	40S ribosomal protein S18	1	RPS18	sp|P62269|RS18_HUMAN 40S ribosomal protein S18 OS=Homo sapiens OX=9606 GN=RPS18 PE=1 SV=3	27.1094	26.8356	26.8538	27.0355	27.0852	26.8844	27.1092	27.8142	27.2134	27.3506	27.4039	26.6339	27.7129	27.2928	26.9141	27.1038	27.4439	27.4104	27.3079	27.6577	27.6722	27.6876	27.6709	27.2687	27.1006	27.6901	26.9684	27.2794	27.5523	27.1616	27.428	27.0376	27.0558	27.2633	27.2293	27.6553	26.7208	27.2905	27.486	27.2599	27.169	25.5424	27.2464
	P33993	P33993	DNA replication licensing factor MCM7	1	MCM7	sp|P33993|MCM7_HUMAN DNA replication licensing factor MCM7 OS=Homo sapiens OX=9606 GN=MCM7 PE=1 SV=4	27.0883	27.1108	27.0474	27.161	27.1814	27.1821	26.7007	26.8261	26.7719	26.6909	26.8221	26.9205	26.305	26.5501	26.3555	26.9781	27.0322	27.0411	26.721	26.2428	27.0902	26.6418	26.7266	26.7149	26.5577	26.0676	26.369	27.0535	27.0715	27.1896	26.1145	26.3188	26.824	26.6653	26.4489	26.8477	27.2232	27.1186	26.9156	26.7066	26.7669	27.5224	26.8855
	P46782	P46782	40S ribosomal protein S5;40S ribosomal protein S5, N-terminally processed	1	RPS5	sp|P46782|RS5_HUMAN 40S ribosomal protein S5 OS=Homo sapiens OX=9606 GN=RPS5 PE=1 SV=4	27.0818	26.4869	26.6911	27.0231	27.5584	27.4467	27.0361	27.5795	27.1423	27.4223	27.2541	26.6476	26.9113	26.9463	26.6395	26.672	27.141	27.0958	27.1598	27.5476	27.4489	27.7238	27.6986	26.9028	27.3887	27.5136	27.3914	27.1998	27.8289	27.3613	26.8696	26.7807	26.9133	27.2917	27.0123	27.0623	26.5108	26.5536	26.9865	26.9476	27.3016	26.279	26.9474
	Q15233	Q15233	Non-POU domain-containing octamer-binding protein	1	NONO	sp|Q15233|NONO_HUMAN Non-POU domain-containing octamer-binding protein OS=Homo sapiens OX=9606 GN=NONO PE=1 SV=4	27.0774	27.3313	27.1512	27.4537	27.539	27.5921	26.5043	27.2618	26.5553	27.0985	27.4348	27.8425	27.464	27.5763	26.898	26.8658	27.4116	27.2539	27.2648	26.8546	27.345	27.1276	26.8955	27.3958	27.6195	27.8073	28.6097	27.2885	27.4398	26.9542	27.6082	27.4748	27.6391	27.6706	27.6168	27.8149	26.8525	27.2555	26.8329	27.4231	27.5831	28.2728	26.8769
	O14974	O14974	Protein phosphatase 1 regulatory subunit 12A	1	PPP1R12A	sp|O14974|MYPT1_HUMAN Protein phosphatase 1 regulatory subunit 12A OS=Homo sapiens OX=9606 GN=PPP1R12A PE=1 SV=1	27.0655	27.427	27.4081	27.8742	27.2907	27.6487	27.4713	26.4167	27.4162	27.1058	27.3246	27.3603	25.8383	25.4164	26.1106	26.3877	26.2368	26.0392	26.7549	26.3656	26.4615	25.8281	26.0114	26.2685	27.5218	26.0555	25.7681	26.6006	25.9655	26.8142	27.6721	27.4689	27.7963	25.8358	25.9684	25.2511	27.5231	25.6595	27.5787	27.3649	27.6232	27.8956	26.4273
	P13639	P13639	Elongation factor 2	1	EEF2	sp|P13639|EF2_HUMAN Elongation factor 2 OS=Homo sapiens OX=9606 GN=EEF2 PE=1 SV=4	27.0654	27.0222	26.7231	27.0164	27.1162	26.759	26.9326	26.8067	26.9728	26.6893	26.8434	26.869	26.7024	27.3522	26.4235	26.3341	26.8114	26.7107	26.6576	26.7065	27.188	27.3841	26.9393	27.1065	26.4714	28.3217	26.5239	27.2444	27.2998	27.2684	26.5274	26.2845	26.3092	26.9937	27.1638	27.104	26.9031	26.5419	27.0692	26.6528	26.4485	27.048	26.9182
	Q6WCQ1	Q6WCQ1	Myosin phosphatase Rho-interacting protein	1	MPRIP	sp|Q6WCQ1|MPRIP_HUMAN Myosin phosphatase Rho-interacting protein OS=Homo sapiens OX=9606 GN=MPRIP PE=1 SV=3	27.0645	27.2458	27.3646	27.5784	27.1371	27.4478	27.6332	26.4513	27.6086	26.7933	27.1596	26.875	25.7557	25.0765	26.2153	26.7468	26.3199	26.1432	26.8254	26.5253	26.5444	26.1935	26.2746	26.3	26.8469	25.9009	24.8616	26.5855	25.9957	26.6911	27.211	27.0118	27.3743	25.7966	25.5595	24.9375	27.6277	25.3428	27.6206	27.3544	27.2395	27.2938	26.6211
	O43175	O43175	D-3-phosphoglycerate dehydrogenase	1	PHGDH	sp|O43175|SERA_HUMAN D-3-phosphoglycerate dehydrogenase OS=Homo sapiens OX=9606 GN=PHGDH PE=1 SV=4	27.059	27.0967	27.0678	27.4993	27.5606	27.292	27.3557	26.8751	26.9393	26.9929	27.2387	27.3154	26.8132	27.3471	26.8476	27.06	27.2848	27.0424	27.0842	26.7879	27.1721	27.1538	26.7132	26.756	26.7524	27.1958	27.1561	28.8946	29.3954	29.0582	27.2414	27.0954	27.3404	27.1286	27.2565	27.0692	27.2872	26.7933	27.1299	27.0915	27.3549	27.1861	26.9508
	Q00577	Q00577	Transcriptional activator protein Pur-alpha	1	PURA	sp|Q00577|PURA_HUMAN Transcriptional activator protein Pur-alpha OS=Homo sapiens OX=9606 GN=PURA PE=1 SV=2	27.0554	26.9434	26.9726	27.1322	27.4063	27.3699	26.9282	27.5402	27.1032	27.2911	27.0631	26.6921	27.5782	27.1209	27.0061	27.7987	27.3304	27.4684	26.7743	27.3444	27.3877	27.1454	27.1429	27.034	27.4142	27.6173	27.7854	26.7532	27.0707	26.8516	27.3055	27.1438	27.6029	27.5926	27.3315	27.5157	26.7035	27.0287	27.2028	27.2401	26.968	25.7806	26.9927
	O60506	O60506	Heterogeneous nuclear ribonucleoprotein Q	1	SYNCRIP	sp|O60506|HNRPQ_HUMAN Heterogeneous nuclear ribonucleoprotein Q OS=Homo sapiens OX=9606 GN=SYNCRIP PE=1 SV=2	27.0457	26.6305	26.5948	26.4958	26.7982	26.4792	27.2456	28.0036	27.4615	26.9256	27.0322	26.5734	28.0014	27.6122	27.526	27.8318	27.4985	27.6398	26.7862	27.1409	27.0805	27.1556	27.4239	26.8203	26.7489	26.8488	27.2184	27.4161	27.8769	27.6944	27.4999	27.2861	26.9555	27.346	27.2964	27.555	26.478	27.365	27.2422	26.2592	26.6211	26.6262	27.5694
	Q92841	Q92841	Probable ATP-dependent RNA helicase DDX17	1	DDX17	sp|Q92841|DDX17_HUMAN Probable ATP-dependent RNA helicase DDX17 OS=Homo sapiens OX=9606 GN=DDX17 PE=1 SV=2	27.0368	26.8483	26.9444	26.6082	26.5789	26.2989	30.8919	31.9369	30.8832	26.8802	26.7275	26.6611	27.4739	27.3654	27.3661	27.9726	27.8627	27.942	27.2491	27.3704	27.4891	27.3393	27.5134	27.2163	26.8897	26.1197	27.4267	28.5384	29.0465	28.6791	27.0665	26.8833	26.8417	27.3274	27.8893	28.0774	26.866	27.3912	27.0646	26.8741	26.7041	26.7992	27.4647
	P62913	P62913	60S ribosomal protein L11	1	RPL11	sp|P62913|RL11_HUMAN 60S ribosomal protein L11 OS=Homo sapiens OX=9606 GN=RPL11 PE=1 SV=2	27.0359	26.9371	26.9865	28.0389	28.3445	28.3129	27.1095	27.6709	26.8755	27.9261	27.965	28.3874	27.9096	27.2834	27.2247	27.224	27.1733	27.2257	27.6631	27.5385	27.6118	28.2941	28.2632	28.3092	28.7661	28.5042	28.9669	27.6427	27.8366	27.5694	28.7259	28.2682	28.5022	28.7243	28.3661	28.7257	26.8025	27.3938	26.963	27.944	27.812	27.8579	27.1621
	P05204	P05204	Non-histone chromosomal protein HMG-17	1	HMGN2	sp|P05204|HMGN2_HUMAN Non-histone chromosomal protein HMG-17 OS=Homo sapiens OX=9606 GN=HMGN2 PE=1 SV=3	27.0279	26.0838	25.5959	26.5529	27.2717	26.4293	23.5321	24.3789	23.2264	24.365	23.6381	26.1478	23.183	25.4251	25.2575	25.6295	26.3714	25.9631	26.4146	24.0776	24.5515	25.4181	25.4221	24.189	26.1645	27.6964	26.4681	26.2926	24.2496	24.2296	26.492	27.5321	26.3584	25.3455	27.3037	26.9991	23.8304	26.5336	23.8461	23.6434	25.5136	27.7015	23.2434
	P22087	P22087	rRNA 2-O-methyltransferase fibrillarin	1	FBL	sp|P22087|FBRL_HUMAN rRNA 2-O-methyltransferase fibrillarin OS=Homo sapiens OX=9606 GN=FBL PE=1 SV=2	27.0265	26.2393	26.2367	25.8527	26.6172	26.1657	25.6918	25.7229	25.8813	25.6271	26.1955	26.4559	26.0534	26.3869	27.7422	26.6857	26.3149	26.4522	26.8992	26.4299	26.7849	27.1613	27.5427	27.1415	26.5548	26.4494	26.8634	26.8392	26.549	26.3517	26.1474	26.9002	26.2313	26.208	25.8393	25.7434	26.2742	26.9246	26.4386	24.9625	25.718	26.619	26.9248
	P81605	P81605	Dermcidin;Survival-promoting peptide;DCD-1	1	DCD	sp|P81605|DCD_HUMAN Dermcidin OS=Homo sapiens OX=9606 GN=DCD PE=1 SV=2	27.0261	26.3344	26.718	27.5082	27.5887	28.2718	26.7326	27.7486	26.9076	26.6326	26.9345	26.2293	27.2438	27.5654	27.6346	27.2034	26.9672	26.9362	27.6552	27.7448	26.1494	27.1689	27.0407	24.8608	28.0006	27.0544	27.5661	26.6203	27.1529	26.1224	27.93	25.9797	26.3913	26.0273	26.7993	27.0085	25.6433	27.4666	26.4169	26.1199	24.8693	24.7395	25.792
	Q13310	Q13310	Polyadenylate-binding protein 4	1	PABPC4	sp|Q13310|PABP4_HUMAN Polyadenylate-binding protein 4 OS=Homo sapiens OX=9606 GN=PABPC4 PE=1 SV=1	27.0226	27.0167	27.0276	27.0332	26.7145	26.5662	27.3387	28.0695	27.3458	26.6628	26.6432	26.8636	26.8926	27.0377	26.6406	29.2913	30.0668	29.9851	26.3652	26.6218	26.3622	26.5216	26.5896	25.8982	26.7509	25.8441	26.5855	27.9088	28.0621	28.0871	27.3887	27.0453	27.4111	27.8833	28.3959	28.4626	26.458	26.668	26.5489	27.1738	27.0828	26.2672	26.9039
	Q14126	Q14126	Desmoglein-2	1	DSG2	sp|Q14126|DSG2_HUMAN Desmoglein-2 OS=Homo sapiens OX=9606 GN=DSG2 PE=1 SV=2	27.0131	27.1264	27.127	26.8313	26.7515	27.0281	27.4277	26.2131	27.3808	26.6722	26.6517	26.7305	25.8228	25.6498	26.7068	26.5945	25.9537	26.0779	26.4097	26.0044	26.0491	26.0383	26.1986	25.9504	26.8932	25.8727	24.9481	26.9547	26.3199	27.0148	26.3318	26.5861	26.9558	25.5449	25.8866	25.0746	27.4444	24.8389	27.2529	26.6026	26.7986	26.9106	26.9197
	P63173	P63173	60S ribosomal protein L38	1	RPL38	sp|P63173|RL38_HUMAN 60S ribosomal protein L38 OS=Homo sapiens OX=9606 GN=RPL38 PE=1 SV=2	26.9943	26.6136	26.8926	25.7543	25.7431	26.2576	26.7083	26.6239	27.3461	26.1553	26.2458	25.8135	26.7388	26.7748	27.0941	25.7295	26.8563	27.3275	27.3127	27.4867	27.5246	28.0837	28.307	27.4223	25.9787	26.3	25.9438	27.4352	27.0491	27.6118	26.1738	26.0115	25.618	26.6651	26.9324	26.4529	27.1933	26.6523	27.4367	25.8979	25.9764	23.895	27.8287
	Q8TDY2	Q8TDY2	RB1-inducible coiled-coil protein 1	1	RB1CC1	sp|Q8TDY2|RBCC1_HUMAN RB1-inducible coiled-coil protein 1 OS=Homo sapiens OX=9606 GN=RB1CC1 PE=1 SV=3	26.9941	26.8603	27.02	25.8902	27.1291	26.8885	26.7769	26.9877	26.3692	27.6753	23.7412	27.0005	27.1361	27.116	26.686	26.4677	27.016	26.817	26.7536	26.6301	26.921	26.5666	22.5458	25.3234	28.3939	28.8269	27.2723	26.8857	26.9053	26.9196	27.2491	28.0099	27.2648	27.775	29.1378	29.3837	26.7212	26.7647	27.2008	28.2692	26.18	26.0237	26.9064
	Q9Y4I1	Q9Y4I1	Unconventional myosin-Va	1	MYO5A	sp|Q9Y4I1|MYO5A_HUMAN Unconventional myosin-Va OS=Homo sapiens OX=9606 GN=MYO5A PE=1 SV=2	26.9862	27.1561	27.3386	27.3138	26.9344	27.3714	27.5225	26.3026	27.5184	26.7429	27.1056	26.7744	25.4491	25.2051	25.9333	26.5891	26.0659	26.2544	26.5709	26.5303	26.3757	25.9621	25.99	26.0051	26.9376	25.9824	24.8104	26.389	25.8853	26.4797	27.0529	26.9733	27.327	25.4432	25.5717	24.7218	27.4667	24.7467	27.4809	27.2364	27.5899	26.6897	26.5761
	Q9UHX1	Q9UHX1	Poly(U)-binding-splicing factor PUF60	1	PUF60	sp|Q9UHX1|PUF60_HUMAN Poly(U)-binding-splicing factor PUF60 OS=Homo sapiens OX=9606 GN=PUF60 PE=1 SV=1	26.9821	26.5839	26.4521	26.8598	26.6276	26.5993	26.9321	27.718	27.1729	26.8401	26.4974	25.8691	27.3891	27.1894	26.9283	27.2963	27.1136	27.4048	26.597	27.4153	27.156	27.3189	27.1544	26.8234	26.4868	26.0097	26.4147	26.8606	27.0862	27.289	26.672	26.6974	26.2161	26.6014	26.3479	26.9736	26.3851	27.038	27.2042	26.2426	26.3849	24.8002	26.9991
	P62316	P62316	Small nuclear ribonucleoprotein Sm D2	1	SNRPD2	sp|P62316|SMD2_HUMAN Small nuclear ribonucleoprotein Sm D2 OS=Homo sapiens OX=9606 GN=SNRPD2 PE=1 SV=1	26.9769	26.5833	26.4487	26.018	26.1873	26.3388	26.4065	26.8425	26.6276	26.2888	26.705	26.0183	26.5789	26.2526	26.554	27.1517	26.5176	26.8457	27.6806	27.8173	27.9867	26.1338	26.2596	25.7967	25.9601	25.9353	25.7101	27.0105	27.0448	26.6308	25.9137	26.5482	26.0208	27.0151	27.0528	27.0103	26.4157	26.8108	26.6555	26.125	26.0707	24.5949	26.5111
	Q13813	Q13813	Spectrin alpha chain, non-erythrocytic 1	1	SPTAN1	sp|Q13813|SPTN1_HUMAN Spectrin alpha chain, non-erythrocytic 1 OS=Homo sapiens OX=9606 GN=SPTAN1 PE=1 SV=3	26.9687	26.9752	27.1521	27.4491	27.1045	27.398	27.3267	26.3045	27.2147	27.0041	27.2509	26.9986	26.0681	25.8577	26.5191	26.4973	26.2899	26.3142	26.4545	26.5541	26.3654	26.3005	26.2338	25.8657	27.1558	26.4738	24.8378	26.5723	26.1132	26.6263	26.9787	27.1629	27.1808	26.1912	26.1151	25.6862	27.3033	25.2326	27.2918	27.2281	27.2474	26.1623	26.7954
	P35251	P35251	Replication factor C subunit 1	1	RFC1	sp|P35251|RFC1_HUMAN Replication factor C subunit 1 OS=Homo sapiens OX=9606 GN=RFC1 PE=1 SV=4	26.9661	26.9999	26.8494	26.7927	27.1346	26.8482	26.4328	27.0888	26.6446	27.4402	27.3037	27.2715	27.4441	27.3002	27.0428	27.2654	27.3633	27.4758	27.0107	27.3023	27.2525	27.0741	27.3438	27.1918	27.4425	26.526	27.5849	26.9111	27.2876	27.0129	27.144	27.1551	27.1453	27.4045	27.3568	27.5949	26.5261	27.4804	26.7872	26.6509	26.9824	28.0268	27.3937
	Q52LJ0	Q52LJ0	Protein FAM98B	1	FAM98B	sp|Q52LJ0|FA98B_HUMAN Protein FAM98B OS=Homo sapiens OX=9606 GN=FAM98B PE=1 SV=1	26.9536	27.0011	26.9394	23.7882	23.677	23.5417	24.5685	25.6963	24.9593	24.1813	23.8743	23.4879	24.8636	24.5332	24.2268	24.0398	25.2403	25.0545	23.9232	24.4808	23.8531	24.4618	24.2952	24.0117	24.4435	23.4909	23.7009	25.0324	25.4421	25.0515	24.4768	23.9934	23.7366	24.0418	24.4725	24.6443	23.5613	24.0562	24.7778	23.9273	23.7661	23.8219	27.4323
	O43390	O43390	Heterogeneous nuclear ribonucleoprotein R	1	HNRNPR	sp|O43390|HNRPR_HUMAN Heterogeneous nuclear ribonucleoprotein R OS=Homo sapiens OX=9606 GN=HNRNPR PE=1 SV=1	26.9409	26.5724	26.5598	26.5748	26.6425	26.388	27.023	27.5813	27.3008	26.9715	27.0283	26.2021	27.8446	27.3201	27.5392	27.7923	27.4776	27.7008	26.6331	26.9666	26.9652	26.8877	27.1621	26.5048	26.3571	26.5012	27.0801	27.2441	27.6363	27.4781	27.0066	27.2083	26.6826	27.2804	26.7837	26.8347	26.2367	27.0533	27.1795	26.0949	26.54	27.3792	27.5905
	O43765	O43765	Small glutamine-rich tetratricopeptide repeat-containing protein alpha	1	SGTA	sp|O43765|SGTA_HUMAN Small glutamine-rich tetratricopeptide repeat-containing protein alpha OS=Homo sapiens OX=9606 GN=SGTA PE=1 SV=1	26.9393	27.2157	26.2122	27.8398	26.9631	19.8993	26.0246	19.6484	26.544	31.9238	27.5003	27.1533	20.1837	26.6621	26.0936	17.9301	29.5347	27.1043	27.1049	26.6198	27.0802	26.5289	26.9056	26.6337	27.0076	20.1327	26.2688	28.2906	29.8304	27.5866	27.2786	27.1222	27.3786	27.1954	27.9029	26.917	30.6525	26.1482	30.2249	27.793	27.7859	29.2347	27.4484
	Q15365	Q15365	Poly(rC)-binding protein 1	2	PCBP1	sp|Q15365|PCBP1_HUMAN Poly(rC)-binding protein 1 OS=Homo sapiens OX=9606 GN=PCBP1 PE=1 SV=2	26.928	26.7402	26.8485	26.6047	26.6442	26.399	26.9753	27.399	26.6971	26.9671	26.6087	26.6326	27.4273	27.4522	27.0153	27.2372	27.491	27.3444	26.9615	27.1047	27.1327	27.3572	27.4731	27.4933	26.8385	27.2392	27.0943	27.3895	27.646	27.616	26.6302	26.614	26.497	26.6584	27.2623	27.5595	26.987	27.6103	26.7992	26.7749	26.8185	26.7551	27.5177
	P49368	P49368	T-complex protein 1 subunit gamma	1	CCT3	sp|P49368|TCPG_HUMAN T-complex protein 1 subunit gamma OS=Homo sapiens OX=9606 GN=CCT3 PE=1 SV=4	26.9278	26.9118	26.7864	27.0664	27.1886	27.1587	27.1672	26.556	27.0656	26.7286	26.9866	26.8513	26.2707	26.9926	26.6006	26.7131	26.6235	26.6975	26.8276	26.7253	26.8437	26.8434	26.4885	26.2306	26.5493	26.6406	26.3758	27.1279	26.9877	27.3383	26.969	26.6595	26.8312	26.7172	27.1437	26.7239	27.3323	26.5644	27.2753	26.9786	27.0784	27.2603	26.7674
	Q15717	Q15717	ELAV-like protein 1	1	ELAVL1	sp|Q15717|ELAV1_HUMAN ELAV-like protein 1 OS=Homo sapiens OX=9606 GN=ELAVL1 PE=1 SV=2	26.924	26.7363	26.652	26.6334	26.9638	26.6598	26.5072	27.6112	26.5338	26.7179	26.5238	26.8145	27.4674	27.3667	27.6691	27.9976	27.6711	27.7547	26.6726	26.3005	26.3375	26.5475	27.1096	26.9245	26.9132	26.2296	27.6101	27.3198	27.3746	26.9693	26.8782	27.3249	27.1228	27.4068	27.5458	27.8426	26.6858	27.402	26.446	26.8425	26.7819	27.3413	27.4146
	P47914	P47914	60S ribosomal protein L29	1	RPL29	sp|P47914|RL29_HUMAN 60S ribosomal protein L29 OS=Homo sapiens OX=9606 GN=RPL29 PE=1 SV=2	26.9196	27.3116	26.3425	25.1433	27.3993	25.8032	26.2875	26.0624	25.9231	25.511	25.991	27.6722	27.1787	26.7651	25.6861	25.9741	26.1297	25.5451	27.5103	26.6305	26.9853	27.303	26.6514	27.527	27.2971	27.7002	28.0401	26.1153	25.8428	26.6153	26.8023	26.7314	27.0028	25.7697	26.3526	26.715	25.953	26.8544	25.729	25.0531	26.7303	28.3806	25.2917
	P10599	P10599	Thioredoxin	1	TXN	sp|P10599|THIO_HUMAN Thioredoxin OS=Homo sapiens OX=9606 GN=TXN PE=1 SV=3	26.9146	27.0914	26.7532	27.0728	27.0186	26.604	26.7925	26.6479	26.4856	27.6292	26.98	27.0055	26.7313	27.0344	26.7977	26.679	26.849	26.9221	26.5895	26.4867	26.6006	27.6971	27.626	27.9903	26.8286	28.418	27.001	26.7509	27.1645	26.6963	27.4848	26.9558	27.0224	27.1794	26.6281	26.4534	27.0334	26.7803	26.9866	26.9195	26.8429	27.2458	26.8631
	P05388	P05388;Q8NHW5	60S acidic ribosomal protein P0;60S acidic ribosomal protein P0-like	2	RPLP0	sp|P05388|RLA0_HUMAN 60S acidic ribosomal protein P0 OS=Homo sapiens OX=9606 GN=RPLP0 PE=1 SV=1;sp|Q8NHW5|RLA0L_HUMAN 60S acidic ribosomal protein P0-like OS=Homo sapiens OX=9606 GN=RPLP0P6 PE=5 SV=1	26.9021	27.0613	26.8932	26.8185	27.2672	27.1305	27.651	27.9265	27.5894	27.9316	27.6085	27.5415	26.9824	26.7709	26.4698	28.0922	26.1897	26.6285	27.7289	28.3608	28.152	28.3998	27.9719	27.7754	27.2528	27.6006	27.0665	26.9156	27.0871	27.3438	26.4982	26.7907	26.3396	26.2961	25.9544	25.7613	26.4465	26.5155	27.1111	26.9809	26.2635	24.9345	25.9587
	Q8IV63	Q8IV63	Inactive serine/threonine-protein kinase VRK3	1	VRK3	sp|Q8IV63|VRK3_HUMAN Inactive serine/threonine-protein kinase VRK3 OS=Homo sapiens OX=9606 GN=VRK3 PE=1 SV=2	26.9001	26.8165	26.8489	25.6688	25.7817	25.7347	25.8449	26.5594	25.9953	27.1603	26.8802	26.8303	26.3769	26.4272	26.2405	26.4957	26.7997	26.7605	25.8509	26.1779	26.1232	25.5399	25.7231	25.5344	26.6316	26.0667	26.9961	24.9987	25.4676	25.14	26.5909	26.6867	26.5188	25.5379	25.4926	25.8038	26.2083	27.189	26.3575	26.2717	26.429	25.3445	25.4531
	P25705	P25705	ATP synthase subunit alpha, mitochondrial	1	ATP5A1	sp|P25705|ATPA_HUMAN ATP synthase subunit alpha, mitochondrial OS=Homo sapiens OX=9606 GN=ATP5F1A PE=1 SV=1	26.8961	26.7183	26.545	26.551	26.6305	26.3235	26.6012	26.3806	26.2993	26.1127	26.2954	26.3961	26.4317	27.4823	26.6508	26.5587	26.9182	26.7867	26.7004	26.3441	27.157	27.19	26.5169	26.6955	25.9705	27.1258	26.2013	26.5901	26.6077	26.5179	26.0414	26.0478	25.9029	26.5975	26.9486	27.2115	26.711	26.4978	26.5747	26.5372	26.2618	25.7254	26.7391
	P63241	P63241;Q6IS14	Eukaryotic translation initiation factor 5A-1;Eukaryotic translation initiation factor 5A-1-like	2	EIF5A	sp|P63241|IF5A1_HUMAN Eukaryotic translation initiation factor 5A-1 OS=Homo sapiens OX=9606 GN=EIF5A PE=1 SV=2;sp|Q6IS14|IF5AL_HUMAN Eukaryotic translation initiation factor 5A-1-like OS=Homo sapiens OX=9606 GN=EIF5AL1 PE=2 SV=2	26.8881	26.6671	26.7268	26.6277	27.7264	26.868	27.2023	27.4595	27.0362	28.1661	27.4807	26.9426	27.3073	27.3213	26.498	27.333	27.3816	27.3376	26.4217	27.0371	27.141	27.9535	27.6644	27.2541	26.7828	28.0355	26.8465	27.3042	27.7549	27.5638	27.4809	26.9538	26.9431	27.7398	27.7657	27.9279	26.0407	26.3046	27.051	26.8744	27.2803	26.6384	27.0943
	P09012	P09012	U1 small nuclear ribonucleoprotein A	1	SNRPA	sp|P09012|SNRPA_HUMAN U1 small nuclear ribonucleoprotein A OS=Homo sapiens OX=9606 GN=SNRPA PE=1 SV=3	26.8818	26.7031	26.7874	26.8318	27.1299	27.0604	26.4625	27.3174	26.4794	26.1599	26.7086	27.016	26.4476	26.7075	26.323	26.3289	26.7981	26.6269	26.6248	26.6738	27.0385	26.474	26.5127	26.3229	26.6119	26.8798	27.2273	26.8027	27.2913	26.6849	26.512	26.9684	27.0003	26.4069	26.6344	26.5717	26.6054	27.2015	26.4754	26.8977	26.5894	26.7811	26.0683
	P78527	P78527	DNA-dependent protein kinase catalytic subunit	1	PRKDC	sp|P78527|PRKDC_HUMAN DNA-dependent protein kinase catalytic subunit OS=Homo sapiens OX=9606 GN=PRKDC PE=1 SV=3	26.8758	26.7988	26.971	26.9105	26.8436	26.9103	27.0019	27.0819	27.1114	26.9714	27.013	26.8059	27.3039	27.1241	26.8939	27.0364	26.9797	27.2118	26.5876	26.8676	26.7979	26.6792	26.6546	26.492	26.7669	26.405	26.627	26.9692	27.1321	27.2485	27.0599	26.8023	26.7353	26.7888	26.6996	26.8946	27.1247	27.1974	27.3353	26.9258	26.9663	26.867	26.8356
	Q9UQ35	Q9UQ35	Serine/arginine repetitive matrix protein 2	1	SRRM2	sp|Q9UQ35|SRRM2_HUMAN Serine/arginine repetitive matrix protein 2 OS=Homo sapiens OX=9606 GN=SRRM2 PE=1 SV=2	26.87	27.0792	26.9426	26.9204	26.9425	26.8796	27.0089	27.2612	26.9191	26.282	26.4238	26.7718	27.0379	26.9413	26.8053	27.401	27.8028	27.6019	26.6167	26.3891	26.385	26.5023	26.4623	26.6039	27.1156	26.3159	27.0352	26.5915	26.8942	26.6112	27.0906	26.9129	26.933	27.5889	27.7517	28.0282	26.5293	26.7402	26.4609	26.3562	26.7465	27.6207	27.1445
	O60508	O60508	Pre-mRNA-processing factor 17	1	CDC40	sp|O60508|PRP17_HUMAN Pre-mRNA-processing factor 17 OS=Homo sapiens OX=9606 GN=CDC40 PE=1 SV=1	26.8693	26.1771	25.7308	25.5882	25.319	25.5264	24.9206	26.6583	25.544	25.7483	25.3754	25.189	26.8236	26.9141	27.7884	26.7218	26.3685	26.6887	24.4202	25.7462	26.6574	25.7504	26.7464	19.9765	25.113	24.6804	26.2803	26.7558	26.4016	26.042	25.1485	26.5909	25.1367	28.5297	28.6769	29.4246	26.5925	26.8669	25.3931	26.3134	25.5415	26.954	26.3842
	P46776	P46776	60S ribosomal protein L27a	1	RPL27A	sp|P46776|RL27A_HUMAN 60S ribosomal protein L27a OS=Homo sapiens OX=9606 GN=RPL27A PE=1 SV=2	26.862	25.8514	26.1913	26.0655	26.2488	26.3278	27.1169	27.1681	27.1562	26.0336	26.745	25.8292	26.2666	26.6907	26.7376	26.3688	26.3055	26.6217	27.7799	28.1428	27.2709	28.3878	28.3128	27.0498	26.4138	26.8886	25.7435	26.9012	26.8648	27.3152	27.0089	27.3436	26.4759	26.2212	26.6023	26.5224	25.8181	25.6285	27.0337	25.7491	26.0176	23.5417	25.6513
	Q5T200	Q5T200	Zinc finger CCCH domain-containing protein 13	1	ZC3H13	sp|Q5T200|ZC3HD_HUMAN Zinc finger CCCH domain-containing protein 13 OS=Homo sapiens OX=9606 GN=ZC3H13 PE=1 SV=1	26.8559	25.3351	27.4904	27.9808	26.2665	25.1117	28.3594	25.8468	27.9989	26.1065	24.9881	26.2694	27.9037	27.1322	26.9364	28.7359	27.2477	27.1772	25.2302	25.9567	27.9447	26.6468	26.3185	24.2008	25.8656	25.4859	26.2681	27.2712	26.8798	26.1342	27.0961	27.0493	25.5959	26.8777	30.4151	31.3388	24.5773	26.598	28.6965	27.8872	26.0023	25.8765	26.4919
	Q14674	Q14674	Separin	1	ESPL1	sp|Q14674|ESPL1_HUMAN Separin OS=Homo sapiens OX=9606 GN=ESPL1 PE=1 SV=3	26.8471	26.4903	26.2039	26.5628	26.552	26.3477	25.8277	26.841	26.0897	26.0133	26.5187	27.0645	26.2266	26.3763	27.1713	26.0082	27.0152	27.3623	26.3717	26.292	26.4217	26.5464	26.3433	26.606	26.4012	26.5104	26.1722	26.1832	26.5736	27.0736	25.6208	26.2488	26.8471	26.6404	25.5777	26.5096	26.7096	26.9839	26.2409	26.3816	27.3011	24.8819	26.5599
	P52597	P52597	Heterogeneous nuclear ribonucleoprotein F;Heterogeneous nuclear ribonucleoprotein F, N-terminally processed	1	HNRNPF	sp|P52597|HNRPF_HUMAN Heterogeneous nuclear ribonucleoprotein F OS=Homo sapiens OX=9606 GN=HNRNPF PE=1 SV=3	26.844	26.3993	26.5526	25.9301	26.47	26.023	27.0712	27.7046	26.7394	27.3449	26.879	26.5377	27.1348	26.8455	26.8642	27.282	27.341	27.3619	27.1451	27.6152	27.6402	27.1787	27.4652	27.1443	26.5337	26.5155	26.9428	27.3508	27.8671	27.4294	26.7561	26.8853	26.4982	26.7511	26.3601	26.5073	26.4021	27.0827	26.5756	26.3023	25.823	25.6791	26.8099
	P35221	P35221	Catenin alpha-1	1	CTNNA1	sp|P35221|CTNA1_HUMAN Catenin alpha-1 OS=Homo sapiens OX=9606 GN=CTNNA1 PE=1 SV=1	26.8422	26.493	26.9204	26.8086	27.007	27.1512	26.8933	25.8354	26.913	26.378	26.8962	26.4104	26.0581	26.0292	26.7846	26.6092	26.3416	26.5019	26.1994	24.5489	25.1292	26.1606	26.4458	25.671	26.3959	27.2136	26.0145	26.4736	25.9148	26.8089	26.2687	26.5145	26.6251	26.4154	26.3849	24.8357	26.9476	22.679	26.9389	26.6776	26.9258	26.1808	26.5248
	P38646	P38646	Stress-70 protein, mitochondrial	1	HSPA9	sp|P38646|GRP75_HUMAN Stress-70 protein, mitochondrial OS=Homo sapiens OX=9606 GN=HSPA9 PE=1 SV=2	26.8412	26.8476	26.9084	26.7466	26.6854	26.5351	26.7166	26.8236	26.7206	26.5901	26.5641	26.7008	26.979	27.2753	26.7892	27.2103	27.0486	27.0321	26.8059	26.9307	27.0479	26.9523	26.4117	26.5742	26.6321	26.5641	26.6701	26.6992	26.7932	26.8454	26.818	26.4409	26.8874	27.1189	27.2309	27.336	26.8294	26.7157	27.0732	26.5474	26.4413	26.6298	26.6147
	Q92614	Q92614	Unconventional myosin-XVIIIa	1	MYO18A	sp|Q92614|MY18A_HUMAN Unconventional myosin-XVIIIa OS=Homo sapiens OX=9606 GN=MYO18A PE=1 SV=3	26.8344	27.0743	27.0778	27.5996	27.2577	27.4634	27.407	26.5014	27.3382	27.0121	27.3622	27.0639	25.7682	24.8702	26.2164	26.298	26.0701	26.1012	26.4707	26.3677	26.2944	25.9159	26.0144	25.7599	27.2044	25.9543	25.5411	26.2349	25.5542	26.3758	26.9532	27.1545	27.2317	25.5205	25.5741	24.6628	27.3026	24.015	27.3487	27.2101	27.4691	27.106	26.3521
	Q7L2E3	Q7L2E3	Putative ATP-dependent RNA helicase DHX30	1	DHX30	sp|Q7L2E3|DHX30_HUMAN ATP-dependent RNA helicase DHX30 OS=Homo sapiens OX=9606 GN=DHX30 PE=1 SV=1	26.8317	26.5899	26.6906	26.5254	26.7915	26.5399	27.0776	27.8602	27.2115	27.423	27.3231	26.8655	27.4524	27.0873	26.9705	27.5036	27.1171	27.257	26.7345	27.2306	27.2281	27.3703	27.4043	26.7912	26.6335	26.4297	26.9698	27.6478	27.9981	27.9032	30.3833	30.145	29.9682	27.4023	27.3626	27.7056	26.378	27.1948	26.8167	26.9416	26.9014	26.7054	26.8048
	Q02878	Q02878	60S ribosomal protein L6	1	RPL6	sp|Q02878|RL6_HUMAN 60S ribosomal protein L6 OS=Homo sapiens OX=9606 GN=RPL6 PE=1 SV=3	26.8185	25.7095	25.8561	25.1295	25.324	25.4909	25.8135	25.5173	26.1598	24.9788	25.6105	26.1996	26.5088	26.5004	25.6795	26.1585	24.8271	25.6016	26.9606	26.8252	26.9428	26.8888	26.813	26.6742	26.2364	27.4633	26.2291	25.3731	25.569	26.1429	26.602	26.1904	25.6407	25.9501	25.6862	25.9702	24.8265	25.5822	25.9613	24.9474	25.1281	25.8634	25.2661
	Q9UKV3	Q9UKV3	Apoptotic chromatin condensation inducer in the nucleus	1	ACIN1	sp|Q9UKV3|ACINU_HUMAN Apoptotic chromatin condensation inducer in the nucleus OS=Homo sapiens OX=9606 GN=ACIN1 PE=1 SV=2	26.8159	26.6133	26.5835	26.296	26.5665	27.0605	26.2995	26.5963	26.5285	25.8538	26.1305	26.6245	26.856	26.8769	27.6589	26.9984	26.8503	27.0768	26.5124	26.1913	26.097	26.3966	26.6291	26.2224	26.5729	26.7929	26.8653	26.866	26.6475	26.3416	26.6959	27.0589	26.6524	27.1271	27.598	27.3061	26.3509	26.9694	26.4966	26.1757	26.6744	26.7042	27.6305
	P42766	P42766	60S ribosomal protein L35	1	RPL35	sp|P42766|RL35_HUMAN 60S ribosomal protein L35 OS=Homo sapiens OX=9606 GN=RPL35 PE=1 SV=2	26.8154	25.993	26.4644	26.5936	26.5497	26.8145	26.6729	27.199	26.6258	27.1683	27.152	26.9204	26.5855	26.8829	26.3785	27.6688	26.3611	26.4656	27.2209	27.7863	26.8983	27.9902	28.0212	27.1355	27.8281	27.5298	26.9401	27.0761	26.8124	27.2427	27.9268	27.575	27.3757	26.4776	26.5012	26.4223	25.4722	25.6317	26.8236	26.066	26.0351	27.7374	25.3548
	P49411	P49411	Elongation factor Tu, mitochondrial	1	TUFM	sp|P49411|EFTU_HUMAN Elongation factor Tu, mitochondrial OS=Homo sapiens OX=9606 GN=TUFM PE=1 SV=2	26.8096	26.6512	26.868	27.1311	27.1191	26.984	26.9554	27.1634	26.9797	27.1649	27.2669	26.9688	27.524	27.5683	27.0282	27.7407	27.7083	27.6716	26.8811	27.1289	27.1662	27.5709	27.5347	27.3538	27.2675	26.8156	27.0021	27.3285	27.6905	27.5774	27.2484	26.929	27.0939	27.9036	28.056	28.5085	27.1458	27.3623	27.4075	27.3343	27.1864	26.0321	28.4877
	P22061	P22061	Protein-L-isoaspartate(D-aspartate) O-methyltransferase	1	PCMT1	sp|P22061|PIMT_HUMAN Protein-L-isoaspartate(D-aspartate) O-methyltransferase OS=Homo sapiens OX=9606 GN=PCMT1 PE=1 SV=4	26.797	26.413	26.8096	26.4548	26.4613	26.5356	26.6812	26.9734	26.6079	26.8033	26.2972	26.3141	26.5952	26.8978	26.7945	26.8868	27.1094	27.1253	26.0221	26.6535	26.5323	26.8226	26.5898	26.1973	26.7728	26.5262	26.0873	26.9109	26.8515	26.7796	26.3779	26.2086	26.4787	27.0585	26.4029	26.4823	26.1732	26.914	26.5125	26.2337	26.3655	25.6084	26.7115
	Q71UI9	Q71UI9;P0C0S5	Histone H2A.V;Histone H2A.Z	2	H2AFV	sp|Q71UI9|H2AV_HUMAN Histone H2A.V OS=Homo sapiens OX=9606 GN=H2AFV PE=1 SV=3;sp|P0C0S5|H2AZ_HUMAN Histone H2A.Z OS=Homo sapiens OX=9606 GN=H2AFZ PE=1 SV=2	26.7964	21.4209	24.8575	26.2853	27.2647	26.2507	23.9003	25.5092	25.9601	26.3115	26.56	23.0291	27.0583	25.6818	27.7222	28.2275	26.4686	26.8479	25.4279	25.8118	25.2611	25.7633	27.2911	24.3314	25.304	23.5626	24.0216	26.7524	26.8565	26.5076	27.0803	27.4194	25.1919	26.4284	25.2148	24.4322	23.9016	26.5339	26.3016	25.9376	26.2588	27.4755	27.6808
	P62244	P62244	40S ribosomal protein S15a	1	RPS15A	sp|P62244|RS15A_HUMAN 40S ribosomal protein S15a OS=Homo sapiens OX=9606 GN=RPS15A PE=1 SV=2	26.7832	26.4439	26.6546	27.4168	27.4421	27.765	27.6399	27.5981	27.6268	27.6261	27.4994	27.0228	27.5101	26.8103	26.7788	27.4518	26.9526	27.5483	27.0593	27.6695	27.5976	27.9841	28.0802	27.174	27.5606	27.3525	27.0505	27.0154	27.8048	27.6869	27.6335	27.4491	27.2118	27.6089	27.6548	27.7255	27.0646	26.5737	27.5739	27.8595	27.5052	25.7672	27.9067
	O00161	O00161	Synaptosomal-associated protein 23	1	SNAP23	sp|O00161|SNP23_HUMAN Synaptosomal-associated protein 23 OS=Homo sapiens OX=9606 GN=SNAP23 PE=1 SV=1	26.7656	26.6779	27.0086	27.1153	26.7851	27.0177	26.9971	25.9266	27.2122	26.4173	27.1976	26.0437	25.4691	25.0583	26.0868	25.7943	25.7504	25.9624	26.2105	26.2003	25.9086	25.2757	25.5242	24.9918	26.4165	24.8042	24.5482	26.4528	25.8143	26.606	26.4103	26.622	26.5592	25.6777	24.6804	24.6504	27.1662	24.098	27.2538	26.8034	26.9418	26.4631	26.58
	P11021	P11021	78 kDa glucose-regulated protein	1	HSPA5	sp|P11021|BIP_HUMAN Endoplasmic reticulum chaperone BiP OS=Homo sapiens OX=9606 GN=HSPA5 PE=1 SV=2	26.765	26.7313	26.6428	26.6002	26.6162	26.5006	26.897	26.8373	26.727	26.2322	26.4634	26.6716	26.8457	27.1676	26.6944	26.9854	27.005	26.9391	26.543	26.4718	26.9409	27.0665	26.715	26.8782	26.6432	28.3057	26.7798	26.473	26.5333	26.6464	26.6287	26.603	26.6435	27.4103	27.616	27.7025	26.8389	26.5753	26.9091	26.6883	26.6615	26.1742	26.7439
	Q14498	Q14498	RNA-binding protein 39	1	RBM39	sp|Q14498|RBM39_HUMAN RNA-binding protein 39 OS=Homo sapiens OX=9606 GN=RBM39 PE=1 SV=2	26.7554	25.9509	26.2621	25.0047	26.0031	25.5759	26.3953	27.0786	26.5572	25.5857	25.4668	25.5752	26.3507	26.711	26.7975	26.8292	26.5843	26.5357	27.7091	27.751	27.7754	27.5722	27.5739	27.1042	26.1393	25.9424	25.8405	27.3107	27.287	27.4178	26.169	25.9398	25.7326	26.539	26.5677	26.6706	25.7477	26.1285	26.4702	25.4458	24.6112	25.704	27.0896
	P18077	P18077	60S ribosomal protein L35a	1	RPL35A	sp|P18077|RL35A_HUMAN 60S ribosomal protein L35a OS=Homo sapiens OX=9606 GN=RPL35A PE=1 SV=2	26.7542	26.9375	26.7093	26.7439	27.1759	26.6584	26.2281	26.8989	26.4601	27.5384	27.4632	28.0353	27.4408	27.3432	26.926	25.8643	26.2575	26.083	27.7517	27.5987	28.0485	27.9086	28.1052	28.6221	27.4719	27.6713	28.5453	26.4487	26.5372	26.7598	27.5582	27.5389	27.3664	26.6967	27.1418	27.3035	26.7672	27.4655	26.2164	27.3311	27.1339	28.0425	25.9463
	Q13185	Q13185	Chromobox protein homolog 3	1	CBX3	sp|Q13185|CBX3_HUMAN Chromobox protein homolog 3 OS=Homo sapiens OX=9606 GN=CBX3 PE=1 SV=4	26.7484	25.2013	25.7856	24.8918	25.223	24.8292	24.4252	25.0714	24.384	24.4674	24.2204	23.2492	25.5229	25.1579	27.1209	26.5699	26.2627	26.3996	25.7292	24.7362	24.4766	25.7907	26.7833	25.6264	24.2981	23.1885	24.6982	26.3705	25.5955	25.1912	25.2414	25.727	24.9686	25.6363	24.4195	23.9483	25.1335	26.7317	25.4454	24.8776	24.399	25.0299	27.1043
	Q3ZCM7	Q3ZCM7	Tubulin beta-8 chain	1	TUBB8	sp|Q3ZCM7|TBB8_HUMAN Tubulin beta-8 chain OS=Homo sapiens OX=9606 GN=TUBB8 PE=1 SV=2	26.7473	24.989	26.3144	27.3834	27.3253	28.148	28.2352	28.2495	26.7979	28.1261	27.3758	26.2941	27.2707	26.648	26.1656	27.7923	27.1981	28.3991	26.3156	28.1513	26.6638	28.2975	27.7851	25.5722	27.3568	27.1965	24.0317	27.0352	27.965	28.4977	27.4408	26.9498	26.3088	28.5913	28.4604	27.388	27.4984	27.397	28.8071	27.4773	27.3939	23.2493	28.5123
	P84098	P84098	60S ribosomal protein L19	1	RPL19	sp|P84098|RL19_HUMAN 60S ribosomal protein L19 OS=Homo sapiens OX=9606 GN=RPL19 PE=1 SV=1	26.7471	27.5405	27.073	27.6058	27.2611	27.0742	27.0045	27.0576	26.4587	26.081	26.4894	27.9178	26.529	26.7782	26.2321	26.6839	26.513	26.6375	28.1156	27.6134	27.6141	28.0591	27.8951	28.5159	28.1352	27.6931	28.7374	27.1179	26.9373	26.9002	27.5243	27.7098	27.9252	26.2281	27.01	26.546	26.6701	26.4603	26.4428	26.8516	26.6815	28.1113	25.0672
	Q9UGN5	Q9UGN5	Poly [ADP-ribose] polymerase 2	1	PARP2	sp|Q9UGN5|PARP2_HUMAN Poly [ADP-ribose] polymerase 2 OS=Homo sapiens OX=9606 GN=PARP2 PE=1 SV=2	26.7416	26.7001	26.6698	26.6227	26.7116	26.4944	26.4117	27.5361	26.6799	26.998	27.0239	26.832	27.6473	27.0367	26.5409	27.1296	27.2368	27.4209	26.1939	26.9545	26.5456	26.4544	26.5737	26.1822	26.7447	26.4675	27.4607	26.2261	26.8221	26.4072	27.2053	26.9037	26.8317	27.0901	27.158	27.2971	26.2287	27.199	26.6942	26.1396	26.5005	26.5004	26.469
	Q9NR30	Q9NR30	Nucleolar RNA helicase 2	1	DDX21	sp|Q9NR30|DDX21_HUMAN Nucleolar RNA helicase 2 OS=Homo sapiens OX=9606 GN=DDX21 PE=1 SV=5	26.7287	26.3777	26.2921	26.2291	26.5325	26.5232	26.0404	26.5792	26.055	26.9109	26.8127	26.8536	26.5969	26.872	27.1621	26.6603	26.2742	26.3654	27.1464	27.1684	27.3844	27.6495	27.7031	27.3662	27.2375	26.6693	27.2511	26.9963	27.036	26.8428	26.7724	26.9005	26.6686	26.3497	26.4869	26.6079	25.8901	26.3515	26.0272	26.0462	26.2451	26.0407	26.272
	P16220	P16220	Cyclic AMP-responsive element-binding protein 1	1	CREB1	sp|P16220|CREB1_HUMAN Cyclic AMP-responsive element-binding protein 1 OS=Homo sapiens OX=9606 GN=CREB1 PE=1 SV=2	26.7153	26.7269	26.8595	25.433	26.0509	24.9723	25.8457	26.6061	25.908	25.5409	25.3092	25.5277	27.7136	27.6191	27.521	27.3426	27.2423	27.3862	26.2374	26.0636	26.3389	25.9344	26.1926	26.4058	26.3444	26.0072	27.6404	26.2311	26.7676	26.1166	26.0773	26.3158	25.9431	25.5854	26.7484	26.5654	26.3614	27.2542	26.346	26.0981	25.1429	25.9255	26.8339
	Q9NRW3	Q9NRW3	DNA dC->dU-editing enzyme APOBEC-3C	1	APOBEC3C	sp|Q9NRW3|ABC3C_HUMAN DNA dC->dU-editing enzyme APOBEC-3C OS=Homo sapiens OX=9606 GN=APOBEC3C PE=1 SV=2	26.7065	25.9376	26.3429	25.3756	26.085	25.5348	27.1966	27.5153	27.1866	26.0114	26.2462	24.8139	27.1218	26.672	26.5631	26.6883	26.8808	27.2219	26.3256	26.7135	26.7588	26.5872	26.7411	25.9639	25.7508	24.9826	26.2609	26.4426	26.9459	27.3975	25.129	25.4138	24.6883	25.9277	26.4894	26.0077	25.9399	27.0072	26.6967	25.4471	25.3271	25.4184	26.7464
	Q9P258	Q9P258	Protein RCC2	1	RCC2	sp|Q9P258|RCC2_HUMAN Protein RCC2 OS=Homo sapiens OX=9606 GN=RCC2 PE=1 SV=2	26.7052	26.7694	26.6153	26.3854	26.6255	26.4843	26.6747	26.7489	26.521	26.9113	26.8399	26.9156	26.8086	26.8596	26.6388	26.5387	26.8757	26.873	26.6705	26.6546	26.9677	27.1074	27.1734	27.1841	27.0106	26.5095	27.0198	26.6502	26.9629	26.7334	26.855	26.6106	26.7269	26.702	26.7712	26.9326	26.5625	26.8342	26.6068	26.4011	26.487	26.2217	26.4906
	Q9Y608	Q9Y608	Leucine-rich repeat flightless-interacting protein 2	1	LRRFIP2	sp|Q9Y608|LRRF2_HUMAN Leucine-rich repeat flightless-interacting protein 2 OS=Homo sapiens OX=9606 GN=LRRFIP2 PE=1 SV=1	26.6967	26.9663	27.048	27.2814	27.0851	27.1052	27.2451	26.3617	27.3249	27.4066	27.2322	26.5222	25.6813	25.2501	26.3497	26.6074	25.9578	26.0297	26.3497	26.5173	26.0538	26.2678	26.2413	25.8515	27.3584	25.6685	25.5535	26.3591	25.7821	26.3369	27.3978	27.2244	27.6026	26.1599	25.4775	24.8048	27.1441	24.4254	27.5879	27.1456	27.2013	26.0316	26.4859
	P25398	P25398	40S ribosomal protein S12	1	RPS12	sp|P25398|RS12_HUMAN 40S ribosomal protein S12 OS=Homo sapiens OX=9606 GN=RPS12 PE=1 SV=3	26.6906	26.8014	26.9224	26.7776	26.732	26.8083	27.2228	27.6039	27.2258	27.1359	26.9306	26.8289	27.0469	26.9657	26.5352	26.9135	26.9859	27.0383	27.3618	27.7311	27.5665	28.2672	28.341	27.7957	27.1828	27.5583	26.971	27.0911	27.816	27.758	27.18	27.1274	26.9131	26.8474	27.007	27.008	26.7981	26.7787	26.6309	26.5184	26.5151	25.5335	26.5189
	Q13045	Q13045	Protein flightless-1 homolog	1	FLII	sp|Q13045|FLII_HUMAN Protein flightless-1 homolog OS=Homo sapiens OX=9606 GN=FLII PE=1 SV=2	26.6901	26.8796	26.881	27.2426	26.9451	27.4073	27.4594	26.2466	27.2714	26.7521	27.2154	26.8516	25.3521	25.4433	26.1173	26.2761	25.9449	25.8804	26.4936	26.4058	26.4227	25.9342	25.9703	25.9195	26.7642	25.8537	24.6594	26.245	25.8014	26.4067	26.8824	26.7133	26.7519	25.5142	25.4234	24.9391	27.2036	25.0705	27.2247	27.1933	27.2104	26.9866	26.2237
	P40227	P40227	T-complex protein 1 subunit zeta	1	CCT6A	sp|P40227|TCPZ_HUMAN T-complex protein 1 subunit zeta OS=Homo sapiens OX=9606 GN=CCT6A PE=1 SV=3	26.6839	26.3927	26.4742	27.3171	26.9096	27.0522	27.3026	26.4517	26.8998	26.6513	26.8638	26.3007	25.953	26.3955	26.4851	26.2751	26.3118	26.2757	26.5463	26.3079	26.5309	26.3005	25.9286	25.5907	26.1847	26.2655	25.5822	26.9743	26.5478	26.9776	26.8617	26.3576	26.7023	26.5145	26.176	26.1837	27.1386	25.9771	26.9715	26.8956	26.7858	26.3163	26.6251
	P06576	P06576	ATP synthase subunit beta, mitochondrial	1	ATP5B	sp|P06576|ATPB_HUMAN ATP synthase subunit beta, mitochondrial OS=Homo sapiens OX=9606 GN=ATP5F1B PE=1 SV=3	26.6827	26.6438	26.1917	25.7003	26.3378	25.5258	25.9193	25.7601	25.9893	25.4952	25.2954	25.7716	25.9101	27.2658	25.9848	25.6211	26.3836	26.2877	26.1228	25.7491	26.7622	26.8367	25.771	26.4025	25.012	27.0913	25.3728	26.2162	26.0985	26.0836	25.3887	25.3533	25.1843	26.4042	26.6082	26.2264	26.287	24.9724	26.2495	25.4046	25.3375	25.5417	25.7692
	Q9P0K7	Q9P0K7	Ankycorbin	2	RAI14	sp|Q9P0K7|RAI14_HUMAN Ankycorbin OS=Homo sapiens OX=9606 GN=RAI14 PE=1 SV=2	26.6804	26.7138	26.8701	27.6314	27.0684	27.4703	27.2321	26.2349	27.3753	27.0222	27.3782	26.8258	25.5497	25.0448	25.9103	26.4793	25.7515	26.0551	26.214	26.3231	25.9769	25.7966	25.7411	25.5442	27.0331	25.5714	25.1885	26.2885	25.8593	26.478	26.9243	27.2042	27.2215	25.9228	25.4949	24.7759	27.0456	24.914	27.3966	27.048	27.2477	26.0447	26.2973
	P07900	P07900	Heat shock protein HSP 90-alpha	3	HSP90AA1	sp|P07900|HS90A_HUMAN Heat shock protein HSP 90-alpha OS=Homo sapiens OX=9606 GN=HSP90AA1 PE=1 SV=5	26.6721	26.6381	26.505	26.9542	26.9214	27.0694	27.4663	26.8033	27.1899	26.9986	27.1826	26.0897	26.459	26.695	25.9223	26.823	26.4703	26.7186	26.4075	26.8001	26.6722	26.8655	26.3837	26.3241	26.5509	27.3525	25.1488	26.7279	26.5945	27.1114	26.8862	26.6902	26.7041	27.1185	26.676	26.7927	26.9943	25.544	27.5944	27.0561	27.0583	26.3326	26.7747
	Q8NI60	Q8NI60	Atypical kinase ADCK3, mitochondrial	1	ADCK3	sp|Q8NI60|COQ8A_HUMAN Atypical kinase COQ8A, mitochondrial OS=Homo sapiens OX=9606 GN=COQ8A PE=1 SV=1	26.6652	25.3121	26.766	25.4954	26.3546	26.1613	26.7849	26.0636	27.0532	26.1973	26.6502	26.7235	25.2759	26.307	26.3286	27.7104	26.2853	26.5869	26.4066	24.0172	27.0485	26.1365	26.4605	26.2543	27.3535	25.5148	24.6654	27.291	26.9322	26.2025	25.6811	25.5063	27.5218	26.5564	26.7172	24.7018	25.5985	26.2614	27.2432	26.8118	26.3167	26.4687	26.8984
	P54727	P54727	UV excision repair protein RAD23 homolog B	1	RAD23B	sp|P54727|RD23B_HUMAN UV excision repair protein RAD23 homolog B OS=Homo sapiens OX=9606 GN=RAD23B PE=1 SV=1	26.6481	26.1546	26.2037	23.997	25.6386	22.8121	25.2508	25.6416	25.3426	26.1688	26.0324	25.6617	26.7322	26.3535	25.423	26.2967	26.1642	26.1674	25.023	25.4979	24.9916	25.0928	24.7954	24.9027	26.4798	26.0747	26.4738	25.5015	26.1374	25.5556	26.6115	23.7051	25.7109	25.994	27.0213	26.9912	25.4765	26.1373	25.6277	26.3649	25.5428	24.5204	25.1468
	O43143	O43143	Pre-mRNA-splicing factor ATP-dependent RNA helicase DHX15	1	DHX15	sp|O43143|DHX15_HUMAN Pre-mRNA-splicing factor ATP-dependent RNA helicase DHX15 OS=Homo sapiens OX=9606 GN=DHX15 PE=1 SV=2	26.6316	26.2794	26.0887	25.8896	26.1887	26.0144	26.8055	27.0026	26.8043	26.4023	26.2668	25.9065	26.6057	26.4339	26.7188	27.0265	26.6192	26.7987	26.9156	27.2181	27.1505	26.7244	26.6882	26.133	26.0467	26.0091	26.1993	27.3621	27.6182	27.5429	26.619	26.4798	26.1546	26.8112	26.3709	26.7529	25.8133	26.4202	26.3228	25.9173	25.9564	24.8484	26.7351
	Q9UJZ1	Q9UJZ1	Stomatin-like protein 2, mitochondrial	1	STOML2	sp|Q9UJZ1|STML2_HUMAN Stomatin-like protein 2, mitochondrial OS=Homo sapiens OX=9606 GN=STOML2 PE=1 SV=1	26.6287	27.2322	26.9309	25.9851	26.2703	25.6675	24.6909	25.0585	24.6594	25.5024	25.7526	26.4585	25.1537	25.0179	24.0576	24.6992	24.6039	24.594	23.6696	23.9083	24.2073	25.035	23.7612	24.6104	25.7456	25.4803	26.2248	23.8828	23.7229	23.9202	26.387	25.9627	26.0895	24.6342	25.2575	25.2846	25.7662	26.0331	25.6971	25.5323	25.3845	26.2673	23.9586
	Q9NZZ3	Q9NZZ3	Charged multivesicular body protein 5	1	CHMP5	sp|Q9NZZ3|CHMP5_HUMAN Charged multivesicular body protein 5 OS=Homo sapiens OX=9606 GN=CHMP5 PE=1 SV=1	26.6249	26.5301	26.3267	24.9118	24.9311	25.4376	25.1547	25.8294	25.263	25.7422	25.4154	25.6248	26.5703	26.5665	26.3237	25.7067	25.7837	26.0648	25.4082	25.2327	25.5409	25.9438	25.8814	25.8804	25.8583	25.5483	26.1346	24.9073	24.7308	24.6338	25.421	25.6954	25.5959	24.9678	25.7903	26.0529	25.7189	26.6705	25.7813	26.1926	25.5853	24.7984	25.5797
	Q01082	Q01082	Spectrin beta chain, non-erythrocytic 1	1	SPTBN1	sp|Q01082|SPTB2_HUMAN Spectrin beta chain, non-erythrocytic 1 OS=Homo sapiens OX=9606 GN=SPTBN1 PE=1 SV=2	26.6183	26.6098	26.7358	26.8868	26.5544	26.7283	26.6899	25.8481	26.7106	26.2285	26.6415	26.4094	25.5323	25.1842	26.0683	26.2136	25.8022	26.0148	26.0076	25.9459	25.856	25.9185	25.867	25.5972	26.3436	25.4258	23.8912	26.1588	25.6121	26.2435	26.2788	26.4037	26.403	25.5937	25.3802	25.0629	26.8231	24.3686	26.8367	26.3592	26.5296	26.9699	26.2509
	Q8IY17	Q8IY17	Neuropathy target esterase	1	PNPLA6	sp|Q8IY17|PLPL6_HUMAN Neuropathy target esterase OS=Homo sapiens OX=9606 GN=PNPLA6 PE=1 SV=3	26.6171	26.5431	26.7013	25.4493	25.6738	25.6497	25.7349	26.6063	25.8796	26.3391	26.1822	26.0272	26.3009	26.0924	25.7207	26.3427	26.7274	26.8906	25.4213	25.9694	25.7966	25.4391	25.426	25.1684	25.839	25.6859	26.3572	24.5678	25.2152	24.7075	26.2038	25.9242	25.8728	25.0762	25.2466	25.0644	25.7009	26.6879	26.0736	25.8598	25.7373	25.5483	25.092
	P62873	P62873	Guanine nucleotide-binding protein G(I)/G(S)/G(T) subunit beta-1	1	GNB1	sp|P62873|GBB1_HUMAN Guanine nucleotide-binding protein G(I)/G(S)/G(T) subunit beta-1 OS=Homo sapiens OX=9606 GN=GNB1 PE=1 SV=3	26.607	26.7954	26.8844	27.2175	26.8431	26.8055	27.2897	25.954	26.9855	26.3559	26.4245	26.0532	25.7413	25.6243	26.1133	26.0482	25.9992	26.082	26.3132	26.1561	26.0335	25.8024	25.5788	25.2099	26.3329	25.3756	24.7281	26.3378	25.8713	26.3807	26.726	26.3331	26.2928	25.7362	25.441	24.7099	27.0478	24.8982	27.2361	26.5726	26.8191	27.0429	26.6834
	P42166	P42166	Lamina-associated polypeptide 2, isoform alpha;Thymopoietin;Thymopentin	1	TMPO	sp|P42166|LAP2A_HUMAN Lamina-associated polypeptide 2, isoform alpha OS=Homo sapiens OX=9606 GN=TMPO PE=1 SV=2	26.6058	26.6566	26.7053	25.5934	25.661	25.6449	25.7687	26.3143	25.8043	25.9374	25.9096	26.0095	26.6123	26.6659	26.3222	26.2236	26.6927	26.7114	26.2207	25.9104	26.151	26.1726	26.0614	26.0897	25.9147	25.6588	26.0928	26.0299	25.8742	25.9306	26.4247	25.9622	26.0531	26.0529	25.9656	26.2938	26.2966	26.6303	26.0924	25.7534	25.7138	25.4514	26.1028
	Q8TEX9	Q8TEX9	Importin-4	1	IPO4	sp|Q8TEX9|IPO4_HUMAN Importin-4 OS=Homo sapiens OX=9606 GN=IPO4 PE=1 SV=2	26.5966	25.948	23.9917	23.9813	26.3781	26.076	25.9699	24.5896	26.5558	26.6374	26.1129	25.7616	27.6828	26.7091	28.087	27.9143	25.5337	26.527	27.464	25.2216	26.515	26.6483	26.7112	26.7837	25.9543	25.3598	25.4424	26.1884	28.2979	28.5388	25.5733	25.0871	23.4385	25.785	24.3416	26.0231	26.5558	27.7896	27.2535	25.1704	24.479	24.8378	25.9463
	Q8WUY1	Q8WUY1	Protein THEM6	1	THEM6	sp|Q8WUY1|THEM6_HUMAN Protein THEM6 OS=Homo sapiens OX=9606 GN=THEM6 PE=1 SV=2	26.5909	26.6253	26.7891	26.3592	26.1378	26.5142	25.6425	26.3435	25.7171	26.7693	26.7201	26.833	26.6568	26.5488	26.0194	26.4244	26.7028	26.6263	25.3173	25.7139	25.5413	25.9162	25.8798	25.8943	26.4724	25.896	26.8104	24.3855	25.0842	24.5671	26.6436	26.4578	26.5491	25.1618	25.3783	25.3747	25.9247	27.0717	26.1561	26.8042	26.2445	26.3768	25.7269
	P62826	P62826	GTP-binding nuclear protein Ran	1	RAN	sp|P62826|RAN_HUMAN GTP-binding nuclear protein Ran OS=Homo sapiens OX=9606 GN=RAN PE=1 SV=3	26.5733	26.3891	26.258	26.365	26.4783	26.2213	26.3204	26.2465	26.1486	26.1444	26.0111	26.2959	27.3639	27.659	27.1931	26.7511	26.6146	26.4319	26.3734	26.171	26.5142	26.9343	26.8734	26.7037	26.2592	26.6788	26.2237	26.5963	26.324	26.2575	26.2385	25.9949	25.9086	26.7853	27.0473	27.162	26.4145	26.3505	26.3593	26.5188	26.2782	26.6172	26.7029
	P62258	P62258	14-3-3 protein epsilon	1	YWHAE	sp|P62258|1433E_HUMAN 14-3-3 protein epsilon OS=Homo sapiens OX=9606 GN=YWHAE PE=1 SV=1	26.5613	26.7981	26.6759	26.7455	27.0688	26.6787	26.6722	26.2642	26.616	26.5925	26.7827	26.8176	26.203	26.4518	25.985	26.3583	26.3012	26.4664	26.4167	25.9519	26.4067	26.2561	26.1189	26.5839	26.1879	27.1381	25.8949	26.3993	26.2127	26.1434	26.7708	26.5243	26.8197	26.5436	26.903	26.5956	27.0551	25.8388	26.7953	26.7341	26.6506	27.4266	26.0506
	Q9UMS4	Q9UMS4	Pre-mRNA-processing factor 19	1	PRPF19	sp|Q9UMS4|PRP19_HUMAN Pre-mRNA-processing factor 19 OS=Homo sapiens OX=9606 GN=PRPF19 PE=1 SV=1	26.5591	26.1048	26.2202	25.8021	26.3047	25.7308	26.2818	26.5975	26.6334	26.064	25.8779	25.6987	26.4909	26.3905	26.5972	26.6393	26.1904	26.4865	27.1758	27.3791	27.4478	26.5846	26.7457	25.9859	25.574	25.3314	25.8142	26.4396	26.2837	26.3764	25.7512	26.3232	25.5092	28.0514	27.8396	28.183	26.3202	26.3075	26.4779	26.2663	26.127	25.5451	26.6213
	Q9Y6D5	Q9Y6D5	Brefeldin A-inhibited guanine nucleotide-exchange protein 2	1	ARFGEF2	sp|Q9Y6D5|BIG2_HUMAN Brefeldin A-inhibited guanine nucleotide-exchange protein 2 OS=Homo sapiens OX=9606 GN=ARFGEF2 PE=1 SV=3	26.5562	27.1826	27.183	25.871	24.6377	25.1187	26.3148	26.8796	26.1361	26.0408	26.7624	26.0335	27.7788	27.7619	26.9896	27.1332	26.6334	26.9034	27.0566	26.758	26.7121	26.8542	26.29	26.4519	25.9747	26.3386	26.6637	26.113	26.3649	23.6438	23.8115	25.4424	26.615	25.1161	26.0332	26.1464	26.7394	27.7754	26.681	26.032	26.2289	25.8017	27.0936
	P50990	P50990	T-complex protein 1 subunit theta	1	CCT8	sp|P50990|TCPQ_HUMAN T-complex protein 1 subunit theta OS=Homo sapiens OX=9606 GN=CCT8 PE=1 SV=4	26.5361	26.4461	26.4981	26.4933	26.5119	26.4491	26.7739	26.1974	27.0285	26.075	26.0738	25.9798	25.8038	26.5305	26.2676	26.431	26.299	26.4383	26.3878	26.4083	26.5931	26.4189	26.0989	26.0866	25.7141	25.9209	25.3627	26.8023	26.6168	27.0278	26.2432	26.159	26.1081	25.9474	26.178	26.3141	27.2383	26.041	27.1053	26.2788	26.184	26.6167	26.4989
	P29558	P29558	RNA-binding motif, single-stranded-interacting protein 1	1	RBMS1	sp|P29558|RBMS1_HUMAN RNA-binding motif, single-stranded-interacting protein 1 OS=Homo sapiens OX=9606 GN=RBMS1 PE=1 SV=3	26.5344	26.6667	26.7121	26.4821	26.0702	26.4595	26.8641	27.7023	26.9114	26.9747	26.917	27.1048	27.215	27.0494	26.5442	26.8882	27.5206	27.3109	26.6281	26.7213	27.1092	26.5983	26.854	26.9406	26.9205	26.4008	27.5412	26.5968	27.2919	26.4951	26.5049	27.2849	26.9066	27.1496	26.5865	26.961	26.3538	27.372	26.3817	26.9968	26.6352	26.127	26.4953
	Q9BUP0	Q9BUP0	EF-hand domain-containing protein D1	1	EFHD1	sp|Q9BUP0|EFHD1_HUMAN EF-hand domain-containing protein D1 OS=Homo sapiens OX=9606 GN=EFHD1 PE=1 SV=1	26.5282	26.3727	26.663	27.1434	26.8277	27.402	27.5761	26.2993	27.3086	26.651	27.4622	27.0168	24.6194	23.1721	24.9955	26.8706	26.1829	24.812	25.6893	23.5266	25.1576	26.2255	24.345	24.9496	26.4235	25.5079	24.286	25.5333	25.4003	26.6235	26.4116	26.2572	26.4321	25.7081	25.4776	24.8231	26.9787	23.9702	27.6537	26.7664	26.9807	27.8886	26.0747
	P63104	P63104	14-3-3 protein zeta/delta	1	YWHAZ	sp|P63104|1433Z_HUMAN 14-3-3 protein zeta/delta OS=Homo sapiens OX=9606 GN=YWHAZ PE=1 SV=1	26.5268	26.1397	26.1712	26.5946	26.8136	26.7397	26.4781	26.3372	26.5953	26.9789	26.685	26.2791	26.422	26.6393	25.812	26.5352	26.5007	26.5672	25.8257	25.8584	26.0135	26.7123	26.1138	25.671	26.2899	29.113	26.5556	26.1593	26.2585	26.3754	27.1365	26.6591	26.7544	26.8381	26.7537	26.5237	26.1858	25.4081	26.6745	26.9265	27.0322	27.8894	26.2472
	Q12857	Q12857	Nuclear factor 1 A-type	1	NFIA	sp|Q12857|NFIA_HUMAN Nuclear factor 1 A-type OS=Homo sapiens OX=9606 GN=NFIA PE=1 SV=2	26.5207	26.883	26.9739	20.4632	21.68	20.4867	19.2748	21.3389	18.936	26.037	25.1305	24.7534	27.9915	27.376	26.9076	27.2569	27.4369	28.0013	25.7799	26.222	25.8447	25.8332	25.5264	25.6646	27.0706	26.8137	26.9533	25.1175	26.0419	26.0697	26.9853	26.6554	26.5795	25.8014	26.4062	25.8874	26.143	26.8843	26.2815	25.4268	25.7115	25.5733	25.8573
	Q9Y6M1	Q9Y6M1	Insulin-like growth factor 2 mRNA-binding protein 2	1	IGF2BP2	sp|Q9Y6M1|IF2B2_HUMAN Insulin-like growth factor 2 mRNA-binding protein 2 OS=Homo sapiens OX=9606 GN=IGF2BP2 PE=1 SV=2	26.5171	26.1542	26.3992	25.7987	25.6491	25.5457	26.8119	26.8915	26.2622	26.1038	25.8232	26.1667	26.2892	26.1457	26.3612	26.8509	26.5863	26.4596	26.3911	25.6955	26.2881	25.8034	26.0764	26.1846	26.0571	26.3351	26.4918	26.2825	26.1242	26.1149	26.2246	26.0486	25.5683	26.4306	26.0969	26.2194	26.5694	26.3992	25.8403	26.0515	25.9698	25.8944	26.255
	P17987	P17987	T-complex protein 1 subunit alpha	1	TCP1	sp|P17987|TCPA_HUMAN T-complex protein 1 subunit alpha OS=Homo sapiens OX=9606 GN=TCP1 PE=1 SV=1	26.5136	26.5157	26.5266	26.7753	26.8649	26.9167	27.0371	25.9625	26.9851	26.254	26.3492	26.2371	25.6848	26.32	26.1843	26.2288	26.0616	26.2227	26.2715	26.3624	26.8138	26.1667	25.8049	25.982	25.161	26.5261	25.0047	26.8664	26.4579	27.0705	25.9943	25.8685	25.7894	25.6929	26.4797	26.0224	26.929	26.2157	27.1247	26.3689	26.6262	25.7265	26.5437
	P62879	P62879	Guanine nucleotide-binding protein G(I)/G(S)/G(T) subunit beta-2	1	GNB2	sp|P62879|GBB2_HUMAN Guanine nucleotide-binding protein G(I)/G(S)/G(T) subunit beta-2 OS=Homo sapiens OX=9606 GN=GNB2 PE=1 SV=3	26.5129	26.7205	26.8305	27.3277	26.7718	27.2893	26.7674	25.5703	26.6828	26.3186	26.2011	26.7837	24.9357	25.2659	25.8587	25.7508	25.6434	25.7085	26.1235	25.7714	26.1084	25.1576	25.3245	25.4036	26.4255	25.3586	24.7897	26.3898	25.5878	26.4764	25.6542	26.3701	26.6006	25.1083	25.2882	25.0174	26.8854	24.7835	26.3341	26.5572	26.8661	26.4121	26.4999
	P05387	P05387	60S acidic ribosomal protein P2	1	RPLP2	sp|P05387|RLA2_HUMAN 60S acidic ribosomal protein P2 OS=Homo sapiens OX=9606 GN=RPLP2 PE=1 SV=1	26.5015	26.5425	26.7016	25.5364	25.4578	25.5495	27.5674	28.2132	27.9412	27.0552	26.7714	24.8329	27.5086	27.0231	26.3964	28.2989	26.7107	27.3262	27.219	28.398	27.6181	28.4709	27.9169	26.6492	26.7753	26.5285	25.6467	26.9369	27.4844	27.2503	26.7515	26.1591	26.0297	26.6625	25.7624	26.1088	26.6811	26.3361	27.7729	26.3074	26.1659	21.5156	26.193
	Q14573	Q14573	Inositol 1,4,5-trisphosphate receptor type 3	1	ITPR3	sp|Q14573|ITPR3_HUMAN Inositol 1,4,5-trisphosphate receptor type 3 OS=Homo sapiens OX=9606 GN=ITPR3 PE=1 SV=2	26.4967	26.4101	26.7124	26.5059	26.4439	26.3461	27.1879	25.6643	27.3319	26.4617	26.4994	25.9526	24.6623	24.1258	25.4602	25.611	25.1787	25.6089	25.9894	25.8639	25.8602	25.3907	25.2986	25.2196	25.9183	25.0464	23.3369	25.6434	24.9188	25.8708	26.166	26.0179	26.2274	24.9072	24.2676	23.6092	26.8927	24.4643	26.9988	26.2	26.5503	26.6554	25.8663
	Q9UI42	Q9UI42	Carboxypeptidase A4	1	CPA4	sp|Q9UI42|CBPA4_HUMAN Carboxypeptidase A4 OS=Homo sapiens OX=9606 GN=CPA4 PE=1 SV=2	26.4888	26.2682	26.249	25.4174	23.8461	25.7731	26.062	26.3649	25.5309	25.6227	25.4237	25.3238	27.0977	27.095	27.1351	27.0243	26.2051	24.5384	26.6553	27.0222	27.09	28.4645	26.865	26.4693	25.8734	28.9296	26.2474	26.2474	26.2373	26.2047	25.6199	25.6268	25.4353	26.1217	26.3195	26.3063	26.6598	26.2074	26.1593	25.3949	25.4341	25.1276	26.3725
	P42167	P42167	Lamina-associated polypeptide 2, isoforms beta/gamma;Thymopoietin;Thymopentin	1	TMPO	sp|P42167|LAP2B_HUMAN Lamina-associated polypeptide 2, isoforms beta/gamma OS=Homo sapiens OX=9606 GN=TMPO PE=1 SV=2	26.4881	26.3215	26.7883	25.7646	26.1036	25.9509	26.1252	26.6071	25.8418	26.3574	25.8714	26.2944	26.6748	26.5498	25.8806	26.4436	26.6935	26.7757	26.0802	26.0766	26.1703	26.4278	26.2359	26.2576	25.5958	25.9965	26.6259	26.0455	25.974	25.559	26.4586	26.0967	26.2	25.9757	26.3549	26.712	26.1993	26.7939	26.4631	25.7892	26.1176	25.5032	25.7287
	P63244	P63244	Guanine nucleotide-binding protein subunit beta-2-like 1;Guanine nucleotide-binding protein subunit beta-2-like 1, N-terminally processed	1	GNB2L1	sp|P63244|RACK1_HUMAN Receptor of activated protein C kinase 1 OS=Homo sapiens OX=9606 GN=RACK1 PE=1 SV=3	26.4766	26.0545	26.4223	26.1261	26.1892	26.3103	26.5116	26.4926	26.8327	26.0992	26.2804	25.9304	26.3304	26.5437	26.1118	26.7604	27.0572	26.9627	26.1511	26.2422	26.4343	27.0235	26.698	26.3594	26.1161	26.9801	26.2336	26.5783	26.9855	26.9654	26.3651	26.0688	26.1227	26.693	27.1357	27.278	26.7943	26.3954	27.0735	26.2935	26.088	23.9282	26.9176
	Q9H0D6	Q9H0D6	5-3 exoribonuclease 2	1	XRN2	sp|Q9H0D6|XRN2_HUMAN 5-3 exoribonuclease 2 OS=Homo sapiens OX=9606 GN=XRN2 PE=1 SV=1	26.4751	26.4973	26.4205	26.1286	26.5345	26.0444	26.6881	27.1637	26.6461	26.7858	26.5865	26.7494	26.4654	26.5552	26.5446	26.8112	26.8917	26.8571	26.3608	26.4269	26.5168	26.7601	26.8446	26.8551	26.76	26.4479	26.9987	27.3104	27.5396	27.3418	27.0551	26.621	27.0812	26.6816	26.7881	26.9298	26.0684	26.9694	26.1818	26.6225	26.3373	26.6281	26.4567
	P08865	P08865	40S ribosomal protein SA	1	RPSA	sp|P08865|RSSA_HUMAN 40S ribosomal protein SA OS=Homo sapiens OX=9606 GN=RPSA PE=1 SV=4	26.4738	26.0882	26.0645	25.9581	26.8209	26.215	26.0782	26.1314	26.3207	25.8987	26.2845	26.3528	25.4152	26.2938	25.45	25.72	25.8791	26.0339	26.1416	25.9508	26.5301	26.3036	25.8292	26.0192	25.3713	27.5599	26.1768	25.9333	25.9741	26.0032	25.4362	25.4325	25.8629	26.2366	26.2976	25.6767	26.3434	25.7474	26.658	26.0209	25.6973	24.7203	26.2189
	P05114	P05114	Non-histone chromosomal protein HMG-14	1	HMGN1	sp|P05114|HMGN1_HUMAN Non-histone chromosomal protein HMG-14 OS=Homo sapiens OX=9606 GN=HMGN1 PE=1 SV=3	26.4724	24.9109	24.8505	25.5196	26.1661	25.5583	23.286	23.9527	23.8732	22.1389	24.7536	25.7924	24.1729	24.6861	27.305	26.8566	25.6973	25.2733	25.1847	23.313	24.2299	24.7043	26.1081	22.8606	22.3355	25.5131	25.0933	26.4705	24.6071	24.3232	25.7501	27.0153	25.8879	26.1651	26.0975	26.0429	24.2799	26.2603	25.0525	23.5371	24.2291	25.9606	24.9842
	P23528	P23528	Cofilin-1	1	CFL1	sp|P23528|COF1_HUMAN Cofilin-1 OS=Homo sapiens OX=9606 GN=CFL1 PE=1 SV=3	26.471	26.7253	26.5288	26.6127	26.6523	26.4928	26.5429	26.0605	26.0977	26.5349	26.4388	26.5766	26.3535	26.989	26.2577	25.9342	26.5955	26.2613	26.2938	25.9788	26.7867	26.7347	26.5708	26.793	25.655	27.8847	26.4852	26.0624	26.0621	25.8693	26.1461	25.9885	26.2071	26.4351	26.5376	26.3982	26.4558	26.1896	26.4025	26.3478	26.4789	27.1744	26.8998
	O14654	O14654	Insulin receptor substrate 4	1	IRS4	sp|O14654|IRS4_HUMAN Insulin receptor substrate 4 OS=Homo sapiens OX=9606 GN=IRS4 PE=1 SV=1	26.4593	26.7042	26.6043	26.9023	26.5044	26.8028	26.9431	26.1607	26.6633	26.6207	26.6686	26.6521	25.8535	25.822	26.2894	26.2823	26.0925	26.0667	26.2974	26.1192	26.113	26.0507	26.2472	26.2371	26.3556	25.4639	25.6153	26.8324	26.449	26.8291	26.3954	26.3903	26.4763	26.5763	26.616	26.6535	27.2266	27.0136	27.0424	26.5819	26.8134	27.4014	26.452
	P06396	P06396	Gelsolin	1	GSN	sp|P06396|GELS_HUMAN Gelsolin OS=Homo sapiens OX=9606 GN=GSN PE=1 SV=1	26.4574	26.4917	26.6067	27.177	26.7904	26.822	27.1567	26.0462	27.0727	26.8048	26.9529	26.0033	25.3807	24.6504	25.4801	26.2838	25.6902	25.8066	26.0527	26.5353	25.9094	25.8626	25.8402	24.8403	26.7231	25.879	23.7452	25.8246	25.4993	26.2072	26.5377	26.8163	26.5676	25.3782	25.2374	24.3693	26.8614	23.0827	27.2477	27.0158	27.2731	25.9054	26.1868
	P14174	P14174	Macrophage migration inhibitory factor	1	MIF	sp|P14174|MIF_HUMAN Macrophage migration inhibitory factor OS=Homo sapiens OX=9606 GN=MIF PE=1 SV=4	26.4472	25.852	25.2363	25.3037	26.3961	25.7104	24.9048	24.7514	24.8836	24.3173	24.1665	26.8355	25.4134	27.6722	25.517	25.2257	26.4235	26.2772	26.0041	25.2556	26.7807	27.1744	25.791	26.4097	25.1784	28.072	26.3707	25.8019	25.3144	25.0565	26.0225	24.3938	23.9784	26.4074	27.3488	26.9821	25.7566	24.858	25.1185	25.1582	25.1241	26.0161	24.6121
	P12277	P12277	Creatine kinase B-type	1	CKB	sp|P12277|KCRB_HUMAN Creatine kinase B-type OS=Homo sapiens OX=9606 GN=CKB PE=1 SV=1	26.4469	26.1805	25.8561	26.1939	26.5155	26.2229	26.9993	26.0728	27.1613	25.8056	26.2797	25.4498	25.681	26.7577	25.6567	25.6333	25.7578	25.9213	26.0486	25.7594	26.5238	26.6858	25.4641	25.5842	24.7554	25.8223	25.2495	25.8623	25.6328	26.2732	24.9282	25.2523	23.8739	25.987	26.2092	25.7618	26.0357	23.9146	26.6812	25.444	25.5437	25.2303	25.2166
	Q9NVH1	Q9NVH1	DnaJ homolog subfamily C member 11	1	DNAJC11	sp|Q9NVH1|DJC11_HUMAN DnaJ homolog subfamily C member 11 OS=Homo sapiens OX=9606 GN=DNAJC11 PE=1 SV=2	26.4378	26.5399	27.1149	27.7582	27.6727	27.2203	26.683	27.3567	25.9512	25.8082	27.9943	26.2315	27.6252	26.9607	26.1759	26.6619	26.8742	26.8657	26.5398	25.9667	27.2985	26.9805	26.8899	27.733	27.3086	26.9378	26.5059	27.0313	27.3337	26.9242	27.4713	27.2469	27.3507	27.6659	28.2599	24.0087	27.7463	25.6824	27.1171	27.2321	27.1686	27.7233	26.4346
	P37108	P37108	Signal recognition particle 14 kDa protein	1	SRP14	sp|P37108|SRP14_HUMAN Signal recognition particle 14 kDa protein OS=Homo sapiens OX=9606 GN=SRP14 PE=1 SV=2	26.4377	26.4269	26.3612	26.8757	26.6798	26.5343	25.7532	26.0791	26.4137	27.3616	26.995	26.5678	26.6259	26.364	26.5653	25.2877	26.0139	26.3535	26.6905	26.6514	26.8602	27.3992	27.4664	27.2424	26.9431	26.7269	27.1006	26.4744	25.4071	26.1077	25.9771	27.1381	26.7082	27.1254	26.6649	26.4423	26.4284	26.4305	26.5664	26.506	26.7553	26.2512	26.3958
	P54198	P54198	Protein HIRA	1	HIRA	sp|P54198|HIRA_HUMAN Protein HIRA OS=Homo sapiens OX=9606 GN=HIRA PE=1 SV=2	26.4376	26.3967	26.4841	24.7975	25.0922	24.7575	25.0346	25.6526	25.2047	25.3601	25.4039	25.5054	26.2521	25.9744	25.7804	26.1545	26.2379	26.5077	25.0734	25.5925	25.3972	25.0091	25.3277	24.677	25.9707	25.6543	26.4971	24.8949	24.991	25.0884	25.3429	25.3607	25.4528	25.2939	25.4954	25.7201	25.4162	26.1135	25.5629	25.3594	25.3968	25.3525	25.2533
	Q9BZE4	Q9BZE4	Nucleolar GTP-binding protein 1	1	GTPBP4	sp|Q9BZE4|NOG1_HUMAN Nucleolar GTP-binding protein 1 OS=Homo sapiens OX=9606 GN=GTPBP4 PE=1 SV=3	26.4268	25.8144	25.6128	25.6508	25.8069	24.9538	25.3521	25.7982	25.5177	25.6719	25.1485	26.4921	25.8302	24.4338	27.1878	27.1368	25.7478	26.0392	26.9468	26.5869	26.7357	27.2847	27.7209	27.001	26.2355	25.2963	26.6828	26.7323	26.7747	25.9469	26.0793	26.3651	25.4851	25.6386	25.7877	25.6946	25.2519	26.8451	25.7379	25.6111	25.0382	28.5385	26.868
	Q9NUW8	Q9NUW8	Tyrosyl-DNA phosphodiesterase 1	1	TDP1	sp|Q9NUW8|TYDP1_HUMAN Tyrosyl-DNA phosphodiesterase 1 OS=Homo sapiens OX=9606 GN=TDP1 PE=1 SV=2	26.4255	26.5099	26.3996	25.6471	25.8038	25.8281	25.678	26.6509	25.7918	26.3503	26.0927	25.6916	26.6098	26.191	25.9719	26.6406	26.7543	26.9673	25.4649	26.0573	26.035	25.7107	25.7804	25.4518	26.018	25.6046	26.2497	25.9517	26.2052	25.9239	25.3393	25.4737	25.3139	26.0167	25.9094	25.9011	25.6453	26.8051	26.0351	25.4685	25.5993	24.9571	25.8374
	P63096	P63096	Guanine nucleotide-binding protein G(i) subunit alpha-1	1	GNAI1	sp|P63096|GNAI1_HUMAN Guanine nucleotide-binding protein G(i) subunit alpha-1 OS=Homo sapiens OX=9606 GN=GNAI1 PE=1 SV=2	26.4244	25.5052	25.6936	25.812	25.7582	25.4162	25.5037	24.7896	25.4066	24.3805	24.4637	24.679	21.7081	23.3969	25.4804	23.9711	25.0423	24.4563	25.6269	25.0103	24.9305	24.6556	23.2184	24.4776	25.3812	23.5129	22.9159	25.2023	24.6135	25.2734	25.0597	25.0392	25.3425	24.5392	24.7657	24.3483	26.1105	24.275	25.7772	25.1659	25.5159	25.4469	26.9059
	Q13247	Q13247	Serine/arginine-rich splicing factor 6	1	SRSF6	sp|Q13247|SRSF6_HUMAN Serine/arginine-rich splicing factor 6 OS=Homo sapiens OX=9606 GN=SRSF6 PE=1 SV=2	26.4227	25.8206	25.9236	25.1792	25.6827	25.8977	26.0087	26.5846	25.7502	26.2865	25.9736	26.1648	26.9113	26.8164	26.6979	25.9903	26.9942	26.9369	26.9373	26.8603	26.6036	26.8083	26.9334	26.7322	25.401	25.5694	26.8116	26.545	26.57	26.7344	26.8258	26.7974	25.0714	28.1857	28.1912	28.5219	25.4565	26.0203	25.7134	25.914	25.893	26.8847	26.8588
	O00425	O00425	Insulin-like growth factor 2 mRNA-binding protein 3	1	IGF2BP3	sp|O00425|IF2B3_HUMAN Insulin-like growth factor 2 mRNA-binding protein 3 OS=Homo sapiens OX=9606 GN=IGF2BP3 PE=1 SV=2	26.4138	26.2299	26.4231	25.5562	25.9643	25.9374	26.7175	27.4978	26.9121	26.4131	26.4688	25.8226	26.5818	26.3815	26.2264	26.9734	27.1652	27.2861	26.1487	26.4961	26.1355	26.7132	27.0813	26.4481	25.9284	25.444	25.9684	26.6234	26.9206	26.7212	26.1178	26.0583	25.9763	26.2953	25.9614	26.3502	25.974	26.55	26.3077	26.2081	26.0221	25.0052	26.4537
	P62995	P62995	Transformer-2 protein homolog beta	1	TRA2B	sp|P62995|TRA2B_HUMAN Transformer-2 protein homolog beta OS=Homo sapiens OX=9606 GN=TRA2B PE=1 SV=1	26.4062	26.4544	26.2342	27.3703	27.5896	27.7096	26.2091	26.1196	26.1927	26.3623	27.9243	27.7167	27.2869	26.9852	27.563	26.8104	27.364	27.0232	26.2239	26.019	26.1818	26.1559	26.7934	26.7091	27.8563	27.5855	28.1465	27.3108	27.3096	27.3942	27.9902	27.6492	27.4581	29.5738	29.8349	29.9746	26.0088	26.6589	25.5626	27.7161	27.6067	29.4596	27.1818
	P14923	P14923	Junction plakoglobin	1	JUP	sp|P14923|PLAK_HUMAN Junction plakoglobin OS=Homo sapiens OX=9606 GN=JUP PE=1 SV=3	26.4058	26.1111	26.4872	26.1933	26.0124	26.1495	26.4055	25.3544	26.7781	26.6862	26.1765	26.0022	25.6441	26.118	26.3337	26.5894	26.0188	25.5152	25.7201	26.0726	25.7044	25.5317	25.6597	25.3381	26.502	28.6593	24.9083	26.1684	25.6431	26.2061	25.8623	26.182	26.0371	25.4568	25.5994	25.1658	26.1869	24.9041	26.4458	26.0881	26.2072	26.3635	26.1595
	Q02930	Q02930	Cyclic AMP-responsive element-binding protein 5	1	CREB5	sp|Q02930|CREB5_HUMAN Cyclic AMP-responsive element-binding protein 5 OS=Homo sapiens OX=9606 GN=CREB5 PE=1 SV=3	26.4045	25.638	25.3311	25.06	24.6484	24.9983	23.6987	25.3721	26.5137	24.7224	24.0763	25.0862	26.3415	26.3823	26.4484	25.5935	25.3564	25.9467	25.6926	25.6308	26.685	26.3455	25.5882	25.785	25.0793	25.0498	26.3799	25.2948	25.7178	25.4272	25.2911	25.0493	25.1739	26.1567	26.3251	25.9839	25.2424	26.3262	26.0081	25.7722	24.5787	25.2328	26.1612
	Q13625	Q13625	Apoptosis-stimulating of p53 protein 2	1	TP53BP2	sp|Q13625|ASPP2_HUMAN Apoptosis-stimulating of p53 protein 2 OS=Homo sapiens OX=9606 GN=TP53BP2 PE=1 SV=2	26.4042	26.3736	26.45	26.2032	26.4897	26.0254	26.8238	26.2457	27.3707	26.2667	26.4712	26.2406	26.1064	26.1045	26.1178	26.3574	26.2165	26.3212	26.1869	25.929	25.9577	26.0879	26.2512	25.4868	26.399	26.066	25.7489	26.2582	25.828	25.8571	25.7872	26.0213	25.8569	28.4925	26.1879	26.3981	26.4361	25.963	27.2808	25.8772	26.9246	26.0382	26.5367
	P08754	P08754	Guanine nucleotide-binding protein G(k) subunit alpha	1	GNAI3	sp|P08754|GNAI3_HUMAN Guanine nucleotide-binding protein G(k) subunit alpha OS=Homo sapiens OX=9606 GN=GNAI3 PE=1 SV=3	26.403	26.673	26.6546	26.7052	26.5483	26.791	26.4446	25.4521	26.264	25.8888	26.363	25.7587	25.2689	25.3747	26.1297	25.5416	25.3126	25.3892	25.9941	25.6517	26.1081	25.4987	25.2277	24.8821	26.2386	25.2492	23.5801	26.0566	24.9293	26.5037	26.0328	25.9145	26.2882	25.2789	25.3376	24.1104	26.8271	24.1377	26.3462	26.271	26.0744	25.5145	26.4875
	P40937	P40937	Replication factor C subunit 5	1	RFC5	sp|P40937|RFC5_HUMAN Replication factor C subunit 5 OS=Homo sapiens OX=9606 GN=RFC5 PE=1 SV=1	26.4016	26.7455	26.3875	26.014	25.805	25.876	26.1811	27.0893	26.2592	26.0513	25.843	26.1167	26.8723	26.8335	26.5232	27.2899	27.0915	27.081	26.4632	26.771	27.0231	26.7418	26.6002	26.9671	26.1963	25.3977	27.0313	26.49	26.8954	26.5921	25.6408	25.8757	25.8969	26.3513	26.9538	27.0111	25.9844	27.2716	26.2745	26.2795	25.95	27.0003	26.7225
	P62136	P62136	Serine/threonine-protein phosphatase PP1-alpha catalytic subunit	1	PPP1CA	sp|P62136|PP1A_HUMAN Serine/threonine-protein phosphatase PP1-alpha catalytic subunit OS=Homo sapiens OX=9606 GN=PPP1CA PE=1 SV=1	26.3967	26.2116	26.3668	26.4665	26.9325	26.6857	27.1266	26.6626	27.1114	27.2216	26.9745	26.0127	26.2241	25.944	26.2985	26.7382	26.1787	26.3767	26.1913	26.7553	26.2482	26.3867	26.2594	25.6165	26.274	25.7078	23.9291	26.1807	26.2487	26.7852	26.2581	26.5252	26.6963	26.0428	26.1322	26.1669	26.4199	25.6025	27.1875	26.539	26.6033	23.3458	26.5566
	Q12800	Q12800	Alpha-globin transcription factor CP2	1	TFCP2	sp|Q12800|TFCP2_HUMAN Alpha-globin transcription factor CP2 OS=Homo sapiens OX=9606 GN=TFCP2 PE=1 SV=2	26.3941	26.2135	26.3122	25.3666	25.8372	26.0897	26.5183	27.4282	26.3944	24.9523	25.3276	22.9565	26.9752	26.4629	26.3915	27.1079	27.2606	27.3175	25.0248	25.5185	25.1679	24.9859	25.1273	25.0352	25.4752	24.5401	25.7884	25.7881	26.0758	25.7158	25.3178	25.5155	24.9987	24.9968	24.7604	25.0645	25.6726	26.5547	25.7548	24.9335	25.0628	24.7523	25.4979
	Q9Y5B9	Q9Y5B9	FACT complex subunit SPT16	1	SUPT16H	sp|Q9Y5B9|SP16H_HUMAN FACT complex subunit SPT16 OS=Homo sapiens OX=9606 GN=SUPT16H PE=1 SV=1	26.3857	25.3808	25.5485	25.7635	26.252	25.4352	23.1491	24.9739	24.5647	25.0664	24.6754	25.1344	25.7921	25.0244	26.8196	27.2096	26.047	26.1778	25.8059	24.6489	24.7367	25.0366	26.2719	24.9087	25.347	24.809	26.4534	25.518	25.427	24.5513	25.7829	26.7808	25.9322	26.2642	25.9715	26.2408	25.1377	26.707	25.6748	25.3388	25.343	26.187	26.1601
	P0DN76	P0DN76;Q01081	Splicing factor U2AF 35 kDa subunit	3	U2AF1	sp|P0DN76|U2AF5_HUMAN Splicing factor U2AF 35 kDa subunit-like protein OS=Homo sapiens OX=9606 GN=U2AF1L5 PE=1 SV=1;sp|Q01081|U2AF1_HUMAN Splicing factor U2AF 35 kDa subunit OS=Homo sapiens OX=9606 GN=U2AF1 PE=1 SV=3	26.3829	26.0256	26.0999	26.5021	27.2374	26.2274	26.6598	26.7779	26.4725	26.7425	26.6155	27.0611	27.3026	27.1265	26.5544	26.8723	27.1147	26.8451	26.5394	26.8756	26.9397	26.9464	27.2608	26.9131	27.4449	26.3532	27.5932	27.4644	28.0781	27.7554	27.032	26.8657	27.118	27.5761	27.6258	27.8471	25.7627	26.9911	26.7598	26.886	26.5835	27.0254	26.6952
	P25440	P25440	Bromodomain-containing protein 2	1	BRD2	sp|P25440|BRD2_HUMAN Bromodomain-containing protein 2 OS=Homo sapiens OX=9606 GN=BRD2 PE=1 SV=2	26.3819	25.9318	26.2259	25.6615	25.4803	25.4789	26.0598	25.6231	26.1675	26.3279	26.2163	25.6831	25.1526	24.8937	25.0171	26.5211	26.4814	26.4603	25.8794	25.784	25.7801	25.0036	25.3651	25.0805	26.1267	25.5549	25.7637	23.5317	23.3914	23.7205	26.0785	26.0363	26.2258	24.4376	24.1686	24.2095	26.304	25.3023	26.3294	25.6286	25.9623	26.0123	24.5244
	P11387	P11387	DNA topoisomerase 1	2	TOP1	sp|P11387|TOP1_HUMAN DNA topoisomerase 1 OS=Homo sapiens OX=9606 GN=TOP1 PE=1 SV=2	26.3726	25.7478	25.905	25.9347	26.0182	26.0304	25.8294	26.1876	25.6067	26.4681	26.1476	26.0713	27.0672	26.5446	26.681	26.9193	26.4208	26.4766	26.1598	26.509	26.2927	26.5029	26.6796	25.6404	26.5464	26.257	26.1586	26.0705	25.601	25.8751	26.4134	26.7077	26.2341	26.2929	26.2164	26.2927	25.4577	26.3941	25.9879	25.4623	25.6889	24.1734	26.2241
	P55795	P55795	Heterogeneous nuclear ribonucleoprotein H2	1	HNRNPH2	sp|P55795|HNRH2_HUMAN Heterogeneous nuclear ribonucleoprotein H2 OS=Homo sapiens OX=9606 GN=HNRNPH2 PE=1 SV=1	26.3721	25.7805	26.0364	26.377	26.234	26.2154	26.4146	27.5335	26.4556	27.0378	26.9053	26.1965	26.8609	26.8428	25.9993	26.9334	27.0165	27.1726	26.4075	26.5892	26.5196	26.1691	26.4831	26.0118	26.5517	26.0326	26.354	27.4483	28.2747	27.855	27.1336	26.8741	26.9622	26.7571	27.088	27.1845	25.8226	26.3807	25.4007	25.8237	26.5099	25.2584	27.1429
	P49458	P49458	Signal recognition particle 9 kDa protein	1	SRP9	sp|P49458|SRP09_HUMAN Signal recognition particle 9 kDa protein OS=Homo sapiens OX=9606 GN=SRP9 PE=1 SV=2	26.367	26.5248	26.2703	25.8606	25.7896	25.9859	26.1978	26.3256	26.328	26.0453	26.3288	25.9025	26.0718	26.0712	26.4593	25.9208	26.394	26.3049	26.2951	26.1333	26.5249	27.0655	27.1994	27.0676	26.0062	25.3116	25.9339	26.0231	26.0231	25.888	25.974	26.1638	25.6957	25.6973	25.7819	25.9581	26.2	26.415	25.9508	25.9195	25.5885	25.7188	25.957
	Q99623	Q99623	Prohibitin-2	1	PHB2	sp|Q99623|PHB2_HUMAN Prohibitin-2 OS=Homo sapiens OX=9606 GN=PHB2 PE=1 SV=2	26.3444	26.0039	25.3536	25.191	25.6603	25.4821	25.027	24.8549	26.1866	25.1179	24.8837	25.2738	24.6034	26.2088	25.0978	25.1264	24.4607	25.689	25.9545	25.2288	25.783	26.26	24.8998	25.2316	24.4469	25.434	24.837	25.4242	24.8774	25.6582	25.9938	24.3426	23.3494	25.5639	26.4841	26.1903	25.6553	24.0223	25.7351	24.7067	25.2837	26.6186	25.1731
	P61604	P61604	10 kDa heat shock protein, mitochondrial	1	HSPE1	sp|P61604|CH10_HUMAN 10 kDa heat shock protein, mitochondrial OS=Homo sapiens OX=9606 GN=HSPE1 PE=1 SV=2	26.3436	26.2306	25.9165	25.4962	26.3527	25.2539	25.2244	25.1932	25.1809	25.781	25.4448	25.9217	26.0492	27.4728	25.4837	25.8367	26.0448	25.8822	26.1509	25.4383	26.6181	26.8954	25.8147	26.3654	25.4121	26.3531	26.1994	26.0213	25.6674	25.4975	25.8086	24.9009	24.8253	26.6968	27.0813	26.8675	25.4317	25.2729	25.6732	25.8641	25.9176	25.4835	25.2186
	P22234	P22234	Multifunctional protein ADE2;Phosphoribosylaminoimidazole-succinocarboxamide synthase;Phosphoribosylaminoimidazole carboxylase	1	PAICS	sp|P22234|PUR6_HUMAN Multifunctional protein ADE2 OS=Homo sapiens OX=9606 GN=PAICS PE=1 SV=3	26.3273	26.2799	26.3579	26.6193	26.6784	26.0245	26.2305	26.0528	26.3015	25.7639	26.2008	26.5599	25.8632	26.5362	26.0334	25.1402	26.145	26.0375	26.0956	25.8654	26.3382	26.1622	25.8349	25.9472	26.247	25.7318	25.6687	26.4043	26.0624	26.3422	26.4878	26.3783	26.7117	26.0483	26.1745	26.3382	26.7456	25.3975	26.329	26.5707	26.3915	26.2495	26.0353
	P09234	P09234	U1 small nuclear ribonucleoprotein C	1	SNRPC	sp|P09234|RU1C_HUMAN U1 small nuclear ribonucleoprotein C OS=Homo sapiens OX=9606 GN=SNRPC PE=1 SV=1	26.3237	26.161	25.8489	23.4389	24.5486	24.9247	25.2563	26.1041	25.5281	24.6383	23.9841	24.3263	25.4889	25.4671	25.7124	24.595	25.7792	25.8965	25.4669	24.8322	25.559	24.8551	25.0763	25.0013	24.4797	24.5198	25.0749	25.5923	25.7451	26.1481	24.21	24.5038	24.2416	23.9515	24.1857	24.5556	25.4312	26.2186	24.7986	23.3585	24.0015	23.5993	24.9419
	P20585	P20585	DNA mismatch repair protein Msh3	1	MSH3	sp|P20585|MSH3_HUMAN DNA mismatch repair protein Msh3 OS=Homo sapiens OX=9606 GN=MSH3 PE=1 SV=4	26.3158	26.4483	26.2148	25.8783	25.9114	25.8818	25.8183	26.5689	26.1967	26.2973	25.7127	25.6144	26.4983	26.3919	25.9382	26.6065	26.7712	26.8567	25.7043	26.0718	25.7551	25.7709	25.8215	25.6811	26.6119	25.8856	26.3231	25.5333	26.0667	25.6225	25.9239	25.5292	25.3833	25.7152	25.9025	25.9986	25.5037	26.418	25.8861	25.4526	24.8141	25.7922	25.8837
	P07195	P07195	L-lactate dehydrogenase B chain	3	LDHB	sp|P07195|LDHB_HUMAN L-lactate dehydrogenase B chain OS=Homo sapiens OX=9606 GN=LDHB PE=1 SV=2	26.3087	26.6228	26.0797	26.7505	27.087	26.4208	26.1372	25.7696	26.1472	26.127	26.2954	26.7666	26.2628	27.2838	25.8363	25.4843	26.1874	26.0817	26.0423	25.5914	26.6611	26.7186	25.5766	26.3969	26.232	26.3882	26.773	25.8799	25.9577	25.6788	26.6175	26.2899	26.2803	26.5693	27.0669	27.1118	26.6271	24.9948	26.3531	26.3446	26.3907	27.3579	25.489
	P00338	P00338	L-lactate dehydrogenase A chain	1	LDHA	sp|P00338|LDHA_HUMAN L-lactate dehydrogenase A chain OS=Homo sapiens OX=9606 GN=LDHA PE=1 SV=2	26.2999	26.058	25.8587	26.6791	27.0181	26.5678	26.3516	25.7294	26.3921	26.648	26.5793	26.861	25.8202	26.9666	25.4402	25.2976	25.9603	26.0901	25.6923	25.4961	26.5969	26.7469	25.5446	25.7106	25.8988	29.2368	26.0201	25.9066	25.8584	25.7602	26.0157	25.8455	25.5651	26.5347	26.7607	26.2881	26.1389	24.8311	26.3444	26.244	26.4179	25.7343	25.2089
	P50991	P50991	T-complex protein 1 subunit delta	1	CCT4	sp|P50991|TCPD_HUMAN T-complex protein 1 subunit delta OS=Homo sapiens OX=9606 GN=CCT4 PE=1 SV=4	26.2919	26.3717	26.2876	26.8022	26.7826	26.887	26.6147	25.8747	26.4399	25.6913	26.4336	26.4943	25.4949	26.2025	25.9281	25.8529	25.8377	25.9939	26.2507	25.9354	26.6638	26.1575	25.826	26.0652	25.7665	26.3569	25.0438	26.6024	26.3986	26.7749	25.7427	25.9579	25.8842	26.0754	25.9619	25.8595	26.8601	25.9931	26.6479	26.3301	26.2474	25.7712	26.3386
	P78371	P78371	T-complex protein 1 subunit beta	1	CCT2	sp|P78371|TCPB_HUMAN T-complex protein 1 subunit beta OS=Homo sapiens OX=9606 GN=CCT2 PE=1 SV=4	26.2907	26.2084	26.1412	26.7784	26.475	26.6335	26.9815	26.2129	26.9542	26.217	26.6527	26.329	25.7772	26.0733	25.687	26.0028	25.8697	26.218	26.006	26.2807	26.1756	26.1771	25.6473	25.2232	25.8616	26.2136	24.975	26.7383	26.6326	27.3358	26.1145	25.9584	25.6369	26.3096	26.249	25.785	26.7201	25.8129	27.1658	26.2421	26.2882	26.0774	26.4626
	O00567	O00567	Nucleolar protein 56	1	NOP56	sp|O00567|NOP56_HUMAN Nucleolar protein 56 OS=Homo sapiens OX=9606 GN=NOP56 PE=1 SV=4	26.2894	25.4607	25.4638	25.2864	25.9072	25.3258	25.0285	25.1766	25.1741	25.399	25.4847	25.1146	25.6526	25.3583	26.7738	26.5039	25.7048	25.9336	26.1223	26.1304	26.0467	26.4398	26.9294	26.3206	25.8743	25.0857	25.7655	25.9607	25.489	25.3123	26.0329	26.4221	25.5332	25.7727	25.2062	25.5352	25.1681	26.0498	25.6699	24.8617	25.262	26.0632	26.3222
	P55072	P55072	Transitional endoplasmic reticulum ATPase	1	VCP	sp|P55072|TERA_HUMAN Transitional endoplasmic reticulum ATPase OS=Homo sapiens OX=9606 GN=VCP PE=1 SV=4	26.2884	26.2318	26.1871	26.5986	26.1297	26.3537	26.5661	25.5571	26.6894	25.5207	25.9812	25.5801	25.0778	25.7831	25.7258	25.3764	25.5151	25.6978	26.1249	25.8687	26.2772	25.8915	25.4153	25.403	25.6905	27.4923	24.4921	26.2135	25.6497	26.269	25.6583	25.6804	25.9309	25.5503	25.4019	24.7618	26.7512	24.7361	26.6147	26.0762	26.0637	25.0506	25.9939
	Q86U42	Q86U42	Polyadenylate-binding protein 2	2	PABPN1	sp|Q86U42|PABP2_HUMAN Polyadenylate-binding protein 2 OS=Homo sapiens OX=9606 GN=PABPN1 PE=1 SV=3	26.2863	25.5618	25.574	24.8515	25.6534	24.7771	25.8972	26.524	25.7669	25.3928	25.1744	24.6804	26.1626	26.0936	26.6092	26.5707	26.075	26.2136	25.4982	25.1203	25.348	25.1557	25.6794	25.2384	25.1034	25.1374	24.8674	25.7947	26.1974	25.6458	24.9965	25.9321	25.4648	26.3621	26.3569	26.7116	25.0471	25.9051	24.8344	24.8787	25.1558	24.8289	27.0411
	Q9Y265	Q9Y265	RuvB-like 1	1	RUVBL1	sp|Q9Y265|RUVB1_HUMAN RuvB-like 1 OS=Homo sapiens OX=9606 GN=RUVBL1 PE=1 SV=1	26.279	25.8111	26.066	25.9643	25.7306	26.0475	26.0604	25.8768	26.5563	25.73	25.6936	25.088	26.5066	26.4974	26.5397	26.9879	26.3567	26.6697	25.8902	26.1843	26.1313	25.8729	25.871	25.4314	25.754	25.6759	25.6321	25.9607	26.1269	26.3281	25.5628	25.8023	25.5196	26.0042	25.974	26.2146	26.2114	26.1287	26.5873	25.6283	25.7896	25.3297	26.3455
	Q9UPU5	Q9UPU5	Ubiquitin carboxyl-terminal hydrolase 24	1	USP24	sp|Q9UPU5|UBP24_HUMAN Ubiquitin carboxyl-terminal hydrolase 24 OS=Homo sapiens OX=9606 GN=USP24 PE=1 SV=3	26.2699	26.2703	26.3403	25.2601	25.366	25.2438	25.9107	27.0974	26.3883	25.4122	24.9533	25.0416	27.1766	26.4121	26.3309	26.3991	26.5697	26.4908	26.2402	26.895	26.5015	26.6742	26.7446	26.1237	24.5739	25.3805	25.4378	26.2164	26.334	25.5646	25.595	24.9773	25.064	25.3933	25.4131	24.4679	25.8234	26.0685	26.2107	25.0323	25.1954	24.6744	26.1842
	P46087	P46087	Probable 28S rRNA (cytosine(4447)-C(5))-methyltransferase	1	NOP2	sp|P46087|NOP2_HUMAN Probable 28S rRNA (cytosine(4447)-C(5))-methyltransferase OS=Homo sapiens OX=9606 GN=NOP2 PE=1 SV=2	26.2659	25.6781	25.4973	25.3447	25.8984	24.8749	24.8382	25.2	24.8373	25.4447	25.7316	25.705	25.9336	25.6616	26.882	26.5522	25.9822	25.9483	26.274	26.1135	26.013	26.5489	27.0685	26.4914	25.7243	25.3331	26.518	25.9587	25.6049	25.2167	25.8443	26.1217	25.215	25.3419	25.0819	25.3825	25.0907	26.4218	25.0909	24.5571	25.0198	24.6245	26.0874
	P14649	P14649	Myosin light chain 6B	1	MYL6B	sp|P14649|MYL6B_HUMAN Myosin light chain 6B OS=Homo sapiens OX=9606 GN=MYL6B PE=1 SV=1	26.2652	25.9087	26.1905	26.3454	26.2008	26.3643	26.967	26.0132	27.1639	26.0882	26.549	26.0027	25.4653	24.3659	25.8169	26.9686	25.3367	25.9005	26.0833	26.1562	25.1034	25.8202	25.7429	24.8296	26.0458	25.0386	22.8243	26.0666	25.984	26.7871	26.112	26.3762	25.8829	24.7731	25.0909	24.6563	26.7691	24.2125	27.2684	26.066	26.9867	25.1496	26.6213
	P46063	P46063	ATP-dependent DNA helicase Q1	1	RECQL	sp|P46063|RECQ1_HUMAN ATP-dependent DNA helicase Q1 OS=Homo sapiens OX=9606 GN=RECQL PE=1 SV=3	26.2598	26.126	26.4662	25.9093	26.2267	25.9091	26.1484	27.1297	26.4129	26.5121	26.4741	26.8099	27.2292	26.9569	26.2642	27.1552	27.2295	27.1993	26.0246	26.444	26.3164	26.6214	26.6136	26.8045	26.2442	26.3586	26.7938	25.6565	26.4918	26.1191	26.7638	26.5217	26.5405	26.505	26.4767	26.6998	25.5154	26.9745	26.1359	26.7334	26.5902	27.6741	26.2329
	P49327	P49327	Fatty acid synthase;[Acyl-carrier-protein] S-acetyltransferase;[Acyl-carrier-protein] S-malonyltransferase;3-oxoacyl-[acyl-carrier-protein] synthase;3-oxoacyl-[acyl-carrier-protein] reductase;3-hydroxyacyl-[acyl-carrier-protein] dehydratase;Enoyl-[acyl-carrier-protein] reductase;Oleoyl-[acyl-carrier-protein] hydrolase	1	FASN	sp|P49327|FAS_HUMAN Fatty acid synthase OS=Homo sapiens OX=9606 GN=FASN PE=1 SV=3	26.2587	26.1811	26.197	26.2847	26.0884	26.4004	27.0093	26.2513	26.8838	26.073	26.3307	25.6562	25.5775	26.0218	25.898	25.9936	25.7255	25.9209	26.1119	26.0426	26.3121	26.1483	25.7258	25.4784	25.3413	26.5304	24.9391	26.6683	26.6636	26.8082	26.0495	25.63	25.8648	25.7037	25.5997	25.3849	26.5906	24.0954	26.8851	25.9612	26.1731	25.9754	26.3163
	Q00610	Q00610	Clathrin heavy chain 1	1	CLTC	sp|Q00610|CLH1_HUMAN Clathrin heavy chain 1 OS=Homo sapiens OX=9606 GN=CLTC PE=1 SV=5	26.2471	26.4042	26.535	26.8582	26.5245	27.038	27.0495	26.0389	27.0652	26.3387	26.8097	26.2467	26.052	25.9269	26.1832	26.4919	25.9969	26.2641	26.2524	26.4558	26.417	26.2737	25.5693	25.648	26.1131	26.879	25.143	26.534	26.2525	26.9312	26.6906	26.5327	26.4655	26.0888	26.1958	25.7274	26.9811	24.8364	27.2902	26.5361	26.7169	25.9275	26.6516
	P08651	P08651	Nuclear factor 1 C-type	1	NFIC	sp|P08651|NFIC_HUMAN Nuclear factor 1 C-type OS=Homo sapiens OX=9606 GN=NFIC PE=1 SV=2	26.2457	26.224	26.4619	18.9286	18.9178	18.2508	20.5191	21.599	19.8862	25.0763	25.0912	23.8881	27.5364	26.4731	26.188	26.8303	27.2798	27.0847	25.4387	26.03	25.3078	25.1232	25.1873	24.7304	26.7511	26.1796	26.7943	25.3389	25.2281	25.1963	26.8689	25.9066	25.6815	24.9899	25.6827	26.445	24.9525	26.6109	25.8308	24.7333	24.6079	25.4282	25.7299
	Q1KMD3	Q1KMD3	Heterogeneous nuclear ribonucleoprotein U-like protein 2	1	HNRNPUL2	sp|Q1KMD3|HNRL2_HUMAN Heterogeneous nuclear ribonucleoprotein U-like protein 2 OS=Homo sapiens OX=9606 GN=HNRNPUL2 PE=1 SV=1	26.2454	26.3162	26.3178	25.7387	25.8648	25.6843	25.814	26.6625	25.863	25.9098	25.7613	25.8373	26.5673	26.3546	26.7136	26.3768	26.7081	26.5939	26.0872	25.7689	25.7122	25.969	26.1766	26.3662	26.0081	25.8731	26.4419	26.1037	25.8532	25.751	25.9518	26.0908	25.9104	26.1459	26.4269	26.5186	25.9016	26.6716	25.5167	25.8301	25.7112	26.7744	26.1503
	Q9HD42	Q9HD42	Charged multivesicular body protein 1a	1	CHMP1A	sp|Q9HD42|CHM1A_HUMAN Charged multivesicular body protein 1a OS=Homo sapiens OX=9606 GN=CHMP1A PE=1 SV=1	26.2423	26.6188	26.7082	25.1911	25.7025	24.6819	25.3375	26.0741	25.443	27.2138	26.2876	26.1673	27.2047	26.5284	26.214	26.497	26.3815	26.2023	25.4989	25.6959	25.5506	26.0795	26.1869	26.1321	25.9345	25.8785	26.5637	24.6604	25.2152	24.7513	26.3211	26.1	25.8238	26.3608	25.7188	26.0096	25.7502	26.6751	26.0718	26.2918	26.0099	25.5136	25.7544
	P39019	P39019	40S ribosomal protein S19	1	RPS19	sp|P39019|RS19_HUMAN 40S ribosomal protein S19 OS=Homo sapiens OX=9606 GN=RPS19 PE=1 SV=2	26.2412	26.4069	26.057	25.5642	26.0456	25.9718	25.997	26.773	25.8669	26.4931	26.1193	25.8037	26.3409	26.7167	25.6846	26.1626	26.5555	26.4315	26.5674	26.9803	27.0403	26.8011	26.7887	26.8485	26.8016	26.9997	26.8098	26.1841	26.9562	26.5526	26.4731	26.3577	26.2882	26.8093	26.368	26.344	25.659	26.0015	25.932	26.8816	26.6454	25.005	25.9573
	P35222	P35222	Catenin beta-1	1	CTNNB1	sp|P35222|CTNB1_HUMAN Catenin beta-1 OS=Homo sapiens OX=9606 GN=CTNNB1 PE=1 SV=1	26.2384	26.1693	26.3333	25.8223	25.6756	26.0235	26.3476	25.0611	26.3418	25.4336	25.6655	25.0274	25.1407	25.284	25.9958	25.8847	25.7004	25.7755	25.6342	25.5468	25.5172	25.7281	25.657	25.375	25.2477	26.2584	23.1156	25.7693	25.1762	25.9576	25.5566	25.71	25.5134	25.3205	25.3574	24.6107	26.4755	23.8147	26.2568	25.8314	25.8407	26.1374	26.2004
	Q9Y2W1	Q9Y2W1	Thyroid hormone receptor-associated protein 3	1	THRAP3	sp|Q9Y2W1|TR150_HUMAN Thyroid hormone receptor-associated protein 3 OS=Homo sapiens OX=9606 GN=THRAP3 PE=1 SV=2	26.234	25.9831	25.9745	25.404	25.6458	25.823	25.6374	26.094	25.562	25.7396	25.5251	25.5678	26.4724	26.4161	26.3717	27.0468	26.9412	26.5906	26.1967	25.9583	25.8691	25.933	26.1076	25.9746	25.9043	25.296	25.8235	26.4158	26.3012	26.5195	26.3058	26.3467	25.8051	28.9614	29.4372	29.5506	25.2496	26.1269	25.695	25.8683	26.0933	27.0605	26.6246
	O00422	O00422	Histone deacetylase complex subunit SAP18	1	SAP18	sp|O00422|SAP18_HUMAN Histone deacetylase complex subunit SAP18 OS=Homo sapiens OX=9606 GN=SAP18 PE=1 SV=1	26.2332	25.8638	26.1608	26.6335	27.1595	27.0941	26.056	26.0048	26.1648	26.4909	27.0934	26.835	27.0029	26.6316	26.5221	26.2663	26.5237	26.3072	25.5965	25.3568	24.7959	25.5385	25.8207	25.4995	26.7935	25.9192	26.693	26.1304	26.2333	25.4961	27.5183	27.4969	26.9658	27.6612	27.7532	28.3723	25.8738	26.1286	25.8382	26.7867	26.4232	24.1289	26.8035
	O15078	O15078	Centrosomal protein of 290 kDa	1	CEP290	sp|O15078|CE290_HUMAN Centrosomal protein of 290 kDa OS=Homo sapiens OX=9606 GN=CEP290 PE=1 SV=2	26.2321	25.1777	25.3699	27.6183	27.611	27.7657	26.2324	25.9229	26.2393	27.618	27.2385	25.8337	27.9127	25.8389	25.9993	26.4539	26.2077	26.004	25.0414	25.5574	24.3173	25.6527	26.7696	25.0465	28.125	27.8403	25.1785	25.9949	26.2694	27.1194	27.4829	27.5733	28.2592	28.6296	27.6567	28.7725	24.8939	25.736	26.105	28.5778	28.249	29.2568	26.1851
	P23284	P23284	Peptidyl-prolyl cis-trans isomerase B	1	PPIB	sp|P23284|PPIB_HUMAN Peptidyl-prolyl cis-trans isomerase B OS=Homo sapiens OX=9606 GN=PPIB PE=1 SV=2	26.2312	25.792	25.5201	24.6923	25.0576	24.5	25.3831	25.9739	25.1844	25.1937	24.8807	24.0993	25.6917	26.0065	27.8476	27.2594	25.9563	25.8537	26.0028	25.2952	25.6209	26.4787	26.2446	26.1893	24.2456	26.0715	24.5842	26.4128	26.3252	25.5484	25.0913	25.3927	24.2824	25.0435	25.6194	25.7793	25.3306	25.9726	26.0217	24.6767	24.8817	23.089	26.4454
	Q9NNW5	Q9NNW5	WD repeat-containing protein 6	1	WDR6	sp|Q9NNW5|WDR6_HUMAN WD repeat-containing protein 6 OS=Homo sapiens OX=9606 GN=WDR6 PE=1 SV=1	26.2284	26.1786	26.3155	26.2882	26.5888	26.3867	27.0449	26.3736	27.1491	26.4653	26.5456	26.2007	25.9006	25.8574	26.166	26.4224	26.1498	26.2562	25.9673	26.1379	26.0683	26.1155	25.9416	25.6349	26.4696	25.4179	25.0805	26.8584	27.1759	27.2363	26.2795	26.3419	26.6664	26.5905	26.602	26.6717	26.7255	26.0536	26.747	26.5889	26.8683	24.7638	26.3971
	Q9Y237	Q9Y237	Peptidyl-prolyl cis-trans isomerase NIMA-interacting 4	1	PIN4	sp|Q9Y237|PIN4_HUMAN Peptidyl-prolyl cis-trans isomerase NIMA-interacting 4 OS=Homo sapiens OX=9606 GN=PIN4 PE=1 SV=1	26.2197	25.8675	25.9629	25.2622	23.7394	25.6565	26.2342	27.6053	25.7688	24.8395	24.6955	23.9469	27.0696	26.9337	26.1989	26.1667	26.611	26.5472	25.9675	26.471	26.5535	26.8413	26.4042	26.1568	24.9953	24.5938	27.276	26.0612	26.3349	26.0405	25.2915	25.9059	25.5891	25.5584	25.7255	26.6773	25.7588	26.5234	26.1996	24.9535	26.5718	25.9415	26.1301
	Q01130	Q01130	Serine/arginine-rich splicing factor 2	1	SRSF2	sp|Q01130|SRSF2_HUMAN Serine/arginine-rich splicing factor 2 OS=Homo sapiens OX=9606 GN=SRSF2 PE=1 SV=4	26.2157	25.396	25.6313	25.4311	26.0109	25.3809	26.0957	26.3817	25.5397	26.0766	26.344	25.5409	26.1453	26.8669	26.2441	25.8751	26.4148	26.0793	26.3988	26.5749	26.5304	26.4697	25.8955	25.8629	25.991	26.28	26.0617	25.934	26.0205	25.6517	27.204	26.838	26.2672	27.4812	27.2196	27.6302	25.1121	25.4573	25.4616	26.0794	25.9814	26.5943	26.0757
	Q13557	Q13557	Calcium/calmodulin-dependent protein kinase type II subunit delta	2	CAMK2D	sp|Q13557|KCC2D_HUMAN Calcium/calmodulin-dependent protein kinase type II subunit delta OS=Homo sapiens OX=9606 GN=CAMK2D PE=1 SV=3	26.2076	25.8928	26.2439	26.7007	26.208	26.5384	26.5853	25.3646	26.4699	26.3247	26.403	25.8037	25.3198	25.0801	25.7998	25.3705	25.5239	25.4494	25.7028	25.8551	25.5747	25.5619	25.4342	24.7455	26.1804	25.1597	23.7512	25.6813	25.5972	26.0614	26.1683	26.2671	26.3567	25.517	24.9779	24.7291	26.5599	24.7353	26.5958	26.4357	26.3893	25.6913	26.0896
	P01024	P01024	Complement C3;Complement C3 beta chain;C3-beta-c;Complement C3 alpha chain;C3a anaphylatoxin;Acylation stimulating protein;Complement C3b alpha chain;Complement C3c alpha chain fragment 1;Complement C3dg fragment;Complement C3g fragment;Complement C3d fragment;Complement C3f fragment;Complement C3c alpha chain fragment 2	1	C3	sp|P01024|CO3_HUMAN Complement C3 OS=Homo sapiens OX=9606 GN=C3 PE=1 SV=2	26.206	26.1522	26.2108	26.3422	26.6544	26.084	26.6979	27.673	26.6481	27.3632	27.0743	26.5178	27.6467	27.1581	26.7073	27.4359	27.2248	27.3475	26.4225	27.2623	26.8514	27.2574	27.0808	26.8683	27.0572	26.5899	27.2328	26.4919	27.1102	26.6815	27.3377	26.9823	26.7023	26.7927	26.6267	27.7182	25.9078	26.934	26.3259	26.9732	27.1536	27.0574	26.7291
	P62854	P62854;Q5JNZ5	40S ribosomal protein S26;Putative 40S ribosomal protein S26-like 1	2	RPS26	sp|P62854|RS26_HUMAN 40S ribosomal protein S26 OS=Homo sapiens OX=9606 GN=RPS26 PE=1 SV=3;sp|Q5JNZ5|RS26L_HUMAN Putative 40S ribosomal protein S26-like 1 OS=Homo sapiens OX=9606 GN=RPS26P11 PE=5 SV=1	26.206	25.3018	25.5524	25.7194	26.2649	26.1851	26.2328	26.4761	26.1732	24.8848	25.0503	25.6904	25.1071	25.3144	24.3789	26.5078	25.1868	25.7017	26.7049	27.2917	25.305	27.2557	26.9918	24.5873	26.5865	27.2773	23.3897	26.3462	25.5046	26.1778	27.0781	26.5349	25.8932	24.9719	26.1493	26.2765	24.4841	24.5377	26.1261	24.7459	25.0534	25.2389	24.1257
	P32119	P32119	Peroxiredoxin-2	1	PRDX2	sp|P32119|PRDX2_HUMAN Peroxiredoxin-2 OS=Homo sapiens OX=9606 GN=PRDX2 PE=1 SV=5	26.1911	25.789	25.9432	26.827	26.5361	26.8043	25.9933	26.09	26.4828	26.1198	26.3896	26.1345	25.8299	26.6082	25.8439	26.4738	26.0032	25.8574	26.1724	26.3747	26.2718	26.4633	26.2766	25.8766	26.1481	27.2237	25.2572	25.899	26.1839	26.3045	26.0929	26.0358	25.9457	25.7874	26.6802	26.5411	26.1103	25.537	26.693	26.4845	26.2116	24.6313	26.2683
	Q15029	Q15029	116 kDa U5 small nuclear ribonucleoprotein component	1	EFTUD2	sp|Q15029|U5S1_HUMAN 116 kDa U5 small nuclear ribonucleoprotein component OS=Homo sapiens OX=9606 GN=EFTUD2 PE=1 SV=1	26.189	25.8164	25.7686	25.984	26.2817	25.9342	25.991	26.3702	26.0594	25.659	25.8397	25.4741	26.1966	26.1981	26.7411	26.3655	26.1488	26.2287	29.1027	29.5513	29.3475	25.893	26.1879	25.5168	25.5791	25.6237	25.8101	26.365	26.4269	26.2114	25.8086	26.1213	25.8675	28.8248	28.7649	29.0949	25.9926	26.4663	26.0827	26.7514	26.4949	25.4469	26.5862
	O95429	O95429	BAG family molecular chaperone regulator 4	1	BAG4	sp|O95429|BAG4_HUMAN BAG family molecular chaperone regulator 4 OS=Homo sapiens OX=9606 GN=BAG4 PE=1 SV=1	26.1844	26.6449	26.5822	26.2898	25.7278	26.2782	25.6199	26.9382	25.8732	26.5348	26.0935	26.5517	26.8374	26.3965	26.3281	26.1877	26.8836	26.9092	26.2763	26.4685	26.7322	26.0187	25.5547	26.6462	26.5001	25.7661	27.3452	25.1877	25.1877	23.971	26.2105	26.5474	26.3824	26.0331	26.2143	26.3626	26.3177	27.4001	26.3192	26.2746	26.0766	26.6046	25.4009
	P32969	P32969	60S ribosomal protein L9	1	RPL9	sp|P32969|RL9_HUMAN 60S ribosomal protein L9 OS=Homo sapiens OX=9606 GN=RPL9 PE=1 SV=1	26.1759	26.2124	25.7719	25.8859	26.6378	25.9443	26.0718	26.7588	26.5936	26.0721	26.2383	25.9877	26.7073	26.5464	26.5179	25.5448	26.0865	26.161	26.6239	26.5245	27.1369	26.5557	26.7356	26.4488	26.5766	26.3226	25.7023	26.5355	26.4354	26.7866	26.1415	26.6923	25.8166	25.9303	25.9202	26.3817	26.1613	26.1412	26.4036	26.0596	25.9829	24.478	26.5262
	O75494	O75494	Serine/arginine-rich splicing factor 10	1	SRSF10	sp|O75494|SRS10_HUMAN Serine/arginine-rich splicing factor 10 OS=Homo sapiens OX=9606 GN=SRSF10 PE=1 SV=1	26.1743	25.2127	25.4549	25.0069	25.5458	24.7585	25.04	25.5446	25.5904	25.2875	25.5135	25.931	26.4656	26.4543	26.7307	26.5872	25.8446	26.0192	25.4009	25.113	25.8748	25.5882	25.9376	25.7389	25.2411	24.9914	26.11	26.7186	26.5133	26.8301	25.1257	25.7684	25.3615	26.43	26.9422	27.3265	23.6292	26.3209	25.59	25.3457	24.5255	25.0344	26.4656
	Q9Y2X3	Q9Y2X3	Nucleolar protein 58	1	NOP58	sp|Q9Y2X3|NOP58_HUMAN Nucleolar protein 58 OS=Homo sapiens OX=9606 GN=NOP58 PE=1 SV=1	26.1713	25.2163	25.3202	24.245	24.4063	24.4517	24.6734	24.8137	24.6605	24.5819	24.5258	24.1282	25.3596	24.8828	26.6788	26.2027	25.1946	25.8593	25.783	25.721	25.979	26.1668	26.6129	25.8647	24.4764	24.1219	24.5742	26.0335	25.7359	25.4731	24.8982	25.1628	24.4786	24.556	24.378	24.0032	25.2244	26.0487	25.2088	24.0868	24.2249	24.847	26.0118
	P29692	P29692	Elongation factor 1-delta	1	EEF1D	sp|P29692|EF1D_HUMAN Elongation factor 1-delta OS=Homo sapiens OX=9606 GN=EEF1D PE=1 SV=5	26.1687	26.3638	26.2558	26.629	26.6054	26.9328	26.3877	25.4286	26.4597	26.2497	26.2449	26.1512	25.6091	25.8898	25.3123	26.1457	25.6433	25.8886	26.1109	25.785	25.9785	26.1072	25.5565	25.6701	26.7465	27.4908	25.7301	26.2635	25.8601	26.1355	26.8833	26.4114	26.1731	26.0079	25.9457	25.6713	26.7629	24.0264	26.5045	26.39	26.4163	26.6875	26.2371
	P67809	P67809	Nuclease-sensitive element-binding protein 1	1	YBX1	sp|P67809|YBOX1_HUMAN Nuclease-sensitive element-binding protein 1 OS=Homo sapiens OX=9606 GN=YBX1 PE=1 SV=3	26.1583	26.336	26.2914	26.2945	26.5828	26.4022	25.9591	26.9045	26.0247	27.0465	26.645	26.4336	27.5001	27.2688	26.7907	27.4832	27.0112	26.7142	26.4251	26.8516	26.8238	27.0627	26.8875	26.9884	26.7864	26.6345	27.4018	26.4339	26.5922	26.3035	26.9771	26.5444	26.888	26.4964	26.5575	27.1281	26.1021	27.085	26.1068	26.6562	26.3413	27.3946	26.6007
	P62277	P62277	40S ribosomal protein S13	1	RPS13	sp|P62277|RS13_HUMAN 40S ribosomal protein S13 OS=Homo sapiens OX=9606 GN=RPS13 PE=1 SV=2	26.1443	25.8329	26.0578	26.517	26.7079	26.7031	26.908	27.4772	27.3109	27.434	26.9676	26.2895	27.3481	26.637	26.3468	27.1505	26.5835	26.7532	26.9786	27.2369	27.2687	27.2499	27.1093	26.9076	26.7142	26.6431	27.0598	26.4303	27.1492	26.9277	27.1283	26.4886	26.7801	27.0753	26.7956	27.0224	25.9512	26.0971	27.0069	26.8602	26.5676	26.3156	26.946
	P48643	P48643	T-complex protein 1 subunit epsilon	1	CCT5	sp|P48643|TCPE_HUMAN T-complex protein 1 subunit epsilon OS=Homo sapiens OX=9606 GN=CCT5 PE=1 SV=1	26.1405	26.0487	25.8541	26.4917	26.312	26.5173	26.2129	25.5725	26.2441	25.6041	26.0575	25.7341	24.8368	25.9259	25.8018	25.485	25.3368	25.428	26.0644	25.7085	26.0795	25.6646	25.3904	25.5866	25.2273	25.8551	24.5207	26.2061	26.1577	26.4907	25.5645	25.6858	25.7486	25.4515	25.2984	25.2345	26.6384	25.4521	26.4394	25.8316	25.9397	25.2355	26.0945
	P60174	P60174	Triosephosphate isomerase	1	TPI1	sp|P60174|TPIS_HUMAN Triosephosphate isomerase OS=Homo sapiens OX=9606 GN=TPI1 PE=1 SV=3	26.1358	25.4353	25.5444	26.2031	26.9896	25.8931	26.2047	26.4709	26.5732	26.8548	26.5702	25.9322	26.101	27.1176	25.163	26.491	26.3192	26.7269	25.2734	25.664	26.2032	27.2539	25.8134	25.3438	25.9704	28.2646	25.6831	25.7646	26.5635	26.3293	26.7117	25.6956	25.4083	27.2468	26.7244	26.5836	25.1752	24.0318	26.6585	25.9718	26.0947	26.8851	25.3799
	Q96KG9	Q96KG9	N-terminal kinase-like protein	1	SCYL1	sp|Q96KG9|SCYL1_HUMAN N-terminal kinase-like protein OS=Homo sapiens OX=9606 GN=SCYL1 PE=1 SV=1	26.1354	24.8931	26.2455	25.112	25.9694	25.4027	25.8036	25.3132	25.8164	25.0985	25.3374	25.3444	25.1225	25.5286	25.9385	24.0133	25.6838	25.6116	25.8734	25.5224	25.8201	25.6003	25.8116	25.9864	25.1407	25.2553	24.8178	25.6829	24.3846	25.7468	24.4486	25.3597	25.4005	25.4878	25.6218	25.8461	25.6269	25.9699	26.111	25.3791	25.4062	25.45	25.5718
	P18754	P18754	Regulator of chromosome condensation	1	RCC1	sp|P18754|RCC1_HUMAN Regulator of chromosome condensation OS=Homo sapiens OX=9606 GN=RCC1 PE=1 SV=1	26.116	25.5882	25.5839	24.6888	25.2116	24.4114	24.8578	24.9047	24.77	24.3331	24.8884	25.0038	26.0642	26.4766	27.0521	25.1728	24.7716	25.2026	25.5539	24.932	25.673	25.4256	25.5671	25.5859	24.2912	24.2117	24.6524	25.6965	25.3462	25.4383	24.0987	25.0949	24.8874	24.9568	25.085	24.6925	25.3991	25.5384	25.3144	24.3047	24.4985	24.9579	25.4733
	P35249	P35249	Replication factor C subunit 4	1	RFC4	sp|P35249|RFC4_HUMAN Replication factor C subunit 4 OS=Homo sapiens OX=9606 GN=RFC4 PE=1 SV=2	26.1107	26.3026	25.8073	25.6169	26.1703	26.1422	26.0165	27.0037	26.0981	26.4668	26.2491	26.5661	27.0266	26.6584	26.4385	27.6521	26.7554	26.9852	25.7609	26.4302	26.2425	26.4978	26.4545	26.582	26.2683	26.2676	26.6858	25.9203	26.6784	26.543	25.7329	25.6149	26.103	26.3871	26.9252	26.7965	25.7669	26.8754	26.3163	26.3307	26.4046	26.0778	26.7714
	P54132	P54132	Bloom syndrome protein	1	BLM	sp|P54132|BLM_HUMAN Bloom syndrome protein OS=Homo sapiens OX=9606 GN=BLM PE=1 SV=1	26.0985	26.2377	25.9402	25.367	25.5481	25.178	25.6483	26.5382	25.6375	26.1225	25.8141	25.855	26.0145	26.0751	25.6361	25.9328	26.3701	26.2362	25.7299	25.912	25.8687	25.8898	26.1118	26.0466	26.2753	25.3803	26.8546	25.8815	26.1199	25.8117	26.1009	25.624	25.8496	25.613	25.8306	26.1589	25.5945	26.687	25.674	25.5503	25.3463	24.7217	25.6123
	P46939	P46939	Utrophin	1	UTRN	sp|P46939|UTRO_HUMAN Utrophin OS=Homo sapiens OX=9606 GN=UTRN PE=1 SV=2	26.0968	26.1623	26.9765	26.9059	26.8511	27.7159	26.8691	25.9813	26.5796	27.0987	27.4843	26.7628	25.7125	26.2427	26.4945	26.7851	26.3205	26.1378	25.4043	26.0512	26.3916	25.4773	25.9405	26.0978	26.8519	25.516	26.1106	26.679	26.0691	26.283	27.3439	26.0333	27.3087	26.3453	26.4154	27.7553	27.1208	27.3359	27.0546	27.2438	26.8184	27.3941	25.7785
	P61160	P61160	Actin-related protein 2	1	ACTR2	sp|P61160|ARP2_HUMAN Actin-related protein 2 OS=Homo sapiens OX=9606 GN=ACTR2 PE=1 SV=1	26.0948	26.1452	26.0129	25.5735	24.4334	25.7455	26.3143	25.3939	26.327	24.8953	25.5695	24.878	24.222	24.9183	24.5062	25.1391	25.092	24.9388	25.4491	25.4978	25.3557	25.5796	25.4788	25.3266	25.5034	25.8241	23.7069	25.5415	24.9887	25.7349	25.3691	25.1783	25.517	24.4809	24.3726	23.8969	26.5032	24.6645	26.4578	25.1723	25.0741	24.5423	25.9722
	Q13435	Q13435	Splicing factor 3B subunit 2	1	SF3B2	sp|Q13435|SF3B2_HUMAN Splicing factor 3B subunit 2 OS=Homo sapiens OX=9606 GN=SF3B2 PE=1 SV=2	26.0941	25.5235	25.7895	25.3584	25.607	25.0746	25.6888	25.8241	25.5526	25.4959	25.4124	25.119	26.1171	25.7859	26.4389	26.0745	25.9271	25.9448	25.6899	25.6477	25.7283	25.8593	26.1332	25.8894	25.0428	25.0718	25.8201	26.1392	25.9125	25.8162	25.3406	26.1128	25.2327	25.8344	25.7373	25.794	25.4007	26.1067	25.8842	25.0458	25.1577	26.5279	26.3805
	O60784	O60784	Target of Myb protein 1	1	TOM1	sp|O60784|TOM1_HUMAN Target of Myb protein 1 OS=Homo sapiens OX=9606 GN=TOM1 PE=1 SV=2	26.0898	26.3575	26.2685	25.6523	25.5866	25.6108	26.5961	25.4443	26.8142	25.1728	24.9556	24.8508	24.0697	24.1706	25.44	25.0945	24.5938	24.4914	25.8425	25.5281	25.7613	24.9299	24.9441	25.0633	25.1816	24.4455	22.1048	25.3542	24.5357	25.8116	25.3144	25.2807	25.4374	23.6777	23.5144	22.1107	26.5085	24.2658	26.7459	25.7325	25.3936	25.729	25.4091
	P17480	P17480	Nucleolar transcription factor 1	1	UBTF	sp|P17480|UBF1_HUMAN Nucleolar transcription factor 1 OS=Homo sapiens OX=9606 GN=UBTF PE=1 SV=1	26.0875	25.4882	26.007	24.8185	25.1393	24.8057	25.0384	25.6184	25.375	25.8954	25.6166	24.699	28.0051	27.4122	27.1392	26.5329	25.9214	26.0019	25.0653	25.6263	24.8261	26.4651	26.6765	25.8658	25.8826	25.3888	26.4655	26.6196	27.1404	26.8744	26.0444	25.8029	25.474	26.9661	27.0218	27.1692	25.1682	25.9723	26.011	25.3827	25.4372	24.5854	27.3169
	Q9NQ38	Q9NQ38	Serine protease inhibitor Kazal-type 5;Hemofiltrate peptide HF6478;Hemofiltrate peptide HF7665	1	SPINK5	sp|Q9NQ38|ISK5_HUMAN Serine protease inhibitor Kazal-type 5 OS=Homo sapiens OX=9606 GN=SPINK5 PE=1 SV=2	26.0859	24.6984	24.4409	26.3446	26.1714	25.8572	23.6446	24.0352	24.0786	24.7607	25.573	25.7652	25.5809	24.517	24.0696	23.9459	22.1561	23.8344	24.2753	23.9195	24.0911	25.699	24.1788	24.4541	26.2238	27.4784	25.4361	24.4195	24.2765	24.9804	26.4248	25.6996	26.0284	26.2416	25.5127	25.3973	21.326	23.7543	24.0256	26.4201	26.334	25.6347	23.847
	Q09028	Q09028	Histone-binding protein RBBP4	1	RBBP4	sp|Q09028|RBBP4_HUMAN Histone-binding protein RBBP4 OS=Homo sapiens OX=9606 GN=RBBP4 PE=1 SV=3	26.0855	26.2135	26.2753	24.54	24.3679	24.2917	25.4821	25.3029	24.6514	23.9856	24.3547	23.8632	25.5121	25.821	25.9206	25.8877	26.1924	25.932	25.9744	24.8952	24.7971	25.6269	26.108	26.5624	25.3949	24.5674	25.0338	25.5403	25.3099	24.69	25.8652	25.82	24.9141	25.7188	25.7826	25.7253	25.9268	26.4133	25.4952	25.3971	24.7508	25.5647	25.8084
	Q96T88	Q96T88	E3 ubiquitin-protein ligase UHRF1	1	UHRF1	sp|Q96T88|UHRF1_HUMAN E3 ubiquitin-protein ligase UHRF1 OS=Homo sapiens OX=9606 GN=UHRF1 PE=1 SV=1	26.0826	26.1531	26.0423	25.4943	25.3851	25.3393	25.3771	26.3229	25.5375	26.1728	25.668	25.673	26.6231	26.1319	25.9336	26.6079	26.5076	26.5849	25.8045	26.1122	26.0447	26.1842	26.2566	26.0827	25.8039	25.2981	26.2952	25.8394	26.0499	25.995	25.4913	25.8485	25.6863	25.8496	25.7351	26.0876	25.6426	26.6946	25.9473	25.7084	25.5382	25.7768	26.2499
	Q9H165	Q9H165	B-cell lymphoma/leukemia 11A	1	BCL11A	sp|Q9H165|BC11A_HUMAN B-cell lymphoma/leukemia 11A OS=Homo sapiens OX=9606 GN=BCL11A PE=1 SV=2	26.0811	25.2508	25.2979	24.9883	25.374	25.0685	24.9875	25.3585	24.8979	25.1778	25.1796	25.273	25.907	25.6055	25.1861	25.7391	25.5627	25.9692	25.0369	25.0427	24.9572	25.2355	25.2266	25.1858	25.3716	24.8676	25.5174	25.1021	25.2235	25.28	25.4105	25.3721	25.3306	25.3804	25.5213	25.5927	25.2302	25.5038	23.3527	25.3248	25.0477	24.5197	25.34
	P35749	P35749	Myosin-11	1	MYH11	sp|P35749|MYH11_HUMAN Myosin-11 OS=Homo sapiens OX=9606 GN=MYH11 PE=1 SV=3	26.0801	26.1908	26.1483	25.2911	25.4729	25.2646	25.778	26.0731	26.0185	25.5127	25.246	25.0948	26.6838	26.3289	25.9646	25.7131	26.5075	26.5372	25.8944	25.7022	25.8935	25.78	25.7879	26.0704	24.9755	25.1473	24.6331	25.6498	26.5929	25.4234	25.2982	25.2342	25.7419	25.3414	25.1731	25.2531	26.6064	26.5015	25.6877	25.3232	25.2507	24.3765	25.971
	Q14011	Q14011	Cold-inducible RNA-binding protein	1	CIRBP	sp|Q14011|CIRBP_HUMAN Cold-inducible RNA-binding protein OS=Homo sapiens OX=9606 GN=CIRBP PE=1 SV=1	26.0753	26.7951	26.1819	26.6866	26.7997	26.8077	26.4438	26.6633	26.0636	26.4256	26.6512	26.8579	27.125	27.1946	27.1693	26.0565	27.0053	26.668	27.1232	26.6543	27.4794	26.4175	26.9608	27.2275	27.5812	26.4478	28.2597	26.7419	26.8563	26.3737	26.7712	26.8887	26.8886	26.1301	26.9913	28.0661	26.2823	27.3929	25.668	26.2437	26.8257	27.6256	26.4644
	P08621	P08621	U1 small nuclear ribonucleoprotein 70 kDa	1	SNRNP70	sp|P08621|RU17_HUMAN U1 small nuclear ribonucleoprotein 70 kDa OS=Homo sapiens OX=9606 GN=SNRNP70 PE=1 SV=2	26.074	26.1104	25.9147	26.3156	26.6162	26.3705	25.6934	26.3079	25.7851	26.1318	26.3011	26.8134	25.6123	25.7671	25.5221	25.3338	25.7965	25.6093	26.1308	25.8191	26.0865	25.4338	25.4639	25.6255	26.334	26.2375	27.237	26.0659	26.2919	25.8058	26.7385	26.7046	26.8099	25.8593	26.3319	26.4137	25.5556	26.205	25.5489	25.6906	25.8395	26.1069	25.0124
	P36543	P36543	V-type proton ATPase subunit E 1	1	ATP6V1E1	sp|P36543|VATE1_HUMAN V-type proton ATPase subunit E 1 OS=Homo sapiens OX=9606 GN=ATP6V1E1 PE=1 SV=1	26.068	25.8411	26.0172	25.9027	27.4455	28.5821	25.9914	25.6085	25.8706	28.2534	25.2113	27.2274	25.5868	26.0399	25.6883	24.4594	25.6794	25.5959	25.8458	25.7603	25.9738	25.9561	26.038	25.5398	21.8028	27.1952	24.9409	25.8412	25.567	25.8375	25.3299	25.2658	25.9841	25.298	24.6748	24.9693	26.1444	25.1842	26.1582	28.4275	24.8163	25.7153	26.1911
	Q9UKM9	Q9UKM9	RNA-binding protein Raly	1	RALY	sp|Q9UKM9|RALY_HUMAN RNA-binding protein Raly OS=Homo sapiens OX=9606 GN=RALY PE=1 SV=1	26.0647	25.3571	25.523	25.7052	26.2197	26.2285	24.988	26.0631	25.2321	26.3544	25.9649	25.2059	26.9576	26.632	27.146	26.3283	26.1677	26.1954	25.361	25.2312	25.217	25.3421	26.1965	25.0492	25.4535	25.5482	26.1386	25.8042	25.862	25.7703	26.6292	26.9919	26.3746	26.6238	26.5236	26.6141	24.9507	26.6064	25.824	25.7274	25.6748	26.649	26.8148
	O15160	O15160	DNA-directed RNA polymerases I and III subunit RPAC1	1	POLR1C	sp|O15160|RPAC1_HUMAN DNA-directed RNA polymerases I and III subunit RPAC1 OS=Homo sapiens OX=9606 GN=POLR1C PE=1 SV=1	26.0623	25.8486	26.0225	25.1094	25.3469	24.6181	25.7718	26.1856	25.8356	25.2381	25.1543	25.093	25.6608	25.9741	25.834	25.7957	26.1953	26.1513	25.9967	25.8283	26.2572	25.8524	25.7925	25.8648	25.2773	24.5489	25.6801	25.285	25.5004	25.2961	25.4931	24.7333	25.2377	25.2062	25.4738	25.4843	25.9852	26.5504	25.7738	25.5329	25.2421	25.2331	25.2867
	Q14151	Q14151	Scaffold attachment factor B2	1	SAFB2	sp|Q14151|SAFB2_HUMAN Scaffold attachment factor B2 OS=Homo sapiens OX=9606 GN=SAFB2 PE=1 SV=1	26.0554	25.9633	25.5872	25.3008	25.5723	25.3647	25.3743	26.156	25.2266	26.0558	25.6305	25.7951	27.0558	26.6657	26.7396	26.2257	26.5698	26.5428	25.124	25.2597	25.0537	25.5127	25.9675	25.9057	26.2533	25.6429	26.9039	26.2042	26.6161	25.9053	26.0245	26.0807	25.9927	26.7784	27.1612	27.4358	25.2527	26.7505	25.5759	25.315	25.4187	26.3685	26.3231
	P13797	P13797	Plastin-3	2	PLS3	sp|P13797|PLST_HUMAN Plastin-3 OS=Homo sapiens OX=9606 GN=PLS3 PE=1 SV=4	26.0546	25.796	25.739	24.9969	24.9317	24.9788	25.9561	25.4495	26.0102	24.9263	24.8212	24.4475	25.1311	26.0397	25.6357	25.3504	25.4655	25.5211	25.497	25.4492	25.7237	26.1519	25.7042	25.5095	24.5881	26.328	24.3517	25.9441	25.7472	25.9342	24.6207	24.5362	24.628	25.0272	25.082	24.8317	26.2683	24.9225	26.0734	24.8935	24.8753	25.9245	25.6681
	P62857	P62857	40S ribosomal protein S28	1	RPS28	sp|P62857|RS28_HUMAN 40S ribosomal protein S28 OS=Homo sapiens OX=9606 GN=RPS28 PE=1 SV=1	26.0507	26.3269	26.3214	25.9568	26.1671	26.261	25.9429	26.2803	25.9336	25.1943	25.5109	26.3488	26.0532	26.3579	26.0374	26.0357	26.2295	26.1235	26.569	26.3506	26.6784	26.6707	26.7793	26.928	26.0213	27.1852	26.9796	26.5065	26.3102	26.3177	25.9046	25.8193	26.0811	25.7784	26.2881	26.3812	26.1951	26.167	25.9207	26.0037	25.7191	24.8769	25.9052
	P45880	P45880	Voltage-dependent anion-selective channel protein 2	1	VDAC2	sp|P45880|VDAC2_HUMAN Voltage-dependent anion-selective channel protein 2 OS=Homo sapiens OX=9606 GN=VDAC2 PE=1 SV=2	26.05	25.8851	26.0134	26.3595	26.1402	26.0431	25.6197	25.659	25.7637	25.8273	25.9652	25.8439	25.9924	26.1363	25.5312	25.8766	25.8781	26.2536	25.4509	25.2211	25.8955	26.6812	26.4705	26.64	25.4369	25.936	25.7645	25.9881	26.2405	26.3674	26.1268	25.7579	25.9789	26.5192	26.5221	26.651	25.9434	25.6207	26.1621	25.7995	25.8221	25.9685	25.6488
	P62191	P62191	26S protease regulatory subunit 4	1	PSMC1	sp|P62191|PRS4_HUMAN 26S proteasome regulatory subunit 4 OS=Homo sapiens OX=9606 GN=PSMC1 PE=1 SV=1	26.0474	26.3474	25.7148	25.9311	25.8251	25.7529	27.1476	25.6695	26.0499	25.6264	25.8165	26.4289	26.6088	25.1597	25.299	26.1344	25.4192	25.7148	26.1889	25.9469	26.4181	25.8357	25.2672	24.4128	24.9758	27.1821	24.9388	25.9354	25.8506	26.2738	25.9523	25.9919	25.3936	25.3051	24.9678	24.3392	26.2978	24.9393	26.9258	25.1271	26.313	26.4484	26.0356
	Q13283	Q13283	Ras GTPase-activating protein-binding protein 1	1	G3BP1	sp|Q13283|G3BP1_HUMAN Ras GTPase-activating protein-binding protein 1 OS=Homo sapiens OX=9606 GN=G3BP1 PE=1 SV=1	26.043	26.3206	25.9337	26.0758	26.5092	26.2735	25.8009	26.7674	26.3114	26.1884	26.1481	26.1609	25.9804	26.0337	25.6089	26.8182	26.8754	26.7099	26.3628	26.3114	26.4705	26.011	25.9639	26.1482	25.9716	26.2501	26.5319	26.7193	26.6569	26.5423	26.4589	26.2916	26.293	25.527	26.5799	26.7466	26.0541	25.8887	26.1623	25.8264	25.8844	26.5585	26.1252
	P12004	P12004	Proliferating cell nuclear antigen	1	PCNA	sp|P12004|PCNA_HUMAN Proliferating cell nuclear antigen OS=Homo sapiens OX=9606 GN=PCNA PE=1 SV=1	26.0414	25.6681	25.4871	25.7361	26.3482	25.2618	25.123	25.1843	24.9756	25.9589	24.7852	25.9249	25.5265	25.9465	25.4215	25.4674	25.7996	25.719	25.1458	25.1361	25.3725	26.0338	25.8095	25.8132	25.7057	24.8495	25.6034	25.4762	25.2387	25.474	26.1274	25.4741	25.1367	25.6777	25.9455	25.789	25.4376	25.7514	25.1278	25.2159	25.0816	25.612	26.1477
	P28290	P28290	Sperm-specific antigen 2	1	SSFA2	sp|P28290|ITPI2_HUMAN Protein ITPRID2 OS=Homo sapiens OX=9606 GN=ITPRID2 PE=1 SV=3	26.0362	26.4442	26.4571	26.5629	26.0391	26.3837	26.4467	25.2743	26.1536	26.1545	26.3202	26.0205	24.4897	24.3584	25.3009	25.4012	25.28	25.0838	25.744	25.3577	25.5443	24.9853	25.0005	25.2187	26.7056	24.8939	24.1726	25.1163	24.3411	24.9073	26.4146	26.2211	26.6299	24.2875	23.9263	22.2984	26.6481	23.8943	26.0684	26.5822	26.6748	27.3004	24.984
	P09429	P09429	High mobility group protein B1	1	HMGB1	sp|P09429|HMGB1_HUMAN High mobility group protein B1 OS=Homo sapiens OX=9606 GN=HMGB1 PE=1 SV=3	26.0353	26.1928	26.0223	26.4635	27.1225	25.9486	26.6259	27.3898	26.4301	28.0939	27.4802	26.9776	26.9812	26.8801	26.3127	26.7023	26.4405	26.9281	26.3234	26.4283	26.6683	26.7894	26.4612	26.2435	26.5823	26.9099	27.8822	26.0143	26.2277	26.2332	27.5601	26.7061	26.7389	27.5233	27.3322	27.4866	26.1238	26.3205	27.0363	25.7682	26.8201	25.947	26.5931
	O75955	O75955	Flotillin-1	1	FLOT1	sp|O75955|FLOT1_HUMAN Flotillin-1 OS=Homo sapiens OX=9606 GN=FLOT1 PE=1 SV=3	26.0312	26.1034	26.2006	25.4904	25.3901	25.6312	25.2194	24.9769	25.4913	25.4928	25.3509	25.5368	24.6014	24.4102	24.9472	25.3445	24.6823	24.6278	24.3836	24.6313	24.757	24.1371	24.4253	24.1818	25.0982	24.3608	24.7095	24.3136	23.5407	24.7028	25.9488	25.5046	25.8735	24.2989	24.5157	24.6217	25.7737	25.2567	25.8419	25.3166	25.4955	26.0221	24.7676
	P05549	P05549	Transcription factor AP-2-alpha	2	TFAP2A	sp|P05549|AP2A_HUMAN Transcription factor AP-2-alpha OS=Homo sapiens OX=9606 GN=TFAP2A PE=1 SV=1	26.0299	26.0782	26.0839	26.1897	26.5953	26.2098	25.0054	26.0142	25.4574	26.3194	25.8205	26.2834	26.5968	26.3049	25.9655	25.9743	26.1262	26.0455	25.1218	25.4441	25.2669	25.4855	25.5875	24.8818	26.7617	26.5209	26.5725	25.4433	25.4775	25.1665	26.438	26.1439	25.831	25.5382	25.4723	25.7862	25.2584	26.178	25.4909	25.8339	24.9482	24.0209	26.3081
	Q07157	Q07157	Tight junction protein ZO-1	1	TJP1	sp|Q07157|ZO1_HUMAN Tight junction protein ZO-1 OS=Homo sapiens OX=9606 GN=TJP1 PE=1 SV=3	26.0299	26.3973	26.5073	26.7418	26.2049	26.6562	26.1904	25.3979	26.0877	25.9548	26.252	26.1407	25.0974	24.8377	25.5006	25.9134	25.7528	25.5412	25.8181	25.7631	25.5691	25.435	25.7389	25.542	26.4678	26.0085	25.3889	25.7188	25.2365	25.7013	25.9979	26.2742	26.2531	25.538	25.3964	24.7237	26.2996	25.0057	26.0219	26.4491	26.411	26.2943	25.8163
	Q00325	Q00325	Phosphate carrier protein, mitochondrial	1	SLC25A3	sp|Q00325|MPCP_HUMAN Phosphate carrier protein, mitochondrial OS=Homo sapiens OX=9606 GN=SLC25A3 PE=1 SV=2	26.0212	25.9675	25.8414	26.7466	26.024	25.4413	25.2606	24.8245	25.0799	25.1717	25.1536	25.8224	25.3725	25.9849	25.4553	25.2337	25.945	25.5427	24.8628	25.1918	25.5956	25.9586	25.6165	25.9262	25.1463	25.6948	26.09	25.7873	25.6401	25.556	25.2843	25.124	25.5104	25.7678	26.356	26.0862	25.6971	26.0346	25.2805	25.757	25.6978	24.8363	26.1737
	Q16630	Q16630	Cleavage and polyadenylation specificity factor subunit 6	1	CPSF6	sp|Q16630|CPSF6_HUMAN Cleavage and polyadenylation specificity factor subunit 6 OS=Homo sapiens OX=9606 GN=CPSF6 PE=1 SV=2	26.0163	25.0328	25.6174	25.4395	25.5572	25.8446	26.6686	27.155	25.8806	25.0453	24.3058	25.8189	25.2913	25.8946	25.2749	25.9443	25.9733	26.7406	26.2614	26.532	26.3291	25.7614	25.3623	25.2552	25.2908	25.9845	26.4234	25.5832	26.1097	25.9215	26.2007	25.3431	24.9242	24.6306	23.5753	24.687	25.3591	25.9313	25.0061	23.8522	25.1661	25.2106	24.8107
	P35250	P35250	Replication factor C subunit 2	1	RFC2	sp|P35250|RFC2_HUMAN Replication factor C subunit 2 OS=Homo sapiens OX=9606 GN=RFC2 PE=1 SV=3	26.0149	25.5197	25.7716	25.5008	25.9227	25.721	26.1075	27.1462	26.6206	27.1208	26.6607	25.6442	27.2367	26.471	26.1497	27.4322	26.9051	27.2647	25.9436	26.7638	26.1191	26.7057	26.5274	25.4285	26.4754	25.5569	25.4914	26.2282	27.0113	26.5797	26.7806	25.9852	26.0997	26.6964	26.4564	26.9589	25.4299	26.3828	26.7609	26.1853	25.841	23.6121	26.8018
	Q6ZU65	Q6ZU65	Ubinuclein-2	1	UBN2	sp|Q6ZU65|UBN2_HUMAN Ubinuclein-2 OS=Homo sapiens OX=9606 GN=UBN2 PE=1 SV=2	26.0097	26.0689	25.9476	23.7792	24.52	23.8505	24.4897	25.2127	23.9728	25.4087	25.0856	25.0809	25.6606	25.6053	25.2211	25.2727	25.7051	25.6495	24.6223	25.1104	24.9625	24.224	24.4612	24.5543	25.4449	24.9714	26.4257	24.3802	24.4917	24.1915	25.1011	25.1032	24.9859	24.5578	25.1046	25.0367	25.037	25.8676	24.9957	24.4198	24.3664	25.1129	24.747
	P46783	P46783	40S ribosomal protein S10	2	RPS10	sp|P46783|RS10_HUMAN 40S ribosomal protein S10 OS=Homo sapiens OX=9606 GN=RPS10 PE=1 SV=1	26.0082	26.2685	25.7617	25.6479	25.896	25.9808	25.3301	26.258	26.0132	25.3458	26.2973	25.4734	25.7682	26.3559	25.5432	26.3737	25.9294	25.9344	26.7664	26.3302	27.0362	26.5851	26.666	26.9201	25.9978	26.9949	25.9802	25.7747	26.0872	26.1602	25.7705	25.6506	25.3844	25.8619	26.3386	26.1955	26.421	25.91	26.2103	25.9738	26.1083	25.3286	26.2782
	Q3ZCU0	Q3ZCU0	Putative uncharacterized protein FLJ37770	1	Q3ZCU0	sp|Q3ZCU0|GVQW3_HUMAN Protein GVQW3 OS=Homo sapiens OX=9606 GN=GVQW3 PE=2 SV=1	26.002	25.9867	25.8759	24.7838	25.22	24.9118	25.7204	25.9076	26.209	25.2361	24.8884	25.1021	25.8867	26.3005	25.9936	26.7797	24.5159	26.2181	26.0041	26.3531	26.3797	24.8025	26.322	26.1357	25.1556	25.0285	25.5627	25.705	23.9224	25.7975	25.2801	25.2322	25.0423	25.3329	25.4382	25.4078	25.5509	26.44	25.645	24.0296	23.2689	25.1332	25.8278
	O14529	O14529	Homeobox protein cut-like 2	1	CUX2	sp|O14529|CUX2_HUMAN Homeobox protein cut-like 2 OS=Homo sapiens OX=9606 GN=CUX2 PE=1 SV=4	25.9905	25.7307	25.8142	26.3653	26.8176	26.3719	25.3956	26.0941	24.9285	26.2803	27.0787	27.5076	26.5064	26.5729	26.0758	25.6833	26.4971	26.8901	24.9491	25.1011	24.5889	25.1546	25.6331	25.3335	27.6544	26.7666	27.1257	26.1069	26.237	25.6402	26.5393	25.2116	27.0258	27.1281	28.2755	28.3985	24.7337	26.3262	25.402	27.2843	25.9343	25.2686	26.1166
	Q8WWM7	Q8WWM7	Ataxin-2-like protein	1	ATXN2L	sp|Q8WWM7|ATX2L_HUMAN Ataxin-2-like protein OS=Homo sapiens OX=9606 GN=ATXN2L PE=1 SV=2	25.9867	26.2072	26.1768	25.4386	25.5978	25.4662	26.194	26.7821	26.0997	26.0343	25.0625	25.8737	25.2423	25.2557	24.6959	28.6918	28.9051	28.8561	25.3773	25.3495	25.4643	25.0233	24.8823	25.001	25.6514	24.8227	26.4491	26.4539	26.5836	26.3368	25.9047	25.7331	25.9638	25.6592	26.4086	26.6694	25.6054	26.2025	25.451	25.4732	25.5513	25.8743	26.191
	P46013	P46013	Antigen KI-67	1	MKI67	sp|P46013|KI67_HUMAN Proliferation marker protein Ki-67 OS=Homo sapiens OX=9606 GN=MKI67 PE=1 SV=2	25.9796	25.4057	25.4079	25.4717	25.9696	25.5757	24.2471	24.7551	24.5624	25.3186	25.9854	25.7046	25.8677	25.6686	26.6349	26.1683	25.8487	25.9234	25.5599	25.3033	25.3558	25.8406	26.3457	25.728	25.8423	25.0799	26.476	25.962	25.5521	25.2044	26.2062	26.3941	25.982	26.259	25.7455	25.945	25.3727	26.2732	25.2848	25.4911	26.0334	25.9978	25.9826
	Q92522	Q92522	Histone H1x	1	H1FX	sp|Q92522|H1X_HUMAN Histone H1x OS=Homo sapiens OX=9606 GN=H1FX PE=1 SV=1	25.9757	25.443	24.7938	24.219	25.5338	24.5659	24.4085	24.7	25.0184	25.0739	25.3144	26.0681	25.7665	25.601	24.8519	25.3886	24.5971	25.0115	25.4629	25.6652	26.3695	25.3536	25.332	25.7723	25.6925	25.572	26.944	24.7429	24.6847	23.9804	26.2914	25.7725	25.8657	25.6358	25.8852	26.637	24.1402	25.706	24.3604	24.7284	25.7163	27.2376	23.4178
	Q5BKZ1	Q5BKZ1	DBIRD complex subunit ZNF326	1	ZNF326	sp|Q5BKZ1|ZN326_HUMAN DBIRD complex subunit ZNF326 OS=Homo sapiens OX=9606 GN=ZNF326 PE=1 SV=2	25.9745	25.8215	25.8993	25.2285	25.6364	25.1486	25.5263	26.3003	25.5195	25.8996	25.595	25.2755	26.2268	26.0305	26.4119	26.2568	26.5456	26.4004	25.3975	25.4331	25.2833	25.4562	26.1676	25.5328	25.8447	25.136	26.4513	26.4675	26.597	26.305	26.1105	25.9055	25.4439	26.1479	25.8793	25.9691	25.0374	26.3186	25.2162	25.4761	25.2189	25.5508	25.9872
	P13987	P13987	CD59 glycoprotein	1	CD59	sp|P13987|CD59_HUMAN CD59 glycoprotein OS=Homo sapiens OX=9606 GN=CD59 PE=1 SV=1	25.9724	25.4185	26.2112	26.8096	26.2122	27.2662	26.6433	25.5924	26.7638	27.01	27.0163	26.0805	26.1569	25.0852	25.3047	26.2011	25.5022	25.7953	25.0717	25.7537	24.6139	24.9662	24.8432	24.4108	27.0424	25.3939	23.4299	25.8617	25.7163	26.7515	27.1469	26.6952	26.9542	25.7545	25.2875	25.5253	26.2608	23.4017	26.6544	26.6148	26.8383	24.7252	25.8873
	Q14247	Q14247	Src substrate cortactin	1	CTTN	sp|Q14247|SRC8_HUMAN Src substrate cortactin OS=Homo sapiens OX=9606 GN=CTTN PE=1 SV=2	25.9719	26.2529	26.1629	26.4058	26.3418	26.4933	25.4476	25.7708	25.5898	26.42	26.501	26.7265	25.5746	25.1838	24.7313	25.4899	25.8283	25.711	25.4885	25.4285	25.4205	24.8879	24.8457	25.239	26.6886	26.3664	26.748	24.8935	24.8514	24.9469	26.6656	26.5387	26.856	25.6606	25.8612	25.5946	25.999	25.9811	25.7093	26.1608	26.3519	25.9033	24.7442
	P62820	P62820	Ras-related protein Rab-1A	1	RAB1A	sp|P62820|RAB1A_HUMAN Ras-related protein Rab-1A OS=Homo sapiens OX=9606 GN=RAB1A PE=1 SV=3	25.9717	24.7977	25.1035	21.5784	23.6609	23.2884	25.8893	25.3259	25.4043	22.6391	23.1336	21.9719	24.6614	25.1123	26.0014	25.3277	25.8978	25.3987	25.4605	25.6194	24.6368	26.495	26.6079	24.8577	21.6344	27.1615	22.8524	26.0325	25.1971	25.5929	24.2895	21.2611	22.4739	25.6719	25.9467	25.8629	25.0657	24.7835	25.4031	22.5894	23.8275	23.7833	26.0492
	P55265	P55265	Double-stranded RNA-specific adenosine deaminase	1	ADAR	sp|P55265|DSRAD_HUMAN Double-stranded RNA-specific adenosine deaminase OS=Homo sapiens OX=9606 GN=ADAR PE=1 SV=4	25.9644	25.6897	25.6062	25.1069	25.5531	25.1928	24.9833	25.7406	25.3881	25.8421	25.7545	25.6466	26.0902	25.718	26.292	26.3602	25.8097	26.0606	25.4733	25.4205	25.3331	25.7259	25.9339	25.4859	25.6708	25.2918	26.0977	25.4978	25.6455	25.7957	25.6687	25.7923	25.2031	25.6701	25.7736	26.0822	25.3294	26.1275	25.7289	25.2411	25.1963	25.8533	26.1722
	Q01831	Q01831	DNA repair protein complementing XP-C cells	1	XPC	sp|Q01831|XPC_HUMAN DNA repair protein complementing XP-C cells OS=Homo sapiens OX=9606 GN=XPC PE=1 SV=4	25.9615	25.8872	25.7598	25.1188	25.2783	25.539	25.0256	26.255	25.7172	25.6493	25.2715	26.127	26.8748	26.4032	26.2673	26.6589	25.6247	26.0525	25.2531	25.734	25.8361	25.4302	25.6812	25.5965	26.0405	25.4844	27.0119	25.6331	26.1436	25.5544	25.7212	25.6607	25.7554	26.1569	26.8815	26.3284	25.5278	26.6195	25.4974	25.0878	25.0583	26.6165	25.5586
	Q15056	Q15056	Eukaryotic translation initiation factor 4H	1	EIF4H	sp|Q15056|IF4H_HUMAN Eukaryotic translation initiation factor 4H OS=Homo sapiens OX=9606 GN=EIF4H PE=1 SV=5	25.9558	25.9273	25.7287	25.6917	25.9927	25.6379	25.2893	25.7107	25.4241	25.2058	25.465	26.1568	25.8101	26.4764	25.2736	25.4234	26.2577	25.8304	25.4511	25.4448	25.9837	26.1347	25.2849	26.0223	25.7739	27.2393	26.6633	25.5037	25.588	25.0497	26.1136	25.439	25.8962	25.5345	26.6535	26.5109	25.4533	25.7504	25.6308	25.5608	25.6193	26.0204	25.3603
	P30049	P30049	ATP synthase subunit delta, mitochondrial	1	ATP5D	sp|P30049|ATPD_HUMAN ATP synthase subunit delta, mitochondrial OS=Homo sapiens OX=9606 GN=ATP5F1D PE=1 SV=2	25.9528	25.8347	25.8379	25.5486	25.5724	25.9707	26.3258	25.8752	26.3637	25.495	25.5359	25.4969	25.5613	25.6114	25.7283	26.0939	25.7736	25.9674	25.7118	25.7921	25.8444	25.901	25.5986	25.3319	24.9317	25.5555	24.6382	26.2461	25.8364	26.2948	25.0925	24.154	24.9517	25.2903	25.0471	24.2692	26.0234	24.9567	28.6882	26.0179	25.3656	25.0258	25.9193
	Q16576	Q16576	Histone-binding protein RBBP7	1	RBBP7	sp|Q16576|RBBP7_HUMAN Histone-binding protein RBBP7 OS=Homo sapiens OX=9606 GN=RBBP7 PE=1 SV=1	25.952	25.9446	25.9463	25.4413	25.5194	25.3651	25.6252	25.8804	25.4145	25.1141	25.2921	25.4989	25.7691	26.2244	26.0446	25.6929	25.9494	26.0577	25.7896	25.2742	25.8222	25.9143	25.6199	26.1027	25.143	24.6469	25.513	25.98	25.8269	25.8936	25.5256	25.2771	25.4016	25.3194	25.7562	25.739	25.8949	26.155	25.8964	25.5422	25.1368	26.1122	26.0412
	P12268	P12268	Inosine-5-monophosphate dehydrogenase 2	1	IMPDH2	sp|P12268|IMDH2_HUMAN Inosine-5-monophosphate dehydrogenase 2 OS=Homo sapiens OX=9606 GN=IMPDH2 PE=1 SV=2	25.9484	25.9468	25.9123	26.241	26.1109	26.0639	25.9184	26.225	25.9958	25.5457	25.6793	25.6857	25.744	25.7212	25.4481	26.2544	26.5071	26.5128	26.1561	26.1472	26.2199	26.1713	25.9579	26.0102	26.0422	25.3143	26.0383	26.9193	27.2712	26.9967	25.9673	25.4601	25.5276	25.6037	25.7647	25.9042	26.2864	26.0818	26.049	26.1684	25.8883	25.3465	25.9171
	P08708	P08708	40S ribosomal protein S17	1	RPS17	sp|P08708|RS17_HUMAN 40S ribosomal protein S17 OS=Homo sapiens OX=9606 GN=RPS17 PE=1 SV=2	25.943	26.4474	26.1136	26.714	26.3531	26.3716	25.9333	26.741	26.3274	26.5096	26.467	26.6432	26.6179	26.066	26.0978	26.1354	26.5363	26.7451	26.6276	26.8928	26.6014	27.2048	26.3992	26.6321	26.1175	27.1708	26.727	26.4421	27.1496	26.9532	27.0424	26.4063	26.481	26.8993	26.8383	27.1919	26.2917	26.2523	26.7511	26.679	26.5381	26.1354	26.0949
	Q96SB3	Q96SB3	Neurabin-2	1	PPP1R9B	sp|Q96SB3|NEB2_HUMAN Neurabin-2 OS=Homo sapiens OX=9606 GN=PPP1R9B PE=1 SV=2	25.9416	26.2289	26.3094	26.7366	26.3827	26.6399	26.4152	25.4126	26.3977	26.4126	26.9261	26.4248	25.3283	24.737	25.6806	25.7032	25.267	25.1705	25.5766	25.5943	25.0597	25.354	25.322	25.4136	26.8498	25.0083	24.9009	25.4538	24.7412	25.3957	26.7807	26.6839	26.9614	25.5817	25.5291	24.1467	26.3571	24.2797	26.3184	26.7653	27.0431	26.7803	25.5322
	Q8NE71	Q8NE71	ATP-binding cassette sub-family F member 1	1	ABCF1	sp|Q8NE71|ABCF1_HUMAN ATP-binding cassette sub-family F member 1 OS=Homo sapiens OX=9606 GN=ABCF1 PE=1 SV=2	25.9382	25.9011	25.7775	25.6451	25.2658	25.6597	25.8962	26.0258	26.2096	25.5746	26.4169	25.5966	25.8057	25.7776	26.0317	25.7474	25.95	25.9935	26.3822	26.4111	26.3028	26.6153	26.7991	26.4827	25.7523	25.9251	25.8917	25.9317	25.8483	25.5876	25.8374	25.7362	25.822	25.7618	25.6849	25.7009	25.8375	25.6749	26.08	25.1181	26.0138	25.6438	26.1374
	O60832	O60832	H/ACA ribonucleoprotein complex subunit 4	1	DKC1	sp|O60832|DKC1_HUMAN H/ACA ribonucleoprotein complex subunit DKC1 OS=Homo sapiens OX=9606 GN=DKC1 PE=1 SV=3	25.9264	25.182	25.2437	24.7817	25.5939	25.1321	25.1759	25.2529	25.2232	25.0272	25.1778	25.3047	24.9283	25.3326	26.6153	26.1511	25.3905	25.5422	25.919	25.8938	25.9709	26.0413	26.3392	25.8541	25.0406	25.7854	25.3039	25.7813	25.3229	25.3813	25.0056	25.6425	24.9585	25.3365	24.8409	24.6039	24.9623	25.4902	25.3172	24.8988	24.7402	25.8118	25.8627
	Q16531	Q16531	DNA damage-binding protein 1	1	DDB1	sp|Q16531|DDB1_HUMAN DNA damage-binding protein 1 OS=Homo sapiens OX=9606 GN=DDB1 PE=1 SV=1	25.9142	25.5524	25.8044	25.5113	25.8335	25.6378	25.7789	26.2585	25.9011	26.3615	25.921	25.6101	26.1013	26.0715	25.9165	25.9666	26.1815	26.2326	25.4533	25.638	25.9327	25.8184	25.8703	25.5636	25.972	25.6821	25.7847	25.6688	25.9022	25.9045	26.0591	25.9559	25.7965	25.7328	25.809	25.9848	25.5343	26.3707	26.0509	25.8496	25.788	25.6244	25.7243
	Q92597	Q92597	Protein NDRG1	1	NDRG1	sp|Q92597|NDRG1_HUMAN Protein NDRG1 OS=Homo sapiens OX=9606 GN=NDRG1 PE=1 SV=1	25.9129	24.7161	25.3676	26.2629	26.858	24.6444	23.2205	23.7142	25.1165	25.325	25.9213	26.3504	24.5287	24.2826	23.8118	25.062	25.0383	25.0416	26.6144	24.8498	24.6618	24.445	25.1826	24.8341	24.4605	29.4468	25.2596	24.7127	24.266	25.4472	25.7269	29.9414	25.1447	25.5921	25.3809	25.1704	25.3553	24.5089	26.9609	24.5845	24.6906	25.6431	25.0686
	Q08170	Q08170	Serine/arginine-rich splicing factor 4	1	SRSF4	sp|Q08170|SRSF4_HUMAN Serine/arginine-rich splicing factor 4 OS=Homo sapiens OX=9606 GN=SRSF4 PE=1 SV=2	25.9082	24.5408	25.3853	26.4578	26.3724	26.2464	25.9281	26.5092	26.1978	26.1463	26.8887	26.7171	26.532	26.2685	25.6042	27.079	26.2408	26.5816	26.2786	26.6768	25.8795	26.2952	26.3159	25.4191	27.3922	26.1013	25.7803	25.3253	25.6533	26.5289	28.3562	27.5812	26.9709	28.3289	28.7377	29.1002	25.0513	24.9357	26.0613	26.4013	26.9508	26.9241	26.4417
	P06312	P06312	Ig kappa chain V-IV region	1	IGKV4-1	sp|P06312|KV401_HUMAN Immunoglobulin kappa variable 4-1 OS=Homo sapiens OX=9606 GN=IGKV4-1 PE=1 SV=1	25.907	25.4644	25.2616	23.9946	24.6683	23.8611	25.9875	26.8905	25.9382	26.5447	26.2071	24.154	26.6012	26.1077	25.5737	26.105	26.1955	26.2339	25.6612	26.1684	26.6216	26.2072	25.8583	24.9079	25.4178	23.7128	24.8398	25.7652	26.9785	26.7249	25.587	25.0423	25.0646	25.718	25.0016	25.4283	25.5452	25.8231	25.9659	25.1868	24.808	24.2108	25.6432
	Q8N4C6	Q8N4C6	Ninein	1	NIN	sp|Q8N4C6|NIN_HUMAN Ninein OS=Homo sapiens OX=9606 GN=NIN PE=1 SV=4	25.9004	24.6428	25.342	25.5575	24.64	26.5125	26.2677	24.2719	24.2501	24.6922	25.5531	23.673	23.4044	22.8003	24.3586	24.6543	24.5006	24.4473	24.5267	24.8882	25.4778	24.5483	25.0802	23.6541	26.3426	25.8517	24.4344	24.4244	23.63	24.3222	25.3621	25.1272	24.8184	23.3861	24.5441	24.3827	25.5068	23.6201	25.0919	25.4238	26.0544	25.1486	24.4259
	P49207	P49207	60S ribosomal protein L34	1	RPL34	sp|P49207|RL34_HUMAN 60S ribosomal protein L34 OS=Homo sapiens OX=9606 GN=RPL34 PE=1 SV=3	25.895	25.5386	25.182	25.981	26.3244	25.4047	25.5851	25.7678	24.4541	25.2752	25.7058	26.1918	24.3918	25.4845	23.7946	25.3973	24.2426	24.4587	26.5654	25.8983	23.8585	26.7847	26.4311	25.4957	28.0357	27.8076	27.1839	24.5544	23.7442	25.1964	27.1525	27.4709	27.2786	25.9604	26.0288	25.7531	23.7036	21.4711	24.9779	25.7828	25.5312	26.7093	22.6438
	Q6P2Q9	Q6P2Q9	Pre-mRNA-processing-splicing factor 8	1	PRPF8	sp|Q6P2Q9|PRP8_HUMAN Pre-mRNA-processing-splicing factor 8 OS=Homo sapiens OX=9606 GN=PRPF8 PE=1 SV=2	25.8904	25.1097	25.2881	25.1886	25.318	25.335	25.4986	25.8295	25.7114	25.2827	25.4583	25.0762	26.0623	25.852	26.3692	26.135	25.7845	26.0873	29.1537	29.6102	29.4177	25.5248	25.9364	24.8281	25.0926	24.6303	24.8793	25.9457	25.9761	25.9636	25.5466	25.6317	25.3695	29.1948	29.0849	29.4572	25.3667	26.1277	25.9766	26.1335	26.0719	26.2757	26.361
	Q08945	Q08945	FACT complex subunit SSRP1	1	SSRP1	sp|Q08945|SSRP1_HUMAN FACT complex subunit SSRP1 OS=Homo sapiens OX=9606 GN=SSRP1 PE=1 SV=1	25.8882	24.5612	24.9465	25.1177	25.4755	24.7901	22.4909	23.8956	23.9492	24.5358	23.8521	23.9235	24.5334	24.8195	26.3036	25.7857	24.927	25.4599	25.4993	24.5312	24.838	24.9004	25.7665	24.322	24.5538	23.7731	24.9792	24.9886	24.7674	24.2474	24.5871	25.7482	24.0475	25.0575	24.864	25.0358	24.4554	26.1039	24.7297	24.1956	24.1135	22.2738	25.5324
	Q9Y3U8	Q9Y3U8	60S ribosomal protein L36	1	RPL36	sp|Q9Y3U8|RL36_HUMAN 60S ribosomal protein L36 OS=Homo sapiens OX=9606 GN=RPL36 PE=1 SV=3	25.8865	25.5655	25.4917	26.1557	26.1788	26.1438	25.4502	26.2877	26.4782	26.3965	26.758	26.4205	25.9753	25.5833	25.2771	25.281	24.9432	25.2409	26.6098	27.1112	26.1883	27.3548	27.3342	27.2308	26.9388	27.0263	26.4177	25.3765	25.6142	26.1026	26.9909	26.6819	26.0347	26.1103	26.5549	25.5318	24.9812	25.227	26.3449	25.8841	25.5182	26.7579	24.2152
	O60716	O60716	Catenin delta-1	1	CTNND1	sp|O60716|CTND1_HUMAN Catenin delta-1 OS=Homo sapiens OX=9606 GN=CTNND1 PE=1 SV=1	25.8849	25.999	26.0142	25.4631	25.4922	25.5768	26.1444	26.2179	25.9354	25.4759	25.5215	25.3879	26.0277	25.6436	25.6845	26.1047	26.1954	26.2291	25.6178	25.9322	25.7676	25.8137	26.0135	25.9451	25.2476	25.2843	25.4422	25.8498	25.9359	25.8381	25.3826	25.5629	25.8483	25.6296	25.6764	25.9648	26.0276	26.1709	26.1817	25.6583	25.4062	26.1075	25.9052
	P33992	P33992	DNA replication licensing factor MCM5	1	MCM5	sp|P33992|MCM5_HUMAN DNA replication licensing factor MCM5 OS=Homo sapiens OX=9606 GN=MCM5 PE=1 SV=5	25.8842	26.0419	25.7158	25.9193	26.1227	25.688	25.889	26.046	25.6269	25.4488	25.8704	25.962	24.5927	25.1275	23.8582	26.1593	26.1148	25.9841	25.4566	25.4271	25.8387	25.452	25.3186	25.618	25.5063	25.8085	24.9251	25.9059	25.7884	26.1591	25.3135	25.4923	25.9832	25.5995	26.0283	25.9351	25.7938	26.3752	26.0209	25.675	25.5126	25.6493	25.7457
	Q15334	Q15334	Lethal(2) giant larvae protein homolog 1	1	LLGL1	sp|Q15334|L2GL1_HUMAN Lethal(2) giant larvae protein homolog 1 OS=Homo sapiens OX=9606 GN=LLGL1 PE=1 SV=3	25.8793	25.5011	24.3401	23.9304	20.9649	22.5239	22.4363	23.6585	23.1939	20.4799	23.6032	23.1441	27.418	26.4469	26.2272	28.0913	26.938	27.3378	24.4957	24.409	24.5033	26.4647	25.0842	24.804	20.3606	23.7327	24.13	25.0208	27.1562	26.9271	23.1109	23.5795	23.6134	25.92	21.5905	21.8808	22.9734	25.9004	23.3996	22.1463	22.4329	23.5963	25.0731
	Q53TQ3	Q53TQ3	INO80 complex subunit D	1	INO80D	sp|Q53TQ3|IN80D_HUMAN INO80 complex subunit D OS=Homo sapiens OX=9606 GN=INO80D PE=1 SV=2	25.8782	25.6395	25.6009	25.2815	25.8421	23.0397	24.3084	25.8412	25.7009	23.7896	26.4151	25.7466	25.8886	26.5733	26.2896	26.6468	27.0375	26.3462	25.5379	25.7181	23.8948	25.7731	25.9845	25.5541	26.1815	25.6204	26.9685	25.6534	25.9053	25.9378	26.3942	25.6943	25.1167	25.4438	23.2352	25.8671	25.4884	26.116	26.3474	25.8421	25.3261	26.6092	25.9252
	Q9NQX4	Q9NQX4	Unconventional myosin-Vc	1	MYO5C	sp|Q9NQX4|MYO5C_HUMAN Unconventional myosin-Vc OS=Homo sapiens OX=9606 GN=MYO5C PE=1 SV=2	25.8777	25.99	25.995	26.1519	25.9463	26.1926	26.4136	25.4432	26.557	25.8971	26.6902	25.0061	22.9917	21.6609	23.6032	26.2105	24.8595	24.7854	25.2838	25.3847	24.9331	24.0239	24.2299	24.2963	25.539	24.1458	18.3258	24.6272	23.6993	25.3105	25.7477	25.8301	25.8977	23.1926	22.7225	20.1407	26.1671	22.3163	26.6573	26.3289	26.4249	25.8167	24.6201
	Q7Z7K6	Q7Z7K6	Centromere protein V	1	CENPV	sp|Q7Z7K6|CENPV_HUMAN Centromere protein V OS=Homo sapiens OX=9606 GN=CENPV PE=1 SV=1	25.869	23.9967	24.1116	24.431	25.2109	24.5724	23.1837	23.2506	22.866	23.8301	23.2251	23.1128	24.147	24.0818	26.5831	25.6804	24.9376	25.3647	25.5875	24.2909	24.3808	25.0009	26.3037	24.8795	23.6435	22.735	24.9604	25.8826	24.9518	24.5744	24.9646	25.8855	24.7812	25.137	23.9933	23.5752	24.3042	25.834	24.6343	23.7566	24.1479	25.873	26.4567
	P62140	P62140	Serine/threonine-protein phosphatase PP1-beta catalytic subunit	1	PPP1CB	sp|P62140|PP1B_HUMAN Serine/threonine-protein phosphatase PP1-beta catalytic subunit OS=Homo sapiens OX=9606 GN=PPP1CB PE=1 SV=3	25.8646	26.0238	26.2795	26.9226	26.5018	26.5978	26.9369	26.3222	27.1117	26.0757	26.8059	26.3894	25.4128	25.1055	25.4098	26.1214	25.0604	25.8272	25.7737	26.1533	25.9686	25.9326	26.0371	25.2908	26.4538	25.3395	24.9561	26.1515	26	26.6162	26.9061	26.4253	26.3103	24.7508	23.4953	24.6239	26.0474	25.0047	26.7992	26.1847	26.0746	25.5616	25.8922
	Q96IZ0	Q96IZ0	PRKC apoptosis WT1 regulator protein	1	PAWR	sp|Q96IZ0|PAWR_HUMAN PRKC apoptosis WT1 regulator protein OS=Homo sapiens OX=9606 GN=PAWR PE=1 SV=1	25.8643	25.9494	26.2109	26.6359	26.2505	26.1125	26.1575	25.105	25.6556	26.2507	26.2825	25.94	24.5094	24.6733	24.8789	24.9994	24.8271	24.7471	25.3177	24.9341	25.1568	24.2472	24.4132	24.5115	26.2911	25.0256	23.8306	24.8989	24.4439	24.8826	26.1803	26.0735	26.5234	25.431	25.2491	25.3546	26.1799	23.6375	25.8971	25.6875	26.0285	26.7421	24.6007
	Q92621	Q92621	Nuclear pore complex protein Nup205	1	NUP205	sp|Q92621|NU205_HUMAN Nuclear pore complex protein Nup205 OS=Homo sapiens OX=9606 GN=NUP205 PE=1 SV=3	25.8623	25.5568	25.4602	25.5425	26.147	25.7198	25.074	22.2863	25.5696	25.533	25.699	25.2438	30.9842	30.1967	30.1456	25.5763	25.0268	25.7558	25.3244	23.3758	23.3562	25.1904	25.6092	24.2399	25.2485	24.808	24.6803	26.9726	28.8281	26.3001	24.4338	26.1794	25.3639	24.5375	24.4401	24.3335	25.5474	25.6699	25.9728	25.253	25.5876	24.8388	26.5195
	P04075	P04075	Fructose-bisphosphate aldolase A	1	ALDOA	sp|P04075|ALDOA_HUMAN Fructose-bisphosphate aldolase A OS=Homo sapiens OX=9606 GN=ALDOA PE=1 SV=2	25.859	25.5693	25.1888	26.329	26.771	26.0439	25.5273	25.2711	25.7044	26.2657	26.1131	25.6897	25.6713	26.3325	24.6272	25.6113	25.8573	25.6029	24.9625	25.2673	25.8806	26.3632	25.2327	25.1063	26.2334	29.1537	25.7647	25.4483	25.5059	25.4804	26.909	26.0531	26.3266	27.0145	26.527	26.4808	25.1288	24.2859	25.9981	26.3855	26.4471	24.9304	24.9338
	Q9Y230	Q9Y230	RuvB-like 2	1	RUVBL2	sp|Q9Y230|RUVB2_HUMAN RuvB-like 2 OS=Homo sapiens OX=9606 GN=RUVBL2 PE=1 SV=3	25.8527	25.8256	25.9155	25.7531	25.7037	25.5955	25.647	25.6603	25.5528	25.3378	25.3934	24.8839	26.6335	26.3157	26.0507	26.5823	26.4501	26.2493	25.7622	25.572	25.5973	25.4239	25.2832	25.2845	25.4296	25.3268	25.8283	25.4812	25.5441	25.5893	25.9648	25.6147	25.564	25.9973	26.041	26.0441	26.0102	26.0995	26.1707	25.8254	25.4267	25.8704	25.9973
	Q86VP6	Q86VP6	Cullin-associated NEDD8-dissociated protein 1	1	CAND1	sp|Q86VP6|CAND1_HUMAN Cullin-associated NEDD8-dissociated protein 1 OS=Homo sapiens OX=9606 GN=CAND1 PE=1 SV=2	25.8488	25.057	25.3711	24.6185	26.0194	24.8401	26.2434	25.1632	26.1038	25.0336	25.6416	25.2381	24.9047	25.1597	25.0294	26.2455	24.8949	25.19	25.746	25.0574	26.0178	24.794	24.6768	25.3749	25.0164	24.9224	23.3265	25.8405	25.683	26.8207	25.1939	25.1843	24.9771	25.023	23.6642	24.9125	25.9744	24.5124	26.1543	24.8364	23.646	22.2311	26.2127
	Q96PV7	Q96PV7	Protein FAM193B	1	FAM193B	sp|Q96PV7|F193B_HUMAN Protein FAM193B OS=Homo sapiens OX=9606 GN=FAM193B PE=1 SV=3	25.8479	24.0673	25.464	26.2625	26.0317	26.8677	25.4682	26.1421	25.6459	22.9025	25.9128	25.819	27.0056	26.2293	26.1354	26.3708	26.1226	26.3041	24.1491	25.5401	25.2542	25.6557	25.8664	25.3344	26.3965	25.6638	26.3782	25.8905	26.0433	25.8458	26.0497	26.0633	25.957	26.2456	26.2178	26.3193	25.5204	26.2105	25.7604	25.7036	25.7176	25.6184	26.0724
	Q14839	Q14839	Chromodomain-helicase-DNA-binding protein 4	1	CHD4	sp|Q14839|CHD4_HUMAN Chromodomain-helicase-DNA-binding protein 4 OS=Homo sapiens OX=9606 GN=CHD4 PE=1 SV=2	25.8435	25.5569	25.6255	24.9294	25.4015	24.904	24.8715	24.823	25.1562	25.4246	25.3403	25.2998	25.3702	25.5761	25.9559	25.4161	25.2537	25.4439	25.446	25.1227	25.1339	25.0783	25.4257	25.0441	25.5145	24.8438	25.8335	25.2353	25.111	24.9761	25.3115	25.6188	25.1111	25.2215	25.2177	25.2718	25.2724	25.7588	25.5546	24.6281	25.0559	25.9645	25.5464
	Q9NY12	Q9NY12	H/ACA ribonucleoprotein complex subunit 1	1	GAR1	sp|Q9NY12|GAR1_HUMAN H/ACA ribonucleoprotein complex subunit 1 OS=Homo sapiens OX=9606 GN=GAR1 PE=1 SV=1	25.8363	25.2357	24.9486	24.229	24.8751	24.5745	24.274	24.5725	24.3331	22.4965	24.1644	23.8974	23.9549	25.076	26.2247	24.3439	24.3091	24.8382	25.5007	24.803	25.2568	25.784	26.2671	25.6222	24.3016	24.9439	24.8345	25.6256	24.1649	24.689	23.7362	25.0543	24.1752	24.1963	24.2218	23.3328	24.8646	25.7099	23.8793	22.4706	24.282	23.4056	24.8878
	P55769	P55769	NHP2-like protein 1;NHP2-like protein 1, N-terminally processed	1	NHP2L1	sp|P55769|NH2L1_HUMAN NHP2-like protein 1 OS=Homo sapiens OX=9606 GN=SNU13 PE=1 SV=3	25.835	23.3516	24.7537	23.875	24.2804	24.1178	24.1374	25.3635	25.1242	25.8143	24.7345	22.7382	25.6112	24.6655	26.1763	27.1481	24.9161	25.6353	24.9938	25.5934	24.3873	25.4483	25.4099	24.5362	23.635	23.4296	23.3147	25.8503	25.523	25.7784	25.6394	25.3193	24.0428	25.384	24.0657	22.2879	23.7212	24.4654	25.4038	24.4672	24.3313	23.6774	26.0638
	Q96N67	Q96N67	Dedicator of cytokinesis protein 7	1	DOCK7	sp|Q96N67|DOCK7_HUMAN Dedicator of cytokinesis protein 7 OS=Homo sapiens OX=9606 GN=DOCK7 PE=1 SV=4	25.8276	25.8226	26.1481	26.237	25.9816	26.2528	26.4735	25.3642	26.4788	25.6488	25.9687	25.6653	24.8124	24.0561	25.3088	25.3836	25.1324	25.2242	25.4185	25.5931	25.6294	24.7726	24.8846	24.4973	25.6517	25.1714	23.9184	25.9559	25.8964	26.1854	25.7882	25.7489	25.8954	24.843	24.911	24.6132	26.3807	24.5736	26.5729	25.9958	26.057	26.4086	25.4446
	Q6P2E9	Q6P2E9	Enhancer of mRNA-decapping protein 4	1	EDC4	sp|Q6P2E9|EDC4_HUMAN Enhancer of mRNA-decapping protein 4 OS=Homo sapiens OX=9606 GN=EDC4 PE=1 SV=1	25.8258	25.571	25.9209	25.5094	25.5635	25.613	25.7395	25.4009	25.7282	25.3929	25.4605	25.405	25.8378	25.9303	25.836	26.4119	26.0993	26.2976	25.863	25.6648	25.8727	25.3474	25.4441	25.267	25.4264	25.0841	25.2257	25.6008	25.4681	25.6704	25.2476	25.6038	25.597	25.8273	25.9934	25.7647	26.02	25.2172	25.7989	25.5729	25.6584	26.2459	25.9384
	O75533	O75533	Splicing factor 3B subunit 1	1	SF3B1	sp|O75533|SF3B1_HUMAN Splicing factor 3B subunit 1 OS=Homo sapiens OX=9606 GN=SF3B1 PE=1 SV=3	25.8187	25.2798	25.5378	25.2474	25.4735	25.6006	25.5176	26.0193	25.7923	25.6725	25.2413	25.3992	26.2061	25.9549	26.3417	26.0285	25.95	25.9546	25.4971	25.5417	25.3518	25.8431	26.1147	25.4127	25.3659	25.4271	26.0355	25.8995	25.9356	25.8944	25.6953	25.801	25.6467	26.0965	26.2154	26.1851	25.3756	26.0568	25.7834	25.3012	25.6898	25.7571	26.2441
	P56270	P56270	Myc-associated zinc finger protein	1	MAZ	sp|P56270|MAZ_HUMAN Myc-associated zinc finger protein OS=Homo sapiens OX=9606 GN=MAZ PE=1 SV=1	25.8135	26.0417	25.8309	27.1018	26.9415	27.1038	25.329	26.1607	25.4196	27.1451	27.0393	27.2797	26.991	26.4177	25.9042	25.5542	26.4415	26.227	25.6631	25.9548	25.7169	26.056	26.2346	26.4389	27.9545	26.8223	27.7688	25.9855	26.4755	26.0536	27.2662	27.1442	27.4276	27.5978	27.8031	28.1218	25.6206	26.312	25.1757	27.0328	27.1343	27.92	26.3491
	O96019	O96019	Actin-like protein 6A	2	ACTL6A	sp|O96019|ACL6A_HUMAN Actin-like protein 6A OS=Homo sapiens OX=9606 GN=ACTL6A PE=1 SV=1	25.8116	25.6301	25.4611	24.5857	25.0687	24.771	24.8478	25.3146	25.0253	24.6642	24.2201	24.7023	25.6022	26.0383	26.2336	26.1049	25.9264	25.9855	25.2259	25.2006	25.5431	25.1115	25.3946	24.6961	25.1532	25.4731	25.6386	25.4403	25.0446	25.4514	24.7726	25.3085	25.3283	25.0341	24.793	25.1727	25.4422	25.6526	25.4457	24.9134	24.7648	22.906	25.6005
	Q14527	Q14527	Helicase-like transcription factor	1	HLTF	sp|Q14527|HLTF_HUMAN Helicase-like transcription factor OS=Homo sapiens OX=9606 GN=HLTF PE=1 SV=2	25.8078	26.0881	25.9302	25.4247	25.5918	25.5325	25.6812	26.3938	25.6628	26.1017	26.054	25.7073	26.6175	26.3158	25.8448	26.0776	26.4559	26.3508	25.7901	26.0791	26.2453	26.045	26.0212	26.1415	25.6727	25.3748	26.1876	25.886	26.1987	25.9704	25.9424	25.7191	25.4659	25.8931	26.1352	26.4435	25.8104	26.7748	25.8513	25.7573	25.4147	25.8438	26.4876
	Q15393	Q15393	Splicing factor 3B subunit 3	1	SF3B3	sp|Q15393|SF3B3_HUMAN Splicing factor 3B subunit 3 OS=Homo sapiens OX=9606 GN=SF3B3 PE=1 SV=4	25.806	25.43	25.387	24.7658	25.2785	25.0766	25.1212	25.7091	25.412	25.1832	24.9312	24.822	25.608	25.489	26.1232	25.9165	25.4723	25.8047	25.3895	25.1529	25.6814	25.3748	25.7846	25.0809	25.1164	25.1219	25.5247	25.7475	25.8209	26.0999	25.7302	25.6202	25.4338	25.7623	25.7183	25.7752	25.3714	26.0509	25.6038	25.0164	25.0933	24.9706	26.1221
	P98160	P98160	Basement membrane-specific heparan sulfate proteoglycan core protein;Endorepellin;LG3 peptide	1	HSPG2	sp|P98160|PGBM_HUMAN Basement membrane-specific heparan sulfate proteoglycan core protein OS=Homo sapiens OX=9606 GN=HSPG2 PE=1 SV=4	25.7949	23.3574	23.414	23.9926	22.8612	22.7303	22.3163	23.2774	22.6583	23.2928	23.3545	23.4319	23.2073	23.4275	23.6316	23.0042	23.4329	23.3984	23.3935	23.4516	23.2369	23.4536	22.9594	23.747	21.9948	23.2056	23.9528	23.0888	23.3673	23.1399	23.4969	23.9101	23.4942	23.5262	24.3841	24.4685	23.8693	23.3615	23.3923	23.1894	22.0083	26.2123	22.9028
	Q92485	Q92485	Acid sphingomyelinase-like phosphodiesterase 3b	1	SMPDL3B	sp|Q92485|ASM3B_HUMAN Acid sphingomyelinase-like phosphodiesterase 3b OS=Homo sapiens OX=9606 GN=SMPDL3B PE=1 SV=2	25.7946	25.5346	25.9029	26.3912	26.0068	26.574	26.3861	25.3472	26.3371	25.7427	26.2889	25.7348	25.6811	24.9391	26.1543	24.7822	24.9421	25.4179	25.6751	25.8386	25.6224	25.3267	25.1407	24.6407	26.1923	24.8317	23.5603	25.6293	24.5196	25.8628	25.0238	25.8785	26.1932	25.2234	25.8746	25.3583	26.4465	22.9751	26.473	25.4791	25.9505	26.2852	25.7542
	P62861	P62861	40S ribosomal protein S30	1	FAU	sp|P62861|RS30_HUMAN 40S ribosomal protein S30 OS=Homo sapiens OX=9606 GN=FAU PE=1 SV=1	25.7937	25.6108	25	24.0639	24.7791	24.3279	25.4097	25.2807	24.7581	23.7255	23.7836	25.203	25.5082	26.0078	24.7702	26.0717	24.8356	24.5296	25.9406	25.6251	25.6901	26.1407	26.3551	25.4962	25.2486	25.1858	24.5112	25.263	24.9276	25.2661	24.8369	25.0877	24.5598	23.5039	24.3754	24.3869	24.7477	25.5587	25.0223	22.4706	23.8633	22.5435	24.5359
	P61513	P61513	60S ribosomal protein L37a	2	RPL37A	sp|P61513|RL37A_HUMAN 60S ribosomal protein L37a OS=Homo sapiens OX=9606 GN=RPL37A PE=1 SV=2	25.7841	25.623	25.4592	23.9172	26.5702	25.23	25.5902	26.2891	25.5063	24.0884	24.9312	25.6732	24.1893	25.8201	23.6695	24.3277	24.2544	24.9434	26.1923	26.0599	25.5107	26.0569	25.6673	25.6024	26.1317	25.8054	25.531	24.6288	24.4425	23.4082	25.4106	26.0629	26.5289	25.175	25.8719	25.4149	23.8683	23.2869	24.4641	23.5406	24.3785	25.2242	23.6991
	Q9NZI7	Q9NZI7	Upstream-binding protein 1	1	UBP1	sp|Q9NZI7|UBIP1_HUMAN Upstream-binding protein 1 OS=Homo sapiens OX=9606 GN=UBP1 PE=1 SV=1	25.7755	24.7601	25.5504	25.2795	26.0656	25.6128	25.2384	26.1796	25.4054	23.778	23.2374	24.4516	25.3152	25.5007	25.35	26.1165	25.8674	26.151	24.7206	22.6402	25.0373	24.9283	23.0153	24.3793	24.9408	24.2661	25.2239	24.8916	24.1571	23.8394	24.0432	24.9528	24.2056	25.0067	24.0498	24.4244	24.8058	25.3901	25.6855	23.4747	23.8593	22.2468	24.4035
	Q9Y3Y2	Q9Y3Y2	Chromatin target of PRMT1 protein	1	CHTOP	sp|Q9Y3Y2|CHTOP_HUMAN Chromatin target of PRMT1 protein OS=Homo sapiens OX=9606 GN=CHTOP PE=1 SV=2	25.7726	25.5108	25.3278	25.2807	26.7754	25.6793	25.3338	26.0605	25.298	26.7638	26.0414	25.9136	26.9545	26.8902	26.9803	26.6389	26.1604	26.0914	25.0984	25.0807	25.6513	25.4728	26.0356	25.837	26.3747	25.7218	26.2552	26.5397	26.7796	26.003	26.4559	26.6087	25.8918	27.0881	27.2455	27.3935	24.7417	25.7466	25.6054	25.5763	25.3517	26.879	27.8785
	P30153	P30153	Serine/threonine-protein phosphatase 2A 65 kDa regulatory subunit A alpha isoform	1	PPP2R1A	sp|P30153|2AAA_HUMAN Serine/threonine-protein phosphatase 2A 65 kDa regulatory subunit A alpha isoform OS=Homo sapiens OX=9606 GN=PPP2R1A PE=1 SV=4	25.7703	25.3999	25.7933	25.6186	25.9157	25.782	26.2197	26.1076	26.2725	25.7208	25.8052	25.0246	25.6812	25.5925	25.3982	25.8073	25.9376	26.1426	25.1842	25.8484	25.6225	26.7516	26.3888	25.5916	25.3908	26.1688	23.1084	27.1548	27.7806	27.7428	25.8034	25.6773	25.2021	25.9471	25.4695	25.584	25.9137	24.851	26.3748	25.5757	25.6361	19.7095	26.0164
	Q9BVP2	Q9BVP2	Guanine nucleotide-binding protein-like 3	1	GNL3	sp|Q9BVP2|GNL3_HUMAN Guanine nucleotide-binding protein-like 3 OS=Homo sapiens OX=9606 GN=GNL3 PE=1 SV=2	25.768	25.3651	25.5983	24.9506	25.8509	25.4335	25.8909	26.0632	26.3404	25.8162	25.9187	25.9955	25.2779	25.5947	26.0804	26.316	25.3932	25.5891	26.4748	26.7962	26.7111	27.0769	27.1178	26.6713	25.9455	25.5361	26.197	26.0926	25.6125	26.1458	25.8197	25.8549	25.7283	25.617	25.418	24.7889	25.1308	25.5849	26.0886	24.9526	25.481	22.7278	24.9921
	P60891	P60891	Ribose-phosphate pyrophosphokinase 1	2	PRPS1	sp|P60891|PRPS1_HUMAN Ribose-phosphate pyrophosphokinase 1 OS=Homo sapiens OX=9606 GN=PRPS1 PE=1 SV=2	25.7674	25.5036	25.4042	25.5162	25.3883	25.4854	25.7594	25.4806	26.1393	25.2913	25.2336	25.3236	25.067	24.4983	25.4092	25.563	25.3792	25.7353	25.4438	25.8691	26.4917	26.3091	26.0745	26.2422	24.4809	24.2065	24.5158	26.0067	25.8777	26.2308	24.0048	24.5028	24.6957	25.0478	25.4659	25.359	26.3792	25.4648	25.2005	25.076	25.0613	24.7883	26.555
	P53396	P53396	ATP-citrate synthase	1	ACLY	sp|P53396|ACLY_HUMAN ATP-citrate synthase OS=Homo sapiens OX=9606 GN=ACLY PE=1 SV=3	25.7662	25.3862	25.5681	25.816	26.2496	25.6704	26.0035	25.1064	26.1874	25.451	25.6802	25.3056	24.6682	25.3789	24.6357	26.3401	26.2912	26.5542	25.3123	25.0443	25.6702	25.6532	24.6461	25.2572	25.1536	25.4648	24.3632	25.7682	25.5079	25.9001	24.9031	25.1978	24.9153	25.1349	25.4776	24.9352	26.1285	23.7314	26.0087	25.5444	25.6348	25.7605	25.5533
	Q9UBI6	Q9UBI6	Guanine nucleotide-binding protein G(I)/G(S)/G(O) subunit gamma-12	1	GNG12	sp|Q9UBI6|GBG12_HUMAN Guanine nucleotide-binding protein G(I)/G(S)/G(O) subunit gamma-12 OS=Homo sapiens OX=9606 GN=GNG12 PE=1 SV=3	25.7645	25.5783	25.9005	26.4087	26.1752	26.5455	25.9448	24.5803	26.4556	26.3944	26.4639	25.6129	24.9023	24.1932	25.167	26.1389	25.2996	24.9737	25.1897	25.4676	24.7183	24.1043	24.8474	24.0604	26.0028	25.3802	23.7484	25.6304	24.8083	25.8112	26.5196	26.1997	26.3196	25.5327	25.6428	24.9679	26.3351	22.5435	26.3423	25.9058	26.0527	25.3002	25.7353
	P05455	P05455	Lupus La protein	1	SSB	sp|P05455|LA_HUMAN Lupus La protein OS=Homo sapiens OX=9606 GN=SSB PE=1 SV=2	25.7638	25.8953	25.85	25.7277	26.2272	25.5229	25.4234	25.7798	25.6671	26.2888	25.7162	25.8481	25.4201	25.7118	25.0587	24.6321	25.4699	25.5478	25.5894	25.6626	25.9201	25.8764	25.6603	25.8436	26.2319	25.5709	25.904	24.9683	24.8579	25.1726	25.9922	25.8667	26.0133	25.6817	25.8742	25.784	25.2947	25.4969	25.2128	25.7041	25.6428	26.4332	24.949
	O00541	O00541	Pescadillo homolog	1	PES1	sp|O00541|PESC_HUMAN Pescadillo homolog OS=Homo sapiens OX=9606 GN=PES1 PE=1 SV=1	25.7626	24.8453	25.0386	24.761	25.1943	25.1159	24.6024	25.2436	24.387	25.5222	25.0866	25.2505	25.7732	25.1073	26.2841	26.1052	25.3778	25.5865	25.6107	25.5611	25.4009	26.0663	26.5218	26.1866	29.1461	28.6196	29.8412	25.8715	26.1603	25.5618	25.5281	25.7916	25.0082	25.5812	25.3515	25.4497	24.8305	26.2434	25.2244	24.5173	24.4576	24.9371	26.0488
	Q96FZ2	Q96FZ2	Embryonic stem cell-specific 5-hydroxymethylcytosine-binding protein	1	HMCES	sp|Q96FZ2|HMCES_HUMAN Embryonic stem cell-specific 5-hydroxymethylcytosine-binding protein OS=Homo sapiens OX=9606 GN=HMCES PE=1 SV=1	25.7544	25.4549	25.9032	25.0585	25.3653	25.207	25.6799	26.7442	25.6567	25.5577	25.1543	25.243	26.2693	26.0282	25.3868	26.5241	26.4207	26.5982	25.3996	26.1016	25.8479	25.9139	25.9854	25.4216	25.5483	24.9922	25.4893	25.1302	25.8466	25.5222	25.5616	25.322	25.163	25.2451	25.4786	25.8131	25.3405	26.3302	25.7245	25.5509	25.1829	24.2978	25.6888
	Q92945	Q92945	Far upstream element-binding protein 2	1	KHSRP	sp|Q92945|FUBP2_HUMAN Far upstream element-binding protein 2 OS=Homo sapiens OX=9606 GN=KHSRP PE=1 SV=4	25.7532	25.4847	25.3925	25.2263	25.6814	24.9793	25.1155	25.6022	25.122	24.9954	25.0431	25.259	25.7732	26.1206	25.4091	25.5332	25.9316	25.9142	25.4387	25.088	25.6437	25.705	25.2838	25.5028	25.3892	25.1643	25.8959	25.6391	25.5695	25.204	25.6438	25.3689	25.2862	25.3816	25.651	25.706	25.4481	25.3416	25.3272	25.2867	25.2918	25.2106	25.4658
	Q6PKG0	Q6PKG0	La-related protein 1	1	LARP1	sp|Q6PKG0|LARP1_HUMAN La-related protein 1 OS=Homo sapiens OX=9606 GN=LARP1 PE=1 SV=2	25.741	25.763	25.7685	25.083	25.2557	25.0483	26.3015	26.8148	26.2859	24.8748	25.2409	25.3033	25.6134	25.6529	25.2509	27.2999	27.4864	27.5645	25.5341	25.7402	25.5842	25.6755	25.5955	25.6661	25.1234	24.6864	25.4977	26.8364	27.0062	26.8148	25.7739	25.4643	25.7622	26.4978	26.6428	26.7196	25.3313	25.6444	25.3303	24.9775	25.1429	25.5341	25.6124
	Q96A72	Q96A72	Protein mago nashi homolog 2	1	MAGOHB	sp|Q96A72|MGN2_HUMAN Protein mago nashi homolog 2 OS=Homo sapiens OX=9606 GN=MAGOHB PE=1 SV=1	25.7367	25.1706	25.2374	25.0763	25.0747	24.8854	25.1308	25.0334	25.6795	24.3972	24.5768	25.3668	25.7983	26.1325	26.2685	26.357	26.2738	26.1514	25.4134	24.7471	25.2235	25.1699	25.5495	24.6592	25.0547	24.2346	26.318	25.7175	25.4527	25.8315	24.9327	25.3551	24.8058	25.5623	25.8745	25.755	24.8698	25.9886	25.614	24.9819	24.88	25.879	27.3707
	P20700	P20700	Lamin-B1	1	LMNB1	sp|P20700|LMNB1_HUMAN Lamin-B1 OS=Homo sapiens OX=9606 GN=LMNB1 PE=1 SV=2	25.7351	25.1317	25.0513	25.3361	25.8757	24.7385	23.5489	24.732	23.8649	25.5273	25.5194	25.1214	25.44	25.5008	26.1241	25.8236	25.5272	25.3967	24.8571	24.3797	24.5909	24.8605	25.0364	24.6375	25.7756	25.3168	26.4205	24.8445	24.8006	24.1812	25.9253	26.128	25.85	25.911	25.3671	25.5602	24.6276	25.8898	24.7535	25.2898	24.7184	24.4693	25.2203
	O43829	O43829	Zinc finger and BTB domain-containing protein 14	1	ZBTB14	sp|O43829|ZBT14_HUMAN Zinc finger and BTB domain-containing protein 14 OS=Homo sapiens OX=9606 GN=ZBTB14 PE=1 SV=2	25.7331	25.0801	25.4677	25.2459	27.3507	28.9043	24.6436	25.5325	24.7241	25.6007	27.7837	25.6153	25.0132	25.1931	25.293	26.1604	24.9894	26.533	24.2773	25.5466	25.0538	25.6184	25.013	24.5051	25.5705	25.146	26.9088	24.7829	25.0569	24.7662	25.1531	25.5417	20.948	25.6971	25.0285	26.1832	24.1684	25.4902	24.6173	27.697	25.708	26.1537	25.8768
	Q9BYG3	Q9BYG3	MKI67 FHA domain-interacting nucleolar phosphoprotein	1	NIFK	sp|Q9BYG3|MK67I_HUMAN MKI67 FHA domain-interacting nucleolar phosphoprotein OS=Homo sapiens OX=9606 GN=NIFK PE=1 SV=1	25.7306	25.1774	25.322	24.7939	25.3992	24.8576	24.6771	25.2722	24.9827	25.1826	25.2358	24.9058	24.7067	24.7438	25.7505	25.0785	24.9486	24.6698	25.2489	25.0645	25.4431	25.1465	25.5198	25.0793	25.4006	25.1116	26.1218	25.2255	24.8926	24.6751	25.3942	26.0559	25.4715	23.8652	23.4184	23.5235	24.9129	26.1262	25.1707	24.9283	24.7229	24.5121	25.0965
	P59998	P59998	Actin-related protein 2/3 complex subunit 4	1	ARPC4	sp|P59998|ARPC4_HUMAN Actin-related protein 2/3 complex subunit 4 OS=Homo sapiens OX=9606 GN=ARPC4 PE=1 SV=3	25.7306	24.9949	26.0801	25.9957	25.4992	26.0568	26.5424	25.1563	26.0883	25.2028	25.651	25.6815	23.6576	24.3598	25.0982	25.1732	25.2644	24.9482	25.619	25.6458	25.6048	25.6947	25.3236	25.2181	25.4633	25.9215	23.9795	25.2999	24.9916	25.1916	25.3745	25.401	25.438	24.4087	24.9256	24.4538	25.9851	24.4507	26.2685	25.4522	25.7163	24.6466	25.2917
	Q14690	Q14690	Protein RRP5 homolog	1	PDCD11	sp|Q14690|RRP5_HUMAN Protein RRP5 homolog OS=Homo sapiens OX=9606 GN=PDCD11 PE=1 SV=3	25.7255	24.7732	25.1104	24.6387	25.1595	24.8029	24.6039	25.3956	24.9136	25.2498	25.3972	25.1885	25.3138	25.1077	26.0233	26.1563	25.6855	25.9618	25.5916	25.8254	25.7484	26.2648	26.5858	25.7903	26.0301	25.5102	26.0882	25.7485	25.8642	25.6627	25.1056	25.4541	25.1497	25.1648	25.0393	25.3271	24.4058	25.5471	24.8589	25.0796	24.9441	24.7786	25.6789
	P16402	P16402	Histone H1.3	1	HIST1H1D	sp|P16402|H13_HUMAN Histone H1.3 OS=Homo sapiens OX=9606 GN=HIST1H1D PE=1 SV=2	25.7241	24.6582	25.0505	22.6796	23.9993	23.1293	24.6148	24.4037	24.6945	23.523	24.0504	23.8038	24.81	24.9761	26.2906	25.6375	24.6341	24.7632	25.2659	24.9805	25.4371	25.405	25.9377	25.7319	24.2679	24.9277	25.6708	24.8815	25.1714	24.9496	23.677	23.9731	23.7763	23.9156	23.7198	24.1889	23.6108	25.623	24.9128	22.2819	22.6647	26.1337	25.7955
	Q15154	Q15154	Pericentriolar material 1 protein	1	PCM1	sp|Q15154|PCM1_HUMAN Pericentriolar material 1 protein OS=Homo sapiens OX=9606 GN=PCM1 PE=1 SV=5	25.7196	25.9188	26.0181	26.7542	26.2502	26.5107	26.1818	24.9297	26.1362	25.8023	26.2133	25.9975	23.3608	23.5859	24.4981	25.008	24.8541	24.9037	25.2681	25.3814	24.9097	24.8315	24.5251	24.4831	26.1914	24.148	23.5511	25.4602	24.7182	25.4708	25.9308	26.1509	26.3335	24.6642	23.9901	22.6677	26.2967	22.9468	26.2311	26.4047	26.2992	27.5213	24.9642
	O15347	O15347	High mobility group protein B3	1	HMGB3	sp|O15347|HMGB3_HUMAN High mobility group protein B3 OS=Homo sapiens OX=9606 GN=HMGB3 PE=1 SV=4	25.7185	24.7025	25.5844	23.4646	24.8006	23.8914	23.8345	24.1873	24.9853	25.2637	24.0992	25.0212	25.3101	26.7196	25.6911	23.2392	23.5326	25.3537	25.2829	25.1832	26.181	26.1725	26.2106	26.2796	24.8694	24.8918	25.2762	25.007	23.193	25.0842	23.0529	24.7831	24.6181	25.5453	25.6658	25.5916	24.3429	26.2047	24.9904	23.9958	24.9194	23.3878	25.0946
	Q9Y2K1	Q9Y2K1	Zinc finger and BTB domain-containing protein 1	1	ZBTB1	sp|Q9Y2K1|ZBTB1_HUMAN Zinc finger and BTB domain-containing protein 1 OS=Homo sapiens OX=9606 GN=ZBTB1 PE=1 SV=3	25.7184	25.7721	25.7333	26.1089	26.1388	26.1273	25.9036	25.8573	26.8478	25.7101	27.6413	25.8034	25.3043	25.5827	25.3487	25.5717	25.8245	25.8411	25.4486	25.4013	25.4708	25.3135	25.382	25.3486	25.5161	25.8859	25.551	25.4563	25.6314	25.4429	25.7051	25.6985	25.6484	25.7835	25.4852	25.6542	25.8567	25.6641	26.5865	25.9272	25.8205	25.7651	21.9061
	P19022	P19022	Cadherin-2	1	CDH2	sp|P19022|CADH2_HUMAN Cadherin-2 OS=Homo sapiens OX=9606 GN=CDH2 PE=1 SV=4	25.7157	25.3373	25.8755	25.5837	25.919	25.66	25.855	25.1236	25.9956	24.8129	25.6421	25.2738	24.5137	25.3958	25.5943	25.5631	25.7823	25.6189	25.2223	25.1412	25.3272	25.3	25.04	24.9761	25.3357	24.1733	23.3936	25.547	24.8006	25.14	24.0571	25.2049	23.9276	24.5082	24.5482	23.4753	25.798	24.0021	25.9633	25.1599	25.8439	24.6141	24.7922
	Q58FF8	Q58FF8	Putative heat shock protein HSP 90-beta 2	1	HSP90AB2P	sp|Q58FF8|H90B2_HUMAN Putative heat shock protein HSP 90-beta 2 OS=Homo sapiens OX=9606 GN=HSP90AB2P PE=1 SV=2	25.699	25.8313	25.1351	26.3096	24.7447	26.5322	26.1083	25.2847	26.5311	25.1988	25.5039	24.3732	24.6888	25.2092	24.8026	25.9522	24.9115	25.1026	25.3197	25.6338	25.794	25.7201	24.9603	25.0591	24.3981	26.6285	24.0062	25.7644	25.1479	25.7946	24.5978	24.7958	24.9379	25.5566	25.9748	25.944	26.972	24.8421	26.5552	25.9429	25.5236	25.2183	25.9292
	P52926	P52926	High mobility group protein HMGI-C	1	HMGA2	sp|P52926|HMGA2_HUMAN High mobility group protein HMGI-C OS=Homo sapiens OX=9606 GN=HMGA2 PE=1 SV=1	25.6967	24.5523	24.6756	25.604	25.9625	25.0359	23.4325	24.3235	23.7172	22.1111	24.1608	24.9939	24.851	25.0152	25.9859	25.3756	25.0322	24.9328	24.4271	23.2584	23.1351	24.278	24.9072	23.2135	25.1341	25.1295	25.6772	25.3701	24.5956	24.4474	25.6116	26.2378	25.6412	25.6017	26.2295	25.6925	24.2752	25.7052	24.258	23.5009	24.5791	25.1441	25.0558
	P42285	P42285	Superkiller viralicidic activity 2-like 2	1	SKIV2L2	sp|P42285|MTREX_HUMAN Exosome RNA helicase MTR4 OS=Homo sapiens OX=9606 GN=MTREX PE=1 SV=3	25.6861	25.5841	25.0718	24.6746	24.8085	24.2835	24.9778	25.6359	25.9657	24.875	24.9266	24.7449	25.1877	25.0617	25.609	25.4326	25.4309	25.3402	25.381	25.3276	25.8375	25.6114	25.5428	25.6256	24.738	24.8483	25.31	25.6812	26.0623	25.744	25.2064	25.0438	24.872	24.107	24.6726	24.4698	22.5877	25.6646	25.4024	24.5098	24.6757	25.308	25.1885
	P09661	P09661	U2 small nuclear ribonucleoprotein A	1	SNRPA1	sp|P09661|RU2A_HUMAN U2 small nuclear ribonucleoprotein A OS=Homo sapiens OX=9606 GN=SNRPA1 PE=1 SV=2	25.681	26.031	25.7378	25.728	26.0611	25.5642	25.1551	25.2082	25.7561	25.3851	25.7971	25.6063	25.0309	26.1843	26.5669	26.667	25.5442	25.2448	26.0521	25.4129	25.8718	25.751	25.8693	26.1574	25.6843	25.2788	26.3945	25.9466	25.5476	25.8037	25.3078	26.0585	25.3465	26.0681	26.1621	26.4579	26.0675	26.6381	26.0253	26.12	25.7332	25.337	26.8767
	P11413	P11413	Glucose-6-phosphate 1-dehydrogenase	1	G6PD	sp|P11413|G6PD_HUMAN Glucose-6-phosphate 1-dehydrogenase OS=Homo sapiens OX=9606 GN=G6PD PE=1 SV=4	25.6799	25.1797	27.355	21.9806	23.0228	23.1504	24.7284	26.683	24.4979	23.2732	21.6484	22.5693	27.094	26.1484	26.8601	25.7228	26.796	26.322	25.257	25.1974	25.4118	25.3201	25.4647	25.0202	19.9755	26.8806	23.7063	25.2284	25.2834	25.2643	23.7312	23.2477	22.6421	23.6818	22.3575	22.4306	24.522	26.721	24.7899	22.5611	22.6402	22.5041	24.7426
	Q9Y294	Q9Y294	Histone chaperone ASF1A	1	ASF1A	sp|Q9Y294|ASF1A_HUMAN Histone chaperone ASF1A OS=Homo sapiens OX=9606 GN=ASF1A PE=1 SV=1	25.6793	25.2163	24.8492	24.8734	25.2875	24.9501	24.8797	25.0962	23.5851	25.7478	25.0226	25.5698	25.0842	24.4855	24.9363	25.9774	25.3155	25.4319	23.8605	24.3372	24.181	24.3823	24.0561	24.1807	25.7952	25.4449	25.8338	24.6798	24.1109	23.6724	25.1251	25.8849	24.9538	24.9757	24.678	24.8341	24.4969	24.8533	25.1072	24.338	24.4991	24.815	23.7378
	O95232	O95232	Luc7-like protein 3	1	LUC7L3	sp|O95232|LC7L3_HUMAN Luc7-like protein 3 OS=Homo sapiens OX=9606 GN=LUC7L3 PE=1 SV=2	25.6787	24.6302	24.9253	24.1787	25.3297	25.3341	25.5996	25.5626	25.8249	25.228	25.5728	24.9072	24.6244	25.0302	25.1118	25.6375	24.7588	24.9708	25.3136	24.962	24.9266	25.3532	25.146	24.6209	25.1755	25.7212	24.6537	24.9581	25.6332	25.9173	26.0284	25.9635	25.5587	26.4657	26.3566	26.7041	24.1096	24.1016	25.4386	24.4234	25.0132	23.8623	25.4584
	Q8TDN6	Q8TDN6	Ribosome biogenesis protein BRX1 homolog	1	BRIX1	sp|Q8TDN6|BRX1_HUMAN Ribosome biogenesis protein BRX1 homolog OS=Homo sapiens OX=9606 GN=BRIX1 PE=1 SV=2	25.6776	24.8053	24.5951	24.4679	24.8587	24.528	24.575	24.7016	24.7681	24.8912	24.6211	25.388	24.9217	25.0702	25.9185	24.7295	24.8285	24.6385	25.8285	25.8256	25.6547	26.4016	26.5689	26.5291	25.677	25.0829	26.0826	24.9171	25.1206	25.5352	25.0798	25.2456	24.9739	24.3544	24.7726	24.9155	24.373	25.5549	24.7745	24.6518	24.3895	24.7431	24.8746
	O75607	O75607	Nucleoplasmin-3	1	NPM3	sp|O75607|NPM3_HUMAN Nucleoplasmin-3 OS=Homo sapiens OX=9606 GN=NPM3 PE=1 SV=3	25.6742	25.6313	26.1295	26.1068	26.129	24.8144	25.6432	24.8592	25.6245	25.1251	25.6161	25.9766	24.4623	25.3589	25.5198	24.2474	24.8986	24.8793	26.2839	25.5461	26.6591	27.4803	27.6101	27.9469	25.6178	25.5973	26.0544	25.6089	24.5068	25.4158	23.378	24.9527	24.9874	24.4113	24.1644	23.7891	26.297	25.6137	25.4031	25.4212	25.5175	27.2467	25.2571
	Q9H0E2	Q9H0E2	Toll-interacting protein	1	TOLLIP	sp|Q9H0E2|TOLIP_HUMAN Toll-interacting protein OS=Homo sapiens OX=9606 GN=TOLLIP PE=1 SV=1	25.6721	25.8673	25.969	26.2433	26.1233	26.3774	26.1824	24.9307	26.2356	25.527	26.0584	25.3153	24.261	23.8676	24.8336	24.7986	24.6421	24.9542	25.362	25.1805	24.5598	24.7017	24.3603	24.7417	25.6424	24.8977	23.871	25.0547	23.9762	25.0797	25.2395	25.6535	25.9497	24.012	23.742	22.7896	26.2282	24.0778	26.166	25.9644	26.1312	27.0002	24.645
	Q9NW13	Q9NW13	RNA-binding protein 28	1	RBM28	sp|Q9NW13|RBM28_HUMAN RNA-binding protein 28 OS=Homo sapiens OX=9606 GN=RBM28 PE=1 SV=3	25.6714	24.9767	25.2779	25.3952	25.7204	25.2479	24.695	24.6442	24.4521	26.1445	26.1718	25.8288	25.3959	24.9452	25.6169	24.9108	25.056	24.9139	25.6873	25.8201	25.406	26.2923	26.483	26.157	26.5785	25.8333	26.3478	25.2675	25.2638	24.821	25.5628	26.4744	25.8079	25.8655	25.7508	25.8316	24.7024	25.4599	24.8061	25.5569	25.8424	27.7519	24.7434
	Q14684	Q14684	Ribosomal RNA processing protein 1 homolog B	1	RRP1B	sp|Q14684|RRP1B_HUMAN Ribosomal RNA processing protein 1 homolog B OS=Homo sapiens OX=9606 GN=RRP1B PE=1 SV=3	25.6673	25.65	25.4077	25.3573	25.3705	25.4648	25.1572	25.5904	24.9715	25.5224	25.8021	25.8068	26.1829	25.8385	26.069	25.5892	25.6254	25.72	26.197	26.1267	26.0415	26.8374	27.067	27.1064	26.0757	25.571	26.6009	25.6988	25.6361	25.2334	25.7488	25.8428	25.8322	25.5835	25.5043	25.8844	25.2029	26.0312	25.2168	25.1303	25.377	26.0294	25.3066
	Q14574	Q14574	Desmocollin-3	1	DSC3	sp|Q14574|DSC3_HUMAN Desmocollin-3 OS=Homo sapiens OX=9606 GN=DSC3 PE=1 SV=3	25.6666	25.8476	25.7815	25.8305	26.3498	26.8	26.5437	25.3426	26.2646	26.8123	25.5095	25.8372	26.8241	25.6363	25.7366	27.1452	26.1474	25.2321	27.2517	25.8616	24.726	26.0311	26.1787	27.4536	24.7637	30.2208	21.9192	26.3707	26.6284	26.162	26.0631	25.1624	25.032	24.7427	25.7321	25.3758	25.6174	26.4544	25.7682	24.6874	25.5911	26.2189	25.5542
	Q07065	Q07065	Cytoskeleton-associated protein 4	1	CKAP4	sp|Q07065|CKAP4_HUMAN Cytoskeleton-associated protein 4 OS=Homo sapiens OX=9606 GN=CKAP4 PE=1 SV=2	25.6657	25.3653	25.566	24.5011	25.0714	24.5337	24.8269	25.1212	25.1109	24.8272	24.8391	24.7678	25.5091	25.8321	23.8315	25.169	25.5927	25.2654	25.6053	25.0347	25.2559	25.8219	25.1406	25.2218	24.9195	27.3209	25.2167	24.4235	25.1994	24.4357	25.078	24.6692	24.6541	25.3288	25.2492	25.3486	25.1172	24.2181	25.2467	25.0498	25.1745	25.0076	25.2651
	P61163	P61163	Alpha-centractin	1	ACTR1A	sp|P61163|ACTZ_HUMAN Alpha-centractin OS=Homo sapiens OX=9606 GN=ACTR1A PE=1 SV=1	25.6657	25.7652	25.8521	25.8123	26.2542	25.9116	26.1681	25.0139	26.0094	25.255	25.7107	25.0436	24.5623	24.9305	25.4856	24.392	24.8514	24.8633	26.0054	25.4713	25.957	25.8388	25.4582	24.9883	25.3474	25.781	23.271	25.9076	25.4266	26.102	25.1963	25.3934	25.6099	24.7651	24.8812	24.7963	26.3464	24.5203	26.2043	25.2624	25.5693	24.7221	25.9809
	P09211	P09211	Glutathione S-transferase P	1	GSTP1	sp|P09211|GSTP1_HUMAN Glutathione S-transferase P OS=Homo sapiens OX=9606 GN=GSTP1 PE=1 SV=2	25.6642	25.4121	24.7707	24.6743	25.1613	24.5684	24.9438	25.2046	24.2128	24.7431	24.3326	25.0331	25.3004	26.5022	24.4988	25.6351	25.6369	25.6115	25.0552	24.9782	25.8051	26.2636	24.5074	25.4782	23.7451	28.9001	24.9336	24.6763	24.9581	24.9037	24.7374	23.4635	23.6257	24.5694	25.6554	25.2198	24.542	23.9287	25.4182	24.2731	24.283	26.3756	23.9056
	P29401	P29401	Transketolase	1	TKT	sp|P29401|TKT_HUMAN Transketolase OS=Homo sapiens OX=9606 GN=TKT PE=1 SV=3	25.6527	25.3522	24.9294	25.0709	25.6354	24.5061	24.9224	24.0672	25.1671	24.7465	24.7495	25.1854	24.47	25.8555	22.8737	24.5856	25.1057	24.815	24.8333	24.0438	25.375	25.9399	24.0934	25.5685	24.8284	27.0724	24.793	24.8225	24.5174	24.1878	25.1316	24.8749	24.3629	25.7213	25.5572	24.7741	24.848	22.2196	24.8375	25.0136	24.9033	25.3583	23.1503
	O43633	O43633	Charged multivesicular body protein 2a	1	CHMP2A	sp|O43633|CHM2A_HUMAN Charged multivesicular body protein 2a OS=Homo sapiens OX=9606 GN=CHMP2A PE=1 SV=1	25.6524	25.9766	25.8892	25.2989	24.5976	25.3665	24.9244	24.6018	24.1557	25.9719	26.2308	25.8998	25.5325	24.6616	25.4074	23.5455	24.8637	24.9481	24.9327	24.3129	24.1865	25.3065	25.6434	25.7587	25.6976	25.0687	26.6407	23.5948	23.631	23.2373	24.7445	25.6697	25.5423	24.8038	25.2558	25.7546	25.3403	25.4334	24.6389	26.2372	26.3265	27.0341	24.3003
	P84077	P84077	ADP-ribosylation factor 1	1	ARF1	sp|P84077|ARF1_HUMAN ADP-ribosylation factor 1 OS=Homo sapiens OX=9606 GN=ARF1 PE=1 SV=2	25.6496	25.5393	24.5229	22.8767	26.038	22.9585	24.7989	24.6724	23.1279	22.6628	23.2259	22.2048	24.1413	24.6414	25.1154	25.0037	25.1925	24.8435	24.5515	24.5541	25.6017	26.0799	25.7643	24.4898	22.2383	28.4717	21.8224	24.991	25.2123	25.3765	23.1277	23.0257	22.2575	24.2922	24.2761	22.218	24.1144	23.9256	24.2299	23.2978	22.9587	23.3411	25.4804
	Q9P219	Q9P219	Protein Daple	1	CCDC88C	sp|Q9P219|DAPLE_HUMAN Protein Daple OS=Homo sapiens OX=9606 GN=CCDC88C PE=1 SV=3	25.6495	26.2213	25.9676	26.0474	27.2468	27.1642	26.4454	25.5133	25.527	25.9996	26.3288	26.8355	25.0543	24.714	25.1442	25.1813	24.8146	24.4536	25.4797	25.5163	25.6331	25.458	25.3787	26.0776	26.4582	25.9528	25.2665	24.4937	24.6683	24.2559	26.2065	26.1617	26.8192	25.4915	25.6324	25.3195	26.0755	24.5516	25.818	25.6063	26.9345	26.5703	24.5892
	P60842	P60842	Eukaryotic initiation factor 4A-I	1	EIF4A1	sp|P60842|IF4A1_HUMAN Eukaryotic initiation factor 4A-I OS=Homo sapiens OX=9606 GN=EIF4A1 PE=1 SV=1	25.635	25.6214	25.4351	25.2496	25.2737	24.5856	25.9708	25.7676	25.9466	25.7157	25.4773	25.6309	25.7483	26.1765	25.4404	32.3554	32.514	32.6026	25.6103	25.7958	26.1516	26.5261	26.4539	26.5939	24.4036	25.9792	24.9254	29.4254	29.9534	29.7413	24.3067	24.198	23.8852	25.804	25.9287	26.5008	25.7015	25.7054	25.8309	25.1411	25.2412	24.413	26.5487
	Q02880	Q02880	DNA topoisomerase 2-beta	1	TOP2B	sp|Q02880|TOP2B_HUMAN DNA topoisomerase 2-beta OS=Homo sapiens OX=9606 GN=TOP2B PE=1 SV=3	25.632	19.8782	23.4578	22.8867	23.7086	22.8502	22.3818	22.4148	22.6969	23.3625	22.7801	19.6723	24.8386	23.5287	27.1425	26.6978	24.1203	25.0081	24.3986	22.8123	22.1258	24.1972	26.4936	20.4717	22.6091	22.0864	23.5566	25.7317	24.879	24.6337	23.7077	25.3347	23.0034	24.5304	22.9226	22.4472	22.2789	25.3035	24.0769	22.9849	23.2581	20.6315	26.2953
	Q9H0B6	Q9H0B6	Kinesin light chain 2	1	KLC2	sp|Q9H0B6|KLC2_HUMAN Kinesin light chain 2 OS=Homo sapiens OX=9606 GN=KLC2 PE=1 SV=1	25.629	25.8692	25.8219	27.007	27.4862	27.0389	25.628	25.4176	25.628	26.6861	28.8564	28.8699	25.5609	25.5227	25.1823	25.1936	25.4657	25.2406	25.4125	25.3313	25.2466	25.524	25.4671	25.6683	26.8067	27.9861	31.7996	25.1662	25.0522	24.984	27.3723	26.9743	29.7481	25.4506	26.1279	26.0732	25.8197	25.5004	25.7235	26.9668	26.7162	25.8671	24.7939
	P26641	P26641	Elongation factor 1-gamma	1	EEF1G	sp|P26641|EF1G_HUMAN Elongation factor 1-gamma OS=Homo sapiens OX=9606 GN=EEF1G PE=1 SV=3	25.625	25.4171	25.7875	26.215	26.0993	26.2027	26.2889	25.8081	26.0967	25.929	26.0927	25.0304	25.3225	25.6408	25.1412	25.3438	25.3863	25.605	25.7024	25.8983	25.7343	25.9952	25.3896	25.0112	25.5338	26.2782	24.7375	25.7993	25.7867	26.0397	26.2964	25.6908	26.0802	25.7113	25.3472	25.3651	26.0486	24.2479	26.3825	25.7004	26.0058	25.1587	25.7497
	P62633	P62633	Cellular nucleic acid-binding protein	1	CNBP	sp|P62633|CNBP_HUMAN Cellular nucleic acid-binding protein OS=Homo sapiens OX=9606 GN=CNBP PE=1 SV=1	25.6214	26.2293	26.414	26.3692	26.6054	26.8164	26.1201	26.6344	25.5304	27.2458	27.6601	26.5192	26.5777	26.2287	25.5759	25.2216	26.6129	26.3778	26.1458	25.7958	26.3315	26.4912	26.5671	26.8965	26.822	28.0717	27.1874	25.7592	26.5693	25.7455	26.6041	26.9061	26.71	26.8379	27.1249	27.489	25.5403	26.4821	24.4773	26.1805	26.747	28.0377	25.6073
	P35232	P35232	Prohibitin	1	PHB	sp|P35232|PHB_HUMAN Prohibitin OS=Homo sapiens OX=9606 GN=PHB PE=1 SV=1	25.6051	24.9999	24.707	22.7243	24.8675	22.9527	25.0491	24.7826	25.252	24.7094	23.2219	24.2529	24.4275	25.8855	25.0979	25.1295	24.88	25.1317	24.05	24.5854	25.0634	25.463	24.5459	23.9182	24.3124	25.1542	23.6543	24.5419	24.634	25.1985	24.02	23.4414	23.6444	24.7813	25.0155	24.3799	24.6919	23.3453	25.2958	24.4526	24.0195	26.0347	24.5452
	P56537	P56537	Eukaryotic translation initiation factor 6	1	EIF6	sp|P56537|IF6_HUMAN Eukaryotic translation initiation factor 6 OS=Homo sapiens OX=9606 GN=EIF6 PE=1 SV=1	25.6018	24.8573	25.2017	24.8843	25.3543	25.3534	24.8815	24.8367	24.4457	24.8633	24.7797	24.799	24.9589	25.3682	26.0579	25.1814	25.0019	25.0023	25.5173	25.0581	25.0348	25.4289	25.9082	25.5391	24.9272	26.0838	25.289	25.547	25.7721	24.9285	24.9047	25.4522	24.8164	25.108	25.227	25.0548	24.8353	25.6411	24.6068	25.1133	24.767	25.0411	25.8762
	Q14254	Q14254	Flotillin-2	1	FLOT2	sp|Q14254|FLOT2_HUMAN Flotillin-2 OS=Homo sapiens OX=9606 GN=FLOT2 PE=1 SV=2	25.601	25.6004	25.866	25.6274	25.7884	25.4817	24.8865	24.0984	24.478	25.5928	25.9079	25.4446	24.6215	24.129	24.4171	25.089	24.5136	24.2676	24.1403	24.0859	24.1228	23.701	23.8296	23.8122	25.6546	24.1302	24.6276	23.8088	23.6956	24.3294	26.3796	25.6847	26.3368	24.1804	23.5361	23.84	25.3306	24.861	25.2854	25.4738	24.9401	24.4881	23.7013
	P0DPH8	P0DPH8;P0DPH7;Q6PEY2;Q9NY65	Tubulin alpha-3E chain;Tubulin alpha-8 chain	4	TUBA3E	sp|P0DPH8|TBA3D_HUMAN Tubulin alpha-3D chain OS=Homo sapiens OX=9606 GN=TUBA3D PE=1 SV=1;sp|P0DPH7|TBA3C_HUMAN Tubulin alpha-3C chain OS=Homo sapiens OX=9606 GN=TUBA3C PE=1 SV=1;sp|Q6PEY2|TBA3E_HUMAN Tubulin alpha-3E chain OS=Homo sapiens OX=9606 GN=TUBA3E	25.6006	25.345	25.5207	26.7208	27.0799	26.6839	27.6158	27.1444	27.395	27.6137	26.4489	26.3709	25.4997	25.258	25.0779	27.6518	25.8581	26.8795	25.7982	26.8675	25.6056	26.6487	26.309	23.9613	25.9653	26.1158	24.0644	25.7931	26.518	27.1636	27.1139	26.0029	25.5302	27.4179	26.0103	25.7392	26.3126	25.4521	28.2895	26.6547	26.3971	27.7545	27.0147
	Q9BVJ6	Q9BVJ6	U3 small nucleolar RNA-associated protein 14 homolog A	1	UTP14A	sp|Q9BVJ6|UT14A_HUMAN U3 small nucleolar RNA-associated protein 14 homolog A OS=Homo sapiens OX=9606 GN=UTP14A PE=1 SV=1	25.5997	24.7793	24.8823	25.0653	24.8474	24.6698	24.2748	24.4695	24.3707	24.8004	24.8754	24.6014	24.2676	23.7549	26.0336	25.3225	25.0594	25.0324	25.265	24.801	24.8862	25.0184	25.8129	24.8127	24.3657	24.504	24.5891	25.1436	24.4538	24.4117	23.9768	25.271	24.9602	24.3216	24.2871	24.1841	24.6257	25.8198	24.839	24.7091	24.8206	23.6866	25.633
	Q8TD17	Q8TD17	Zinc finger protein 398	1	ZNF398	sp|Q8TD17|ZN398_HUMAN Zinc finger protein 398 OS=Homo sapiens OX=9606 GN=ZNF398 PE=1 SV=1	25.5967	25.405	25.63	25.1586	25.6167	22.7319	26.0592	26.467	25.9112	25.9047	24.692	26.018	26.0957	26.064	25.8993	26.8044	26.6956	26.6007	25.9042	25.884	25.9376	25.9667	25.796	25.6946	25.8601	25.6923	27.3241	26.1914	26.5571	26.6267	25.8757	25.9637	25.7603	25.796	26.4407	26.8502	25.8736	25.9833	25.9277	25.6753	26.2381	25.8652	26.6678
	Q9UPN4	Q9UPN4	Centrosomal protein of 131 kDa	1	CEP131	sp|Q9UPN4|CP131_HUMAN Centrosomal protein of 131 kDa OS=Homo sapiens OX=9606 GN=CEP131 PE=1 SV=3	25.5916	25.7408	26.0218	27.2934	26.4178	27.2006	25.918	24.5362	26.271	25.6968	26.1198	26.6625	22.6693	21.9236	23.3449	23.9945	24.8708	24.5652	25.0045	24.4127	24.4218	23.7006	23.3437	23.2562	26.0798	24.3683	22.6909	24.0559	23.7133	23.1598	26.406	26.2157	26.2593	22.6987	23.618	22.7291	26.0408	23.0301	25.9581	26.2848	27.3998	24.3041	23.6764
	P14625	P14625	Endoplasmin	1	HSP90B1	sp|P14625|ENPL_HUMAN Endoplasmin OS=Homo sapiens OX=9606 GN=HSP90B1 PE=1 SV=1	25.586	24.9673	25.1982	25.4595	25.4608	25.2415	25.9795	25.4774	26.2418	25.3769	25.596	24.6695	25.3857	26.086	25.4916	25.8113	25.4581	25.9447	25.0304	25.6017	25.6121	26.2095	25.553	25.0688	24.8471	26.7353	24.8017	25.7395	25.5969	26.0924	25.4948	25.1944	24.6742	25.5367	25.7401	25.3351	25.471	23.5091	26.2168	25.1877	25.5931	25.9946	25.7279
	O15371	O15371	Eukaryotic translation initiation factor 3 subunit D	1	EIF3D	sp|O15371|EIF3D_HUMAN Eukaryotic translation initiation factor 3 subunit D OS=Homo sapiens OX=9606 GN=EIF3D PE=1 SV=1	25.5816	25.1147	24.8067	25.4973	24.5205	25.442	25.9592	25.2297	25.8789	25.1999	25.2629	25.4336	24.7857	25.1472	25.454	26.2908	26.696	27.2266	25.6235	25.4264	26.3375	24.651	25.3602	24.4243	24.61	26.0772	23.9548	27.1188	27.6057	27.5222	24.5154	25.233	24.4907	25.1825	25.2049	24.0911	25.7346	24.6177	25.4947	24.6619	25.2689	24.4221	25.136
	Q8NI36	Q8NI36	WD repeat-containing protein 36	1	WDR36	sp|Q8NI36|WDR36_HUMAN WD repeat-containing protein 36 OS=Homo sapiens OX=9606 GN=WDR36 PE=1 SV=1	25.5801	23.9761	24.2823	24.4666	24.5963	24.0964	23.7956	24.6363	24.6913	25.7748	24.2831	24.8334	24.7896	24.275	26.1875	25.7534	24.5014	24.9073	25.1414	24.804	23.3798	25.3117	25.9695	25.0534	24.0828	24.0634	25.0913	25.6486	25.8386	25.5176	24.0341	25.2811	24.6832	24.6481	24.1005	25.037	22.1039	25.8134	24.7123	24.3556	24.8418	24.8606	26.0059
	O15230	O15230	Laminin subunit alpha-5	1	LAMA5	sp|O15230|LAMA5_HUMAN Laminin subunit alpha-5 OS=Homo sapiens OX=9606 GN=LAMA5 PE=1 SV=8	25.577	25.2921	25.0016	25.4773	25.46	25.5205	25.5894	25.4855	26.3951	25.5075	26.4852	25.3005	26.2284	26.4706	25.6529	25.3037	24.7084	25.5506	25.0981	25.3525	25.5497	26.2591	25.9544	25.4896	25.7527	25.5427	25.2765	25.3981	24.7803	25.7853	23.5983	26.2786	25.0395	25.5184	25.6132	25.6621	25.0488	25.3266	25.7675	25.379	25.4721	25.3428	26.1825
	O75643	O75643	U5 small nuclear ribonucleoprotein 200 kDa helicase	1	SNRNP200	sp|O75643|U520_HUMAN U5 small nuclear ribonucleoprotein 200 kDa helicase OS=Homo sapiens OX=9606 GN=SNRNP200 PE=1 SV=2	25.5717	24.8053	24.8531	24.784	25.383	24.8327	25.1043	25.3012	25.0534	24.7774	24.6876	25.1067	25.2168	25.1984	25.8229	25.4193	25.2721	25.402	28.4063	29.0142	28.8576	24.9536	25.4634	24.5862	24.72	24.4312	24.7517	25.5867	25.7186	25.7253	24.6718	25.2398	24.9562	29.0961	29.1746	29.4485	25.0309	25.7551	25.1696	26.0681	26.1148	25.7574	25.7531
	Q13263	Q13263	Transcription intermediary factor 1-beta	1	TRIM28	sp|Q13263|TIF1B_HUMAN Transcription intermediary factor 1-beta OS=Homo sapiens OX=9606 GN=TRIM28 PE=1 SV=5	25.5698	25.5538	25.4305	25.7867	25.512	25.1316	25.4816	25.5185	25.3645	24.7025	24.8814	25.2868	24.9812	25.4877	25.2872	25.3989	25.6049	25.2991	25.3744	25.1771	25.447	25.3629	25.5589	25.3572	24.8403	24.9801	25.2848	25.7081	25.529	25.739	25.2924	25.1939	25.1509	25.0438	25.2428	25.2554	26.037	25.3594	25.4853	25.0722	25.2549	25.8644	25.4511
	Q04917	Q04917	14-3-3 protein eta	1	YWHAH	sp|Q04917|1433F_HUMAN 14-3-3 protein eta OS=Homo sapiens OX=9606 GN=YWHAH PE=1 SV=4	25.5662	25.7061	25.8783	25.8868	25.6397	25.6153	25.5682	25.3286	25.1679	25.4939	25.7257	25.7166	25.4847	25.9552	25.8277	24.9609	25.4855	25.2582	25.5636	25.2724	25.3877	25.3907	25.2302	25.9787	25.2096	25.5396	25.5368	25.739	25.5482	25.4577	25.3516	25.3199	25.4412	25.4927	25.9565	25.7333	26.0705	25.3375	25.1705	25.4036	25.4556	26.6611	25.4186
	Q9NX24	Q9NX24	H/ACA ribonucleoprotein complex subunit 2	1	NHP2	sp|Q9NX24|NHP2_HUMAN H/ACA ribonucleoprotein complex subunit 2 OS=Homo sapiens OX=9606 GN=NHP2 PE=1 SV=1	25.5653	25.5218	25.3386	24.1853	24.8413	24.486	25.5112	25.6429	25.4639	24.9412	23.8231	25.1036	25.8075	25.4816	26.3361	25.6516	25.592	25.6318	26.2376	25.8844	26.0114	25.9541	26.2834	26.2248	25.2952	24.661	25.2492	25.7014	25.5035	25.4063	24.478	24.8817	25.2948	24.6783	24.6528	25.0352	25.4373	26.2074	25.3491	24.3428	23.7287	24.7946	25.9631
	P43246	P43246	DNA mismatch repair protein Msh2	1	MSH2	sp|P43246|MSH2_HUMAN DNA mismatch repair protein Msh2 OS=Homo sapiens OX=9606 GN=MSH2 PE=1 SV=1	25.5621	25.3988	25.4311	25.0072	25.1181	24.8081	25.2081	25.5815	25.4494	25.2785	25.2056	24.4332	25.8826	25.4225	25.0322	25.5719	25.8969	26.0598	25.0405	25.2231	25.2085	25.0945	25.0202	24.7012	24.6205	24.6027	25.2931	25.0268	25.5808	25.4459	25.0602	24.4556	24.8673	25.1939	24.9227	25.6877	24.9169	25.4891	25.1769	24.4309	24.2459	22.4424	25.0431
	P47755	P47755	F-actin-capping protein subunit alpha-2	1	CAPZA2	sp|P47755|CAZA2_HUMAN F-actin-capping protein subunit alpha-2 OS=Homo sapiens OX=9606 GN=CAPZA2 PE=1 SV=3	25.5563	24.162	24.8922	25.535	25.4817	25.9591	26.448	25.5812	26.2804	25.9878	25.9883	24.7699	24.4724	23.7442	24.455	25.8062	24.7318	25.1238	24.4289	25.5729	24.4089	25.1428	24.7644	22.0764	25.1478	24.7559	21.232	25.1418	24.8404	25.5538	24.6136	25.4906	24.7257	25.2088	24.2638	24.3369	25.4479	23.0469	26.5419	25.3309	25.6515	24.3476	25.2171
	Q86W42	Q86W42	THO complex subunit 6 homolog	1	THOC6	sp|Q86W42|THOC6_HUMAN THO complex subunit 6 homolog OS=Homo sapiens OX=9606 GN=THOC6 PE=1 SV=1	25.5545	25.4109	25.2112	25.615	25.9718	26.2314	25.0848	25.3048	25.6133	24.8188	24.926	25.092	25.6087	25.5813	26.019	25.1555	25.3363	25.384	25.2288	24.8603	25.1755	24.5605	25.079	24.6582	25.3393	24.5195	24.6427	25.3522	25.5099	25.5709	24.757	25.5438	25.1364	25.2845	25.8782	26.0494	25.247	25.5449	24.9408	25.2253	24.9721	25.1353	27.8499
	Q9UQ80	Q9UQ80	Proliferation-associated protein 2G4	1	PA2G4	sp|Q9UQ80|PA2G4_HUMAN Proliferation-associated protein 2G4 OS=Homo sapiens OX=9606 GN=PA2G4 PE=1 SV=3	25.5523	25.68	24.996	24.5163	24.984	24.4648	25.1681	25.5671	25.2682	24.3249	24.5508	24.8646	25.4321	26.1994	25.0601	25.0267	25.3899	25.3226	25.4239	25.0842	25.6628	25.7074	25.1126	25.5523	24.3218	25.1109	24.6433	25.434	25.4031	25.1807	24.6134	24.5199	24.5626	25.1147	25.3282	25.0488	25.2825	24.7511	25.3031	25.1967	24.9495	24.1934	25.0692
	Q9P035	Q9P035	Very-long-chain (3R)-3-hydroxyacyl-CoA dehydratase 3	1	HACD3	sp|Q9P035|HACD3_HUMAN Very-long-chain (3R)-3-hydroxyacyl-CoA dehydratase 3 OS=Homo sapiens OX=9606 GN=HACD3 PE=1 SV=2	25.5511	25.0353	24.8787	25.059	25.8812	24.761	25.6469	25.5219	25.8317	24.9562	24.0984	24.2296	25.9697	25.3105	25.1211	25.8976	25.4799	25.9072	24.5585	25.5007	24.7482	26.1047	26.0855	24.98	24.8088	25.242	24.9428	25.5406	26.156	26.0855	24.6254	24.7939	25.099	25.409	24.7404	25.5044	25.2369	24.9839	26.1185	25.3593	25.6185	24.7464	25.2927
	Q9UQN3	Q9UQN3	Charged multivesicular body protein 2b	1	CHMP2B	sp|Q9UQN3|CHM2B_HUMAN Charged multivesicular body protein 2b OS=Homo sapiens OX=9606 GN=CHMP2B PE=1 SV=1	25.548	25.8629	25.7918	25.4548	25.1254	25.5706	24.4204	25.0383	24.5658	26.2291	26.2294	26.622	26.282	25.7247	25.215	25.0288	25.5744	25.3662	24.5456	24.4985	24.2214	25.4354	25.5127	25.7403	26.6914	26.0445	27.4509	24.6347	24.8303	24.2814	26.6457	25.8876	26.2126	26.453	25.8781	25.7499	25.3311	25.4356	24.8831	26.3359	26.0304	26.6783	24.9223
	P07737	P07737	Profilin-1	2	PFN1	sp|P07737|PROF1_HUMAN Profilin-1 OS=Homo sapiens OX=9606 GN=PFN1 PE=1 SV=2	25.5357	25.1398	25.2525	25.5298	26.3083	25.4118	25.2838	25.1365	26.005	26.4341	25.9161	25.162	25.5183	26.4962	24.8985	25.4709	25.5373	25.4184	25.084	24.8336	25.7678	26.1737	25.2116	24.6701	25.0598	28.0073	24.4225	25.2421	25.2358	25.3047	25.8388	24.8645	24.7962	26.3086	26.3419	25.9787	25.6459	23.4404	25.6798	25.3933	25.2659	24.1444	24.3841
	Q9BQI0	Q9BQI0	Allograft inflammatory factor 1-like	1	AIF1L	sp|Q9BQI0|AIF1L_HUMAN Allograft inflammatory factor 1-like OS=Homo sapiens OX=9606 GN=AIF1L PE=1 SV=1	25.5323	25.3552	25.8663	26.6835	26.3574	26.3418	25.5757	23.6505	25.246	25.4836	26.2543	26.5722	22.945	23.1814	24.6104	24.7023	23.4054	22.6012	25.0135	24.6215	24.5527	23.0642	24.1317	24.5706	26.0992	24.8309	22.5429	24.7237	24.601	24.696	26.0887	25.9403	25.6354	22.4619	24.0597	22.7376	25.5126	23.3052	25.4562	25.9752	25.8801	26.3529	24.869
	P18846	P18846	Cyclic AMP-dependent transcription factor ATF-1	1	ATF1	sp|P18846|ATF1_HUMAN Cyclic AMP-dependent transcription factor ATF-1 OS=Homo sapiens OX=9606 GN=ATF1 PE=1 SV=2	25.5206	25.1122	25.3135	23.2464	23.5652	24.2528	24.3865	24.9612	24.3263	22.8609	22.8364	23.2218	25.4361	25.6453	25.6743	25.4166	25.448	25.8972	24.5738	24.6327	24.9704	24.5452	24.4137	24.3193	24.3689	24.8491	25.2528	25.0746	25.1624	24.8042	24.1658	24.0086	24.0984	24.4194	25.4009	25.1005	24.9081	25.3969	24.7556	23.9738	23.6417	25.465	25.0593
	Q5SSJ5	Q5SSJ5	Heterochromatin protein 1-binding protein 3	1	HP1BP3	sp|Q5SSJ5|HP1B3_HUMAN Heterochromatin protein 1-binding protein 3 OS=Homo sapiens OX=9606 GN=HP1BP3 PE=1 SV=1	25.5151	25.3834	25.4739	24.3257	24.4551	24.4301	25.0332	25.4146	25.0288	24.336	24.8692	24.9011	25.0436	25.6195	25.5718	25.6687	25.4424	25.3035	25.9574	25.9257	25.9203	26.1002	26.1873	26.0222	25.1768	25.0298	25.4756	25.4899	25.1482	25.1172	25.0635	24.6568	24.6741	24.0322	25.5511	25.1347	24.8237	25.2139	25.0375	23.9543	24.3137	25.2074	24.1841
	Q9BQG0	Q9BQG0	Myb-binding protein 1A	1	MYBBP1A	sp|Q9BQG0|MBB1A_HUMAN Myb-binding protein 1A OS=Homo sapiens OX=9606 GN=MYBBP1A PE=1 SV=2	25.5088	24.7441	24.5462	25.2438	25.7165	25.5596	24.6885	25.5166	25.4501	25.5235	25.7776	25.368	25.8717	25.2237	25.8671	26.0778	25.1867	25.3655	25.846	25.9329	26.0137	27.2973	27.4602	26.8181	25.6949	25.5031	26.2005	25.4495	25.6155	25.4685	25.8482	26.0103	25.452	25.6058	25.5102	25.4775	24.8519	25.523	25.6694	25.1957	25.2083	25.314	25.7677
	P28289	P28289	Tropomodulin-1	2	TMOD1	sp|P28289|TMOD1_HUMAN Tropomodulin-1 OS=Homo sapiens OX=9606 GN=TMOD1 PE=1 SV=1	25.5001	25.307	25.7957	26.3891	25.8272	25.8408	26.2232	25.0068	26.0236	25.5338	25.6022	24.2102	23.3572	23.0171	24.3564	25.409	24.6233	24.5779	24.7822	24.5605	24.3867	23.6452	24.2193	23.4864	25.6701	23.7531	22.4276	24.6222	24.4263	25.2	24.7453	25.4844	25.6213	23.9221	23.171	20.7429	25.751	22.5772	26.3998	25.6522	25.7968	25.2364	25.035
	Q9H0H5	Q9H0H5	Rac GTPase-activating protein 1	1	RACGAP1	sp|Q9H0H5|RGAP1_HUMAN Rac GTPase-activating protein 1 OS=Homo sapiens OX=9606 GN=RACGAP1 PE=1 SV=1	25.4999	25.5993	25.7728	25.8996	25.908	26.0074	25.7682	25.4465	25.9572	25.4976	25.7868	25.7665	25.4149	24.8936	25.241	25.2728	25.2117	25.2664	25.4544	25.319	24.8944	25.3551	25.1334	25.1609	25.6092	24.6272	25.4568	25.2588	25.0806	25.2402	25.5902	25.2828	25.7072	25.2175	25.5979	25.2639	25.9569	25.005	25.9796	25.3748	25.4326	26.0161	25.2356
	Q14444	Q14444	Caprin-1	1	CAPRIN1	sp|Q14444|CAPR1_HUMAN Caprin-1 OS=Homo sapiens OX=9606 GN=CAPRIN1 PE=1 SV=2	25.4879	25.8956	25.7344	26.3848	26.7341	26.6476	26.3165	27.0118	26.0296	26.2886	26.6588	27.5234	25.6929	25.7376	24.558	26.6214	26.5822	26.1579	26.457	26.5538	26.5052	26.2656	26.4555	26.6815	27.1691	26.1991	27.5837	26.6024	27.1946	26.9822	27.8153	26.8805	27.7146	26.2201	26.9046	26.5725	25.6324	26.3575	25.6819	25.9708	26.2341	24.9529	25.2939
	P27348	P27348	14-3-3 protein theta	1	YWHAQ	sp|P27348|1433T_HUMAN 14-3-3 protein theta OS=Homo sapiens OX=9606 GN=YWHAQ PE=1 SV=1	25.487	25.8226	25.6601	25.7239	25.6442	25.4645	25.554	25.3573	25.3274	25.5534	25.423	25.2953	25.4451	25.251	24.9849	24.8301	25.6648	25.7002	24.8893	24.8756	25.0032	25.3299	24.9419	25.0076	25.3271	25.856	25.3486	25.5085	25.7991	25.5071	25.8869	25.6819	25.679	25.4804	25.8688	26.1016	25.7055	24.9847	25.3174	25.254	25.3355	26.0649	25.2945
	Q9HDC9	Q9HDC9	Adipocyte plasma membrane-associated protein	1	APMAP	sp|Q9HDC9|APMAP_HUMAN Adipocyte plasma membrane-associated protein OS=Homo sapiens OX=9606 GN=APMAP PE=1 SV=2	25.4752	25.1515	25.7535	26.8186	24.7606	22.1823	23.8881	24.9028	24.6941	20.3843	24.4669	22.1142	25.7643	27.0973	24.6916	24.9629	27.0473	26.0774	25.3792	24.3889	24.9313	24.7042	24.6695	25.584	25.1807	24.5851	25.8733	24.8168	25.8815	25.1867	25.1902	25.2701	25.6602	24.5603	25.737	23.9703	25.1933	25.3815	23.9333	22.8252	25.2337	24.7432	23.7347
	O95816	O95816	BAG family molecular chaperone regulator 2	1	BAG2	sp|O95816|BAG2_HUMAN BAG family molecular chaperone regulator 2 OS=Homo sapiens OX=9606 GN=BAG2 PE=1 SV=1	25.4747	24.7424	24.9818	26.0084	25.1247	26.0757	26.2922	25.1941	26.2218	26.0012	25.6966	24.555	25.5267	24.9287	24.5493	25.2276	24.369	25.4334	24.7916	25.7996	24.2497	25.0822	24.5757	23.3287	24.6527	23.2843	25.4722	24.3823	25.1814	26.1036	24.759	26.2442	24.6381	27.1787	26.0953	25.5978	25.807	26.475	27.1593	25.2393	25.0044	24.1162	25.5899
	Q8N163	Q8N163	Cell cycle and apoptosis regulator protein 2	1	CCAR2	sp|Q8N163|CCAR2_HUMAN Cell cycle and apoptosis regulator protein 2 OS=Homo sapiens OX=9606 GN=CCAR2 PE=1 SV=2	25.4684	25.3513	25.4668	25.6475	25.009	24.988	25.4029	25.6044	25.3985	25.35	25.0885	25.4154	24.7548	25.2971	25.2994	25.1776	25.2338	25.3154	25.0892	24.9309	25.0556	24.9062	24.9288	24.5126	24.9537	24.9471	24.8376	25.1436	25.0876	24.9126	24.9077	24.8069	24.6375	25.4293	25.3634	25.3082	25.7759	26.1781	25.7483	25.3858	25.5814	24.487	24.9273
	P61964	P61964	WD repeat-containing protein 5	1	WDR5	sp|P61964|WDR5_HUMAN WD repeat-containing protein 5 OS=Homo sapiens OX=9606 GN=WDR5 PE=1 SV=1	25.4667	25.5169	25.6305	25.917	25.6829	25.828	25.2119	25.767	25.0028	26.7301	26.0541	26.0381	26.2778	25.3251	25.4499	25.5403	26.021	25.9455	25.5341	25.4211	25.445	25.5046	25.5674	25.6808	26.1889	25.7945	26.5473	25.0082	25.211	24.9693	26.518	26.172	25.9682	26.4011	26.807	26.5487	25.5422	25.7653	25.6874	25.9579	25.8012	26.6641	25.4278
	Q9UKR3	Q9UKR3	Kallikrein-13	1	KLK13	sp|Q9UKR3|KLK13_HUMAN Kallikrein-13 OS=Homo sapiens OX=9606 GN=KLK13 PE=2 SV=1	25.4667	25.6532	25.538	26.7817	26.8598	26.62	25.2339	25.0205	25.2608	26.4506	29.8556	29.6313	25.4047	25.3772	25.2446	25.0845	25.2276	24.9848	25.0913	24.9837	24.6242	25.3406	25.1634	25.4899	30.4652	34.9229	27.1297	25.0146	25.0825	24.8295	26.8943	26.0813	27.2887	26.2275	26.2301	26.2626	25.4282	25.2075	25.2809	30.7813	27.1942	29.4126	24.6629
	O15042	O15042	U2 snRNP-associated SURP motif-containing protein	1	U2SURP	sp|O15042|SR140_HUMAN U2 snRNP-associated SURP motif-containing protein OS=Homo sapiens OX=9606 GN=U2SURP PE=1 SV=2	25.4637	22.7315	24.8357	23.7962	24.6632	23.9925	23.9322	25.2191	24.5405	23.6629	24.4328	24.7401	22.9286	24.3578	25.2366	25.4435	24.5601	24.6984	23.3467	25.1924	23.5943	24.0662	24.1975	22.8221	23.5799	23.6628	25.1876	26.0713	25.8029	26.6779	24.8831	24.2343	24.7481	24.8079	26.5836	26.252	23.4074	23.2794	23.9309	22.6664	23.493	25.3867	24.0758
	P00387	P00387	NADH-cytochrome b5 reductase 3;NADH-cytochrome b5 reductase 3 membrane-bound form;NADH-cytochrome b5 reductase 3 soluble form	1	CYB5R3	sp|P00387|NB5R3_HUMAN NADH-cytochrome b5 reductase 3 OS=Homo sapiens OX=9606 GN=CYB5R3 PE=1 SV=3	25.458	25.7599	25.4974	25.5884	25.0698	24.8116	23.823	25.809	24.9055	24.4037	22.8485	24.3317	25.487	26.2961	25.2951	25.2797	25.6916	25.149	25.0212	23.264	26.3463	25.2402	24.1936	24.5536	24.1825	26.0367	25.4795	24.7074	24.6906	24.1353	24.2985	24.4876	24.0181	25.292	26.0992	23.9362	25.3655	25.3383	24.8669	25.1267	24.5624	24.017	25.0359
	O43684	O43684	Mitotic checkpoint protein BUB3	1	BUB3	sp|O43684|BUB3_HUMAN Mitotic checkpoint protein BUB3 OS=Homo sapiens OX=9606 GN=BUB3 PE=1 SV=1	25.458	25.364	25.4613	25.071	25.3956	24.7321	25.1414	25.5248	24.9437	25.0219	24.9376	25.0719	25.0639	25.2446	25.2294	24.6205	25.3781	25.0487	25.2198	25.245	25.3508	25.3411	25.3295	25.474	25.0115	24.5582	25.6951	24.7571	24.8243	24.6465	25.691	25.1661	25.3409	25.1259	24.9209	25.2123	25.2431	25.6467	25.1034	25.0239	24.5315	25.388	24.8152
	O43707	O43707	Alpha-actinin-4	1	ACTN4	sp|O43707|ACTN4_HUMAN Alpha-actinin-4 OS=Homo sapiens OX=9606 GN=ACTN4 PE=1 SV=2	25.4565	25.5191	25.7117	25.7757	25.5953	25.9214	25.9758	24.9945	26.0281	25.4672	25.6472	25.1257	24.7454	25.0312	24.9161	25.4069	24.905	24.8059	25.1997	25.1033	24.9983	25.0479	24.7399	24.7048	25.3815	26.5069	24.1527	25.1996	24.7954	25.4899	25.4042	25.4483	25.4624	24.9536	24.4681	24.1847	25.5703	23.276	25.9617	25.4073	25.6411	26.2157	25.2358
	Q8WUM4	Q8WUM4	Programmed cell death 6-interacting protein	1	PDCD6IP	sp|Q8WUM4|PDC6I_HUMAN Programmed cell death 6-interacting protein OS=Homo sapiens OX=9606 GN=PDCD6IP PE=1 SV=1	25.456	25.5466	25.7097	25.3929	25.2563	25.0482	25.1618	25.0737	25.2648	25.3197	25.351	25.0358	25.3262	25.3843	24.6802	24.8584	24.5934	24.5286	24.034	24.6012	24.4339	24.1065	24.2462	21.3083	24.6313	25.4306	25.11	24.4506	24.3169	24.3269	26.0326	25.4133	25.1616	24.9349	24.9338	25.3626	24.9975	25.1633	25.4363	25.2529	24.9217	24.9761	24.3669
	P22314	P22314	Ubiquitin-like modifier-activating enzyme 1	1	UBA1	sp|P22314|UBA1_HUMAN Ubiquitin-like modifier-activating enzyme 1 OS=Homo sapiens OX=9606 GN=UBA1 PE=1 SV=3	25.4549	25.1731	25.1304	25.3062	25.429	25.5274	25.6109	25.1107	25.7175	25.2563	25.6189	25.1345	25.0017	25.9311	24.944	24.89	25.1069	25.2198	25.1475	24.8953	25.455	25.6667	24.896	24.9654	24.6968	26.0506	24.345	25.3239	25.2997	25.655	25.1159	24.7556	24.8227	25.2766	25.3853	25.1522	25.5184	24.3052	25.7662	25.1769	25.1074	24.4754	24.9682
	P40926	P40926	Malate dehydrogenase, mitochondrial	1	MDH2	sp|P40926|MDHM_HUMAN Malate dehydrogenase, mitochondrial OS=Homo sapiens OX=9606 GN=MDH2 PE=1 SV=3	25.4522	25.6275	24.4136	25.0088	25.7319	24.8057	24.4214	24.9096	25.1382	24.8679	24.6786	25.4312	25.3741	26.9309	23.3613	25.6526	25.299	25.9882	24.8891	23.9643	25.7148	26.1651	24.4338	25.0611	24.6217	26.8114	25.4417	25.1433	25.8387	25.2292	25.2026	23.922	23.7321	26.4168	26.376	26.3475	22.645	22.2091	25.2402	25.0563	24.9694	25.4823	21.0418
	P23588	P23588	Eukaryotic translation initiation factor 4B	2	EIF4B	sp|P23588|IF4B_HUMAN Eukaryotic translation initiation factor 4B OS=Homo sapiens OX=9606 GN=EIF4B PE=1 SV=2	25.4425	26.2121	25.9601	26.3704	26.2651	26.298	24.9704	26.2118	25.2193	26.4494	26.2189	26.8445	26.3549	26.0479	25.7304	25.3625	26.3726	26.0504	25.6694	25.4889	24.0871	25.7549	25.518	25.95	26.8983	26.2713	28.0589	26.8138	27.1262	26.6421	27.0459	26.9875	26.8811	27.8465	27.8888	27.9528	25.4694	25.9386	25.5748	26.3016	26.8873	28.2723	25.6278
	Q9NP79	Q9NP79	Vacuolar protein sorting-associated protein VTA1 homolog	1	VTA1	sp|Q9NP79|VTA1_HUMAN Vacuolar protein sorting-associated protein VTA1 homolog OS=Homo sapiens OX=9606 GN=VTA1 PE=1 SV=1	25.4416	26.574	25.8709	22.9608	22.9792	23.7176	24.2749	24.5164	24.1929	23.447	23.9282	24.6611	24.2872	25.0317	25.2996	24.5446	23.9707	23.49	24.9651	23.8831	25.2155	24.5704	25.436	24.6787	23.0825	24.7803	25.0055	24.0139	22.3729	23.6258	23.9912	23.5842	23.075	23.885	23.639	24.066	25.1768	24.3855	23.5803	23.197	24.5388	24.3453	24.5145
	Q99832	Q99832	T-complex protein 1 subunit eta	1	CCT7	sp|Q99832|TCPH_HUMAN T-complex protein 1 subunit eta OS=Homo sapiens OX=9606 GN=CCT7 PE=1 SV=2	25.4404	25.301	25.2661	25.9412	25.7128	25.7697	25.8194	25.076	26.0147	25.2712	25.6887	25.2989	24.8813	25.3974	24.8977	25.2072	25.2048	25.1914	25.333	25.2834	25.4747	25.3601	24.9096	24.8863	24.7851	25.4266	24.1965	25.7604	25.6286	26.0511	25.4046	25.6375	25.3808	25.2664	25.4339	25.0568	26.004	24.9723	25.9933	25.6152	25.5638	25.0134	25.4329
	Q99848	Q99848	Probable rRNA-processing protein EBP2	1	EBNA1BP2	sp|Q99848|EBP2_HUMAN Probable rRNA-processing protein EBP2 OS=Homo sapiens OX=9606 GN=EBNA1BP2 PE=1 SV=2	25.429	24.0463	24.6512	23.4064	24.0453	23.8511	23.8491	24.0709	24.0888	24.0449	24.5546	25.3277	22.7406	24.7604	25.4546	24.806	24.2503	24.4252	25.5244	25.299	25.4206	26.1277	26.2246	25.3871	24.8131	24.7023	24.8659	24.8164	23.9317	24.3098	24.2087	25.0858	24.4235	23.6786	23.5005	22.8866	23.1746	24.2043	24.2611	22.7407	23.029	22.163	23.8861
	Q01085	Q01085	Nucleolysin TIAR	1	TIAL1	sp|Q01085|TIAR_HUMAN Nucleolysin TIAR OS=Homo sapiens OX=9606 GN=TIAL1 PE=1 SV=1	25.4289	25.4461	25.3878	25.0895	25.3615	24.9852	25.2392	26.5199	25.4845	25.2957	25.0192	25.2497	26.1681	25.6337	25.329	25.6294	26.1636	26.3273	25.4564	25.7493	25.9653	25.6574	25.6759	25.2455	25.5339	24.7855	25.6295	25.6518	26.2488	25.7352	25.4295	25.3122	25.1087	25.0841	25.1839	25.4862	24.9916	25.9484	25.3463	24.9989	24.734	24.5542	25.6527
	P56192	P56192	Methionine--tRNA ligase, cytoplasmic	1	MARS	sp|P56192|SYMC_HUMAN Methionine--tRNA ligase, cytoplasmic OS=Homo sapiens OX=9606 GN=MARS PE=1 SV=2	25.4273	25.3785	25.2942	26.0067	25.6208	25.9395	25.7976	25.1966	25.9847	25.6324	25.4333	25.456	24.9713	24.4682	24.4825	25.9756	24.997	25.3042	25.2938	25.0239	25.6082	25.0305	24.9147	24.8016	25.1387	25.0465	24.4568	25.4477	24.6832	26.0554	25.8234	25.384	25.1529	25.4053	25.2067	24.7269	25.933	24.0943	26.3026	25.5534	25.3968	26.3752	25.7448
	Q9H4M9	Q9H4M9	EH domain-containing protein 1	1	EHD1	sp|Q9H4M9|EHD1_HUMAN EH domain-containing protein 1 OS=Homo sapiens OX=9606 GN=EHD1 PE=1 SV=2	25.4257	25.5513	25.5126	27.1676	25.682	25.371	24.8717	25.5859	26.4541	25.252	25.4996	26.6954	25.1904	24.9079	25.5485	24.7292	25.3272	25.1948	25.6336	26.054	25.6922	25.0136	25.8318	25.8541	25.5445	24.1927	25.6245	25.3002	25.2739	25.4002	25.3363	25.574	25.3841	26.7069	25.6034	25.862	26.8345	25.3516	25.7805	25.512	25.4631	25.3868	25.8452
	P68400	P68400;Q8NEV1	Casein kinase II subunit alpha;Casein kinase II subunit alpha 3	2	CSNK2A1	sp|P68400|CSK21_HUMAN Casein kinase II subunit alpha OS=Homo sapiens OX=9606 GN=CSNK2A1 PE=1 SV=1;sp|Q8NEV1|CSK23_HUMAN Casein kinase II subunit alpha 3 OS=Homo sapiens OX=9606 GN=CSNK2A3 PE=1 SV=2	25.4253	25.1149	25.5228	26.0145	25.9311	25.7299	25.6231	25.4558	25.745	26.4888	26.6146	26.6865	25.2645	25.0631	24.8926	25.4013	25.3087	25.1909	25.2843	25.3476	25.2717	25.4581	25.1887	25.1517	25.4862	25.0887	25.3638	24.9568	25.27	25.2418	26.0569	25.7142	25.6645	26.0264	26.3358	26.0987	25.7197	24.7635	25.9966	25.2831	25.625	25.6874	25.3126
	Q99459	Q99459	Cell division cycle 5-like protein	1	CDC5L	sp|Q99459|CDC5L_HUMAN Cell division cycle 5-like protein OS=Homo sapiens OX=9606 GN=CDC5L PE=1 SV=2	25.4219	24.9441	24.901	24.9504	25.263	25.0032	24.7617	25.483	24.8937	25.1725	25.294	25.3623	25.2893	25.2879	25.8362	25.3991	25.2718	25.1118	26.1107	25.9825	26.1158	25.3746	25.7984	25.344	25.1066	25.1197	25.4269	25.3611	25.4921	25.4098	25.0564	25.4813	25.1704	26.804	27.1743	27.0753	24.9581	25.6927	25.2706	25.4675	25.4575	25.2127	25.3621
	E9PAV3	E9PAV3;Q13765	Nascent polypeptide-associated complex subunit alpha, muscle-specific form;Nascent polypeptide-associated complex subunit alpha	3	NACA	sp|E9PAV3|NACAM_HUMAN Nascent polypeptide-associated complex subunit alpha, muscle-specific form OS=Homo sapiens OX=9606 GN=NACA PE=1 SV=1;sp|Q13765|NACA_HUMAN Nascent polypeptide-associated complex subunit alpha OS=Homo sapiens OX=9606 GN=NACA PE=1 SV=1	25.4148	25.7088	25.3231	25.3963	25.9508	25.5334	25.2184	25.7714	25.0387	25.822	25.4953	25.566	25.5494	25.9099	25.0541	26.0844	25.5185	25.8089	25.3444	25.4998	25.9236	25.7346	25.4173	25.8104	25.148	26.7412	25.5234	25.4996	25.6056	25.3915	25.6121	25.1795	25.0446	25.5231	25.8872	26.0742	25.3961	25.3069	25.3172	25.2252	25.2753	25.3115	25.8303
	P02545	P02545	Prelamin-A/C;Lamin-A/C	1	LMNA	sp|P02545|LMNA_HUMAN Prelamin-A/C OS=Homo sapiens OX=9606 GN=LMNA PE=1 SV=1	25.4139	25.2724	25.1839	24.6911	24.9422	24.966	23.5955	24.4975	23.6812	25.681	25.0159	25.3511	24.8813	24.9606	25.0354	25.234	25.6054	25.3601	24.1701	24.3001	23.1524	24.7046	24.7312	23.9122	25.3813	29.1357	26.1045	23.5413	23.5692	22.4058	25.6759	25.2771	25.261	24.4164	24.7534	24.9566	24.4114	25.5309	24.7346	24.7881	24.7461	25.9063	23.8357
	P06493	P06493	Cyclin-dependent kinase 1	1	CDK1	sp|P06493|CDK1_HUMAN Cyclin-dependent kinase 1 OS=Homo sapiens OX=9606 GN=CDK1 PE=1 SV=3	25.4134	25.5197	25.6377	24.7646	24.9034	24.8047	25.6381	25.099	25.3974	25.1149	25.16	24.539	25.3548	25.4081	25.2676	25.1981	25.6727	25.7787	25.4251	25.3804	25.19	25.4617	25.5495	25.0287	24.9664	24.2139	24.7017	25.5132	25.4576	25.5942	25.2168	24.5174	24.8044	25.5733	25.1798	25.5114	25.8445	25.1017	25.6902	25.3741	24.9579	24.4073	25.4522
	P11388	P11388	DNA topoisomerase 2-alpha	1	TOP2A	sp|P11388|TOP2A_HUMAN DNA topoisomerase 2-alpha OS=Homo sapiens OX=9606 GN=TOP2A PE=1 SV=3	25.4089	23.0116	22.1869	23.9974	24.4087	23.7278	21.1321	19.4485	21.1529	23.257	22.4539	19.6158	23.3589	22.6923	26.5375	26.5936	23.6342	23.8767	23.9225	22.0333	22.4204	23.8405	24.9374	22.5194	20.1705	23.4706	22.7989	25.1532	23.8426	23.1112	23.6197	25.6635	22.3803	23.1687	22.8109	22.5424	20.3396	24.6223	23.4532	20.4212	22.7881	23.0727	25.708
	Q13595	Q13595	Transformer-2 protein homolog alpha	1	TRA2A	sp|Q13595|TRA2A_HUMAN Transformer-2 protein homolog alpha OS=Homo sapiens OX=9606 GN=TRA2A PE=1 SV=1	25.4086	24.8679	25.1429	25.7739	25.5741	26.0548	25.0799	25.377	25.1443	24.9969	25.6728	25.9949	25.6287	25.6608	26.2308	25.4684	25.8791	25.7725	25.1531	24.8741	25.426	25.0539	25.3931	25.0577	25.8126	25.8492	26.2239	26.1425	26.2664	26.1691	25.5856	26.2566	25.5413	27.8716	28.1444	28.1465	24.993	25.3815	24.9836	25.5075	25.6344	26.0837	25.9756
	Q14571	Q14571	Inositol 1,4,5-trisphosphate receptor type 2	1	ITPR2	sp|Q14571|ITPR2_HUMAN Inositol 1,4,5-trisphosphate receptor type 2 OS=Homo sapiens OX=9606 GN=ITPR2 PE=1 SV=2	25.4086	25.326	25.5581	25.0453	25.0694	25.6496	26.1539	23.9433	25.9846	24.9173	25.5371	24.4303	23.8507	22.175	24.4442	25.2146	24.0741	24.2529	24.46	24.5173	24.6577	24.0309	23.7685	22.4639	24.8137	23.4589	20.7247	24.5275	23.8396	24.9751	24.9445	25.1944	24.6162	23.1312	22.6991	21.9593	25.6455	20.2412	25.751	25.0378	25.577	23.6233	24.5585
	Q9Y3F4	Q9Y3F4	Serine-threonine kinase receptor-associated protein	1	STRAP	sp|Q9Y3F4|STRAP_HUMAN Serine-threonine kinase receptor-associated protein OS=Homo sapiens OX=9606 GN=STRAP PE=1 SV=1	25.4052	25.4253	25.4885	25.3357	25.3756	24.9512	25.5747	25.8502	25.8827	24.9984	25.2241	25.2543	25.3653	25.6888	25.051	25.4747	25.8211	25.7387	25.107	25.1637	25.5561	25.8126	25.6752	25.81	25.0833	25.3349	25.833	26.5603	27.0081	26.8099	25.395	25.096	24.9141	25.4011	25.7141	25.5843	25.4938	25.2139	25.7868	24.9995	25.2751	25.2193	25.4968
	P31947	P31947	14-3-3 protein sigma	1	SFN	sp|P31947|1433S_HUMAN 14-3-3 protein sigma OS=Homo sapiens OX=9606 GN=SFN PE=1 SV=1	25.4035	26.1628	25.9429	27.6756	27.282	27.6732	26.6752	26.2533	25.6862	26.5672	26.6764	27.5766	25.8545	26.4117	25.2553	25.3964	26.2446	25.471	25.6487	25.1994	26.3035	26.6614	25.4133	26.2611	27.1706	32.7279	27.5507	26.033	26.5736	25.6084	27.3892	27.2879	27.229	26.8815	27.9852	27.8298	26.0616	25.8259	26.4506	27.9136	27.7807	27.7349	25.6435
	P45973	P45973	Chromobox protein homolog 5	1	CBX5	sp|P45973|CBX5_HUMAN Chromobox protein homolog 5 OS=Homo sapiens OX=9606 GN=CBX5 PE=1 SV=1	25.3956	24.3864	24.1723	22.5488	24.5043	22.1563	22.7119	21.8606	23.2808	20.5575	21.2621	22.493	22.8325	23.8392	26.3919	24.7171	23.589	23.9628	24.6539	22.9896	24.8199	22.1032	24.5154	21.9132	19.262	20.9128	20.3464	23.936	23.1414	22.4362	23.2699	23.7189	21.6844	22.5115	19.3175	19.0074	20.9671	25.1262	22.14	22.5655	21.318	22.4457	25.3579
	Q8IWS0	Q8IWS0	PHD finger protein 6	2	PHF6	sp|Q8IWS0|PHF6_HUMAN PHD finger protein 6 OS=Homo sapiens OX=9606 GN=PHF6 PE=1 SV=1	25.3938	25.3439	25.3134	25.8394	26.0282	25.5263	24.9186	25.7603	25.1946	26.7629	26.8069	26.085	25.9036	25.4834	25.3414	24.8272	25.5416	25.5052	25.8255	25.8755	25.8555	26.3737	26.3583	26.2298	26.1505	26.244	26.5203	25.9078	25.9081	25.6634	26.6905	26.3355	26.4021	26.4373	25.7369	25.8525	25.0483	25.6874	24.8143	25.9985	26.123	25.4882	25.1783
	Q12874	Q12874	Splicing factor 3A subunit 3	1	SF3A3	sp|Q12874|SF3A3_HUMAN Splicing factor 3A subunit 3 OS=Homo sapiens OX=9606 GN=SF3A3 PE=1 SV=1	25.3922	24.251	25.0409	24.2572	24.8013	24.0666	24.3097	25.0859	24.7747	24.0307	23.868	23.5539	25.1345	25.7199	26.292	25.1007	25.1812	25.1233	24.7097	23.8974	24.3876	25.1413	25.6063	25.1192	24.2696	23.6223	24.1456	25.0795	24.5551	24.5082	24.7874	25.1833	24.4997	24.3419	24.4757	24.6212	22.4213	25.97	24.578	24.0583	23.9065	25.0089	25.2047
	Q9NVI7	Q9NVI7	ATPase family AAA domain-containing protein 3A	1	ATAD3A	sp|Q9NVI7|ATD3A_HUMAN ATPase family AAA domain-containing protein 3A OS=Homo sapiens OX=9606 GN=ATAD3A PE=1 SV=2	25.3902	25.2614	25.2957	25.4555	25.4209	25.1152	25.5172	25.5257	25.2911	24.8947	25.1864	25.0689	25.2194	25.6202	25.4479	25.3619	25.4453	25.5551	24.8995	25.1085	24.6784	25.4308	25.497	25.0559	24.7875	24.6558	24.4354	25.8006	25.8901	25.9944	25.2181	24.6561	25.2855	25.3524	25.5091	25.4493	25.5401	25.607	25.5969	25.471	25.1199	24.9061	25.5044
	P63167	P63167	Dynein light chain 1, cytoplasmic	1	DYNLL1	sp|P63167|DYL1_HUMAN Dynein light chain 1, cytoplasmic OS=Homo sapiens OX=9606 GN=DYNLL1 PE=1 SV=1	25.3863	25.0144	25.5767	26.174	25.8431	26.4007	26.0587	25.916	26.0396	26.1928	26.3081	24.9477	25.9722	25.2918	25.3121	26.1451	26.3183	26.5706	25.4261	26.0622	25.2813	25.6038	25.1853	24.3269	25.309	26.1273	24.6769	25.8191	25.7175	25.7014	25.9037	26.1553	25.9211	26.1409	25.9862	25.4457	25.5633	25.3399	26.5799	25.925	25.6898	25.0525	25.7962
	Q02241	Q02241	Kinesin-like protein KIF23	1	KIF23	sp|Q02241|KIF23_HUMAN Kinesin-like protein KIF23 OS=Homo sapiens OX=9606 GN=KIF23 PE=1 SV=3	25.3821	25.4916	25.6203	25.8544	25.8596	26.1598	25.5079	24.5491	25.4698	25.1211	25.4449	25.803	24.9082	24.66	24.9103	24.9172	24.9679	24.7394	25.1477	24.9038	24.9039	24.7216	24.8304	25.0836	25.4381	24.6658	24.1036	25.0346	24.4189	25.0395	25.135	25.596	25.6648	25.1936	25.3234	25.2898	25.8329	24.4959	25.5626	25.3683	25.5139	25.6572	24.9989
	Q96DU7	Q96DU7	Inositol-trisphosphate 3-kinase C	1	ITPKC	sp|Q96DU7|IP3KC_HUMAN Inositol-trisphosphate 3-kinase C OS=Homo sapiens OX=9606 GN=ITPKC PE=1 SV=1	25.3817	25.307	25.3767	25.2578	25.808	25.3765	25.3895	25.4462	25.4475	26.3822	25.5706	25.3112	25.4675	25.4028	25.4583	25.4803	25.4011	25.3525	25.3167	25.4331	25.3621	25.3635	25.4533	25.3802	25.9427	25.3444	25.5177	25.3613	25.3056	25.3621	26.096	25.5239	25.8788	24.3397	25.629	25.2725	25.46	25.3332	25.6004	25.2642	25.2924	25.4631	25.4709
	Q14938	Q14938	Nuclear factor 1 X-type	1	NFIX	sp|Q14938|NFIX_HUMAN Nuclear factor 1 X-type OS=Homo sapiens OX=9606 GN=NFIX PE=1 SV=2	25.3781	25.4403	25.4383	20.8577	24.2625	23.8265	24.1965	21.7089	24.1353	24.1706	24.2742	23.453	26.3852	25.8817	25.2864	25.7309	26.0843	26.2857	24.091	24.8834	24.3911	24.3393	24.3285	24.5094	25.0224	24.227	25.7195	24.3928	25.2212	25.0528	25.6564	24.9835	24.7418	24.51	24.8785	24.8749	24.7531	25.8398	24.7257	24.5286	24.0016	24.1941	24.7234
	Q96DI7	Q96DI7	U5 small nuclear ribonucleoprotein 40 kDa protein	1	SNRNP40	sp|Q96DI7|SNR40_HUMAN U5 small nuclear ribonucleoprotein 40 kDa protein OS=Homo sapiens OX=9606 GN=SNRNP40 PE=1 SV=1	25.377	25.0272	24.6577	25.4552	25.3556	24.9487	25.289	25.4066	24.7805	24.9729	24.9384	25.0406	25.6599	25.294	26.0293	25.7572	25.1835	25.3464	28.5763	28.9076	28.6727	24.9756	25.42	24.8382	24.9284	24.5858	25.3143	25.194	25.6018	25.3092	24.9703	25.2548	25.2585	28.1966	28.9922	28.8625	24.912	25.6912	25.5373	26.15	25.8871	26.0035	26.0558
	O15020	O15020	Spectrin beta chain, non-erythrocytic 2	1	SPTBN2	sp|O15020|SPTN2_HUMAN Spectrin beta chain, non-erythrocytic 2 OS=Homo sapiens OX=9606 GN=SPTBN2 PE=1 SV=3	25.3765	25.0781	25.6355	26.231	25.6584	25.909	25.9949	24.6411	25.8495	25.3131	25.6766	25.3914	23.4151	23.5394	24.9819	25.0932	24.7423	24.7232	24.6651	24.928	24.592	24.7108	24.5027	23.1475	25.2183	25.3989	22.1856	25.2276	24.4395	25.3111	25.5072	25.6471	25.7391	24.4625	24.1121	23.6706	25.8045	22.4575	26.0482	25.3567	25.4279	26.035	25.2778
	P15311	P15311	Ezrin	1	EZR	sp|P15311|EZRI_HUMAN Ezrin OS=Homo sapiens OX=9606 GN=EZR PE=1 SV=4	25.3763	25.3111	25.0348	25.6602	26.0322	25.9938	25.3766	25.0333	25.7962	25.0758	26.2642	25.5339	24.8903	25.8226	24.8963	25.0293	25.2472	25.0202	25.1131	24.9117	25.3891	25.6441	25.0822	25.0781	25.743	29.3876	25.1963	25.2289	25.1991	25.3579	25.2899	25.864	25.7177	25.2268	26.4071	26.0161	25.3374	24.1508	25.633	24.9566	25.8465	26.5996	24.7742
	P26358	P26358	DNA (cytosine-5)-methyltransferase 1	1	DNMT1	sp|P26358|DNMT1_HUMAN DNA (cytosine-5)-methyltransferase 1 OS=Homo sapiens OX=9606 GN=DNMT1 PE=1 SV=2	25.3711	25.3783	24.9747	23.7025	24.3489	22.4826	25.4699	25.7335	24.7895	24.0823	23.7635	23.7176	25.7741	24.5435	25.1784	25.4819	24.8227	25.0158	24.7502	24.4823	25.3888	24.9947	24.9137	24.7577	23.6079	22.6143	24.9237	25.0809	25.1647	24.9623	24.7752	23.5187	23.9584	23.6778	23.9139	24.575	24.3405	24.9336	25.6526	23.5925	24.0767	24.5933	25.5195
	Q96JB3	Q96JB3	Hypermethylated in cancer 2 protein	1	HIC2	sp|Q96JB3|HIC2_HUMAN Hypermethylated in cancer 2 protein OS=Homo sapiens OX=9606 GN=HIC2 PE=1 SV=2	25.3683	25.7642	25.7162	24.863	25.2414	24.4686	22.1485	23.6778	21.5214	24.8433	24.1461	25.0322	26.4841	25.8856	25.6183	25.5732	26.632	26.3461	24.7945	24.5008	24.221	24.2875	24.2439	24.971	25.7554	25.3629	26.5932	25.1507	25.1386	24.9502	25.8452	25.5219	25.902	26.3002	25.3996	26.0075	24.9629	25.7757	23.5671	25.2948	25.362	24.3409	25.7048
	Q9NX58	Q9NX58	Cell growth-regulating nucleolar protein	1	LYAR	sp|Q9NX58|LYAR_HUMAN Cell growth-regulating nucleolar protein OS=Homo sapiens OX=9606 GN=LYAR PE=1 SV=2	25.3666	25.2972	25.2874	25.2409	25.5757	24.8955	24.3539	23.8167	24.1732	22.6757	24.9093	26.6084	24.8451	24.9178	24.7913	24.6143	21.974	24.1628	25.7566	25.3088	24.1859	26.1597	26.0402	26.3482	26.7115	25.9876	26.8169	24.6272	22.9765	24.442	25.3094	26.3246	26.7327	22.9884	24.8574	22.2375	24.6431	25.0181	24.3282	23.9201	25.0059	24.6797	23.1666
	Q53GQ0	Q53GQ0	Very-long-chain 3-oxoacyl-CoA reductase	1	HSD17B12	sp|Q53GQ0|DHB12_HUMAN Very-long-chain 3-oxoacyl-CoA reductase OS=Homo sapiens OX=9606 GN=HSD17B12 PE=1 SV=2	25.3641	24.9754	25.0635	25.0185	25.7239	25.1349	25.1782	25.1341	25.1237	25.3166	24.2895	24.7882	25.1945	25.593	25.2122	25.3028	25.6546	25.4315	24.7499	25.1349	25.1372	25.9262	25.646	25.2413	24.1495	24.9609	24.0487	25.3733	25.3343	25.2969	24.3952	24.7427	24.9546	24.6769	24.7648	25.0448	25.2462	25.2703	24.975	24.9632	25.3046	23.9664	25.1244
	P52292	P52292	Importin subunit alpha-1	1	KPNA2	sp|P52292|IMA1_HUMAN Importin subunit alpha-1 OS=Homo sapiens OX=9606 GN=KPNA2 PE=1 SV=1	25.3608	24.951	25.1145	25.3786	24.9543	24.9379	25.3214	25.6588	25.3908	24.8859	24.8806	24.7003	26.0875	25.8419	25.77	25.256	25.1967	25.3926	25.2574	24.9983	25.4173	25.4965	25.7131	25.4395	24.1914	23.8515	25.1739	25.6079	25.7376	25.8033	24.9854	24.7991	24.6107	25.0564	24.9818	25.0171	24.8146	25.7172	25.1037	24.8895	24.7943	24.1534	25.5087
	Q9ULV4	Q9ULV4	Coronin-1C	2	CORO1C	sp|Q9ULV4|COR1C_HUMAN Coronin-1C OS=Homo sapiens OX=9606 GN=CORO1C PE=1 SV=1	25.3603	25.5042	25.8029	26.1947	25.9139	25.974	25.3873	24.5206	25.5529	25.7604	25.8763	25.6558	24.7886	24.7051	24.7758	24.9467	24.8937	25.0406	25.1824	25.0272	25.211	24.9399	25.0242	24.8263	26.3395	25.7053	24.4723	24.9152	24.6359	25.1206	25.6966	25.8193	25.8352	24.8486	25.0006	24.5999	25.8124	23.6362	25.8821	25.9723	26.0437	24.9927	25.1576
	P05023	P05023	Sodium/potassium-transporting ATPase subunit alpha-1	2	ATP1A1	sp|P05023|AT1A1_HUMAN Sodium/potassium-transporting ATPase subunit alpha-1 OS=Homo sapiens OX=9606 GN=ATP1A1 PE=1 SV=1	25.355	25.3106	25.3756	25.0383	24.9608	24.7644	25.5467	24.9342	25.1746	24.999	24.7564	24.8725	25.0785	25.3963	24.9265	24.7509	25.2804	25.1899	25.0796	25.0186	25.138	25.548	25.2229	25.453	24.8059	24.5624	25.2513	25.5438	25.3026	25.2975	24.9704	24.7772	25.0168	24.9479	25.2965	25.1203	25.5369	24.7494	25.3736	24.8962	25.2471	24.902	25.2512
	Q86V48	Q86V48	Leucine zipper protein 1	1	LUZP1	sp|Q86V48|LUZP1_HUMAN Leucine zipper protein 1 OS=Homo sapiens OX=9606 GN=LUZP1 PE=1 SV=2	25.3497	25.5705	25.6726	25.2932	25.5209	25.6115	25.5651	24.6846	25.2141	25.2822	25.2057	24.9972	23.7031	22.604	24.354	22.93	23.9352	23.8574	24.4792	24.5921	24.2008	23.976	24.1575	24.0193	25.4252	23.8494	24.1181	24.9297	23.9068	24.8682	25.4713	25.2278	25.7474	24.3935	22.824	22.0708	25.6673	23.8176	25.5689	24.7594	25.3381	26.1095	25.1183
	O95714	O95714	E3 ubiquitin-protein ligase HERC2	2	HERC2	sp|O95714|HERC2_HUMAN E3 ubiquitin-protein ligase HERC2 OS=Homo sapiens OX=9606 GN=HERC2 PE=1 SV=2	25.3453	25.2073	25.4042	24.1161	24.7415	24.2889	24.3977	24.9666	24.8417	25.2042	24.9209	24.6478	25.3486	25.2885	25.0141	25.1287	25.4265	25.4347	23.5278	24.5059	22.6569	24.0266	24.3147	22.1165	24.6671	23.7058	24.8776	24.7084	25.011	24.8464	24.2737	24.4551	24.6279	24.4672	24.5653	25.0966	24.5284	25.428	25.1568	24.7131	24.5665	22.9437	22.8422
	P25205	P25205	DNA replication licensing factor MCM3	1	MCM3	sp|P25205|MCM3_HUMAN DNA replication licensing factor MCM3 OS=Homo sapiens OX=9606 GN=MCM3 PE=1 SV=3	25.3364	25.4003	25.326	25.2439	25.4106	24.7645	25.393	25.2753	25.2069	25.2396	25.0185	25.3247	25.1573	25.0252	25.0347	25.213	25.3538	25.3108	25.357	25.2192	25.6118	25.3204	25.1655	25.2487	24.8945	24.577	24.9418	25.4	25.3885	25.3676	24.9522	25.1042	25.2193	25.48	25.6131	25.6103	25.5544	25.5482	25.5584	25.3239	25.118	24.534	25.5188
	O95613	O95613	Pericentrin	1	PCNT	sp|O95613|PCNT_HUMAN Pericentrin OS=Homo sapiens OX=9606 GN=PCNT PE=1 SV=4	25.3326	25.0853	25.2797	26.6614	26.0559	26.5271	25.4357	23.1154	25.7906	25.6242	25.2053	26.8449	19.9679	22.9148	23.3765	24.6475	23.5891	23.2585	22.3143	23.5736	20.9106	23.2866	22.0778	21.7745	25.6931	21.7444	21.1081	23.0437	21.2344	22.9253	24.7845	25.6714	25.1319	21.4676	18.971	20.2081	25.8985	20.9493	25.6353	25.8975	26.1618	25.833	21.0247
	Q9UI30	Q9UI30	Multifunctional methyltransferase subunit TRM112-like protein	1	TRMT112	sp|Q9UI30|TR112_HUMAN Multifunctional methyltransferase subunit TRM112-like protein OS=Homo sapiens OX=9606 GN=TRMT112 PE=1 SV=1	25.3298	25.6864	24.9065	24.6214	24.7373	24.0523	23.9738	24.9734	24.5584	24.0742	24.6182	25.2246	24.8039	24.7173	24.151	24.613	25.0084	24.5176	25.2722	25.3867	24.9946	25.8035	25.8416	25.7832	24.7639	24.6341	25.1939	25.3873	25.3685	24.2384	25.0784	24.9931	25.1079	24.6506	25.2914	25.479	25.1694	25.2405	24.9462	24.9636	24.0449	25.6514	25.3045
	O14802	O14802	DNA-directed RNA polymerase III subunit RPC1	1	POLR3A	sp|O14802|RPC1_HUMAN DNA-directed RNA polymerase III subunit RPC1 OS=Homo sapiens OX=9606 GN=POLR3A PE=1 SV=2	25.3292	25.0109	25.4104	24.5568	25.1239	25.3534	25.3928	25.8698	25.6958	25.5525	25.3246	24.909	25.1671	25.2232	25.05	25.4213	25.5906	25.9124	25.1604	25.7501	25.5956	25.3374	25.1921	22.1253	24.5905	24.3131	24.9636	24.8795	25.0723	25.2053	24.9495	25.04	24.5759	24.8327	24.9786	24.9572	24.8061	25.5023	25.3207	25.4369	25.2973	23.4475	25.2963
	Q14697	Q14697	Neutral alpha-glucosidase AB	1	GANAB	sp|Q14697|GANAB_HUMAN Neutral alpha-glucosidase AB OS=Homo sapiens OX=9606 GN=GANAB PE=1 SV=3	25.3272	25.4419	24.9368	25.6524	25.7904	24.9385	25.5139	25.0309	25.5405	25.4493	25.7229	25.1977	25.0903	25.632	24.7925	25.2841	24.9027	25.1317	24.9915	24.911	25.3901	25.4252	24.5188	24.7242	24.3814	25.8681	24.7512	25.4098	25.2419	25.5243	25.1772	25.2763	25.015	25.8281	25.3145	25.1457	25.5346	23.8961	25.7445	25.2377	25.6414	25.5522	24.8604
	P46060	P46060	Ran GTPase-activating protein 1	1	RANGAP1	sp|P46060|RAGP1_HUMAN Ran GTPase-activating protein 1 OS=Homo sapiens OX=9606 GN=RANGAP1 PE=1 SV=1	25.3207	24.416	25.0273	25.4937	24.0846	25.0895	26.4531	25.041	26.6457	24.9121	24.737	25.3985	29.5257	29.5323	28.8789	25.1193	25.0404	25.0899	25.0237	25.3675	25.4509	25.6079	25.5594	25.4344	25.4485	25.1378	24.6389	25.5013	25.246	25.3328	24.3763	25.0751	24.6102	24.8463	25.2668	25.1859	25.0767	24.9481	25.5889	26.0668	24.8037	25.7103	26.1479
	Q8IY63	Q8IY63	Angiomotin-like protein 1	1	AMOTL1	sp|Q8IY63|AMOL1_HUMAN Angiomotin-like protein 1 OS=Homo sapiens OX=9606 GN=AMOTL1 PE=1 SV=1	25.3207	25.505	25.2666	25.6098	25.3381	25.8979	25.867	25.1493	25.1727	25.6762	25.4761	25.7526	25.2298	25.173	25.0429	25.2115	25.3303	25.3047	25.0356	25.0977	24.1951	25.153	25.215	25.0406	25.5249	25.4214	26.5691	25.2639	25.4834	26.0755	25.5651	25.3381	26.7586	23.787	26.4377	25.1951	25.1599	25.266	25.2809	24.5409	25.1895	25.323	25.0231
	P55036	P55036	26S proteasome non-ATPase regulatory subunit 4	1	PSMD4	sp|P55036|PSMD4_HUMAN 26S proteasome non-ATPase regulatory subunit 4 OS=Homo sapiens OX=9606 GN=PSMD4 PE=1 SV=1	25.3158	25.2651	25.2244	25.3762	25.519	25.1602	25.0761	24.8918	25.0681	23.8965	25.081	25.1006	24.7642	25.2356	24.7939	23.71	25.0138	24.9294	25.2608	25.1317	24.9261	24.8429	25.0333	24.572	23.9915	25.0949	24.6624	24.9807	24.8023	24.9406	24.9518	25.2466	25.4898	24.3346	25.1101	24.9393	25.5176	24.8399	25.6617	25.4233	24.9642	25.6267	24.8337
	Q53ET0	Q53ET0	CREB-regulated transcription coactivator 2	1	CRTC2	sp|Q53ET0|CRTC2_HUMAN CREB-regulated transcription coactivator 2 OS=Homo sapiens OX=9606 GN=CRTC2 PE=1 SV=2	25.3155	23.0803	21.1654	23.9849	24.2104	24.3435	22.2369	22.696	21.2583	23.1711	26.0357	26.8859	22.1393	23.0137	22.2134	23.2096	23.1676	23.0116	22.7424	22.642	22.8221	22.6545	22.8347	23.1013	26.8109	26.7561	25.1183	22.9069	23.2073	22.7159	26.14	23.9919	26.2042	24.7326	24.1463	24.5074	22.7935	23.2166	22.8844	23.9255	24.5129	24.6037	23.2106
	Q12860	Q12860	Contactin-1	1	CNTN1	sp|Q12860|CNTN1_HUMAN Contactin-1 OS=Homo sapiens OX=9606 GN=CNTN1 PE=1 SV=1	25.3151	24.749	25.4651	24.8414	24.9695	24.9584	26.1522	26.3544	26.1529	25.9834	24.5058	23.2075	25.0158	24.8811	24.6869	26.6812	25.2151	26.2108	24.906	25.1873	24.5293	23.331	24.8216	23.9141	25.0152	24.8565	23.4886	25.3765	24.9863	26.0717	24.3951	25.1592	24.6716	23.6055	24.1047	21.8798	25.0358	22.5931	25.3821	24.5634	25.2968	24.6842	25.0692
	O14744	O14744	Protein arginine N-methyltransferase 5;Protein arginine N-methyltransferase 5, N-terminally processed	1	PRMT5	sp|O14744|ANM5_HUMAN Protein arginine N-methyltransferase 5 OS=Homo sapiens OX=9606 GN=PRMT5 PE=1 SV=4	25.3077	25.0023	24.7778	24.6608	25.1447	25.2612	25.0574	24.6879	25.2864	24.4606	25.1425	24.7216	23.9682	24.7875	24.4661	24.2402	24.7154	24.6173	24.6809	24.5209	25.1143	24.8467	24.6989	23.8363	24.9804	23.7049	24.1478	26.0154	26.2465	26.3746	24.1389	24.8977	25.0607	24.5047	24.3168	24.0755	25.4427	24.5522	25.3429	24.6889	24.7471	22.8117	25.0624
	O15226	O15226	NF-kappa-B-repressing factor	1	NKRF	sp|O15226|NKRF_HUMAN NF-kappa-B-repressing factor OS=Homo sapiens OX=9606 GN=NKRF PE=1 SV=2	25.3015	25.2568	25.3094	25.3145	25.4649	25.0799	25.6746	26.4245	25.6529	26.1807	25.8153	25.7239	25.5948	25.3206	25.3732	25.2773	25.7896	25.5142	25.3661	25.4756	25.2872	25.503	25.5912	25.7344	25.8066	25.4542	26.4057	26.0662	26.5277	26.2197	26.5262	26.185	26.2556	25.8676	25.7032	26.0309	24.9168	25.5257	24.9881	25.6327	25.7253	26.1407	25.0684
	Q15758	Q15758	Neutral amino acid transporter B(0)	1	SLC1A5	sp|Q15758|AAAT_HUMAN Neutral amino acid transporter B(0) OS=Homo sapiens OX=9606 GN=SLC1A5 PE=1 SV=2	25.2972	25.1575	25.3792	25.3433	24.5413	24.7748	25.4817	24.9664	24.9748	23.0859	25.0953	24.222	24.9089	25.4056	25.0876	25.834	25.2534	25.463	24.3886	25.2156	24.3515	25.8006	25.226	24.8425	24.3283	24.6914	24.1118	25.5217	24.7803	25.1634	23.9112	25.2815	24.8477	23.2935	24.0883	23.2332	25.1333	24.2375	25.4127	25.0765	25.6704	26.1039	24.613
	P67870	P67870	Casein kinase II subunit beta	1	CSNK2B	sp|P67870|CSK2B_HUMAN Casein kinase II subunit beta OS=Homo sapiens OX=9606 GN=CSNK2B PE=1 SV=1	25.2955	25.4507	25.7313	25.2527	25.9365	25.4581	25.2396	25.2584	25.3079	26.4912	26.3513	26.6954	25.3577	25.2316	24.7945	25.6704	25.3697	25.803	25.3714	25.5534	25.3221	25.3748	25.299	25.1623	25.7228	24.9793	25.1709	24.758	25.4145	24.7449	24.9545	25.0263	25.1444	25.7279	26.3617	26.129	26.136	24.6603	25.8426	25.4076	25.2784	25.9374	25.7064
	Q9BY77	Q9BY77	Polymerase delta-interacting protein 3	1	POLDIP3	sp|Q9BY77|PDIP3_HUMAN Polymerase delta-interacting protein 3 OS=Homo sapiens OX=9606 GN=POLDIP3 PE=1 SV=2	25.2945	25.0801	25.2716	24.4946	24.9579	24.7424	25.3958	25.5758	25.1833	24.7746	25.1026	25.4114	25.6382	25.529	26.2435	25.7679	25.8701	25.7351	25.2623	25.1297	25.1698	25.0318	25.3843	25.4118	24.7452	24.4308	25.5889	25.6809	25.6943	25.4297	25.0443	24.9958	25.1272	26.4413	27.1201	27.1577	25.0721	25.7295	25.2462	25.4722	25.3466	25.9348	28.2488
	Q14152	Q14152	Eukaryotic translation initiation factor 3 subunit A	1	EIF3A	sp|Q14152|EIF3A_HUMAN Eukaryotic translation initiation factor 3 subunit A OS=Homo sapiens OX=9606 GN=EIF3A PE=1 SV=1	25.2943	25.3555	25.2477	25.9696	25.8905	25.5852	25.6428	25.393	25.6184	25.4415	25.4843	25.3155	24.64	25.0656	24.9145	27.6562	27.6956	27.8237	24.9523	24.9859	25.3691	25.105	24.4855	23.602	25.101	25.615	25.79	27.5616	28.4679	28.0685	26.0795	25.3103	25.3719	26.7294	25.9279	25.3206	25.5367	24.3443	25.4903	25.829	25.8336	27.7458	25.0384
	Q8NEY8	Q8NEY8	Periphilin-1	1	PPHLN1	sp|Q8NEY8|PPHLN_HUMAN Periphilin-1 OS=Homo sapiens OX=9606 GN=PPHLN1 PE=1 SV=2	25.293	25.4439	25.4703	25.6601	25.8862	26.1052	25.1071	25.7743	25.1933	26.0607	26.4487	26.8064	24.9078	24.5101	24.6857	25.2172	25.751	25.7727	25.0713	25.1527	24.8962	24.485	25.1233	24.8707	26.216	25.8019	26.6946	25.0431	25.0859	25.0709	26.3666	25.8965	26.2667	27.2557	27.2829	27.7332	25.2207	26.5876	24.6455	26.4762	26.302	26.2267	24.5302
	O95786	O95786	Probable ATP-dependent RNA helicase DDX58	1	DDX58	sp|O95786|DDX58_HUMAN Probable ATP-dependent RNA helicase DDX58 OS=Homo sapiens OX=9606 GN=DDX58 PE=1 SV=2	25.289	25.2571	25.095	25.2489	25.3382	25.0658	25.2664	25.3076	25.3292	25.3395	25.1281	25.0767	25.2253	25.3366	25.2081	25.2979	25.287	25.2883	25.1771	25.0842	25.2115	25.2426	25.168	25.0278	25.1711	25.1383	24.7612	25.3861	25.4231	25.497	28.1985	25.4696	25.3394	25.6412	26.4972	25.6446	25.3028	25.047	25.4534	25.1755	25.2892	25.1002	25.4743
	Q8IYB3	Q8IYB3	Serine/arginine repetitive matrix protein 1	1	SRRM1	sp|Q8IYB3|SRRM1_HUMAN Serine/arginine repetitive matrix protein 1 OS=Homo sapiens OX=9606 GN=SRRM1 PE=1 SV=2	25.2844	25.1794	24.8295	25.0398	25.6768	24.7209	24.0276	24.6211	24.2061	25.439	25.5288	26.0166	25.7879	25.285	25.0431	24.9122	25.3035	25.4718	25.4573	25.2499	24.8286	25.3309	25.2466	25.6256	26.2832	25.6363	26.3554	24.3608	24.763	24.3821	26.1317	26.0011	25.7597	26.5404	26.526	26.5238	24.3582	24.8681	24.2302	25.0487	25.468	26.3186	24.7559
	Q14191	Q14191	Werner syndrome ATP-dependent helicase	1	WRN	sp|Q14191|WRN_HUMAN Werner syndrome ATP-dependent helicase OS=Homo sapiens OX=9606 GN=WRN PE=1 SV=2	25.2824	25.3445	25.1587	24.6768	24.9629	24.7385	24.7005	25.6901	25.1536	25.3411	25.0611	25.2332	25.3163	25.0471	24.3111	25.5136	25.5367	25.598	24.7712	24.8962	24.9162	24.6098	24.4006	24.4142	25.464	24.8259	25.9017	23.9925	24.8735	24.5413	25.0696	25.2501	24.8524	24.4603	24.7534	24.7261	25.0212	25.8459	25.1974	24.8726	24.7499	24.8864	24.5326
	Q9HB71	Q9HB71	Calcyclin-binding protein	1	CACYBP	sp|Q9HB71|CYBP_HUMAN Calcyclin-binding protein OS=Homo sapiens OX=9606 GN=CACYBP PE=1 SV=2	25.2793	25.1956	25.1305	24.7795	25.189	24.8913	24.9119	25.3369	24.7867	24.8582	25.1562	24.3806	24.8255	25.6349	24.8395	24.7815	25.0205	25.4502	25.1497	24.7501	25.4967	25.6245	25.1661	25.0661	24.126	25.2536	25.1437	25.1617	25.1916	25.1386	24.8151	24.58	24.4052	25.2944	25.1796	25.1315	25.2257	24.9391	25.282	24.6556	24.9283	24.6339	25.0495
	P49750	P49750	YLP motif-containing protein 1	1	YLPM1	sp|P49750|YLPM1_HUMAN YLP motif-containing protein 1 OS=Homo sapiens OX=9606 GN=YLPM1 PE=1 SV=4	25.2788	25.1976	25.1127	24.51	24.6909	24.3307	24.667	25.754	24.9365	24.1605	25.0781	25.7018	25.3141	25.0416	25.2623	25.5163	25.5903	25.6978	24.8646	24.5746	24.724	23.9717	24.8088	24.3254	24.9584	24.9316	25.8906	26.2017	26.3408	25.965	24.8239	24.8654	24.7823	25.357	25.9228	26.1568	24.5936	25.4881	24.8843	24.4018	24.3257	25.0345	25.1132
	Q9HCD5	Q9HCD5	Nuclear receptor coactivator 5	1	NCOA5	sp|Q9HCD5|NCOA5_HUMAN Nuclear receptor coactivator 5 OS=Homo sapiens OX=9606 GN=NCOA5 PE=1 SV=2	25.2755	24.7033	24.6421	23.1885	23.8421	23.1756	24.0202	24.6106	24.161	24.0136	24.0261	23.7428	25.8194	25.3327	26.0757	24.8832	24.9097	25.1801	24.6178	23.5397	24.3361	24.1855	24.8804	23.55	22.9646	22.7733	24.7758	25.7475	25.8772	25.8336	23.6893	24.8121	23.7655	24.6464	25.6496	25.3756	24.7784	25.39	23.5467	23.5272	23.1322	24.0581	25.4356
	P41091	P41091;Q2VIR3	Eukaryotic translation initiation factor 2 subunit 3;Putative eukaryotic translation initiation factor 2 subunit 3-like protein	2	EIF2S3	sp|P41091|IF2G_HUMAN Eukaryotic translation initiation factor 2 subunit 3 OS=Homo sapiens OX=9606 GN=EIF2S3 PE=1 SV=3;sp|Q2VIR3|IF2GL_HUMAN Eukaryotic translation initiation factor 2 subunit 3B OS=Homo sapiens OX=9606 GN=EIF2S3B PE=2 SV=2	25.2664	25.3226	25.4679	25.1494	25.2876	25.4133	25.4321	25.8073	25.4235	25.1644	25.19	25.1725	25.4808	25.7087	25.2214	25.1642	25.5804	25.5951	25.3703	25.417	25.4915	25.7203	25.7617	25.6978	25.2245	25.8096	25.8109	25.5067	25.5656	25.1635	25.8045	25.5426	25.4178	25.3895	25.6676	25.9236	25.4879	25.3269	25.6224	25.4585	25.4347	25.1686	25.3509
	Q9H3K6	Q9H3K6	BolA-like protein 2	1	BOLA2	sp|Q9H3K6|BOLA2_HUMAN BolA-like protein 2 OS=Homo sapiens OX=9606 GN=BOLA2 PE=1 SV=1	25.2597	25.1692	25.2387	24.1503	23.5497	23.7081	24.9128	25.1294	24.7615	23.7075	24.5148	24.3809	24.5911	25.2487	24.8479	24.9324	25.051	24.8743	25.1465	24.7985	25.8004	25.2127	25.0888	25.2284	23.8821	23.7162	24.2989	27.7689	28.1428	27.7683	24.1863	23.3147	23.4696	24.6682	24.4175	24.5282	25.1233	24.6259	24.9597	23.5524	23.7762	24.1831	25.2864
	Q9UN37	Q9UN37	Vacuolar protein sorting-associated protein 4A	1	VPS4A	sp|Q9UN37|VPS4A_HUMAN Vacuolar protein sorting-associated protein 4A OS=Homo sapiens OX=9606 GN=VPS4A PE=1 SV=1	25.2594	25.7102	25.0695	25.5134	24.2175	24.4843	24.6412	24.9824	23.9479	25.1717	25.2785	25.8624	25.3453	25.6111	25.6677	25.0069	25.6203	25.681	25.2413	24.4639	24.5414	25.1098	24.9285	25.7419	24.4974	25.0426	25.7377	24.1854	24.6944	23.2757	24.8808	24.7435	24.9941	25.4421	25.2593	25.0716	25.335	25.7001	25.0681	25.5208	25.031	25.2019	25.062
	O75964	O75964	ATP synthase subunit g, mitochondrial	1	ATP5L	sp|O75964|ATP5L_HUMAN ATP synthase subunit g, mitochondrial OS=Homo sapiens OX=9606 GN=ATP5MG PE=1 SV=3	25.2587	24.8732	24.6048	24.4012	25.0785	24.6964	24.3101	23.5989	24.0205	22.3896	23.7192	25.762	23.5475	25.2121	24.5212	22.7361	24.7019	24.4335	24.5062	23.2555	25.2502	25.0785	24.6928	25.2282	23.8416	25.2493	23.5882	25.0331	24.1146	25.0054	22.5793	24.2436	23.9169	23.6652	24.3197	23.1623	24.4372	24.4646	24.0756	24.1218	25.0925	24.7777	25.0786
	P63162	P63162;P14678	Small nuclear ribonucleoprotein-associated protein N;Small nuclear ribonucleoprotein-associated proteins B and B	2	SNRPN	sp|P63162|RSMN_HUMAN Small nuclear ribonucleoprotein-associated protein N OS=Homo sapiens OX=9606 GN=SNRPN PE=1 SV=1;sp|P14678|RSMB_HUMAN Small nuclear ribonucleoprotein-associated proteins B and B OS=Homo sapiens OX=9606 GN=SNRPB PE=1 SV=2	25.258	24.6545	24.486	24.6431	25.168	24.9097	25.1431	26.0673	25.5742	25.5068	25.2876	24.2835	25.8007	25.0166	25.1493	25.7651	25.3184	25.5209	26.0351	26.974	26.432	25.3091	25.2148	24.664	24.7433	24.3548	23.6584	25.2598	25.9163	25.6623	25.5314	25.1978	24.9269	26.2032	25.8996	26.2633	24.7562	25.1189	25.6775	24.1972	24.8785	22.0264	25.8275
	Q8IUH3	Q8IUH3	RNA-binding protein 45	1	RBM45	sp|Q8IUH3|RBM45_HUMAN RNA-binding protein 45 OS=Homo sapiens OX=9606 GN=RBM45 PE=1 SV=1	25.2521	25.487	25.5643	25.2643	25.2484	25.4013	25.7363	26.8751	25.9614	25.529	25.8574	26.3678	26.5058	26.1132	25.4055	26.1952	26.44	26.455	25.7438	26.0637	25.9476	25.9956	26.1578	25.8754	25.4663	25.1454	26.0852	26.3997	26.7898	26.6836	25.9248	25.6248	25.3035	26.9982	27.1319	27.6584	25.5318	26.3488	25.5088	26.1352	25.8427	25.7632	25.9024
	P31948	P31948	Stress-induced-phosphoprotein 1	1	STIP1	sp|P31948|STIP1_HUMAN Stress-induced-phosphoprotein 1 OS=Homo sapiens OX=9606 GN=STIP1 PE=1 SV=1	25.2486	25.4058	25.1143	25.8328	25.9642	25.8381	25.443	25.0651	25.4761	25.5291	25.5122	24.9559	25.273	25.7428	24.6947	24.865	25.1615	25.4183	25.2339	25.3256	25.3784	25.563	24.6846	24.4496	24.9273	25.9196	24.5669	25.5849	25.3536	25.8187	25.7994	25.0393	25.4044	25.6083	25.6619	25.4132	25.6414	23.8992	25.8868	25.8716	25.8567	26.1422	25.4744
	Q92820	Q92820	Gamma-glutamyl hydrolase	1	GGH	sp|Q92820|GGH_HUMAN Gamma-glutamyl hydrolase OS=Homo sapiens OX=9606 GN=GGH PE=1 SV=2	25.2479	25.0794	24.812	23.1642	23.471	23.0181	25.2943	26.1203	25.3363	22.1783	24.0868	24.4081	26.4444	26.7961	26.5826	24.9939	26.2527	26.4637	25.4349	25.0412	25.4948	25.615	26.0692	25.9771	24.7731	23.3613	25.2194	24.8437	25.0038	25.187	24.0912	23.1964	23.6785	23.0308	23.7694	25.3464	24.8187	25.9575	25.1537	23.5993	23.4129	25.0821	25.6367
	Q9BQ75	Q9BQ75	Protein CMSS1	1	CMSS1	sp|Q9BQ75|CMS1_HUMAN Protein CMSS1 OS=Homo sapiens OX=9606 GN=CMSS1 PE=1 SV=2	25.241	25.4274	25.554	23.8518	24.6484	24.3423	24.9836	25.8168	23.9724	26.0627	23.3558	24.6264	25.7518	25.7345	25.2525	24.4545	25.0634	24.4092	25.9788	25.981	22.681	26.4138	26.517	24.8885	24.8558	23.5499	26.8855	25.0403	26.2888	25.3674	26.3816	25.4558	25.6367	25.127	25.5214	24.8549	24.2805	25.2362	24.6434	24.41	24.7702	25.8286	23.9055
	O14818	O14818	Proteasome subunit alpha type-7	1	PSMA7	sp|O14818|PSA7_HUMAN Proteasome subunit alpha type-7 OS=Homo sapiens OX=9606 GN=PSMA7 PE=1 SV=1	25.2238	25.2741	25.1597	25.4199	24.8868	24.9749	25.4914	24.8241	25.3365	24.572	24.1705	24.8775	24.2974	24.959	24.5549	24.5551	24.18	24.3789	25.1556	24.6367	25.2566	24.7176	24.4064	24.4501	24.5048	25.2583	23.8922	25.2569	24.6466	25.448	24.4098	24.3817	24.5026	24.2315	24.47	24.0206	26.0523	24.1077	25.6697	25.2242	25.0744	24.8756	25.192
	Q92466	Q92466	DNA damage-binding protein 2	1	DDB2	sp|Q92466|DDB2_HUMAN DNA damage-binding protein 2 OS=Homo sapiens OX=9606 GN=DDB2 PE=1 SV=1	25.2238	25.5852	25.4532	24.3447	24.6658	24.3895	25.0805	25.7944	25.0916	24.9261	25.1169	25.2715	25.7728	25.612	25.1905	25.3483	25.9366	25.734	24.6997	25.1431	24.8556	24.8569	24.5598	25.2625	25.0075	24.9588	25.9059	24.6647	25.0547	24.657	25.7907	25.081	25.2958	25.1898	25.4341	25.8461	25.0425	26.0462	25.0761	24.7979	25.0695	25.0935	24.6223
	P11586	P11586	C-1-tetrahydrofolate synthase, cytoplasmic;Methylenetetrahydrofolate dehydrogenase;Methenyltetrahydrofolate cyclohydrolase;Formyltetrahydrofolate synthetase;C-1-tetrahydrofolate synthase, cytoplasmic, N-terminally processed	1	MTHFD1	sp|P11586|C1TC_HUMAN C-1-tetrahydrofolate synthase, cytoplasmic OS=Homo sapiens OX=9606 GN=MTHFD1 PE=1 SV=3	25.2208	25.1503	25.0501	25.0618	25.5096	25.1633	25.5435	25.2019	25.926	24.7794	25.2967	25.0623	24.9218	25.4873	24.9666	25.2993	25.0349	25.2386	25	25.0323	25.2031	25.3345	25.0023	24.9589	24.6784	24.8095	24.6975	25.4474	25.3919	25.4911	24.4955	24.797	24.4568	24.9435	25.293	25.2052	25.4722	24.9664	25.9813	24.7869	24.7783	25.6562	25.6371
	O95793	O95793	Double-stranded RNA-binding protein Staufen homolog 1	1	STAU1	sp|O95793|STAU1_HUMAN Double-stranded RNA-binding protein Staufen homolog 1 OS=Homo sapiens OX=9606 GN=STAU1 PE=1 SV=2	25.2194	25.3286	25.1169	25.464	25.2425	25.4125	25.2757	25.7687	25.3223	25.4252	25.7551	25.4939	25.3923	25.1615	25.0815	25.5337	25.4151	25.5729	25.9168	25.8948	26.0725	26.1056	26.1886	26.0595	24.9931	24.9511	25.6949	25.6451	25.7976	25.7886	24.7176	25.4133	25.3018	25.1973	25.2669	25.4032	24.9913	25.5504	25.0304	24.9426	24.9417	25.0675	25.3445
	Q06787	Q06787	Fragile X mental retardation protein 1	1	FMR1	sp|Q06787|FMR1_HUMAN Synaptic functional regulator FMR1 OS=Homo sapiens OX=9606 GN=FMR1 PE=1 SV=1	25.2186	24.9506	25.261	25.5011	25.222	25.5299	25.9629	26.0154	25.8563	26.1395	25.7698	25.8753	26.1621	25.2865	25.3187	26.7902	26.6183	26.7411	25.2193	25.6028	25.6091	25.7632	25.5519	25.2386	25.2186	24.7522	25.4134	25.8681	26.3042	26.0117	25.8601	25.3031	25.2616	27.2568	27.4208	27.8104	25.3125	25.23	25.8829	25.7847	25.921	25.8023	25.6
	P27816	P27816	Microtubule-associated protein 4	1	MAP4	sp|P27816|MAP4_HUMAN Microtubule-associated protein 4 OS=Homo sapiens OX=9606 GN=MAP4 PE=1 SV=3	25.2132	25.6326	25.4362	25.2646	25.7615	25.5251	24.993	24.6834	25.0925	24.7763	25.001	25.1196	24.8354	25.2512	24.8738	24.3034	24.9709	24.8185	25.2938	24.8243	25.1991	25.16	24.7966	25.1048	24.5834	25.3217	25.3936	25.4617	24.9368	24.6955	25.4172	25.5196	25.442	24.7019	25.1741	24.5557	25.7483	25.166	25.1063	24.8518	25.4812	25.6515	24.9833
	Q9UH99	Q9UH99	SUN domain-containing protein 2	1	SUN2	sp|Q9UH99|SUN2_HUMAN SUN domain-containing protein 2 OS=Homo sapiens OX=9606 GN=SUN2 PE=1 SV=3	25.2104	25.5376	25.4759	24.4068	24.8341	24.8119	23.8602	24.5724	24.5474	25.1576	24.6623	24.9309	24.3772	24.7448	24.5304	24.6793	25.238	25.2656	24.1595	24.4301	24.8436	24.1158	24.3715	24.5707	24.9439	25.1752	25.543	23.9131	23.6156	23.7604	24.3781	24.5298	24.8838	24.1906	24.3285	24.2188	24.5888	25.3597	24.51	24.9483	24.2255	25.4598	23.9732
	P52565	P52565	Rho GDP-dissociation inhibitor 1	1	ARHGDIA	sp|P52565|GDIR1_HUMAN Rho GDP-dissociation inhibitor 1 OS=Homo sapiens OX=9606 GN=ARHGDIA PE=1 SV=3	25.2097	23.643	23.5775	23.0467	23.2242	23.1429	23.5665	22.9484	23.7248	22.536	23.3153	23.3172	22.5966	22.9694	23.0168	23.1589	23.5043	24.0357	23.3354	23.0933	23.4278	23.6396	23.1923	23.3189	21.1786	25.2647	22.3858	23.9881	23.5444	23.3917	22.7454	23.0242	22.7773	23.1002	24.2302	23.2783	23.7653	23.0686	23.8785	23.1358	24.1481	23.682	23.304
	P82673	P82673	28S ribosomal protein S35, mitochondrial	1	MRPS35	sp|P82673|RT35_HUMAN 28S ribosomal protein S35, mitochondrial OS=Homo sapiens OX=9606 GN=MRPS35 PE=1 SV=1	25.2069	24.5902	24.8967	24.9164	24.5313	25.0164	26.1511	26.9729	26.2191	24.3063	24.825	25.2642	25.0615	25.4164	25.2678	25.243	25.7137	25.548	25.2123	25.5681	24.0149	26.0425	25.8924	25.3611	25.5999	24.6142	25.1811	27.7214	27.8596	27.4579	23.918	24.7046	25.4244	27.0689	26.5545	26.7127	24.8679	25.4502	25.2917	25.7954	24.9447	25.547	25.7669
	Q15427	Q15427	Splicing factor 3B subunit 4	1	SF3B4	sp|Q15427|SF3B4_HUMAN Splicing factor 3B subunit 4 OS=Homo sapiens OX=9606 GN=SF3B4 PE=1 SV=1	25.2024	24.2119	24.1227	24.1521	24.3077	24.1413	24.3735	24.6478	24.7545	23.3027	23.6984	23.3697	24.9632	24.4349	25.3935	24.2784	24.3514	24.9715	24.367	24.4799	24.7032	24.4912	24.8394	23.9121	22.5647	24.1687	23.5941	25.248	24.941	25.468	22.294	23.7341	22.7584	23.9118	23.3369	23.652	24.1033	24.5411	24.6881	21.5582	21.9267	23.1739	25.3484
	A6NKB5	A6NKB5	Pecanex-like protein 2	1	PCNXL2	sp|A6NKB5|PCX2_HUMAN Pecanex-like protein 2 OS=Homo sapiens OX=9606 GN=PCNX2 PE=2 SV=3	25.202	25.5944	25.4709	25.0073	25.1553	24.9376	24.6794	25.1225	25.2669	24.8861	24.975	25.0179	25.4532	25.7634	25.4349	24.8959	25.0028	25.2012	25.6309	25.5058	26.0306	25.2793	25.3061	25.7848	24.7474	24.8512	24.9338	25.1632	25.0661	25.2813	24.8862	24.8522	24.921	24.988	25.0085	24.9909	25.3888	25.871	25.3184	24.8439	24.9373	24.9052	25.4709
	Q99873	Q99873	Protein arginine N-methyltransferase 1	2	PRMT1	sp|Q99873|ANM1_HUMAN Protein arginine N-methyltransferase 1 OS=Homo sapiens OX=9606 GN=PRMT1 PE=1 SV=3	25.2005	24.7596	25.0202	24.5512	23.6495	23.3431	25.5369	25.459	25.7998	24.9536	23.7994	22.3301	24.9275	25.2761	24.981	25.8221	25.46	25.8126	24.9753	25.2209	25.2952	25.3365	24.8378	23.8263	24.3014	23.7311	23.5566	25.9504	26.2514	26.3498	24.1131	24.2001	23.6232	26.7053	26.7123	27.3163	25.1754	24.0785	25.3827	24.6228	24.4778	23.2845	25.4277
	Q07021	Q07021	Complement component 1 Q subcomponent-binding protein, mitochondrial	1	C1QBP	sp|Q07021|C1QBP_HUMAN Complement component 1 Q subcomponent-binding protein, mitochondrial OS=Homo sapiens OX=9606 GN=C1QBP PE=1 SV=1	25.1981	24.749	23.9752	23.696	23.7649	23.755	25.8667	24.6872	25.0203	22.8215	22.6386	22.3783	25.1516	24.812	23.9391	25.7476	25.0786	26.008	24.0249	23.5054	23.1	23.6995	23.5829	24.8633	22.391	22.5878	23.046	27.041	26.8051	26.7204	22.9261	23.1875	21.6069	24.2105	24.2426	22.682	26.485	27.1924	26.9103	20.9675	22.8061	23.4275	23.9007
	O15144	O15144	Actin-related protein 2/3 complex subunit 2	1	ARPC2	sp|O15144|ARPC2_HUMAN Actin-related protein 2/3 complex subunit 2 OS=Homo sapiens OX=9606 GN=ARPC2 PE=1 SV=1	25.1969	25.0477	25.9069	24.7635	24.674	25.0198	25.987	25.0488	25.6715	25.2731	24.9488	24.7625	23.8292	24.2159	24.7648	24.9696	25.3478	24.7105	24.9217	24.8043	24.4926	25.2093	24.9339	23.7255	24.764	25.6649	23.0732	25.9043	26.3679	25.3086	25.4614	25.281	25.5618	24.1418	24.4146	23.188	25.9057	22.9297	26.3909	24.7572	24.7283	26.6748	24.9651
	P40938	P40938	Replication factor C subunit 3	1	RFC3	sp|P40938|RFC3_HUMAN Replication factor C subunit 3 OS=Homo sapiens OX=9606 GN=RFC3 PE=1 SV=2	25.1937	24.852	24.941	25.1929	25.5879	24.7304	25.3278	26.8129	26.0997	26.7511	26.3315	24.5973	26.7832	25.6055	25.3936	27.1283	26.4152	26.6555	25.1318	26.4151	25.5071	26.2804	25.9575	24.7686	25.7542	24.8831	25.2362	25.6494	26.6424	26.5554	26.0857	25.5408	25.2037	26.3196	26.1701	26.851	24.5053	26.0142	26.0672	25.4973	25.1011	23.7218	26.35
	P53621	P53621	Coatomer subunit alpha;Xenin;Proxenin	1	COPA	sp|P53621|COPA_HUMAN Coatomer subunit alpha OS=Homo sapiens OX=9606 GN=COPA PE=1 SV=2	25.1863	25.1698	25.2028	25.4873	25.2317	25.6265	25.493	25.1104	25.677	24.6206	25.3884	25.2225	24.7368	25.11	24.5908	24.9193	24.9374	25.0451	25.025	24.9858	25.1326	25.0219	24.7527	24.9991	24.8357	25.6023	24.5247	25.2711	25.1468	25.4431	25.0012	24.9187	24.9788	24.751	25.0248	24.7217	25.5734	24.5867	25.8475	25.0916	25.3828	24.6065	25.1589
	Q8TCU4	Q8TCU4	Alstrom syndrome protein 1	1	ALMS1	sp|Q8TCU4|ALMS1_HUMAN Alstrom syndrome protein 1 OS=Homo sapiens OX=9606 GN=ALMS1 PE=1 SV=4	25.186	25.0668	25.1385	25.7404	24.9761	25.0219	24.9384	25.3342	24.841	26.3145	25.3503	25.2284	25.2775	25.1825	25.0924	25.2947	25.3793	25.3664	25.1867	25.2762	25.1249	25.3231	25.3438	25.2598	26.3349	24.4423	25.5174	25.1908	25.2384	25.1235	25.6079	25.3814	25.236	25.6418	25.7271	26.1578	24.9657	25.2812	24.8541	25.1981	25.1722	26.932	24.9684
	P07199	P07199	Major centromere autoantigen B	1	CENPB	sp|P07199|CENPB_HUMAN Major centromere autoantigen B OS=Homo sapiens OX=9606 GN=CENPB PE=1 SV=2	25.1831	24.3386	24.8227	24.9285	22.7559	23.8536	24.5573	25.2119	24.3554	23.1798	24.192	23.9922	22.3491	25.3457	25.8861	23.3547	24.758	23.02	25.25	25.1196	25.9576	29.013	28.2221	26.7581	22.1468	24.3564	25.0741	23.8768	23.196	24.085	24.9511	24.0534	23.8828	24.5061	23.718	24.1318	24.5201	26.4019	23.9731	24.0315	23.8438	24.2112	24.6091
	Q99714	Q99714	3-hydroxyacyl-CoA dehydrogenase type-2	1	HSD17B10	sp|Q99714|HCD2_HUMAN 3-hydroxyacyl-CoA dehydrogenase type-2 OS=Homo sapiens OX=9606 GN=HSD17B10 PE=1 SV=3	25.1799	24.9467	24.9881	25.0254	25.2967	25.1896	25.0296	24.9597	25.0535	25.023	25.0853	24.8348	25.2655	25.55	25.0135	24.8198	24.9183	25.1731	24.7659	24.7998	25.2334	25.3745	25.1372	25.0667	25.0011	25.4651	25.1876	25.3049	25.4527	25.5054	24.9937	24.696	24.5642	25.3178	25.5002	25.4018	25.2016	24.6439	25.0524	25.4503	25.2042	23.2442	25.1507
	Q9P013	Q9P013	Spliceosome-associated protein CWC15 homolog	1	CWC15	sp|Q9P013|CWC15_HUMAN Spliceosome-associated protein CWC15 homolog OS=Homo sapiens OX=9606 GN=CWC15 PE=1 SV=2	25.1779	25.535	24.6845	25.0264	26.0596	25.2763	22.0073	24.5243	23.9371	25.3105	24.8394	25.4231	24.8242	25.2107	25.3454	25.1043	25.1776	24.904	25.1178	24.8361	24.2521	24.7334	24.7836	24.6389	25.0504	24.2227	24.9424	24.66	24.8736	24.2471	25.8566	25.3597	25.0141	26.8358	27.4167	27.5904	24.658	25.3831	24.5649	25.2275	25.154	25.7047	25.0707
	Q8ND76	Q8ND76	Cyclin-Y	1	CCNY	sp|Q8ND76|CCNY_HUMAN Cyclin-Y OS=Homo sapiens OX=9606 GN=CCNY PE=1 SV=2	25.1776	24.8451	24.9365	24.8252	24.9167	24.9553	25.7277	24.6924	25.4803	24.5331	25.0931	24.2636	22.874	24.263	24.6304	25.1083	24.034	24.4871	25.1365	24.9575	24.839	24.0912	24.4731	24.0981	25.6063	24.1813	25.0288	25.0748	24.7911	25.2929	24.4871	24.973	25.0404	23.151	24.3577	23.973	25.1987	23.7371	25.4563	24.7632	25.5775	23.3807	25.2218
	Q92900	Q92900	Regulator of nonsense transcripts 1	1	UPF1	sp|Q92900|RENT1_HUMAN Regulator of nonsense transcripts 1 OS=Homo sapiens OX=9606 GN=UPF1 PE=1 SV=2	25.1774	25.2609	24.9585	24.8233	25.1368	25.0393	25.7738	26.2008	25.8063	24.7645	25.0156	25.4253	25.0774	24.9817	24.8326	26.3574	26.6761	26.6091	24.8247	24.9805	25.0759	24.9079	24.7393	24.6614	24.8259	24.8247	25.0629	25.4787	25.7317	25.5574	25.1004	24.8848	25.1443	25.59	25.9628	26.0559	24.9923	25.2207	25.1011	25.1564	25.2011	25.8213	25.6628
	O00231	O00231	26S proteasome non-ATPase regulatory subunit 11	1	PSMD11	sp|O00231|PSD11_HUMAN 26S proteasome non-ATPase regulatory subunit 11 OS=Homo sapiens OX=9606 GN=PSMD11 PE=1 SV=3	25.1749	24.0447	24.8865	25.3248	26.0162	25.9718	25.2242	24.4067	25.9178	25.1344	25.4293	24.9418	23.5446	24.1668	24.3331	25.4279	24.2648	24.6637	24.1409	24.811	24.637	24.5658	24.287	24.682	24.2777	26.2477	24.056	25.2047	24.742	25.7482	24.0932	25.2444	24.444	24.5106	24.5622	24.1254	25.2199	22.303	25.9973	25.298	25.1641	25.6493	25.2368
	O00505	O00505	Importin subunit alpha-4	1	KPNA3	sp|O00505|IMA4_HUMAN Importin subunit alpha-4 OS=Homo sapiens OX=9606 GN=KPNA3 PE=1 SV=2	25.1743	24.9356	25.2418	24.082	25.209	24.5396	24.8277	25.6835	25.4239	25.4875	23.166	24.3257	26.6027	26.9103	26.3278	24.2285	25.3557	25.2992	25.4142	25.4757	24.8077	27.1681	26.9021	26.7844	25.1503	24.7929	25.4034	26.003	25.961	25.963	24.4873	25.2555	24.4839	25.2282	25.1242	23.4395	22.6502	25.3854	24.0907	24.8656	24.3943	23.6259	25.212
	P50579	P50579	Methionine aminopeptidase 2	1	METAP2	sp|P50579|MAP2_HUMAN Methionine aminopeptidase 2 OS=Homo sapiens OX=9606 GN=METAP2 PE=1 SV=1	25.174	23.6841	23.7531	23.0107	22.5686	22.807	23.7494	23.4594	23.826	22.1017	22.837	23.6336	23.3395	23.7392	22.8819	23.3872	23.5699	22.7416	23.2737	23.3004	23.5815	22.5427	23.3542	23.6037	23.1897	24.0853	23.6325	23.6757	23.503	23.5732	23.0564	23.2406	23.2375	22.5605	22.4473	23.3144	23.8071	23.31	24.9269	23.3868	23.3458	24.2261	23.4531
	Q9NPG3	Q9NPG3	Ubinuclein-1	1	UBN1	sp|Q9NPG3|UBN1_HUMAN Ubinuclein-1 OS=Homo sapiens OX=9606 GN=UBN1 PE=1 SV=2	25.1588	25.5697	25.3903	24.3725	23.4815	23.8832	22.4897	23.4588	23.2027	24.8166	25.2542	25.543	25.4544	24.7618	24.7891	24.8698	24.846	25.5341	24.0429	23.7657	22.4997	23.4378	23.6869	23.9017	26.0594	25.4383	26.8274	23.2835	23.0002	22.4314	25.6053	25.485	25.6582	25.2878	24.9694	25.0483	24.141	25.4499	23.7508	25.0909	25.4431	26.7446	23.389
	P04080	P04080	Cystatin-B	1	CSTB	sp|P04080|CYTB_HUMAN Cystatin-B OS=Homo sapiens OX=9606 GN=CSTB PE=1 SV=2	25.1534	25.2212	25.1728	24.0359	24.7079	24.45	25.439	25.6422	25.3122	25.064	24.6993	24.7851	25.5833	25.647	24.8294	25.1451	25.16	25.2036	24.8136	25.1701	25.1608	25.8737	25.2253	25.0665	23.8914	27.0624	24.0053	25.0726	25.6898	25.0309	24.9478	24.2878	24.2952	25.2106	25.0655	25.5617	24.6072	24.6194	25.3304	24.5343	24.5325	25.7437	25.3721
	O60341	O60341	Lysine-specific histone demethylase 1A	1	KDM1A	sp|O60341|KDM1A_HUMAN Lysine-specific histone demethylase 1A OS=Homo sapiens OX=9606 GN=KDM1A PE=1 SV=2	25.1523	24.7429	24.9715	24.312	24.2728	24.15	24.2231	24.6959	24.884	25.1494	24.2045	24.2462	24.8587	24.7674	24.9936	24.8023	24.7641	25.2533	23.9012	24.1308	24.3513	23.9009	24.1605	23.5139	24.571	24.5034	23.8617	24.3416	24.5287	24.1782	23.7681	24.8547	24.4676	24.7108	24.2187	24.722	23.9825	24.5953	23.1358	24.0278	24.3012	23.0194	24.5365
	Q6ZVM7	Q6ZVM7	TOM1-like protein 2	1	TOM1L2	sp|Q6ZVM7|TM1L2_HUMAN TOM1-like protein 2 OS=Homo sapiens OX=9606 GN=TOM1L2 PE=1 SV=1	25.1497	25.5771	24.9908	24.8949	24.5118	24.3642	25.9483	23.5897	25.6712	23.207	24.1401	23.8727	20.9924	21.1892	24.1003	24.357	23.1073	23.8819	24.55	24.3273	24.4289	23.3987	23.3542	24.4937	23.7945	21.4828	20.2093	23.7888	23.2982	24.5315	23.5477	24.6473	24.769	21.1787	21.5584	21.3253	25.5589	22.1936	25.6495	24.1448	24.3759	24.8696	24.2327
	P35611	P35611	Alpha-adducin	1	ADD1	sp|P35611|ADDA_HUMAN Alpha-adducin OS=Homo sapiens OX=9606 GN=ADD1 PE=1 SV=2	25.1484	25.1328	25.1439	25.7978	25.3713	25.5645	25.4369	24.312	25.5783	25.0188	24.9125	25.383	24.2949	24.5839	25.1867	24.2732	25.0632	24.5598	24.9212	24.9524	24.6389	24.7059	24.7445	23.8685	25.093	23.9725	24.0129	25.0279	23.8265	24.8732	24.9129	25.2952	25.3734	24.603	24.4969	23.8963	25.5849	23.4067	25.4111	25.4751	26.1056	25.5332	24.8918
	P08174	P08174	Complement decay-accelerating factor	1	CD55	sp|P08174|DAF_HUMAN Complement decay-accelerating factor OS=Homo sapiens OX=9606 GN=CD55 PE=1 SV=4	25.1481	24.9612	25.171	25.7886	24.1899	25.1638	25.7805	24.1933	25.2962	24.5995	25.0961	24.6456	23.7924	23.5099	24.8676	23.5348	24.0377	24.1288	24.2862	24.4149	25.0828	24.3512	23.42	24.2856	24.231	23.5412	21.6891	24.9614	23.9817	25.2807	23.9242	24.1483	24.7492	22.6462	23.8792	22.4724	25.3634	22.8098	25.1718	24.766	24.6624	24.5971	25.0333
	Q14676	Q14676	Mediator of DNA damage checkpoint protein 1	1	MDC1	sp|Q14676|MDC1_HUMAN Mediator of DNA damage checkpoint protein 1 OS=Homo sapiens OX=9606 GN=MDC1 PE=1 SV=3	25.1436	24.3038	24.5421	24.309	24.4239	24.5443	23.5695	23.8262	23.304	22.8938	22.3712	24.8514	24.8724	24.5744	26.4784	25.5668	24.5884	24.9276	24.8216	24.5075	24.3967	24.6758	25.5374	24.5698	23.9402	22.0558	24.914	25.2741	24.6157	24.5808	24.298	25.2981	23.8579	24.372	23.2728	23.708	24.2025	25.6372	24.4901	23.816	24.3788	26.1702	25.5393
	Q7L0Y3	Q7L0Y3	Mitochondrial ribonuclease P protein 1	1	TRMT10C	sp|Q7L0Y3|TM10C_HUMAN tRNA methyltransferase 10 homolog C OS=Homo sapiens OX=9606 GN=TRMT10C PE=1 SV=2	25.1407	25.0781	24.9781	25.5938	24.7299	25.8069	25.3512	25.8306	25.6264	25.6132	25.2775	24.1012	25.5694	25.8014	25.3481	25.9364	25.5551	25.643	25.2192	25.6203	25.5992	26.3128	26.2057	26.1372	25.3331	24.5724	24.8033	25.5079	25.7731	25.9741	25.0895	24.3735	24.7776	25.7039	25.4588	26.1156	24.8379	25.4301	25.5962	26.0382	25.1204	24.6204	25.5935
	P14868	P14868	Aspartate--tRNA ligase, cytoplasmic	1	DARS	sp|P14868|SYDC_HUMAN Aspartate--tRNA ligase, cytoplasmic OS=Homo sapiens OX=9606 GN=DARS PE=1 SV=2	25.1406	25.4414	25.1294	25.7149	25.3079	25.7356	25.4502	24.7845	25.3935	24.4103	25.4655	25.0783	25.2771	25.2209	24.9246	25.4585	24.7269	24.7938	25.1633	24.8454	25.4719	25.0925	24.7121	24.1907	24.8285	24.8949	24.4623	25.0212	25.0168	25.2995	25.1728	24.8658	25.5194	24.4504	24.8693	24.7637	25.4398	24.9173	25.5678	25.2076	25.5221	25.3986	25.2397
	O15027	O15027	Protein transport protein Sec16A	1	SEC16A	sp|O15027|SC16A_HUMAN Protein transport protein Sec16A OS=Homo sapiens OX=9606 GN=SEC16A PE=1 SV=4	25.1382	25.0136	25.1381	25.4743	25.3296	25.1572	24.4793	24.9804	24.9395	24.9041	24.5354	24.998	23.5399	22.2706	19.7292	24.3456	24.8584	24.8956	23.1635	23.6035	23.0805	22.4514	19.7029	22.7031	23.5847	23.1825	24.5031	22.8731	22.7723	24.1459	24.479	24.6743	24.6164	23.2418	23.8664	23.5758	25.6246	25.733	25.2993	24.8982	24.7482	26.2005	22.7803
	P31946	P31946	14-3-3 protein beta/alpha;14-3-3 protein beta/alpha, N-terminally processed	1	YWHAB	sp|P31946|1433B_HUMAN 14-3-3 protein beta/alpha OS=Homo sapiens OX=9606 GN=YWHAB PE=1 SV=3	25.1373	24.8396	25.0021	26.3112	25.464	26.6234	24.9964	24.2686	25.1387	24.3078	26.1868	26.2577	24.0807	24.8205	23.3943	23.8137	24.8311	24.7296	24.5489	23.4559	24.6995	24.543	24.1677	24.3473	25.4996	27.3028	24.9697	25.0828	24.7871	24.9581	25.9264	25.6357	25.9661	26.083	26.6292	26.4635	25.2844	24.3454	24.7827	25.634	25.5	26.001	24.4488
	P48634	P48634	Protein PRRC2A	1	PRRC2A	sp|P48634|PRC2A_HUMAN Protein PRRC2A OS=Homo sapiens OX=9606 GN=PRRC2A PE=1 SV=3	25.1367	25.2438	25.315	25.0541	25.25	25.0532	25.2662	25.3308	25.0954	24.4	24.5611	25.3845	24.7819	25.378	25.0846	25.3542	25.8807	25.5676	25.3771	25.3709	25.2613	25.3199	25.1828	25.4465	24.1992	24.1487	25.0256	25.5263	25.6439	25.2471	24.5595	24.9621	24.9583	25.0268	25.6317	25.5335	25.5196	25.3682	25.2197	24.5365	25.0876	26.0327	25.3299
	O95292	O95292	Vesicle-associated membrane protein-associated protein B/C	1	VAPB	sp|O95292|VAPB_HUMAN Vesicle-associated membrane protein-associated protein B/C OS=Homo sapiens OX=9606 GN=VAPB PE=1 SV=3	25.1356	24.5785	24.987	24.4644	24.8194	24.619	25.0706	24.4135	25.075	24.2846	24.4936	24.2609	24.6524	24.4334	24.5727	24.8397	24.7637	24.6775	24.1893	24.6552	24.5207	25.0093	24.444	24.3218	23.9905	24.8766	24.099	24.7323	24.7126	24.6119	24.654	24.4522	24.4937	24.1838	24.3774	23.571	25.2794	23.622	25.2186	24.4205	24.4007	24.669	24.2695
	P49006	P49006	MARCKS-related protein	1	MARCKSL1	sp|P49006|MRP_HUMAN MARCKS-related protein OS=Homo sapiens OX=9606 GN=MARCKSL1 PE=1 SV=2	25.1343	24.8745	25.1596	26.626	26.646	26.5415	25.4342	25.0068	25.0658	25.9957	26.1435	26.5452	24.992	25.2216	24.7919	24.9681	24.9368	24.5939	24.4995	24.646	24.5582	25.3923	24.8012	25.2408	26.5352	25.2222	26.6031	24.6671	24.8965	24.4146	26.7964	25.9029	26.488	25.8898	26.4897	26.0769	25.3456	24.2687	25.2654	26.3592	26.6284	28.3786	24.8145
	Q13555	Q13555	Calcium/calmodulin-dependent protein kinase type II subunit gamma	1	CAMK2G	sp|Q13555|KCC2G_HUMAN Calcium/calmodulin-dependent protein kinase type II subunit gamma OS=Homo sapiens OX=9606 GN=CAMK2G PE=1 SV=4	25.1338	25.2784	25.1464	25.4647	24.4625	24.6126	25.3409	24.2402	25.4213	24.6747	24.8554	23.8181	23.8096	23.0495	23.8297	25.0285	23.5411	24.2282	24.5847	24.5715	24.4061	24.0821	23.5586	23.745	25.0881	23.9722	22.349	24.4054	24.456	24.8686	24.7235	24.8899	24.7121	23.6885	23.0924	22.5854	25.172	22.6728	25.4538	24.873	24.8437	23.5729	24.5247
	P57678	P57678	Gem-associated protein 4	1	GEMIN4	sp|P57678|GEMI4_HUMAN Gem-associated protein 4 OS=Homo sapiens OX=9606 GN=GEMIN4 PE=1 SV=2	25.1324	24.8361	24.7504	24.9847	24.874	25.2891	25.3812	23.8977	25.5826	21.6465	24.8426	24.1082	19.7588	23.4908	24.0261	23.9797	23.9976	23.9273	24.4351	24.1763	23.4575	23.7601	23.5613	22.7309	24.8307	23.7275	22.7262	25.0549	25.3535	25.5852	24.3625	24.5103	24.3595	24.3604	23.5021	22.0254	25.6703	23.3141	25.5191	24.7673	24.6514	24.2208	24.258
	Q9HCE1	Q9HCE1	Putative helicase MOV-10	1	MOV10	sp|Q9HCE1|MOV10_HUMAN Putative helicase MOV-10 OS=Homo sapiens OX=9606 GN=MOV10 PE=1 SV=2	25.1309	25.0431	25.1003	24.5043	24.5524	25.4688	25.4629	26.1497	25.4855	24.4065	24.3703	24.5567	25.4406	25.1007	25.0587	26.2122	26.3118	26.2547	25.0547	24.7833	25.147	24.8853	24.9768	24.9954	24.3025	24.2007	24.9825	25.8252	26.2317	26.0303	24.9299	24.7357	24.5274	25.2291	25.6336	25.833	24.8052	25.4845	24.591	25.0371	25.0638	23.329	25.1998
	Q13472	Q13472	DNA topoisomerase 3-alpha	1	TOP3A	sp|Q13472|TOP3A_HUMAN DNA topoisomerase 3-alpha OS=Homo sapiens OX=9606 GN=TOP3A PE=1 SV=1	25.1301	25.2198	25.213	24.6275	24.7058	24.9234	25.0164	25.4322	24.6322	25.3746	25.1905	25.3371	25.534	25.0137	24.744	25.4162	25.5572	25.5331	24.7077	25.078	24.7691	24.7851	24.8808	24.8558	25.9629	25.0104	26.3137	24.9105	25.5059	24.9891	25.314	24.7323	25.3017	24.7347	25.2275	25.7508	24.6973	25.8706	25.0702	24.67	24.7081	24.0742	24.6466
	Q9Y520	Q9Y520	Protein PRRC2C	1	PRRC2C	sp|Q9Y520|PRC2C_HUMAN Protein PRRC2C OS=Homo sapiens OX=9606 GN=PRRC2C PE=1 SV=4	25.1254	24.5852	25.1307	26.6577	26.4975	26.4657	24.4807	25.4582	24.5401	25.1861	25.783	26.6331	24.3067	24.9051	22.2042	25.1345	25.0678	25.3496	24.6235	23.3549	23.0405	23.9012	23.1331	23.2647	26.0114	26.428	25.7739	25.5309	25.5372	24.5054	25.2202	26.1621	26.2048	26.4717	26.5822	26.2682	25.5465	23.6372	25.2228	26.1355	26.5065	26.18	24.0897
	Q15046	Q15046	Lysine--tRNA ligase	1	KARS	sp|Q15046|SYK_HUMAN Lysine--tRNA ligase OS=Homo sapiens OX=9606 GN=KARS PE=1 SV=3	25.1208	25.0332	25.0831	25.3934	24.9944	24.9542	25.1347	24.9797	25.3613	24.5936	24.712	24.92	24.5663	24.6377	24.6056	24.841	24.6438	24.8594	24.594	24.7526	24.3772	24.7945	24.5391	24.0265	25.3445	24.8889	23.7452	24.8896	24.3625	25.1123	25.1176	24.9135	25.2324	23.6135	24.4546	24.1305	25.5627	23.7364	25.2974	24.838	24.9917	25.6653	25.0409
	P62273	P62273	40S ribosomal protein S29	1	RPS29	sp|P62273|RS29_HUMAN 40S ribosomal protein S29 OS=Homo sapiens OX=9606 GN=RPS29 PE=1 SV=2	25.1187	25.96	25.5985	26.5659	27.2806	26.9375	24.488	24.4887	25.5177	27.6054	26.7551	26.8516	26.4443	25.78	25.4118	23.7382	25.7617	25.3047	26.1286	25.5589	26.0665	26.0012	26.1121	27.1294	27.038	27.478	28.0209	25.96	25.7774	25.1795	27.1908	27.361	26.9191	27.434	26.9502	27.924	25.6984	26.5752	25.3051	26.487	27.4529	26.1741	26.1835
	Q9NVP1	Q9NVP1	ATP-dependent RNA helicase DDX18	1	DDX18	sp|Q9NVP1|DDX18_HUMAN ATP-dependent RNA helicase DDX18 OS=Homo sapiens OX=9606 GN=DDX18 PE=1 SV=2	25.1156	24.3512	24.7723	23.8442	24.6063	22.4784	23.8423	24.6272	24.4618	25.7677	24.5702	25.1313	25.0992	24.6552	25.9485	24.9117	24.5091	24.897	25.6897	25.7295	25.8367	25.8935	26.3541	25.7394	24.9379	24.12	24.9743	25.1141	25.2105	24.3105	25.2866	25.176	25.1412	24.2995	23.133	23.2358	22.5626	25.3473	23.5425	22.4844	23.5068	24.1765	25.4409
	Q8WXH0	Q8WXH0	Nesprin-2	1	SYNE2	sp|Q8WXH0|SYNE2_HUMAN Nesprin-2 OS=Homo sapiens OX=9606 GN=SYNE2 PE=1 SV=3	25.112	24.4503	24.5993	25.1709	24.3315	25.1732	23.8007	23.4751	24.6643	23.6276	23.2212	25.2889	25.0943	24.1273	25.3005	25.5139	23.6628	24.5098	27.3298	26.7117	26.5355	25.9073	27.8005	25.6392	24.3669	25.1582	24.4463	26.3899	24.9449	24.2955	23.9501	25.7366	22.9906	22.8215	25.3011	25.975	24.7389	24.8053	25.5152	23.1541	25.6095	25.0796	24.6161
	Q15637	Q15637	Splicing factor 1	1	SF1	sp|Q15637|SF01_HUMAN Splicing factor 1 OS=Homo sapiens OX=9606 GN=SF1 PE=1 SV=4	25.1087	25.2126	25.0784	25.4106	25.1223	25.2231	25.0972	25.769	25.4917	24.5598	25.2985	25.6555	25.0573	25.2047	24.8895	25.2263	25.3754	25.4016	25.1107	24.6301	25.38	25.0535	24.9651	25.0663	25.1537	25.5832	24.6894	25.4583	25.5361	25.3358	25.2776	25.7283	25.3921	25.1723	26.0063	26.0807	25.0166	25.4013	24.9022	24.8858	25.3762	25.3315	24.7153
	P04843	P04843	Dolichyl-diphosphooligosaccharide--protein glycosyltransferase subunit 1	1	RPN1	sp|P04843|RPN1_HUMAN Dolichyl-diphosphooligosaccharide--protein glycosyltransferase subunit 1 OS=Homo sapiens OX=9606 GN=RPN1 PE=1 SV=1	25.1077	24.8659	24.8485	25.1224	24.8753	25.2824	24.9771	24.7384	25.1618	24.9203	24.9136	25.1091	24.6975	25.4538	24.7219	24.6535	24.9587	25.1055	24.9271	24.9091	25.4281	25.672	25.3246	25.2976	24.8126	25.2298	24.6674	25.2762	25.1701	25.4238	23.9631	24.6239	24.6059	24.9482	24.6977	24.443	24.9709	24.4672	25.3356	24.5404	24.8443	24.2682	25.2078
	P07948	P07948	Tyrosine-protein kinase Lyn	1	LYN	sp|P07948|LYN_HUMAN Tyrosine-protein kinase Lyn OS=Homo sapiens OX=9606 GN=LYN PE=1 SV=3	25.1017	25.1264	25.4012	25.4104	25.3441	25.3021	26.0294	24.6422	26.0947	25.3131	25.0079	24.3813	23.4517	23.1149	24.3913	25.2082	24.0571	24.7068	25.0106	25.0412	24.2608	24.6342	24.6734	21.6931	24.9448	23.3708	23.1418	25.1708	24.6234	25.4979	24.9019	25.0545	25.266	24.1884	23.7817	22.9407	25.54	20.4815	25.6526	25.5486	25.2708	24.1651	25.1737
	Q9H0A0	Q9H0A0	N-acetyltransferase 10	1	NAT10	sp|Q9H0A0|NAT10_HUMAN RNA cytidine acetyltransferase OS=Homo sapiens OX=9606 GN=NAT10 PE=1 SV=2	25.0986	23.9496	24.3909	23.0825	23.6505	23.7306	23.8642	23.8217	24.1948	23.5035	23.3307	23.7057	23.9975	24.156	25.7704	25.0237	24.1713	24.7033	25.5286	24.7798	25.2751	25.4392	25.8501	25.3334	23.9656	23.7273	24.5687	24.977	24.7344	24.4356	24.0852	23.9604	23.5011	23.3637	22.6163	23.2713	24.4672	25.2419	24.2564	22.873	22.4574	22.424	25.0827
	Q8TC07	Q8TC07	TBC1 domain family member 15	1	TBC1D15	sp|Q8TC07|TBC15_HUMAN TBC1 domain family member 15 OS=Homo sapiens OX=9606 GN=TBC1D15 PE=1 SV=2	25.0929	25.2111	25.3042	22.6064	27.1222	19.6194	29.0205	24.8863	24.9375	27.1633	20.2656	20.7596	23.8115	22.3407	24.6941	25.2927	28.6864	20.8787	24.8319	24.167	24.9134	24.7291	24.7041	24.4289	18.6464	25.8022	27.672	24.4637	20.827	23.6592	27.1954	26.8825	26.6428	27.5604	22.2587	19.7052	25.494	23.9756	22.5529	19.8061	21.3145	24.6764	22.0981
	P42694	P42694	Probable helicase with zinc finger domain	1	HELZ	sp|P42694|HELZ_HUMAN Probable helicase with zinc finger domain OS=Homo sapiens OX=9606 GN=HELZ PE=1 SV=2	25.0872	24.9942	24.9764	24.7508	24.8611	24.7968	24.6202	24.8486	24.659	25.1817	24.9061	24.8497	25.0315	24.829	25.1315	27.4028	27.6503	27.3582	24.9931	24.7224	25.0297	24.7772	24.9095	24.7713	24.7509	24.6402	25.1882	24.9932	23.4225	24.8821	24.129	24.4031	24.6014	25.4735	25.4466	25.0706	24.7391	25.2881	24.732	24.0799	24.974	24.6833	25.076
	Q6VMQ6	Q6VMQ6	Activating transcription factor 7-interacting protein 1	1	ATF7IP	sp|Q6VMQ6|MCAF1_HUMAN Activating transcription factor 7-interacting protein 1 OS=Homo sapiens OX=9606 GN=ATF7IP PE=1 SV=3	25.0869	25.1397	25.1712	26.8035	27.0468	26.8097	24.941	24.5749	24.8823	26.1288	26.884	26.962	24.7772	24.824	24.2366	24.6545	24.7676	24.7004	24.5897	24.4225	24.5179	24.6274	24.5287	24.6514	29.0465	28.4051	26.5022	24.7702	24.5654	24.4211	27.6311	29.4362	28.8623	26.5053	26.1861	26.2063	25.2084	24.2322	24.9702	28.5205	28.8367	27.4233	22.6357
	O95831	O95831	Apoptosis-inducing factor 1, mitochondrial	1	AIFM1	sp|O95831|AIFM1_HUMAN Apoptosis-inducing factor 1, mitochondrial OS=Homo sapiens OX=9606 GN=AIFM1 PE=1 SV=1	25.0856	25.3144	25.3809	25.4658	25.4937	24.9155	25.2276	25.4356	24.833	25.0082	25.4013	25.2699	25.4258	26.0743	25.1628	25.364	25.6717	25.8369	25.1769	25.135	25.3372	26.2295	26.0837	25.9904	24.81	25.1475	24.9891	25.5398	25.5533	25.3539	24.7789	24.9691	25.1437	25.8952	25.8474	26.3293	25.166	25.5365	25.4704	25.3367	25.371	25.6901	25.8692
	P15924	P15924	Desmoplakin	1	DSP	sp|P15924|DESP_HUMAN Desmoplakin OS=Homo sapiens OX=9606 GN=DSP PE=1 SV=3	25.0844	24.7003	25.0611	25.073	24.8469	25.1598	25.0583	24.4469	25.6806	26.3474	24.6442	24.5318	24.1694	24.8441	25.1188	26.0511	25.4197	25.0354	24.6636	25.0729	24.6703	24.8968	24.771	24.4122	24.8672	29.9121	24.0283	24.5777	24.5401	24.756	24.7917	24.354	24.3115	24.4827	24.5643	24.3318	24.6635	24.3621	25.2087	24.7319	25.1441	25.8137	25.2882
	Q07283	Q07283	Trichohyalin	1	TCHH	sp|Q07283|TRHY_HUMAN Trichohyalin OS=Homo sapiens OX=9606 GN=TCHH PE=1 SV=2	25.0777	26.0569	25.7839	27.0571	25.163	27.0003	25.3531	23.9774	25.1881	26.0093	25.6488	24.8979	23.6807	23.3362	24.7105	23.4573	24.2189	23.4539	24.8878	24.5498	24.4524	24.2857	24.0678	24.4009	25.7746	25.1927	23.3273	26.1432	24.6599	25.4893	24.3339	25.7118	25.6502	24.8478	24.3775	23.8868	25.8468	23.732	25.1065	26.4195	25.6421	23.9438	25.0269
	Q9BY43	Q9BY43	Charged multivesicular body protein 4a	1	CHMP4A	sp|Q9BY43|CHM4A_HUMAN Charged multivesicular body protein 4a OS=Homo sapiens OX=9606 GN=CHMP4A PE=1 SV=3	25.0747	25.1289	24.7815	23.7617	24.2353	24.0846	23.121	23.5088	23.2648	23.6966	24.3805	23.9456	24.2228	23.8272	24.5588	22.9442	23.9514	24.075	21.3854	21.7783	21.481	23.0916	23.257	23.3117	24.3666	23.9653	24.754	21.8461	22.8602	22.9936	25.3379	24.766	24.7798	23.3659	24.2179	24.5337	23.416	24.2418	23.7904	24.4553	24.5704	24.2717	22.0006
	Q92598	Q92598	Heat shock protein 105 kDa	1	HSPH1	sp|Q92598|HS105_HUMAN Heat shock protein 105 kDa OS=Homo sapiens OX=9606 GN=HSPH1 PE=1 SV=1	25.0729	24.9752	24.9808	25.3533	25.4368	25.3233	25.2909	25.0686	25.3649	25.1305	25.0469	24.8432	25.0591	25.0987	24.544	25.3621	25.0681	25.2181	24.9604	25.1381	25.0411	25.7218	24.9351	25.1504	24.8224	25.1814	24.5842	25.5612	25.4959	25.3227	24.8367	24.731	24.9581	25.1278	24.7358	25.1816	25.6588	25.0209	25.6518	24.927	25.1809	25.2969	25.0564
	Q86YT6	Q86YT6	E3 ubiquitin-protein ligase MIB1	2	MIB1	sp|Q86YT6|MIB1_HUMAN E3 ubiquitin-protein ligase MIB1 OS=Homo sapiens OX=9606 GN=MIB1 PE=1 SV=1	25.0721	24.8299	25.5477	25.46	25.1131	25.7344	25.9421	25.017	25.8826	25.3768	25.36	24.7582	24.4195	24.1844	24.5729	25.1155	24.6341	24.6665	24.6914	25.0393	24.7263	24.4045	23.9439	23.7108	24.0982	24.0675	22.9594	24.5135	24.4699	24.7136	25.1366	25.5369	24.8269	23.5327	24.117	23.5066	25.6769	23.651	25.6757	25.504	25.6399	25.384	24.7586
	P61158	P61158	Actin-related protein 3	2	ACTR3	sp|P61158|ARP3_HUMAN Actin-related protein 3 OS=Homo sapiens OX=9606 GN=ACTR3 PE=1 SV=3	25.0689	25.1447	25.4817	26.1043	25.1425	26.1135	25.9257	24.8227	25.8038	26.1424	25.9168	25.133	24.4364	24.2323	24.9475	25.1907	24.5855	24.8738	25.1022	25.3945	25.0749	25.1193	24.8495	24.5435	25.0127	25.9479	23.5816	24.8223	24.7171	25.3851	25.0568	25.1669	25.239	25.0762	23.8669	22.827	25.9518	23.9592	26.2356	25.497	25.2631	25.0239	25.0956
	Q9H2U1	Q9H2U1	ATP-dependent RNA helicase DHX36	1	DHX36	sp|Q9H2U1|DHX36_HUMAN ATP-dependent DNA/RNA helicase DHX36 OS=Homo sapiens OX=9606 GN=DHX36 PE=1 SV=2	25.0686	24.7196	24.8624	25.0188	25.1822	24.6499	25.2867	26.041	25.3013	25.2285	25.3323	25.1405	25.0601	24.6965	24.7198	25.5602	25.8335	25.7767	25.039	25.3665	25.0521	25.0365	25.1576	24.8218	25.2024	24.881	25.2766	26.3342	26.6742	26.501	25.7043	25.1881	25.0877	25.3465	25.6261	25.6842	24.5212	25.3629	24.7191	25.5292	24.913	26.095	25.2634
	Q14974	Q14974	Importin subunit beta-1	1	KPNB1	sp|Q14974|IMB1_HUMAN Importin subunit beta-1 OS=Homo sapiens OX=9606 GN=KPNB1 PE=1 SV=2	25.0657	24.8506	24.877	25.8708	25.711	25.7407	25.4118	24.9679	25.2734	25.8433	25.5031	24.535	27.1351	26.6137	26.6355	25.3528	25.0578	25.1005	24.8602	24.9776	24.9792	25.2226	24.9039	24.2307	25.0998	25.7953	23.9865	24.9527	24.7655	25.3157	25.2266	25.3773	25.4197	25.548	25.1882	25.151	25.0847	24.7775	25.3331	25.2594	25.3182	22.7086	25.3818
	Q15061	Q15061	WD repeat-containing protein 43	1	WDR43	sp|Q15061|WDR43_HUMAN WD repeat-containing protein 43 OS=Homo sapiens OX=9606 GN=WDR43 PE=1 SV=3	25.0619	22.7121	23.1119	22.4735	24.0941	22.8098	21.6373	22.5041	23.4955	23.8879	22.8141	23.3215	23.8808	22.9915	25.9402	24.5459	24.5165	24.3846	24.2624	22.6457	21.7171	24.2592	25.5176	23.3193	23.5321	23.6845	23.421	25.6304	25.0734	24.5696	22.8744	25.6045	23.4554	24.053	22.7408	24.0759	23.867	25.4232	23.4697	24.0314	23.4803	24.1094	25.8542
	Q02978	Q02978	Mitochondrial 2-oxoglutarate/malate carrier protein	1	SLC25A11	sp|Q02978|M2OM_HUMAN Mitochondrial 2-oxoglutarate/malate carrier protein OS=Homo sapiens OX=9606 GN=SLC25A11 PE=1 SV=3	25.0585	25.4455	25.3772	24.8997	25.6115	25.5435	24.9666	24.8997	24.7519	25.2603	25.2061	25.5719	25.5387	25.9181	24.842	27.0354	25.9707	25.8854	25.1403	25.3776	25.1998	25.3274	25.0047	25.8592	25.4068	24.8965	25.8817	25.0314	25.4688	25.2748	25.6473	25.2307	25.6009	25.6693	25.8409	26.3654	25.1308	25.5625	25.6235	24.758	24.6883	26.4349	25.0117
	P33991	P33991	DNA replication licensing factor MCM4	2	MCM4	sp|P33991|MCM4_HUMAN DNA replication licensing factor MCM4 OS=Homo sapiens OX=9606 GN=MCM4 PE=1 SV=5	25.0558	24.5153	24.3793	24.876	24.7327	24.765	24.596	24.6674	24.4507	25.1751	24.4235	24.6702	24.1524	24.4925	23.9794	24.3437	25.0518	24.7335	24.3815	24.7064	24.5857	24.5905	24.4623	24.5555	25.1894	24.6264	25.1479	24.8563	24.4641	24.8471	25.3979	25.0088	24.9216	24.7302	24.879	25.0299	24.7294	24.6777	24.9352	24.3813	24.7477	24.4352	24.5068
	Q8N5W9	Q8N5W9	Filamin-interacting protein FAM101B	1	FAM101B	sp|Q8N5W9|RFLB_HUMAN Refilin-B OS=Homo sapiens OX=9606 GN=RFLNB PE=1 SV=1	25.0528	24.859	25.2911	24.5749	24.2217	24.1503	25.1433	23.906	25.0239	23.5713	24.0942	23.7881	22.8266	23.8748	24.0631	23.8798	23.2799	23.7668	24.4083	24.2515	24.0644	23.4415	23.5189	23.7503	23.9227	22.0286	21.3185	23.9937	22.9935	23.9957	22.4172	24.0432	24.1572	21.4544	23.0097	22.7095	25.5199	23.1515	25.1552	24.0288	24.8054	25.67	24.3878
	O75475	O75475	PC4 and SFRS1-interacting protein	1	PSIP1	sp|O75475|PSIP1_HUMAN PC4 and SFRS1-interacting protein OS=Homo sapiens OX=9606 GN=PSIP1 PE=1 SV=1	25.0523	24.2704	24.284	24.8078	25.0866	24.1251	24.0937	24.5346	24.1881	25.3283	25.1447	24.7378	25.2179	24.5769	25.8378	25.875	25.0691	25.1476	24.7501	24.7364	24.8437	24.8985	25.5254	25.2116	25.3247	24.8471	25.6062	24.8702	25.2563	24.7529	25.8432	25.6428	25.6078	24.7397	25.1457	24.4124	24.3928	25.4508	24.8496	24.1497	25.1227	23.5792	24.7634
	Q9ULH0	Q9ULH0	Kinase D-interacting substrate of 220 kDa	1	KIDINS220	sp|Q9ULH0|KDIS_HUMAN Kinase D-interacting substrate of 220 kDa OS=Homo sapiens OX=9606 GN=KIDINS220 PE=1 SV=3	25.052	24.9557	24.4483	24.477	24.65	24.5707	24.903	24.8418	25.0671	25.5238	24.6964	24.7973	24.816	25.1231	24.6765	24.7957	24.9549	24.9968	24.0585	25.1067	24.9229	25.3293	25.8089	25.2611	24.6478	24.5666	24.4935	25.4042	24.8685	25.0394	24.8224	24.9562	25.8354	23.0912	24.3273	24.1808	24.8916	25.9292	24.299	22.1709	25.3731	25.9158	24.7695
	Q9BWH6	Q9BWH6	RNA polymerase II-associated protein 1	1	RPAP1	sp|Q9BWH6|RPAP1_HUMAN RNA polymerase II-associated protein 1 OS=Homo sapiens OX=9606 GN=RPAP1 PE=1 SV=3	25.0511	24.8164	25.1545	24.7392	24.134	25.4728	24.8376	23.8716	24.5479	24.4777	24.6316	24.1357	24.2626	24.5248	24.862	24.6672	24.544	24.3679	24.3896	24.1084	24.6018	24.3856	24.4892	24.6366	24.4827	24.5351	24.1811	25.2288	24.2278	24.6878	25.022	24.8854	24.4983	25.0895	26.1697	24.9824	25.294	22.4699	24.7911	24.4799	24.3975	25.968	24.8195
	Q9NWH9	Q9NWH9	SAFB-like transcription modulator	1	SLTM	sp|Q9NWH9|SLTM_HUMAN SAFB-like transcription modulator OS=Homo sapiens OX=9606 GN=SLTM PE=1 SV=2	25.0506	24.8563	25.2189	24.2691	24.9471	24.129	24.0313	24.7214	23.9267	24.5997	25.3711	25.1412	25.8113	25.5998	25.6386	25.1684	25.3297	25.3138	24.8018	24.4276	24.5101	24.6177	24.9494	24.7237	25.4838	24.7445	25.7557	25.4798	25.6182	25.0871	25.0949	25.2915	24.3785	25.9486	26.0762	26.35	24.6185	25.6363	24.5964	24.3529	24.8005	24.4265	25.5402
	Q86UP3	Q86UP3	Zinc finger homeobox protein 4	2	ZFHX4	sp|Q86UP3|ZFHX4_HUMAN Zinc finger homeobox protein 4 OS=Homo sapiens OX=9606 GN=ZFHX4 PE=1 SV=1	25.0419	25.6668	25.0975	24.6751	24.9786	24.9895	23.69	23.4457	23.7859	26.0667	26.4837	26.1219	25.6795	24.8796	23.3035	24.0592	24.714	25.2991	22.8251	22.7882	22.6335	23.8427	22.7559	23.4843	27.0383	25.3788	27.231	22.6049	24.5774	23.261	26.3161	25.8467	25.5199	25.2666	23.9296	26.2115	24.551	25.8986	24.0264	24.6324	25.7544	27.1241	22.1524
	Q9H910	Q9H910	Hematological and neurological expressed 1-like protein	1	HN1L	sp|Q9H910|JUPI2_HUMAN Jupiter microtubule associated homolog 2 OS=Homo sapiens OX=9606 GN=JPT2 PE=1 SV=1	25.0333	24.7729	24.9355	24.8693	24.4744	24.258	24.7983	24.753	24.475	24.0976	24.2779	24.4734	24.8189	25.113	24.3836	24.845	24.8253	24.9352	24.7032	24.1991	24.908	25.108	24.8766	24.8406	24.7782	24.03	25.1645	24.9653	24.2897	24.7543	24.5165	24.2071	24.2855	24.9088	24.8999	25.4933	24.9063	25.1819	24.3558	24.1872	24.46	27.2518	24.4102
	Q14980	Q14980	Nuclear mitotic apparatus protein 1	1	NUMA1	sp|Q14980|NUMA1_HUMAN Nuclear mitotic apparatus protein 1 OS=Homo sapiens OX=9606 GN=NUMA1 PE=1 SV=2	25.0324	24.6664	24.8978	25.2036	25.4445	25.4001	24.7387	24.4033	24.3966	25.0637	25.1149	25.1923	24.1508	24.0825	25.8132	25.179	24.7613	24.755	25.1173	24.7493	24.6589	24.4915	24.6485	24.0415	25.4777	24.6262	25.4731	24.6177	24.1332	24.431	25.637	25.4995	25.6139	24.4628	24.7746	24.9429	24.7511	25.3002	25.0757	25.0575	25.1926	26.5415	24.7556
	Q9NP66	Q9NP66	High mobility group protein 20A	1	HMG20A	sp|Q9NP66|HM20A_HUMAN High mobility group protein 20A OS=Homo sapiens OX=9606 GN=HMG20A PE=1 SV=1	25.0311	25.0739	24.6522	23.9453	24.8708	24.0121	24.1238	24.8021	24.573	24.3758	24.7325	24.6199	24.4911	24.4111	25.1596	24.3329	24.8645	24.9226	24.7667	24.5031	24.9098	23.7651	24.3531	24.4513	25.0799	23.9306	25.4058	24.4518	24.1077	24.3263	25.2398	25.409	24.7137	23.3551	23.2856	21.3317	24.2241	25.5908	24.3961	25.045	23.7079	26.3342	24.5151
	Q9Y6J0	Q9Y6J0	Calcineurin-binding protein cabin-1	1	CABIN1	sp|Q9Y6J0|CABIN_HUMAN Calcineurin-binding protein cabin-1 OS=Homo sapiens OX=9606 GN=CABIN1 PE=1 SV=1	25.029	25.4171	25.2058	24.626	24.6499	23.7234	23.6593	24.7313	23.2582	24.5636	24.3957	24.8746	25.3232	24.9349	24.5703	24.7482	25.2133	25.1146	24.406	24.3316	24.2413	23.1972	24.2052	24.3158	25.3889	24.8614	26.0046	23.0136	23.2545	23.9981	25.1044	25.1383	24.6244	24.4852	24.9391	24.9006	24.1422	25.1011	24.3028	24.6598	24.5254	25.3644	23.4394
	P19532	P19532	Transcription factor E3	1	TFE3	sp|P19532|TFE3_HUMAN Transcription factor E3 OS=Homo sapiens OX=9606 GN=TFE3 PE=1 SV=4	25.0277	25.5211	25.4677	24.6959	25.5259	24.7822	24.2913	25.301	24.5492	24.7407	24.2447	24.667	25.733	25.968	25.4603	25.1032	25.079	25.0231	24.5647	24.5782	24.5985	24.3056	24.6639	24.7782	25.7668	24.5132	25.8898	24.689	24.6863	24.108	24.4997	25.2372	25.5341	23.8942	24.7703	24.6568	25.2819	25.562	24.639	25.4862	25.0592	23.7579	24.6481
	Q9Y5A9	Q9Y5A9	YTH domain-containing family protein 2	1	YTHDF2	sp|Q9Y5A9|YTHD2_HUMAN YTH domain-containing family protein 2 OS=Homo sapiens OX=9606 GN=YTHDF2 PE=1 SV=2	25.0266	24.8544	24.8948	25.4612	24.9019	25.4922	25.1909	25.5479	25.1052	25.3562	25.7395	25.8019	25.1605	25.0582	24.5554	25.4169	25.9749	25.6355	24.7824	25.2106	24.771	25.6395	25.3199	25.4166	25.6792	25.1154	26.078	25.7938	25.8453	25.6447	25.0624	25.695	25.5628	26.2231	25.9529	25.8844	25.1761	25.388	24.9864	25.1758	25.2909	24.4232	25.6074
	P26639	P26639	Threonine--tRNA ligase, cytoplasmic	1	TARS	sp|P26639|SYTC_HUMAN Threonine--tRNA ligase, cytoplasmic OS=Homo sapiens OX=9606 GN=TARS PE=1 SV=3	25.0258	25.2832	25.3804	25.3026	25.0523	25.4682	24.9691	24.7843	25.1725	24.7014	25.2452	25.0712	24.504	25.6855	24.6579	24.797	25.31	25.2691	25.006	24.6424	25.0247	25.1764	24.5194	24.8786	25.0192	25.8179	24.4201	25.071	24.8415	25.0959	24.1709	25.4384	25.522	25.2592	25.891	25.2965	25.3956	24.9275	25.2829	25.4725	25.7882	25.4696	24.5442
	P55884	P55884	Eukaryotic translation initiation factor 3 subunit B	1	EIF3B	sp|P55884|EIF3B_HUMAN Eukaryotic translation initiation factor 3 subunit B OS=Homo sapiens OX=9606 GN=EIF3B PE=1 SV=3	25.0248	24.8551	24.9612	25.0597	24.9854	25.3973	24.9599	24.4396	25.5725	24.3829	24.6674	24.8745	23.9276	24.643	23.2914	27.0003	26.846	27.4269	24.8891	24.7947	25.2554	24.5685	24.0788	24.1668	24.5745	25.2675	23.8822	27.342	27.8699	27.872	24.7575	24.4259	24.5416	24.8738	25.243	25.0778	25.087	23.6909	25.6508	24.744	25.0889	24.2584	24.6742
	Q09161	Q09161	Nuclear cap-binding protein subunit 1	1	NCBP1	sp|Q09161|NCBP1_HUMAN Nuclear cap-binding protein subunit 1 OS=Homo sapiens OX=9606 GN=NCBP1 PE=1 SV=1	25.0231	24.7774	24.8819	24.8955	24.3308	24.8624	25.3456	26.1597	25.0932	24.821	24.8038	24.507	25.082	25.1897	25.1973	25.8012	25.6285	25.9126	24.3101	24.6838	25.0073	24.7099	24.6965	25.0704	24.9291	25.0108	23.6571	26.0988	26.4104	26.2267	24.7775	25.6907	24.9658	26.0422	25.7882	25.9283	24.7755	24.9552	24.6707	24.8063	24.769	23.044	25.8491
	Q9H6R4	Q9H6R4	Nucleolar protein 6	1	NOL6	sp|Q9H6R4|NOL6_HUMAN Nucleolar protein 6 OS=Homo sapiens OX=9606 GN=NOL6 PE=1 SV=2	25.0225	24.4064	24.5572	24.1514	24.3573	24.2962	23.9568	24.9708	24.4328	24.055	23.9268	24.9059	24.4795	24.0594	25.1758	25.5323	25.0302	25.0982	25.0762	25.0287	25.127	25.2879	25.6687	25.413	25.2304	24.8313	25.6053	24.9219	24.8938	24.8699	24.2492	24.8867	24.7542	24.8679	24.8747	24.3537	24.3997	25.2074	24.3676	24.5195	24.2842	24.6172	24.842
	Q15185	Q15185	Prostaglandin E synthase 3	1	PTGES3	sp|Q15185|TEBP_HUMAN Prostaglandin E synthase 3 OS=Homo sapiens OX=9606 GN=PTGES3 PE=1 SV=1	25.0222	24.1081	24.6012	24.3575	25.21	24.4603	25.179	25.4031	25.5035	25.4543	25.5933	24.8767	24.9121	25.3706	24.3193	25.2492	24.9713	25.8614	24.212	24.7907	24.9708	25.9817	25.9114	23.7501	25.3422	25.3376	22.442	24.9283	25.4588	25.9404	25.2802	24.3946	24.2827	25.3862	26.0245	25.2832	24.874	24.2277	25.1845	25.0061	25.2567	22.8635	24.8219
	P48047	P48047	ATP synthase subunit O, mitochondrial	1	ATP5O	sp|P48047|ATPO_HUMAN ATP synthase subunit O, mitochondrial OS=Homo sapiens OX=9606 GN=ATP5PO PE=1 SV=1	25.021	24.3053	24.6708	24.6933	24.8869	24.1829	24.9714	24.4978	24.7889	24.571	24.6077	23.8449	24.5753	26.026	25.2372	25.4282	25.1448	24.7894	23.9927	24.6721	24.7236	25.4419	25.3336	24.096	24.5206	25.1972	23.7246	24.9349	25.4616	25.0466	24.6056	24.1866	24.0047	25.1306	25.3828	25.5652	24.0876	23.6224	25.3049	24.7833	24.294	22.5682	24.9809
	Q14204	Q14204	Cytoplasmic dynein 1 heavy chain 1	1	DYNC1H1	sp|Q14204|DYHC1_HUMAN Cytoplasmic dynein 1 heavy chain 1 OS=Homo sapiens OX=9606 GN=DYNC1H1 PE=1 SV=5	25.0171	24.9412	25.0688	25.3406	25.1286	25.821	25.4576	24.7437	25.6068	24.9515	25.2516	24.9974	24.1334	24.5544	24.5664	24.8974	24.3873	24.6144	25.3301	24.8123	24.9059	24.606	23.821	24.1694	24.5727	25.9157	23.5003	24.9296	24.5313	25.0241	24.9028	24.8098	25.2807	24.6444	24.4349	24.375	25.9251	22.5504	25.9086	25.0514	25.2651	24.3207	24.9029
	P55209	P55209	Nucleosome assembly protein 1-like 1	1	NAP1L1	sp|P55209|NP1L1_HUMAN Nucleosome assembly protein 1-like 1 OS=Homo sapiens OX=9606 GN=NAP1L1 PE=1 SV=1	25.0083	24.8207	25.0265	25.3972	25.5212	25.1879	25.1716	25.4899	25.315	25.4935	25.5746	25.2905	25.0369	25.3413	24.6765	25.1156	25.0479	24.9941	24.8661	25.2907	25.127	25.8902	25.7148	25.4857	25.4738	25.0628	25.2673	25.1158	24.9877	25.4558	24.8329	25.0772	25.1134	25.1482	25.0547	25.5203	25.1857	24.6273	25.397	25.305	25.4518	25.7625	24.7565
	O14980	O14980	Exportin-1	1	XPO1	sp|O14980|XPO1_HUMAN Exportin-1 OS=Homo sapiens OX=9606 GN=XPO1 PE=1 SV=1	25.0046	24.537	24.5473	24.4244	24.7844	24.7976	25.1346	24.3679	24.8844	24.1312	24.1512	24.2639	24.7584	24.7253	24.8897	24.5904	24.641	24.6489	24.4003	24.5698	24.3954	24.835	24.576	24.1234	23.6526	24.0807	23.9376	25.1889	25.573	25.5157	24.3649	24.2099	24.2816	24.0873	24.2462	24.1151	24.8817	24.1285	25.1492	24.1969	24.329	23.4975	24.5384
	Q01780	Q01780	Exosome component 10	1	EXOSC10	sp|Q01780|EXOSX_HUMAN Exosome component 10 OS=Homo sapiens OX=9606 GN=EXOSC10 PE=1 SV=2	25.0023	24.6798	24.6482	24.4438	24.8124	24.6087	23.9554	23.9329	23.7987	24.4662	24.3917	25.3803	23.5797	24.5029	24.7858	23.9167	23.7472	24.0194	25.2488	25.0087	25.0421	25.2876	25.5235	25.1603	24.1786	24.4952	25.4262	24.5606	25.0806	24.3205	24.3388	24.2672	24.6464	21.5526	22.248	23.6592	24.8732	24.1429	23.3742	24.9028	25.214	23.992	23.4303
	Q14739	Q14739	Lamin-B receptor	1	LBR	sp|Q14739|LBR_HUMAN Lamin-B receptor OS=Homo sapiens OX=9606 GN=LBR PE=1 SV=2	25.0006	25.2485	24.4439	25.937	25.9459	25.512	24.8503	25.1598	24.1035	25.3659	25.315	25.4068	24.7034	25.1335	24.3185	25.3503	25.3516	25.4402	24.9814	24.5408	25.3742	25.1242	24.8544	25.0889	25.1036	26.2478	25.7807	25.8476	25.6346	25.5502	24.4081	25.0208	25.3456	25.895	26.0248	24.7535	26.1819	27.0879	26.0499	25.7039	25.6511	23.5636	24.9852
	O43583	O43583	Density-regulated protein	1	DENR	sp|O43583|DENR_HUMAN Density-regulated protein OS=Homo sapiens OX=9606 GN=DENR PE=1 SV=2	24.9993	24.7465	24.1793	25.5854	25.9186	25.6228	24.7311	25.1313	24.1578	24.6931	25.7947	25.0628	25.5081	24.5709	24.5029	23.912	25.0642	24.4472	24.2224	24.6676	24.926	25.1377	25.2679	25.2498	25.5674	26.6468	25.8534	25.1194	25.4499	24.2182	26.0719	26.0272	26.4329	26.2151	26.5875	26.5142	24.4271	24.562	24.4871	25.7587	25.8574	26.552	24.7605
	Q15019	Q15019	Septin-2	1	2002-09-01	sp|Q15019|SEPT2_HUMAN Septin-2 OS=Homo sapiens OX=9606 GN=SEPT2 PE=1 SV=1	24.999	24.7461	24.8368	25.1471	24.7567	25.0983	25.3649	24.8167	25.4838	24.2147	24.9563	24.6791	24.1233	24.5841	24.3054	24.4584	24.2756	24.7237	24.6816	24.7044	24.8193	24.6383	24.318	24.1511	24.1486	25.2031	23.0958	25.0529	24.658	25.3951	24.3946	24.4215	24.6442	24.6025	24.0964	23.5062	25.2899	23.7683	25.5439	24.6245	25.0454	25.1159	25.0537
	Q9NQT5	Q9NQT5	Exosome complex component RRP40	1	EXOSC3	sp|Q9NQT5|EXOS3_HUMAN Exosome complex component RRP40 OS=Homo sapiens OX=9606 GN=EXOSC3 PE=1 SV=3	24.9971	24.7341	24.8477	24.4983	24.5907	24.1343	24.083	24.6403	23.6446	24.5593	24.7206	25.2093	24.0889	23.7824	23.7272	23.6747	24.4462	23.9805	24.9153	24.7498	24.8627	24.9921	25.2746	24.9899	25.1792	24.4725	24.749	24.1162	24.4646	23.5352	24.5292	24.3078	24.7087	24.7941	24.5182	24.2104	24.4938	24.5754	23.745	24.2888	24.1312	25.4626	23.6605
	Q6UN15	Q6UN15	Pre-mRNA 3-end-processing factor FIP1	1	FIP1L1	sp|Q6UN15|FIP1_HUMAN Pre-mRNA 3-end-processing factor FIP1 OS=Homo sapiens OX=9606 GN=FIP1L1 PE=1 SV=1	24.9949	25.097	25.0833	24.9631	24.5658	24.7514	24.8331	25.6929	25.2313	24.7135	24.846	25.0511	24.875	24.8715	25.0535	25.3736	25.7381	25.7424	25.3245	25.0618	25.4001	25.2132	25.2025	25.2206	24.9272	24.5272	25.3733	26.1085	26.2144	26.0994	24.9115	24.5482	24.6246	25.9467	26.1749	26.4778	25.0927	25.3971	24.9689	24.6329	24.6967	25.2707	25.5383
	P07355	P07355;A6NMY6	Annexin A2;Putative annexin A2-like protein	2	ANXA2	sp|P07355|ANXA2_HUMAN Annexin A2 OS=Homo sapiens OX=9606 GN=ANXA2 PE=1 SV=2;sp|A6NMY6|AXA2L_HUMAN Putative annexin A2-like protein OS=Homo sapiens OX=9606 GN=ANXA2P2 PE=5 SV=2	24.9939	25.1077	25.1141	25.7428	25.5278	25.8488	25.5115	24.9037	26.0641	25.5507	25.3287	25.3251	24.4444	25.0986	24.9564	25.8941	25.0784	25.0401	25.1334	25.1288	25.4492	25.7135	25.1968	24.9451	24.8858	28.5184	24.4013	25.2976	25.0364	25.3334	25.0579	25.2719	25.3352	24.7827	24.7646	24.733	25.5095	24.8006	25.7882	25.2127	25.4984	24.9282	25.2599
	P61956	P61956	Small ubiquitin-related modifier 2	3	SUMO2	sp|P61956|SUMO2_HUMAN Small ubiquitin-related modifier 2 OS=Homo sapiens OX=9606 GN=SUMO2 PE=1 SV=3	24.9919	25.1089	24.7918	24.897	25.8485	24.91	24.2799	24.5335	24.1791	25.5091	25.5316	25.1692	25.7676	26.2381	25.2356	24.2065	25.013	24.8718	25.0516	24.4487	25.1331	25.4379	24.5684	25.2233	24.8904	25.909	25.5718	24.6635	24.7723	24.6233	24.7566	24.9998	24.4817	24.322	25.0808	24.6845	24.7377	24.6422	24.6657	24.6596	25.0298	26.3296	25.1344
	Q9P0M6	Q9P0M6	Core histone macro-H2A.2	1	H2AFY2	sp|Q9P0M6|H2AW_HUMAN Core histone macro-H2A.2 OS=Homo sapiens OX=9606 GN=H2AFY2 PE=1 SV=3	24.9893	21.9143	20.398	21.2489	21.7069	21.1577	21.84	20.5986	22.1531	21.697	19.2163	21.4817	21.1277	23.0936	26.3198	24.7867	23.2342	24.8739	23.2203	22.7958	22.106	23.0503	25.3597	22.2633	20.2599	20.1385	23.2138	24.246	24.1073	24.0492	22.2302	23.6672	21.0474	23.1088	21.3912	21.6325	19.8463	24.1949	23.9798	20.6058	20.736	22.3455	26.089
	Q9NZT1	Q9NZT1	Calmodulin-like protein 5	1	CALML5	sp|Q9NZT1|CALL5_HUMAN Calmodulin-like protein 5 OS=Homo sapiens OX=9606 GN=CALML5 PE=1 SV=2	24.987	24.4796	24.7326	25.4193	24.9306	24.0068	25.5382	25.2715	26.1185	26.0969	24.1631	24.8074	25.4281	26.1358	25.6206	27.0376	25.3178	24.6598	24.5053	24.9606	24.6195	24.6514	24.3003	24.3627	25.569	30.6614	25.6834	24.6681	25.1964	24.3909	24.4259	23.109	22.4743	24.5265	24.6782	24.9816	23.5671	25.0779	24.0324	23.6235	23.3624	25.8677	23.051
	Q12849	Q12849	G-rich sequence factor 1	1	GRSF1	sp|Q12849|GRSF1_HUMAN G-rich sequence factor 1 OS=Homo sapiens OX=9606 GN=GRSF1 PE=1 SV=3	24.981	24.7952	24.6187	25.0269	25.5237	25.5506	24.4724	24.6221	24.5468	25.5071	25.5921	25.9079	25.0244	24.3287	24.2457	24.864	24.3755	24.9241	25.39	25.6399	25.5629	25.8823	25.8332	25.6295	25.5498	24.8452	25.7241	24.6188	24.4484	24.4234	25.8208	25.3067	25.76	24.904	24.7487	24.758	23.9142	24.8284	24.2907	25.532	24.9577	25.4652	23.9809
	P06454	P06454	Prothymosin alpha;Prothymosin alpha, N-terminally processed;Thymosin alpha-1	1	PTMA	sp|P06454|PTMA_HUMAN Prothymosin alpha OS=Homo sapiens OX=9606 GN=PTMA PE=1 SV=2	24.9802	25.6875	24.9508	23.1286	23.4235	22.5953	23.5689	24.2029	23.8427	22.7687	22.4584	21.0377	25.2353	25.9911	24.0833	24.5728	25.6088	25.4089	24.891	24.207	24.5222	26.4688	24.7765	25.3054	23.1535	22.6938	24.1648	24.7801	24.4475	23.9471	23.9726	22.8792	22.9674	24.928	24.3852	23.7669	24.5117	23.6511	24.6945	24.0917	24.2854	23.7402	24.1398
	P27824	P27824	Calnexin	1	CANX	sp|P27824|CALX_HUMAN Calnexin OS=Homo sapiens OX=9606 GN=CANX PE=1 SV=2	24.9743	24.4806	24.4178	23.8562	24.0688	23.5458	24.8676	24.4279	25.3529	23.4687	23.5065	23.696	24.2468	25.2295	24.2638	24.5808	24.7624	24.7714	23.6922	24.5121	24.5526	25.0542	24.127	24.1453	22.8548	24.7983	23.039	24.2193	24.4195	24.6225	23.8507	23.1789	23.7363	24.0876	23.9858	23.7826	24.7516	22.2831	25.2426	23.8638	23.5905	22.8354	24.4819
	Q12931	Q12931	Heat shock protein 75 kDa, mitochondrial	1	TRAP1	sp|Q12931|TRAP1_HUMAN Heat shock protein 75 kDa, mitochondrial OS=Homo sapiens OX=9606 GN=TRAP1 PE=1 SV=3	24.968	24.6281	24.1959	24.118	24.5911	24.2121	23.8384	23.7136	24.3389	23.8813	23.8113	23.5663	24.3682	24.6569	23.9832	24.6859	23.8169	24.2132	24.5197	24.1913	24.1272	24.4798	24.007	22.7027	23.9155	23.5883	24.1197	24.643	24.4536	25.03	24.0491	23.4767	22.9417	24.2903	24.7672	24.7353	24.2271	21.0143	24.7938	24.0459	24.3077	22.98	20.7213
	Q27J81	Q27J81	Inverted formin-2	1	INF2	sp|Q27J81|INF2_HUMAN Inverted formin-2 OS=Homo sapiens OX=9606 GN=INF2 PE=1 SV=2	24.965	25.6798	25.4772	25.5019	25.7496	25.3452	25.3247	25.4058	24.8561	26.7439	26.2425	25.5855	25.4509	25.4226	25.129	25.2643	25.43	25.4124	25.2585	25.2652	25.3427	24.8685	25.2135	25.2602	25.6542	25.5573	25.4901	25.4608	25.3904	25.3065	25.7439	25.8844	25.6238	25.5021	25.5766	25.528	26.6641	25.2313	25.5571	25.3872	25.9426	26.1568	25.3411
	Q8IUE6	Q8IUE6	Histone H2A type 2-B	1	HIST2H2AB	sp|Q8IUE6|H2A2B_HUMAN Histone H2A type 2-B OS=Homo sapiens OX=9606 GN=HIST2H2AB PE=1 SV=3	24.963	22.6221	22.8897	22.126	23.6338	22.0972	22.368	23.7136	20.7426	23.8578	23.2772	22.9286	26.0326	24.7303	25.5922	25.9612	24.3133	24.8983	23.7028	23.6106	22.6694	24.3305	25.3798	22.5	23.1554	22.8205	23.5197	24.0889	24.5276	23.2451	24.4232	24.5372	23.141	24.7117	22.2352	22.6042	22.8016	24.9916	24.5517	22.3789	22.7882	23.1406	25.8479
	P47897	P47897	Glutamine--tRNA ligase	1	QARS	sp|P47897|SYQ_HUMAN Glutamine--tRNA ligase OS=Homo sapiens OX=9606 GN=QARS PE=1 SV=1	24.9629	25.0558	25.2924	25.7859	25.5638	25.7806	25.6704	25.1564	25.6744	25.5236	25.1178	25.1026	24.6292	25.0949	24.7149	25.4043	24.9077	24.8531	25.252	25.0776	25.1977	24.8244	24.5541	23.8021	25.3429	25.6301	24.7776	24.8645	24.7995	25.3878	25.3333	25.3082	25.2995	24.8718	24.5845	23.9966	25.5004	23.2351	26.1575	25.4755	25.8717	23.7951	24.5259
	Q9H981	Q9H981	Actin-related protein 8	1	ACTR8	sp|Q9H981|ARP8_HUMAN Actin-related protein 8 OS=Homo sapiens OX=9606 GN=ACTR8 PE=1 SV=2	24.9597	24.2629	24.6048	23.5925	23.7749	23.3145	23.2433	25.0287	23.8085	23.3303	23.4121	23.8265	24.7671	25.4545	25.0794	25.5233	25.8443	25.767	21.9701	24.5023	24.9331	24.8392	24.8199	24.3727	25.0627	23.5374	24.7215	24.2971	24.2896	24.2585	24.1642	24.606	24.1314	24.0979	23.5151	24.2729	24.5661	23.517	24.0496	23.7825	23.6782	22.747	24.7323
	Q13428	Q13428	Treacle protein	1	TCOF1	sp|Q13428|TCOF_HUMAN Treacle protein OS=Homo sapiens OX=9606 GN=TCOF1 PE=1 SV=3	24.9585	25.1541	25.0528	25.0377	25.2257	25.1516	24.5133	23.6842	24.5181	25.1602	24.9693	25.35	24.6056	24.9985	25.4403	24.7819	24.3406	24.3487	25.1418	24.7757	24.6203	25.7713	25.673	25.9081	25.4663	24.3613	24.9732	24.562	24.0214	23.961	25.1997	25.0666	25.0135	25.3967	24.626	24.7226	25.0986	24.3848	24.6009	24.226	24.9294	25.6745	24.7056
	Q9NW08	Q9NW08	DNA-directed RNA polymerase III subunit RPC2	1	POLR3B	sp|Q9NW08|RPC2_HUMAN DNA-directed RNA polymerase III subunit RPC2 OS=Homo sapiens OX=9606 GN=POLR3B PE=1 SV=2	24.9531	24.8328	24.7793	24.4527	25.0166	24.9562	24.4373	25.2926	24.64	25.2598	24.7945	25.2156	24.738	24.3914	24.3739	25.0242	25.2744	25.4704	24.4718	24.6974	24.9697	24.4425	24.4204	24.1772	24.2303	23.986	24.6215	24.4704	24.6893	24.7938	23.8633	24.2423	23.9444	23.9076	23.9275	23.7382	24.3956	25.413	24.5127	24.9041	24.6801	25.4878	24.6114
	Q9UKY1	Q9UKY1	Zinc fingers and homeoboxes protein 1	1	ZHX1	sp|Q9UKY1|ZHX1_HUMAN Zinc fingers and homeoboxes protein 1 OS=Homo sapiens OX=9606 GN=ZHX1 PE=1 SV=1	24.9525	24.8581	24.9154	24.8766	24.9557	24.8307	25.005	25.0145	25.0562	24.8059	24.8907	24.8401	24.9897	24.8127	24.9262	24.3424	24.7498	25.0569	24.838	24.8657	24.8498	24.598	24.6949	24.7271	24.8936	24.5576	24.9127	25.1952	25.1897	25.8305	24.7764	24.8474	24.8054	24.5147	24.4402	23.86	24.9195	24.8764	25.2909	24.7295	24.8178	24.8021	25.0083
	Q9Y6C9	Q9Y6C9	Mitochondrial carrier homolog 2	1	MTCH2	sp|Q9Y6C9|MTCH2_HUMAN Mitochondrial carrier homolog 2 OS=Homo sapiens OX=9606 GN=MTCH2 PE=1 SV=1	24.9488	24.3226	24.2713	24.2021	24.4092	24.1861	24.915	24.9939	24.3959	23.4424	24.2271	23.8343	25.0195	25.4239	24.5115	25.416	25.4855	25.3534	24.3342	24.0725	24.4032	25.4593	25.257	24.2565	23.0658	24.2324	23.511	25.2992	25.5442	25.4036	24.092	23.4555	23.8184	24.5199	25.2427	25.8467	25.1835	24.2751	24.7575	23.7614	23.511	22.811	25.071
	Q96EY1	Q96EY1	DnaJ homolog subfamily A member 3, mitochondrial	1	DNAJA3	sp|Q96EY1|DNJA3_HUMAN DnaJ homolog subfamily A member 3, mitochondrial OS=Homo sapiens OX=9606 GN=DNAJA3 PE=1 SV=2	24.9474	24.8712	23.1277	24.2838	24.0606	24.3499	24.3855	24.979	24.8213	24.4788	24.2132	24.2877	24.4191	23.66	25.3194	24.4801	24.5914	25.0083	25.5632	25.3002	25.8691	25.056	25.2284	25.2749	23.4744	23.3992	23.3124	25.2313	25.4189	25.4073	23.5601	23.6182	23.5975	24.5804	25.138	25.2882	25.26	26.0399	24.8416	23.8386	23.8209	23.5091	25.2208
	P12236	P12236	ADP/ATP translocase 3;ADP/ATP translocase 3, N-terminally processed	1	SLC25A6	sp|P12236|ADT3_HUMAN ADP/ATP translocase 3 OS=Homo sapiens OX=9606 GN=SLC25A6 PE=1 SV=4	24.945	25.0013	25.055	24.2468	24.6859	24.3531	25.4509	25.5649	25.3022	25.0093	24.8564	24.5368	25.5565	25.6282	25.2282	25.9658	25.8954	25.8202	25.2415	25.1463	25.5478	26.2455	26.0577	25.2374	24.5339	25.5824	24.1274	25.6674	26.1051	25.9782	25.3684	24.1956	24.3459	24.5091	25.4793	25.8781	25.4176	25.6412	25.7908	25.1262	24.7081	23.0383	26.2864
	P49720	P49720	Proteasome subunit beta type-3	1	PSMB3	sp|P49720|PSB3_HUMAN Proteasome subunit beta type-3 OS=Homo sapiens OX=9606 GN=PSMB3 PE=1 SV=2	24.9387	24.1724	24.2746	25.355	24.8208	25.9291	25.6236	23.6238	25.1257	23.4411	24.2005	24.1882	22.3996	23.7096	23.87	24.7899	24.2701	25.0346	24.0854	24.474	24.6782	24.2445	23.3051	23.4475	22.6819	24.0436	20.7998	24.9138	24.0943	25.0741	22.7517	22.3011	23.4107	23.3777	22.0437	21.4895	24.3042	22.5574	25.6255	24.7413	24.5589	23.2518	24.538
	Q8IZL8	Q8IZL8	Proline-, glutamic acid- and leucine-rich protein 1	1	PELP1	sp|Q8IZL8|PELP1_HUMAN Proline-, glutamic acid- and leucine-rich protein 1 OS=Homo sapiens OX=9606 GN=PELP1 PE=1 SV=2	24.938	22.7802	23.5423	22.3345	23.479	22.8416	23.2075	21.8027	23.1915	22.8184	21.5989	20.9263	24.4684	23.7836	25.4054	26.2031	24.9816	24.553	24.4383	23.715	22.7947	24.4758	25.1982	23.5301	22.4637	22.0387	23.1598	24.5674	24.9285	24.0005	21.22	23.2239	21.904	23.4838	22.9558	23.0954	24.0627	24.7171	23.9965	22.2173	22.5163	22.5033	25.3809
	P24928	P24928	DNA-directed RNA polymerase II subunit RPB1	1	POLR2A	sp|P24928|RPB1_HUMAN DNA-directed RNA polymerase II subunit RPB1 OS=Homo sapiens OX=9606 GN=POLR2A PE=1 SV=2	24.9379	22.079	23.4566	24.3967	24.7356	25.0564	23.5301	23.5857	24.6461	23.9607	23.1019	23.899	23.5458	23.8753	26.1474	24.7252	24.0597	24.2867	22.3566	21.2206	22.296	23.6662	24.4194	23.2821	25.2805	24.1005	25.9596	24.6669	23.7631	24.3789	24.245	25.2782	25.8186	24.5265	24.345	24.8066	24.5315	24.4676	24.4378	24.8017	25.0061	25.5267	25.3172
	P27708	P27708	CAD protein;Glutamine-dependent carbamoyl-phosphate synthase;Aspartate carbamoyltransferase;Dihydroorotase	2	CAD	sp|P27708|PYR1_HUMAN CAD protein OS=Homo sapiens OX=9606 GN=CAD PE=1 SV=3	24.9369	24.7073	24.8567	25.1476	25.4107	25.4896	25.7019	25.3478	25.7297	25.0277	25.2701	24.236	24.3545	24.7133	24.3334	25.0721	24.7877	24.8127	24.7726	24.8193	24.9415	24.7507	24.4435	23.1096	24.3045	24.0118	23.1476	25.9106	26.0901	26.1039	24.6244	24.6512	24.544	25.5979	24.987	25.1453	25.9455	25.4646	26.0674	24.751	25.0083	25.4429	24.8761
	P27449	P27449	V-type proton ATPase 16 kDa proteolipid subunit	1	ATP6V0C	sp|P27449|VATL_HUMAN V-type proton ATPase 16 kDa proteolipid subunit OS=Homo sapiens OX=9606 GN=ATP6V0C PE=1 SV=1	24.9348	25.0141	25.0128	23.6464	23.3419	23.9957	25.1852	24.6048	25.0842	23.479	24.3014	23.3079	24.4284	23.8623	25.1137	23.6393	24.4009	24.4107	24.906	25.0103	24.778	24.9802	24.6818	23.8625	23.8648	23.037	22.2139	24.137	23.6917	24.6868	23.7796	23.507	23.6516	23.5177	23.5185	23.41	25.0844	23.7483	24.7211	23.4002	23.922	23.5284	24.5842
	P46940	P46940	Ras GTPase-activating-like protein IQGAP1	1	IQGAP1	sp|P46940|IQGA1_HUMAN Ras GTPase-activating-like protein IQGAP1 OS=Homo sapiens OX=9606 GN=IQGAP1 PE=1 SV=1	24.9342	25.0984	25.1628	25.0362	25.1736	25.5296	25.6759	24.5683	25.3816	24.5968	24.8017	24.933	22.8925	24.0596	24.2368	24.3567	23.9535	24.0788	24.4492	24.3749	23.5951	24.0893	23.1111	23.9058	24.2343	26.4467	23.2736	24.2551	24.033	24.6438	24.1957	24.5012	24.2996	24.1081	23.8744	23.0728	25.4484	23.6153	25.7375	24.5618	23.964	24.428	24.1881
	P0DN79	P0DN79;P35520	Cystathionine beta-synthase	2	CBS	sp|P0DN79|CBSL_HUMAN Cystathionine beta-synthase-like protein OS=Homo sapiens OX=9606 GN=CBSL PE=1 SV=1;sp|P35520|CBS_HUMAN Cystathionine beta-synthase OS=Homo sapiens OX=9606 GN=CBS PE=1 SV=2	24.9338	25.0226	24.9786	25.9319	26.1212	25.7261	25.1518	24.7548	24.8797	25.6733	25.7084	25.547	24.7211	24.9481	24.4511	24.399	24.5935	24.7663	24.7785	24.6948	24.7198	24.6832	24.3508	24.5489	24.83	24.4282	24.9197	24.4401	24.8161	24.6731	25.3007	25.1105	25.4263	25.2263	25.4372	25.1465	25.3544	24.4956	24.9792	25.8157	25.8067	25.5048	24.7354
	P19525	P19525	Interferon-induced, double-stranded RNA-activated protein kinase	1	EIF2AK2	sp|P19525|E2AK2_HUMAN Interferon-induced, double-stranded RNA-activated protein kinase OS=Homo sapiens OX=9606 GN=EIF2AK2 PE=1 SV=2	24.9285	24.4974	24.9117	24.2142	24.6258	24.2051	25.4831	26.0244	25.4628	25.461	24.8454	24.8653	25.8606	25.7208	25.3942	25.8629	25.484	25.7951	25.0768	25.7878	25.4966	25.6742	25.8645	24.7206	24.6591	24.3193	24.9426	25.0314	25.3364	25.5869	24.8878	24.6722	24.2845	25.3714	24.7905	25.1514	23.6326	26.0425	25.5869	24.6109	24.3586	24.3989	25.6341
	P25786	P25786	Proteasome subunit alpha type-1	1	PSMA1	sp|P25786|PSA1_HUMAN Proteasome subunit alpha type-1 OS=Homo sapiens OX=9606 GN=PSMA1 PE=1 SV=1	24.9271	25.2402	24.9646	24.787	24.4539	24.7064	25.5696	24.2244	24.7949	24.1211	24.7833	23.9686	24.3861	24.7375	23.887	24.9828	24.8672	24.7453	23.3042	24.7399	25.1244	24.8393	24.2637	24.4134	24.284	25.7612	23.6104	24.657	24.699	25.4358	25.0536	24.778	24.7008	24.2922	24.3296	23.4165	25.3505	23.9929	25.924	24.9398	24.5246	25.2995	24.8061
	P00403	P00403	Cytochrome c oxidase subunit 2	1	MT-CO2	sp|P00403|COX2_HUMAN Cytochrome c oxidase subunit 2 OS=Homo sapiens OX=9606 GN=MT-CO2 PE=1 SV=1	24.9254	22.7123	24.4855	24.9372	24.4625	25.1708	24.5028	24.636	25.1011	23.8377	23.9091	22.9786	24.9581	25.7332	24.5898	25.3817	25.3947	25.3473	22.9001	24.5987	24.0074	22.0694	25.1784	23.9079	23.9069	25.0068	22.1478	25.3996	25.2036	25.0562	25.0724	23.757	23.3024	24.9264	25.5183	25.7008	22.5398	23.9933	25.6363	24.8725	24.9399	23.3686	25.0023
	O43852	O43852	Calumenin	1	CALU	sp|O43852|CALU_HUMAN Calumenin OS=Homo sapiens OX=9606 GN=CALU PE=1 SV=2	24.9234	24.7091	25.0534	24.3394	24.5811	24.0905	24.0696	24.079	23.8843	24.3659	24.8258	24.2468	23.9784	24.2588	23.7594	23.7533	24.5778	24.5398	26.0762	25.9162	25.9213	23.6948	24.0599	24.0741	24.0921	24.922	24.338	24.4423	23.9956	24.0735	24.9827	24.5077	24.1448	25.0887	26.0713	25.9436	24.59	24.4733	24.3497	24.25	24.7441	23.9438	24.9251
	Q7Z417	Q7Z417	Nuclear fragile X mental retardation-interacting protein 2	1	NUFIP2	sp|Q7Z417|NUFP2_HUMAN Nuclear fragile X mental retardation-interacting protein 2 OS=Homo sapiens OX=9606 GN=NUFIP2 PE=1 SV=1	24.9207	25.1664	25.015	24.0682	24.1469	24.3381	25.1107	25.9294	24.9562	24.4092	24.3973	24.6152	24.5869	24.2238	23.5035	27.2986	27.7514	27.8006	24.4464	24.5292	24.4995	24.109	24.1018	24.3627	24.9091	24.1975	25.4835	25.2104	25.5836	25.1393	25.1583	24.6084	25.0124	24.4801	24.4147	24.9885	24.1966	25.0728	24.0355	24.1236	24.4449	24.6633	24.725
	P51858	P51858	Hepatoma-derived growth factor	1	HDGF	sp|P51858|HDGF_HUMAN Hepatoma-derived growth factor OS=Homo sapiens OX=9606 GN=HDGF PE=1 SV=1	24.9184	24.9354	24.4671	24.828	24.3593	24.0667	23.8136	24.0904	23.9445	24.0954	24.1171	24.5393	23.3878	24.763	24.5898	24.6867	23.688	23.9908	24.7148	24.225	25.3638	24.3564	24.2099	24.6761	24.1391	24.9986	24.6478	24.6837	23.7317	24.295	24.0012	23.5375	23.4608	24.0155	25.4351	24.3996	24.4688	24.2419	23.8737	23.8555	24.7294	25.1693	25.0863
	Q9Y2V7	Q9Y2V7	Conserved oligomeric Golgi complex subunit 6	1	COG6	sp|Q9Y2V7|COG6_HUMAN Conserved oligomeric Golgi complex subunit 6 OS=Homo sapiens OX=9606 GN=COG6 PE=1 SV=2	24.9179	25.1624	24.8611	22.4958	24.0976	23.4015	24.3168	24.4327	24.3617	24.1594	24.0954	24.2165	25.1803	24.8726	24.6881	24.5502	24.9614	24.8247	24.7286	24.5789	24.6949	24.5586	24.868	25.0493	24.1093	23.9997	24.4378	24.8469	24.8083	24.5695	24.1148	24.186	24.0151	24.4276	24.6581	24.6778	24.6713	25.2353	24.3007	23.9628	23.9893	24.6121	24.6835
	Q9BWJ5	Q9BWJ5	Splicing factor 3B subunit 5	1	SF3B5	sp|Q9BWJ5|SF3B5_HUMAN Splicing factor 3B subunit 5 OS=Homo sapiens OX=9606 GN=SF3B5 PE=1 SV=1	24.9178	24.9497	24.7629	24.4326	24.1843	24.5983	24.2562	24.5104	23.1367	23.2149	23.7285	24.4557	24.8456	24.6726	24.7254	23.6821	24.8574	24.7639	24.3079	24.4329	23.9198	23.7626	24.3412	24.9039	24.8658	24.1201	24.6724	24.5048	24.0687	23.8725	24.6702	24.823	24.5558	24.7631	24.5849	24.9767	23.9522	24.912	23.5132	24.6958	24.4367	25.3182	24.567
	Q9Y5J1	Q9Y5J1	U3 small nucleolar RNA-associated protein 18 homolog	1	UTP18	sp|Q9Y5J1|UTP18_HUMAN U3 small nucleolar RNA-associated protein 18 homolog OS=Homo sapiens OX=9606 GN=UTP18 PE=1 SV=3	24.9169	22.8298	23.3917	24.5921	24.9984	24.5519	22.4862	23.3423	22.4772	23.1632	23.8176	23.3669	23.9099	23.3502	25.8163	25.1945	23.9407	24.5701	24.4342	21.9711	21.6627	24.6711	25.1529	24.9549	24.0777	23.3945	24.8746	25.3905	24.3292	24.2161	23.9255	26.0009	23.4588	24.3418	24.9757	25.1053	23.5042	25.2076	23.539	24.0987	23.6407	22.8167	25.4365
	Q9Y241	Q9Y241	HIG1 domain family member 1A, mitochondrial	2	HIGD1A	sp|Q9Y241|HIG1A_HUMAN HIG1 domain family member 1A, mitochondrial OS=Homo sapiens OX=9606 GN=HIGD1A PE=1 SV=1	24.9153	25.2939	24.7404	22.8773	23.1804	22.9726	24.304	23.2911	24.6658	22.3957	22.5256	23.1586	23.2212	24.4026	23.7174	23.171	24.4523	24.9861	24.6481	24.388	25.0178	25.1547	24.8087	25.0668	22.1283	24.8758	22.0181	24.4249	23.9538	24.5003	21.9144	23.2884	22.3702	23.0739	22.6317	20.9894	25.0794	24.8318	24.6169	22.2473	22.8806	22.1767	25.2021
	P00505	P00505	Aspartate aminotransferase, mitochondrial	1	GOT2	sp|P00505|AATM_HUMAN Aspartate aminotransferase, mitochondrial OS=Homo sapiens OX=9606 GN=GOT2 PE=1 SV=3	24.9131	23.929	23.4891	22.6227	24.2971	21.5461	23.0139	23.0167	23.3868	23.1945	22.5952	23.3542	24.0759	25.8379	23.8581	22.9482	24.4409	24.3103	23.4968	23.6614	24.6701	25.2375	24.0707	24.1012	22.232	26.1789	23.4544	24.0919	23.958	23.661	23.4381	22.6698	19.1521	24.683	25.8559	25.619	23.7743	23.366	23.6903	23.9514	23.538	23.871	21.4174
	Q66PJ3	Q66PJ3	ADP-ribosylation factor-like protein 6-interacting protein 4	1	ARL6IP4	sp|Q66PJ3|AR6P4_HUMAN ADP-ribosylation factor-like protein 6-interacting protein 4 OS=Homo sapiens OX=9606 GN=ARL6IP4 PE=1 SV=2	24.9089	24.1025	24.4576	22.1894	22.4411	22.9078	24.3569	24.056	24.0113	22.5186	22.2298	23.2863	24.407	24.5949	24.426	24.4349	24.4389	24.3952	24.7119	24.4719	24.1655	24.4156	24.2503	24.5613	23.8673	22.8436	23.5652	23.3781	23.4672	23.4634	24.1442	23.4482	23.271	23.2982	22.9644	23.3919	24.015	24.4514	24.4901	22.9859	22.6436	24.4439	24.9021
	Q8IWX8	Q8IWX8	Calcium homeostasis endoplasmic reticulum protein	1	CHERP	sp|Q8IWX8|CHERP_HUMAN Calcium homeostasis endoplasmic reticulum protein OS=Homo sapiens OX=9606 GN=CHERP PE=1 SV=3	24.9085	23.8762	24.3381	24.2201	24.0973	24.1305	24.2012	24.8564	24.4668	23.9989	24.8443	22.5109	24.6469	24.821	25.1118	24.5742	24.4819	25.0853	24.2636	24.3468	24.7718	24.7614	24.8606	23.3145	23.807	22.7618	23.9446	25.4532	25.7425	26.3407	24.5326	24.8354	23.9629	24.6508	24.9071	25.6149	24.1247	25.0791	24.9242	24.5101	24.2794	23.3833	25.2253
	Q86WJ1	Q86WJ1	Chromodomain-helicase-DNA-binding protein 1-like	1	CHD1L	sp|Q86WJ1|CHD1L_HUMAN Chromodomain-helicase-DNA-binding protein 1-like OS=Homo sapiens OX=9606 GN=CHD1L PE=1 SV=3	24.9074	25.3868	25.2614	25.0375	24.9684	24.9736	24.4646	25.2673	24.8327	24.9596	24.9783	25.3484	25.4815	25.42	25.0212	25.697	26.0235	25.8387	24.9842	25.4477	25.476	25.4444	25.4135	25.2558	25.1926	24.4791	25.4788	24.7059	25.3374	24.8467	24.9131	24.6822	24.8785	24.9758	25.069	25.4286	24.9772	25.548	25.1022	25.0102	25.2559	24.5886	25.7181
	Q12792	Q12792	Twinfilin-1	1	TWF1	sp|Q12792|TWF1_HUMAN Twinfilin-1 OS=Homo sapiens OX=9606 GN=TWF1 PE=1 SV=3	24.9057	24.887	25.2212	25.3851	24.751	25.4054	25.3577	24.7917	25.3342	25.5099	25.4977	24.9195	24.247	24.0402	24.2356	24.0916	24.4326	24.5634	24.4327	24.3305	24.5591	24.3238	23.9233	23.5735	25.187	24.9705	24.2187	23.9924	24.6237	24.6414	25.5443	24.8868	25.1822	24.5655	24.4422	23.6727	25.1104	24.0467	25.443	25.2579	25.1129	24.4842	24.7789
	P23526	P23526	Adenosylhomocysteinase	1	AHCY	sp|P23526|SAHH_HUMAN Adenosylhomocysteinase OS=Homo sapiens OX=9606 GN=AHCY PE=1 SV=4	24.9024	24.7861	24.6033	24.877	25.0055	24.9052	25.2254	25.3582	25.5914	25.0768	24.99	24.1245	24.5473	24.4378	24.0572	25.0138	24.1656	24.2828	24.0212	24.2768	24.5742	25.0115	23.81	23.6896	24.3953	25.2847	22.7649	25.0135	25.1858	25.7038	25.3116	24.8145	24.3655	24.9119	24.5872	24.7707	24.9493	22.6186	25.7649	24.8442	24.9583	23.4658	24.5347
	Q15149	Q15149	Plectin	1	PLEC	sp|Q15149|PLEC_HUMAN Plectin OS=Homo sapiens OX=9606 GN=PLEC PE=1 SV=3	24.9015	24.5465	24.9476	25.7175	25.0498	25.3551	25.1536	23.5042	25.0903	24.8693	25.2381	24.7385	23.1774	21.8373	24.6756	24.8245	23.8628	23.8974	23.8172	23.884	23.4893	23.9905	23.4312	22.8209	24.8281	27.697	22.2325	24.3208	23.4511	24.3698	24.8415	25.3205	25.3237	24.5753	23.8996	21.2938	24.9631	23.0994	25.2488	25.0357	25.3327	26.0298	24.7947
	P43487	P43487	Ran-specific GTPase-activating protein	1	RANBP1	sp|P43487|RANG_HUMAN Ran-specific GTPase-activating protein OS=Homo sapiens OX=9606 GN=RANBP1 PE=1 SV=1	24.9009	24.6108	24.5195	23.8423	23.7776	23.6107	24.8552	24.6031	25.061	24.2559	24.1858	23.5925	24.5896	25.2259	24.4143	24.3719	24.8313	24.8688	24.0348	24.3392	24.7091	25.2047	24.41	24.5581	23.2671	23.602	23.191	24.7003	24.677	24.778	23.5089	23.5489	23.8746	24.4183	23.9727	23.698	24.5311	23.7125	25.0706	23.8873	23.7604	23.4772	24.4113
	Q13162	Q13162	Peroxiredoxin-4	1	PRDX4	sp|Q13162|PRDX4_HUMAN Peroxiredoxin-4 OS=Homo sapiens OX=9606 GN=PRDX4 PE=1 SV=1	24.8993	25.1599	24.8847	25.7413	25.6991	25.2897	25.4414	25.2127	25.6843	25.478	24.7955	25.4073	24.7546	25.8055	25.4159	25.0225	24.9504	25.0452	24.6704	25.2785	25.2609	25.7361	25.3705	25.4575	25.1114	24.3406	25.3498	26.3809	26.5097	26.3423	25.161	25.1214	25.4584	25.4125	25.0766	24.7428	25.8632	23.7512	25.5436	25.5226	25.5881	25.1005	25.3465
	P22102	P22102	Trifunctional purine biosynthetic protein adenosine-3;Phosphoribosylamine--glycine ligase;Phosphoribosylformylglycinamidine cyclo-ligase;Phosphoribosylglycinamide formyltransferase	1	GART	sp|P22102|PUR2_HUMAN Trifunctional purine biosynthetic protein adenosine-3 OS=Homo sapiens OX=9606 GN=GART PE=1 SV=1	24.8954	24.3666	24.6158	24.5603	24.8945	24.8155	24.9819	24.7764	25.0633	24.7326	24.6431	24.2282	24.5713	25.2247	24.2891	24.503	24.7256	24.9204	24.2126	24.1684	24.8633	24.8315	24.7286	24.0921	24.5312	24.3785	23.5626	24.8902	25.0499	25.1239	24.5656	24.3061	24.0664	24.8464	24.9297	25.0655	24.7231	24.59	25.2459	24.8621	24.8465	24.2156	25.1148
	Q9GZS1	Q9GZS1	DNA-directed RNA polymerase I subunit RPA49	1	POLR1E	sp|Q9GZS1|RPA49_HUMAN DNA-directed RNA polymerase I subunit RPA49 OS=Homo sapiens OX=9606 GN=POLR1E PE=1 SV=3	24.8938	25.5544	25.2776	25.4566	25.5532	25.3684	25.3057	24.9571	24.8286	24.9848	25.5108	25.581	25.1961	24.826	25.1201	24.6415	25.1818	25.433	25.3432	24.6885	24.8898	25.7284	25.4137	25.8028	25.9187	25.7864	23.9282	24.4323	24.2193	23.8556	25.0155	24.8852	25.837	24.6098	25.8685	25.341	25.1376	25.7389	24.8677	24.8014	25.5033	27.468	24.8813
	O00178	O00178	GTP-binding protein 1	1	GTPBP1	sp|O00178|GTPB1_HUMAN GTP-binding protein 1 OS=Homo sapiens OX=9606 GN=GTPBP1 PE=1 SV=3	24.892	25.1554	24.8469	24.1909	24.3323	24.3197	25.0732	25.3622	24.7227	24.8875	24.9836	24.9784	24.881	25.2276	25.0409	24.3951	24.7683	24.8176	25.1517	25.2981	25.1171	25.7569	25.7078	25.6503	25.2783	24.0443	24.6624	25.043	25.335	25.2383	24.4917	24.5542	24.7334	24.3456	24.4548	24.4878	24.9307	25.1479	24.7698	24.8042	24.469	24.4685	24.6528
	Q9Y295	Q9Y295	Developmentally-regulated GTP-binding protein 1	1	DRG1	sp|Q9Y295|DRG1_HUMAN Developmentally-regulated GTP-binding protein 1 OS=Homo sapiens OX=9606 GN=DRG1 PE=1 SV=1	24.8912	24.3888	24.4464	24.7437	24.7017	24.8334	24.7459	25.3571	25.1918	24.8632	24.8414	24.6245	25.0961	24.8578	24.5113	24.5089	24.8906	24.7785	24.7201	25.0272	25.4968	25.1742	25.1582	25.1761	24.0671	24.7676	24.6063	24.5336	24.8641	24.4707	24.4939	24.5542	24.3047	24.4306	24.7271	24.7243	24.5882	24.8965	25.118	24.8176	24.3242	23.5455	24.8711
	Q5SW79	Q5SW79	Centrosomal protein of 170 kDa	1	CEP170	sp|Q5SW79|CE170_HUMAN Centrosomal protein of 170 kDa OS=Homo sapiens OX=9606 GN=CEP170 PE=1 SV=1	24.8892	25.6812	25.4521	26.0028	26.0186	25.932	25.254	24.4	25.2209	26.0074	25.8119	25.8994	24.0775	23.797	24.7743	25.0817	24.6664	24.4876	24.2173	24.7304	24.708	24.1218	24.4131	24.1336	25.9135	24.1208	25.3913	24.9446	24.5333	25.0968	25.745	25.9	26.1494	25.458	25.6524	25.8438	25.2094	25.0504	25.6858	25.704	25.85	26.4897	25.0141
	P35125	P35125	Ubiquitin carboxyl-terminal hydrolase 6	1	USP6	sp|P35125|UBP6_HUMAN Ubiquitin carboxyl-terminal hydrolase 6 OS=Homo sapiens OX=9606 GN=USP6 PE=1 SV=2	24.8887	29.5021	22.5852	28.9617	29.0979	28.6991	29.3962	23.5417	22.6121	29.054	28.8683	29.3001	24.1617	30.218	29.749	23.3127	23.5732	23.5559	25.0001	29.141	24.7457	29.3353	23.3355	30.0562	34.6405	28.5026	30.0831	22.7858	23.5678	23.0394	29.6832	29.0814	29.5623	29.2578	25.8427	25.6681	23.3958	23.8753	22.4195	29.4717	28.911	30.0541	23.4955
	O00712	O00712	Nuclear factor 1 B-type	1	NFIB	sp|O00712|NFIB_HUMAN Nuclear factor 1 B-type OS=Homo sapiens OX=9606 GN=NFIB PE=1 SV=2	24.8885	24.6726	24.6003	23.4795	23.6079	23.5764	23.4245	23.2561	23.4479	22.9016	22.8261	23.3578	24.9603	24.4229	24.8693	25.3558	25.6223	25.3472	23.5691	23.6964	23.6017	23.8847	23.934	24.2069	25.1868	24.1032	24.9571	23.7777	24.133	23.4882	24.4032	24.2596	23.9721	23.7478	23.8877	23.996	24.0251	24.8903	23.4035	23.0625	23.6914	23.3224	22.1423
	O95347	O95347	Structural maintenance of chromosomes protein 2	1	SMC2	sp|O95347|SMC2_HUMAN Structural maintenance of chromosomes protein 2 OS=Homo sapiens OX=9606 GN=SMC2 PE=1 SV=2	24.8809	24.5049	24.741	24.638	24.5939	24.764	25.115	24.5283	25.278	24.3852	24.6283	24.231	23.8815	24.4823	24.5516	24.4882	24.1366	24.3617	24.2815	24.7203	24.7886	24.4335	24.2159	23.6016	24.3966	22.3301	23.7135	25.1808	24.7602	25.5799	25.0309	24.5145	25.467	23.5397	25.0194	23.5081	24.7094	23.4311	25.6584	24.9084	26.5006	25.6776	24.7332
	Q15459	Q15459	Splicing factor 3A subunit 1	1	SF3A1	sp|Q15459|SF3A1_HUMAN Splicing factor 3A subunit 1 OS=Homo sapiens OX=9606 GN=SF3A1 PE=1 SV=1	24.8797	24.4292	24.4984	24.8858	24.8285	24.8065	24.7302	25.0472	25.152	24.7663	24.9484	24.3711	25.3007	25.1307	25.5014	25.466	25.1681	25.0135	24.3578	24.3213	24.4761	24.4284	25.0892	24.1204	24.5896	23.9233	25.0788	25.1001	25.0513	24.7665	24.9968	25.2185	24.7051	24.9738	24.905	25.1114	24.3742	25.0933	25.0534	24.0002	24.3212	25.8458	25.572
	P60900	P60900	Proteasome subunit alpha type-6	1	PSMA6	sp|P60900|PSA6_HUMAN Proteasome subunit alpha type-6 OS=Homo sapiens OX=9606 GN=PSMA6 PE=1 SV=1	24.8789	24.8316	25.2619	26.1534	25.6195	26.2274	25.3696	25.2095	25.9427	25.2141	25.0331	25.2734	25.0899	25.7136	25.001	25.6528	25.2405	25.099	25.1731	25.5566	25.228	25.2793	24.8844	24.3558	24.8578	26.5634	24.6227	25.3818	25.4203	25.3479	26.0064	25.4401	25.4795	25.5945	25.5126	25.1656	25.1578	23.6983	26.1549	25.5154	25.6292	25.6045	25.4241
	Q9BTD8	Q9BTD8	RNA-binding protein 42	1	RBM42	sp|Q9BTD8|RBM42_HUMAN RNA-binding protein 42 OS=Homo sapiens OX=9606 GN=RBM42 PE=1 SV=1	24.8753	24.5727	24.7971	22.8866	23.6076	22.9349	24.6172	24.9947	24.2518	24.0288	24.9747	24.0027	24.6956	25.271	25.0142	24.9094	25.0981	25.2515	24.9192	25.6663	25.4098	25.2753	25.187	25.2846	24.0317	23.5934	24.1598	24.5819	24.814	25.0169	22.896	24.5753	23.588	24.2598	24.3317	24.5377	24.5165	24.5972	24.6146	23.5875	23.7679	23.2968	24.4425
	Q02487	Q02487	Desmocollin-2	1	DSC2	sp|Q02487|DSC2_HUMAN Desmocollin-2 OS=Homo sapiens OX=9606 GN=DSC2 PE=1 SV=1	24.8751	22.2655	24.0945	24.1054	23.8758	24.3351	23.3631	21.7697	24.7013	23.3272	23.2259	22.3558	23.2621	22.352	24.2325	24.1319	23.5663	23.7232	24.0068	22.9795	21.1744	23.6066	24.0879	23.1466	23.8833	25.8919	23.8489	23.2647	23.117	24.1274	23.7154	24.81	23.4063	23.3626	22.9798	23.2446	23.6318	23.7855	23.8573	24.091	23.064	23.4533	24.8195
	Q8TEM1	Q8TEM1	Nuclear pore membrane glycoprotein 210	1	NUP210	sp|Q8TEM1|PO210_HUMAN Nuclear pore membrane glycoprotein 210 OS=Homo sapiens OX=9606 GN=NUP210 PE=1 SV=3	24.8743	23.6213	24.2167	22.3836	24.0447	23.1605	23.5098	23.2859	23.7622	23.3601	23.5783	23.9216	29.5171	29.0481	28.725	24.5824	24.4469	24.5162	24.0894	23.4316	23.9108	24.3399	24.5612	23.7282	22.9525	23.6431	23.7235	24.0378	23.9844	23.462	23.0957	24.3202	23.6475	23.3953	23.271	23.3303	24.2074	24.7047	24.2469	23.199	23.0466	23.9898	24.752
[truncated: 3,013 more rows]
[truncated: 56 more columns]
