# Supplementary material for: DEAD box RNA helicases are pervasive protein kinase interactors and activators
Source: HighWire-hosted journal article supplement (doi:10.1101/gr.278264.123), 2024-06-01
Supplement: Supplemental_Table_S4_.xlsx [file Supplemental_Table_S4_.xlsx]

## Sheet: Description
	Over-representational analysis (ORA) of interactome clusters #1-5

## Sheet: GO_molecular_function
	Cluster	ID	Description	GeneRatio	BgRatio	pvalue	p.adjust	qvalue	geneID	Count
	3	GO:0008022	protein C-terminus binding	11/190	160/11554	6.56946e-05	0.0229274	0.0212989	COIL/CD2AP/LIG4/CENPF/SP1/MIF4GD/PCGF1/HSPG2/PRKAA1/AFDN/MDC1	11
	4	GO:0003777	microtubule motor activity	2/13	44/11554	0.00107649	0.0343337	0.0212255	KIF4A/DNAH8	2
	4	GO:0140657	ATP-dependent activity	4/13	436/11554	0.00108996	0.0343337	0.0212255	KIF4A/DNAH8/SMARCAL1/SRCAP	4
	5	GO:0042393	histone binding	28/506	217/11554	2.6776e-07	0.000158782	0.000151073	HAT1/CBX8/KAT7/CHD8/TSPYL1/ZCWPW1/LRWD1/CBX2/ZMYND8/BAZ2A/SCML2/CXXC1/SUZ12/HPF1/STAT1/ATAD2/ANP32A/PHIP/USP16/SUPT6H/PHC2/UHRF2/PHC1/MPHOSPH8/TRIM24/DPF2/MCM3AP/USP15	28
	5	GO:0140030	modification-dependent protein binding	19/506	152/11554	3.52843e-05	0.0104618	0.00995389	CBX8/CHD8/ZCWPW1/UBQLN2/LRWD1/CBX2/ZMYND8/BAZ2A/ABRAXAS2/CXXC1/SUZ12/RNF169/PHIP/IKBKG/AGAP3/MPHOSPH8/TRIM24/DPF2/USP15	19
	5	GO:0003682	chromatin binding	39/506	485/11554	0.00017559	0.0347083	0.0330233	ATF4/ERCC3/NELFE/SMARCAD1/CHD8/TSPYL1/LRWD1/CBX2/MEN1/MORF4L1/MBD3/SCML2/ERCC6/SUZ12/HPF1/STAT1/ATAD2/RNF169/SUPT6H/KDM3B/CDK9/PBRM1/DNMT3A/NKX2-5/SLC30A9/PHC2/URI1/EP400/NSD1/SMARCD1/SIN3A/PHC1/MPHOSPH8/TRIM24/POLR3G/GATA6/MCM3AP/SMARCA1/CDCA5	39
	6	GO:0004252	serine-type endopeptidase activity	4/36	83/11554	0.00012242	0.00849273	0.00651322	KLK10/KLK6/KLK7/PRSS57	4
	6	GO:0008236	serine-type peptidase activity	4/36	97/11554	0.000223777	0.00849273	0.00651322	KLK10/KLK6/KLK7/PRSS57	4
	6	GO:0017171	serine hydrolase activity	4/36	101/11554	0.000261371	0.00849273	0.00651322	KLK10/KLK6/KLK7/PRSS57	4
	6	GO:0004866	endopeptidase inhibitor activity	4/36	104/11554	0.000292404	0.00849273	0.00651322	CAST/PI3/SERPINB4/SERPINB2	4
	6	GO:0030414	peptidase inhibitor activity	4/36	105/11554	0.000303312	0.00849273	0.00651322	CAST/PI3/SERPINB4/SERPINB2	4

## Sheet: GO_biological_process
	Cluster	ID	Description	GeneRatio	BgRatio	pvalue	p.adjust	qvalue	geneID	Count
	2	GO:0140053	mitochondrial gene expression	15/409	103/11231	4.42291e-06	0.0160994	0.0158387	SUPV3L1/FASTKD5/PNPT1/NOA1/DARS2/MRPL51/FASTKD1/MRPL16/TACO1/MRPS24/SARS2/TARS2/MRPS6/MRPS21/TSFM	15
	2	GO:0032543	mitochondrial translation	11/409	71/11231	4.6675e-05	0.0443075	0.04359	NOA1/DARS2/MRPL51/MRPL16/TACO1/MRPS24/SARS2/TARS2/MRPS6/MRPS21/TSFM	11
	2	GO:0007059	chromosome segregation	25/409	287/11231	4.84551e-05	0.0443075	0.04359	SMC5/WAPL/SPC24/SPICE1/TRIP13/CUL3/ZW10/WRAP73/RAD18/PDS5B/INO80/ANAPC5/CDK5RAP2/KATNB1/CENPT/CHMP6/EHMT2/EML4/NDC80/ERCC2/NCAPD3/TERF1/TOP3B/CIAO1/SUN1	25
	2	GO:0000226	microtubule cytoskeleton organization	36/409	491/11231	4.86896e-05	0.0443075	0.04359	CUL9/CEP57/GAS2L3/CEP68/CKAP2/SPICE1/TBCE/ROCK1/TUBB2A/MAP1S/CCSAP/ZW10/CEP350/WRAP73/INTS13/FBXW11/INO80/RANBP9/CDK5RAP2/LZTS2/KATNB1/HAUS1/CHMP6/EML4/NDC80/CEP44/DLG1/OBSL1/CDK5/GJA1/NCOR1/GSK3B/MARK3/SRGAP2/HAUS5/SUN1	36
	5	GO:0016570	histone modification	42/492	430/11231	8.40481e-07	0.00319635	0.00310713	HAT1/CBX8/AURKA/KAT7/TRIM16/NELFE/SMARCAD1/CHEK1/SKI/SAP30BP/TAF4/MEN1/MORF4L1/BAZ2A/MBD3/USP36/DMAP1/TAF5/CXXC1/SUZ12/HPF1/KDM2B/HASPIN/USP16/PAXIP1/PPM1F/SUPT6H/KDM3B/BPHL/CDK9/TAF6/SDR16C5/AKAP8/EP400/NSD1/SIN3A/PHC1/NFYC/RTF1/MCM3AP/USP15/MCRS1	42
	5	GO:0071539	protein localization to centrosome	9/492	32/11231	6.28304e-06	0.0119472	0.0116137	AURKA/C2CD3/KIAA0753/GOLGB1/CEP72/CEP192/PIBF1/CSNK1D/APC	9
	5	GO:0018394	peptidyl-lysine acetylation	20/492	160/11231	2.20634e-05	0.0209768	0.0203912	HAT1/KAT7/TRIM16/CHEK1/HINT2/TAF4/MORF4L1/DIP2A/MBD3/DIP2B/DMAP1/TAF5/PAXIP1/TAF6/SDR16C5/EP400/SIN3A/NFYC/MCM3AP/MCRS1	20
	5	GO:0140694	non-membrane-bounded organelle assembly	31/492	328/11231	4.5117e-05	0.0302665	0.0294216	AURKA/CEP295/C2CD3/PAN2/KIAA0753/LIMD1/CNOT1/ANLN/PWP2/CENPE/PAN3/NGRN/ABRAXAS2/CEP72/CEP192/PUM2/NEK7/CCP110/POC1B/PIBF1/AUP1/POGZ/HAUS6/CEP97/NKX2-5/CSNK1D/CEP63/HAUS3/LMOD1/MTERF3/CHMP4C	31
	5	GO:0000289	nuclear-transcribed mRNA poly(A) tail shortening	7/492	25/11231	7.16273e-05	0.0302665	0.0294216	PAN2/CNOT1/PAN3/TNRC6A/SAMD4B/CNOT3/TUT7	7
	5	GO:0034470	ncRNA processing	34/492	394/11231	0.000120963	0.0342359	0.0332802	QTRT2/FCF1/RPF1/ELP3/AGO3/MAK16/METTL1/LAGE3/AGO1/POP4/TRMT6/TSR3/USP36/TRMU/PWP2/OSGEP/UTP20/TRMT1/SRFBP1/SNIP1/TSEN15/PUM2/TRMT10A/PUS1/PUSL1/WDR75/RIOK1/DUS3L/INTS3/UTP4/GTPBP3/DGCR8/TUT7/INTS12	34
	5	GO:0006270	DNA replication initiation	8/492	36/11231	0.00013095	0.0342359	0.0332802	KAT7/LRWD1/ORC3/POLA2/MCM10/NBN/ORC2/TOPBP1	8
	5	GO:1901987	regulation of cell cycle phase transition	30/492	332/11231	0.000135035	0.0342359	0.0332802	ERCC3/AURKA/BUB1B/CHEK1/GPNMB/MEN1/SYF2/ECD/CDC23/ANAPC4/ANLN/AVEN/ERCC6/CENPE/KLHL18/PBX1/RINT1/PAXIP1/METTL13/NBN/CEP63/NSMCE2/APC/SIN3A/PCID2/INTS3/TOPBP1/CHFR/CDCA5/CHMP4C	30
	5	GO:0007099	centriole replication	8/492	37/11231	0.000160753	0.0382089	0.0371423	CEP295/C2CD3/KIAA0753/CEP72/CEP192/CCP110/POC1B/CEP63	8
	5	GO:0033044	regulation of chromosome organization	21/492	202/11231	0.000208423	0.0414824	0.0403244	BUB1B/MAP2K7/CDC23/ANAPC4/TFPT/CENPE/POT1/NEK7/DCP2/XRN1/TACC3/NBN/NSMCE2/APC/SIN3A/TINF2/MPHOSPH8/PCID2/CHFR/MCRS1/CDCA5	21
	5	GO:0009913	epidermal cell differentiation	16/492	136/11231	0.000293011	0.04564	0.044366	BCR/ERCC3/TRIM16/SPRR2G/LCE3D/SAV1/TPRN/ROCK2/KRT6B/CERS3/SPRR2D/LCE2C/LORICRIN/TSG101/GATA6/S100A7	16
	5	GO:0030216	keratinocyte differentiation	13/492	97/11231	0.000299539	0.04564	0.044366	BCR/TRIM16/SPRR2G/LCE3D/SAV1/ROCK2/KRT6B/CERS3/SPRR2D/LCE2C/LORICRIN/TSG101/S100A7	13
	6	GO:0019730	antimicrobial humoral response	5/34	42/11231	1.46907e-07	0.000105332	9.92781e-05	DEFB4A/PI3/RNASE7/SEMG2/KLK7	5
	6	GO:0006959	humoral immune response	5/34	96/11231	9.39531e-06	0.00224548	0.00211642	DEFB4A/PI3/RNASE7/SEMG2/KLK7	5
	6	GO:0010951	negative regulation of endopeptidase activity	5/34	159/11231	0.000106629	0.0126384	0.011912	ANXA8L1/CAST/PI3/SERPINB4/SERPINB2	5
	6	GO:0010466	negative regulation of peptidase activity	5/34	164/11231	0.000123387	0.0126384	0.011912	ANXA8L1/CAST/PI3/SERPINB4/SERPINB2	5
	6	GO:0052548	regulation of endopeptidase activity	6/34	289/11231	0.000201954	0.0181001	0.0170598	ANXA8L1/CAST/PI3/SEMG2/SERPINB4/SERPINB2	6

## Sheet: GO_cellular_component
	Cluster	ID	Description	GeneRatio	BgRatio	pvalue	p.adjust	qvalue	geneID	Count
	2	GO:0000313	organellar ribosome	14/420	80/11608	9.03226e-07	0.000208645	0.000197284	MRPL41/MRPL55/MRPL50/MRPL28/MRPL51/NSUN4/MRPL16/MRPS33/MRPS24/MRPL46/MRPS26/MRPS6/MRPS21/MRPL19	14
	2	GO:0005761	mitochondrial ribosome	14/420	80/11608	9.03226e-07	0.000208645	0.000197284	MRPL41/MRPL55/MRPL50/MRPL28/MRPL51/NSUN4/MRPL16/MRPS33/MRPS24/MRPL46/MRPS26/MRPS6/MRPS21/MRPL19	14
	2	GO:0008180	COP9 signalosome	5/420	12/11608	3.88527e-05	0.00448748	0.00424312	COPS7A/COPS3/COPS8/COPS7B/PLCG1	5
	2	GO:1902555	endoribonuclease complex	7/420	32/11608	0.000118529	0.00782291	0.00739692	RPP25L/TARBP2/DICER1/AGO2/RPP30/RPP38/RPP40	7
	2	GO:0098798	mitochondrial protein-containing complex	22/420	256/11608	0.000152897	0.00882979	0.00834897	IDH3B/MRPL41/SUPV3L1/MRPL55/PNPT1/MRPL50/MRPL28/TIMM17B/MRPL51/NSUN4/MRPL16/MRPS33/MRPS24/UQCRQ/MCCC2/MRPL46/MRPS26/ATP5PF/MRPS6/MRPS21/MRPL19/IDH3A	22
	3	GO:0000314	organellar small ribosomal subunit	5/191	26/11608	5.68422e-05	0.00972002	0.00930418	MRPS16/MRPS12/MRPS5/MRPS11/MRPS10	5
	3	GO:0005763	mitochondrial small ribosomal subunit	5/191	26/11608	5.68422e-05	0.00972002	0.00930418	MRPS16/MRPS12/MRPS5/MRPS11/MRPS10	5
	5	GO:0000932	P-body	15/504	80/11608	1.45959e-06	0.000738552	0.000683702	AGO3/PAN2/CARHSP1/LIMD1/AGO1/CNOT1/PAN3/TNRC6A/DCP2/XRN1/LSM1/SAMD4B/CNOT3/MEX3A/CNOT9	15
	5	GO:0000792	heterochromatin	11/504	67/11608	0.000131029	0.027643	0.0255901	CBX8/SMARCAD1/LRWD1/CBX2/BAZ2A/MBD3/SUZ12/DNMT3A/UHRF2/ORC2/MPHOSPH8	11
	5	GO:0016442	RISC complex	5/504	14/11608	0.000218522	0.027643	0.0255901	AGO3/LIMD1/AGO1/TNRC6A/DCP2	5
	5	GO:0031332	RNAi effector complex	5/504	14/11608	0.000218522	0.027643	0.0255901	AGO3/LIMD1/AGO1/TNRC6A/DCP2	5
	5	GO:0034708	methyltransferase complex	12/504	86/11608	0.000321473	0.032533	0.0301169	SENP3/CHD8/TAF4/MEN1/METTL1/TRMT6/CXXC1/SUZ12/PAXIP1/TAF6/RIOK1/MCRS1	12
	5	GO:0035097	histone methyltransferase complex	9/504	57/11608	0.000714535	0.046766	0.0432928	SENP3/CHD8/TAF4/MEN1/CXXC1/SUZ12/PAXIP1/TAF6/MCRS1	9
	5	GO:0055029	nuclear DNA-directed RNA polymerase complex	12/504	95/11608	0.000807222	0.046766	0.0432928	ERCC3/POLR1B/POLR1F/TAF4/POLA2/TAF5/TAF8/TAF6/POLR3GL/MMS19/POLR3G/RTF1	12
	5	GO:0000428	DNA-directed RNA polymerase complex	12/504	96/11608	0.000887089	0.046766	0.0432928	ERCC3/POLR1B/POLR1F/TAF4/POLA2/TAF5/TAF8/TAF6/POLR3GL/MMS19/POLR3G/RTF1	12
	5	GO:0001725	stress fiber	9/504	59/11608	0.000924228	0.046766	0.0432928	MYLK/ZYX/LIMCH1/BAG3/PDLIM7/PTK2/FHOD1/PDLIM5/PDLIM2	9
	5	GO:0097517	contractile actin filament bundle	9/504	59/11608	0.000924228	0.046766	0.0432928	MYLK/ZYX/LIMCH1/BAG3/PDLIM7/PTK2/FHOD1/PDLIM5/PDLIM2	9
	5	GO:0000228	nuclear chromosome	17/504	172/11608	0.00130866	0.0494307	0.0457597	AGO3/SMARCAD1/CHEK1/LRWD1/MORF4L1/ORC3/POLA2/TFPT/DMAP1/MCM10/PBRM1/EP400/SIN3A/ORC2/TRIM24/TOPBP1/MCRS1	17
	6	GO:0001533	cornified envelope	4/36	34/11608	3.38131e-06	0.000273886	0.000266946	SCEL/PKP3/PI3/TGM1	4

## Sheet: Reactome_Pathway
	Cluster	ID	Description	GeneRatio	BgRatio	pvalue	p.adjust	qvalue	geneID	Count
	2	R-HSA-5389840	Mitochondrial translation elongation	14/272	87/7599	2.10157e-06	0.00209106	0.00205733	MRPL41/MRPL55/MRPL50/MRPL28/MRPL51/MRPL16/MRPS33/MRPS24/MRPL46/MRPS26/MRPS6/MRPS21/TSFM/MRPL19	14
	2	R-HSA-5368287	Mitochondrial translation	14/272	93/7599	4.75224e-06	0.00236424	0.0023261	MRPL41/MRPL55/MRPL50/MRPL28/MRPL51/MRPL16/MRPS33/MRPS24/MRPL46/MRPS26/MRPS6/MRPS21/TSFM/MRPL19	14
	2	R-HSA-5368286	Mitochondrial translation initiation	13/272	87/7599	1.13401e-05	0.00282086	0.00277535	MRPL41/MRPL55/MRPL50/MRPL28/MRPL51/MRPL16/MRPS33/MRPS24/MRPL46/MRPS26/MRPS6/MRPS21/MRPL19	13
	2	R-HSA-5419276	Mitochondrial translation termination	13/272	87/7599	1.13401e-05	0.00282086	0.00277535	MRPL41/MRPL55/MRPL50/MRPL28/MRPL51/MRPL16/MRPS33/MRPS24/MRPL46/MRPS26/MRPS6/MRPS21/MRPL19	13
	2	R-HSA-72766	Translation	25/272	287/7599	3.16603e-05	0.00630041	0.00619876	MRPL41/PARS2/MRPL55/MRPL50/MRPL28/DARS2/RPL22L1/MRPL51/EIF2B4/EIF2B3/MRPL16/MRPS33/MRPS24/SARS2/MRPL46/TARS2/MRPS26/SRP19/MRPS6/MRPS21/SRP54/TSFM/MRPL19/CARS1/SRP72	25
	3	R-HSA-73980	RNA Polymerase III Transcription Termination	6/128	23/7599	1.62105e-06	0.000932103	0.000916319	POLR3K/POLR3H/NFIB/POLR1D/POLR3C/NFIX	6
	3	R-HSA-74158	RNA Polymerase III Transcription	6/128	41/7599	5.63223e-05	0.00955798	0.00939613	POLR3K/POLR3H/NFIB/POLR1D/POLR3C/NFIX	6
	3	R-HSA-749476	RNA Polymerase III Abortive And Retractive Initiation	6/128	41/7599	5.63223e-05	0.00955798	0.00939613	POLR3K/POLR3H/NFIB/POLR1D/POLR3C/NFIX	6
	3	R-HSA-5368286	Mitochondrial translation initiation	8/128	87/7599	9.97355e-05	0.00955798	0.00939613	MRPS16/MRPL13/ERAL1/PTCD3/MRPS12/MRPS5/MRPS11/MRPS10	8
	3	R-HSA-5389840	Mitochondrial translation elongation	8/128	87/7599	9.97355e-05	0.00955798	0.00939613	MRPS16/MRPL13/ERAL1/PTCD3/MRPS12/MRPS5/MRPS11/MRPS10	8
	3	R-HSA-5419276	Mitochondrial translation termination	8/128	87/7599	9.97355e-05	0.00955798	0.00939613	MRPS16/MRPL13/ERAL1/PTCD3/MRPS12/MRPS5/MRPS11/MRPS10	8
	3	R-HSA-5368287	Mitochondrial translation	8/128	93/7599	0.000159765	0.0131236	0.0129014	MRPS16/MRPL13/ERAL1/PTCD3/MRPS12/MRPS5/MRPS11/MRPS10	8
	3	R-HSA-73780	RNA Polymerase III Chain Elongation	4/128	18/7599	0.000195718	0.0140672	0.013829	POLR3K/POLR3H/POLR1D/POLR3C	4
	5	R-HSA-429914	Deadenylation-dependent mRNA decay	11/349	55/7599	3.17412e-05	0.030535	0.0301708	PAN2/EIF4A2/CNOT1/PAN3/TTC37/DCP2/XRN1/LSM1/CNOT3/CNOT9/TUT7	11
	5	R-HSA-429947	Deadenylation of mRNA	7/349	24/7599	7.12933e-05	0.0342921	0.0338831	PAN2/EIF4A2/CNOT1/PAN3/CNOT3/CNOT9/TUT7	7
	6	R-HSA-6803157	Antimicrobial peptides	4/24	27/7599	1.27969e-06	7.16627e-05	6.33111e-05	DEFB4A/DEFB4B/PI3/RNASE7	4
	6	R-HSA-6809371	Formation of the cornified envelope	3/24	52/7599	0.000552743	0.0128349	0.0113391	PKP3/PI3/TGM1	3
	6	R-HSA-6805567	Keratinization	3/24	56/7599	0.000687583	0.0128349	0.0113391	PKP3/PI3/TGM1	3

## Sheet: UP Keywords Molecular Function
	cluster	Description	PValue	List.Total	Pop.Hits	Pop.Total	FE	Bonferroni	p.adjust	-log10(p.adj)	FDR	UniProt_id	Genes	Count
	2	KW-0687~Ribonucleoprotein	0.000646331	259	279	7440	2.26512	0.0423934	0.0433042	1.36347	0.0420115	Q9UKV8, Q8N5N7, Q96EL2, Q8IXM3, Q9H2W6, Q96G21, P10155, Q9NX20, O76094, Q9BYN8, P09132, P61011, Q6P5R6, Q4U2R6, Q14493, Q13084, Q9BRJ2, Q9Y291, Q7Z7F7, P82932, P49406, P82921	AGO2,MRPL50,MRPS24,MRPL41,MRPL46,IMP4,RO60,MRPL16,SRP72,MRPS26,SRP19,SRP54,RPL22L1,MRPL51,SLBP,MRPL28,MRPS33,MRPL55,MRPS6,MRPL19,MRPS21	22
	3	KW-0694~RNA-binding	0.000196446	138	634	7440	2.21095	0.0099697	0.0100188	1.99919	0.00962586	Q71RC2, Q92615, Q15434, Q7Z4G4, Q9UPT8, Q96QC0, Q5SY16, Q96E39, Q12926, Q9Y3A4, Q92771, O75616, Q96EY7, Q9UNQ2, Q9H814, Q8IXT5, P38935, Q9NQT5, Q9P2K5, Q99575, Q9Y3B2, Q9Y580, O15523, Q9BRP8, Q15477, P08579	LARP4,LARP4B,RBMS2,TRMT11,ZC3H4,PPP1R10,NOL9,RBMXL1,ELAVL2,RRP7A,ERAL1,PTCD3,DIMT1,PHAX,RBM12B,IGHMBP2,EXOSC3,MYEF2,POP1,EXOSC1,RBM7,DDX3Y,PYM1,SKIV2L,SNRPB2	26
	5	KW-0156~Chromatin regulator	0.000541247	308	281	7440	2.1491	0.0351011	0.0299414	1.52373	0.0299414	Q96EZ8, Q86U86, Q96L91, O95251, Q9UIF9, Q9Y6K1, Q96L73, Q96GM5, Q15022, Q9UBU8, Q9HC52, Q86UE8, Q9Y5T5, Q9H4L7, Q9UFC0, P28370, O00255, Q8N9N5, Q7LBC6, Q8TF76, Q9HCK8, Q92785, Q9NPF5, Q8NHM5, Q14781	MCRS1,PBRM1,EP400,KAT7,BAZ2A,DNMT3A,NSD1,SMARCD1,SUZ12,MORF4L1,CBX8,TLK2,USP16,SMARCAD1,LRWD1,SMARCA1,MEN1,BANP,KDM3B,HASPIN,CHD8,DPF2,DMAP1,KDM2B,CBX2	25
	5	KW-0723~Serine/threonine- protein kinase	0.000907316	308	326	7440	2.00064	0.0581508	0.0299414	1.52373	0.0299414	Q9H2G2, P50750, Q9UHD2, Q9P0L2, P42345, P11274, O60566, Q6P5Z2, O14920, Q86UE8, O14965, P04049, Q8TDX7, O15111, O75116, Q15746, Q13627, Q9BRS2, Q8TF76, O96013, Q9NYV4, P51617, P48730, Q9H4A3, Q13177, O14733, O14757	SLK,CDK9,TBK1,MARK1,MTOR,BCR,BUB1B,PKN3,IKBKB,TLK2,AURKA,RAF1,NEK7,CHUK,ROCK2,MYLK,DYRK1A,RIOK1,HASPIN,PAK4,CDK12,IRAK1,CSNK1D,WNK1,PAK2,MAP2K7,CHEK1	27
	6	KW-0646~Protease inhibitor	0.00116532	26	63	7440	18.1685	0.0343751	0.022758	1.64287	0.0219994	P19957, P20810, P48594, P05120	PI3,CAST,SERPINB4,SERPINB2	4
	6	KW-0720~Serine protease	0.0015172	26	69	7440	16.5886	0.0445287	0.022758	1.64287	0.0219994	O43240, P49862, Q6UWY2, Q92876	KLK10,KLK7,PRSS57,KLK6	4

## Sheet: Pfam
	Cluster	Category	Term	Count	%	PValue	Genes	List Total	Pop Hits	Pop Total	Fold Enrichment	Bonferroni	Benjamini	FDR
	6	Pfam	PF00089:Trypsin	4	10.8108	0.0003797	O43240, P49862, Q6UWY2, Q92876	35	47	11186	27.2	0.0158239	0.0159474	0.0159474

## Sheet: Interpro
	Cluster	Category	Term	Count	%	PValue	Genes	List Total	Pop Hits	Pop Total	Fold Enrichment	Bonferroni	Benjamini	FDR
	6	Interpro	IPR018114:Peptidase S1, trypsin family, active site	4	10.8108	0.000250016	O43240, P49862, Q6UWY2, Q92876	37	40	11610	31.3784	0.0251823	0.0137447	0.0137447
	6	Interpro	IPR001314:Peptidase S1A, chymotrypsin-type	4	10.8108	0.000310304	O43240, P49862, Q6UWY2, Q92876	37	43	11610	29.1892	0.0311601	0.0137447	0.0137447
	6	Interpro	IPR001254:Peptidase S1	4	10.8108	0.000404257	O43240, P49862, Q6UWY2, Q92876	37	47	11610	26.705	0.0404037	0.0137447	0.0137447
	6	Interpro	IPR009003:Trypsin-like cysteine/serine peptidase domain	4	10.8108	0.000609251	O43240, P49862, Q6UWY2, Q92876	37	54	11610	23.2432	0.0602699	0.0155359	0.0155359

## Sheet: Supfam
	Cluster	Category	Term	Count	%	PValue	Genes	List Total	Pop Hits	Pop Total	Fold Enrichment	Bonferroni	Benjamini	FDR
	6	Supfam	SSF50494:Trypsin-like serine proteases	4	10.8108	0.000646103	O43240, P49862, Q6UWY2, Q92876	28	54	8456	22.3704	0.0166637	0.0167987	0.0167987
