# Supplementary material for: DEAD box RNA helicases are pervasive protein kinase interactors and activators
Source: HighWire-hosted journal article supplement (doi:10.1101/gr.278264.123), 2024-06-01
Supplement: Supplemental_Table_S5_.xlsx [file Supplemental_Table_S5_.xlsx]

## Sheet: Description
	Over-representational analysis (ORA) with the GO term ‘Molecular Function’ on all 1,428 DDX/DHX interactors

## Sheet: GO_MolFunc_Statistics_HEK293_up
	GO Molecular Function	In Proteome	In Interactors	Ratio	p-value	p-value corrected
	RNA binding [GO:0003723]	1295	238	0.183784	1.64142e-12	6.29484e-09
	tau-protein kinase activity [GO:0050321]	20	12	0.6	3.29197e-07	0.000631236
	chromatin binding [GO:0003682]	364	72	0.197802	5.94802e-06	0.00760355
	protein kinase binding [GO:0019901]	389	68	0.174807	0.000495283	0.434437
	protein N-terminus binding [GO:0047485]	90	22	0.244444	0.000566411	0.434437
	methylated histone binding [GO:0035064]	65	17	0.261538	0.00102983	0.470984
	transferase activity [GO:0016740]	29	10	0.344828	0.00115255	0.470984
	protein kinase activity [GO:0004672]	170	34	0.2	0.00122549	0.470984
	histone binding [GO:0042393]	145	30	0.206897	0.00131835	0.470984
	protein C-terminus binding [GO:0008022]	171	34	0.19883	0.00136028	0.470984
	DNA-directed 5'-3' RNA polymerase activity [GO:0003899]	35	11	0.314286	0.0015768	0.470984
	histone methyltransferase activity (H3-K27 specific) [GO:0046976]	3	3	1	0.00159656	0.470984
	isocitrate dehydrogenase (NAD+) activity [GO:0004449]	3	3	1	0.00159656	0.470984
	ribonuclease P RNA binding [GO:0033204]	9	5	0.555556	0.00182758	0.482273
	transcription corepressor binding [GO:0001222]	41	12	0.292683	0.00195023	0.482273
	DNA binding [GO:0003677]	725	111	0.153103	0.00201209	0.482273
	microtubule binding [GO:0008017]	212	39	0.183962	0.00282749	0.603316
	protein serine kinase activity [GO:0106310]	296	51	0.172297	0.00308914	0.603316
	rRNA binding [GO:0019843]	38	11	0.289474	0.00326675	0.603316
	armadillo repeat domain binding [GO:0070016]	10	5	0.5	0.00330369	0.603316
	ribonuclease P activity [GO:0004526]	10	5	0.5	0.00330369	0.603316
	actin binding [GO:0003779]	223	40	0.179372	0.00398916	0.695383
	miRNA binding [GO:0035198]	29	9	0.310345	0.00454591	0.747289
	ion transmembrane transporter activity [GO:0015075]	7	4	0.571429	0.00487151	0.747289
	siRNA binding [GO:0035197]	7	4	0.571429	0.00487151	0.747289
	beta-catenin binding [GO:0008013]	69	16	0.231884	0.00528192	0.779083
	histone H3-di/monomethyl-lysine-36 demethylase activity [GO:0140680]	4	3	0.75	0.00582642	0.827568
	tau protein binding [GO:0048156]	41	11	0.268293	0.00616974	0.845033
	RNA polymerase II CTD heptapeptide repeat kinase activity [GO:0008353]	12	5	0.416667	0.00849144	1
	helicase activity [GO:0004386]	32	9	0.28125	0.00921788	1
	DNA-binding transcription factor activity [GO:0003700]	315	51	0.161905	0.0104673	1
	protein serine/threonine kinase activity [GO:0004674]	296	48	0.162162	0.0123093	1
	aldehyde dehydrogenase (NAD+) activity [GO:0004029]	13	5	0.384615	0.0124855	1
	RNA polymerase II complex binding [GO:0000993]	28	8	0.285714	0.0125033	1
	ankyrin repeat binding [GO:0071532]	5	3	0.6	0.0132974	1
	ubiquitin-protein transferase activator activity [GO:0097027]	5	3	0.6	0.0132974	1
	RNA polymerase II C-terminal domain phosphoserine binding [GO:1990269]	5	3	0.6	0.0132974	1
	cysteine-type endopeptidase inhibitor activity [GO:0004869]	18	6	0.333333	0.0135774	1
	cadherin binding involved in cell-cell adhesion [GO:0098641]	18	6	0.333333	0.0135774	1
	endoribonuclease activity, cleaving miRNA-paired mRNA [GO:0090624]	2	2	1	0.0136602	1
	arginase activity [GO:0004053]	2	2	1	0.0136602	1
	CCR6 chemokine receptor binding [GO:0031731]	2	2	1	0.0136602	1
	type 2 metabotropic glutamate receptor binding [GO:0031799]	2	2	1	0.0136602	1
	Rho-dependent protein serine/threonine kinase activity [GO:0072518]	2	2	1	0.0136602	1
	aryl hydrocarbon receptor binding [GO:0017162]	9	4	0.444444	0.0144572	1
	histone H3-methyl-lysine-36 demethylase activity [GO:0051864]	9	4	0.444444	0.0144572	1
	core promoter sequence-specific DNA binding [GO:0001046]	14	5	0.357143	0.0175804	1
	histone acetyltransferase binding [GO:0035035]	19	6	0.315789	0.0179178	1
	small GTPase binding [GO:0031267]	238	39	0.163866	0.0189289	1
	tRNA binding [GO:0000049]	66	14	0.212121	0.0189478	1
	microtubule motor activity [GO:0003777]	42	10	0.238095	0.0206051	1
	dynein light intermediate chain binding [GO:0051959]	15	5	0.333333	0.0238797	1
	phosphatase binding [GO:0019902]	37	9	0.243243	0.0239652	1
	ATP-dependent peptidase activity [GO:0004176]	6	3	0.5	0.0242938	1
	glyceraldehyde-3-phosphate dehydrogenase (NAD+) (non-phosphorylating) activity [GO:0043878]	6	3	0.5	0.0242938	1
	ATP-dependent chromatin remodeler activity [GO:0140658]	32	8	0.25	0.0277652	1
	RNA polymerase II general transcription initiation factor activity [GO:0016251]	32	8	0.25	0.0277652	1
	alpha-tubulin binding [GO:0043014]	32	8	0.25	0.0277652	1
	DNA-binding transcription factor binding [GO:0140297]	137	24	0.175182	0.0280803	1
	transcription cis-regulatory region binding [GO:0000976]	166	28	0.168675	0.029746	1
	protein-macromolecule adaptor activity [GO:0030674]	83	16	0.192771	0.0298293	1
	DNA replication origin binding [GO:0003688]	16	5	0.3125	0.0314656	1
	cyclin-dependent protein serine/threonine kinase activity [GO:0004693]	22	6	0.272727	0.0363451	1
	histone-lysine N-methyltransferase activity [GO:0018024]	22	6	0.272727	0.0363451	1
	RNA polymerase III type 2 promoter sequence-specific DNA binding [GO:0001003]	3	2	0.666667	0.0377874	1
	procollagen-lysine 5-dioxygenase activity [GO:0008475]	3	2	0.666667	0.0377874	1
	RNA polymerase III type 1 promoter sequence-specific DNA binding [GO:0001002]	3	2	0.666667	0.0377874	1
	cytoskeletal protein-membrane anchor activity [GO:0106006]	3	2	0.666667	0.0377874	1
	serine C-palmitoyltransferase activity [GO:0004758]	3	2	0.666667	0.0377874	1
	acetylcholine receptor activator activity [GO:0030549]	3	2	0.666667	0.0377874	1
	TFIIIC-class transcription factor complex binding [GO:0001156]	3	2	0.666667	0.0377874	1
	IkappaB kinase activity [GO:0008384]	3	2	0.666667	0.0377874	1
	POZ domain binding [GO:0031208]	3	2	0.666667	0.0377874	1
	tripeptidyl-peptidase activity [GO:0008240]	3	2	0.666667	0.0377874	1
	gap junction channel activity [GO:0005243]	3	2	0.666667	0.0377874	1
	CCR5 chemokine receptor binding [GO:0031730]	3	2	0.666667	0.0377874	1
	type 3 metabotropic glutamate receptor binding [GO:0031800]	3	2	0.666667	0.0377874	1
	rRNA primary transcript binding [GO:0042134]	3	2	0.666667	0.0377874	1
	tRNA (guanine-N2-)-methyltransferase activity [GO:0004809]	3	2	0.666667	0.0377874	1
	7S RNA binding [GO:0008312]	7	3	0.428571	0.0388604	1
	guanylate kinase activity [GO:0004385]	7	3	0.428571	0.0388604	1
	interleukin-1 receptor binding [GO:0005149]	7	3	0.428571	0.0388604	1
	unmethylated CpG binding [GO:0045322]	7	3	0.428571	0.0388604	1
	promoter-specific chromatin binding [GO:1990841]	53	11	0.207547	0.0404513	1
	gamma-catenin binding [GO:0045295]	12	4	0.333333	0.0426648	1
	nucleic acid binding [GO:0003676]	80	15	0.1875	0.0430504	1
	methyl-CpG binding [GO:0008327]	23	6	0.26087	0.0444593	1
	cyclin binding [GO:0030332]	29	7	0.241379	0.0457277	1
	protein serine/threonine/tyrosine kinase activity [GO:0004712]	346	51	0.147399	0.0495638	1
	protein kinase A regulatory subunit binding [GO:0034237]	24	6	0.25	0.0536157	1
	NF-kappaB binding [GO:0051059]	30	7	0.233333	0.0538429	1
	histone methyltransferase activity [GO:0042054]	13	4	0.307692	0.0560779	1
	protein-membrane adaptor activity [GO:0043495]	13	4	0.307692	0.0560779	1
	leucine zipper domain binding [GO:0043522]	8	3	0.375	0.0568703	1
	myosin II binding [GO:0045159]	8	3	0.375	0.0568703	1
	histone methyltransferase activity (H3-K36 specific) [GO:0046975]	8	3	0.375	0.0568703	1
	phosphatase regulator activity [GO:0019208]	8	3	0.375	0.0568703	1
	cytoskeletal protein binding [GO:0008092]	43	9	0.209302	0.0576493	1
	zinc ion binding [GO:0008270]	592	82	0.138514	0.060237	1
	cytoskeletal motor activity [GO:0003774]	19	5	0.263158	0.0624264	1
	3'-5'-exoribonuclease activity [GO:0000175]	31	7	0.225806	0.0628013	1
	NAD binding [GO:0051287]	31	7	0.225806	0.0628013	1
	single-stranded RNA binding [GO:0003727]	38	8	0.210526	0.0691469	1
	transcription coactivator binding [GO:0001223]	38	8	0.210526	0.0691469	1
	telomeric D-loop binding [GO:0061821]	4	2	0.5	0.0697484	1
	structural constituent of postsynaptic actin cytoskeleton [GO:0098973]	4	2	0.5	0.0697484	1
	carboxy-lyase activity [GO:0016831]	4	2	0.5	0.0697484	1
	G-quadruplex RNA binding [GO:0002151]	4	2	0.5	0.0697484	1
	aminoacyl-tRNA hydrolase activity [GO:0004045]	4	2	0.5	0.0697484	1
	histone serine kinase activity [GO:0035174]	4	2	0.5	0.0697484	1
	mRNA cap binding complex binding [GO:0140262]	4	2	0.5	0.0697484	1
	G protein-coupled serotonin receptor binding [GO:0031821]	4	2	0.5	0.0697484	1
	5'-3' exoribonuclease activity [GO:0004534]	4	2	0.5	0.0697484	1
	aldehyde dehydrogenase [NAD(P)+] activity [GO:0004030]	4	2	0.5	0.0697484	1
	laminin-1 binding [GO:0043237]	4	2	0.5	0.0697484	1
	mediator complex binding [GO:0036033]	4	2	0.5	0.0697484	1
	interleukin-1 binding [GO:0019966]	4	2	0.5	0.0697484	1
	transcription regulator inhibitor activity [GO:0140416]	14	4	0.285714	0.0714768	1
	calcium-dependent protein kinase C activity [GO:0004698]	14	4	0.285714	0.0714768	1
	cAMP response element binding protein binding [GO:0008140]	9	3	0.333333	0.0780769	1
	small ribosomal subunit rRNA binding [GO:0070181]	9	3	0.333333	0.0780769	1
	NAD-retinol dehydrogenase activity [GO:0004745]	9	3	0.333333	0.0780769	1
	protein kinase B binding [GO:0043422]	9	3	0.333333	0.0780769	1
	tropomyosin binding [GO:0005523]	9	3	0.333333	0.0780769	1
	ubiquitin protein ligase activity [GO:0061630]	213	32	0.150235	0.0828652	1
	structural constituent of cytoskeleton [GO:0005200]	81	14	0.17284	0.0864608	1
	protein-containing complex binding [GO:0044877]	252	37	0.146825	0.0865518	1
	mRNA 3'-UTR binding [GO:0003730]	67	12	0.179104	0.0867527	1
	pyridoxal phosphate binding [GO:0030170]	40	8	0.2	0.0885043	1
	cAMP response element binding [GO:0035497]	15	4	0.266667	0.0887849	1
	antigen binding [GO:0003823]	15	4	0.266667	0.0887849	1
	plus-end-directed microtubule motor activity [GO:0008574]	15	4	0.266667	0.0887849	1
	insulin receptor binding [GO:0005158]	21	5	0.238095	0.0899921	1
	single-stranded DNA binding [GO:0003697]	96	16	0.166667	0.0912817	1
	structural constituent of muscle [GO:0008307]	28	6	0.214286	0.100796	1
	muscle alpha-actinin binding [GO:0051371]	10	3	0.3	0.102156	1
	transferrin receptor binding [GO:1990459]	10	3	0.3	0.102156	1
	lysine-acetylated histone binding [GO:0070577]	22	5	0.227273	0.105771	1
	methyltransferase activity [GO:0008168]	35	7	0.2	0.107125	1
	histone H3-di/monomethyl-lysine-9 demethylase activity [GO:0140683]	5	2	0.4	0.107382	1
	protein-arginine omega-N asymmetric methyltransferase activity [GO:0035242]	5	2	0.4	0.107382	1
	serine-type carboxypeptidase activity [GO:0004185]	5	2	0.4	0.107382	1
	telomerase inhibitor activity [GO:0010521]	5	2	0.4	0.107382	1
	cytoskeleton-nuclear membrane anchor activity [GO:0140444]	5	2	0.4	0.107382	1
	sulfatide binding [GO:0120146]	5	2	0.4	0.107382	1
	small molecule binding [GO:0036094]	5	2	0.4	0.107382	1
	protein-arginine omega-N monomethyltransferase activity [GO:0035241]	5	2	0.4	0.107382	1
	coreceptor activity involved in Wnt signaling pathway, planar cell polarity pathway [GO:1904929]	5	2	0.4	0.107382	1
	Y-form DNA binding [GO:0000403]	5	2	0.4	0.107382	1
	pre-miRNA binding [GO:0070883]	5	2	0.4	0.107382	1
	syndecan binding [GO:0045545]	5	2	0.4	0.107382	1
	minus-end-directed microtubule motor activity [GO:0008569]	5	2	0.4	0.107382	1
	lamin binding [GO:0005521]	16	4	0.25	0.107891	1
	cytoskeletal anchor activity [GO:0008093]	16	4	0.25	0.107891	1
	serine-type endopeptidase activity [GO:0004252]	84	14	0.166667	0.108859	1
	gap junction channel activity involved in cell communication by electrical coupling [GO:1903763]	1	1	1	0.116877	1
	U6atac snRNA binding [GO:0030624]	1	1	1	0.116877	1
	leukotriene B4 12-hydroxy dehydrogenase activity [GO:0097257]	1	1	1	0.116877	1
	2-alkenal reductase (NADP+) activity [GO:0035798]	1	1	1	0.116877	1
	gap junction channel activity involved in cardiac conduction electrical coupling [GO:0086075]	1	1	1	0.116877	1
	glucosidase activity [GO:0015926]	1	1	1	0.116877	1
	Glc3Man9GlcNAc2 oligosaccharide glucosidase activity [GO:0004573]	1	1	1	0.116877	1
	13-lipoxin reductase activity [GO:0036185]	1	1	1	0.116877	1
	prostaglandin-E2 9-reductase activity [GO:0050221]	1	1	1	0.116877	1
	netrin receptor binding [GO:1990890]	1	1	1	0.116877	1
	kinetochore adaptor activity [GO:0140483]	1	1	1	0.116877	1
	2-hydroxy-3-methylhexadecanoyl-CoA lyase activity [GO:0106360]	1	1	1	0.116877	1
	15-hydroxyprostaglandin dehydrogenase (NADP+) activity [GO:0047021]	1	1	1	0.116877	1
	carbon-carbon lyase activity [GO:0016830]	1	1	1	0.116877	1
	2-hydroxyphytanoyl-CoA lyase activity [GO:0106376]	1	1	1	0.116877	1
	UTP:glucose-1-phosphate uridylyltransferase activity [GO:0003983]	1	1	1	0.116877	1
	proline dipeptidase activity [GO:0102009]	1	1	1	0.116877	1
	aspartate-tRNA(Asn) ligase activity [GO:0050560]	1	1	1	0.116877	1
	hydroxymethylbilane synthase activity [GO:0004418]	1	1	1	0.116877	1
	uridylyltransferase activity [GO:0070569]	1	1	1	0.116877	1
	tRNA (N(6)-L-threonylcarbamoyladenosine(37)-C(2))-methylthiotransferase [GO:0061712]	1	1	1	0.116877	1
	N6-threonylcarbomyladenosine methylthiotransferase activity [GO:0035598]	1	1	1	0.116877	1
	Atg12 transferase activity [GO:0019777]	1	1	1	0.116877	1
	Atg8 ligase activity [GO:0019776]	1	1	1	0.116877	1
	mycophenolic acid acyl-glucuronide esterase activity [GO:0102390]	1	1	1	0.116877	1
	G-rich single-stranded DNA binding [GO:1990955]	1	1	1	0.116877	1
	methionine adenosyltransferase regulator activity [GO:0048270]	1	1	1	0.116877	1
	3-oxo-lignoceronyl-CoA synthase activity [GO:0102338]	1	1	1	0.116877	1
	pyrimidine ribonucleotide binding [GO:0032557]	1	1	1	0.116877	1
	phosphoribosylformylglycinamidine synthase activity [GO:0004642]	1	1	1	0.116877	1
	phosphoenolpyruvate carboxykinase activity [GO:0004611]	1	1	1	0.116877	1
	dihydrolipoyllysine-residue (2-methylpropanoyl)transferase activity [GO:0043754]	1	1	1	0.116877	1
	lipoic acid binding [GO:0031405]	1	1	1	0.116877	1
	myosin light chain kinase activity [GO:0004687]	1	1	1	0.116877	1
	tRNA (guanine-N7-)-methyltransferase activity [GO:0008176]	1	1	1	0.116877	1
	steroid delta-isomerase activity [GO:0004769]	1	1	1	0.116877	1
	histone deacetylase inhibitor activity [GO:0046811]	1	1	1	0.116877	1
	SUMO activating enzyme activity [GO:0019948]	1	1	1	0.116877	1
	N-acetylglucosamine kinase activity [GO:0045127]	1	1	1	0.116877	1
	gap junction hemi-channel activity [GO:0055077]	1	1	1	0.116877	1
	C-8 sterol isomerase activity [GO:0000247]	1	1	1	0.116877	1
	cholestenol delta-isomerase activity [GO:0047750]	1	1	1	0.116877	1
	apolipoprotein receptor activity [GO:0030226]	1	1	1	0.116877	1
	ribonuclease E activity [GO:0008995]	1	1	1	0.116877	1
	L-cysteine desulfhydrase activity [GO:0080146]	1	1	1	0.116877	1
	L-cystine L-cysteine-lyase (deaminating) [GO:0044540]	1	1	1	0.116877	1
	UFM1 conjugating enzyme activity [GO:0061657]	1	1	1	0.116877	1
	mannose-1-phosphate guanylyltransferase activity [GO:0004475]	1	1	1	0.116877	1
	sulfide:quinone oxidoreductase activity [GO:0070224]	1	1	1	0.116877	1
	arachidonate 15-lipoxygenase activity [GO:0050473]	1	1	1	0.116877	1
	linoleate 13S-lipoxygenase activity [GO:0016165]	1	1	1	0.116877	1
	peroxisome matrix targeting signal-1 binding [GO:0005052]	1	1	1	0.116877	1
	gap junction channel activity involved in AV node cell-bundle of His cell electrical coupling [GO:0086077]	1	1	1	0.116877	1
	gap junction channel activity involved in SA node cell-atrial cardiac muscle cell electrical coupling [GO:0086020]	1	1	1	0.116877	1
	L-aminoadipate-semialdehyde dehydrogenase activity [GO:0004043]	1	1	1	0.116877	1
	mono-ADP-D-ribose binding [GO:0072571]	1	1	1	0.116877	1
	betaine-aldehyde dehydrogenase activity [GO:0008802]	1	1	1	0.116877	1
	polymeric immunoglobulin receptor activity [GO:0001792]	1	1	1	0.116877	1
	calcium-dependent cysteine-type endopeptidase inhibitor activity [GO:0010859]	1	1	1	0.116877	1
	dopamine receptor binding [GO:0050780]	1	1	1	0.116877	1
	lysozyme activity [GO:0003796]	1	1	1	0.116877	1
	ammonia-lyase activity [GO:0016841]	1	1	1	0.116877	1
	histidine ammonia-lyase activity [GO:0004397]	1	1	1	0.116877	1
	L-serine-phosphatidylcholine phosphatidyltransferase activity [GO:0106258]	1	1	1	0.116877	1
	glutamate-cysteine ligase catalytic subunit binding [GO:0035226]	1	1	1	0.116877	1
	sodium-dependent multivitamin transmembrane transporter activity [GO:0008523]	1	1	1	0.116877	1
	cystathionine gamma-lyase activity [GO:0004123]	1	1	1	0.116877	1
	type 2A serotonin receptor binding [GO:0031826]	1	1	1	0.116877	1
	pantothenate transmembrane transporter activity [GO:0015233]	1	1	1	0.116877	1
	18S rRNA aminocarboxypropyltransferase activity [GO:0106388]	1	1	1	0.116877	1
	CD40 receptor binding [GO:0005174]	1	1	1	0.116877	1
	peptidyl-aspartic acid 3-dioxygenase activity [GO:0062101]	1	1	1	0.116877	1
	pyrimidine-nucleoside phosphorylase activity [GO:0016154]	1	1	1	0.116877	1
	nicotinate phosphoribosyltransferase activity [GO:0004516]	1	1	1	0.116877	1
	alpha-2 macroglobulin receptor activity [GO:0016964]	1	1	1	0.116877	1
	ferrochelatase activity [GO:0004325]	1	1	1	0.116877	1
	RNA lariat debranching enzyme activity [GO:0008419]	1	1	1	0.116877	1
	mevalonate kinase activity [GO:0004496]	1	1	1	0.116877	1
	glycine dehydrogenase (decarboxylating) activity [GO:0004375]	1	1	1	0.116877	1
	sphingolipid activator protein activity [GO:0030290]	1	1	1	0.116877	1
	pyridoxal binding [GO:0070280]	1	1	1	0.116877	1
	endoribonuclease activity, cleaving siRNA-paired mRNA [GO:0070551]	1	1	1	0.116877	1
	18S rRNA (adenine(1779)-N(6)/adenine(1780)-N(6))-dimethyltransferase activity [GO:0052909]	1	1	1	0.116877	1
	enterobactin binding [GO:1903981]	1	1	1	0.116877	1
	methylarsonate reductase activity [GO:0050610]	1	1	1	0.116877	1
	glutathione dehydrogenase (ascorbate) activity [GO:0045174]	1	1	1	0.116877	1
	alpha-1B adrenergic receptor binding [GO:0031692]	1	1	1	0.116877	1
	myosin II head/neck binding [GO:0032034]	1	1	1	0.116877	1
	heparanase activity [GO:0030305]	1	1	1	0.116877	1
	follicle-stimulating hormone receptor binding [GO:0031762]	1	1	1	0.116877	1
	platelet activating factor receptor binding [GO:0031859]	1	1	1	0.116877	1
	oxoglutarate dehydrogenase (NAD+) activity [GO:0034602]	1	1	1	0.116877	1
	molybdopterin molybdotransferase activity [GO:0061599]	1	1	1	0.116877	1
	alpha-1A adrenergic receptor binding [GO:0031691]	1	1	1	0.116877	1
	peptide deformylase activity [GO:0042586]	1	1	1	0.116877	1
	protein-RNA adaptor activity [GO:0140517]	1	1	1	0.116877	1
	procollagen glucosyltransferase activity [GO:0033823]	1	1	1	0.116877	1
	interleukin-4 receptor binding [GO:0005136]	1	1	1	0.116877	1
	myosin VI light chain binding [GO:0070856]	1	1	1	0.116877	1
	dCTP diphosphatase activity [GO:0047840]	1	1	1	0.116877	1
	calcium:proton antiporter activity [GO:0015369]	1	1	1	0.116877	1
	Atg12 activating enzyme activity [GO:0019778]	1	1	1	0.116877	1
	polyribonucleotide nucleotidyltransferase activity [GO:0004654]	1	1	1	0.116877	1
	Atg8 activating enzyme activity [GO:0019779]	1	1	1	0.116877	1
	second spliceosomal transesterification activity [GO:0000386]	1	1	1	0.116877	1
	pumilio-response element binding [GO:0062104]	1	1	1	0.116877	1
	tRNA uridine(34) acetyltransferase activity [GO:0106261]	1	1	1	0.116877	1
	gamma-glutamyl-peptidase activity [GO:0034722]	1	1	1	0.116877	1
	phosphoacetylglucosamine mutase activity [GO:0004610]	1	1	1	0.116877	1
	phenylacetaldehyde dehydrogenase activity [GO:0008957]	1	1	1	0.116877	1
	nitroglycerin reductase activity [GO:0018547]	1	1	1	0.116877	1
	GDP-mannose 4,6-dehydratase activity [GO:0008446]	1	1	1	0.116877	1
	FMN adenylyltransferase activity [GO:0003919]	1	1	1	0.116877	1
	molybdopterin adenylyltransferase activity [GO:0061598]	1	1	1	0.116877	1
	sphinganine-1-phosphate aldolase activity [GO:0008117]	1	1	1	0.116877	1
	1-alkylglycerophosphocholine O-acyltransferase activity [GO:0047191]	1	1	1	0.116877	1
	C5L2 anaphylatoxin chemotactic receptor binding [GO:0031715]	1	1	1	0.116877	1
	pyrimidine deoxyribonucleotide binding [GO:0032556]	1	1	1	0.116877	1
	uniporter activity [GO:0015292]	1	1	1	0.116877	1
	(S)-2-hydroxy-acid oxidase activity [GO:0003973]	1	1	1	0.116877	1
	2-hydroxyglutarate dehydrogenase activity [GO:0047545]	1	1	1	0.116877	1
	exoribonuclease activity, producing 5'-phosphomonoesters [GO:0016896]	1	1	1	0.116877	1
	5'-deoxynucleotidase activity [GO:0002953]	1	1	1	0.116877	1
	deoxyribonuclease inhibitor activity [GO:0060703]	1	1	1	0.116877	1
	phosphoamidase activity [GO:0050187]	1	1	1	0.116877	1
	RNA-3'-phosphate cyclase activity [GO:0003963]	1	1	1	0.116877	1
	mRNA CDS binding [GO:1990715]	1	1	1	0.116877	1
	uroporphyrinogen decarboxylase activity [GO:0004853]	1	1	1	0.116877	1
	RNA polymerase I general transcription initiation factor binding [GO:0001179]	1	1	1	0.116877	1
	N6-isopentenyladenosine methylthiotransferase activity [GO:0035597]	1	1	1	0.116877	1
	raffinose alpha-galactosidase activity [GO:0052692]	1	1	1	0.116877	1
	histone methyltransferase activity (H3-R2 specific) [GO:0070611]	1	1	1	0.116877	1
	histone methyltransferase activity (H2A-R3 specific) [GO:0070612]	1	1	1	0.116877	1
	galactosylgalactosylglucosylceramidase activity [GO:0017041]	1	1	1	0.116877	1
	galactosylxylosylprotein 3-beta-galactosyltransferase activity [GO:0047220]	1	1	1	0.116877	1
	basal RNA polymerase II transcription machinery binding [GO:0001099]	1	1	1	0.116877	1
	N-terminal protein N-methyltransferase activity [GO:0071885]	1	1	1	0.116877	1
	rRNA (adenine) methyltransferase activity [GO:0016433]	1	1	1	0.116877	1
	erythropoietin receptor binding [GO:0005128]	1	1	1	0.116877	1
	interleukin-3 receptor binding [GO:0005135]	1	1	1	0.116877	1
	glycine C-acetyltransferase activity [GO:0008890]	1	1	1	0.116877	1
	ABC-type manganese transporter activity [GO:0015410]	1	1	1	0.116877	1
	cob(I)yrinic acid a,c-diamide adenosyltransferase activity [GO:0008817]	1	1	1	0.116877	1
	tRNA-5-taurinomethyluridine 2-sulfurtransferase [GO:0061708]	1	1	1	0.116877	1
	estrogen receptor binding [GO:0030331]	36	7	0.194444	0.12028	1
	cysteine-type peptidase activity [GO:0008234]	23	5	0.217391	0.122802	1
	poly(U) RNA binding [GO:0008266]	23	5	0.217391	0.122802	1
	snoRNA binding [GO:0030515]	17	4	0.235294	0.128659	1
	transmembrane receptor protein tyrosine phosphatase activity [GO:0005001]	11	3	0.272727	0.128736	1
	DNA binding, bending [GO:0008301]	11	3	0.272727	0.128736	1
	adenyl-nucleotide exchange factor activity [GO:0000774]	11	3	0.272727	0.128736	1
	ubiquitin protein ligase binding [GO:0031625]	254	36	0.141732	0.129297	1
	double-stranded RNA binding [GO:0003725]	65	11	0.169231	0.132716	1
	calmodulin binding [GO:0005516]	147	22	0.14966	0.134856	1
	protein heterodimerization activity [GO:0046982]	224	32	0.142857	0.135236	1
	ubiquitin-protein transferase activity [GO:0004842]	172	25	0.145349	0.148582	1
	structural constituent of skin epidermis [GO:0030280]	6	2	0.333333	0.148927	1
	ATP-dependent DNA/DNA annealing activity [GO:0036310]	6	2	0.333333	0.148927	1
	chromo shadow domain binding [GO:0070087]	6	2	0.333333	0.148927	1
	beta-2 adrenergic receptor binding [GO:0031698]	6	2	0.333333	0.148927	1
	immunoglobulin receptor binding [GO:0034987]	6	2	0.333333	0.148927	1
	thiamine pyrophosphate binding [GO:0030976]	6	2	0.333333	0.148927	1
	RNA polymerase III type 3 promoter sequence-specific DNA binding [GO:0001006]	6	2	0.333333	0.148927	1
	dynein light chain binding [GO:0045503]	6	2	0.333333	0.148927	1
	centromeric DNA binding [GO:0019237]	6	2	0.333333	0.148927	1
	RNA polymerase II general transcription initiation factor binding [GO:0001091]	6	2	0.333333	0.148927	1
	mitogen-activated protein kinase kinase binding [GO:0031434]	6	2	0.333333	0.148927	1
	U2 snRNA binding [GO:0030620]	6	2	0.333333	0.148927	1
	histone demethylase activity [GO:0032452]	18	4	0.222222	0.150928	1
	proline-rich region binding [GO:0070064]	18	4	0.222222	0.150928	1
	nuclear import signal receptor activity [GO:0061608]	18	4	0.222222	0.150928	1
	dynein intermediate chain binding [GO:0045505]	18	4	0.222222	0.150928	1
	dynein complex binding [GO:0070840]	18	4	0.222222	0.150928	1
	mRNA binding [GO:0003729]	188	27	0.143617	0.152096	1
	protein phosphatase 2A binding [GO:0051721]	25	5	0.2	0.160303	1
	sequence-specific DNA binding [GO:0043565]	174	25	0.143678	0.162381	1
	protein serine/threonine kinase activator activity [GO:0043539]	32	6	0.1875	0.163843	1
	nucleotide binding [GO:0000166]	54	9	0.166667	0.174205	1
	phosphoprotein binding [GO:0051219]	33	6	0.181818	0.181747	1
	ubiquitin binding [GO:0043130]	92	14	0.152174	0.183655	1
	RNA polymerase II-specific DNA-binding transcription factor binding [GO:0061629]	138	20	0.144928	0.183788	1
	ribosomal large subunit binding [GO:0043023]	13	3	0.230769	0.187832	1
	C2H2 zinc finger domain binding [GO:0070742]	13	3	0.230769	0.187832	1
	pseudouridine synthase activity [GO:0009982]	13	3	0.230769	0.187832	1
	cAMP-dependent protein kinase activity [GO:0004691]	7	2	0.285714	0.192953	1
	DEAD/H-box RNA helicase binding [GO:0017151]	7	2	0.285714	0.192953	1
	ligase activity [GO:0016874]	7	2	0.285714	0.192953	1
	U1 snRNA binding [GO:0030619]	7	2	0.285714	0.192953	1
	natural killer cell lectin-like receptor binding [GO:0046703]	7	2	0.285714	0.192953	1
	double-stranded telomeric DNA binding [GO:0003691]	7	2	0.285714	0.192953	1
	clathrin light chain binding [GO:0032051]	7	2	0.285714	0.192953	1
	phosphatase activator activity [GO:0019211]	7	2	0.285714	0.192953	1
	protein serine/threonine kinase inhibitor activity [GO:0030291]	7	2	0.285714	0.192953	1
	lysophosphatidic acid binding [GO:0035727]	7	2	0.285714	0.192953	1
	carbonyl reductase (NADPH) activity [GO:0004090]	7	2	0.285714	0.192953	1
	histone methyltransferase activity (H4-K20 specific) [GO:0042799]	7	2	0.285714	0.192953	1
	poly(A) binding [GO:0008143]	20	4	0.2	0.199279	1
	beta-tubulin binding [GO:0048487]	34	6	0.176471	0.200382	1
	sequence-specific double-stranded DNA binding [GO:1990837]	363	48	0.132231	0.201673	1
	RNA polymerase II cis-regulatory region sequence-specific DNA binding [GO:0000978]	780	99	0.126923	0.205418	1
	p53 binding [GO:0002039]	64	10	0.15625	0.210124	1
	cysteine-type endopeptidase activity [GO:0004197]	64	10	0.15625	0.210124	1
	carboxypeptidase activity [GO:0004180]	14	3	0.214286	0.219565	1
	cyclosporin A binding [GO:0016018]	14	3	0.214286	0.219565	1
	acidic amino acid transmembrane transporter activity [GO:0015172]	2	1	0.5	0.220093	1
	3'(2'),5'-bisphosphate nucleotidase activity [GO:0008441]	2	1	0.5	0.220093	1
	coproporphyrinogen oxidase activity [GO:0004109]	2	1	0.5	0.220093	1
	neurotransmitter binding [GO:0042165]	2	1	0.5	0.220093	1
	6-phosphogluconolactonase activity [GO:0017057]	2	1	0.5	0.220093	1
	DNA end binding [GO:0045027]	2	1	0.5	0.220093	1
	vitamin transmembrane transporter activity [GO:0090482]	2	1	0.5	0.220093	1
	mRNA cap binding [GO:0098808]	2	1	0.5	0.220093	1
	JUN kinase kinase activity [GO:0008545]	2	1	0.5	0.220093	1
	chemokine binding [GO:0019956]	2	1	0.5	0.220093	1
	pyrimidine nucleotide binding [GO:0019103]	2	1	0.5	0.220093	1
	dopamine beta-monooxygenase activity [GO:0004500]	2	1	0.5	0.220093	1
	ion channel activity [GO:0005216]	2	1	0.5	0.220093	1
	alcohol dehydrogenase (NADP+) activity [GO:0008106]	2	1	0.5	0.220093	1
	5'-3' RNA helicase activity [GO:0032574]	2	1	0.5	0.220093	1
	phosphoenolpyruvate carboxykinase (GTP) activity [GO:0004613]	2	1	0.5	0.220093	1
	lipoprotein particle receptor binding [GO:0070325]	2	1	0.5	0.220093	1
	chemokine receptor binding [GO:0042379]	2	1	0.5	0.220093	1
	aspartate-tRNA ligase activity [GO:0004815]	2	1	0.5	0.220093	1
	glycogen synthase activity, transferring glucose-1-phosphate [GO:0061547]	2	1	0.5	0.220093	1
	calcitonin gene-related peptide receptor activity [GO:0001635]	2	1	0.5	0.220093	1
	benzodiazepine receptor binding [GO:0030156]	2	1	0.5	0.220093	1
	snRNP binding [GO:0070990]	2	1	0.5	0.220093	1
	proline-tRNA ligase activity [GO:0004827]	2	1	0.5	0.220093	1
	beta-glucuronidase activity [GO:0004566]	2	1	0.5	0.220093	1
	15-hydroxyprostaglandin-D dehydrogenase (NADP+) activity [GO:0047020]	2	1	0.5	0.220093	1
	peroxisome membrane targeting sequence binding [GO:0033328]	2	1	0.5	0.220093	1
	double-stranded DNA helicase activity [GO:0036121]	2	1	0.5	0.220093	1
	gamma-aminobutyric acid transmembrane transporter activity [GO:0015185]	2	1	0.5	0.220093	1
	DNA topoisomerase activity [GO:0003916]	2	1	0.5	0.220093	1
	glycosphingolipid binding [GO:0043208]	2	1	0.5	0.220093	1
	histamine receptor activity [GO:0004969]	2	1	0.5	0.220093	1
	alpha-galactosidase activity [GO:0004557]	2	1	0.5	0.220093	1
	syntaxin-3 binding [GO:0030348]	2	1	0.5	0.220093	1
	Edg-2 lysophosphatidic acid receptor binding [GO:0031755]	2	1	0.5	0.220093	1
	Toll-like receptor 4 binding [GO:0035662]	2	1	0.5	0.220093	1
	histone kinase activity (H3-T11 specific) [GO:0035402]	2	1	0.5	0.220093	1
	NACHT domain binding [GO:0032089]	2	1	0.5	0.220093	1
	alkaline phosphatase activity [GO:0004035]	2	1	0.5	0.220093	1
	NADP+ binding [GO:0070401]	2	1	0.5	0.220093	1
	L-alanine:2-oxoglutarate aminotransferase activity [GO:0004021]	2	1	0.5	0.220093	1
	valine-tRNA ligase activity [GO:0004832]	2	1	0.5	0.220093	1
	sumo-dependent protein binding [GO:0140037]	2	1	0.5	0.220093	1
	IMP dehydrogenase activity [GO:0003938]	2	1	0.5	0.220093	1
	biliberdin reductase NAD+ activity [GO:0106276]	2	1	0.5	0.220093	1
	UFM1 transferase activity [GO:0071568]	2	1	0.5	0.220093	1
	general transcription initiation factor activity [GO:0140223]	2	1	0.5	0.220093	1
	biliverdin reductase (NAD(P)+) activity [GO:0004074]	2	1	0.5	0.220093	1
	biliverdin reductase (NADP+) activity [GO:0106277]	2	1	0.5	0.220093	1
	IgG binding [GO:0019864]	2	1	0.5	0.220093	1
	P-type calcium transporter activity involved in regulation of presynaptic cytosolic calcium ion concentration [GO:1905056]	2	1	0.5	0.220093	1
	pyridoxal phosphatase activity [GO:0033883]	2	1	0.5	0.220093	1
	cation binding [GO:0043169]	2	1	0.5	0.220093	1
	formyltetrahydrofolate dehydrogenase activity [GO:0016155]	2	1	0.5	0.220093	1
	heme oxygenase (decyclizing) activity [GO:0004392]	2	1	0.5	0.220093	1
	calcium-dependent phospholipase C activity [GO:0050429]	2	1	0.5	0.220093	1
	arachidonate 8(S)-lipoxygenase activity [GO:0036403]	2	1	0.5	0.220093	1
	TFIIF-class transcription factor complex binding [GO:0001096]	2	1	0.5	0.220093	1
	hydroxymethyl-, formyl- and related transferase activity [GO:0016742]	2	1	0.5	0.220093	1
	RNA polymerase I core binding [GO:0001042]	2	1	0.5	0.220093	1
	1,4-alpha-oligoglucan phosphorylase activity [GO:0004645]	2	1	0.5	0.220093	1
	carbon-sulfur lyase activity [GO:0016846]	2	1	0.5	0.220093	1
	chondroitin sulfate proteoglycan binding [GO:0035373]	2	1	0.5	0.220093	1
	thymidine phosphorylase activity [GO:0009032]	2	1	0.5	0.220093	1
	angiotensin receptor binding [GO:0031701]	2	1	0.5	0.220093	1
	phosphoethanolamine phosphatase activity [GO:0052732]	2	1	0.5	0.220093	1
	EH domain binding [GO:1990175]	2	1	0.5	0.220093	1
	3-methyl-2-oxobutanoate dehydrogenase (2-methylpropanoyl-transferring) activity [GO:0003863]	2	1	0.5	0.220093	1
	cGMP-inhibited cyclic-nucleotide phosphodiesterase activity [GO:0004119]	2	1	0.5	0.220093	1
	ATPase regulator activity [GO:0060590]	2	1	0.5	0.220093	1
	inositol phosphate phosphatase activity [GO:0052745]	2	1	0.5	0.220093	1
	steroid receptor RNA activator RNA binding [GO:0002153]	2	1	0.5	0.220093	1
	[pyruvate dehydrogenase (lipoamide)] phosphatase activity [GO:0004741]	2	1	0.5	0.220093	1
	RNA polymerase core enzyme binding [GO:0043175]	2	1	0.5	0.220093	1
	transcription regulatory region nucleic acid binding [GO:0001067]	2	1	0.5	0.220093	1
	poly-ADP-D-ribose binding [GO:0072572]	2	1	0.5	0.220093	1
	3-oxo-arachidoyl-CoA synthase activity [GO:0102336]	2	1	0.5	0.220093	1
	cysteine-tRNA ligase activity [GO:0004817]	2	1	0.5	0.220093	1
	serine-tRNA ligase activity [GO:0004828]	2	1	0.5	0.220093	1
	selenide, water dikinase activity [GO:0004756]	2	1	0.5	0.220093	1
	voltage-gated calcium channel activity involved in positive regulation of presynaptic cytosolic calcium levels [GO:0099635]	2	1	0.5	0.220093	1
	protein histidine phosphatase activity [GO:0101006]	2	1	0.5	0.220093	1
	ErbB-2 class receptor binding [GO:0005176]	2	1	0.5	0.220093	1
	FBXO family protein binding [GO:0098770]	2	1	0.5	0.220093	1
	histone kinase activity (H3-T3 specific) [GO:0072354]	2	1	0.5	0.220093	1
	mRNA (nucleoside-2'-O-)-methyltransferase activity [GO:0004483]	2	1	0.5	0.220093	1
	ribonuclease III activity [GO:0004525]	2	1	0.5	0.220093	1
	transmembrane protein dislocase activity [GO:0140567]	2	1	0.5	0.220093	1
	acetylcholine receptor inhibitor activity [GO:0030550]	2	1	0.5	0.220093	1
	polynucleotide 5'-hydroxyl-kinase activity [GO:0051731]	2	1	0.5	0.220093	1
	guanylyltransferase activity [GO:0070568]	2	1	0.5	0.220093	1
	[acetyl-CoA carboxylase] kinase activity [GO:0050405]	2	1	0.5	0.220093	1
	[hydroxymethylglutaryl-CoA reductase (NADPH)] kinase activity [GO:0047322]	2	1	0.5	0.220093	1
	hydroxymethylglutaryl-CoA synthase activity [GO:0004421]	2	1	0.5	0.220093	1
	histone pre-mRNA stem-loop binding [GO:0071207]	2	1	0.5	0.220093	1
	calcium-independent protein kinase C activity [GO:0004699]	2	1	0.5	0.220093	1
	mRNA N6-methyladenosine dioxygenase activity [GO:1990931]	2	1	0.5	0.220093	1
	poly(ADP-ribose) glycohydrolase activity [GO:0004649]	2	1	0.5	0.220093	1
	3-oxo-cerotoyl-CoA synthase activity [GO:0102337]	2	1	0.5	0.220093	1
	1-alkenylglycerophosphocholine O-acyltransferase activity [GO:0047159]	2	1	0.5	0.220093	1
	plasmalogen synthase activity [GO:0050200]	2	1	0.5	0.220093	1
	glutamate-cysteine ligase activity [GO:0004357]	2	1	0.5	0.220093	1
	sphingolipid binding [GO:0046625]	2	1	0.5	0.220093	1
	linoleate 9S-lipoxygenase activity [GO:1990136]	2	1	0.5	0.220093	1
	methylcrotonoyl-CoA carboxylase activity [GO:0004485]	2	1	0.5	0.220093	1
	U12 snRNA binding [GO:0030626]	2	1	0.5	0.220093	1
	protein-cysteine methyltransferase activity [GO:0106363]	2	1	0.5	0.220093	1
	H3K9me3 modified histone binding [GO:0062072]	2	1	0.5	0.220093	1
	cation transmembrane transporter activity [GO:0008324]	2	1	0.5	0.220093	1
	L-serine-phosphatidylethanolamine phosphatidyltransferase activity [GO:0106245]	2	1	0.5	0.220093	1
	plus-end directed microfilament motor activity [GO:0060002]	2	1	0.5	0.220093	1
	double-stranded RNA adenosine deaminase activity [GO:0003726]	2	1	0.5	0.220093	1
	queuine tRNA-ribosyltransferase activity [GO:0008479]	2	1	0.5	0.220093	1
	linear polyubiquitin binding [GO:1990450]	2	1	0.5	0.220093	1
	BRE binding [GO:0042835]	2	1	0.5	0.220093	1
	sphingomyelin transfer activity [GO:0140338]	2	1	0.5	0.220093	1
	N(6)-L-threonylcarbamoyladenine synthase activity [GO:0061711]	2	1	0.5	0.220093	1
	dihydropyrimidinase activity [GO:0004157]	2	1	0.5	0.220093	1
	rRNA (adenine-N6-)-methyltransferase activity [GO:0008988]	2	1	0.5	0.220093	1
	FHA domain binding [GO:0070975]	2	1	0.5	0.220093	1
	ubiquitin-protein transferase inhibitor activity [GO:0055105]	2	1	0.5	0.220093	1
	cadherin binding [GO:0045296]	286	38	0.132867	0.22359	1
	histone acetyltransferase activity [GO:0004402]	21	4	0.190476	0.224994	1
	nuclear localization sequence binding [GO:0008139]	21	4	0.190476	0.224994	1
	actin filament binding [GO:0051015]	175	24	0.137143	0.232207	1
	actinin binding [GO:0042805]	8	2	0.25	0.238314	1
	5'-3' DNA helicase activity [GO:0043139]	8	2	0.25	0.238314	1
	ubiquitin-like protein transferase activity [GO:0019787]	8	2	0.25	0.238314	1
	translation activator activity [GO:0008494]	8	2	0.25	0.238314	1
	histone methyltransferase activity (H3-K9 specific) [GO:0046974]	8	2	0.25	0.238314	1
	primary miRNA binding [GO:0070878]	8	2	0.25	0.238314	1
	AP-2 adaptor complex binding [GO:0035612]	8	2	0.25	0.238314	1
	alpha-catenin binding [GO:0045294]	8	2	0.25	0.238314	1
	L-aspartate transmembrane transporter activity [GO:0015183]	8	2	0.25	0.238314	1
	poly(G) binding [GO:0034046]	8	2	0.25	0.238314	1
	L-glutamate transmembrane transporter activity [GO:0005313]	8	2	0.25	0.238314	1
	dynein heavy chain binding [GO:0045504]	8	2	0.25	0.238314	1
	calcium channel inhibitor activity [GO:0019855]	8	2	0.25	0.238314	1
	growth factor receptor binding [GO:0070851]	8	2	0.25	0.238314	1
	protein-arginine N-methyltransferase activity [GO:0016274]	8	2	0.25	0.238314	1
	polyubiquitin modification-dependent protein binding [GO:0031593]	29	5	0.172414	0.246322	1
	endopeptidase inhibitor activity [GO:0004866]	29	5	0.172414	0.246322	1
	gamma-tubulin binding [GO:0043015]	29	5	0.172414	0.246322	1
	extracellular matrix structural constituent [GO:0005201]	59	9	0.152542	0.248177	1
	cell adhesion molecule binding [GO:0050839]	44	7	0.159091	0.250493	1
	telomerase RNA binding [GO:0070034]	22	4	0.181818	0.251488	1
	nucleosome binding [GO:0031491]	22	4	0.181818	0.251488	1
	phosphatidylinositol-5-phosphate binding [GO:0010314]	15	3	0.2	0.25226	1
	protein phosphatase binding [GO:0019903]	75	11	0.146667	0.257382	1
	syntaxin binding [GO:0019905]	45	7	0.155556	0.269185	1
	DNA-binding transcription repressor activity, RNA polymerase II-specific [GO:0001227]	236	31	0.131356	0.271659	1
	nuclear receptor binding [GO:0016922]	38	6	0.157895	0.28076	1
	calcium-dependent cysteine-type endopeptidase activity [GO:0004198]	9	2	0.222222	0.284096	1
	RAGE receptor binding [GO:0050786]	9	2	0.222222	0.284096	1
	poly(A)-specific ribonuclease activity [GO:0004535]	9	2	0.222222	0.284096	1
	aminoacyl-tRNA editing activity [GO:0002161]	9	2	0.222222	0.284096	1
	retromer complex binding [GO:1905394]	9	2	0.222222	0.284096	1
	identical protein binding [GO:0042802]	1242	152	0.122383	0.285157	1
	RNA polymerase binding [GO:0070063]	16	3	0.1875	0.285576	1
	G-protein beta/gamma-subunit complex binding [GO:0031683]	16	3	0.1875	0.285576	1
	Lys48-specific deubiquitinase activity [GO:1990380]	16	3	0.1875	0.285576	1
	clathrin adaptor activity [GO:0035615]	16	3	0.1875	0.285576	1
	chemoattractant activity [GO:0042056]	16	3	0.1875	0.285576	1
	carboxylic ester hydrolase activity [GO:0052689]	16	3	0.1875	0.285576	1
	protein homodimerization activity [GO:0042803]	559	70	0.125224	0.287695	1
	structural constituent of ribosome [GO:0003735]	157	21	0.133758	0.288868	1
	endonuclease activity [GO:0004519]	31	5	0.16129	0.293095	1
	ATP hydrolysis activity [GO:0016887]	305	39	0.127869	0.299732	1
	phosphatidylinositol-3-phosphate binding [GO:0032266]	39	6	0.153846	0.301931	1
	phosphatidylinositol-4-phosphate binding [GO:0070273]	24	4	0.166667	0.306094	1
	tRNA (guanine) methyltransferase activity [GO:0016423]	3	1	0.333333	0.311246	1
	phosphorylase kinase regulator activity [GO:0008607]	3	1	0.333333	0.311246	1
	structural constituent of postsynaptic intermediate filament cytoskeleton [GO:0099184]	3	1	0.333333	0.311246	1
	RNA uridylyltransferase activity [GO:0050265]	3	1	0.333333	0.311246	1
	exo-alpha-(2->8)-sialidase activity [GO:0052796]	3	1	0.333333	0.311246	1
	mRNA (adenine-N1-)-methyltransferase activity [GO:0061953]	3	1	0.333333	0.311246	1
	exo-alpha-(2->3)-sialidase activity [GO:0052794]	3	1	0.333333	0.311246	1
	complement binding [GO:0001848]	3	1	0.333333	0.311246	1
	exo-alpha-(2->6)-sialidase activity [GO:0052795]	3	1	0.333333	0.311246	1
	exo-alpha-sialidase activity [GO:0004308]	3	1	0.333333	0.311246	1
	DNA/DNA annealing activity [GO:1990814]	3	1	0.333333	0.311246	1
	tRNA (guanine(9)-N(1))-methyltransferase activity [GO:0052905]	3	1	0.333333	0.311246	1
	omega peptidase activity [GO:0008242]	3	1	0.333333	0.311246	1
	tumor necrosis factor binding [GO:0043120]	3	1	0.333333	0.311246	1
	polydeoxyribonucleotide 5'-hydroxyl-kinase activity [GO:0046404]	3	1	0.333333	0.311246	1
	nitrate reductase activity [GO:0008940]	3	1	0.333333	0.311246	1
	arylesterase activity [GO:0004064]	3	1	0.333333	0.311246	1
	ferroxidase activity [GO:0004322]	3	1	0.333333	0.311246	1
	benzaldehyde dehydrogenase (NAD+) activity [GO:0018479]	3	1	0.333333	0.311246	1
	tRNA pseudouridine synthase activity [GO:0106029]	3	1	0.333333	0.311246	1
	1-alkylglycerophosphocholine O-acetyltransferase activity [GO:0047192]	3	1	0.333333	0.311246	1
	peroxisome targeting sequence binding [GO:0000268]	3	1	0.333333	0.311246	1
	protein tyrosine kinase inhibitor activity [GO:0030292]	3	1	0.333333	0.311246	1
	phosphatidate cytidylyltransferase activity [GO:0004605]	3	1	0.333333	0.311246	1
	phosphoglucomutase activity [GO:0004614]	3	1	0.333333	0.311246	1
	lysophosphatidic acid acyltransferase activity [GO:0042171]	3	1	0.333333	0.311246	1
	11-cis-retinol dehydrogenase activity [GO:0102354]	3	1	0.333333	0.311246	1
	medium-chain-acyl-CoA dehydrogenase activity [GO:0070991]	3	1	0.333333	0.311246	1
	protein kinase C inhibitor activity [GO:0008426]	3	1	0.333333	0.311246	1
	glycogen (starch) synthase activity [GO:0004373]	3	1	0.333333	0.311246	1
	amino acid:proton symporter activity [GO:0005280]	3	1	0.333333	0.311246	1
	15-oxoprostaglandin 13-oxidase activity [GO:0047522]	3	1	0.333333	0.311246	1
	13-prostaglandin reductase activity [GO:0036132]	3	1	0.333333	0.311246	1
	RIG-I binding [GO:0039552]	3	1	0.333333	0.311246	1
	PTB domain binding [GO:0051425]	3	1	0.333333	0.311246	1
	type II activin receptor binding [GO:0070699]	3	1	0.333333	0.311246	1
	interleukin-1 receptor antagonist activity [GO:0005152]	3	1	0.333333	0.311246	1
	sulfate binding [GO:0043199]	3	1	0.333333	0.311246	1
	biotin transmembrane transporter activity [GO:0015225]	3	1	0.333333	0.311246	1
	vascular endothelial growth factor receptor binding [GO:0005172]	3	1	0.333333	0.311246	1
	3-chloroallyl aldehyde dehydrogenase activity [GO:0004028]	3	1	0.333333	0.311246	1
	coreceptor activity involved in canonical Wnt signaling pathway [GO:1904928]	3	1	0.333333	0.311246	1
	1-phosphatidylinositol-5-phosphate 4-kinase activity [GO:0016309]	3	1	0.333333	0.311246	1
	transcription regulator activator activity [GO:0140537]	3	1	0.333333	0.311246	1
	oleoyl-CoA ligase activity [GO:0090434]	3	1	0.333333	0.311246	1
	8-hydroxy-2'-deoxyguanosine DNA binding [GO:1905773]	3	1	0.333333	0.311246	1
	soluble NSF attachment protein activity [GO:0005483]	3	1	0.333333	0.311246	1
	lncRNA binding [GO:0106222]	3	1	0.333333	0.311246	1
	pyrroline-5-carboxylate reductase activity [GO:0004735]	3	1	0.333333	0.311246	1
	tRNA-specific adenosine deaminase activity [GO:0008251]	3	1	0.333333	0.311246	1
	nucleoside binding [GO:0001882]	3	1	0.333333	0.311246	1
	flavin-linked sulfhydryl oxidase activity [GO:0016971]	3	1	0.333333	0.311246	1
	NEDD8 ligase activity [GO:0061663]	3	1	0.333333	0.311246	1
	DNA ligase (ATP) activity [GO:0003910]	3	1	0.333333	0.311246	1
	platelet-activating factor acetyltransferase activity [GO:0047179]	3	1	0.333333	0.311246	1
	ribonucleoside binding [GO:0032549]	3	1	0.333333	0.311246	1
	glycine binding [GO:0016594]	3	1	0.333333	0.311246	1
	structural constituent of postsynaptic density [GO:0098919]	3	1	0.333333	0.311246	1
	palmitoyl-CoA ligase activity [GO:0090433]	3	1	0.333333	0.311246	1
	purine nucleotide binding [GO:0017076]	3	1	0.333333	0.311246	1
	UDP-galactosyltransferase activity [GO:0035250]	3	1	0.333333	0.311246	1
	estrogen response element binding [GO:0034056]	3	1	0.333333	0.311246	1
	acetylcholine receptor regulator activity [GO:0030548]	3	1	0.333333	0.311246	1
	threonine-tRNA ligase activity [GO:0004829]	3	1	0.333333	0.311246	1
	calcium-dependent phospholipase A2 activity [GO:0047498]	3	1	0.333333	0.311246	1
	phosphothreonine residue binding [GO:0050816]	3	1	0.333333	0.311246	1
	rRNA (cytosine-C5-)-methyltransferase activity [GO:0009383]	3	1	0.333333	0.311246	1
	NFAT protein binding [GO:0051525]	3	1	0.333333	0.311246	1
	nicotinate-nucleotide diphosphorylase (carboxylating) activity [GO:0004514]	3	1	0.333333	0.311246	1
	inositol monophosphate 4-phosphatase activity [GO:0052833]	3	1	0.333333	0.311246	1
	inositol monophosphate 3-phosphatase activity [GO:0052832]	3	1	0.333333	0.311246	1
	inositol monophosphate 1-phosphatase activity [GO:0008934]	3	1	0.333333	0.311246	1
	deoxyribonuclease I activity [GO:0004530]	3	1	0.333333	0.311246	1
	cobalt ion transmembrane transporter activity [GO:0015087]	3	1	0.333333	0.311246	1
	ferrous iron transmembrane transporter activity [GO:0015093]	3	1	0.333333	0.311246	1
	protein sequestering activity [GO:0140311]	3	1	0.333333	0.311246	1
	inorganic cation transmembrane transporter activity [GO:0022890]	3	1	0.333333	0.311246	1
	histone H3-tri/di-methyl-lysine-27 demethylase activity [GO:0071558]	3	1	0.333333	0.311246	1
	endoplasmic reticulum signal peptide binding [GO:0030942]	3	1	0.333333	0.311246	1
	DNA (cytosine-5-)-methyltransferase activity [GO:0003886]	3	1	0.333333	0.311246	1
	tRNA (adenine-N1-)-methyltransferase activity [GO:0016429]	3	1	0.333333	0.311246	1
	DNA ligase activity [GO:0003909]	3	1	0.333333	0.311246	1
	pyrophosphatase activity [GO:0016462]	3	1	0.333333	0.311246	1
	histone H4-methyl-lysine-20 demethylase activity [GO:0035575]	3	1	0.333333	0.311246	1
	interleukin-2 receptor binding [GO:0005134]	3	1	0.333333	0.311246	1
	dodecenoyl-CoA delta-isomerase activity [GO:0004165]	3	1	0.333333	0.311246	1
	procollagen galactosyltransferase activity [GO:0050211]	3	1	0.333333	0.311246	1
	malate dehydrogenase (decarboxylating) (NAD+) activity [GO:0004471]	3	1	0.333333	0.311246	1
	oxoglutarate dehydrogenase (succinyl-transferring) activity [GO:0004591]	3	1	0.333333	0.311246	1
	peptide hormone receptor binding [GO:0051428]	3	1	0.333333	0.311246	1
	type 1 angiotensin receptor binding [GO:0031702]	3	1	0.333333	0.311246	1
	sterol response element binding [GO:0032810]	3	1	0.333333	0.311246	1
	malate dehydrogenase (decarboxylating) (NADP+) activity [GO:0004473]	3	1	0.333333	0.311246	1
	fatty-acyl-CoA binding [GO:0000062]	17	3	0.176471	0.319201	1
	MAP kinase kinase activity [GO:0004708]	17	3	0.176471	0.319201	1
	2-oxoglutarate-dependent dioxygenase activity [GO:0016706]	17	3	0.176471	0.319201	1
	DNA helicase activity [GO:0003678]	48	7	0.145833	0.327159	1
	translation initiation factor activity [GO:0003743]	48	7	0.145833	0.327159	1
	serine-type endopeptidase inhibitor activity [GO:0004867]	56	8	0.142857	0.329367	1
	translation repressor activity [GO:0030371]	10	2	0.2	0.329581	1
	pre-mRNA intronic binding [GO:0097157]	10	2	0.2	0.329581	1
	protein methyltransferase activity [GO:0008276]	10	2	0.2	0.329581	1
	glucose binding [GO:0005536]	10	2	0.2	0.329581	1
	proteoglycan binding [GO:0043394]	10	2	0.2	0.329581	1
	G-rich strand telomeric DNA binding [GO:0098505]	10	2	0.2	0.329581	1
	protein tyrosine kinase activity [GO:0004713]	72	10	0.138889	0.331014	1
	14-3-3 protein binding [GO:0071889]	25	4	0.16	0.333864	1
	phosphatidylinositol-3,5-bisphosphate binding [GO:0080025]	25	4	0.16	0.333864	1
	transcription corepressor activity [GO:0003714]	162	21	0.12963	0.34112	1
	SH2 domain binding [GO:0042169]	33	5	0.151515	0.341188	1
	Hsp90 protein binding [GO:0051879]	33	5	0.151515	0.341188	1
	molecular adaptor activity [GO:0060090]	57	8	0.140351	0.347657	1
	protein domain specific binding [GO:0019904]	196	25	0.127551	0.352475	1
	myosin binding [GO:0017022]	18	3	0.166667	0.352855	1
	bHLH transcription factor binding [GO:0043425]	18	3	0.166667	0.352855	1
	protein transmembrane transporter activity [GO:0008320]	18	3	0.166667	0.352855	1
	RNA polymerase II core promoter sequence-specific DNA binding [GO:0000979]	18	3	0.166667	0.352855	1
	protein-lysine N-methyltransferase activity [GO:0016279]	18	3	0.166667	0.352855	1
	RNA polymerase II transcription regulatory region sequence-specific DNA binding [GO:0000977]	205	26	0.126829	0.359672	1
	protein kinase activator activity [GO:0030295]	26	4	0.153846	0.361732	1
	thyroid hormone receptor binding [GO:0046966]	26	4	0.153846	0.361732	1
	telomeric DNA binding [GO:0042162]	26	4	0.153846	0.361732	1
	hydrolase activity [GO:0016787]	66	9	0.136364	0.364848	1
	peptidase activity [GO:0008233]	66	9	0.136364	0.364848	1
	serine-type peptidase activity [GO:0008236]	34	5	0.147059	0.365465	1
	chromatin DNA binding [GO:0031490]	58	8	0.137931	0.36607	1
	protein kinase regulator activity [GO:0019887]	11	2	0.181818	0.374213	1
	DNA-(apurinic or apyrimidinic site) endonuclease activity [GO:0003906]	11	2	0.181818	0.374213	1
	histone methyltransferase binding [GO:1990226]	11	2	0.181818	0.374213	1
	3'-5' DNA helicase activity [GO:0043138]	11	2	0.181818	0.374213	1
	U3 snoRNA binding [GO:0034511]	11	2	0.181818	0.374213	1
	SUMO binding [GO:0032183]	11	2	0.181818	0.374213	1
	MAP-kinase scaffold activity [GO:0005078]	11	2	0.181818	0.374213	1
	HMG box domain binding [GO:0071837]	11	2	0.181818	0.374213	1
	histone H3-methyl-lysine-9 demethylase activity [GO:0032454]	11	2	0.181818	0.374213	1
	metal ion binding [GO:0046872]	1716	205	0.119464	0.380282	1
	microtubule plus-end binding [GO:0051010]	19	3	0.157895	0.386292	1
	spectrin binding [GO:0030507]	19	3	0.157895	0.386292	1
	nucleotidyltransferase activity [GO:0016779]	19	3	0.157895	0.386292	1
	SUMO transferase activity [GO:0019789]	19	3	0.157895	0.386292	1
	SMAD binding [GO:0046332]	43	6	0.139535	0.388613	1
	signaling receptor complex adaptor activity [GO:0030159]	27	4	0.148148	0.389553	1
	G protein-coupled receptor binding [GO:0001664]	35	5	0.142857	0.389763	1
	chloride channel regulator activity [GO:0017081]	4	1	0.25	0.391746	1
	oxidized purine DNA binding [GO:0032357]	4	1	0.25	0.391746	1
	RNA polymerase I general transcription initiation factor activity [GO:0001181]	4	1	0.25	0.391746	1
	ErbB-3 class receptor binding [GO:0043125]	4	1	0.25	0.391746	1
	rRNA (adenine-N6,N6-)-dimethyltransferase activity [GO:0000179]	4	1	0.25	0.391746	1
	satellite DNA binding [GO:0003696]	4	1	0.25	0.391746	1
	mitochondrion targeting sequence binding [GO:0030943]	4	1	0.25	0.391746	1
	sodium channel activity [GO:0005272]	4	1	0.25	0.391746	1
	tRNA dihydrouridine synthase activity [GO:0017150]	4	1	0.25	0.391746	1
	exodeoxyribonuclease III activity [GO:0008853]	4	1	0.25	0.391746	1
	3'-5' RNA helicase activity [GO:0034458]	4	1	0.25	0.391746	1
	ISG15 transferase activity [GO:0042296]	4	1	0.25	0.391746	1
	protein carrier chaperone [GO:0140597]	4	1	0.25	0.391746	1
	acetyl-CoA hydrolase activity [GO:0003986]	4	1	0.25	0.391746	1
	DNA topoisomerase type I (single strand cut, ATP-independent) activity [GO:0003917]	4	1	0.25	0.391746	1
	glutathione transmembrane transporter activity [GO:0034634]	4	1	0.25	0.391746	1
	peptidoglycan binding [GO:0042834]	4	1	0.25	0.391746	1
	galactoside binding [GO:0016936]	4	1	0.25	0.391746	1
	adenosine-diphosphatase activity [GO:0043262]	4	1	0.25	0.391746	1
	neuropilin binding [GO:0038191]	4	1	0.25	0.391746	1
	L27 domain binding [GO:0097016]	4	1	0.25	0.391746	1
	RNA polymerase II C-terminal domain binding [GO:0099122]	4	1	0.25	0.391746	1
	acyl-CoA oxidase activity [GO:0003997]	4	1	0.25	0.391746	1
	histone methyltransferase activity (H4-R3 specific) [GO:0044020]	4	1	0.25	0.391746	1
	RNA polymerase I core promoter sequence-specific DNA binding [GO:0001164]	4	1	0.25	0.391746	1
	WD40-repeat domain binding [GO:0071987]	4	1	0.25	0.391746	1
	tRNA (guanine-N1-)-methyltransferase activity [GO:0009019]	4	1	0.25	0.391746	1
	polysome binding [GO:1905538]	4	1	0.25	0.391746	1
	keratin filament binding [GO:1990254]	4	1	0.25	0.391746	1
	UDP-galactose:beta-N-acetylglucosamine beta-1,3-galactosyltransferase activity [GO:0008499]	4	1	0.25	0.391746	1
	arachidonic acid binding [GO:0050544]	4	1	0.25	0.391746	1
	aspartic-type endopeptidase inhibitor activity [GO:0019828]	4	1	0.25	0.391746	1
	phosphoserine residue binding [GO:0050815]	4	1	0.25	0.391746	1
	oleate transmembrane transporter activity [GO:1901480]	4	1	0.25	0.391746	1
	phospholipase inhibitor activity [GO:0004859]	4	1	0.25	0.391746	1
	exopeptidase activity [GO:0008238]	4	1	0.25	0.391746	1
	oxidative RNA demethylase activity [GO:0035515]	4	1	0.25	0.391746	1
	inositol-1,4,5-trisphosphate 3-kinase activity [GO:0008440]	4	1	0.25	0.391746	1
	chromatin insulator sequence binding [GO:0043035]	4	1	0.25	0.391746	1
	palmitoyl-CoA oxidase activity [GO:0016401]	4	1	0.25	0.391746	1
	mitochondrial ribosome binding [GO:0097177]	4	1	0.25	0.391746	1
	arrestin family protein binding [GO:1990763]	4	1	0.25	0.391746	1
	acetate-CoA ligase activity [GO:0003987]	4	1	0.25	0.391746	1
	ubiquitin modification-dependent histone binding [GO:0061649]	4	1	0.25	0.391746	1
	oxaloacetate decarboxylase activity [GO:0008948]	4	1	0.25	0.391746	1
	beta-N-acetylhexosaminidase activity [GO:0004563]	4	1	0.25	0.391746	1
	purine-rich negative regulatory element binding [GO:0032422]	4	1	0.25	0.391746	1
	histone pre-mRNA DCP binding [GO:0071208]	4	1	0.25	0.391746	1
	NF-kappaB-inducing kinase activity [GO:0004704]	4	1	0.25	0.391746	1
	malic enzyme activity [GO:0004470]	4	1	0.25	0.391746	1
	beta-1 adrenergic receptor binding [GO:0031697]	4	1	0.25	0.391746	1
	adenosine 5'-monophosphoramidase activity [GO:0043530]	4	1	0.25	0.391746	1
	ATP binding [GO:0005524]	1204	144	0.119601	0.397384	1
	calcium-dependent protein binding [GO:0048306]	60	8	0.133333	0.403093	1
	double-stranded DNA binding [GO:0003690]	93	12	0.129032	0.404009	1
	RNA helicase activity [GO:0003724]	69	9	0.130435	0.416853	1
	lipid transporter activity [GO:0005319]	12	2	0.166667	0.417571	1
	acetyltransferase activity [GO:0016407]	12	2	0.166667	0.417571	1
	pre-mRNA binding [GO:0036002]	12	2	0.166667	0.417571	1
	RNA polymerase III general transcription initiation factor activity [GO:0000995]	12	2	0.166667	0.417571	1
	R-SMAD binding [GO:0070412]	20	3	0.15	0.419294	1
	DNA polymerase binding [GO:0070182]	20	3	0.15	0.419294	1
	protein kinase A binding [GO:0051018]	20	3	0.15	0.419294	1
	protein tyrosine kinase binding [GO:1990782]	21	3	0.142857	0.451677	1
	protein kinase A catalytic subunit binding [GO:0034236]	13	2	0.153846	0.459341	1
	protein kinase C activity [GO:0004697]	13	2	0.153846	0.459341	1
	ribonuclease activity [GO:0004540]	13	2	0.153846	0.459341	1
	ubiquitin-ubiquitin ligase activity [GO:0034450]	13	2	0.153846	0.459341	1
	receptor ligand activity [GO:0048018]	13	2	0.153846	0.459341	1
	retinoic acid receptor binding [GO:0042974]	13	2	0.153846	0.459341	1
	N-acetyltransferase activity [GO:0008080]	13	2	0.153846	0.459341	1
	cargo receptor activity [GO:0038024]	13	2	0.153846	0.459341	1
	4 iron, 4 sulfur cluster binding [GO:0051539]	38	5	0.131579	0.461893	1
	protein-glutamine gamma-glutamyltransferase activity [GO:0003810]	5	1	0.2	0.462836	1
	1-alkyl-2-acetylglycerophosphocholine esterase activity [GO:0003847]	5	1	0.2	0.462836	1
	double-stranded methylated DNA binding [GO:0010385]	5	1	0.2	0.462836	1
	ATP-dependent activity, acting on RNA [GO:0008186]	5	1	0.2	0.462836	1
	creatine kinase activity [GO:0004111]	5	1	0.2	0.462836	1
	pyruvate dehydrogenase (acetyl-transferring) kinase activity [GO:0004740]	5	1	0.2	0.462836	1
	ligand-gated calcium channel activity [GO:0099604]	5	1	0.2	0.462836	1
	pre-mRNA 3'-splice site binding [GO:0030628]	5	1	0.2	0.462836	1
	deoxycytidine deaminase activity [GO:0047844]	5	1	0.2	0.462836	1
	phosphatase inhibitor activity [GO:0019212]	5	1	0.2	0.462836	1
	cytidine deaminase activity [GO:0004126]	5	1	0.2	0.462836	1
	inorganic diphosphatase activity [GO:0004427]	5	1	0.2	0.462836	1
	manganese ion transmembrane transporter activity [GO:0005384]	5	1	0.2	0.462836	1
	single-stranded telomeric DNA binding [GO:0043047]	5	1	0.2	0.462836	1
	small protein activating enzyme binding [GO:0044388]	5	1	0.2	0.462836	1
	protein antigen binding [GO:1990405]	5	1	0.2	0.462836	1
	histone-arginine N-methyltransferase activity [GO:0008469]	5	1	0.2	0.462836	1
	phosphatidylinositol phosphate 4-phosphatase activity [GO:0034596]	5	1	0.2	0.462836	1
	insulin binding [GO:0043559]	5	1	0.2	0.462836	1
	phospholipase activator activity [GO:0016004]	5	1	0.2	0.462836	1
	cargo adaptor activity [GO:0140312]	5	1	0.2	0.462836	1
	TFIIB-class transcription factor binding [GO:0001093]	5	1	0.2	0.462836	1
	intraciliary transport particle B binding [GO:0120170]	5	1	0.2	0.462836	1
	T cell receptor binding [GO:0042608]	5	1	0.2	0.462836	1
	type 5 metabotropic glutamate receptor binding [GO:0031802]	5	1	0.2	0.462836	1
	long-chain fatty acyl-CoA binding [GO:0036042]	5	1	0.2	0.462836	1
	NEDD8 transferase activity [GO:0019788]	5	1	0.2	0.462836	1
	rDNA binding [GO:0000182]	5	1	0.2	0.462836	1
	ribose phosphate diphosphokinase activity [GO:0004749]	5	1	0.2	0.462836	1
	calmodulin-dependent protein phosphatase activity [GO:0033192]	5	1	0.2	0.462836	1
	molybdopterin cofactor binding [GO:0043546]	5	1	0.2	0.462836	1
	phosphatidylinositol-3,5-bisphosphate 5-phosphatase activity [GO:0043813]	5	1	0.2	0.462836	1
	phosphorylation-dependent protein binding [GO:0140031]	5	1	0.2	0.462836	1
	P-type sodium:potassium-exchanging transporter activity [GO:0005391]	5	1	0.2	0.462836	1
	enzyme binding [GO:0019899]	318	38	0.119497	0.467956	1
	protein tyrosine phosphatase activity [GO:0004725]	72	9	0.125	0.4687	1
	DNA-binding transcription activator activity, RNA polymerase II-specific [GO:0001228]	310	37	0.119355	0.472103	1
	kinase activity [GO:0016301]	56	7	0.125	0.485853	1
	steroid hormone receptor activity [GO:0003707]	14	2	0.142857	0.499304	1
	3'-5' exonuclease activity [GO:0008408]	14	2	0.142857	0.499304	1
	S-adenosyl-L-methionine binding [GO:1904047]	14	2	0.142857	0.499304	1
	nuclease activity [GO:0004518]	14	2	0.142857	0.499304	1
	cell-cell adhesion mediator activity [GO:0098632]	14	2	0.142857	0.499304	1
	manganese ion binding [GO:0030145]	57	7	0.122807	0.5052	1
	PDZ domain binding [GO:0030165]	57	7	0.122807	0.5052	1
	K63-linked polyubiquitin modification-dependent protein binding [GO:0070530]	23	3	0.130435	0.513992	1
	structural constituent of nuclear pore [GO:0017056]	23	3	0.130435	0.513992	1
	peptidyl-prolyl cis-trans isomerase activity [GO:0003755]	32	4	0.125	0.523725	1
	clathrin binding [GO:0030276]	32	4	0.125	0.523725	1
	calcium-release channel activity [GO:0015278]	6	1	0.166667	0.525618	1
	hydrolase activity, acting on glycosyl bonds [GO:0016798]	6	1	0.166667	0.525618	1
	H3 histone acetyltransferase activity [GO:0010484]	6	1	0.166667	0.525618	1
	histone H3-methyl-lysine-4 demethylase activity [GO:0032453]	6	1	0.166667	0.525618	1
	oxidoreductase activity, acting on single donors with incorporation of molecular oxygen, incorporation of two atoms of oxygen [GO:0016702]	6	1	0.166667	0.525618	1
	dipeptidase activity [GO:0016805]	6	1	0.166667	0.525618	1
	phosphatidylcholine transporter activity [GO:0008525]	6	1	0.166667	0.525618	1
	AMP-activated protein kinase activity [GO:0004679]	6	1	0.166667	0.525618	1
	sodium channel inhibitor activity [GO:0019871]	6	1	0.166667	0.525618	1
	neurotrophin TRKA receptor binding [GO:0005168]	6	1	0.166667	0.525618	1
	microtubule-severing ATPase activity [GO:0008568]	6	1	0.166667	0.525618	1
	SUMO-specific isopeptidase activity [GO:0070140]	6	1	0.166667	0.525618	1
	fatty acid elongase activity [GO:0009922]	6	1	0.166667	0.525618	1
	very-long-chain 3-ketoacyl-CoA synthase activity [GO:0102756]	6	1	0.166667	0.525618	1
	signal recognition particle binding [GO:0005047]	6	1	0.166667	0.525618	1
	inositol-polyphosphate 5-phosphatase activity [GO:0004445]	6	1	0.166667	0.525618	1
	P-type calcium transporter activity [GO:0005388]	6	1	0.166667	0.525618	1
	protein tyrosine kinase activator activity [GO:0030296]	6	1	0.166667	0.525618	1
	cobalamin binding [GO:0031419]	6	1	0.166667	0.525618	1
	fatty acid transmembrane transporter activity [GO:0015245]	6	1	0.166667	0.525618	1
	3-hydroxyacyl-CoA dehydrogenase activity [GO:0003857]	6	1	0.166667	0.525618	1
	translation release factor activity [GO:0003747]	6	1	0.166667	0.525618	1
	glutamate receptor binding [GO:0035254]	6	1	0.166667	0.525618	1
	modified amino acid binding [GO:0072341]	6	1	0.166667	0.525618	1
	U4 snRNA binding [GO:0030621]	6	1	0.166667	0.525618	1
	carbonate dehydratase activity [GO:0004089]	6	1	0.166667	0.525618	1
	TPR domain binding [GO:0030911]	6	1	0.166667	0.525618	1
	phosphatidylcholine transfer activity [GO:0120019]	6	1	0.166667	0.525618	1
	D1 dopamine receptor binding [GO:0031748]	6	1	0.166667	0.525618	1
	inositol hexakisphosphate kinase activity [GO:0000828]	6	1	0.166667	0.525618	1
	kinetochore binding [GO:0043515]	6	1	0.166667	0.525618	1
	Roundabout binding [GO:0048495]	6	1	0.166667	0.525618	1
	four-way junction helicase activity [GO:0009378]	6	1	0.166667	0.525618	1
	inositol-1,3,4,5-tetrakisphosphate 5-phosphatase activity [GO:0052659]	6	1	0.166667	0.525618	1
	sphingosine N-acyltransferase activity [GO:0050291]	6	1	0.166667	0.525618	1
	nucleoside-triphosphate diphosphatase activity [GO:0047429]	6	1	0.166667	0.525618	1
	mitogen-activated protein kinase kinase kinase binding [GO:0031435]	15	2	0.133333	0.537311	1
	scaffold protein binding [GO:0097110]	50	6	0.12	0.537599	1
	phosphatidylinositol binding [GO:0035091]	85	10	0.117647	0.541222	1
	ribosome binding [GO:0043022]	59	7	0.118644	0.543107	1
	androgen receptor binding [GO:0050681]	24	3	0.125	0.543692	1
	catalytic activity [GO:0003824]	24	3	0.125	0.543692	1
	calcium channel activity [GO:0005262]	24	3	0.125	0.543692	1
	structural molecule activity [GO:0005198]	94	11	0.117021	0.54588	1
	ribonucleoprotein complex binding [GO:0043021]	33	4	0.121212	0.548902	1
	transcription factor binding [GO:0008134]	25	3	0.12	0.572305	1
	phosphatidylinositol phospholipase C activity [GO:0004435]	16	2	0.125	0.573273	1
	tumor necrosis factor receptor binding [GO:0005164]	16	2	0.125	0.573273	1
	non-membrane spanning protein tyrosine kinase activity [GO:0004715]	34	4	0.117647	0.573361	1
	cis-regulatory region sequence-specific DNA binding [GO:0000987]	43	5	0.116279	0.575206	1
	extracellular matrix structural constituent conferring compression resistance [GO:0030021]	7	1	0.142857	0.581062	1
	1-phosphatidylinositol-4-phosphate 5-kinase activity [GO:0016308]	7	1	0.142857	0.581062	1
	potassium channel inhibitor activity [GO:0019870]	7	1	0.142857	0.581062	1
	calcium ion transmembrane transporter activity [GO:0015085]	7	1	0.142857	0.581062	1
	m7G(5')pppN diphosphatase activity [GO:0050072]	7	1	0.142857	0.581062	1
	ubiquitin-dependent protein binding [GO:0140036]	7	1	0.142857	0.581062	1
	protein transporter activity [GO:0140318]	7	1	0.142857	0.581062	1
	ubiquitin-like protein conjugating enzyme binding [GO:0044390]	7	1	0.142857	0.581062	1
	intermediate filament binding [GO:0019215]	7	1	0.142857	0.581062	1
	LIM domain binding [GO:0030274]	7	1	0.142857	0.581062	1
	class I DNA-(apurinic or apyrimidinic site) endonuclease activity [GO:0140078]	7	1	0.142857	0.581062	1
	disulfide oxidoreductase activity [GO:0015036]	7	1	0.142857	0.581062	1
	virion binding [GO:0046790]	7	1	0.142857	0.581062	1
	phosphatidylinositol-3,4,5-trisphosphate 5-phosphatase activity [GO:0034485]	7	1	0.142857	0.581062	1
	heme transmembrane transporter activity [GO:0015232]	7	1	0.142857	0.581062	1
	non-membrane spanning protein tyrosine phosphatase activity [GO:0004726]	7	1	0.142857	0.581062	1
	inositol-1,4,5-trisphosphate 5-phosphatase activity [GO:0052658]	7	1	0.142857	0.581062	1
	nuclear receptor coactivator activity [GO:0030374]	53	6	0.113208	0.596637	1
	phosphatidylinositol-4,5-bisphosphate binding [GO:0005546]	62	7	0.112903	0.597518	1
	ephrin receptor binding [GO:0046875]	26	3	0.115385	0.599771	1
	epidermal growth factor receptor binding [GO:0005154]	26	3	0.115385	0.599771	1
	ubiquitin conjugating enzyme binding [GO:0031624]	26	3	0.115385	0.599771	1
	enzyme regulator activity [GO:0030234]	17	2	0.117647	0.60715	1
	translation elongation factor activity [GO:0003746]	17	2	0.117647	0.60715	1
	metallocarboxypeptidase activity [GO:0004181]	17	2	0.117647	0.60715	1
	lipopolysaccharide binding [GO:0001530]	17	2	0.117647	0.60715	1
	glutathione transferase activity [GO:0004364]	17	2	0.117647	0.60715	1
	ribosomal small subunit binding [GO:0043024]	17	2	0.117647	0.60715	1
	MAP kinase kinase kinase activity [GO:0004709]	17	2	0.117647	0.60715	1
	thiol-dependent deubiquitinase [GO:0004843]	81	9	0.111111	0.615511	1
	endoribonuclease activity [GO:0004521]	27	3	0.111111	0.626048	1
	JUN kinase binding [GO:0008432]	8	1	0.125	0.630027	1
	iron-sulfur cluster binding [GO:0051536]	8	1	0.125	0.630027	1
	eukaryotic initiation factor 4E binding [GO:0008190]	8	1	0.125	0.630027	1
	adenylate cyclase binding [GO:0008179]	8	1	0.125	0.630027	1
	chloride ion binding [GO:0031404]	8	1	0.125	0.630027	1
	transforming growth factor beta receptor binding [GO:0005160]	8	1	0.125	0.630027	1
	1-acylglycerophosphocholine O-acyltransferase activity [GO:0047184]	8	1	0.125	0.630027	1
	3'-5'-exodeoxyribonuclease activity [GO:0008296]	8	1	0.125	0.630027	1
	alpha-actinin binding [GO:0051393]	8	1	0.125	0.630027	1
	metalloendopeptidase inhibitor activity [GO:0008191]	8	1	0.125	0.630027	1
	polynucleotide adenylyltransferase activity [GO:0004652]	8	1	0.125	0.630027	1
	peroxisome proliferator activated receptor binding [GO:0042975]	8	1	0.125	0.630027	1
	toxic substance binding [GO:0015643]	8	1	0.125	0.630027	1
	proton-transporting ATP synthase activity, rotational mechanism [GO:0046933]	8	1	0.125	0.630027	1
	ATPase-coupled cation transmembrane transporter activity [GO:0019829]	8	1	0.125	0.630027	1
	microtubule minus-end binding [GO:0051011]	8	1	0.125	0.630027	1
	acetylcholine receptor binding [GO:0033130]	8	1	0.125	0.630027	1
	hydrolase activity, acting on ester bonds [GO:0016788]	8	1	0.125	0.630027	1
	N-acyltransferase activity [GO:0016410]	8	1	0.125	0.630027	1
	very long-chain fatty acid-CoA ligase activity [GO:0031957]	8	1	0.125	0.630027	1
	clathrin heavy chain binding [GO:0032050]	8	1	0.125	0.630027	1
	structural constituent of eye lens [GO:0005212]	8	1	0.125	0.630027	1
	vascular endothelial growth factor receptor 2 binding [GO:0043184]	8	1	0.125	0.630027	1
	bubble DNA binding [GO:0000405]	8	1	0.125	0.630027	1
	UDP-glycosyltransferase activity [GO:0008194]	8	1	0.125	0.630027	1
	L-ascorbic acid binding [GO:0031418]	18	2	0.111111	0.638936	1
	steroid binding [GO:0005496]	18	2	0.111111	0.638936	1
	proteasome binding [GO:0070628]	18	2	0.111111	0.638936	1
	syntaxin-1 binding [GO:0017075]	18	2	0.111111	0.638936	1
	fibroblast growth factor binding [GO:0017134]	18	2	0.111111	0.638936	1
	guanyl-nucleotide exchange factor activity [GO:0005085]	173	19	0.109827	0.648446	1
	ATP-dependent activity, acting on DNA [GO:0008094]	28	3	0.107143	0.65111	1
	nuclear receptor activity [GO:0004879]	38	4	0.105263	0.663165	1
	calcium-dependent phospholipid binding [GO:0005544]	38	4	0.105263	0.663165	1
	DNA-directed DNA polymerase activity [GO:0003887]	19	2	0.105263	0.668659	1
	ubiquitin-specific protease binding [GO:1990381]	19	2	0.105263	0.668659	1
	nucleosomal DNA binding [GO:0031492]	19	2	0.105263	0.668659	1
	mitogen-activated protein kinase binding [GO:0051019]	19	2	0.105263	0.668659	1
	DNA N-glycosylase activity [GO:0019104]	9	1	0.111111	0.673268	1
	phosphatidylinositol 3-kinase regulatory subunit binding [GO:0036312]	9	1	0.111111	0.673268	1
	dioxygenase activity [GO:0051213]	9	1	0.111111	0.673268	1
	FK506 binding [GO:0005528]	9	1	0.111111	0.673268	1
	DNA-binding transcription activator activity [GO:0001216]	9	1	0.111111	0.673268	1
	minor groove of adenine-thymine-rich DNA binding [GO:0003680]	9	1	0.111111	0.673268	1
	platelet-derived growth factor binding [GO:0048407]	9	1	0.111111	0.673268	1
	SUMO ligase activity [GO:0061665]	9	1	0.111111	0.673268	1
	deubiquitinase activity [GO:0101005]	9	1	0.111111	0.673268	1
	arachidonate-CoA ligase activity [GO:0047676]	9	1	0.111111	0.673268	1
	co-receptor binding [GO:0039706]	9	1	0.111111	0.673268	1
	phospholipase A1 activity [GO:0008970]	9	1	0.111111	0.673268	1
	2-acylglycerol-3-phosphate O-acyltransferase activity [GO:0047144]	9	1	0.111111	0.673268	1
	oxidoreductase activity, acting on NAD(P)H, quinone or similar compound as acceptor [GO:0016655]	9	1	0.111111	0.673268	1
	phospholipase C activity [GO:0004629]	9	1	0.111111	0.673268	1
	aspartic-type endopeptidase activity [GO:0004190]	9	1	0.111111	0.673268	1
	insulin receptor substrate binding [GO:0043560]	9	1	0.111111	0.673268	1
	H4 histone acetyltransferase activity [GO:0010485]	9	1	0.111111	0.673268	1
	ubiquitin ligase inhibitor activity [GO:1990948]	9	1	0.111111	0.673268	1
	cyclin-dependent protein serine/threonine kinase activator activity [GO:0061575]	9	1	0.111111	0.673268	1
	7SK snRNA binding [GO:0097322]	9	1	0.111111	0.673268	1
	transcription coregulator binding [GO:0001221]	29	3	0.103448	0.674946	1
	GTP binding [GO:0005525]	301	33	0.109635	0.678272	1
	protein dimerization activity [GO:0046983]	77	8	0.103896	0.690698	1
	protein self-association [GO:0043621]	49	5	0.102041	0.692453	1
	electron transfer activity [GO:0009055]	49	5	0.102041	0.692453	1
	oxidoreductase activity, acting on the CH-OH group of donors, NAD or NADP as acceptor [GO:0016616]	20	2	0.1	0.696366	1
	translation initiation factor binding [GO:0031369]	20	2	0.1	0.696366	1
	GTP-dependent protein binding [GO:0030742]	20	2	0.1	0.696366	1
	FAD binding [GO:0071949]	30	3	0.1	0.697556	1
	dynactin binding [GO:0034452]	10	1	0.1	0.711455	1
	general transcription initiation factor binding [GO:0140296]	10	1	0.1	0.711455	1
	protein serine/threonine phosphatase inhibitor activity [GO:0004865]	10	1	0.1	0.711455	1
	vinculin binding [GO:0017166]	10	1	0.1	0.711455	1
	nuclear export signal receptor activity [GO:0005049]	10	1	0.1	0.711455	1
	protein tag [GO:0031386]	10	1	0.1	0.711455	1
	profilin binding [GO:0005522]	10	1	0.1	0.711455	1
	FMN binding [GO:0010181]	10	1	0.1	0.711455	1
	G-quadruplex DNA binding [GO:0051880]	10	1	0.1	0.711455	1
	endodeoxyribonuclease activity [GO:0004520]	10	1	0.1	0.711455	1
	phosphatidylinositol-4,5-bisphosphate 5-phosphatase activity [GO:0004439]	10	1	0.1	0.711455	1
	GDP-dissociation inhibitor activity [GO:0005092]	10	1	0.1	0.711455	1
	phospholipase A2 activity [GO:0004623]	10	1	0.1	0.711455	1
	filamin binding [GO:0031005]	10	1	0.1	0.711455	1
	glutathione binding [GO:0043295]	10	1	0.1	0.711455	1
	four-way junction DNA binding [GO:0000400]	10	1	0.1	0.711455	1
	thioesterase binding [GO:0031996]	10	1	0.1	0.711455	1
	co-SMAD binding [GO:0070410]	10	1	0.1	0.711455	1
	snRNA binding [GO:0017069]	10	1	0.1	0.711455	1
	protein phosphatase activator activity [GO:0072542]	10	1	0.1	0.711455	1
	acyl-CoA dehydrogenase activity [GO:0003995]	10	1	0.1	0.711455	1
	efflux transmembrane transporter activity [GO:0015562]	10	1	0.1	0.711455	1
	chloride channel inhibitor activity [GO:0019869]	10	1	0.1	0.711455	1
	ankyrin binding [GO:0030506]	10	1	0.1	0.711455	1
	damaged DNA binding [GO:0003684]	60	6	0.1	0.716854	1
	G protein activity [GO:0003925]	31	3	0.0967742	0.718948	1
	protein tyrosine/serine/threonine phosphatase activity [GO:0008138]	31	3	0.0967742	0.718948	1
	enzyme activator activity [GO:0008047]	41	4	0.097561	0.721468	1
	extracellular matrix structural constituent conferring tensile strength [GO:0030020]	21	2	0.0952381	0.722123	1
	laminin binding [GO:0043236]	21	2	0.0952381	0.722123	1
	ubiquitin-like protein ligase binding [GO:0044389]	21	2	0.0952381	0.722123	1
	1-acylglycerol-3-phosphate O-acyltransferase activity [GO:0003841]	21	2	0.0952381	0.722123	1
	endopeptidase activity [GO:0004175]	51	5	0.0980392	0.726176	1
	transcription coregulator activity [GO:0003712]	117	12	0.102564	0.726639	1
	GTPase binding [GO:0051020]	32	3	0.09375	0.739144	1
	protease binding [GO:0002020]	81	8	0.0987654	0.743967	1
	histone deacetylase binding [GO:0042826]	100	10	0.1	0.745034	1
	S100 protein binding [GO:0044548]	11	1	0.0909091	0.745179	1
	RNA 7-methylguanosine cap binding [GO:0000340]	11	1	0.0909091	0.745179	1
	acyl-CoA hydrolase activity [GO:0047617]	11	1	0.0909091	0.745179	1
	lyase activity [GO:0016829]	11	1	0.0909091	0.745179	1
	cyclin-dependent protein serine/threonine kinase inhibitor activity [GO:0004861]	11	1	0.0909091	0.745179	1
	S-adenosylmethionine-dependent methyltransferase activity [GO:0008757]	11	1	0.0909091	0.745179	1
	GTPase inhibitor activity [GO:0005095]	11	1	0.0909091	0.745179	1
	MDM2/MDM4 family protein binding [GO:0097371]	11	1	0.0909091	0.745179	1
	phosphatidylinositol transfer activity [GO:0008526]	11	1	0.0909091	0.745179	1
	RNA cap binding [GO:0000339]	11	1	0.0909091	0.745179	1
	dystroglycan binding [GO:0002162]	11	1	0.0909091	0.745179	1
	quinone binding [GO:0048038]	11	1	0.0909091	0.745179	1
	neurexin family protein binding [GO:0042043]	11	1	0.0909091	0.745179	1
	phosphatidylinositol-3,4-bisphosphate binding [GO:0043325]	22	2	0.0909091	0.746007	1
	scavenger receptor activity [GO:0005044]	22	2	0.0909091	0.746007	1
	actin monomer binding [GO:0003785]	22	2	0.0909091	0.746007	1
	low-density lipoprotein particle receptor binding [GO:0050750]	22	2	0.0909091	0.746007	1
	cullin family protein binding [GO:0097602]	22	2	0.0909091	0.746007	1
	GTPase activity [GO:0003924]	257	27	0.105058	0.7497	1
	phosphatidylinositol-3,4,5-trisphosphate binding [GO:0005547]	33	3	0.0909091	0.758168	1
	protein phosphatase regulator activity [GO:0019888]	33	3	0.0909091	0.758168	1
	GDP binding [GO:0019003]	63	6	0.0952381	0.760022	1
	DNA-binding transcription factor activity, RNA polymerase II-specific [GO:0000981]	778	85	0.109254	0.761341	1
	iron ion binding [GO:0005506]	73	7	0.0958904	0.763801	1
	potassium channel regulator activity [GO:0015459]	23	2	0.0869565	0.768104	1
	signaling adaptor activity [GO:0035591]	23	2	0.0869565	0.768104	1
	cyclin-dependent protein serine/threonine kinase regulator activity [GO:0016538]	23	2	0.0869565	0.768104	1
	aminopeptidase activity [GO:0004177]	23	2	0.0869565	0.768104	1
	isomerase activity [GO:0016853]	12	1	0.0833333	0.774962	1
	palmitoyl-(protein) hydrolase activity [GO:0008474]	12	1	0.0833333	0.774962	1
	NADP-retinol dehydrogenase activity [GO:0052650]	12	1	0.0833333	0.774962	1
	GABA receptor binding [GO:0050811]	12	1	0.0833333	0.774962	1
	hydro-lyase activity [GO:0016836]	12	1	0.0833333	0.774962	1
	cation channel activity [GO:0005261]	12	1	0.0833333	0.774962	1
	aldo-keto reductase (NADP) activity [GO:0004033]	12	1	0.0833333	0.774962	1
	U6 snRNA binding [GO:0017070]	12	1	0.0833333	0.774962	1
	retinoid X receptor binding [GO:0046965]	12	1	0.0833333	0.774962	1
	palmitoyl-CoA hydrolase activity [GO:0016290]	12	1	0.0833333	0.774962	1
	insulin-like growth factor receptor binding [GO:0005159]	12	1	0.0833333	0.774962	1
	phosphoprotein phosphatase activity [GO:0004721]	34	3	0.0882353	0.776053	1
	lipid binding [GO:0008289]	84	8	0.0952381	0.779493	1
	transcription coactivator activity [GO:0003713]	216	22	0.101852	0.783268	1
	protein phosphatase inhibitor activity [GO:0004864]	24	2	0.0833333	0.788505	1
	ubiquitin ligase-substrate adaptor activity [GO:1990756]	24	2	0.0833333	0.788505	1
	enzyme inhibitor activity [GO:0004857]	24	2	0.0833333	0.788505	1
	TBP-class protein binding [GO:0017025]	24	2	0.0833333	0.788505	1
	GTPase activator activity [GO:0005096]	218	22	0.100917	0.797049	1
	SH3 domain binding [GO:0017124]	105	10	0.0952381	0.797057	1
	heparan sulfate proteoglycan binding [GO:0043395]	13	1	0.0769231	0.801264	1
	long-chain fatty acid-CoA ligase activity [GO:0004467]	13	1	0.0769231	0.801264	1
	hydrolase activity, hydrolyzing O-glycosyl compounds [GO:0004553]	13	1	0.0769231	0.801264	1
	low-density lipoprotein particle receptor activity [GO:0005041]	13	1	0.0769231	0.801264	1
	exonuclease activity [GO:0004527]	13	1	0.0769231	0.801264	1
	Notch binding [GO:0005112]	13	1	0.0769231	0.801264	1
	I-SMAD binding [GO:0070411]	13	1	0.0769231	0.801264	1
	1-phosphatidylinositol binding [GO:0005545]	13	1	0.0769231	0.801264	1
	NAD+ kinase activity [GO:0003951]	13	1	0.0769231	0.801264	1
	voltage-gated calcium channel activity [GO:0005245]	13	1	0.0769231	0.801264	1
	long-chain fatty acid transporter activity [GO:0005324]	13	1	0.0769231	0.801264	1
	GTPase regulator activity [GO:0030695]	13	1	0.0769231	0.801264	1
	Arp2/3 complex binding [GO:0071933]	13	1	0.0769231	0.801264	1
	cytochrome-c oxidase activity [GO:0004129]	13	1	0.0769231	0.801264	1
	mRNA 5'-UTR binding [GO:0048027]	25	2	0.08	0.807305	1
	frizzled binding [GO:0005109]	25	2	0.08	0.807305	1
	heat shock protein binding [GO:0031072]	47	4	0.0851064	0.814894	1
	flavin adenine dinucleotide binding [GO:0050660]	47	4	0.0851064	0.814894	1
	metalloendopeptidase activity [GO:0004222]	58	5	0.0862069	0.822907	1
	kinesin binding [GO:0019894]	37	3	0.0810811	0.82325	1
	polypeptide N-acetylgalactosaminyltransferase activity [GO:0004653]	14	1	0.0714286	0.824491	1
	translation repressor activity, mRNA regulatory element binding [GO:0000900]	14	1	0.0714286	0.824491	1
	magnesium ion transmembrane transporter activity [GO:0015095]	14	1	0.0714286	0.824491	1
	zinc ion transmembrane transporter activity [GO:0005385]	14	1	0.0714286	0.824491	1
	NADPH binding [GO:0070402]	14	1	0.0714286	0.824491	1
	apolipoprotein binding [GO:0034185]	14	1	0.0714286	0.824491	1
	G-protein beta-subunit binding [GO:0031681]	14	1	0.0714286	0.824491	1
	vitamin D receptor binding [GO:0042809]	14	1	0.0714286	0.824491	1
	GTPase activating protein binding [GO:0032794]	14	1	0.0714286	0.824491	1
	nucleoside diphosphate kinase activity [GO:0004550]	14	1	0.0714286	0.824491	1
	peptide binding [GO:0042277]	26	2	0.0769231	0.824599	1
	microfilament motor activity [GO:0000146]	26	2	0.0769231	0.824599	1
	tubulin binding [GO:0015631]	48	4	0.0833333	0.827651	1
	ATPase binding [GO:0051117]	69	6	0.0869565	0.831386	1
	disordered domain specific binding [GO:0097718]	27	2	0.0740741	0.840483	1
	voltage-gated potassium channel activity [GO:0005249]	15	1	0.0666667	0.845004	1
	3',5'-cyclic-AMP phosphodiesterase activity [GO:0004115]	15	1	0.0666667	0.845004	1
	phospholipase binding [GO:0043274]	15	1	0.0666667	0.845004	1
	NAD+ binding [GO:0070403]	15	1	0.0666667	0.845004	1
	retinoic acid binding [GO:0001972]	15	1	0.0666667	0.845004	1
	proton transmembrane transporter activity [GO:0015078]	15	1	0.0666667	0.845004	1
	MHC class II protein complex binding [GO:0023026]	15	1	0.0666667	0.845004	1
	SNARE binding [GO:0000149]	50	4	0.08	0.850974	1
	E-box binding [GO:0070888]	28	2	0.0714286	0.85505	1
	signaling receptor activity [GO:0038023]	92	8	0.0869565	0.85626	1
	hyaluronic acid binding [GO:0005540]	16	1	0.0625	0.86312	1
	cysteine-type endopeptidase inhibitor activity involved in apoptotic process [GO:0043027]	16	1	0.0625	0.86312	1
	symporter activity [GO:0015293]	17	1	0.0588235	0.879118	1
	transporter activity [GO:0005215]	17	1	0.0588235	0.879118	1
	3',5'-cyclic-nucleotide phosphodiesterase activity [GO:0004114]	17	1	0.0588235	0.879118	1
	phospholipase activity [GO:0004620]	17	1	0.0588235	0.879118	1
	protein disulfide isomerase activity [GO:0003756]	17	1	0.0588235	0.879118	1
	ubiquitin conjugating enzyme activity [GO:0061631]	31	2	0.0645161	0.891742	1
	receptor tyrosine kinase binding [GO:0030971]	43	3	0.0697674	0.892543	1
	Wnt-protein binding [GO:0017147]	18	1	0.0555556	0.893246	1
	G-protein alpha-subunit binding [GO:0001965]	18	1	0.0555556	0.893246	1
	calmodulin-dependent protein kinase activity [GO:0004683]	19	1	0.0526316	0.905723	1
	ferrous iron binding [GO:0008198]	19	1	0.0526316	0.905723	1
	phosphatidylcholine binding [GO:0031210]	19	1	0.0526316	0.905723	1
	proton-transporting ATPase activity, rotational mechanism [GO:0046961]	19	1	0.0526316	0.905723	1
	phosphatidylinositol phosphate binding [GO:1901981]	19	1	0.0526316	0.905723	1
	fatty acid binding [GO:0005504]	19	1	0.0526316	0.905723	1
	phosphatidylserine binding [GO:0001786]	45	3	0.0666667	0.909534	1
	metallopeptidase activity [GO:0008237]	33	2	0.0606061	0.911189	1
	glycosyltransferase activity [GO:0016757]	20	1	0.05	0.916742	1
	phosphatidic acid binding [GO:0070300]	20	1	0.05	0.916742	1
	2 iron, 2 sulfur cluster binding [GO:0051537]	20	1	0.05	0.916742	1
	transmembrane transporter activity [GO:0022857]	46	3	0.0652174	0.91708	1
	phospholipid binding [GO:0005543]	81	6	0.0740741	0.922899	1
	chaperone binding [GO:0051087]	92	7	0.076087	0.923626	1
	signaling receptor binding [GO:0005102]	205	18	0.0878049	0.924617	1
	translation factor activity, RNA binding [GO:0008135]	21	1	0.047619	0.926473	1
	metalloaminopeptidase activity [GO:0070006]	21	1	0.047619	0.926473	1
	phosphotyrosine residue binding [GO:0001784]	35	2	0.0571429	0.92732	1
	copper ion binding [GO:0005507]	36	2	0.0555556	0.934306	1
	hormone activity [GO:0005179]	22	1	0.0454545	0.935066	1
	WW domain binding [GO:0050699]	22	1	0.0454545	0.935066	1
	protein-disulfide reductase activity [GO:0015035]	22	1	0.0454545	0.935066	1
	transmembrane transporter binding [GO:0044325]	84	6	0.0714286	0.937471	1
	NADH dehydrogenase (ubiquinone) activity [GO:0008137]	37	2	0.0540541	0.940653	1
	ATPase activator activity [GO:0001671]	23	1	0.0434783	0.942656	1
	protein phosphatase 1 binding [GO:0008157]	23	1	0.0434783	0.942656	1
	NADP binding [GO:0050661]	24	1	0.0416667	0.949358	1
	kinase binding [GO:0019900]	76	5	0.0657895	0.951216	1
	cholesterol binding [GO:0015485]	40	2	0.05	0.956372	1
	cytokine activity [GO:0005125]	54	3	0.0555556	0.959595	1
	oxidoreductase activity [GO:0016491]	79	5	0.0632911	0.961387	1
	protein serine/threonine phosphatase activity [GO:0004722]	67	4	0.0597015	0.961402	1
	magnesium ion binding [GO:0000287]	189	15	0.0793651	0.963108	1
	ADP binding [GO:0043531]	27	1	0.037037	0.96512	1
	protein kinase inhibitor activity [GO:0004860]	27	1	0.037037	0.96512	1
	integrin binding [GO:0005178]	116	8	0.0689655	0.967948	1
	protein kinase C binding [GO:0005080]	43	2	0.0465116	0.968055	1
	heparin binding [GO:0008201]	105	7	0.0666667	0.968669	1
	collagen binding [GO:0005518]	44	2	0.0454545	0.971231	1
	heme binding [GO:0020037]	73	4	0.0547945	0.976961	1
	SNAP receptor activity [GO:0005484]	32	1	0.03125	0.981264	1
	protein folding chaperone [GO:0044183]	33	1	0.030303	0.983454	1
	amyloid-beta binding [GO:0001540]	50	2	0.04	0.984764	1
	Hsp70 protein binding [GO:0030544]	34	1	0.0294118	0.985387	1
	transmembrane signaling receptor activity [GO:0004888]	41	1	0.0243902	0.993878	1
	growth factor activity [GO:0008083]	63	2	0.031746	0.996288	1
	carbohydrate binding [GO:0030246]	80	3	0.0375	0.996784	1
	G protein-coupled receptor activity [GO:0004930]	50	1	0.02	0.998	1
	calcium ion binding [GO:0005509]	414	31	0.0748792	0.99808	1
	virus receptor activity [GO:0001618]	52	1	0.0192308	0.99844	1
	unfolded protein binding [GO:0051082]	95	3	0.0315789	0.999316	1
	transmembrane receptor protein tyrosine kinase activity [GO:0004714]	41	0	0	1	1
	protein-transporting ATPase activity [GO:0015450]	1	0	0	1	1
	delta24(24-1) sterol reductase activity [GO:0000246]	1	0	0	1	1
	delta24-sterol reductase activity [GO:0050614]	1	0	0	1	1
	oxidoreductase activity, acting on the CH-CH group of donors, NAD or NADP as acceptor [GO:0016628]	3	0	0	1	1
	inositol 1,4,5-trisphosphate receptor activity involved in regulation of postsynaptic cytosolic calcium levels [GO:0098695]	1	0	0	1	1
	gluconolactonase activity [GO:0004341]	1	0	0	1	1
	pre-mRNA branch point binding [GO:0045131]	1	0	0	1	1
	C-rich single-stranded DNA binding [GO:1990829]	1	0	0	1	1
	isovaleryl-CoA dehydrogenase activity [GO:0008470]	1	0	0	1	1
	inositol 1,4,5-trisphosphate-sensitive calcium-release channel activity [GO:0005220]	3	0	0	1	1
	3-beta-hydroxy-delta5-steroid dehydrogenase activity [GO:0003854]	1	0	0	1	1
	inositol 1,4,5 trisphosphate binding [GO:0070679]	7	0	0	1	1
	3-beta-hydroxysteroid dehydrogenase/C4-decarboxylase activity [GO:0102175]	1	0	0	1	1
	4alpha-carboxy-4beta-methyl-5alpha-cholesta-8-en-3beta-ol:NAD(P)+ 3-oxidoreductase (decarboxylating) activity [GO:0103066]	1	0	0	1	1
	4alpha-carboxy-5alpha-cholesta-8-en-3beta-ol:NAD(P)+ 3-dehydrogenase (decarboxylating) activity [GO:0103067]	1	0	0	1	1
	inositol hexakisphosphate binding [GO:0000822]	3	0	0	1	1
	protein-glutamic acid ligase activity [GO:0070739]	1	0	0	1	1
	aryldialkylphosphatase activity [GO:0004063]	1	0	0	1	1
	acyl-L-homoserine-lactone lactonohydrolase activity [GO:0102007]	1	0	0	1	1
	U5 snRNA binding [GO:0030623]	2	0	0	1	1
	leucine-tRNA ligase activity [GO:0004823]	2	0	0	1	1
	anion:cation symporter activity [GO:0015296]	2	0	0	1	1
	ATP adenylyltransferase activity [GO:0003877]	1	0	0	1	1
	Wnt-activated receptor activity [GO:0042813]	9	0	0	1	1
	lysine-tRNA ligase activity [GO:0004824]	1	0	0	1	1
	intramolecular transferase activity, phosphotransferases [GO:0016868]	2	0	0	1	1
	transmembrane receptor protein tyrosine kinase adaptor activity [GO:0005068]	10	0	0	1	1
	uridine transmembrane transporter activity [GO:0015213]	2	0	0	1	1
	coreceptor activity [GO:0015026]	16	0	0	1	1
	L-serine transmembrane transporter activity [GO:0015194]	8	0	0	1	1
	phosphomevalonate kinase activity [GO:0004631]	1	0	0	1	1
	alpha-1,4-glucosidase activity [GO:0004558]	3	0	0	1	1
	3,4-dihydrocoumarin hydrolase activity [GO:0018733]	1	0	0	1	1
	glucan 1,4-alpha-glucosidase activity [GO:0004339]	1	0	0	1	1
	thiomorpholine-carboxylate dehydrogenase activity [GO:0047127]	1	0	0	1	1
	microfibril binding [GO:0050436]	1	0	0	1	1
	tetracycline transmembrane transporter activity [GO:0008493]	1	0	0	1	1
	glucan 1,3-alpha-glucosidase activity [GO:0033919]	1	0	0	1	1
	box H/ACA snoRNP complex binding [GO:0062065]	1	0	0	1	1
	purine nucleoside transmembrane transporter activity [GO:0015211]	2	0	0	1	1
	CDP-diacylglycerol-inositol 3-phosphatidyltransferase activity [GO:0003881]	1	0	0	1	1
	squalene monooxygenase activity [GO:0004506]	1	0	0	1	1
	adenosine receptor binding [GO:0031685]	1	0	0	1	1
	MAP kinase serine/threonine phosphatase activity [GO:1990439]	1	0	0	1	1
	S-methyl-5-thioadenosine phosphorylase activity [GO:0017061]	2	0	0	1	1
	receptor serine/threonine kinase binding [GO:0033612]	1	0	0	1	1
	methanethiol oxidase activity [GO:0018549]	1	0	0	1	1
	cGMP-dependent protein kinase activity [GO:0004692]	2	0	0	1	1
	Krueppel-associated box domain binding [GO:0035851]	2	0	0	1	1
	pantetheine-phosphate adenylyltransferase activity [GO:0004595]	1	0	0	1	1
	DNA/RNA helicase activity [GO:0033677]	2	0	0	1	1
	NAD(P)+ transhydrogenase (B-specific) activity [GO:0003957]	1	0	0	1	1
	NAD(P)+ transhydrogenase activity [GO:0008746]	1	0	0	1	1
	sedoheptulokinase activity [GO:0050277]	1	0	0	1	1
	interleukin-18 binding [GO:0042007]	1	0	0	1	1
	interleukin-18 receptor activity [GO:0042008]	1	0	0	1	1
	mannosyltransferase activity [GO:0000030]	12	0	0	1	1
	cis-trans isomerase activity [GO:0016859]	1	0	0	1	1
	oxygen binding [GO:0019825]	13	0	0	1	1
	delta3,5-delta2,4-dienoyl-CoA isomerase activity [GO:0051750]	1	0	0	1	1
	superoxide dismutase activity [GO:0004784]	3	0	0	1	1
	methyl indole-3-acetate esterase activity [GO:0080030]	2	0	0	1	1
	peptide N-acetyltransferase activity [GO:0034212]	2	0	0	1	1
	peptide-lysine-N-acetyltransferase activity [GO:0061733]	6	0	0	1	1
	protein propionyltransferase activity [GO:0061920]	1	0	0	1	1
	structural molecule activity conferring elasticity [GO:0097493]	1	0	0	1	1
	retinal binding [GO:0016918]	7	0	0	1	1
	alpha-1,6-mannosylglycoprotein 2-beta-N-acetylglucosaminyltransferase activity [GO:0008455]	1	0	0	1	1
	monosialoganglioside sialyltransferase activity [GO:0047288]	3	0	0	1	1
	N-acetyllactosaminide alpha-2,3-sialyltransferase activity [GO:0008118]	1	0	0	1	1
	neolactotetraosylceramide alpha-2,3-sialyltransferase activity [GO:0004513]	1	0	0	1	1
	large conductance calcium-activated potassium channel activity [GO:0060072]	1	0	0	1	1
	sphingomyelin phosphodiesterase activator activity [GO:0016230]	2	0	0	1	1
	proton-dependent oligopeptide secondary active transmembrane transporter activity [GO:0005427]	1	0	0	1	1
	dihydropyrimidine dehydrogenase (NADP+) activity [GO:0017113]	1	0	0	1	1
	uracil binding [GO:0002058]	1	0	0	1	1
	hyaluronoglucuronidase activity [GO:0033906]	1	0	0	1	1
	receptor signaling protein tyrosine kinase inhibitor activity [GO:0030294]	1	0	0	1	1
	arylsulfatase activity [GO:0004065]	11	0	0	1	1
	MutSalpha complex binding [GO:0032407]	5	0	0	1	1
	calcium-induced calcium release activity [GO:0048763]	2	0	0	1	1
	voltage-gated cation channel activity [GO:0022843]	2	0	0	1	1
	NEDD8 activating enzyme activity [GO:0019781]	2	0	0	1	1
	C-3 sterol dehydrogenase (C-4 sterol decarboxylase) activity [GO:0000252]	1	0	0	1	1
	methylglutaconyl-CoA hydratase activity [GO:0004490]	1	0	0	1	1
	activin receptor activity, type II [GO:0016362]	1	0	0	1	1
	isopentenyl-diphosphate delta-isomerase activity [GO:0004452]	1	0	0	1	1
	microtubule plus end polymerase [GO:0061863]	1	0	0	1	1
	interleukin-18 receptor binding [GO:0045515]	1	0	0	1	1
	propionate-CoA ligase activity [GO:0050218]	4	0	0	1	1
	3'-flap-structured DNA binding [GO:0070337]	1	0	0	1	1
	butyrate-CoA ligase activity [GO:0047760]	4	0	0	1	1
	translation release factor activity, codon nonspecific [GO:0016150]	1	0	0	1	1
	3-phosphoinositide-dependent protein kinase binding [GO:0043423]	1	0	0	1	1
	NMDA glutamate receptor activity [GO:0004972]	1	0	0	1	1
	Fas-activated serine/threonine kinase activity [GO:0033867]	1	0	0	1	1
	guanidinoacetate N-methyltransferase activity [GO:0030731]	1	0	0	1	1
	UDP-glucose 4-epimerase activity [GO:0003978]	1	0	0	1	1
	UDP-N-acetylglucosamine 4-epimerase activity [GO:0003974]	1	0	0	1	1
	N-box binding [GO:0071820]	1	0	0	1	1
	alkylglycerophosphoethanolamine phosphodiesterase activity [GO:0047391]	1	0	0	1	1
	nucleoside transmembrane transporter activity [GO:0005337]	3	0	0	1	1
	neuromedin U receptor binding [GO:0042922]	1	0	0	1	1
	tRNA demethylase activity [GO:1990984]	2	0	0	1	1
	inositol tetrakisphosphate 1-kinase activity [GO:0047325]	1	0	0	1	1
	inositol tetrakisphosphate 6-kinase activity [GO:0000825]	2	0	0	1	1
	inositol-1,3,4-trisphosphate 5-kinase activity [GO:0052726]	1	0	0	1	1
	inositol-1,3,4-trisphosphate 6-kinase activity [GO:0052725]	1	0	0	1	1
	lipid kinase activity [GO:0001727]	4	0	0	1	1
	melatonin receptor activity [GO:0008502]	1	0	0	1	1
	H4K20me3 modified histone binding [GO:1990889]	2	0	0	1	1
	dolichyl-phosphate-mannose-protein mannosyltransferase activity [GO:0004169]	7	0	0	1	1
	GDP-4-dehydro-D-rhamnose reductase activity [GO:0042356]	1	0	0	1	1
	GDP-L-fucose synthase activity [GO:0050577]	1	0	0	1	1
	GDP-mannose 3,5-epimerase activity [GO:0047918]	1	0	0	1	1
	hedgehog family protein binding [GO:0097108]	2	0	0	1	1
	hedgehog receptor activity [GO:0008158]	1	0	0	1	1
	smoothened binding [GO:0005119]	2	0	0	1	1
	methylcytosine dioxygenase activity [GO:0070579]	3	0	0	1	1
	oxidative DNA demethylase activity [GO:0035516]	4	0	0	1	1
	type 2 neuromedin U receptor binding [GO:0031840]	1	0	0	1	1
	type 1 neuromedin U receptor binding [GO:0031839]	1	0	0	1	1
	itaconyl-CoA hydratase activity [GO:0050011]	1	0	0	1	1
	exon-exon junction complex binding [GO:1990448]	1	0	0	1	1
	butyryl-CoA dehydrogenase activity [GO:0004085]	2	0	0	1	1
	choline transmembrane transporter activity [GO:0015220]	4	0	0	1	1
	voltage-gated ion channel activity [GO:0005244]	14	0	0	1	1
	epinephrine binding [GO:0051379]	1	0	0	1	1
	guanyl ribonucleotide binding [GO:0032561]	1	0	0	1	1
	potassium channel activity [GO:0005267]	6	0	0	1	1
	SMC family protein binding [GO:0043221]	1	0	0	1	1
	iodide transmembrane transporter activity [GO:0015111]	1	0	0	1	1
	nitrite reductase activity [GO:0098809]	2	0	0	1	1
	1-acylglycerophosphoethanolamine O-acyltransferase activity [GO:0106262]	4	0	0	1	1
	1-alkenylglycerophosphoethanolamine O-acyltransferase activity [GO:0047166]	1	0	0	1	1
	calcitonin receptor activity [GO:0004948]	2	0	0	1	1
	delayed rectifier potassium channel activity [GO:0005251]	7	0	0	1	1
	lysophospholipid acyltransferase activity [GO:0071617]	4	0	0	1	1
	cupric reductase activity [GO:0008823]	2	0	0	1	1
	ferric-chelate reductase (NADPH) activity [GO:0052851]	2	0	0	1	1
	oxidoreductase activity, acting on metal ions, NAD or NADP as acceptor [GO:0016723]	2	0	0	1	1
	1-acylglycerophosphoserine O-acyltransferase activity [GO:0106263]	4	0	0	1	1
	transposase activity [GO:0004803]	2	0	0	1	1
	RNA adenylyltransferase activity [GO:1990817]	4	0	0	1	1
	long-chain fatty acid omega-hydroxylase activity [GO:0102033]	3	0	0	1	1
	adenylate cyclase activator activity [GO:0010856]	3	0	0	1	1
	TSC1-TSC2 complex binding [GO:0062078]	1	0	0	1	1
	GTP-dependent protein kinase activity [GO:0034211]	1	0	0	1	1
	peroxidase inhibitor activity [GO:0036479]	1	0	0	1	1
	tubulin N-acetyltransferase activity [GO:0019799]	1	0	0	1	1
	glycoprotein endo-alpha-1,2-mannosidase activity [GO:0004569]	1	0	0	1	1
	bile acid:sodium symporter activity [GO:0008508]	2	0	0	1	1
	hydroxypyruvate isomerase activity [GO:0008903]	1	0	0	1	1
	MHC protein binding [GO:0042287]	2	0	0	1	1
	all-trans-decaprenyl-diphosphate synthase activity [GO:0097269]	2	0	0	1	1
	trans-hexaprenyltranstransferase activity [GO:0000010]	2	0	0	1	1
	trans-octaprenyltranstransferase activity [GO:0050347]	2	0	0	1	1
	gluconokinase activity [GO:0046316]	1	0	0	1	1
	opioid growth factor receptor activity [GO:0140625]	2	0	0	1	1
	16-hydroxypalmitate dehydrogenase activity [GO:0103002]	1	0	0	1	1
	arachidonic acid monooxygenase activity [GO:0008391]	2	0	0	1	1
	laurate hydroxylase activity [GO:0102116]	1	0	0	1	1
	heparan-alpha-glucosaminide N-acetyltransferase activity [GO:0015019]	1	0	0	1	1
	RNA lariat debranching enzyme activator activity [GO:0061632]	1	0	0	1	1
	N6-mAMP deaminase activity [GO:0062154]	1	0	0	1	1
	lysophosphatidic acid receptor activity [GO:0070915]	3	0	0	1	1
	acylpyruvate hydrolase activity [GO:0047621]	1	0	0	1	1
	fumarylpyruvate hydrolase activity [GO:0034545]	1	0	0	1	1
	regulatory region RNA binding [GO:0001069]	2	0	0	1	1
	glucose-1,6-bisphosphate synthase activity [GO:0047933]	1	0	0	1	1
	galactosylceramidase activity [GO:0004336]	1	0	0	1	1
	ubiquitin-like protein binding [GO:0032182]	5	0	0	1	1
	retinol binding [GO:0019841]	8	0	0	1	1
	5'-3' RNA polymerase activity [GO:0034062]	2	0	0	1	1
	adenylyltransferase activity [GO:0070566]	1	0	0	1	1
	5'-3' exodeoxyribonuclease activity [GO:0035312]	4	0	0	1	1
	sphingosine hydroxylase activity [GO:0000170]	1	0	0	1	1
	N(1),N(12)-diacetylspermine:oxygen oxidoreductase (3-acetamidopropanal-forming) activity [GO:0052899]	1	0	0	1	1
	N1-acetylspermidine:oxygen oxidoreductase (3-acetamidopropanal-forming) activity [GO:0052904]	1	0	0	1	1
	N1-acetylspermine:oxygen oxidoreductase (3-acetamidopropanal-forming) activity [GO:0052903]	1	0	0	1	1
	polyamine oxidase activity [GO:0046592]	2	0	0	1	1
	spermidine:oxygen oxidoreductase (3-aminopropanal-forming) activity [GO:0052902]	1	0	0	1	1
	spermine:oxygen oxidoreductase (spermidine-forming) activity [GO:0052901]	2	0	0	1	1
	acetylpyruvate hydrolase activity [GO:0018773]	1	0	0	1	1
	beta-catenin destruction complex binding [GO:1904713]	2	0	0	1	1
	ABC-type oligopeptide transporter activity [GO:0015421]	1	0	0	1	1
	tRNA (cytosine) methyltransferase activity [GO:0016427]	1	0	0	1	1
	NAD+ synthase (glutamine-hydrolyzing) activity [GO:0003952]	1	0	0	1	1
	acylglycerone-phosphate reductase activity [GO:0000140]	1	0	0	1	1
	rRNA (guanosine-2'-O-)-methyltransferase activity [GO:0070039]	2	0	0	1	1
	N-acetylphosphatidylethanolamine-hydrolysing phospholipase activity [GO:0102200]	1	0	0	1	1
	oligoribonucleotidase activity [GO:0034611]	1	0	0	1	1
	N-acetyl-beta-glucosaminyl-glycoprotein 4-beta-N-acetylgalactosaminyltransferase activity [GO:0033842]	2	0	0	1	1
	GPI-mannose ethanolamine phosphate phosphodiesterase activity [GO:0062050]	1	0	0	1	1
	cytosine C-5 DNA demethylase activity [GO:0051747]	1	0	0	1	1
	DNA-N1-methyladenine dioxygenase activity [GO:0043734]	3	0	0	1	1
	volume-sensitive anion channel activity [GO:0005225]	4	0	0	1	1
	all-trans-retinol 13,14-reductase activity [GO:0051786]	1	0	0	1	1
	3-hydroxyisobutyryl-CoA hydrolase activity [GO:0003860]	1	0	0	1	1
	growth hormone-releasing hormone receptor activity [GO:0016520]	1	0	0	1	1
	histone H3-methyl-arginine-2 demethylase activity [GO:0033746]	1	0	0	1	1
	histone H3-methyl-arginine-3 demethylase activity [GO:0033749]	2	0	0	1	1
	peptidyl-lysine 5-dioxygenase activity [GO:0070815]	1	0	0	1	1
	GPI anchor binding [GO:0034235]	4	0	0	1	1
	tRNA (cytosine-3-)-methyltransferase activity [GO:0052735]	3	0	0	1	1
	glutamate-tRNA(Gln) ligase activity [GO:0050561]	1	0	0	1	1
	2-octaprenyl-6-methoxy-1,4-benzoquinone methylase activity [GO:0043333]	1	0	0	1	1
	2-decaprenyl-6-methoxy-1,4-benzoquinone methyltransferase activity [GO:0043430]	1	0	0	1	1
	peptide butyryltransferase activity [GO:0140065]	2	0	0	1	1
	prostaglandin-I synthase activity [GO:0008116]	1	0	0	1	1
	2,4-dienoyl-CoA reductase (NADPH) activity [GO:0008670]	2	0	0	1	1
	3-hydroxykynureninase activity [GO:0061981]	1	0	0	1	1
	kynureninase activity [GO:0030429]	1	0	0	1	1
	ceramide glucosyltransferase activity [GO:0008120]	1	0	0	1	1
	dihydroceramide glucosyltransferase activity [GO:0102769]	1	0	0	1	1
	glutaminyl-peptide cyclotransferase activity [GO:0016603]	2	0	0	1	1
	hydroxyacylglutathione hydrolase activity [GO:0004416]	3	0	0	1	1
	lipase activity [GO:0016298]	9	0	0	1	1
	deoxyuridine phosphorylase activity [GO:0047847]	1	0	0	1	1
	uridine phosphorylase activity [GO:0004850]	1	0	0	1	1
	adenylate cyclase activity [GO:0004016]	5	0	0	1	1
	aliphatic-amine oxidase activity [GO:0052595]	1	0	0	1	1
	aminoacetone:oxygen oxidoreductase(deaminating) activity [GO:0052594]	1	0	0	1	1
	phenethylamine:oxygen oxidoreductase (deaminating) activity [GO:0052596]	1	0	0	1	1
	tryptamine:oxygen oxidoreductase (deaminating) activity [GO:0052593]	1	0	0	1	1
	myosin head/neck binding [GO:0032028]	1	0	0	1	1
	ATPase-coupled ion transmembrane transporter activity [GO:0042625]	1	0	0	1	1
	leukemia inhibitory factor receptor binding [GO:0005146]	1	0	0	1	1
	adrenomedullin receptor activity [GO:0001605]	1	0	0	1	1
	kinase activator activity [GO:0019209]	3	0	0	1	1
	GMP binding [GO:0019002]	2	0	0	1	1
	C-4 methylsterol oxidase activity [GO:0000254]	1	0	0	1	1
	ATP-activated inward rectifier potassium channel activity [GO:0015272]	1	0	0	1	1
	hemi-methylated DNA-binding [GO:0044729]	2	0	0	1	1
	sterol esterase activity [GO:0004771]	5	0	0	1	1
	electron-transferring-flavoprotein dehydrogenase activity [GO:0004174]	2	0	0	1	1
	UDP-N-acetylgalactosamine diphosphorylase activity [GO:0052630]	1	0	0	1	1
	UDP-N-acetylglucosamine diphosphorylase activity [GO:0003977]	2	0	0	1	1
	dipeptide transmembrane transporter activity [GO:0071916]	2	0	0	1	1
	peptide:proton symporter activity [GO:0015333]	2	0	0	1	1
	glucuronosyl-N-acetylglucosaminyl-proteoglycan 4-alpha-N-acetylglucosaminyltransferase activity [GO:0050508]	2	0	0	1	1
	heparan sulfate N-acetylglucosaminyltransferase activity [GO:0042328]	2	0	0	1	1
	N-acetylglucosaminyl-proteoglycan 4-beta-glucuronosyltransferase activity [GO:0050509]	2	0	0	1	1
	blue light photoreceptor activity [GO:0009882]	2	0	0	1	1
	acetylcholine transmembrane transporter activity [GO:0005277]	1	0	0	1	1
	adrenomedullin binding [GO:1990409]	1	0	0	1	1
	BH domain binding [GO:0051400]	3	0	0	1	1
	sterol-4-alpha-carboxylate 3-dehydrogenase (decarboxylating) activity [GO:0047012]	1	0	0	1	1
	cysteine dioxygenase activity [GO:0017172]	1	0	0	1	1
	N-acylsphingosine galactosyltransferase activity [GO:0047263]	1	0	0	1	1
	calcium-dependent protein serine/threonine phosphatase activity [GO:0004723]	3	0	0	1	1
	methylbutanoate-CoA ligase activity [GO:0043759]	1	0	0	1	1
	propionate CoA-transferase activity [GO:0018729]	1	0	0	1	1
	3-oxo-arachidoyl-CoA reductase activity [GO:0102339]	1	0	0	1	1
	3-oxo-behenoyl-CoA reductase activity [GO:0102340]	1	0	0	1	1
	3-oxo-cerotoyl-CoA reductase activity [GO:0102342]	1	0	0	1	1
	3-oxo-lignoceroyl-CoA reductase activity [GO:0102341]	1	0	0	1	1
	long-chain-fatty-acyl-CoA reductase activity [GO:0050062]	1	0	0	1	1
	acylglycerol kinase activity [GO:0047620]	1	0	0	1	1
	ceramide kinase activity [GO:0001729]	2	0	0	1	1
	dihydroceramide kinase activity [GO:0102773]	2	0	0	1	1
	tRNA 4-demethylwyosine alpha-amino-alpha-carboxypropyltransferase activity [GO:0102522]	1	0	0	1	1
	single-strand selective uracil DNA N-glycosylase activity [GO:0017065]	1	0	0	1	1
	oxidoreductase activity, acting on metal ions [GO:0016722]	2	0	0	1	1
	histone reader [GO:0140566]	1	0	0	1	1
	sucrose:proton symporter activity [GO:0008506]	1	0	0	1	1
	CP2 mannose-ethanolamine phosphotransferase activity [GO:0051267]	1	0	0	1	1
	malonyl-CoA synthetase activity [GO:0090409]	1	0	0	1	1
	2-hydroxyacylsphingosine 1-beta-galactosyltransferase activity [GO:0003851]	1	0	0	1	1
	acid-thiol ligase activity [GO:0016878]	2	0	0	1	1
	all-trans retinol 3,4-desaturase activity [GO:0061896]	1	0	0	1	1
	NADPH peroxidase activity [GO:0050137]	1	0	0	1	1
	NuRD complex binding [GO:0120325]	3	0	0	1	1
	GDP-Man:Man3GlcNAc2-PP-Dol alpha-1,2-mannosyltransferase activity [GO:0004377]	1	0	0	1	1
	lipid transfer activity [GO:0120013]	3	0	0	1	1
	sodium:bicarbonate symporter activity [GO:0008510]	3	0	0	1	1
	protein-glucosylgalactosylhydroxylysine glucosidase activity [GO:0047402]	1	0	0	1	1
	CDP-diacylglycerol-glycerol-3-phosphate 3-phosphatidyltransferase activity [GO:0008444]	1	0	0	1	1
	procollagen-proline 3-dioxygenase activity [GO:0019797]	3	0	0	1	1
	tRNA (guanine(37)-N(1))-methyltransferase activity [GO:0052906]	1	0	0	1	1
	2',3'-cyclic-nucleotide 2'-phosphodiesterase activity [GO:0008663]	1	0	0	1	1
	CDP-glycerol diphosphatase activity [GO:0047734]	1	0	0	1	1
	aminophospholipid flippase activity [GO:0015247]	2	0	0	1	1
	UDP-N-acetylglucosamine-lysosomal-enzyme N-acetylglucosaminephosphotransferase activity [GO:0003976]	3	0	0	1	1
	11-cis retinal binding [GO:0005502]	1	0	0	1	1
	11-cis-retinal 3,4-desaturase activity [GO:0061899]	1	0	0	1	1
	all-trans retinal 3,4-desaturase activity [GO:0061897]	1	0	0	1	1
	all-trans retinoic acid 3,4-desaturase activity [GO:0061898]	1	0	0	1	1
	all-trans-retinol binding [GO:1904768]	1	0	0	1	1
	peptide 2-hydroxyisobutyryltransferase activity [GO:0106226]	1	0	0	1	1
	single-stranded DNA 3'-5' exodeoxyribonuclease activity [GO:0008310]	3	0	0	1	1
	histone lactyltransferase activity [GO:0120301]	1	0	0	1	1
	DNA hairpin binding [GO:0032448]	1	0	0	1	1
	cortisol dehydrogenase activity [GO:0102196]	1	0	0	1	1
	phosphogluconate dehydrogenase (decarboxylating) activity [GO:0004616]	1	0	0	1	1
	RNA polymerase II activity [GO:0001055]	1	0	0	1	1
	Rho GDP-dissociation inhibitor activity [GO:0005094]	2	0	0	1	1
	2-iminobutanoate deaminase activity [GO:0120242]	1	0	0	1	1
	2-iminopropanoate deaminase activity [GO:0120243]	1	0	0	1	1
	deaminase activity [GO:0019239]	2	0	0	1	1
	endoribonuclease activity, producing 3'-phosphomonoesters [GO:0016892]	1	0	0	1	1
	spermine synthase activity [GO:0016768]	1	0	0	1	1
	neurotrophin TRKB receptor binding [GO:0005169]	1	0	0	1	1
	neurotrophin TRKC receptor binding [GO:0005170]	1	0	0	1	1
	[heparan sulfate]-glucosamine N-sulfotransferase activity [GO:0015016]	2	0	0	1	1
	heparan sulfate N-deacetylase activity [GO:0102140]	1	0	0	1	1
	N-acetylglucosamine deacetylase activity [GO:0050119]	2	0	0	1	1
	trans-1,2-dihydrobenzene-1,2-diol dehydrogenase activity [GO:0047115]	2	0	0	1	1
	citrate secondary active transmembrane transporter activity [GO:0071913]	1	0	0	1	1
	AF-2 domain binding [GO:0050682]	4	0	0	1	1
	citrate transmembrane transporter activity [GO:0015137]	3	0	0	1	1
	voltage-gated potassium channel activity involved in ventricular cardiac muscle cell action potential repolarization [GO:1902282]	3	0	0	1	1
	voltage-gated potassium channel activity involved in atrial cardiac muscle cell action potential repolarization [GO:0086089]	1	0	0	1	1
	hydroperoxy icosatetraenoate isomerase activity [GO:0106255]	1	0	0	1	1
	linoleic acid epoxygenase activity [GO:0071614]	1	0	0	1	1
	N-acylglucosamine 2-epimerase activity [GO:0050121]	1	0	0	1	1
	FAT10 activating enzyme activity [GO:0019780]	1	0	0	1	1
	DNA-binding transcription repressor activity [GO:0001217]	7	0	0	1	1
	long-chain-alcohol oxidase activity [GO:0046577]	1	0	0	1	1
	long-chain-aldehyde dehydrogenase activity [GO:0050061]	1	0	0	1	1
	medium-chain-aldehyde dehydrogenase activity [GO:0052814]	1	0	0	1	1
	succinate-semialdehyde dehydrogenase (NAD+) activity [GO:0004777]	1	0	0	1	1
	peptidyl-dipeptidase inhibitor activity [GO:0060422]	1	0	0	1	1
	(3R)-hydroxyacyl-CoA dehydrogenase (NAD) activity [GO:0106386]	2	0	0	1	1
	3alpha,7alpha,12alpha-trihydroxy-5beta-cholest-24-enoyl-CoA hydratase activity [GO:0033989]	1	0	0	1	1
	molybdenum ion binding [GO:0030151]	4	0	0	1	1
	sulfite oxidase activity [GO:0008482]	1	0	0	1	1
	N-sulfoglucosamine sulfohydrolase activity [GO:0016250]	1	0	0	1	1
	alpha-2B adrenergic receptor binding [GO:0031695]	1	0	0	1	1
	alpha-2C adrenergic receptor binding [GO:0031696]	1	0	0	1	1
	voltage-gated potassium channel activity involved in cardiac muscle cell action potential repolarization [GO:0086008]	2	0	0	1	1
	tricarboxylic acid transmembrane transporter activity [GO:0015142]	1	0	0	1	1
	ATP citrate synthase activity [GO:0003878]	1	0	0	1	1
	succinate-CoA ligase (ADP-forming) activity [GO:0004775]	3	0	0	1	1
	glutamate 5-kinase activity [GO:0004349]	1	0	0	1	1
	glutamate-5-semialdehyde dehydrogenase activity [GO:0004350]	1	0	0	1	1
	ephrin receptor activity [GO:0005003]	5	0	0	1	1
	cation:chloride symporter activity [GO:0015377]	2	0	0	1	1
	metal ion transmembrane transporter activity [GO:0046873]	4	0	0	1	1
	potassium ion transmembrane transporter activity [GO:0015079]	2	0	0	1	1
	sodium:potassium:chloride symporter activity [GO:0008511]	1	0	0	1	1
	ceramide transfer activity [GO:0120017]	2	0	0	1	1
	cerebroside transfer activity [GO:0140340]	1	0	0	1	1
	diacylglyceride transfer activity [GO:0140337]	1	0	0	1	1
	phosphatidic acid transfer activity [GO:1990050]	3	0	0	1	1
	phosphatidylethanolamine transfer activity [GO:1904121]	2	0	0	1	1
	phosphatidylglycerol transfer activity [GO:0140339]	1	0	0	1	1
	phospholipid transfer activity [GO:0120014]	2	0	0	1	1
	very-low-density lipoprotein particle binding [GO:0034189]	3	0	0	1	1
	deubiquitinase activator activity [GO:0035800]	2	0	0	1	1
	K48-linked polyubiquitin modification-dependent protein binding [GO:0036435]	10	0	0	1	1
	transmembrane-ephrin receptor activity [GO:0005005]	13	0	0	1	1
	alpha-N-acetylglucosaminidase activity [GO:0004561]	1	0	0	1	1
	DH domain binding [GO:0097161]	1	0	0	1	1
	DNA damage sensor activity [GO:0140612]	2	0	0	1	1
	succinate-CoA ligase (GDP-forming) activity [GO:0004776]	3	0	0	1	1
	diphosphomevalonate decarboxylase activity [GO:0004163]	1	0	0	1	1
	holocytochrome-c synthase activity [GO:0004408]	1	0	0	1	1
	myo-inositol transmembrane transporter activity [GO:0005365]	2	0	0	1	1
	polyol transmembrane transporter activity [GO:0015166]	1	0	0	1	1
	calcium-dependent protein serine/threonine phosphatase regulator activity [GO:0008597]	3	0	0	1	1
	mevalonate transmembrane transporter activity [GO:0015130]	1	0	0	1	1
	organic cyclic compound binding [GO:0097159]	1	0	0	1	1
	arachidonic acid 5,6-epoxygenase activity [GO:0106301]	1	0	0	1	1
	MIT domain binding [GO:0090541]	3	0	0	1	1
	forked DNA-dependent helicase activity [GO:0061749]	2	0	0	1	1
	telomeric G-quadruplex DNA binding [GO:0061849]	2	0	0	1	1
	arginine-tRNA ligase activity [GO:0004814]	3	0	0	1	1
	potassium:chloride symporter activity [GO:0015379]	7	0	0	1	1
	single base insertion or deletion binding [GO:0032138]	1	0	0	1	1
	interleukin-8 receptor binding [GO:0005153]	1	0	0	1	1
	tyrosine-tRNA ligase activity [GO:0004831]	2	0	0	1	1
	ammonium transmembrane transporter activity [GO:0008519]	6	0	0	1	1
	DNA clamp loader activity [GO:0003689]	3	0	0	1	1
	thiopurine S-methyltransferase activity [GO:0008119]	1	0	0	1	1
	galactokinase activity [GO:0004335]	2	0	0	1	1
	MAP kinase phosphatase activity [GO:0033549]	1	0	0	1	1
	3-hydroxydecanoyl-[acyl-carrier-protein] dehydratase activity [GO:0008693]	1	0	0	1	1
	3-hydroxyoctanoyl-[acyl-carrier-protein] dehydratase activity [GO:0047451]	1	0	0	1	1
	3-hydroxypalmitoyl-[acyl-carrier-protein] dehydratase activity [GO:0004317]	1	0	0	1	1
	3-oxoacyl-[acyl-carrier-protein] reductase (NADPH) activity [GO:0004316]	2	0	0	1	1
	3-oxoacyl-[acyl-carrier-protein] synthase activity [GO:0004315]	2	0	0	1	1
	[acyl-carrier-protein] S-acetyltransferase activity [GO:0004313]	1	0	0	1	1
	[acyl-carrier-protein] S-malonyltransferase activity [GO:0004314]	2	0	0	1	1
	enoyl-[acyl-carrier-protein] reductase (NADPH, A-specific) activity [GO:0047117]	1	0	0	1	1
	fatty acid synthase activity [GO:0004312]	2	0	0	1	1
	myristoyl-[acyl-carrier-protein] hydrolase activity [GO:0016295]	1	0	0	1	1
	oleoyl-[acyl-carrier-protein] hydrolase activity [GO:0004320]	1	0	0	1	1
	palmitoyl-[acyl-carrier-protein] hydrolase activity [GO:0016296]	1	0	0	1	1
	phosphopantetheine binding [GO:0031177]	1	0	0	1	1
	fibronectin binding [GO:0001968]	26	0	0	1	1
	CAAX-protein geranylgeranyltransferase activity [GO:0004662]	2	0	0	1	1
	protein geranylgeranyltransferase activity [GO:0004661]	2	0	0	1	1
	deoxyhypusine synthase activity [GO:0034038]	1	0	0	1	1
	(3R)-hydroxymyristoyl-[acyl-carrier-protein] dehydratase activity [GO:0008659]	1	0	0	1	1
	vanadium ion transmembrane transporter activity [GO:0015100]	1	0	0	1	1
	transition metal ion transmembrane transporter activity [GO:0046915]	1	0	0	1	1
	nickel cation transmembrane transporter activity [GO:0015099]	1	0	0	1	1
	cuprous ion binding [GO:1903136]	8	0	0	1	1
	lanosterol synthase activity [GO:0000250]	1	0	0	1	1
	cupric ion binding [GO:1903135]	4	0	0	1	1
	glutathione synthase activity [GO:0004363]	1	0	0	1	1
	ATP-dependent protein binding [GO:0043008]	7	0	0	1	1
	glucosyltransferase activity [GO:0046527]	6	0	0	1	1
	calcium-dependent protein serine/threonine kinase activity [GO:0009931]	6	0	0	1	1
	dolichyl-phosphate-glucose-glycolipid alpha-glucosyltransferase activity [GO:0004583]	2	0	0	1	1
	extracellular matrix binding [GO:0050840]	19	0	0	1	1
	1-pyrroline dehydrogenase activity [GO:0033737]	1	0	0	1	1
	ribose-5-phosphate isomerase activity [GO:0004751]	1	0	0	1	1
	cadmium ion transmembrane transporter activity [GO:0015086]	3	0	0	1	1
	dolichyl pyrophosphate Man9GlcNAc2 alpha-1,3-glucosyltransferase activity [GO:0042281]	1	0	0	1	1
	deacetylase activity [GO:0019213]	12	0	0	1	1
	ADP-ribosylglutamate hydrolase activity [GO:0140293]	3	0	0	1	1
	iron ion transmembrane transporter activity [GO:0005381]	6	0	0	1	1
	lead ion transmembrane transporter activity [GO:0015094]	1	0	0	1	1
	superoxide-generating NADPH oxidase activator activity [GO:0016176]	4	0	0	1	1
	4-trimethylammoniobutyraldehyde dehydrogenase activity [GO:0047105]	1	0	0	1	1
	ceramide 1-phosphate transfer activity [GO:1902388]	5	0	0	1	1
	acetolactate synthase activity [GO:0003984]	1	0	0	1	1
	choline-phosphate cytidylyltransferase activity [GO:0004105]	2	0	0	1	1
	5-formyltetrahydrofolate cyclo-ligase activity [GO:0030272]	1	0	0	1	1
	GMP synthase (glutamine-hydrolyzing) activity [GO:0003922]	1	0	0	1	1
	GMP synthase activity [GO:0003921]	1	0	0	1	1
	ketohexokinase activity [GO:0004454]	1	0	0	1	1
	histamine N-methyltransferase activity [GO:0046539]	1	0	0	1	1
	oxygen-dependent protoporphyrinogen oxidase activity [GO:0004729]	1	0	0	1	1
	palmitoleoyltransferase activity [GO:1990698]	1	0	0	1	1
	GARP complex binding [GO:0062069]	1	0	0	1	1
	bis(5'-nucleosyl)-tetraphosphatase (symmetrical) activity [GO:0008803]	1	0	0	1	1
	biotin-[acetyl-CoA-carboxylase] ligase activity [GO:0004077]	1	0	0	1	1
	biotin-[methylcrotonoyl-CoA-carboxylase] ligase activity [GO:0004078]	1	0	0	1	1
	biotin-[methylmalonyl-CoA-carboxytransferase] ligase activity [GO:0004079]	1	0	0	1	1
	biotin-[propionyl-CoA-carboxylase (ATP-hydrolyzing)] ligase activity [GO:0004080]	1	0	0	1	1
	biotin-protein ligase activity [GO:0018271]	1	0	0	1	1
	thiolester hydrolase activity [GO:0016790]	2	0	0	1	1
	ubiquitin activating enzyme activity [GO:0004839]	3	0	0	1	1
	death domain binding [GO:0070513]	4	0	0	1	1
	UDP-D-xylose:beta-D-glucoside alpha-1,3-D-xylosyltransferase activity [GO:0140563]	2	0	0	1	1
	nucleoside phosphotransferase activity [GO:0050146]	1	0	0	1	1
	IMP 5'-nucleotidase activity [GO:0050483]	3	0	0	1	1
	GMP 5'-nucleotidase activity [GO:0050484]	1	0	0	1	1
	alanine-tRNA ligase activity [GO:0004813]	3	0	0	1	1
	Ser-tRNA(Ala) hydrolase activity [GO:0002196]	2	0	0	1	1
	phospholipid scramblase activity [GO:0017128]	10	0	0	1	1
	intracellular calcium activated chloride channel activity [GO:0005229]	10	0	0	1	1
	hydrolase activity, hydrolyzing N-glycosyl compounds [GO:0016799]	2	0	0	1	1
	mannosyl-oligosaccharide 1,3-1,6-alpha-mannosidase activity [GO:0004572]	2	0	0	1	1
	DNA primase activity [GO:0003896]	1	0	0	1	1
	ribonucleotide binding [GO:0032553]	1	0	0	1	1
	inositol-1,4-bisphosphate 1-phosphatase activity [GO:0004441]	1	0	0	1	1
	DNA/RNA hybrid binding [GO:0071667]	1	0	0	1	1
	very-long-chain-acyl-CoA dehydrogenase activity [GO:0017099]	4	0	0	1	1
	chloride channel activity [GO:0005254]	19	0	0	1	1
	UDP-xylosyltransferase activity [GO:0035252]	8	0	0	1	1
	adenylylsulfatase activity [GO:0047627]	1	0	0	1	1
	adenylylsulfate-ammonia adenylyltransferase activity [GO:0047352]	1	0	0	1	1
	bis(5'-adenosyl)-triphosphatase activity [GO:0047710]	2	0	0	1	1
	estrone sulfotransferase activity [GO:0004304]	1	0	0	1	1
	flavonol 3-sulfotransferase activity [GO:0047894]	3	0	0	1	1
	RNA polymerase I transcription regulatory region sequence-specific DNA binding [GO:0001163]	1	0	0	1	1
	triglyceride transfer activity [GO:0140344]	1	0	0	1	1
	TORC2 complex binding [GO:1904841]	2	0	0	1	1
	adenosine kinase activity [GO:0004001]	1	0	0	1	1
	oxoglutarate:malate antiporter activity [GO:0015367]	1	0	0	1	1
	D5 dopamine receptor binding [GO:0031752]	2	0	0	1	1
	inward rectifier potassium channel inhibitor activity [GO:0070320]	1	0	0	1	1
	transforming growth factor beta receptor activity, type III [GO:0070123]	1	0	0	1	1
	linoleic acid binding [GO:0070539]	1	0	0	1	1
	6-pyruvoyltetrahydropterin synthase activity [GO:0003874]	1	0	0	1	1
	urokinase plasminogen activator receptor activity [GO:0030377]	1	0	0	1	1
	glycosaminoglycan binding [GO:0005539]	19	0	0	1	1
	ABC-type peptide antigen transporter activity [GO:0015433]	2	0	0	1	1
	ABC-type peptide transporter activity [GO:0015440]	3	0	0	1	1
	peptide transmembrane transporter activity [GO:1904680]	2	0	0	1	1
	TAP1 binding [GO:0046978]	2	0	0	1	1
	TAP2 binding [GO:0046979]	1	0	0	1	1
	K6-linked polyubiquitin modification-dependent protein binding [GO:0071796]	2	0	0	1	1
	proteasome regulatory particle binding [GO:1904855]	1	0	0	1	1
	1,4-alpha-glucan branching enzyme activity [GO:0003844]	1	0	0	1	1
	1,4-alpha-glucan branching enzyme activity (using a glucosylated glycogenin as primer for glycogen synthesis) [GO:0102752]	1	0	0	1	1
	beta-1,3-galactosyl-O-glycosyl-glycoprotein beta-1,6-N-acetylglucosaminyltransferase activity [GO:0003829]	1	0	0	1	1
	leptomycin B binding [GO:1901707]	1	0	0	1	1
	3-hydroxybutyrate dehydrogenase activity [GO:0003858]	2	0	0	1	1
	methylmalonate-semialdehyde dehydrogenase (acylating) activity [GO:0004491]	1	0	0	1	1
	voltage-gated sodium channel activity [GO:0005248]	6	0	0	1	1
	N-acetylgalactosamine kinase activity [GO:0033858]	1	0	0	1	1
	chitin binding [GO:0008061]	2	0	0	1	1
	chitinase activity [GO:0004568]	1	0	0	1	1
	L-tryptophan transmembrane transporter activity [GO:0015196]	2	0	0	1	1
	exoribonuclease activity [GO:0004532]	5	0	0	1	1
	P-type calcium transporter activity involved in regulation of postsynaptic cytosolic calcium ion concentration [GO:1905059]	1	0	0	1	1
	heteroduplex DNA loop binding [GO:0000404]	1	0	0	1	1
	superoxide dismutase copper chaperone activity [GO:0016532]	2	0	0	1	1
	hydroperoxy icosatetraenoate dehydratase activity [GO:0106256]	3	0	0	1	1
	N-(long-chain-acyl)ethanolamine deacylase activity [GO:0047412]	1	0	0	1	1
	N-acylsphingosine amidohydrolase activity [GO:0017040]	2	0	0	1	1
	dihydroorotate dehydrogenase activity [GO:0004152]	1	0	0	1	1
	12-hydroxyheptadecatrienoic acid synthase activity [GO:0036134]	3	0	0	1	1
	transforming growth factor beta-activated receptor activity [GO:0005024]	8	0	0	1	1
	transforming growth factor beta binding [GO:0050431]	17	0	0	1	1
	malonate-semialdehyde dehydrogenase (acetylating) activity [GO:0018478]	1	0	0	1	1
	malonate-semialdehyde dehydrogenase (acetylating, NAD+) activity [GO:0102662]	1	0	0	1	1
	ceramidase activity [GO:0102121]	2	0	0	1	1
	mRNA binding involved in posttranscriptional gene silencing [GO:1903231]	2	0	0	1	1
	lactoylglutathione lyase activity [GO:0004462]	1	0	0	1	1
	3beta-hydroxy-5beta-steroid dehydrogenase activity [GO:0033703]	1	0	0	1	1
	single-stranded 3'-5' DNA helicase activity [GO:1990518]	2	0	0	1	1
	triplex DNA binding [GO:0045142]	2	0	0	1	1
	interleukin-10 receptor activity [GO:0004920]	1	0	0	1	1
	protein tyrosine kinase collagen receptor activity [GO:0038062]	2	0	0	1	1
	sodium:phosphate symporter activity [GO:0005436]	2	0	0	1	1
	pseudouridine 5'-phosphatase activity [GO:1990738]	1	0	0	1	1
	retinol transmembrane transporter activity [GO:0034632]	2	0	0	1	1
	benzoate-CoA ligase activity [GO:0018858]	1	0	0	1	1
	CoA-ligase activity [GO:0016405]	2	0	0	1	1
	decanoate-CoA ligase activity [GO:0102391]	1	0	0	1	1
	fatty acid ligase activity [GO:0015645]	2	0	0	1	1
	fatty-acyl-CoA synthase activity [GO:0004321]	2	0	0	1	1
	mRNA (cytidine-5-)-methyltransferase activity [GO:0062152]	1	0	0	1	1
	myosin phosphatase regulator activity [GO:0017020]	3	0	0	1	1
	alpha-1,6-mannosylglycoprotein 6-beta-N-acetylglucosaminyltransferase activity [GO:0030144]	2	0	0	1	1
	histone butyryltransferase activity [GO:0140069]	1	0	0	1	1
	histone crotonyltransferase activity [GO:0140068]	1	0	0	1	1
	RISC complex binding [GO:1905172]	3	0	0	1	1
	3'-5' DNA/RNA helicase activity [GO:0033679]	1	0	0	1	1
	vitamin D 25-hydroxylase activity [GO:0070643]	1	0	0	1	1
	25-hydroxycholecalciferol-24-hydroxylase activity [GO:0008403]	1	0	0	1	1
	androsterone dehydrogenase (B-specific) activity [GO:0047042]	1	0	0	1	1
	testosterone dehydrogenase [NAD(P)] activity [GO:0030283]	2	0	0	1	1
	1,2-diacylglycerol acylhydrolase activity [GO:0102259]	1	0	0	1	1
	1,3-diacylglycerol acylhydrolase activity [GO:0102258]	1	0	0	1	1
	tetrahydrofolylpolyglutamate synthase activity [GO:0004326]	1	0	0	1	1
	3-dehydrosphinganine reductase activity [GO:0047560]	1	0	0	1	1
	amidophosphoribosyltransferase activity [GO:0004044]	1	0	0	1	1
	bile-salt sulfotransferase activity [GO:0047704]	1	0	0	1	1
	17-alpha,20-alpha-dihydroxypregn-4-en-3-one dehydrogenase activity [GO:0047006]	1	0	0	1	1
	DNA strand exchange activity [GO:0000150]	2	0	0	1	1
	adrenergic receptor binding [GO:0031690]	1	0	0	1	1
	kininogen binding [GO:0030984]	1	0	0	1	1
	angiotensin type II receptor activity [GO:0004945]	1	0	0	1	1
	glutathione specific gamma-glutamylcyclotransferase activity [GO:0061928]	2	0	0	1	1
	gamma-glutamylcyclotransferase activity [GO:0003839]	3	0	0	1	1
	1-alpha,25-dihydroxyvitamin D3 23-hydroxylase activity [GO:0062181]	1	0	0	1	1
	1-alpha,25-dihydroxyvitamin D3 24-hydroxylase activity [GO:0030342]	1	0	0	1	1
	25-hydroxycholecalciferol-23-hydroxylase activity [GO:0062180]	1	0	0	1	1
	RNA-directed 5'-3' RNA polymerase activity [GO:0003968]	2	0	0	1	1
	lysine N-acetyltransferase activity, acting on acetyl phosphate as donor [GO:0004468]	4	0	0	1	1
	calmodulin-dependent cyclic-nucleotide phosphodiesterase activity [GO:0004117]	2	0	0	1	1
	(N-acetylneuraminyl)-galactosylglucosylceramide N-acetylgalactosaminyltransferase activity [GO:0003947]	1	0	0	1	1
	C-C chemokine binding [GO:0019957]	1	0	0	1	1
	C-C chemokine receptor activity [GO:0016493]	1	0	0	1	1
	C-X-C chemokine receptor activity [GO:0016494]	1	0	0	1	1
	C-X-C motif chemokine 12 receptor activity [GO:0038147]	1	0	0	1	1
	S-(hydroxymethyl)glutathione dehydrogenase activity [GO:0051903]	2	0	0	1	1
	Rho GDP-dissociation inhibitor binding [GO:0051022]	2	0	0	1	1
	signal sequence binding [GO:0005048]	4	0	0	1	1
	myosin-light-chain-phosphatase activity [GO:0050115]	1	0	0	1	1
	calcium sensitive guanylate cyclase activator activity [GO:0008048]	1	0	0	1	1
	thyrotropin-releasing hormone receptor binding [GO:0031531]	1	0	0	1	1
	U6 snRNA 3'-end binding [GO:0030629]	2	0	0	1	1
	U7 snRNA binding [GO:0071209]	3	0	0	1	1
	translation release factor activity, codon specific [GO:0016149]	1	0	0	1	1
	translation termination factor activity [GO:0008079]	1	0	0	1	1
	oxidoreductase activity, acting on the aldehyde or oxo group of donors, NAD or NADP as acceptor [GO:0016620]	2	0	0	1	1
	macrolide binding [GO:0005527]	1	0	0	1	1
	NADPH:quinone reductase activity [GO:0003960]	4	0	0	1	1
	purine ribonucleoside triphosphate binding [GO:0035639]	1	0	0	1	1
	phosphatidylinositol-3,4-bisphosphate 3-phosphatase activity [GO:0051800]	1	0	0	1	1
	phosphatidylinositol-3,4,5-trisphosphate 3-phosphatase activity [GO:0016314]	3	0	0	1	1
	inositol-1,3,4,5-tetrakisphosphate 3-phosphatase activity [GO:0051717]	2	0	0	1	1
	acylglycerol lipase activity [GO:0047372]	11	0	0	1	1
	adiponectin binding [GO:0055100]	3	0	0	1	1
	progesterone receptor binding [GO:0033142]	2	0	0	1	1
	box C/D RNA binding [GO:0034512]	2	0	0	1	1
	U4atac snRNA binding [GO:0030622]	3	0	0	1	1
	3-oxoacid CoA-transferase activity [GO:0008260]	1	0	0	1	1
	CoA-transferase activity [GO:0008410]	1	0	0	1	1
	neurotrophin receptor activity [GO:0005030]	2	0	0	1	1
	F-box domain binding [GO:1990444]	2	0	0	1	1
	methionine-tRNA ligase activity [GO:0004825]	2	0	0	1	1
	3-keto sterol reductase activity [GO:0000253]	3	0	0	1	1
	cycloeucalenone reductase activity [GO:0102176]	2	0	0	1	1
	AP-3 adaptor complex binding [GO:0035651]	3	0	0	1	1
	BLOC-2 complex binding [GO:0036461]	2	0	0	1	1
	sulfiredoxin activity [GO:0032542]	2	0	0	1	1
	cysteine-type endopeptidase regulator activity involved in apoptotic process [GO:0043028]	1	0	0	1	1
	methylglyoxal synthase activity [GO:0008929]	1	0	0	1	1
	triose-phosphate isomerase activity [GO:0004807]	1	0	0	1	1
	beta-aspartyl-peptidase activity [GO:0008798]	2	0	0	1	1
	calcium- and calmodulin-regulated 3',5'-cyclic-GMP phosphodiesterase activity [GO:0048101]	2	0	0	1	1
	BH3 domain binding [GO:0051434]	4	0	0	1	1
	RING-like zinc finger domain binding [GO:0071535]	2	0	0	1	1
	reelin receptor activity [GO:0038025]	2	0	0	1	1
	alkane 1-monooxygenase activity [GO:0018685]	2	0	0	1	1
	stearic acid binding [GO:0070540]	1	0	0	1	1
	inorganic phosphate transmembrane transporter activity [GO:0005315]	3	0	0	1	1
	phosphate:proton symporter activity [GO:0015317]	1	0	0	1	1
	thromboxane-A synthase activity [GO:0004796]	2	0	0	1	1
	oxidoreductase activity, acting on paired donors, with incorporation or reduction of molecular oxygen [GO:0016705]	7	0	0	1	1
	monooxygenase activity [GO:0004497]	19	0	0	1	1
	RNA polymerase II intronic transcription regulatory region sequence-specific DNA binding [GO:0001162]	6	0	0	1	1
	sequence-specific single stranded DNA binding [GO:0098847]	2	0	0	1	1
	translation elongation factor binding [GO:0061770]	1	0	0	1	1
	(R,R)-butanediol dehydrogenase activity [GO:0000721]	1	0	0	1	1
	D-xylulose reductase activity [GO:0046526]	1	0	0	1	1
	L-iditol 2-dehydrogenase activity [GO:0003939]	1	0	0	1	1
	ribitol 2-dehydrogenase activity [GO:0050255]	1	0	0	1	1
	poly(C) RNA binding [GO:0017130]	1	0	0	1	1
	TFIIH-class transcription factor complex binding [GO:0001097]	2	0	0	1	1
	mineralocorticoid receptor binding [GO:0031962]	1	0	0	1	1
	11-beta-hydroxysteroid dehydrogenase (NAD+) activity [GO:0070523]	1	0	0	1	1
	dipeptidyl-peptidase activity [GO:0008239]	9	0	0	1	1
	oxidized pyrimidine nucleobase lesion DNA N-glycosylase activity [GO:0000703]	2	0	0	1	1
	SUMO conjugating enzyme activity [GO:0061656]	1	0	0	1	1
	troponin I binding [GO:0031013]	2	0	0	1	1
	C5-methylcytidine-containing RNA binding [GO:0062153]	3	0	0	1	1
	ethanol binding [GO:0035276]	2	0	0	1	1
	benzaldehyde dehydrogenase [NAD(P)+] activity [GO:0019115]	1	0	0	1	1
	hemoglobin binding [GO:0030492]	1	0	0	1	1
	cell adhesive protein binding involved in AV node cell-bundle of His cell communication [GO:0086082]	1	0	0	1	1
	L-phosphoserine phosphatase activity [GO:0036424]	1	0	0	1	1
	HLH domain binding [GO:0043398]	4	0	0	1	1
	acid-sensing ion channel activity [GO:0044736]	1	0	0	1	1
	all-trans retinal binding [GO:0005503]	2	0	0	1	1
	P2Y1 nucleotide receptor binding [GO:0031812]	1	0	0	1	1
	alditol:NADP+ 1-oxidoreductase activity [GO:0004032]	11	0	0	1	1
	CMP-N-acetylneuraminate transmembrane transporter activity [GO:0005456]	1	0	0	1	1
	alcohol dehydrogenase activity, zinc-dependent [GO:0004024]	2	0	0	1	1
	alcohol dehydrogenase (NAD+) activity [GO:0004022]	3	0	0	1	1
	DNA-dependent protein kinase activity [GO:0004677]	3	0	0	1	1
	interleukin-6 receptor binding [GO:0005138]	3	0	0	1	1
	ion gated channel activity [GO:0022839]	1	0	0	1	1
	chloride-activated potassium channel activity [GO:0070089]	1	0	0	1	1
	N-acetylgalactosamine 4-sulfate 6-O-sulfotransferase activity [GO:0050659]	2	0	0	1	1
	EGF-domain serine glucosyltransferase activity [GO:0140561]	3	0	0	1	1
	inositol pentakisphosphate 2-kinase activity [GO:0035299]	1	0	0	1	1
	fructose 6-phosphate aldolase activity [GO:0097023]	1	0	0	1	1
	fructose-1-phosphatase activity [GO:0103026]	1	0	0	1	1
	protein carboxyl O-methyltransferase activity [GO:0051998]	1	0	0	1	1
	protein-glutamate O-methyltransferase activity [GO:0008983]	1	0	0	1	1
	D-serine transmembrane transporter activity [GO:0042945]	1	0	0	1	1
	BMP binding [GO:0036122]	5	0	0	1	1
	peroxidase activity [GO:0004601]	13	0	0	1	1
	glutathione peroxidase activity [GO:0004602]	14	0	0	1	1
	neutral amino acid transmembrane transporter activity [GO:0015175]	10	0	0	1	1
	peptidyl-lysine 4-dioxygenase activity [GO:0106156]	1	0	0	1	1
	phosphopantothenate--cysteine ligase activity [GO:0004632]	1	0	0	1	1
	succinate-hydroxymethylglutarate CoA-transferase activity [GO:0047369]	1	0	0	1	1
	sialate 4-O-acetylesterase activity [GO:0106331]	1	0	0	1	1
	sialate 9-O-acetylesterase activity [GO:0106330]	1	0	0	1	1
	sialate O-acetylesterase activity [GO:0001681]	1	0	0	1	1
	high-affinity glutamate transmembrane transporter activity [GO:0005314]	3	0	0	1	1
	polyprenol reductase activity [GO:0102389]	1	0	0	1	1
	cholestenone 5-alpha-reductase activity [GO:0047751]	1	0	0	1	1
	3-oxo-5-alpha-steroid 4-dehydrogenase activity [GO:0003865]	1	0	0	1	1
	pH-gated chloride channel activity [GO:0061797]	1	0	0	1	1
	ribokinase activity [GO:0004747]	1	0	0	1	1
	protein-fructosamine 3-kinase activity [GO:0102194]	1	0	0	1	1
	protein-ribulosamine 3-kinase activity [GO:0102193]	2	0	0	1	1
	peptide-O-fucosyltransferase activity [GO:0046922]	2	0	0	1	1
	phospholipid-hydroperoxide glutathione peroxidase activity [GO:0047066]	1	0	0	1	1
	(alpha-N-acetylneuraminyl-2,3-beta-galactosyl-1,3)-N-acetyl-galactosaminide 6-alpha-sialyltransferase activity [GO:0047290]	1	0	0	1	1
	alpha-N-acetylgalactosaminide alpha-2,6-sialyltransferase activity [GO:0001665]	2	0	0	1	1
	triokinase activity [GO:0050354]	1	0	0	1	1
	leukotriene-B4 20-monooxygenase activity [GO:0050051]	1	0	0	1	1
	glycerone kinase activity [GO:0004371]	1	0	0	1	1
	GDP-Man:Man2GlcNAc2-PP-dolichol alpha-1,6-mannosyltransferase activity [GO:0102704]	1	0	0	1	1
	carbohydrate kinase activity [GO:0019200]	1	0	0	1	1
	FAD-AMP lyase (cyclizing) activity [GO:0034012]	1	0	0	1	1
	5'-3' DNA/RNA helicase activity [GO:0033678]	1	0	0	1	1
	morphogen activity [GO:0016015]	1	0	0	1	1
	ABC-type putrescine transporter activity [GO:0015594]	1	0	0	1	1
	histone acetyltransferase activity (H4-K5 specific) [GO:0043995]	1	0	0	1	1
	histone acetyltransferase activity (H4-K8 specific) [GO:0043996]	1	0	0	1	1
	GDP-Man:Man1GlcNAc2-PP-Dol alpha-1,3-mannosyltransferase activity [GO:0004378]	1	0	0	1	1
	UDP-N-acetylglucosamine-dolichyl-phosphate N-acetylglucosaminephosphotransferase activity [GO:0003975]	1	0	0	1	1
	arsenite methyltransferase activity [GO:0030791]	1	0	0	1	1
	dCTP deaminase activity [GO:0008829]	1	0	0	1	1
	N-acetylneuraminate synthase activity [GO:0050462]	1	0	0	1	1
	N-acylneuraminate-9-phosphate synthase activity [GO:0047444]	1	0	0	1	1
	sialic acid transmembrane transporter activity [GO:0015136]	1	0	0	1	1
	sialic acid:proton symporter activity [GO:0015538]	1	0	0	1	1
	NAD-dependent histone deacetylase activity (H3-K18 specific) [GO:0097372]	1	0	0	1	1
	protein-glutaryllysine deglutarylase activity [GO:0061697]	2	0	0	1	1
	protein-succinyllysine desuccinylase activity [GO:0036055]	2	0	0	1	1
	holo-[acyl-carrier-protein] synthase activity [GO:0008897]	1	0	0	1	1
	MHC class Ib receptor activity [GO:0032394]	1	0	0	1	1
	arsenate reductase (glutaredoxin) activity [GO:0008794]	1	0	0	1	1
	diolein transacylation activity [GO:0051265]	1	0	0	1	1
	mono-olein transacylation activity [GO:0051264]	1	0	0	1	1
	adenyl deoxyribonucleotide binding [GO:0032558]	1	0	0	1	1
	MHC class Ib protein complex binding [GO:0023025]	1	0	0	1	1
	MHC class Ib protein binding [GO:0023029]	2	0	0	1	1
	MHC class I receptor activity [GO:0032393]	2	0	0	1	1
	MHC class I protein binding [GO:0042288]	10	0	0	1	1
	box C/D snoRNP complex binding [GO:0062064]	2	0	0	1	1
	omega-amidase activity [GO:0050152]	1	0	0	1	1
	2-oxoglutaramate amidase activity [GO:0106008]	1	0	0	1	1
	bisphosphoglycerate 2-phosphatase activity [GO:0004083]	1	0	0	1	1
	deoxynucleotide transmembrane transporter activity [GO:0030233]	1	0	0	1	1
	thiamine pyrophosphate transmembrane transporter activity [GO:0090422]	1	0	0	1	1
	calcium, potassium:sodium antiporter activity [GO:0008273]	1	0	0	1	1
	beta-glucosidase activity [GO:0008422]	1	0	0	1	1
	cyclic-nucleotide phosphodiesterase activity [GO:0004112]	1	0	0	1	1
	glutamate:sodium symporter activity [GO:0015501]	3	0	0	1	1
	glutamate binding [GO:0016595]	6	0	0	1	1
	phosphoseryl-selenocysteinyl-tRNA selenium transferase activity [GO:0098621]	1	0	0	1	1
	methylarsonite methyltransferase activity [GO:0030792]	1	0	0	1	1
	strictosidine synthase activity [GO:0016844]	1	0	0	1	1
	ABC-type heme transporter activity [GO:0015439]	1	0	0	1	1
	carbohydrate response element binding [GO:0035538]	1	0	0	1	1
	N-acetylglucosaminyldiphosphodolichol N-acetylglucosaminyltransferase activity [GO:0004577]	1	0	0	1	1
	lactosylceramide 4-alpha-galactosyltransferase activity [GO:0050512]	1	0	0	1	1
	inositol-3-phosphate synthase activity [GO:0004512]	1	0	0	1	1
	interleukin-33 receptor activity [GO:0002114]	1	0	0	1	1
	ABC-type polyamine transporter activity [GO:0015417]	1	0	0	1	1
	AF-1 domain binding [GO:0050683]	1	0	0	1	1
	structural constituent of tooth enamel [GO:0030345]	1	0	0	1	1
	tRNA 2'-O-methyltransferase activity [GO:0106050]	1	0	0	1	1
	phospho-N-acetylmuramoyl-pentapeptide-transferase activity [GO:0008963]	1	0	0	1	1
	diphthine synthase activity [GO:0004164]	1	0	0	1	1
	voltage-gated calcium channel activity involved in cardiac muscle cell action potential [GO:0086007]	1	0	0	1	1
	pyrimidine nucleotide-sugar transmembrane transporter activity [GO:0015165]	1	0	0	1	1
	agmatinase activity [GO:0008783]	1	0	0	1	1
	EP4 subtype prostaglandin E2 receptor binding [GO:0031867]	1	0	0	1	1
	chitobiosyldiphosphodolichol beta-mannosyltransferase activity [GO:0004578]	1	0	0	1	1
	inositol bisphosphate phosphatase activity [GO:0016312]	2	0	0	1	1
	inositol trisphosphate phosphatase activity [GO:0046030]	1	0	0	1	1
	phosphatidylinositol trisphosphate phosphatase activity [GO:0034594]	1	0	0	1	1
	vasopressin receptor activity [GO:0005000]	1	0	0	1	1
	phosphorylated histone binding [GO:0106153]	1	0	0	1	1
	sulfur carrier activity [GO:0097163]	1	0	0	1	1
	diphthine methylesterase activity [GO:0061685]	1	0	0	1	1
	alcohol dehydrogenase [NAD(P)+] activity [GO:0018455]	1	0	0	1	1
	thiamin-triphosphatase activity [GO:0050333]	1	0	0	1	1
	tRNA (adenine-N6-)-methyltransferase activity [GO:0016430]	1	0	0	1	1
	tRNA m6t6A37 methyltransferase activity [GO:0089715]	1	0	0	1	1
	deoxyhypusine monooxygenase activity [GO:0019135]	1	0	0	1	1
	ADP-specific glucokinase activity [GO:0043843]	1	0	0	1	1
	store-operated calcium channel activity [GO:0015279]	2	0	0	1	1
	GDP-mannose hydrolase activity [GO:0052751]	1	0	0	1	1
	histone acetyltransferase regulator activity [GO:0035034]	2	0	0	1	1
	chenodeoxycholate 7-alpha-dehydrogenase (NAD+) activity [GO:0106281]	1	0	0	1	1
	cholate 7-alpha-dehydrogenase activity [GO:0008709]	1	0	0	1	1
	isoursodeoxycholate 7-beta-dehydrogenase (NAD+) activity [GO:0106282]	1	0	0	1	1
	ursodeoxycholate 7-beta-dehydrogenase (NAD+) activity [GO:0106283]	1	0	0	1	1
	G protein-coupled opioid receptor activity [GO:0004985]	1	0	0	1	1
	peptide-methionine (S)-S-oxide reductase activity [GO:0008113]	2	0	0	1	1
	MADS box domain binding [GO:0097162]	1	0	0	1	1
	3-demethoxyubiquinol 3-hydroxylase activity [GO:0008682]	1	0	0	1	1
	mitochondrial proton-transporting ATP synthase complex binding [GO:0140260]	2	0	0	1	1
	histone kinase activity (H3-S10 specific) [GO:0035175]	1	0	0	1	1
	3'-tRNA processing endoribonuclease activity [GO:0042781]	2	0	0	1	1
	tRNA-specific ribonuclease activity [GO:0004549]	1	0	0	1	1
	poly(U)-specific exoribonuclease activity, producing 3' uridine cyclic phosphate ends [GO:1990838]	1	0	0	1	1
	vitamin-K-epoxide reductase (warfarin-insensitive) activity [GO:0047058]	1	0	0	1	1
	NAD+ diphosphatase activity [GO:0000210]	2	0	0	1	1
	single-stranded DNA exodeoxyribonuclease activity [GO:0008297]	1	0	0	1	1
	alpha-ketoglutarate transmembrane transporter activity [GO:0015139]	1	0	0	1	1
	taste receptor binding [GO:0031883]	1	0	0	1	1
	racemase and epimerase activity [GO:0016854]	1	0	0	1	1
	tRNA dimethylallyltransferase activity [GO:0052381]	1	0	0	1	1
	glucose-6-phosphatase activity [GO:0004346]	1	0	0	1	1
	dolichyl-P-Man:Man(7)GlcNAc(2)-PP-dolichol alpha-1,6-mannosyltransferase [GO:0052917]	1	0	0	1	1
	mRNA 3'-UTR AU-rich region binding [GO:0035925]	22	0	0	1	1
	selenite:proton symporter activity [GO:0097079]	1	0	0	1	1
	zinc:bicarbonate symporter activity [GO:0140412]	1	0	0	1	1
	G protein-coupled photoreceptor activity [GO:0008020]	1	0	0	1	1
	D-serine ammonia-lyase activity [GO:0008721]	1	0	0	1	1
	serine racemase activity [GO:0030378]	1	0	0	1	1
	threonine racemase activity [GO:0018114]	1	0	0	1	1
	peptidyl-proline 4-dioxygenase activity [GO:0031545]	1	0	0	1	1
	UFM1 activating enzyme activity [GO:0071566]	1	0	0	1	1
	mRNA N-acetyltransferase activity [GO:0106162]	1	0	0	1	1
	rRNA cytidine N-acetyltransferase activity [GO:1990883]	1	0	0	1	1
	interleukin-1, type I receptor binding [GO:0005150]	2	0	0	1	1
	protein-L-histidine N-pros-methyltransferase activity [GO:0106370]	1	0	0	1	1
	protein xylosyltransferase activity [GO:0030158]	1	0	0	1	1
	chromatin-protein adaptor [GO:0140463]	1	0	0	1	1
	proline:sodium symporter activity [GO:0005298]	1	0	0	1	1
	S-methylmethionine-homocysteine S-methyltransferase activity [GO:0061627]	1	0	0	1	1
	cysteine-type endopeptidase activator activity [GO:0140608]	2	0	0	1	1
	cytidine kinase activity [GO:0043771]	2	0	0	1	1
	phosphatidylserine transfer activity [GO:0140343]	2	0	0	1	1
	selenium binding [GO:0008430]	7	0	0	1	1
	S-methyl-5-thioribose-1-phosphate isomerase activity [GO:0046523]	1	0	0	1	1
	acireductone dioxygenase [iron(II)-requiring] activity [GO:0010309]	1	0	0	1	1
	trans-2-enoyl-CoA reductase (NADPH) activity [GO:0019166]	3	0	0	1	1
	voltage-gated calcium channel activity involved in AV node cell action potential [GO:0086056]	1	0	0	1	1
	protein adenylylhydrolase activity [GO:0044603]	1	0	0	1	1
	CDP-diacylglycerol-serine O-phosphatidyltransferase activity [GO:0003882]	1	0	0	1	1
	dolichyl pyrophosphate Glc1Man9GlcNAc2 alpha-1,3-glucosyltransferase activity [GO:0042283]	1	0	0	1	1
	gamma-glutamylaminecyclotransferase activity [GO:0061929]	1	0	0	1	1
	alpha-1,6-mannosyltransferase activity [GO:0000009]	1	0	0	1	1
	high voltage-gated calcium channel activity [GO:0008331]	3	0	0	1	1
	ADP-sugar diphosphatase activity [GO:0019144]	2	0	0	1	1
	pre-mRNA intronic pyrimidine-rich binding [GO:0097158]	1	0	0	1	1
	calcium-dependent carbohydrate binding [GO:0120153]	1	0	0	1	1
	N-acetylneuraminate lyase activity [GO:0008747]	1	0	0	1	1
	thioredoxin-disulfide reductase activity [GO:0004791]	6	0	0	1	1
	synaptic receptor adaptor activity [GO:0030160]	3	0	0	1	1
	alpha-(1->6)-fucosyltransferase activity [GO:0046921]	1	0	0	1	1
	glycoprotein 6-alpha-L-fucosyltransferase activity [GO:0008424]	1	0	0	1	1
	thyroxine 5'-deiodinase activity [GO:0004800]	1	0	0	1	1
	UFM1 hydrolase activity [GO:0071567]	1	0	0	1	1
	MHC class Ib protein binding, via antigen binding groove [GO:0023030]	1	0	0	1	1
	3'-tyrosyl-DNA phosphodiesterase activity [GO:0017005]	1	0	0	1	1
	type 1 metabotropic glutamate receptor binding [GO:0031798]	1	0	0	1	1
	double-stranded DNA 5'-3' exodeoxyribonuclease activity [GO:0051908]	1	0	0	1	1
	cohesin loading activity [GO:0061775]	1	0	0	1	1
	N-acylmannosamine kinase activity [GO:0009384]	1	0	0	1	1
	UDP-N-acetylglucosamine 2-epimerase activity [GO:0008761]	1	0	0	1	1
	promoter-enhancer loop anchoring activity [GO:0140585]	1	0	0	1	1
	lipoyltransferase activity [GO:0017118]	1	0	0	1	1
	tRNA-intron endonuclease activity [GO:0000213]	2	0	0	1	1
	translation regulator activity [GO:0045182]	14	0	0	1	1
	5.8S rRNA binding [GO:1990932]	1	0	0	1	1
	ribitol beta-1,4-xylosyltransferase activity [GO:0120053]	1	0	0	1	1
	N-acetylglucosaminylphosphatidylinositol deacetylase activity [GO:0000225]	1	0	0	1	1
	Toll-like receptor 2 binding [GO:0035663]	1	0	0	1	1
	UDP-N-acetylglucosamine transmembrane transporter activity [GO:0005462]	1	0	0	1	1
	interferon-gamma binding [GO:0019964]	1	0	0	1	1
	L-gulonate 3-dehydrogenase activity [GO:0050104]	1	0	0	1	1
	guanine deaminase activity [GO:0008892]	1	0	0	1	1
	talin binding [GO:1990147]	1	0	0	1	1
	cystine:glutamate antiporter activity [GO:0015327]	1	0	0	1	1
	bile acid transmembrane transporter activity [GO:0015125]	5	0	0	1	1
	inositol-1,3,4,5,6-pentakisphosphate 3-phosphatase activity [GO:0030351]	1	0	0	1	1
	mannose binding [GO:0005537]	12	0	0	1	1
	histone deacetylase activity (H4-K16 specific) [GO:0034739]	1	0	0	1	1
	sodium-independent organic anion transmembrane transporter activity [GO:0015347]	4	0	0	1	1
	sarcosine dehydrogenase activity [GO:0008480]	1	0	0	1	1
	intracellular cAMP-activated cation channel activity [GO:0005222]	1	0	0	1	1
	citrate-L-glutamate ligase activity [GO:0072591]	1	0	0	1	1
	ionotropic glutamate receptor activity [GO:0004970]	1	0	0	1	1
	myosin I binding [GO:0017024]	1	0	0	1	1
	tyrosine binding [GO:0072545]	1	0	0	1	1
	protein-arginine deiminase activity [GO:0004668]	2	0	0	1	1
	alpha-1,3-mannosylglycoprotein 4-beta-N-acetylglucosaminyltransferase activity [GO:0008454]	2	0	0	1	1
	riboflavin transmembrane transporter activity [GO:0032217]	1	0	0	1	1
	organic anion transmembrane transporter activity [GO:0008514]	8	0	0	1	1
	5beta-cholestane-3alpha,7alpha-diol 12alpha-hydroxylase activity [GO:0033779]	1	0	0	1	1
	7alpha-hydroxycholest-4-en-3-one 12alpha-hydroxylase activity [GO:0033778]	1	0	0	1	1
	sterol 12-alpha-hydroxylase activity [GO:0008397]	1	0	0	1	1
	bisphosphoglycerate 3-phosphatase activity [GO:0034417]	1	0	0	1	1
	inositol hexakisphosphate 2-phosphatase activity [GO:0052826]	1	0	0	1	1
	alanine-glyoxylate transaminase activity [GO:0008453]	1	0	0	1	1
	NADPH phosphatase activity [GO:0102757]	1	0	0	1	1
	2-octaprenyl-6-methoxyphenol hydroxylase activity [GO:0008681]	1	0	0	1	1
	N-acetylgalactosamine-6-phosphate deacetylase activity [GO:0047419]	1	0	0	1	1
	oligosaccharyl transferase activity [GO:0004576]	1	0	0	1	1
	Hsp27 protein binding [GO:0051008]	1	0	0	1	1
	cysteine desulfurase activity [GO:0031071]	1	0	0	1	1
	1-alkenyl-2-acylglycerol choline phosphotransferase activity [GO:0047359]	1	0	0	1	1
	ethanolaminephosphotransferase activity [GO:0004307]	1	0	0	1	1
	semaphorin receptor activity [GO:0017154]	11	0	0	1	1
	growth factor binding [GO:0019838]	26	0	0	1	1
	cytokine binding [GO:0019955]	21	0	0	1	1
	protein ADP-ribosylase activity [GO:1990404]	12	0	0	1	1
	arachidonate 12(R)-lipoxygenase activity [GO:0106237]	1	0	0	1	1
	arachidonate 8(R)-lipoxygenase activity [GO:0047677]	1	0	0	1	1
	NAD+ ADP-ribosyltransferase activity [GO:0003950]	17	0	0	1	1
	NAD DNA ADP-ribosyltransferase activity [GO:0140294]	3	0	0	1	1
[truncated: 1,836 more rows]
