# Supplementary material for: DEAD box RNA helicases are pervasive protein kinase interactors and activators
Source: HighWire-hosted journal article supplement (doi:10.1101/gr.278264.123), 2024-06-01
Supplement: Supplemental_Table_S6_.xlsx [file Supplemental_Table_S6_.xlsx]

## Sheet: Description
	List of all DDX/DHX interacting protein kinases

## Sheet: interacting_kinases_eCDF_2
	Symbol	Uniprot ID	DDX41	DDX48	DDX43	DHX35	DHX8	DDX24	DDX1	DDX23	DHX59	DDX39A	DHX58	DDX31	DHX15	DDX6	DDX55	DDX19A	DDX54	DDX11	DDX5	DHX38	DDX46	DDX47	DDX3X	DHX16	DDX52	DDX2A	DDX27	DHX30	DDX49	DDX50	DDX4	DDX56
	SCYL1	Q96KG9	0.908313	0.895795	0.892935	0.888439	0.882817	0.88151	0.878764	0.877285	0.876463	0.874573	0.871745	0.8714	0.871014	0.868967	0.86517	0.862572	0.861348	0.859811	0.855134	0.852997	0.852619	0.850745	0.840323	0.839353	0.838407	0.824081	0.821089	0.820941	0.819084	0.816544	0.805933	0.786576
	PRKCI	P41743	0.802127	0.733635	0.688363	0.717303	0.595657	0.780206	0.705928	0.711558	0.624515	0.720073	0.724619	0.696204	0.684763	0.750329	0.697626	0.729739	0.682445	0.64397	0.779261	0.679198	0.615301	0.795543	0.80027	0.637148	0.768255	0.660524	0.647464	0.555374	0.791952	0.726073	0.677637	0.691026
	PRKAA1	Q13131	0.795083	0.742397	0.77119	0.687319	0.709733	0.70929	0.728408	0.770746	0.84915	0.673091	0.706873	0.739701	0.766767	0.723714	0.769842	0.795798	0.719901	0.714723	0.759756	0.720229	0.718503	0.744238	0.735879	0.709347	0.72595	0.769554	0.708558	0.712339	0.712873	0.749893	0.720558	0.721742
	PRKCD	Q05655	0.769472	0.692185	0.738887	0.733512	0.725572	0.717706	0.741066	0.714542	0.74317	0.718487	0.732485	0.671974	0.719079	0.701226	0.69927	0.705246	0.73583	0.743457	0.716671	0.74017	0.71852	0.719703	0.726098	0.774724	0.675886	0.717172	0.720188	0.738427	0.679774	0.700873	0.718643	0.721413
	FYN	P06241	0.761236	0.404409	0.673149	0.709643	0.677957	0.321977	0.641184	0.617611	0.741608	0.604337	0.516743	0.403406	0.730339	0.619666	0.606219	0.604468	0.793982	0.721002	0.64582	0.646559	0.453462	0.625962	0.726517	0.618277	0.5667	0.643296	0.496959	0.687393	0.623619	0.717731	0.548149	0.629307
	CDK4	P11802	0.748027	0.432371	0.58415	0.587988	0.56333	0.606515	0.61452	0.459142	0.652494	0.585974	0.562138	0.667987	0.591835	0.665209	0.592583	0.381058	0.60418	0.571451	0.660721	0.479863	0.56181	0.617808	0.840002	0.523581	0.595419	0.612827	0.453281	0.485	0.508219	0.620134	0.604402	0.531127
	GSK3A	P49840	0.747953	0.684631	0.702772	0.725958	0.64568	0.743425	0.709421	0.733652	0.713925	0.74631	0.649033	0.660935	0.718808	0.689637	0.707013	0.697602	0.686727	0.658157	0.659094	0.677152	0.660393	0.709659	0.732476	0.653768	0.665883	0.708394	0.641866	0.63525	0.663483	0.644883	0.66128	0.688684
	PDK3	Q15120	0.713605	0.605824	0.563799	0.61143	0.261088	0.631937	0.526351	0.4285	0.663804	0.600983	0.332169	0.673946	0.645902	0.668374	0.710358	0.585144	0.458648	0.307363	0.707194	0.451177	0.490318	0.720156	0.765987	0.246178	0.663779	0.652486	0.307231	0.235485	0.479706	0.46672	0.470887	0.619822
	PKN3	Q6P5Z2	0.711607	0.176116	0.158173	0.171957	0.25226	0.158543	0.186637	0.155666	0.122304	0.285672	0.142326	0.22004	0.161806	0.171374	0.141965	0.168875	0.160228	0.165209	0.133655	0.213177	0.179642	0.135069	0.15496	0.192785	0.133688	0.156702	0.231482	0.153957	0.121926	0.0950076	0.192867	0.145557
	RAF1	P04049	0.703454	0.322207	0.277461	0.392277	0.188848	0.342336	0.322758	0.402272	0.235764	0.456273	0.229994	0.270006	0.344399	0.468397	0.290998	0.19964	0.317029	0.248899	0.304371	0.3888	0.268198	0.280946	0.500871	0.21612	0.236035	0.360394	0.146461	0.21109	0.220114	0.234802	0.400554	0.278529
	PKN2	Q16513	0.685421	0.519118	0.465397	0.469506	0.463095	0.477249	0.421012	0.438947	0.315377	0.414297	0.312196	0.557601	0.39231	0.390535	0.420379	0.423059	0.437336	0.453191	0.36166	0.44341	0.500797	0.411757	0.350621	0.352405	0.458574	0.370192	0.358989	0.30165	0.411436	0.310725	0.424291	0.461673
	IRAK1	P51617	0.674094	0.450963	0.417897	0.329284	0.320259	0.265896	0.366345	0.29053	0.242561	0.343832	0.409784	0.285738	0.248389	0.490671	0.210481	0.313577	0.224487	0.361044	0.278423	0.33512	0.284201	0.211961	0.325355	0.375058	0.310404	0.257586	0.124992	0.261573	0.172187	0.254356	0.299398	0.235263
	DAPK3	O43293	0.667527	0.619181	0.6208	0.658995	0.713744	0.589944	0.710481	0.326728	0.659719	0.621581	0.75743	0.579415	0.689925	0.551108	0.499005	0.483496	0.714501	0.755614	0.564095	0.721388	0.597194	0.624827	0.602208	0.71275	0.565336	0.506173	0.589912	0.450281	0.461887	0.657557	0.705352	0.60598
	GSK3B	P49841	0.655436	0.411034	0.597383	0.615219	0.404491	0.671259	0.596569	0.569873	0.408108	0.608348	0.481885	0.530124	0.540234	0.537768	0.522003	0.538754	0.582037	0.447799	0.551535	0.568558	0.473493	0.538253	0.55553	0.465429	0.336657	0.51542	0.335391	0.392376	0.432379	0.55082	0.451095	0.550894
	CDC42BPB	Q9Y5S2	0.643937	0.746022	0.645811	0.683316	0.790908	0.580065	0.508006	0.488041	0.623389	0.617397	0.706166	0.712405	0.804741	0.681081	0.708122	0.623693	0.557848	0.744657	0.25443	0.710448	0.74986	0.589353	0.46321	0.689374	0.753164	0.638537	0.729558	0.682725	0.731638	0.443525	0.648992	0.650718
	ROCK1	Q13464	0.585037	0.254627	0.632126	0.547968	0.468101	0.531439	0.56199	0.49183	0.549752	0.498701	0.331857	0.445259	0.253156	0.498331	0.451917	0.56864	0.402535	0.632307	0.479739	0.517162	0.43561	0.44401	0.506485	0.484835	0.419335	0.583106	0.541253	0.513521	0.411182	0.534554	0.438536	0.579588
	CAMK2B	Q13554	0.567292	0.301757	0.594473	0.627047	0.534784	0.54348	0.688848	0.555497	0.624104	0.481474	0.622912	0.488065	0.718676	0.470451	0.456503	0.471438	0.61346	0.648203	0.620816	0.520885	0.18667	0.583985	0.559122	0.587512	0.397718	0.625008	0.445234	0.521469	0.337725	0.543423	0.526277	0.449303
	NEK9	Q8TD19	0.543702	0.484063	0.605602	0.575339	0.578914	0.530666	0.533609	0.558185	0.569922	0.513882	0.646847	0.418637	0.601526	0.774707	0.149699	0.57981	0.517039	0.590997	0.54556	0.668949	0.594966	0.512387	0.602027	0.498323	0.460646	0.534053	0.548272	0.54376	0.573424	0.519546	0.700445	0.50457
	MAP2K7	O14733	0.543415	0.33655	0.209503	0.270663	0.21067	0.325174	0.230126	0.471035	0.130638	0.341646	0.304026	0.31273	0.190763	0.238329	0.155379	0.18422	0.132085	0.298716	0.266652	0.259255	0.23735	0.165324	0.261967	0.244033	0.235863	0.190936	0.267063	0.229616	0.286362	0.230306	0.229978	0.164461
	CDK5	Q00535	0.542626	0.398236	0.456224	0.461468	0.550713	0.35806	0.44941	0.17199	0.441437	0.446533	0.511565	0.431015	0.379323	0.262288	0.368186	0.330328	0.484556	0.477545	0.448695	0.630951	0.455163	0.447782	0.473525	0.66668	0.643354	0.465758	0.516809	0.532499	0.566914	0.325108	0.419097	0.341128
	TAOK2	Q9UL54	0.511696	0.46538	0.571089	0.596972	0.546497	0.526228	0.649576	0.382389	0.451728	0.504619	0.518263	0.533075	0.48232	0.594819	0.570029	0.475194	0.323185	0.354254	0.521173	0.534127	0.554387	0.478087	0.411856	0.549924	0.650916	0.588613	0.667658	0.551412	0.556755	0.340051	0.502523	0.445012
	MYLK	Q15746	0.495989	0.428097	0.384945	0.392104	0.350243	0.478137	0.360263	0.401787	0.357501	0.400118	0.201424	0.270918	0.383154	0.286264	0.329267	0.38128	0.285524	0.238583	0.457572	0.288401	0.238164	0.432955	0.470419	0.155979	0.201358	0.372123	0.369625	0.243219	0.154466	0.344292	0.241189	0.399214
	IKBKB	O14920	0.487087	0.159077	0.238435	0.322388	0.122008	0.334643	0.25411	0.305982	0.2061	0.378189	0.159735	0.123093	0.267902	0.250296	0.192177	0.248931	0.212577	0.124359	0.247353	0.113698	0.121852	0.2091	0.294459	0.0986076	0.135891	0.268699	0.149773	0.094613	0.180398	0.251743	0.146313	0.195185
	MTOR	P42345	0.480356	0.23523	0.458016	0.466021	0.284086	0.525916	0.439341	0.436695	0.419689	0.405732	0.30604	0.0928048	0.524781	0.393469	0.36443	0.425886	0.367816	0.335679	0.458336	0.347317	0.196229	0.407508	0.582687	0.271707	0.23223	0.452377	0.169606	0.131625	0.163746	0.419015	0.229772	0.424949
	CSNK1G2	P78368	0.45832	0.346586	0.534768	0.540431	0.354764	0.556845	0.416598	0.399354	0.53651	0.398532	0.480857	0.10755	0.495364	0.360296	0.291861	0.411214	0.427259	0.393165	0.446393	0.406398	0.420256	0.518732	0.283839	0.318665	0.177974	0.163253	0.281225	0.374531	0.293086	0.499441	0.206133	0.42559
	SLK	Q9H2G2	0.445276	0.448103	0.338005	0.381173	0.220887	0.348788	0.422993	0.346882	0.300902	0.371038	0.207177	0.291516	0.391792	0.289815	0.42093	0.324213	0.341531	0.315344	0.286609	0.368449	0.289404	0.25508	0.299456	0.233274	0.395992	0.275776	0.453552	0.379619	0.278209	0.264524	0.310281	0.329769
	VRK2	Q86Y07	0.444339	0.429634	0.557001	0.542848	0.394348	0.555826	0.538006	0.445588	0.54136	0.455418	0.396724	0.339533	0.423618	0.457876	0.671628	0.440903	0.530477	0.250132	0.589862	0.43113	0.448226	0.490909	0.435897	0.513044	0.324607	0.549744	0.403324	0.41996	0.385603	0.251216	0.433678	0.700963
	CIT	O14578	0.443566	0.346051	0.625896	0.551593	0.387419	0.431418	0.643132	0.450832	0.437418	0.497888	0.383441	0.279836	0.50734	0.434516	0.514072	0.426289	0.491164	0.608857	0.410039	0.354542	0.303434	0.465117	0.414617	0.462027	0.361989	0.43861	0.369534	0.459421	0.315944	0.488181	0.332177	0.35778
	MAP2K6	P52564	0.440237	0.339435	0.419787	0.436563	0.333994	0.453035	0.426527	0.466572	0.252482	0.332974	0.324032	0.312295	0.430612	0.456774	0.348747	0.397595	0.2524	0.49663	0.449599	0.225178	0.307873	0.364816	0.411543	0.238838	0.343997	0.385217	0.325495	0.350104	0.255844	0.343438	0.3089	0.398327
	CLK3	P49761	0.435157	0.643017	0.490227	0.456421	0.409217	0.430653	0.464755	0.496885	0.306705	0.457325	0.464591	0.616	0.464673	0.591925	0.484605	0.475868	0.44798	0.427061	0.610879	0.475498	0.455131	0.447634	0.662291	0.474873	0.471923	0.242496	0.282984	0.418258	0.563133	0.553385	0.468553	0.511499
	TLK2	Q86UE8	0.414091	0.0877416	0.170848	0.256082	0.0752811	0.273113	0.239331	0.25337	0.152042	0.317958	0.263693	0.0744592	0.222523	0.23546	0.169771	0.151836	0.1478	0.106704	0.222909	0.111668	0.0822429	0.176757	0.311505	0.0622534	0.0876266	0.220575	0.138398	0.0606506	0.0709659	0.221101	0.112638	0.15796
	PTK2	Q05397	0.405995	0.16179	0.271929	0.326991	0.15556	0.374285	0.261647	0.303689	0.262247	0.373101	0.118729	0.154557	0.296234	0.239413	0.252704	0.346865	0.287382	0.088391	0.234696	0.161132	0.138702	0.377712	0.253748	0.0887033	0.145968	0.317317	0.175426	0.0810347	0.132003	0.293316	0.15145	0.397587
	CASK	O14936	0.396091	0.3221	0.525003	0.310478	0.535672	0.295412	0.407524	0.412316	0.467427	0.279228	0.576802	0.277395	0.477816	0.387633	0.300138	0.311867	0.576835	0.496992	0.473961	0.620077	0.347005	0.385102	0.437171	0.426437	0.290768	0.43164	0.366797	0.489019	0.327032	0.451835	0.320958	0.275266
	MAP2K1	Q02750	0.371137	0.637337	0.367488	0.271765	0.7043	0.311201	0.306631	0.271781	0.403727	0.362786	0.650957	0.763537	0.224265	0.359794	0.369592	0.387107	0.335859	0.686473	0.187311	0.633359	0.513874	0.363953	0.32852	0.622773	0.645137	0.43002	0.649913	0.619501	0.685799	0.220254	0.679034	0.419327
	GSG2	Q8TF76	0.355545	0.322528	0.335325	0.432946	0.251052	0.307042	0.342977	0.379455	0.330607	0.307453	0.337922	0.239118	0.452533	0.304001	0.263965	0.296185	0.0824237	0.316544	0.257866	0.33609	0.300985	0.374137	0.320555	0.288294	0.32187	0.12154	0.28342	0.295642	0.309196	0.488583	0.321582	0.371671
	CLK2	P49760	0.35386	0.515633	0.23703	0.433456	0.494172	0.474471	0.181541	0.586385	0.453018	0.535121	0.400307	0.688248	0.450314	0.542921	0.495299	0.430686	0.463358	0.380737	0.537324	0.485033	0.401672	0.356301	0.394011	0.411387	0.347227	0.653242	0.335424	0.262666	0.450856	0.578372	0.283428	0.514425
	NEK7	Q8TDX7	0.34472	0.228186	0.318286	0.356153	0.270779	0.312714	0.354353	0.333114	0.248356	0.355578	0.288606	0.220238	0.345698	0.27248	0.240646	0.270047	0.247131	0.265091	0.266299	0.273121	0.203676	0.24026	0.295248	0.222835	0.172376	0.277403	0.185626	0.187582	0.204177	0.218397	0.2488	0.223821
	TBK1	Q9UHD2	0.341621	0.268239	0.311366	0.360846	0.24949	0.318697	0.32958	0.29902	0.318122	0.334191	0.320514	0.237498	0.372477	0.361857	0.244756	0.276368	0.284587	0.282606	0.229361	0.275801	0.266447	0.194075	0.314859	0.232271	0.209972	0.275077	0.21709	0.21247	0.231761	0.370027	0.247888	0.23975
	CHUK	O15111	0.319725	0.113131	0.146477	0.210711	0.0955665	0.177949	0.20841	0.218216	0.138578	0.213317	0.103712	0.150833	0.159119	0.15648	0.129118	0.153209	0.129907	0.146757	0.182741	0.221035	0.103169	0.135291	0.224849	0.0982542	0.0916787	0.159858	0.149313	0.109663	0.071829	0.145828	0.0728646	0.143543
	BUB1B	O60566	0.313519	0.235172	0.347909	0.395384	0.433481	0.261704	0.376874	0.268263	0.152757	0.269669	0.351139	0.110846	0.302645	0.323119	0.202377	0.19424	0.227356	0.24109	0.399485	0.344753	0.101287	0.310108	0.225991	0.380318	0.167174	0.300286	0.240548	0.45347	0.136639	0.222999	0.267704	0.169861
	TRIM24	O15164	0.309557	0.311777	0.318393	0.300968	0.400472	0.314908	0.284324	0.296768	0.308694	0.401598	0.291146	0.279466	0.25277	0.326193	0.397907	0.577476	0.249762	0.121474	0.271222	0.210802	0.343808	0.319339	0.251652	0.181755	0.433366	0.379956	0.261713	0.281308	0.560996	0.449632	0.424341	0.380992
	RIOK1	Q9BRS2	0.305514	0.456783	0.312031	0.403201	0.198358	0.289806	0.245225	0.311884	0.404713	0.392031	0.311588	0.23509	0.47152	0.364775	0.31998	0.353589	0.378707	0.151672	0.371416	0.151787	0.274066	0.368679	0.639984	0.209068	0.103909	0.528636	0.282631	0.116296	0.101747	0.383984	0.148088	0.455139
	PAK4	O96013	0.284982	0.322051	0.242586	0.27299	0.25014	0.257989	0.238789	0.242077	0.11623	0.235501	0.28748	0.136425	0.253238	0.317391	0.254069	0.223542	0.214065	0.154951	0.242446	0.288639	0.336279	0.226452	0.266044	0.211829	0.314653	0.275472	0.229221	0.100736	0.28762	0.247797	0.135496	0.269028
	ROCK2	O75116	0.273031	0.180719	0.203002	0.22443	0.238263	0.18764	0.165998	0.196139	0.150883	0.202172	0.26297	0.209084	0.214303	0.190599	0.159587	0.150102	0.167511	0.275521	0.182149	0.341901	0.313741	0.164445	0.224997	0.159751	0.143559	0.181977	0.212454	0.186949	0.205468	0.165349	0.192292	0.161667
	DYRK1A	Q13627	0.268173	0.318336	0.250197	0.163138	0.35132	0.228169	0.20587	0.218914	0.243638	0.226772	0.392631	0.241263	0.204021	0.442711	0.195662	0.213522	0.154244	0.211254	0.341177	0.316158	0.382315	0.192095	0.169919	0.138554	0.309294	0.213712	0.220008	0.144965	0.191454	0.157803	0.268305	0.162595
	CDK9	P50750	0.255449	0.524362	0.163261	0.187179	0.403883	0.110822	0.232361	0.138332	0.188174	0.178861	0.453594	0.528192	0.150044	0.182199	0.169746	0.167938	0.334026	0.338884	0.159521	0.398713	0.438248	0.116542	0.20407	0.423215	0.472934	0.216531	0.387255	0.364274	0.472276	0.150036	0.325372	0.182651
	MARK1	Q9P0L2	0.245644	0.403349	0.267392	0.275406	0.23375	0.428935	0.243909	0.280658	0.193648	0.28845	0.149724	0.221676	0.225515	0.189908	0.258006	0.287612	0.299768	0.14254	0.272036	0.201004	0.265551	0.299481	0.335317	0.166549	0.0790045	0.312344	0.130754	0.188042	0.179798	0.300253	0.237761	0.27899
	PAK2	Q13177	0.238123	0.106474	0.137345	0.20698	0.105685	0.194297	0.177686	0.180941	0.177324	0.168785	0.0910047	0.303878	0.153423	0.172393	0.150924	0.151195	0.174735	0.091128	0.190862	0.182026	0.119838	0.156069	0.191758	0.0966268	0.099594	0.182494	0.254989	0.139458	0.0633795	0.15611	0.0940788	0.171522
	CDK12	Q9NYV4	0.237342	0.267417	0.268798	0.332416	0.219473	0.302464	0.386696	0.288467	0.309862	0.267351	0.20887	0.236701	0.302793	0.266036	0.332588	0.242356	0.330278	0.236742	0.454678	0.309031	0.439267	0.247904	0.253485	0.212421	0.296719	0.27668	0.290719	0.28522	0.269505	0.34809	0.178204	0.277683
	BCR	P11274	0.235854	0.0963309	0.120989	0.191519	0.0893198	0.157631	0.173585	0.173576	0.122394	0.168094	0.0900595	0.0908897	0.147661	0.158469	0.134978	0.134074	0.117923	0.0955829	0.162127	0.137082	0.0736454	0.119312	0.185396	0.135743	0.0874868	0.144036	0.0834676	0.0588095	0.0613	0.138439	0.100613	0.127819
	CSNK1G3	Q9Y6M4	0.23458	0.430242	0.464238	0.565763	0.554001	0.655445	0.464065	0.526795	0.49631	0.440911	0.483413	0.399559	0.60626	0.567769	0.469901	0.446352	0.532392	0.530551	0.517663	0.447396	0.255712	0.527806	0.483619	0.549283	0.274576	0.449525	0.441223	0.419771	0.40422	0.508137	0.364964	0.47184
	CSNK1D	P48730	0.231967	0.209372	0.256156	0.367159	0.262033	0.250066	0.229756	0.334183	0.252795	0.201054	0.330755	0.164806	0.283165	0.270335	0.267195	0.183941	0.203298	0.194774	0.266661	0.216654	0.420346	0.300656	0.297113	0.233175	0.265978	0.196895	0.253337	0.188503	0.328709	0.268477	0.33872	0.203881
	PAN3	Q58A45	0.227586	0.503288	0.237597	0.224298	0.16345	0.270417	0.21704	0.226065	0.21884	0.239109	0.118663	0.222925	0.169015	0.553097	0.293826	0.299127	0.190804	0.163294	0.139154	0.187911	0.330952	0.222375	0.17947	0.176634	0.275628	0.49649	0.228621	0.166508	0.298823	0.208706	0.22189	0.257307
	WNK1	Q9H4A3	0.226526	0.106712	0.159267	0.283214	0.152765	0.158379	0.199665	0.176708	0.140107	0.197224	0.230643	0.10238	0.153455	0.176798	0.145614	0.142425	0.188396	0.401113	0.190007	0.161009	0.155387	0.105726	0.191552	0.129677	0.228983	0.159061	0.229246	0.0811251	0.21515	0.152551	0.279812	0.123208
	CHEK1	O14757	0.220986	0.160023	0.177941	0.187969	0.1689	0.206306	0.183481	0.199361	0.216572	0.172894	0.0815771	0.50554	0.175976	0.153579	0.174218	0.178344	0.145474	0.152633	0.148606	0.303418	0.28476	0.184919	0.267844	0.208188	0.123652	0.200265	0.103482	0.13525	0.110748	0.10063	0.168702	0.315681
	AURKA	O14965	0.195719	0.152305	0.409677	0.367627	0.240079	0.281373	0.542437	0.379233	0.277198	0.271083	0.183768	0.227463	0.298963	0.421201	0.210983	0.216917	0.12269	0.307182	0.34841	0.413006	0.191618	0.131912	0.355767	0.262452	0.108512	0.405272	0.236356	0.262633	0.0845361	0.220484	0.23772	0.226501
	MARK3	P27448	0.182618	0.870833	0.519332	0.12828	0.674596	0.238937	0.283905	0.263817	0.22009	0.188675	0.595879	0.611463	0.161642	0.276195	0.522225	0.234959	0.0713276	0.578404	0.0658124	0.803311	0.520277	0.542798	0.381148	0.539461	0.809747	0.0858923	0.741542	0.767351	0.639507	0.466013	0.607616	0.387584
	PIK3R4	Q99570	0.046201	0.0282746	0.0350391	0.0486833	0.0553574	0.0379323	0.0406694	0.0397899	0.0367652	0.0414749	0.0354172	0.0388611	0.041631	0.0378255	0.0336418	0.0390091	0.029639	0.0343734	0.0384913	0.0385981	0.033535	0.0339213	0.0448366	0.0341761	0.0324747	0.0404721	0.0818648	0.0262608	0.0292691	0.0392557	0.0370857	0.038894
	CDK13	Q14004	0.0356227	0.0424283	0.0421817	0.0714838	0.0340035	0.055193	0.096109	0.0985583	0.0354748	0.060478	0.123907	0.0512477	0.0435708	0.0224553	0.0258088	0.0649905	0.0413023	0.0491189	0.047138	0.0699467	0.0383022	0.0233841	0.037883	0.0408913	0.0644315	0.019447	0.032261	0.0279951	0.0425187	0.0912184	0.106276	0.0370611
