# Supplementary material for: DEAD box RNA helicases are pervasive protein kinase interactors and activators
Source: HighWire-hosted journal article supplement (doi:10.1101/gr.278264.123), 2024-06-01
Supplement: Supplemental_Table_S8_.xlsx [file Supplemental_Table_S8_.xlsx]

## Sheet: Description
	Protoarray analysis of proteins directly interacting with recombinant DDX39A or DDX56 proteins. Recombinant GFP was used as negative control

## Sheet: ProtoArray Hits
	Database ID (GPL27459)	Description (GPL27459)	Ultimate ORF ID (GPL27459)	Official Symbol (updated)	Protein Kinase (Uniprot)	GFP Signal	DDX39 Signal	DDX56 Signal	GFP CV	DDX39A CV	DDX56 CV	GFP Z-score	DDX39A Z-score	DDX56 Z-score		Protein microarray screen for DDX39A and DDX56 binders
	BC034488.2	ATP-binding cassette, sub-family F (GCN20), member 1 (ABCF1)	IOH22312	ABCF1		2	1132.5	2887	1.41421	0.33404	0.2753	-0.1683	0.54673	1.14738		ProtoArray hits were defined proteins with a Z-score above 1, CV below 0.5 and at least 8-fold higher Signal in DDX39A and/or DDX56 compared to the GFP control. For each hit, shown is the background-subtracted fluorescence intensity (Signal), the coefficient of variation (CV) and the Z-score of the three assayed recombinant proteins.
	NM_021962.1	active BCR-related gene (ABR), transcript variant 1	IOH20993	ABR		47	1712	379	0.15045	0.06691	0.06343	-0.07558	1.08633	-0.2678
	NM_013375.2	activator of basal transcription 1 (ABT1)	IOH1920	ABT1		487.5	2218	7218	0.05947	0.02997	0.02547	0.83208	1.55749	3.59119
	NM_005469.2	acyl-CoA thioesterase 8 (ACOT8), transcript variant 1	IOH41012	ACOT8		732.5	2556	7956	0.09171	0.05699	0.31143	1.33691	1.87221	4.00761
	NM_006869.1	centaurin, alpha 1 (CENTA1)	IOH21856	ADAP1		41	1236	4713	0.17247	0.03547	0.19984	-0.08794	0.64311	2.17771
	NM_015833.1	adenosine deaminase, RNA-specific, B1 (RED1 homolog rat) (ADARB1), transcript variant 2	IOH38242	ADARB1		563.5	2719.5	10135	0.03388	0.07826	0.01479	0.98869	2.02445	5.23714
	NM_153207.2	AE binding protein 2 (AEBP2)	IOH14301	AEBP2		212.5	1876	4112	0.00333	0.02638	0.02579	0.26544	1.23904	1.83859
	BC029382.1	Angiogenic factor with G patch and FHA domains 1	IOH23139	AGGF1		218.5	2629.5	3863.5	0.13268	0.07288	0.09499	0.2778	1.94065	1.69838
	BC063275.1	eukaryotic translation initiation factor 2C, 1 (EIF2C1)	IOH40423	AGO1		81	1535	3065	0.41903	0.00092	0.06137	-0.00552	0.92152	1.24781
	BC014394.1	A.T hook DNA-binding motif-containing protein 1	IOH22936	AHDC1		338	2057	3206	0.03766	0.12994	0.03661	0.52404	1.40758	1.32737
	BC094800.1	Jouberin	IOH62619	AHI1		99.5	4331.5	6845.5	0.00711	0.14415	0.00341	0.0326	3.52544	3.381
	BC032485.1	apoptosis-inducing factor, mitochondrion-associated, 3 (AIFM3)	IOH21724	AIFM3		182.5	1147.5	3746.5	0.04262	0.11153	0.01982	0.20363	0.5607	1.63236
	NM_016283.2	TAF9 RNA polymerase II, TATA box binding protein (TBP)-associated factor, 32kDa (TAF9), transcript variant 2	IOH5842	AK6		94	1929.5	461.5	0.10531	0.00476	0.01379	0.02126	1.28885	-0.22125
	BC035256.1	Putative adenylate kinase 7	IOH27660	AK7		292	3192	563.5	0.07749	0.07133	0.09662	0.42925	2.46441	-0.1637
	NM_001008535.1	A-kinase anchor protein 14	IOH50159	AKAP14		119.5	3851	197	0.11243	0.25816	0.26561	0.07381	3.07803	-0.3705
	BC007581.1	aldehyde dehydrogenase 4 family, member A1 (ALDH4A1)	IOH6857	ALDH4A1		287	1063	2641	0.20203	0.02927	0.01125	0.41895	0.48203	1.00856
	BC025787.1	alkB, alkylation repair homolog 1 (E. coli) (ALKBH1)	IOH12000	ALKBH1		147.5	1850	5075	0.17738	0.15518	0.2037	0.13151	1.21483	2.38197
	BC103812.1	Alpha-ketoglutarate-dependent dioxygenase alkB homolog 3	IOH63363	ALKBH3		295	3409	8190	0.05273	0.04148	0.02573	0.43544	2.66647	4.13965
	NM_001629.2	arachidonate 5-lipoxygenase-activating protein (ALOX5AP)	IOH11710	ALOX5AP		234	1329	3780.5	0.12692	0.04469	0.1386	0.30974	0.72971	1.65154
	NM_024668.1	ankyrin repeat and KH domain containing 1 (ANKHD1), transcript variant 3	IOH5012	ANKHD1		208.5	3414.5	1854.5	0.05087	0.11866	0.16739	0.2572	2.67159	0.56477
	NM_017704.2	ankyrin repeat domain 49 (ANKRD49)	IOH12866	ANKRD49		124.5	2106	292.5	0.14199	0.0235	0.19098	0.08411	1.4532	-0.31661
	BC024725.1	ankyrin repeat domain 50 (ANKRD50)	IOH11143	ANKRD50		57	1866	582	0.04962	0.06063	0.05832	-0.05497	1.22973	-0.15326
	NM_145865.1	ankyrin repeat and sterile alpha motif domain containing 4B (ANKS4B)	IOH35802	ANKS4B		38.5	2249.5	78.5	1.52441	0.07701	0.56749	-0.09309	1.58682	-0.43735
	BC000238.1	ankyrin repeat and zinc finger domain containing 1 (ANKZF1)	IOH4394	ANKZF1		67	979.5	3539.5	0.35883	0.12056	0.02058	-0.03437	0.40427	1.51555
	BC013796.1	adaptor-related protein complex 2, mu 1 subunit (AP2M1)	IOH21478	AP2M1		186.5	1882	5545	0.06445	0.01879	0.03571	0.21187	1.24462	2.64718
	BC008145.1	APEX nuclease (multifunctional DNA repair enzyme) 1 (APEX1)	IOH3304	APEX1		18	705.5	3743.5	0.07857	0.13731	0.02474	-0.13533	0.14914	1.63066
	NM_001641.2	APEX nuclease (multifunctional DNA repair enzyme) 1 (APEX1), transcript variant 1	IOH5081	APEX1		36.5	608	4828	0.17436	0.01628	0.03134	-0.09721	0.05835	2.24261
	NM_014481.2	APEX nuclease (apurinic/apyrimidinic endonuclease) 2 (APEX2), nuclear gene encoding mitochondrial protein	IOH4887	APEX2		1152.5	9815.5	8794	0.3442	0.01851	0.19507	2.20234	8.6318	4.48047
	BC011739.2	apolipoprotein B mRNA editing enzyme, catalytic polypeptide-like 3C (APOBEC3C)	IOH14463	APOBEC3C		341.5	2305.5	6074	0.04762	0.00951	0.05635	0.53124	1.63896	2.94568
	NM_014508.2	apolipoprotein B mRNA editing enzyme, catalytic polypeptide-like 3C (APOBEC3C), mRNA.	IOH54737	APOBEC3C		296	3259	7307	0.11944	0.06639	0.01084	0.43749	2.5268	3.64141
	NM_001646.1	apolipoprotein C-IV (APOC4)	IOH14363	APOC4		117.5	1580.5	4110	0.0662	0.06219	0.1748	0.06969	0.96388	1.83746
	NM_019101.2	apolipoprotein M (APOM)	IOH12125	APOM		75.5	1933	1650.5	0.0281	0.07755	0.06555	-0.01685	1.29211	0.44966
	NM_175072.1	Aprataxin	IOH59828	APTX		1.5	1624	-49.5	0.4714	0.23948	-1.95704	-0.16933	1.00439	-0.50958
	BC050434.1	hypothetical protein FLJ10154 (FLJ10154)	IOH26685	ARGLU1		159	1984.5	7568.5	0.14231	0.04953	0.04606	0.1552	1.34007	3.78896
	BC094719.1	Rho GTPase-activating protein 12	IOH62673	ARHGAP12		196.5	1826	1834.5	0.0036	0.1185	0.05589	0.23247	1.19248	0.55349
	BC047918.1	Rho GTPase activating protein 24 (ARHGAP24)	IOH26981	ARHGAP24		121.5	1869.5	48	0.04074	0.03215	0.82496	0.07793	1.23299	-0.45457
	NM_001667.1	ADP-ribosylation factor-like 2 (ARL2)	IOH1753	ARL2		101.5	1974.5	306.5	0.00697	0.02829	0.05306	0.03672	1.33075	-0.30871
	NM_005737.3	ADP-ribosylation factor-like 4C (ARL4C)	IOH44753	ARL4C		185	1948	6137	0.2064	0.03267	0.15255	0.20877	1.30608	2.98122
	BC015569.1	ADP-ribosylation factor-like protein 6-interacting protein 4	IOH14802	ARL6IP4		88	1105.5	4531.5	0.09642	0.213	0.01794	0.0089	0.5216	2.0753
	NM_016638.1	ADP-ribosylation factor-like protein 6-interacting protein 4	IOH4953	ARL6IP4		469	2034.5	6745.5	0.0392	0.10601	0.06132	0.79397	1.38662	3.32458
	NM_016607.1	armadillo repeat containing, X-linked 3 (ARMCX3), transcript variant 1	IOH7393	ARMCX3		85	1226.5	3267	0.03328	0.05592	0.08355	0.00272	0.63426	1.36179
	NM_005720.1	actin related protein 2/3 complex, subunit 1B, 41kDa (ARPC1B)	IOH3992	ARPC1B		210	3161.5	8663.5	0.02694	0.00962	0.00269	0.26029	2.43601	4.40683
	NM_032467.1	Aspartate beta-hydroxylase (ASPH), transcript variant 4, mRNA	IOH53453	ASPH		148	1931.5	8064	0.086	0.00842	0.03893	0.13253	1.29072	4.06855
	NM_014065.2	Protein asteroid homolog 1	IOH43942	ASTE1		109.5	1137	4445.5	0.03229	0.01493	0.06537	0.05321	0.55093	2.02677
	BC064984.1	additional sex combs like 1 (Drosophila) (ASXL1)	IOH40665	ASXL1		269.5	1411.5	7700	0.08134	0.12274	0.06704	0.38289	0.80652	3.86317
	BC034963.1	Ankyrin repeat, SAM and basic leucine zipper domain-containing protein 1	IOH62055	ASZ1		135	2746.5	239	0.28284	0.16349	0.91125	0.10575	2.04959	-0.3468
	NM_007041.2	arginyltransferase 1 (ATE1), transcript variant 2	IOH45551	ATE1		23.5	900.5	3273.5	0.03009	0.0903	0.13371	-0.124	0.33071	1.36546
	NM_022488.2	Autophagy-related protein 3	IOH13623	ATG3		67.5	1751.5	493.5	0.03143	0.02705	1.07033	-0.03333	1.12311	-0.20319
	NM_004888.2	ATPase, H+ transporting, lysosomal 13kDa, V1 subunit G1 (ATP6V1G1)	IOH7535	ATP6V1G1		93	4743.5	6245.5	0.06083	0.22733	0.01506	0.01921	3.90907	3.04244
	NM_130463.2	V-type proton ATPase subunit G 2	IOH58658	ATP6V1G2		70.5	689	3113.5	0.13039	0.00205	0.03656	-0.02716	0.13378	1.27517
	BC001280.1	Serine/threonine-protein kinase 6	IOH21165	AURKA	protein kinase	312.5	2285	7873	0.10635	0.04085	0.02982	0.4715	1.61988	3.96078
	PV3612	aurora kinase A (AURKA), transcript variant 2		AURKA	protein kinase	266.5	2358.5	3494	0.31044	0.1664	0.20642	0.37671	1.68831	1.48988
	BC000877.1	arginine vasopressin-induced 1 (AVPI1)	IOH3268	AVPI1		103.5	920.5	3254	0.10248	0.00999	0.15298	0.04084	0.34933	1.35446
	NM_012200.2	beta-1,3-glucuronyltransferase 3 (glucuronosyltransferase I) (B3GAT3)	IOH6746	B3GAT3		27	311.5	2738.5	0	0.26559	0.10251	-0.11679	-0.21773	1.06358
	NM_006340.1	Brain-specific angiogenesis inhibitor 1-associated protein 2	IOH52178	BAIAP2		25.5	1117	3637.5	0.4714	0.08736	0.0729	-0.11988	0.5323	1.57085
	NM_017451.1	BAI1-associated protein 2 (BAIAP2), transcript variant 2	IOH42068	BAIAP2		169.5	3819	9117.5	0.1627	0.02592	0.05142	0.17684	3.04824	4.66301
	BC009458.1	Homeobox protein BarH-like 1	IOH13468	BARX1		180.5	1330	4697	0.05876	0.02339	0.03523	0.1995	0.73063	2.16869
	NM_006399.2	basic leucine zipper transcription factor, ATF-like (BATF)	IOH21626	BATF		76	968.5	2983	0.29773	0.01971	0.10809	-0.01582	0.39403	1.20154
	NM_018664.1	Jun dimerization protein p21SNFT (SNFT)	IOH44746	BATF3		128	1530	5439	0.03315	0.2089	0.01274	0.09132	0.91686	2.58737
	BC012576.1	bromodomain adjacent to zinc finger domain, 2B, mRNA (cDNA clone IMAGE:4290975), complete cds.	IOH12217	BAZ2B		151	961.5	6012.5	0.11239	0.31697	0.03281	0.13872	0.38751	2.91098
	BC053560.1	BCDIN3 domain containing (BCDIN3D)	IOH29024	BCDIN3D		72	2085	3203.5	0.05893	0.1594	0.07571	-0.02406	1.43365	1.32596
	BC011804.2	chromosome 1 open reading frame 165 (C1orf165)	IOH14438	BEND5		157	1586.5	6906	0.00901	0.00401	0.00758	0.15108	0.96947	3.41514
	BC022988.1	chromosome 6 open reading frame 65 (C6orf65)	IOH22366	BEND6		569	3604	7944	0.05965	0.10713	0.02759	1.00001	2.84804	4.00084
	NM_001204.3	Bone morphogenetic protein receptor type-2		BMPR2	protein kinase	45	1070.5	3300	0.21999	0.02048	0.01671	-0.07969	0.48901	1.38041
	NM_080926.1	Hypothetical protein similar to KIAA0187 gene product (LOC96610), mRNA	IOH50158	BMS1P20		62.5	666.5	2738	0.21496	0.0053	0.02892	-0.04364	0.11283	1.0633
	BC016987.1	family with sequence similarity 44, member A (FAM44A)	IOH11787	BOD1L1		55.5	1256	6185.5	0.21659	0.01239	0.03601	-0.05806	0.66173	3.00859
	NM_001207.2	basic transcription factor 3 (BTF3), transcript variant 2	IOH5823	BTF3		129.5	1045.5	4883	0.03822	0.04261	0.08196	0.09442	0.46573	2.27364
	NM_000061.1	Bruton agammaglobulinemia tyrosine kinase (BTK)	IOH21063	BTK	protein kinase	63	915.5	5947	0.13469	0.16143	0.01831	-0.0426	0.34468	2.87401
	NM_003939.2	beta-transducin repeat containing (BTRC), transcript variant 2, mRNA.	IOH42069	BTRC		229.5	2240	1772.5	0.08935	0.02715	0.02114	0.30047	1.57797	0.5185
	NM_003910.2	BUD31 homolog (S. cerevisiae) (BUD31)	IOH23209	BUD31		248.5	1204	6360.5	0.56056	0.12921	0.04436	0.33962	0.61332	3.10734
	BC050645.1	bystin-like (BYSL)	IOH27032	BYSL		152	669	3613.5	0.10234	0.05919	0.02563	0.14078	0.11515	1.55731
	BC093661.1	Putative uncharacterized protein C14orf177	IOH61968	C14orf177		252	836.5	3109	0.02245	0.0279	0.04048	0.34683	0.27111	1.27264
	NM_144602.1	chromosome 16 open reading frame 78 (C16orf78)	IOH11852	C16orf78		231	2227.5	6490.5	0.01837	0.01048	0.0012	0.30356	1.56633	3.18069
	XM_378660.1	PREDICTED: Homo sapiens hypothetical LOC400584 (LOC400584)	IOH44637	C17orf67		937.5	3941.5	10751.5	0.02942	0.12576	0.03716	1.75932	3.1623	5.58501
	BC014264.2	chromosome 19 open reading frame 33 (C19orf33)	IOH14605	C19orf33		74.5	2218	8128	0.18034	0.05228	0.01792	-0.01892	1.55749	4.10467
	NM_014047.1	chromosome 19 open reading frame 53 (C19orf53)	IOH11187	C19orf53		236.5	2160	5268	0.05083	0.13946	0.14577	0.31489	1.50348	2.49088
	BC012945.1	Uncharacterized protein C19orf57	IOH25802	C19orf57		96	1919	-1	0.05893	0.01474	-1.41421	0.02539	1.27908	-0.48222
	NM_023938.4	Specifically androgen-regulated gene protein	IOH3759	C1orf116		127	1937.5	760.5	0.1559	0.05803	0.09949	0.08927	1.29631	-0.05253
	BC062353.1	chromosome 1 open reading frame 131 (C1orf131)	IOH40673	C1orf131		65	783	2798	0.02176	0.01806	0.04043	-0.03849	0.2213	1.09715
	NM_207356.1	chromosome 1 open reading frame 174 (C1orf174)	IOH40044	C1orf174		171	1886	5006.5	0.12405	0.0165	0.20804	0.17993	1.24835	2.34333
	NM_152377.1	chromosome 1 open reading frame 87 (C1orf87)	IOH11555	C1orf87		367.5	4850.5	2167.5	0.44447	0.16342	0.07601	0.58482	4.00871	0.74138
	NM_024093.1	chromosome 2 open reading frame 49 (C2orf49)	IOH3089	C2orf49		160	19248.5	2947	0.06187	0.032	0.04367	0.15726	17.4152	1.18123
	NM_178338.2	Chromosome 3 open reading frame 35 (C3orf35), transcript variant A, mRNA	IOH50134	C3orf35		240.5	1196	4055	0.03822	0.02247	0.08858	0.32314	0.60586	1.80643
	NM_052958.1	chromosome 8 open reading frame 34 (C8orf34)	IOH42627	C8orf34		137.5	2423.5	89.5	0.06685	0.03239	0.13431	0.1109	1.74884	-0.43116
	NM_024046.1	CaM kinase-like vesicle-associated (CAMKV)		CAMKV	protein kinase	255.5	1849.5	7897	0.09133	0.0302	0.10709	0.35404	1.21436	3.97432
	BC033777.2	amyotrophic lateral sclerosis 2 (juvenile) chromosome region, candidate 8 (ALS2CR8)	IOH21769	CARF		58	2237	604.5	0.21945	0.00443	0.29828	-0.05291	1.57518	-0.14055
	BC002880.1	cysteinyl-tRNA synthetase (CARS)	IOH5687	CARS1		28	609.5	3467.5	0.10102	0.01508	0.08504	-0.11473	0.05975	1.47493
	ENST00000369196	Cancer susceptibility candidate 2 (CASC2), transcript variant 1, mRNA	IOH50129	CASC2		59.5	594	2770	0.17826	0.09047	0.04544	-0.04982	0.04531	1.08135
	BC032851.2	Cas-Br-M (murine) ecotropic retroviral transforming sequence b (CBLB)	IOH27168	CBLB		300	2943	947	0.15085	0.00529	0.5406	0.44573	2.23256	0.0527
	NM_144716.1	coiled-coil domain containing 12 (CCDC12)	IOH13356	CCDC12		23.5	375	3215	0.15045	0.00754	0.06642	-0.124	-0.1586	1.33245
	BC000758.1	Coiled-coil domain-containing protein 28A	IOH3735	CCDC28A		164	1437.5	3874.5	0.1121	0.15003	0.00237	0.16551	0.83073	1.70458
	BC047776.2	coiled-coil domain containing 43 (CCDC43)	IOH26688	CCDC43		28	2272	8425.5	0.05051	0.01058	0.00596	-0.11473	1.60777	4.27254
	NM_002989.2	C-C motif chemokine 21		CCL21		130.5	1734	6877	0.12462	0.24467	0.04298	0.09648	1.10682	3.39878
	NM_006072.4	chemokine (C-C motif) ligand 26 (CCL26)	IOH40395	CCL26		26	812	4378	0	0.05747	0.05911	-0.11885	0.24831	1.98869
	NM_057749.1	cyclin E2 (CCNE2)	IOH43526	CCNE2		95	1345.5	2959.5	0	0.01209	0.06666	0.02333	0.74507	1.18828
	NM_033313.1	CDC14 cell division cycle 14 homolog A (S. cerevisiae) (CDC14A), transcript variant 3	IOH20983	CDC14A		104.5	829.5	3839	0.08797	0.07587	0.14293	0.0429	0.2646	1.68455
	BC001088.1	cell division cycle 20 homolog (S. cerevisiae) (CDC20)	IOH3839	CDC20		403	4235.5	4695	0.00351	0.0566	0.06958	0.65797	3.43606	2.16756
	BC007401.2	cell division cycle 25 homolog A (S. pombe) (CDC25A)	IOH5852	CDC25A		130.5	2091.5	371.5	0.08128	0.07336	0.04758	0.09648	1.43969	-0.27203
	NM_015891.2	cell division cycle 40 homolog (S. cerevisiae) (CDC40)	IOH44384	CDC40		591.5	2556	8429.5	0.04901	0.02213	0.00243	1.04638	1.87221	4.27479
	NM_006449.2	CDC42 effector protein (Rho GTPase binding) 3 (CDC42EP3)	IOH12552	CDC42EP3		701	14157	518	0.02219	0.10649	0.42044	1.27201	12.6743	-0.18937
	PV3292	cell division cycle 2, G1 to S and G2 to M (CDC2), transcript variant 1		CDK1	protein kinase	87.5	1886.5	1729	0.05657	0.07309	0.14886	0.00788	1.24882	0.49396
	NM_033019.1	PCTAIRE protein kinase 1 (PCTK1), transcript variant 3	IOH6258	CDK16	protein kinase	96	1833	150	0.25043	0.04321	0.04714	0.02539	1.199	-0.39702
	BC027989.1	cyclin-dependent kinase 6 (CDK6)	IOH11526	CDK6	protein kinase	34.5	1153	6084	0.06149	0.13492	0.00628	-0.10133	0.56583	2.95132
	NM_001799.2	cyclin-dependent kinase 7	IOH3121	CDK7	protein kinase	153.5	1630.5	2038.5	0.02303	0.00737	0.10025	0.14387	1.01044	0.6686
	BC041799.1	Cyclin-dependent kinase-like 3, mRNA (cDNA clone MGC:41758 IMAGE:5298279), complete cds	IOH25876	CDKL3	protein kinase	348	3768.5	8301.5	0.25602	0.00844	0.01814	0.54464	3.00121	4.20256
	NM_016508.2	Cyclin-dependent kinase-like 3	IOH21339	CDKL3	protein kinase	685	1565.5	9487	0.07639	0.40245	0.13237	1.23904	0.94992	4.8715
	CENPB	CENPB		CENPB		90	745	2978	0.09428	0.04176	0.19423	0.01303	0.18592	1.19872
	NM_018132.3	centromere protein Q (CENPQ)	IOH45979	CENPQ		197	1685.5	5032	0.02871	0.0667	0.09499	0.2335	1.06166	2.35771
	BC039711.1	centrosomal protein 57kDa (CEP57)	IOH26100	CEP57		114.5	1778	4992.5	0.05558	0.00477	0.06019	0.06351	1.14779	2.33542
	BC005383.1	centrin, EF-hand protein, 3 (CDC31 homolog, yeast) (CETN3)	IOH7229	CETN3		25	1271.5	4804	0.22627	0.05394	0.00059	-0.12091	0.67616	2.22906
	NM_013242.1	chromosome 16 open reading frame 80 (C16orf80)	IOH5166	CFAP20		717.5	3151.5	6467.5	0.0818	0.02176	0.1125	1.30601	2.4267	3.16771
	NM_152770.1	Uncharacterized protein C4orf22	IOH22874	CFAP299		63	2248.5	3874.5	0.08979	0.03931	0.26883	-0.04261	1.58589	1.70458
	BC020810.1	chromodomain helicase DNA binding protein 2 (CHD2)	IOH27927	CHD2		84	1390.5	5360.5	0.11785	0.02492	0.09722	0.00066	0.78697	2.54307
	NM_001274.2	CHK1 checkpoint homolog (S. pombe) (CHEK1)		CHEK1	protein kinase	107	966	4396	0.03965	0.04978	0.03121	0.04806	0.3917	1.99885
	NM_001819.1	chromogranin B (secretogranin 1) (CHGB)	IOH3444	CHGB		146.5	4470.5	119.5	0.16893	0.03527	0.23077	0.12945	3.65487	-0.41423
	NM_012110.1	cysteine-rich hydrophobic domain 2 (CHIC2)	IOH22161	CHIC2		52.5	636.5	2970	0.06734	0.15886	0.00952	-0.06424	0.08489	1.19421
	NM_024591.1	chromatin modifying protein 6 (CHMP6)	IOH13020	CHMP6		112	-60	3048.5	0.03788	-8.67384	0.0392	0.05836	-0.56365	1.2385
	NM_015607.2	Uncharacterized protein C1orf77	IOH41553	CHTOP		431.5	1667	3492	0.20812	0.25111	0.09234	0.71669	1.04442	1.48875
	NM_001280.1	cold inducible RNA binding protein (CIRBP)	IOH2905	CIRBP		143	1376	2844.5	0.14834	0.11614	0.08328	0.12224	0.77347	1.12339
	NM_004143.2	Cbp/p300-interacting transactivator 1	IOH5542	CITED1		138	2031.5	429.5	0.17421	0.09781	0.53506	0.11193	1.38382	-0.2393
	BC010901.1	cytoskeleton associated protein 2 (CKAP2)	IOH13498	CKAP2		71.5	2226	855	0.08901	0.00381	0.11248	-0.02509	1.56494	0.00079
	NM_003278.1	C-type lectin domain family 3, member B (CLEC3B)	IOH14450	CLEC3B		163.5	1486.5	6760.5	0.37626	0.08895	0.01914	0.16448	0.87636	3.33304
	BC016609.1	cytidine monophosphate N-acetylneuraminic acid synthetase (CMAS)	IOH11216	CMAS		96.5	2026	2337.5	0.03664	0.01675	0.04749	0.02642	1.37871	0.8373
	NM_032359.1	chromosome 3 open reading frame 26 (C3orf26)	IOH5762	CMSS1		261.5	1639	6353	0.01893	0.03797	0.03695	0.3664	1.01836	3.10311
	BC000288.1	CCHC-type zinc finger, nucleic acid binding protein (CNBP)	IOH3404	CNBP		366.5	1296.5	3639	0.05981	0.04636	0.13019	0.58276	0.69944	1.5717
	NM_020348.1	cyclin M1 (CNNM1)	IOH42100	CNNM1		95.5	2679.5	195.5	0.02221	0.05252	0.00362	0.02436	1.9872	-0.37134
	BC028040.1	2',3'-cyclic nucleotide 3' phosphodiesterase (CNP)	IOH11532	CNP		144	601	2690.5	0.00982	0.3765	0.01235	0.1243	0.05183	1.03649
	NM_006586.2	Protein canopy homolog 3	IOH5802	CNPY3		51	976	5824.5	0	0.04202	0.01032	-0.06733	0.40101	2.80489
	NM_004645.1	coilin (COIL)	IOH14379	COIL		800	2438	8434	0.1538	0.09861	0.01744	1.47599	1.76234	4.27734
	BC042428.1	collagen, type XXIII, alpha 1 (COL23A1)	IOH27443	COL23A1		190	806	6661.5	0.17119	0.36145	0.13258	0.21908	0.24272	3.27718
	NM_016319.1	COP9 constitutive photomorphogenic homolog subunit 7A (Arabidopsis) (COPS7A)	IOH14433	COPS7A		72	1109.5	3619.5	0.03928	0.07457	0.06896	-0.02406	0.52532	1.56069
	BC036899.1	Cytoplasmic polyadenylation element-binding protein 4	IOH25951	CPEB4		65.5	1359	3135.5	0.20511	0.01977	0.41067	-0.03746	0.75764	1.28759
	NM_006651.2	complexin 1 (CPLX1)	IOH4343	CPLX1		121	4012	238	0.05844	0.00916	0.1129	0.07691	3.22795	-0.34736
	NM_001008220.1	complexin 2 (CPLX2), transcript variant 2	IOH42361	CPLX2		123	5893.5	138	0.04599	0.00252	0.12298	0.08103	4.97988	-0.40378
	NM_152727.4	copine II (CPNE2)	IOH28984	CPNE2		394.5	2946	9603.5	0.05915	0.01392	0.04042	0.64046	2.23536	4.93724
	BC063666.1	cAMP responsive element binding protein 3-like 2 (CREB3L2)	IOH39829	CREB3L2		528	7038.5	-250	0.14464	0.09373	-0.76368	0.91553	6.04603	-0.62272
	BC007228.1	CSAG family, member 3A (CSAG3A)	IOH6059	CSAG3		411.5	1955.5	9809.5	0.26291	0.15657	0.04981	0.67548	1.31306	5.05348
	BC013171.1	cDNA clone IMAGE:4344401, **** WARNING: chimeric clone ****	IOH22121	CSAG4		73.5	736	2771.5	0.16355	0.05188	0.08037	-0.02098	0.17754	1.0822
	PV3850	casein kinase 1, alpha 1 (CSNK1A1), transcript variant 1		CSNK1A1	protein kinase	185.5	2693.5	6659	0.04193	0.04174	0.1219	0.20981	2.00025	3.27576
	NM_001893.3	casein kinase 1, delta (CSNK1D), transcript variant 1		CSNK1D	protein kinase	173	751.5	4407.5	0	0.02541	0.00529	0.18405	0.19197	2.00533
	PV3665	casein kinase 1, delta (CSNK1D), transcript variant 1		CSNK1D	protein kinase	1013	3824	10735	0.06562	0.03809	0.03715	1.91489	3.05289	5.5757
	NM_001894.2	casein kinase 1, epsilon (CSNK1E), transcript variant 2	IOH21160	CSNK1E	protein kinase	464.5	3447.5	7172.5	0.03501	0.0441	0.08528	0.7847	2.70232	3.56552
	NM_022048.1	casein kinase 1, gamma 1 (CSNK1G1)	IOH21026	CSNK1G1	protein kinase	77.5	1183	4240	0.57481	0.07292	0.07772	-0.01273	0.59376	1.91081
	PV3825	casein kinase 1, gamma 1 (CSNK1G1)		CSNK1G1	protein kinase	232.5	1132.5	6187.5	0.44707	0.00562	0.04628	0.30665	0.54673	3.00971
	BC020972.1	Casein kinase I isoform gamma-2		CSNK1G2	protein kinase	192	2487.5	9057.5	0.13258	0.056	0.1061	0.2232	1.80842	4.62915
	NM_001319.5	casein kinase 1, gamma 2 (CSNK1G2)	IOH10417	CSNK1G2	protein kinase	44.5	796	3488.5	0.11123	0.07284	0.04196	-0.08073	0.2334	1.48678
	PV3838	casein kinase 1, gamma 3 (CSNK1G3), transcript variant 2		CSNK1G3	protein kinase	40	951.5	3806.5	0	0.00817	0.06483	-0.09	0.3782	1.66621
	BC011668.1	Casein kinase II subunit alpha		CSNK2A1	protein kinase	441	2290.5	7299	0.04169	0.01266	0.02248	0.73627	1.62499	3.6369
	NM_177559.2	casein kinase 2, alpha 1 polypeptide (CSNK2A1), transcript variant 1	IOH13704	CSNK2A1	protein kinase	34.5	894	5132	0.06149	0.0965	0.09094	-0.10133	0.32466	2.41414
	PV3248	casein kinase 2, alpha 1 polypeptide (CSNK2A1), transcript variant 2		CSNK2A1	protein kinase	64	2552	8595	0.0221	0.03048	0.09461	-0.04055	1.86849	4.36818
	NM_001896.1	Casein kinase 2, alpha prime polypeptide (CSNK2A2), mRNA		CSNK2A2	protein kinase	692	2358.5	7135	0.13488	0.52377	0.00932	1.25346	1.68831	3.54436
	NM_001896.2	casein kinase 2, alpha prime polypeptide (CSNK2A2)	IOH6369	CSNK2A2	protein kinase	447	3624	6768	0.12022	0.00702	0.01943	0.74863	2.86667	3.33728
	PV3624	casein kinase 2, alpha prime polypeptide (CSNK2A2)		CSNK2A2	protein kinase	28	2085.5	5189.5	0.15152	0.06815	0.0639	-0.11472	1.43411	2.44658
	NM_024969.2	family with sequence similarity 130, member A2 (FAM130A2)	IOH35988	CSRNP3		33	588.5	3229.5	0.04285	0.0805	0.12415	-0.10442	0.04019	1.34063
	BC028711.2	cancer/testis antigen CT45-3 (CT45-3)	IOH11814	CT45A5		133.5	1428.5	4917.5	0.22776	0.05494	0.00273	0.10266	0.82235	2.2931
	BC010501.1	Catenin delta-1	IOH10253	CTNND1		322	2403.5	7225	0.20642	0.1115	0.12038	0.49107	1.73021	3.59514
	NM_138565.1	cortactin (CTTN), transcript variant 2	IOH6227	CTTN		339.5	4369.5	2147	0.07706	0.0445	0.13701	0.52713	3.56083	0.72982
	NM_017949.1	CUE domain containing 1 (CUEDC1)	IOH29099	CUEDC1		131	1992	2453.5	0.22671	0.00568	0.10692	0.09751	1.34705	0.90276
	BC015059.1	cutC copper transporter homolog (E. coli) (CUTC)	IOH13646	CUTC		40	2306.5	4676	0	0.00705	0.00696	-0.09	1.63989	2.15684
	BC040946.1	CWC15 homolog (S. cerevisiae) (HSPC148)	IOH26289	CWC15		120	2166	2067.5	0.24749	0.15735	0.01607	0.07484	1.50907	0.68496
	NM_022101.1	chromosome X open reading frame 56 (CXorf56)	IOH27781	CXorf56		210.5	3815	3912	0.01008	0.09972	0.00615	0.26132	3.04451	1.72574
	BC034052.1	Dapper homolog 3	IOH22224	DACT3		185.5	4135	64	0.0953	0.07319	0.61872	0.2098	3.34247	-0.44554
	NM_000788.1	Deoxycytidine kinase	IOH42066	DCK		169	2091	1343	0.11715	0.08792	0.01474	0.17581	1.43923	0.27615
	NM_004734.1	doublecortin-like kinase 1 (DCLK1)		DCLK1	protein kinase	347.5	2711.5	6660	0.06308	0.00391	0.07772	0.54361	2.017	3.27633
	NM_178152.1	Neuronal migration protein doublecortin	IOH20954	DCX		833	4931.5	7015.5	0.01358	0.06409	0.0642	1.544	4.08413	3.47693
	BC007957.1	chromosome 20 open reading frame 116 (C20orf116)	IOH6766	DDRGK1		122	1555	5284.5	0.44049	0.16188	0.38871	0.07896	0.94014	2.50019
	NM_023935.1	chromosome 20 open reading frame 116 (C20orf116)	IOH4217	DDRGK1		54.5	1348.5	5706	0.06487	0.01521	0.10806	-0.06012	0.74786	2.73802
	NM_004728.2	DEAD (Asp-Glu-Ala-Asp) box polypeptide 21 (DDX21)	IOH46173	DDX21		281.5	1734	5054.5	0.0628	0.02121	0.14535	0.40761	1.10681	2.3704
	BC015505.1	DEAD (Asp-Glu-Ala-Asp) box polypeptide 42 (DDX42)	IOH9981	DDX42		145.5	1681.5	6972	0.21869	0.00631	0.11704	0.12739	1.05793	3.45238
	BC066938.1	DEAD (Asp-Glu-Ala-Asp) box polypeptide 43 (DDX43)	IOH40083	DDX43		486	4249.5	7011.5	0.1455	0.09268	0.01563	0.82899	3.44909	3.47467
	NM_016355.3	DEAD (Asp-Glu-Ala-Asp) box polypeptide 47 (DDX47), transcript variant 1	IOH39973	DDX47		256.5	3008.5	6435	0.04135	0.00353	0.10241	0.35611	2.29355	3.14938
	NM_019070.1	DEAD (Asp-Glu-Ala-Asp) box polypeptide 49 (DDX49)	IOH5264	DDX49		183	2274.5	9577.5	0.0541	0.10974	0.04614	0.20466	1.6101	4.92257
	BC001132.1	DEAD (Asp-Glu-Ala-Asp) box polypeptide 54 (DDX54)	IOH3853	DDX54		603.5	1993	5326.5	0.05273	0.04399	0.01527	1.07111	1.34798	2.52388
	NM_014314.3	Probable ATP-dependent RNA helicase DDX58	IOH52971	DDX58		43	1249.5	6875.5	0.23022	0.10696	0.05482	-0.08382	0.65568	3.39793
	NM_004397.3	Probable ATP-dependent RNA helicase DDX6	IOH45655	DDX6		350	2603	6400.5	0.04849	0.09779	0.30922	0.54876	1.91598	3.1299
	NM_003677.3	Density-regulated protein	IOH56971	DENR		28	2319.5	7783	0.45457	0.0314	0.15481	-0.11472	1.65199	3.91
	NM_001004285.1	DNA fragmentation factor, 40kDa, beta polypeptide (caspase-activated DNase) (DFFB), transcript variant 3	IOH45460	DFFB		90.5	1679	882	0.00781	0.02358	0.07055	0.01406	1.0556	0.01602
	NM_005794.2	dehydrogenase/reductase (SDR family) member 2 (DHRS2), transcript variant 2	IOH41302	DHRS2		29.5	1279.5	3227.5	0.40749	0.03592	0.0011	-0.11163	0.68361	1.3395
	NM_018180.2	DEAH (Asp-Glu-Ala-His) box polypeptide 32 (DHX32)	IOH38247	DHX32		94.5	1741.5	1447	0.14217	0.05887	0.09969	0.02229	1.1138	0.33483
	BC014949.1	DEXH (Asp-Glu-X-His) box polypeptide 58 (DHX58)	IOH13331	DHX58		54	610	2705.5	0.10476	0.02782	0.06821	-0.06115	0.06021	1.04495
	BC044586.1	ATP-dependent RNA helicase DHX8	IOH28860	DHX8		191	2852	7457	0.12587	0.07736	0.03376	0.22114	2.14783	3.72605
	NM_014473.2	DIM1 dimethyladenosine transferase 1-like (S. cerevisiae) (DIMT1L)	IOH9851	DIMT1		627	3560.5	11089	0.12405	0.02999	0.0065	1.11953	2.80754	5.77545
	NP_036374.1	DKK1 / Dkk-1 Protein (His Tag)		DKK1		174.5	1326	9209	0.06078	0.0064	0.05037	0.18714	0.72691	4.71463
	BC022082.1	Putative DAP-2 like protein C8orf68	IOH22416	DLGAP2		116.5	910	3198.5	0.05463	0.07615	0.24827	0.06763	0.33956	1.32314
	NM_004016.1	dystrophin (muscular dystrophy, Duchenne and Becker types) (DMD), transcript variant Dp71b	IOH11698	DMD		273	7971	77	0.0259	0.08321	0.0551	0.3901	6.91432	-0.43821
	BC006318.1	erythrocyte membrane protein band 4.9 (dematin) (EPB49)	IOH6433	DMTN		252.5	4275	371.5	0.03641	0.12604	0.37877	0.34786	3.47283	-0.27203
	BC022248.1	DnaJ (Hsp40) homolog, subfamily B, member 14 (DNAJB14)	IOH12822	DNAJB14		157	1078	2761.5	0.09909	0.00918	0.07093	0.15109	0.49599	1.07656
	NM_012328.1	DnaJ (Hsp40) homolog, subfamily B, member 9 (DNAJB9)	IOH22212	DNAJB9		58.5	1179.5	2775.5	0.01209	0.02938	0.07516	-0.05188	0.5905	1.08446
	NM_201259.1	Mitochondrial import inner membrane translocase subunit TIM14	IOH45586	DNAJC19		245.5	2534.5	9231.5	0.18722	0.00084	0.07284	0.33343	1.85219	4.72733
	NM_016544.1	rab and DnaJ domain containing (RBJ)	IOH22234	DNAJC27		59	1993	3238.5	0.21573	0.12844	0.07708	-0.05085	1.34797	1.34571
	BC029509.1	DnaJ homolog subfamily C member 28	IOH22569	DNAJC28		98.5	887.5	3619	0.02154	0.01195	0.08324	0.03054	0.31861	1.56041
	NM_003315.1	DnaJ (Hsp40) homolog, subfamily C, member 7 (DNAJC7)	IOH14566	DNAJC7		94	3904.5	328.5	0.03009	0.07479	0.60917	0.02127	3.12785	-0.29629
	BC033159.1	DnaJ (Hsp40) homolog, subfamily C, member 8 (DNAJC8)	IOH23223	DNAJC8		227.5	2260	9864	0.00311	0.0632	0.0205	0.29635	1.5966	5.08423
	NM_014280.1	DnaJ homolog subfamily C member 8	IOH42939	DNAJC8		248.5	4590	13096.5	0.06545	0.05669	0.08072	0.33962	3.76614	6.9082
	BC033736.1	dermatopontin (DPT)	IOH21824	DPT		330	9121	2224.5	0.06428	0.02636	1.70221	0.50755	7.98513	0.77355
	BC020803.1	developmentally regulated GTP binding protein 1 (DRG1)	IOH14817	DRG1		233	4452	6610.5	0.03642	0.04479	0.00588	0.30768	3.63765	3.2484
	BC100926.1	D-tyrosyl-tRNA(Tyr) deacylase 1	IOH63370	DTD1		35.5	532	4183	0.05976	0.02658	0.15011	-0.09927	-0.01241	1.87866
	NM_020175.1	dihydrouridine synthase 3-like (S. cerevisiae) (DUS3L)	IOH13452	DUS3L		217	1383	3975	0.16944	0.30575	0.01601	0.27472	0.77998	1.76129
	NM_012148.1	double homeobox, 3 (DUX3)	IOH39321	DUX3		108.5	2255.5	1826.5	0.17596	0.03417	0.05226	0.05115	1.59241	0.54897
	BC037854.1	dynein, cytoplasmic 1, intermediate chain 1 (DYNC1I1)	IOH27633	DYNC1I1		371	5625	550.5	0.01144	0.01257	0.04496	0.59203	4.72987	-0.17102
	NM_001396.2	Dual specificity tyrosine-phosphorylation-regulated kinase 1A		DYRK1A	protein kinase	524.5	2443	8067.5	0.13077	0.02431	0.0539	0.90833	1.76699	4.07053
	PV3837	dual-specificity tyrosine-(Y)-phosphorylation regulated kinase 3 (DYRK3), transcript variant 2		DYRK3	protein kinase	230.5	1551	3484.5	0.05829	0.05197	0.00345	0.30252	0.93642	1.48452
	NM_198256.1	E2F transcription factor 6 (E2F6), transcript variant b, mRNA	IOH50082	E2F6		48	688.5	2802.5	0.20624	0.08319	0.01943	-0.07351	0.13331	1.09969
	NM_198325.1	Transcription factor E2F6	IOH43467	E2F6		103.5	4923.5	56.5	0.10248	0.14635	0.33791	0.04084	4.07667	-0.44978
	NM_003792.1	endothelial differentiation-related factor 1 (EDF1), transcript variant alpha	IOH10852	EDF1		94.5	1216	6510.5	0.08231	0.0756	0.01683	0.0223	0.62448	3.19197
	NM_152991.1	embryonic ectoderm development (EED), transcript variant 2	IOH41083	EED		106.5	1098.5	3653	0.4714	0.00193	0.03639	0.04702	0.51507	1.5796
	NM_014955.2	KIAA0859 (KIAA0859), transcript variant 2	IOH45543	EEF1AKNMT		61.5	837.5	4627	0.10348	0.27947	0.05318	-0.0457	0.27205	2.12919
	NM_030636.1	Endonuclease/exonuclease/phosphatase family domain-containing protein 1	IOH39935	EEPD1		21	435	4250.5	2.08765	1.81084	0.26301	-0.12915	-0.10274	1.91674
	NM_018894.1	EGF-containing fibulin-like extracellular matrix protein 1 (EFEMP1), transcript variant 2	IOH37773	EFEMP1		312.5	3552	340.5	0.1335	0.00398	0.03115	0.4715	2.79962	-0.28952
	BC013648.1	EF-hand domain family, member D2 (EFHD2)	IOH10208	EFHD2		100	1908	129.5	0.18385	0.06226	1.27225	0.03363	1.26884	-0.40858
	NM_001966.2	Peroxisomal bifunctional enzyme	IOH62346	EHHADH		250	4020	11213.5	0.02828	0.0204	0.0186	0.34271	3.2354	5.8457
	NM_005801.2	eukaryotic translation initiation factor 1 (EIF1)	IOH6916	EIF1		267	2657	10377	0.02648	0.01331	0.07427	0.37774	1.96625	5.37369
	BC005248.1	eukaryotic translation initiation factor 1A, Y-linked (EIF1AY)	IOH7358	EIF1AY		46.5	1051.5	3654	0.2281	0.00471	0.00039	-0.07661	0.47131	1.58016
	BC011885.1	eukaryotic translation initiation factor 2A, 65kDa (EIF2A)	IOH14206	EIF2A		104.5	2077	9204.5	0.29096	0.04426	0.04156	0.0429	1.42619	4.71209
	NM_004094.2	eukaryotic translation initiation factor 2, subunit 1 alpha, 35kDa (EIF2S1)	IOH4059	EIF2S1		72	1040.5	4274.5	0.01964	0.16514	0.0005	-0.02406	0.46107	1.93029
	BC000934.2	eukaryotic translation initiation factor 2, subunit 2 beta, 38kDa (EIF2S2)	IOH2996	EIF2S2		209	1621	8254.5	0.0203	0.16663	0.02082	0.25823	1.0016	4.17605
	BC007888.1	eukaryotic translation initiation factor 2, subunit 2 beta, 38kDa (EIF2S2)	IOH29315	EIF2S2		55.5	1291	3904	0.16563	0.03834	0.10795	-0.05806	0.69432	1.72123
	BC032866.2	eukaryotic translation initiation factor 5 (EIF5)	IOH27132	EIF5		10	327.5	3202.5	0.14142	0.33466	0.02318	-0.15182	-0.20283	1.32539
	NM_032377.2	elongation factor 1 homolog (S. cerevisiae) (ELOF1)	IOH6191	ELOF1		975	2294.5	9000	0.293	0.45517	0.10764	1.83659	1.62871	4.5967
	BC016470.2	essential meiotic endonuclease 1 homolog 1 (S. pombe) (EME1)	IOH11948	EME1		44	716.5	2744.5	0.32141	0.08389	0.04406	-0.08176	0.15938	1.06697
	BC055314.1	EMG1 nucleolar protein homolog (S. cerevisiae) (EMG1)	IOH29446	EMG1		191	2567.5	9943.5	0.06664	0.01405	0.14002	0.22114	1.88292	5.12908
	NM_032140.1	chromosome 16 open reading frame 48 (C16orf48)	IOH6250	ENKD1		385.5	2734.5	4461.5	0.02751	0.03698	0.01537	0.62192	2.03842	2.0358
	NM_145010.1	chromosome 10 open reading frame 63 (C10orf63)	IOH10871	ENKUR		1107	11362	7081.5	0.09326	0.04095	0.03145	2.10858	10.0718	3.51417
	BC028935.1	chromosome 3 open reading frame 64 (C3orf64)	IOH22836	EOGT		139	805	2756	0.15261	0.03689	0.09904	0.11399	0.24179	1.07346
	BC034718.1	erythrocyte membrane protein band 4.1-like 2 (EPB41L2)	IOH21418	EPB41L2		206	1728.5	7889.5	0.14417	0.04295	0.01622	0.25205	1.10169	3.97009
	NM_022140.2	Band 4.1-like protein 4A	IOH38016	EPB41L4A		653	3248	7844.5	0.21441	0.00566	0.07851	1.1731	2.51655	3.9447
	BC000686.1	Mammalian ependymin-related protein 1	IOH4305	EPDR1		31	1770	2201	1.23173	0.01678	0.09381	-0.10855	1.14034	0.76028
	BC052813.1	excision repair cross-complementing rodent repair deficiency, complementation group 1 (includes overlapping antisense sequence) (ERCC1)	IOH29045	ERCC1		273	2040.5	4433.5	0.23311	0.04262	0.05183	0.3901	1.39221	2.02
	NM_207332.1	Glutamate-rich 1 (ERICH1), mRNA	IOH25915	ERICH1		126	1687.5	4185	0.11224	0.22334	1.38988	0.08721	1.06352	1.87978
	BC026345.1	Ermin	IOH10790	ERMN		113	3229	438.5	0.10012	0.08365	0.25962	0.06041	2.49886	-0.23423
	NM_004454.1	ets variant gene 5 (ets-related molecule) (ETV5)	IOH5884	ETV5		213.5	2565	385	0.07618	0.09428	0.04775	0.2675	1.88059	-0.26441
	NM_130398.1	exonuclease 1 (EXO1), transcript variant 2	IOH5832	EXO1		161.5	1960	1217	0.00438	0.02381	0.07786	0.16035	1.31725	0.20505
	BC068458.1	Ezrin	IOH61629	EZR		9.5	517	5617	0.2233	0.04377	0.0073	-0.15285	-0.02638	2.68781
	NM_152266.1	chromosome 19 open reading frame 40 (C19orf40)	IOH13579	FAAP24		69.5	843.5	3000	0.76306	0.09808	0.07495	-0.02921	0.27764	1.21113
	BC034497.2	family with sequence similarity 124A (FAM124A)	IOH22342	FAM124A		57.5	1347.5	4859	0.45501	0.01207	0.03318	-0.05394	0.74693	2.26009
	NM_152789.1	family with sequence similarity 133, member B (FAM133B), transcript variant 1	IOH21683	FAM133B		433	3412	11119	0.15351	0.03979	0.03638	0.71979	2.66926	5.79237
	NM_022063.1	chromosome 10 open reading frame 84 (C10orf84)	IOH27864	FAM204A		99	1195	5278	0.21427	0.13965	0.05546	0.03157	0.60494	2.49652
	NM_175923.2	hypothetical protein MGC42630 (MGC42630)	IOH22051	FAM27E3		181.5	2076.5	6020	0.40907	0.17878	0.05803	0.20156	1.42573	2.91521
	NM_014077.1	family with sequence similarity 32, member A (FAM32A)	IOH4219	FAM32A		60.5	726	4190.5	0.01169	0.17532	0.01772	-0.04776	0.16822	1.88288
	NM_004699.1	family with sequence similarity 50, member A (FAM50A)	IOH4655	FAM50A		58	2581	9965	0.09753	0.05425	0.04726	-0.05291	1.89549	5.14122
	BC036056.1	Fanconi anemia, complementation group M (FANCM)	IOH27184	FANCM		592	2254	4898.5	0.0215	0.10666	0.30848	1.0474	1.59101	2.28239
	NM_001997.2	Finkel-Biskis-Reilly murine sarcoma virus (FBR-MuSV) ubiquitously expressed (FAU)	IOH1655	FAU		259.5	1947.5	7131	0.01907	0.02723	0.12117	0.36228	1.30561	3.54209
	BC022361.1	rRNA-processing protein FCF1 homolog	IOH14170	FCF1		539.5	2351	8529	0.04325	0.02707	0.04875	0.93923	1.68133	4.33094
	NM_004111.4	flap structure-specific endonuclease 1 (FEN1)	IOH3530	FEN1		178.5	3778.5	7036	0.01981	0.02377	0.02131	0.19538	3.01053	3.48849
	BC013366.2	UNC-112 related protein 2 (URP2)	IOH27815	FERMT3		38.5	946.5	3701	0.93669	0.02615	0.06916	-0.09309	0.37355	1.60668
	NM_004465	FGF10 Recombinant Human Protein		FGF10		14.5	422	2951.5	0.1463	0	0.12961	-0.14254	-0.11484	1.18377
	NM_004465.1	fibroblast growth factor 10 (FGF10)	IOH40262	FGF10		151	1893	5620.5	0.04683	0.11131	0.00742	0.13872	1.25487	2.68979
	BC022524.1	fibroblast growth factor 12 (FGF12)	IOH10757	FGF12		281.5	2485	5801	0.00251	0.04382	0.08118	0.40762	1.8061	2.79163
	NM_004113.3	fibroblast growth factor 12 (FGF12), transcript variant 2	IOH34727	FGF12		140	2199	7359	0.17173	0.10547	0.00865	0.11605	1.53979	3.67075
	NM_021032.2	fibroblast growth factor 12 (FGF12), transcript variant 1	IOH35339	FGF12		495	2135.5	6791	0.02571	0.04139	0.04144	0.84753	1.48066	3.35025
	NM_004114.2	fibroblast growth factor 13 (FGF13), transcript variant 1A	IOH13832	FGF13		427	2311.5	7123.5	0.06624	0.03824	0.11624	0.70742	1.64454	3.53787
	NM_003868.1	fibroblast growth factor 16 (FGF16)	IOH42157	FGF16		594	3359	10791.5	0.00476	0.01937	0.04475	1.05153	2.61991	5.60758
	NM_003867	FGF17 Recombinant Human Protein		FGF17		148.5	1478	4348	0.03333	0.00287	0.04293	0.13357	0.86845	1.97175
	NM_002007	FGF4 Recombinant Human Protein		FGF4		20.5	863	5240.5	0.03449	0.16387	0.08703	-0.13018	0.29579	2.47537
	NM_020996	FGF6 Recombinant Human Protein		FGF6		96.5	1590.5	5274	0.09526	0.11959	0.06677	0.02642	0.9732	2.49427
	NM_006119.2	Recombinant Human Fibroblast Growth Factor 8b (rhFGF-8b)		FGF8		619.5	5181	3698	0.18149	0.01365	0.2264	1.10407	4.31644	1.60499
	NM_031950.1	fibroblast growth factor binding protein 2 (FGFBP2)	IOH10917	FGFBP2		190	1005.5	3208	0.03722	0.0654	0.03615	0.21908	0.42848	1.3285
	BC021723.2	four and a half LIM domains 5 (FHL5)	IOH11630	FHL5		84	752	3470.5	0.01684	0.13352	0.03525	0.00066	0.19244	1.47662
	BC017724.1	FIP1 like 1 (S. cerevisiae) (FIP1L1)	IOH10317	FIP1L1		174	1988.5	115	0.04064	0.04089	0.0246	0.18611	1.34379	-0.41676
	NM_002013.2	FK506 binding protein 3, 25kDa (FKBP3)	IOH14109	FKBP3		236.5	2810	7726.5	0.09867	0.00906	0.02718	0.31489	2.10872	3.87812
	PV3182	fms-related tyrosine kinase 3 (FLT3); see catalog number for detailed information on wild-type or point mutant status		FLT3	protein kinase	204	1995.5	1117.5	0.01386	0.02303	0.08416	0.24793	1.35031	0.14891
	BC021906.1	formin-like 1 (FMNL1)	IOH25790	FMNL1		79.5	1620.5	1999.5	0.02668	0.02313	0.12625	-0.00861	1.00113	0.64659
	BC040197.1	FBJ murine osteosarcoma viral oncogene homolog B, mRNA (cDNA clone MGC:42291 IMAGE:4816584), complete cds	IOH62215	FOSB		490.5	2980	7328	0.20615	0.07973	0.0056	0.83827	2.26701	3.65326
	BC006192.1	Forkhead box M1, clone MGC:10704 IMAGE:3833837, mRNA, complete cds	IOH6274	FOXM1		145.5	3029.5	3631.5	0.24785	0.0035	0.02745	0.12739	2.31311	1.56746
	NM_005197.2	Forkhead box protein N3	IOH56874	FOXN3		172.5	2421	446.5	0.06149	0.01402	0.09344	0.18302	1.74651	-0.22971
	BC005055.1	forkhead box P1 (FOXP1)	IOH6528	FOXP1		293.5	4466.5	308.5	0.07469	0.00902	0.01604	0.43234	3.65115	-0.30757
	BC018007.1	Chromosome 10 open reading frame 4, mRNA (cDNA clone MGC:24718 IMAGE:4278022), complete cds	IOH13351	FRA10AC1		89	1704	4015	0.17479	0.03735	0.01761	0.01096	1.07888	1.78386
	NM_207350.1	similar to FRG1 protein (FSHD region gene 1 protein) (MGC72104)	IOH40748	FRG1BP		42	1388.5	6262.5	0.10102	0.02903	0.01298	-0.08588	0.7851	3.05204
	NM_024333.1	Fibronectin type III and SPRY domain-containing protein 1	IOH4546	FSD1		81	759.5	3227.5	0	0.09403	0.16278	-0.00552	0.19942	1.3395
	NM_207647.1	fibronectin type III and SPRY domain containing 1-like (FSD1L), transcript variant 1	IOH21757	FSD1L		27.5	618.5	2703	0.12856	0.08574	0.01674	-0.11576	0.06813	1.04354
	P3042	FYN Recombinant Human Protein		FYN	protein kinase	173.5	1791.5	356.5	0.07744	0.08407	0.30347	0.18509	1.16036	-0.28049
	NM_198395.1	GTPase activating protein (SH3 domain) binding protein 1 (G3BP1), transcript variant 2	IOH7337	G3BP1		304	3390.5	9694	0.06978	0.08613	0.01692	0.45398	2.64924	4.98831
	NM_007278.1	GABA(A) receptor-associated protein (GABARAP)	IOH41289	GABARAP		697	4499	10872.5	0.00203	0.1097	0.06003	1.26377	3.68141	5.65329
	NM_031412.1	GABA(A) receptor-associated protein like 1 (GABARAPL1)	IOH14808	GABARAPL1		103	1547.5	3692.5	0.32953	0.12109	0.09632	0.03982	0.93315	1.60189
	NM_006705.2	growth arrest and DNA-damage-inducible, gamma (GADD45G)	IOH3588	GADD45G		88.5	1794	649.5	0.00799	0.01971	0.02286	0.00994	1.16268	-0.11517
	BC013039.1	Growth arrest and DNA-damage-inducible proteins-interacting protein 1	IOH13569	GADD45GIP1		47.5	1670	7835.5	0.2233	0.02286	0.03474	-0.07455	1.04722	3.93962
	BC008668.1	cyclin G associated kinase (GAK)	IOH9808	GAK	protein kinase	495	7671	132	0.11142	0.26529	0.06428	0.84754	6.63498	-0.40717
	NM_174942.1	GAS2-like protein 3	IOH26291	GAS2L3		122	1052	3094.5	0.01159	0.20837	0.13002	0.07896	0.47178	1.26445
	NM_201433.1	Growth arrest-specific 7 (GAS7), transcript variant c, mRNA	IOH36830	GAS7		54	826	3153	0.18332	0.1832	0.09554	-0.06116	0.26134	1.29747
	BC008902.2	GRIP and coiled-coil domain-containing protein 1	IOH46064	GCC1		425	2822	5966.5	0.00998	0.04059	0.11223	0.7033	2.11989	2.88502
	NM_000514	G-DNF		GDNF		72.5	1186	4279	0.24383	0.11567	0.08593	-0.02304	0.59655	1.93283
	NP_954701.1	GDNF Recombinant Human Protein		GDNF		75	974	3900.5	0.01886	0.10599	0.02556	-0.01788	0.39915	1.71925
	NM_002055.1	glial fibrillary acidic protein (GFAP)	IOH9657	GFAP		108	1114	2702	0.02619	0.11552	0.02041	0.05012	0.52951	1.04299
	NM_175571.2	GTPase, IMAP family member 8 (GIMAP8)	IOH44212	GIMAP8		78.5	1017	3232.5	0.04504	0.11403	0.15859	-0.01067	0.43919	1.34233
	NM_022343.2	Golgi-associated plant pathogenesis-related protein 1	IOH59950	GLIPR2		119	2214	8471	0.14261	0.03002	0.05259	0.07279	1.55376	4.29821
	BC064940.1	Nuclear protein NP60	IOH39946	GLYR1		103	1046	3366.5	0.02746	0.08247	0.10481	0.03981	0.46619	1.41793
	BC024184.2	germ cell-less homolog 1 (Drosophila)-like (GMCL1L)	IOH10751	GMCL2		142	1061	3020.5	0.05976	0.012	0.02458	0.12018	0.48016	1.2227
	NM_002070.1	guanine nucleotide binding protein (G protein), alpha inhibiting activity polypeptide 2 (GNAI2)	IOH14604	GNAI2		147	1733	341	0.10583	0.07018	0.04147	0.13048	1.10589	-0.28924
	BC013959.1	guanine nucleotide binding protein-like 1 (GNL1)	IOH14481	GNL1		71.5	676.5	2984	0.06923	0.02822	0.11943	-0.02509	0.12214	1.20211
	BC009250.1	guanine nucleotide binding protein-like 2 (nucleolar) (GNL2)	IOH27775	GNL2		107.5	849	3560.5	0.15129	0.03831	0.08798	0.04908	0.28275	1.5274
	NM_014366.1	guanine nucleotide binding protein-like 3 (nucleolar) (GNL3), transcript variant 1	IOH4189	GNL3		262.5	1415.5	6904	0.34749	0.14237	0.04998	0.36846	0.81025	3.41401
	NM_174931.1	coiled-coil domain containing 75 (CCDC75)	IOH45940	GPATCH11		101	2622	540	0.14002	0.06634	0.01048	0.0357	1.93366	-0.17696
	BC056904.1	cDNA clone MGC:65139 IMAGE:3460089, complete cds	IOH29048	GPATCH4		57.5	857.5	2883.5	0.28284	0.10143	0.07234	-0.05394	0.29068	1.1454
	NM_201592.1	glycoprotein M6A (GPM6A), transcript variant 3	IOH41375	GPM6A		108	1512	6047.5	0.07857	0.02993	0.04595	0.05012	0.9001	2.93072
	NM_133443.1	glutamic pyruvate transaminase (alanine aminotransferase) 2 (GPT2)	IOH40699	GPT2		356.5	5019	4710.5	0.10909	0.0789	0.5958	0.56215	4.1656	2.1763
	NM_001001550.1	growth factor receptor-bound protein 10 (GRB10), transcript variant 3	IOH13204	GRB10		261.5	2162	4397.5	0.04597	0.01962	0.13716	0.3664	1.50534	1.99969
	NM_001030002.1	Growth factor receptor-bound protein 7	IOH55430	GRB7		441.5	2077.5	7524	0.03043	0.01395	0.2795	0.7373	1.42666	3.76385
	NM_198173.1	grainyhead-like 3 (Drosophila) (GRHL3), transcript variant 2	IOH44757	GRHL3		468	3755.5	438.5	0.08159	0.01149	0.07257	0.7919	2.98911	-0.23423
	BC037963.1	Beta-adrenergic receptor kinase 1	IOH25981	GRK2	protein kinase	48	2832	5037.5	0.02946	0.05793	0.00547	-0.07352	2.1292	2.36082
	NM_005307.1	G protein-coupled receptor kinase 4		GRK4	protein kinase	173	1448	4765.5	0.08175	0.31546	0.02893	0.18405	0.84051	2.20734
	NM_005307.1	G protein-coupled receptor kinase 4		GRK4	protein kinase	114	1648	5311	0.08684	0.05492	0.06604	0.06248	1.02674	2.51514
	PV3661	G protein-coupled receptor kinase 6 (GRK6), transcript variant 3		GRK6	protein kinase	39.5	1707.5	4892	0.23272	0.07247	0.04568	-0.09103	1.08214	2.27872
	NM_019884.2	glycogen synthase kinase 3 alpha (GSK3A)	IOH11473	GSK3A	protein kinase	68	453	2742	0.22877	0.0281	0.05261	-0.03231	-0.08597	1.06556
	BC012760.2	Glycogen synthase kinase-3 beta	IOH62834	GSK3B	protein kinase	524.5	2278.5	6965.5	0.05258	0.0239	0.02954	0.90832	1.61382	3.44871
	NM_002095.1	general transcription factor IIE, polypeptide 2, beta 34kDa (GTF2E2)	IOH22963	GTF2E2		361.5	1537.5	3688	0.26798	0.05013	0.0533	0.57246	0.92385	1.59935
	BC000120.1	general transcription factor IIF, polypeptide 1, 74kDa (GTF2F1)	IOH4407	GTF2F1		81.5	745.5	2933	0.04338	0.06924	0.02073	-0.00449	0.18639	1.17333
	NM_012341.2	GTP binding protein 4 (GTPBP4), mRNA	IOH26105	GTPBP4		455.5	2984	7950	0.0357	0.05261	0.00712	0.76615	2.27074	4.00423
	NM_002103.3	glycogen synthase 1 (muscle) (GYS1)	IOH6268	GYS1		705	1757	5726	0.07021	0.04507	0.01013	1.28025	1.12823	2.74932
	BC029046.1	H1 histone family, member 0 (H1F0)	IOH27332	H1-0		211.5	2453	6657	0.05015	0.10493	0.12364	0.26338	1.77631	3.27464
	NM_005319.3	Histone 1, H1c (HIST1H1C), mRNA	IOH5275	H1-2		507.5	3356	10972	0.09893	0.05731	0.09899	0.87329	2.61712	5.70943
	NM_003509.2	histone cluster 1, H2ai (HIST1H2AI)	IOH1642	H2AC13		41	807.5	3123	0.31044	0.13048	0.20378	-0.08793	0.24411	1.28054
	NM_003516.2	histone cluster 2, H2aa3 (HIST2H2AA3)	IOH4867	H2AC18		140.5	1297.5	5028	0.15602	0.00163	0.22558	0.11708	0.70037	2.35546
	NM_003517.2	histone cluster 2, H2ac (HIST2H2AC)	IOH29296	H2AC20		261	1783.5	5192	0.20048	0.04004	0.05039	0.36538	1.15291	2.44799
	NM_003512.3	Histone H2A type 1-C	IOH14485	H2AC6		392.5	1967	6882.5	0.21799	0.29765	0.01469	0.63633	1.32377	3.40188
	NM_170610.2	histone cluster 1, H2ba (HIST1H2BA)	IOH40168	H2BC1		255	1405	7333	0.19965	0.19326	0.04995	0.35301	0.80047	3.65608
	NM_003521.2	histone cluster 1, H2bm (HIST1H2BM)	IOH40169	H2BC14		160	1020	5686.5	0.53917	0.02634	0.19933	0.15726	0.44198	2.72703
	NM_003527.4	Histone H2B type 1-O	IOH58710	H2BC17		163	944	3718.5	0.22558	0.36704	0.00666	0.16345	0.37121	1.61656
	BC098112.1	Histone H2B type 1-N	IOH63324	H2BC21		131.5	1204.5	4023	0.898	0.09569	0.13182	0.09853	0.61377	1.78837
	NM_021062.2	histone cluster 1, H2bb (HIST1H2BB)	IOH35040	H2BC3		55.5	1032.5	3607	0.01274	0.12944	0.0098	-0.05806	0.45362	1.55364
	NM_021063.2	Histone H2B type 1-D	IOH58956	H2BC5		350.5	2571	8453.5	0.09482	0.0341	0.00326	0.5498	1.88618	4.28834
	NM_003524.2	Histone H2B type 1-H	IOH58715	H2BC9		83.5	1069	4673	0.39801	0.21961	0.00272	-0.00037	0.48761	2.15514
	NM_175055.2	histone cluster 3, H2bb (HIST3H2BB)	IOH35043	H2BU1		56.5	849.5	3195.5	0.08761	0.0874	0.00509	-0.056	0.28323	1.32145
	NM_005324.3	H3 histone, family 3B (H3.3B) (H3F3B)	IOH5791	H3-3B		63.5	1014	3117.5	0.10022	0.04184	0.00567	-0.04158	0.43639	1.27744
	NM_021175.1	hepcidin antimicrobial peptide (HAMP)	IOH13487	HAMP		96.5	1101.5	2813.5	0.24181	0.09308	0.07867	0.02642	0.51787	1.10589
	NM_006620.2	HBS1-like (S. cerevisiae) (HBS1L)	IOH4029	HBS1L		265	2314.5	7593.5	0.08005	0.01008	0.01294	0.37362	1.64734	3.80307
	BC064840.1	Histone deacetylase 7	IOH40500	HDAC7		196	1691.5	556.5	0.00722	0.06898	0.11563	0.23144	1.06724	-0.16764
	NM_016073.2	hepatoma-derived growth factor, related protein 3 (HDGFRP3)	IOH10649	HDGFL3		253	2122	5748	0.06149	0.11396	0.00394	0.3489	1.46809	2.76173
	NM_144608.1	hexamthylene bis-acetamide inducible 2 (HEXIM2)	IOH14178	HEXIM2		126	1033.5	3804.5	0.06734	0.13068	0.05074	0.08721	0.45455	1.66508
	NM_001036646.1	HERV-H LTR-associating 3 (HHLA3), mRNA	IOH50127	HHLA3		192	2158.5	0.5	0.20624	0.01867	4.24264	0.2232	1.50208	-0.48138
	NM_013332.1	hypoxia-inducible protein 2 (HIG2), transcript variant 1	IOH4831	HILPDA		23.5	724	3266.5	0.15045	0	0.08681	-0.124	0.16637	1.36151
	NM_018200.2	high-mobility group 20A (HMG20A)	IOH10020	HMG20A		52	737	3695.5	0.38075	0.02303	0.23286	-0.06528	0.17847	1.60358
	NM_002131.2	High mobility group AT-hook 1 (HMGA1), transcript variant 2, mRNA	IOH5224	HMGA1		75	1420	6394.5	0.01886	0.01394	0.05717	-0.01788	0.81444	3.12652
	NM_145899.1	high mobility group AT-hook 1 (HMGA1), transcript variant 1	IOH6516	HMGA1		260	2049	5486.5	0.06527	0.0566	0.07076	0.36332	1.40013	2.61417
	BC000903.2	High mobility group protein B2	IOH2920	HMGB2		442.5	2484	6293.5	0.07511	0.13607	0.09269	0.73936	1.80517	3.06953
	BC021180.2	high-mobility group box 4 (HMGB4)	IOH11041	HMGB4		61.5	884.5	2636	0.05749	0.12871	0.05472	-0.0457	0.31582	1.00574
	BC070154.1	Non-histone chromosomal protein HMG-14	IOH63011	HMGN1		86	1634.5	7659	0.21378	0.01774	0.07404	0.00479	1.01417	3.84003
	NM_004965.3	high-mobility group nucleosome binding domain 1 (HMGN1)	IOH4772	HMGN1		563.5	2425	7512.5	0.01882	0.04782	0.04866	0.98869	1.75023	3.75737
	NM_005517.2	high-mobility group nucleosomal binding domain 2 (HMGN2)	IOH40568	HMGN2		96	1739	6899.5	0.11785	0.00651	0.02162	0.02539	1.11147	3.41147
	NM_138730.1	high mobility group nucleosomal binding domain 3 (HMGN3), transcript variant 2	IOH9857	HMGN3		376	1559.5	6431	0.10155	0.23714	0.09214	0.60234	0.94433	3.14712
	BC008364.1	heterogeneous nuclear ribonucleoprotein C (C1/C2) (HNRPC)	IOH5969	HNRNPC		281	1097.5	4931	0.02516	0.04188	0.13365	0.40658	0.51414	2.30072
	NM_004966.2	heterogeneous nuclear ribonucleoprotein F (HNRPF), transcript variant 3	IOH3987	HNRNPF		279	901.5	2905	0.07603	0.03059	0.00438	0.40246	0.33164	1.15753
	NM_002140.2	heterogeneous nuclear ribonucleoprotein K (HNRPK), transcript variant 1	IOH3670	HNRNPK		51	1606	5726	0.38822	0.14353	0.09361	-0.06734	0.98762	2.74932
	NM_031262.1	Heterogeneous nuclear ribonucleoprotein K (HNRPK), transcript variant 2, mRNA	IOH12922	HNRNPK		82.5	2036.5	3481	0.14571	0.02257	0.13569	-0.00243	1.38849	1.48255
	NM_152510.1	HORMA domain containing 2 (HORMAD2)	IOH22269	HORMAD2		19	1385.5	4891	0.07443	0.03419	0.00665	-0.13327	0.78231	2.27815
	NM_017867.1	chromosome 4 open reading frame 27 (C4orf27)	IOH12106	HPF1		79	1096.5	3055.5	0.0358	0.08835	0.03494	-0.00964	0.51321	1.24245
	NM_005526.1	heat shock transcription factor 1 (HSF1)	IOH13558	HSF1		179	2679.5	47.5	0.0158	0.02982	0.2233	0.19641	1.98721	-0.45485
	NM_006332.1	interferon, gamma-inducible protein 30 (IFI30)	IOH13656	IFI30		200	1714	3964	0.12728	0.05776	0.12808	0.23968	1.08819	1.75508
	NM_012420.1	interferon-induced protein with tetratricopeptide repeats 5 (IFIT5)	IOH22625	IFIT5		89.5	1731.5	5025	0.24492	0.0927	0.00675	0.01199	1.10448	2.35377
	BC001327.1	interferon-related developmental regulator 2 (IFRD2)	IOH3125	IFRD2		165.5	1533.5	6776	0.047	0.13879	0.01336	0.16859	0.92012	3.34178
	BC051031.1	chromosome 11 open reading frame 74 (C11orf74)	IOH26563	IFTAP		306	4858	528	0.02311	0.04163	0.03482	0.4581	4.01569	-0.18373
	NM_138787.1	Uncharacterized protein C11orf74	IOH9947	IFTAP		389	4208.5	359	0.1636	0.06838	0.07091	0.62912	3.41092	-0.27909
	P01344-1	IGF2 / IGFII / Somatomedin-A protein ( NusA Tag )		IGF2		64.5	2095	1014	0.07674	0.00878	0.04742	-0.03952	1.44296	0.09051
	BC009851.1	Clone MGC:15420 IMAGE:4054579, mRNA, complete cds	IOH12351	IGHM		637	3593	7670.5	0.09546	0.04408	0.01097	1.14013	2.8378	3.84652
	NM_201613.1	IKK interacting protein (IKIP), transcript variant 3.1	IOH45918	IKBIP		42	1008.5	4720.5	0.06734	0.07082	0.01902	-0.08588	0.43127	2.18194
	NM_000585	IL15 Recombinant Human Protein		IL15		115.5	1761	247	0.12856	0.07549	0.00573	0.06557	1.13196	-0.34229
	NM_000576.1	interleukin 1, beta (IL1B)	IOH9821	IL1B		350	5035	113.5	0.07273	0.00618	0.05607	0.54876	4.1805	-0.41761
	NM_018724.3	interleukin 20 (IL20)		IL20		238	2581	1468.5	0.19609	0.10301	0.04574	0.31798	1.89548	0.34696
	NM_021803.1	interleukin 21 (IL21)		IL21		126	2845.5	3225.5	0.06734	0.05989	0.08616	0.08721	2.14178	1.33838
	NM_198217.1	Inhibitor of growth protein 1	IOH59743	ING1		109	1424.5	6098	0.14272	0.07198	0.19063	0.05217	0.81862	2.95921
	NM_198219.1	Inhibitor of growth protein 1	IOH59467	ING1		277.5	2493.5	10654.5	0.28794	0.0241	0.08634	0.39937	1.81401	5.53027
	NM_198266.1	inhibitor of growth family, member 3 (ING3), transcript variant 2	IOH44502	ING3		54	1823.5	153	0.15713	0.12215	0.12941	-0.06116	1.19016	-0.39532
	NM_022755.2	inositol 1,3,4,5,6-pentakisphosphate 2-kinase (IPPK)	IOH10937	IPPK		105	1881.5	4652	0.01347	0.13417	0.08056	0.04393	1.24416	2.14329
	NM_001010844.1	Interleukin-1 receptor-associated kinase 1-binding protein 1	IOH43230	IRAK1BP1		148.5	984	5535.5	0.26189	0.18253	0.08571	0.13356	0.40846	2.64182
	NM_002201.3	interferon stimulated exonuclease gene 20kDa (ISG20)	IOH6793	ISG20		190.5	1464	5948.5	0.16703	0.0937	0.14419	0.22011	0.85541	2.87486
	NM_031483.3	E3 ubiquitin-protein ligase Itchy homolog	IOH52904	ITCH		154	1783	4274	0.04592	0.04204	0.0364	0.1449	1.15244	1.93
	NM_021999.2	integral membrane protein 2B (ITM2B)	IOH4165	ITM2B		132.5	1135.5	5403	0.1014	0.05169	0.06282	0.10059	0.54953	2.56705
	BC002424.1	integral membrane protein 2C (ITM2C)	IOH4157	ITM2C		93	1226.5	4757.5	0.31934	0.18622	0.09914	0.01921	0.63426	2.20282
	BC009820.2	chromosome 11 open reading frame 63 (C11orf63)	IOH12615	JHY		163	1957.5	7249.5	0.01735	0.15569	0.00341	0.16345	1.31492	3.60897
	NM_199124.1	chromosome 11 open reading frame 63 (C11orf63), transcript variant 2	IOH43439	JHY		176	3445	4167.5	0.1366	0.09729	0.01917	0.19023	2.69999	1.86991
	BC000166.2	HIV-1 Tat interacting protein, 60kDa (HTATIP)	IOH2928	KAT5		173	2066.5	3863.5	0.04087	0.01334	0.13562	0.18405	1.41642	1.69837
	NM_006388.2	HIV-1 Tat interacting protein, 60kDa (HTATIP), transcript variant 2	IOH39963	KAT5		67.5	1221	2822.5	0.3457	0.03359	0.08393	-0.03334	0.62914	1.11097
	NM_023930.1	potassium channel tetramerisation domain containing 14 (KCTD14)	IOH3701	KCTD14		15	1365.5	2812	0.56569	0.0233	0.02967	-0.14152	0.76369	1.10505
	NM_152387.2	BTB/POZ domain-containing protein KCTD18	IOH53987	KCTD18		644	20352	9921	0.11639	0.20888	0.09052	1.15456	18.4427	5.11639
	NM_018039.2	jumonji domain containing 2D (JMJD2D)	IOH43857	KDM4D		353	1566	4557	0.02404	0.01716	0.13096	0.55495	0.95038	2.08969
	NM_152688.1	KH domain containing, RNA binding, signal transduction associated 2 (KHDRBS2)	IOH22222	KHDRBS2		78	1895	2228.5	0.01813	0.17612	0.18245	-0.0117	1.25673	0.77581
	BC053595.1	chromosome 22 open reading frame 9 (C22orf9)	IOH28970	KIAA0930		122	2312	790	0.08114	0.05505	0.04833	0.07897	1.64501	-0.03589
	BC009415.1	kinesin family member 26A (KIF26A)	IOH14115	KIF26A		135.5	3258	5802.5	0.26614	0.02691	0.00085	0.10678	2.52587	2.79248
	BC031828.1	kinesin heavy chain member 2A (KIF2A)	IOH22203	KIF2A		182.5	2241	8799.5	0.06587	0.13631	0.08285	0.20363	1.57891	4.48357
	BC014924.1	kinesin family member 2C (KIF2C)	IOH25747	KIF2C		159.5	2667.5	7164	0.13743	0.01034	0.11252	0.15623	1.97603	3.56072
	NM_007054.1	kinesin family member 3A (KIF3A)	IOH26900	KIF3A		312.5	1691	4536	0.00226	0.03513	0.03024	0.47149	1.06678	2.07784
	NM_004798.2	kinesin family member 3B (KIF3B)	IOH38253	KIF3B		49	1794.5	2834.5	0.08658	0.13516	0.05164	-0.07145	1.16315	1.11775
	BC000712.1	kinesin family member C1 (KIFC1)	IOH4703	KIFC1		116.5	3124.5	5999.5	0.22457	0.00158	0.0284	0.06763	2.40156	2.90364
	BC041132.1	kinesin family member C3 (KIFC3)	IOH26140	KIFC3		98.5	2614	1288	0.03589	0.03679	0.02855	0.03054	1.92622	0.24512
	NM_005550.2	kinesin family member C3 (KIFC3)	IOH22889	KIFC3		72.5	2542.5	2322	0.12679	0.00584	0.07979	-0.02304	1.85964	0.82856
	PV4132	v-kit Hardy-Zuckerman 4 feline sarcoma viral oncogene homolog (KIT), transcript variant 1; see catalog number for detailed information on wild-type or point mutant status		KIT	protein kinase	167.5	986.5	3420.5	0.13087	0.15124	0.03204	0.17272	0.41079	1.4484
	BC090864.1	Importin subunit alpha-1	IOH62569	KPNA1		43.5	481.5	2640.5	0.21132	0.25993	0.34304	-0.08278	-0.05943	1.00828
	NM_002266.2	Importin subunit alpha-2	IOH54048	KPNA2		86.5	1464	4358	0.04087	0.10143	0.0516	0.00582	0.85541	1.9774
	BC017355.1	karyopherin alpha 3 (importin alpha 4) (KPNA3)	IOH14046	KPNA3		70.5	1115.5	4188	0.11033	0.22503	0.06787	-0.02716	0.5309	1.88148
	NM_012316.2	Importin subunit alpha-7	IOH10787	KPNA6		141.5	1799	2392	0.03498	0.14464	0.15786	0.11915	1.16734	0.86806
	BC012131.1	chromosome 14 open reading frame 149 (C14orf149)	IOH13142	L3HYPDH		226	3851	7534	0.19399	0.03379	0.22075	0.29325	3.07803	3.7695
	BC015586.2	laminin, gamma 1 (formerly LAMB2) (LAMC1)	IOH46065	LAMC1		165.5	1319	3668.5	0.14099	0.08899	0.00559	0.16859	0.72039	1.58834
	NM_018697.3	LanC lantibiotic synthetase component C-like 2 (bacterial) (LANCL2)	IOH37734	LANCL2		13.5	1689	719	0.05238	0.01507	0.10818	-0.1446	1.06491	-0.07594
	BC033856.1	La ribonucleoprotein domain family, member 1 (LARP1)	IOH21797	LARP1		498.5	2761.5	8001	0.0156	0.1713	0.17622	0.85475	2.06356	4.03301
	BC030516.1	La ribonucleoprotein domain family, member 2 (LARP2)	IOH21650	LARP1B		622	2433.5	7542.5	0.08413	0.02935	0.20128	1.10922	1.75814	3.77429
	NM_199188.1	La ribonucleoprotein domain family, member 4 (LARP4), transcript variant 2	IOH38224	LARP4		344.5	2279.5	7004.5	0.22373	0.05553	0.14608	0.53743	1.61475	3.47072
	NM_199190.1	La ribonucleoprotein domain family, member 4 (LARP4), transcript variant 3	IOH42760	LARP4		911.5	2537	9119.5	0.43675	0.04125	0.08847	1.70574	1.85451	4.66413
	NM_018357.2	La ribonucleoprotein domain family, member 6 (LARP6), transcript variant 1	IOH6558	LARP6		515.5	3018.5	5692	0.11385	0.01429	0.02236	0.88978	2.30286	2.73013
	NM_016648.1	La ribonucleoprotein domain family, member 7 (LARP7), transcript variant 1	IOH41297	LARP7		121	2445.5	6748	0.39738	0.07431	0.16955	0.0769	1.76932	3.32599
	BC015665.2	LATS, large tumor suppressor, homolog 1 (Drosophila) (LATS1)	IOH40642	LATS1	protein kinase	92.5	2696	574.5	0.45102	0.00525	0.04062	0.01818	2.00257	-0.15748
	NM_181714.1	Leber congenital amaurosis 5 (LCA5)	IOH26433	LCA5		96	1483.5	3441	0.05893	0.04623	0.11631	0.02539	0.87356	1.45998
	NM_032563.1	late cornified envelope 3D (LCE3D)	IOH40397	LCE3D		129	1394	4694	0.0877	0.03551	0.15064	0.09338	0.79023	2.16699
	NM_005356.2	lymphocyte-specific protein tyrosine kinase (LCK), transcript variant 2		LCK	protein kinase	209.5	3074.5	475	0.02363	0.01035	0.00298	0.25926	2.355	-0.21363
	NM_001290.1	LIM domain binding 2 (LDB2)	IOH23054	LDB2		188.5	1070	5077	0.12379	0.15199	0.00056	0.21599	0.48854	2.38311
	BC010929.1	LIM domain binding 3 (LDB3)	IOH12868	LDB3		32.5	709	4658.5	0.4569	0.02194	0.0976	-0.10546	0.1524	2.14696
	NM_024316.1	leukocyte receptor cluster (LRC) member 1 (LENG1)	IOH12150	LENG1		1906	17634.5	11596.5	0.08088	0.0723	0.04909	3.75494	15.9124	6.06181
	NM_002309.2	leukemia inhibitory factor (cholinergic differentiation factor) (LIF)	IOH34705	LIF		102.5	2240	5823.5	0.03449	0.03788	0.03193	0.03878	1.57797	2.80433
	NM_013975.1	ligase III, DNA, ATP-dependent (LIG3), nuclear gene encoding mitochondrial protein, transcript variant alpha	IOH40893	LIG3		284	3109	10621.5	0.05478	0.11918	0.06704	0.41276	2.38713	5.51165
	BC023546.2	LIM and calponin homology domains 1 (LIMCH1)	IOH29323	LIMCH1		73.5	3112.5	-46	0.0481	0.05657	-0.18446	-0.02097	2.39039	-0.50761
	PV4337	LIM domain kinase 1		LIMK1	protein kinase	281.5	2037	4724.5	0.10299	0.06595	0.05942	0.40762	1.38895	2.18421
	BC001370.2	LIM and senescent cell antigen-like domains 2 (LIMS2)	IOH3980	LIMS2		57	850	3280	0.04962	0.0965	0.07804	-0.05497	0.28368	1.36912
	NM_001008234.1	hypothetical gene supported by BC036588, mRNA (cDNA clone MGC:42159 IMAGE:4799429), complete cds.	IOH58628	LINC00909		293	1079.5	2953.5	0.26547	0.07009	0.051	0.43131	0.49739	1.1849
	BC034401.1	cDNA clone IMAGE:5172086, partial cds	IOH22782	LINC00919		131.5	1011.5	5328	0.02689	0.10136	0.02177	0.09854	0.43406	2.52473
	NM_032338.2	chromosome 12 open reading frame 31 (C12orf31)	IOH7537	LLPH		241	1771	4353	0.17604	0.06548	0.01494	0.32417	1.14127	1.97458
	NM_170707.1	Lamin-A/C	IOH41769	LMNA		61.5	2158	6351.5	0.03449	0.01704	0.15041	-0.0457	1.50162	3.10226
	BC080187.1	Leiomodin-1	IOH62553	LMOD1		34	985	6166	0.20797	0.07466	0.01078	-0.10237	0.40939	2.99759
	XM_379117.1	PREDICTED: Homo sapiens hypothetical protein LOC150568 (LOC150568)	IOH43619	LOC150568		68.5	1527	6166.5	0.19613	0.0176	0.0219	-0.03127	0.91407	2.99787
	NM_194290.1	cDNA FLJ42001 fis, clone SPLEN2029912 (LOC153684 protein) [Source:UniProtKB/TrEMBL;Acc:Q6ZVW3]	IOH42276	LOC153684		541.5	3113	8974.5	0.19979	0.14855	0.07651	0.94335	2.39086	4.58231
	XM_088679.2	Spermatid nuclear transition protein 4	IOH43003	LOC158812		572.5	2774.5	5394.5	0.07287	0.11188	0.01927	1.00723	2.07566	2.56225
	BC005043.1	hypothetical protein MGC31957 (MGC31957)	IOH6656	LOC254896		521	980	4569.5	0.21172	0.35644	0.02584	0.90111	0.40474	2.09675
	XM_378514.1	PREDICTED: Homo sapiens hypothetical protein LOC283663 (LOC283663), mRNA	IOH42688	LOC283663		984.5	6358	11306	0.15873	0.08475	0.08969	1.85616	5.4124	5.8979
	XM_294794.1	PREDICTED: Homo sapiens similar to putative membrane-bound dipeptidase 2 (LOC339065)	IOH42923	LOC339065		181.5	1493	4828	0.01948	0.06441	0.0952	0.20156	0.88241	2.24261
	XM_293034.2	UPF0566 protein	IOH41557	LOC344405		18	374	4332.5	0.15713	0.02647	0.10005	-0.13533	-0.15953	1.96302
	XM_374803.1	LINE-1 reverse transcriptase homolog	IOH42807	LOC399763		132	2721	99.5	0.04285	0.02807	0.1066	0.09957	2.02585	-0.42551
	BC017168.1	leucine rich repeat containing 59 (LRRC59)	IOH10008	LRRC59		70	1256.5	5789	0	0.1345	0.00831	-0.02818	0.66219	2.78486
	NM_012472.1	leucine rich repeat containing 6 (LRRC6)	IOH26570	LRRC6		79	2755	6758.5	0.73396	0.07854	0.10222	-0.00964	2.0575	3.33191
	NM_182597.1	Coiled-coil domain-containing transmembrane protein C7orf53	IOH44503	LSMEM1		36.5	1021.5	4145	0.2131	0.18759	0.01365	-0.09721	0.44338	1.85721
	BC017163.1	LUC7-like 2 (S. cerevisiae) (LUC7L2)	IOH10096	LUC7L2		85	910	3571.5	0.21629	0.35433	0.32806	0.00273	0.33956	1.53361
	BC042625.1	LUC7-like 2 (S. cerevisiae) (LUC7L2)	IOH27415	LUC7L2		169	1687	5515	0.11715	0.06539	0.00744	0.17581	1.06305	2.63025
	BC036923.1	chromosome 9 open reading frame 150 (C9orf150)	IOH25928	LURAP1L		121.5	1753	1395	0.05238	0.04679	0.04055	0.07794	1.12451	0.30549
	NM_006439.3	Protein mab-21-like 2	IOH12221	MAB21L2		292.5	2754.5	5616	0.07978	0.0403	0.06371	0.43028	2.05704	2.68724
	BC013331.1	H2A histone family, member Y (H2AFY)	IOH13858	MACROH2A1		86	1113.5	3428	0.11511	0.08192	0.02228	0.00479	0.52904	1.45264
	NM_018649.1	H2A histone family, member Y2 (H2AFY2)	IOH10067	MACROH2A2		117	961	4713.5	0.18131	0.11037	0.02985	0.06866	0.38704	2.178
	NM_005362.2	Melanoma-associated antigen 3	IOH3602	MAGEA3		182.5	1906.5	1350	0.01937	0.01743	0.13828	0.20363	1.26743	0.2801
	NM_002363.1	melanoma antigen family B, 1 (MAGEB1), transcript variant 1	IOH10928	MAGEB1		218	2096.5	5266	0.05838	0.1312	0.13186	0.27677	1.44435	2.48975
	NM_002364.1	melanoma antigen family B, 2 (MAGEB2)	IOH11315	MAGEB2		122	2947	11135.5	0.04637	0.10701	0.01886	0.07897	2.23629	5.80169
	BC032852.2	melanoma antigen family B, 4 (MAGEB4)	IOH27153	MAGEB4		757.5	4399	11387	0.02334	0.03279	0.06371	1.38843	3.5883	5.9436
	NM_014061.3	melanoma antigen family H, 1 (MAGEH1)	IOH10824	MAGEH1		276.5	2814.5	5377.5	0.09974	0.04246	0.02485	0.39731	2.11291	2.55267
	NM_181509.1	microtubule-associated protein 1 light chain 3 alpha (MAP1LC3A), transcript variant 2	IOH42908	MAP1LC3A		35.5	1844	214.5	0.17927	0.0115	0.24724	-0.09927	1.20924	-0.36062
	NM_145109.1	mitogen-activated protein kinase kinase 3 (MAP2K3), transcript variant B	IOH21715	MAP2K3	protein kinase	32.5	1668	2762.5	0.02176	0	0.0837	-0.10545	1.04536	1.07712
	NM_002401.2	Mitogen-activated protein kinase kinase kinase 3		MAP3K3	protein kinase	220	2070.5	857	0.32141	0.10416	0.06601	0.2809	1.42014	0.00192
	NM_004635.2	mitogen-activated protein kinase-activated protein kinase 3 (MAPKAPK3)	IOH3889	MAPKAPK3	protein kinase	171.5	2142	6287	0.01237	0.01849	0.05511	0.18096	1.48672	3.06587
	NM_003668.2	mitogen-activated protein kinase-activated protein kinase 5 (MAPKAPK5), transcript variant 1		MAPKAPK5	protein kinase	178	1925.5	7836	0.07945	0.16195	0.0388	0.19436	1.28512	3.9399
	BC035021.1	membrane-associated ring finger (C3HC4) 10 (RNF190)	IOH27103	MARCHF10		190.5	2669.5	596	0.07053	0.04847	0.13762	0.22011	1.97789	-0.14535
	PV4395	Serine/threonine-protein kinase MARK1		MARK1	protein kinase	117	1903	3011.5	0.45932	0.09066	0.16413	0.06866	1.26418	1.21762
	PV3878	MAP/microtubule affinity-regulating kinase 2 (MARK2), transcript variant 3		MARK2	protein kinase	99.5	2183.5	3768.5	0.06396	0.02882	0.13454	0.0326	1.52536	1.64477
	PV4819	MAP/microtubule affinity-regulating kinase 3 (MARK3)		MARK3	protein kinase	29	2359	1953	0.43889	0.07614	0.01521	-0.11266	1.68877	0.62035
	PV3851	MAP/microtubule affinity-regulating kinase 4		MARK4	protein kinase	94.5	1364	2951.5	0.02245	0.00518	0.05007	0.0223	0.76229	1.18377
	NM_004990.2	methionyl-tRNA synthetase (MARS)	IOH3655	MARS1		40	915.5	3788	0.14142	0.09191	0.06011	-0.09	0.34468	1.65577
	NM_138395.2	methionyl-tRNA synthetase 2, mitochondrial (MARS2), nuclear gene encoding mitochondrial protein	IOH43092	MARS2		58.5	668.5	3571	0.03626	0.0476	0.04792	-0.05188	0.11469	1.53333
	NM_139355.1	megakaryocyte-associated tyrosine kinase (MATK), transcript variant 1	IOH4506	MATK	protein kinase	419	2796.5	6133.5	0.19576	0.00784	0.07367	0.69094	2.09615	2.97925
	PV3370	megakaryocyte-associated tyrosine kinase (MATK), transcript variant 2		MATK	protein kinase	13	1655	2617.5	0.54393	0.03076	0.07699	-0.14564	1.03326	0.9953
	NM_001025092.1	Myelin basic protein (MBP), transcript variant 4, mRNA	IOH63097	MBP		607.5	2221	4908	0.02677	0.1127	0.01498	1.07935	1.56028	2.28775
	BC009108.1	cDNA clone IMAGE:3451214 (MCM10)	IOH10191	MCM10		543	4227	6048	0.1146	0.09134	0.03858	0.94644	3.42814	2.931
	BC009398.1	minichromosome maintenance complex component 7 (MCM7)	IOH14462	MCM7		72.5	2144.5	278.5	0.26334	0.03924	0.01777	-0.02304	1.48905	-0.3245
	BC030702.1	microcephaly, primary autosomal recessive 1 (MCPH1)	IOH22356	MCPH1		176.5	1423	4931	0.01202	0.08746	0.00402	0.19126	0.81723	2.30072
	NM_006337.3	microspherule protein 1 (MCRS1), transcript variant 1	IOH12378	MCRS1		233	1901.5	5285.5	0.04856	0.0383	0.09351	0.30768	1.26278	2.50075
	NM_002391.1	midkine (neurite growth-promoting factor 2) (MDK), transcript variant 3	IOH13794	MDK		58.5	682	3080.5	0.18131	0.26128	0.19947	-0.05188	0.12726	1.25656
	BC046912.1	magnesium-dependent phosphatase 1 (MDP-1)	IOH26890	MDP1		81	2071.5	46.5	0.01746	0.06861	0.16727	-0.00552	1.42107	-0.45542
	NM_022756.2	Uncharacterized protein C1orf149	IOH13235	MEAF6		329	3312	10126.5	0.12036	0.00043	0.00244	0.5055	2.57615	5.23235
	NM_006838.1	methionyl aminopeptidase 2 (METAP2)	IOH11106	METAP2		333	2095.5	9058.5	0.04672	0.02328	0.03521	0.51374	1.44342	4.62971
	NM_005371.2	methyltransferase like 1 (METTL1), transcript variant 1	IOH4172	METTL1		1075.5	3041	11719.5	0.03616	0.02186	0.08598	2.04367	2.32381	6.13122
	NM_020961.2	KIAA1627 protein (KIAA1627)	IOH6104	METTL14		91	995	2979.5	0.04662	0.06396	0.05197	0.01509	0.4187	1.19957
	BC050603.1	Putative methyltransferase METT10D	IOH27069	METTL16		57.5	886	3133	0.13527	0.02554	0.0325	-0.05394	0.31721	1.28618
	XM_003960444.1	Hypothetical protein MGC21881 (MGC21881), mRNA	IOH50171	MGC21881		219	1787.5	6594	0.03875	0.00198	0.01523	0.27884	1.15663	3.23909
	NM_138798.1	MIT, microtubule interacting and transport, domain containing 1 (MITD1)	IOH10640	MITD1		16	491	2727.5	0.61872	0.02016	0.10344	-0.13946	-0.05059	1.05737
	BC002755.1	MAP kinase-interacting serine/threonine-protein kinase 1		MKNK1	protein kinase	62	2209.5	7324.5	0.25091	0.13729	0.09181	-0.04466	1.54957	3.65128
	BC036089.1	myeloid/lymphoid or mixed-lineage leukemia (trithorax homolog, Drosophila); translocated to, 3 (MLLT3)	IOH27267	MLLT3		59.5	1000	3305.5	0.05942	0.11455	0.06097	-0.04982	0.42336	1.38352
	BC064612.1	myeloid/lymphoid or mixed-lineage leukemia (trithorax homolog, Drosophila); translocated to, 6 (MLLT6)	IOH39905	MLLT6		354	2613	8237	0.0759	0.09038	0.03314	0.557	1.92528	4.16618
	BC022471.1	myelin-associated oligodendrocyte basic protein (MOBP)	IOH11199	MOBP		121.5	1292.5	4913.5	0.01746	0.10559	0.06663	0.07793	0.69571	2.29085
	NM_006792.2	mortality factor 4 (MORF4), mRNA.	IOH58223	MORF4		106.5	2023	5101	0.04648	0.06152	0.07014	0.04702	1.37591	2.39665
	BC057760.1	MORN repeat-containing protein 3	IOH29220	MORN3		293	2013	4885.5	0.0724	0.1939	0.01636	0.43131	1.3666	2.27505
	NM_001932.2	membrane protein, palmitoylated 3 (MAGUK p55 subfamily member 3) (MPP3), transcript variant 1	IOH29065	MPP3		108.5	2991.5	69.5	0.03259	0.06878	0.64097	0.05115	2.27772	-0.44244
	NM_022474.2	membrane protein, palmitoylated 5 (MAGUK p55 subfamily member 5) (MPP5)	IOH44175	MPP5		118	2864	2755.5	0.01198	0.00593	0.13575	0.07072	2.159	1.07317
	BC038105.2	membrane protein, palmitoylated 7 (MAGUK p55 subfamily member 7) (MPP7)	IOH27173	MPP7		218.5	2350.5	4530	0.00324	0.00752	0.0359	0.2778	1.68086	2.07445
	NM_018270.3	MRG-binding protein	IOH14702	MRGBP		29	734	4236	0.1463	0.04817	0.03272	-0.11267	0.17568	1.90856
	NM_006428.3	mitochondrial ribosomal protein L28 (MRPL28), nuclear gene encoding mitochondrial protein	IOH40570	MRPL28		484	4258.5	7327	0.07013	0.01212	0.06543	0.82488	3.45747	3.6527
	NM_001545.1	immature colon carcinoma transcript 1 (ICT1)	IOH11951	MRPL58		345.5	1850	5549	0.07982	0.00917	0.07544	0.53949	1.21483	2.64944
	NM_022839.2	mitochondrial ribosomal protein S11 (MRPS11), nuclear gene encoding mitochondrial protein, transcript variant 1	IOH1783	MRPS11		204.5	1470	3184	0.22475	0.03367	0.11637	0.24895	0.86099	1.31495
	NM_032476.1	mitochondrial ribosomal protein S6 (MRPS6), nuclear gene encoding mitochondrial protein	IOH13845	MRPS6		219.5	2740	8826	0.11919	0.20336	0.05079	0.27986	2.04354	4.49852
	NM_018133.2	male-specific lethal 2-like 1 (Drosophila) (MSL2L1)	IOH38005	MSL2		69	779	2909	0.0205	0.17428	0.11911	-0.03025	0.21758	1.15978
	NM_006800.2	male-specific lethal 3-like 1 (Drosophila) (MSL3L1), transcript variant 3	IOH45528	MSL3		89	1736.5	1986.5	0.28602	0.17632	0.02527	0.01097	1.10914	0.63925
	NM_078630.1	male-specific lethal 3-like 1 (Drosophila) (MSL3L1), transcript variant 2	IOH37755	MSL3		87.5	1252.5	4483.5	0.04041	0.19026	0.04306	0.00788	0.65847	2.04821
	NM_005259.1	myostatin (MSTN)	IOH44374	MSTN		624.5	3476	7069.5	0.21853	0.00488	0.03351	1.11438	2.72886	3.50739
	NM_178812.2	Metadherin (MTDH), mRNA	IOH25883	MTDH		39	1330	6572.5	0.03626	0.08188	0.11049	-0.09206	0.73063	3.22696
	NM_152912.3	mitochondrial translational initiation factor 3 (MTIF3)	IOH26907	MTIF3		104	1083.5	4240.5	0.28556	0.13509	0.16892	0.04187	0.50111	1.9111
	NM_016487.1	chromosome 6 open reading frame 203 (C6orf203)	IOH12876	MTRES1		128.5	1106.5	4055	0.14857	0.04282	0.00802	0.09235	0.52253	1.80643
	NM_079420.1	myosin, light chain 1, alkali; skeletal, fast (MYL1), transcript variant 1f	IOH42932	MYL1		79	2352	83	0.0358	0.04389	0.08519	-0.00964	1.68226	-0.43482
	NM_021019.2	myosin, light chain 6, alkali, smooth muscle and non-muscle (MYL6), transcript variant 1	IOH22891	MYL6		137.5	2461.5	202	0.00514	0.00546	0.07001	0.1109	1.78422	-0.36767
	NM_079424.1	Myosin light polypeptide 6	IOH45798	MYL6		178	4054	94	0.10329	0.01151	0.12036	0.19436	3.26706	-0.42861
	NM_181526.1	myosin, light chain 9, regulatory (MYL9), transcript variant 2, mRNA.	IOH5278	MYL9		123.5	4672	1930.5	0.02863	0.06448	0.08095	0.08205	3.84249	0.60766
	BC021187.1	DKFZP434K028 protein (DKFZP434K028)	IOH10893	MYRF-AS1		461	2116	4532.5	0.05522	0.05881	0.00983	0.77748	1.46251	2.07587
	NM_024068.1	oligonucleotide/oligosaccharide-binding fold containing 2B (OBFC2B)	IOH6654	NABP2		331	2307	10269	0.09827	0.03494	0.06845	0.50961	1.64036	5.31275
	BC026325.1	nucleosome assembly protein 1-like 2 (NAP1L2)	IOH11158	NAP1L2		125	840	3611.5	0.09051	0.07239	0.02526	0.08514	0.27438	1.55618
	NM_144736.3	Protein midA homolog, mitochondrial	IOH40597	NDUFAF7		356	1535.5	5819	0.22246	0.10269	0.04083	0.56113	0.92199	2.80178
	BC010876.1	nei endonuclease VIII-like 1 (E. coli) (NEIL1)	IOH9862	NEIL1		80.5	1416	5661	0.09662	0.04794	0.02223	-0.00655	0.81072	2.71263
	NM_133494.1	NIMA (never in mitosis gene a)- related kinase 7 (NEK7)	IOH45126	NEK7	protein kinase	220	2337	7992	0.2057	0.05688	0.03911	0.2809	1.66829	4.02793
	NM_005663.2	Wolf-Hirschhorn syndrome candidate 2 (WHSC2)	IOH46152	NELFA		198	2113.5	2605.5	0.09285	0.14821	0.51211	0.23557	1.46018	0.98853
	NM_002904.4	RD RNA binding protein (RDBP)	IOH14621	NELFE		372.5	4570	7293.5	0.16895	0.40353	0.09647	0.59513	3.74752	3.63379
	NM_002503.2	nuclear factor of kappa light polypeptide gene enhancer in B-cells inhibitor, beta (NFKBIB), transcript variant 1	IOH11051	NFKBIB		125.5	1294	6001	0.1634	0.02732	0.01862	0.08618	0.69711	2.90449
	NM_018297.2	N-glycanase 1 (NGLY1)	IOH6809	NGLY1		79	3391.5	527	0.0179	0.02773	0.07514	-0.00964	2.65017	-0.18429
	BC005403.1	Uncharacterized protein C11orf57	IOH61712	NKAPD1		601.5	2782	8742	0.09992	0.03508	0.00971	1.06699	2.08265	4.45113
	BC068514.1	NF-kappaB repressing factor (NKRF)	IOH40543	NKRF		320.5	2391	6041	0.07281	0.0207	0.28256	0.48798	1.71857	2.92706
	NM_022787.2	nicotinamide nucleotide adenylyltransferase 1 (NMNAT1)	IOH13215	NMNAT1		20.5	579	3294	0.10348	0.07083	0.01159	-0.13018	0.03135	1.37703
	NM_021079.2	N-myristoyltransferase 1 (NMT1)	IOH14141	NMT1		70.5	2444	5029.5	0.31093	0.40795	0.1666	-0.02715	1.76792	2.3563
	NM_014062.1	NIN1/RPN12 binding protein 1 homolog (S. cerevisiae) (NOB1)	IOH39919	NOB1		111	2006.5	4460	0.01274	0.02643	0.06247	0.0563	1.36055	2.03496
	NM_024313.1	nucleolar protein 12 (NOL12)	IOH5392	NOL12		140.5	1615.5	6803.5	0.05536	0.05734	0.01237	0.11708	0.99647	3.35731
	BC065370.1	chromosome 20 open reading frame 112 (C20orf112)	IOH40687	NOL4L		17.5	444.5	3971	0.04041	0.03341	0.04772	-0.13636	-0.09388	1.75903
	NM_016167.3	nucleolar protein 7, 27kDa (NOL7)	IOH40609	NOL7		113.5	1508.5	4516	0.38003	0.08672	0.10209	0.06145	0.89684	2.06655
	BC006769.1	nucleolar and coiled-body phosphoprotein 1 (NOLC1)	IOH3146	NOLC1		361	2391	10580.5	0.04701	0.08162	0.04939	0.57142	1.71857	5.48853
	BC040106.1	hypothetical protein HSPC111 (HSPC111)	IOH26285	NOP16		368	2419	6629.5	0.12298	0.04619	0.01867	0.58586	1.74464	3.25912
	NM_001039724.1	Nostrin	IOH63165	NOSTRIN		334.5	3079	7980	0.11204	0.07762	0.01666	0.51682	2.3592	4.02116
	NM_002515.2	neuro-oncological ventral antigen 1 (NOVA1), transcript variant 1	IOH45733	NOVA1		68	704.5	2765	0.06239	0.01706	0.01483	-0.03231	0.14821	1.07853
	NM_207181.1	Nephrocystin-1	IOH60410	NPHP1		60	1961.5	2865.5	0.09428	0.0292	0.01604	-0.04879	1.31865	1.13524
	BC009623.1	nucleophosmin (nucleolar phosphoprotein B23, numatrin) (NPM1)	IOH9844	NPM1		90	1255	5906	0.40855	0.00789	0.05938	0.01303	0.6608	2.85088
	BC021983.1	nucleophosmin (nucleolar phosphoprotein B23, numatrin) (NPM1)	IOH27884	NPM1		99.5	1531.5	4019.5	0.12081	0.1556	0.10925	0.0326	0.91826	1.7864
	BC068078.1	nucleophosmin/nucleoplasmin, 2 (NPM2)	IOH40781	NPM2		19	863	2691.5	0.52103	0.08849	0.37753	-0.13327	0.29579	1.03706
	NM_207285.1	AAA1 protein (AAA1), transcript variant III, mRNA	IOH50066	NPSR1-AS1		444.5	2245	6891.5	0.01114	0.13481	0.11584	0.74348	1.58262	3.40696
	NM_207286.1	AAA1 protein (AAA1), transcript variant IV, mRNA	IOH50103	NPSR1-AS1		483.5	2500	7152.5	0.28518	0.02659	0.03608	0.82384	1.82007	3.55423
	NM_207288.1	AAA1 protein (AAA1), transcript variant VI, mRNA	IOH50123	NPSR1-AS1		16	275.5	3229	0.26517	0.05903	0.01445	-0.13945	-0.25125	1.34035
	NM_133332.1	Wolf-Hirschhorn syndrome candidate 1 (WHSC1), transcript variant 5	IOH38113	NSD2		471.5	1324.5	4689	0.03149	0.18846	0.08083	0.79912	0.72551	2.16417
	NM_133336.1	Wolf-Hirschhorn syndrome candidate 1 (WHSC1), transcript variant 9	IOH42549	NSD2		196.5	1820.5	6292	0.01799	0.05088	0.0463	0.23247	1.18736	3.06868
	NM_032141.1	coiled-coil domain containing 55 (CCDC55), transcript variant 1	IOH43707	NSRP1		417	4916	9995	0.27809	0.07882	0.17587	0.68681	4.0697	5.15814
	BC001396.1	chromosome 9 open reading frame 32 (C9orf32)	IOH3939	NTMT1		60	1049.5	3289	0.16499	0.00202	0.07611	-0.04879	0.46945	1.3742
	NM_138285.3	Nucleoporin NUP53	IOH56483	NUP35		50	3780	256	0.3677	0.0318	0.03867	-0.06939	3.01193	-0.3372
	NM_153645.1	nucleoporin 50kDa (NUP50), transcript variant 3	IOH11663	NUP50		76	670.5	4976.5	0.07443	0.07909	0.01634	-0.01582	0.11655	2.32639
	BC017799.1	nucleoporin 62kDa C-terminal like (NUP62CL)	IOH14286	NUP62CL		172.5	1500	5680.5	0.10248	0.35827	0.01008	0.18302	0.88893	2.72363
	BC012887.1	Nucleolar and spindle-associated protein 1	IOH25768	NUSAP1		566.5	3696.5	8298	0.11858	0.03462	0.05164	0.99487	2.93417	4.20059
	NM_016359.2	Nucleolar and spindle associated protein 1 (NUSAP1), transcript variant 1, mRNA	IOH45439	NUSAP1		905	2618	8273.5	0.0125	0.00918	0.19307	1.69236	1.92994	4.18676
	NM_018454.4	nucleolar and spindle associated protein 1 (NUSAP1), transcript variant 2	IOH3087	NUSAP1		140	685	2873	0.07071	0.68543	0.381	0.11606	0.13005	1.13947
	NM_016816.1	2',5'-oligoadenylate synthetase 1, 40/46kDa (OAS1), transcript variant 1	IOH41283	OAS1		265.5	7247	4044	0.01332	0.00527	0.05106	0.37465	6.24018	1.80022
	NM_024578.1	occludin/ELL domain containing 1 (OCEL1)	IOH23128	OCEL1		94	1568.5	3245.5	0.09027	0.12938	0.20807	0.02127	0.95271	1.34965
	BC094726.1	Inositol polyphosphate 5-phosphatase OCRL-1	IOH62681	OCRL		123.5	2985	6535	0.12024	0.05259	0.0396	0.08206	2.27167	3.2058
	BC104469.1	Outer dense fiber protein 3-like protein 2	IOH63631	ODF3L2		227.5	1130	2889.5	0.13987	0.31413	0.20727	0.29635	0.54441	1.14878
	BC069092.1	Olfactory receptor, family 1, subfamily A, member 2, mRNA (cDNA clone MGC:95367 IMAGE:7216906), complete cds	IOH63641	OR1A2		104.5	1825.5	3196	0.0609	0.09335	0.05575	0.0429	1.19202	1.32172
	NM_020530.2	oncostatin M (OSM)	IOH13456	OSM		218.5	1171.5	4516.5	0.26213	0.07666	0.10662	0.2778	0.58305	2.06684
	NM_012383.2	osteoclast stimulating factor 1 (OSTF1)	IOH7180	OSTF1		257.5	2213	890	0.05767	0.07988	0.11282	0.35817	1.55283	0.02054
	BC029760.1	OTU domain containing 6B (OTUD6B)	IOH22119	OTUD6B		260.5	3666	12669	0.00814	0.04166	0.08595	0.36435	2.90578	6.66698
	BC001716.1	poly(A) binding protein interacting protein 2 (PAIP2)	IOH4447	PAIP2		238	4173	1832	0.00594	0.08303	0.1073	0.31798	3.37786	0.55207
	BC039337.1	Polyadenylate-binding protein-interacting protein 2	IOH62273	PAIP2		469.5	4645.5	1907.5	0.02259	0.09331	0.08118	0.795	3.81783	0.59468
	BC010907.1	PAK1 interacting protein 1 (PAK1IP1)	IOH12088	PAK1IP1		132.5	1292.5	6195.5	0.02668	0.1778	0.10763	0.1006	0.69572	3.01423
	NM_005884.2	p21(CDKN1A)-activated kinase 4 (PAK4), transcript variant 1		PAK4	protein kinase	407	1646	7426	0.24323	0.16496	0.08532	0.66622	1.02488	3.70856
	NM_005884.2	p21(CDKN1A)-activated kinase 4 (PAK4), transcript variant 1	IOH2475	PAK4	protein kinase	317	2717	9458.5	0.29444	0.05934	0.00755	0.48077	2.02212	4.85542
	NM_020168.3	p21(CDKN1A)-activated kinase 6 (PAK6)	IOH20961	PAK6	protein kinase	310	2569	5113	0.05931	0.04679	0.19555	0.46634	1.88432	2.40341
	BC052966.1	poly (ADP-ribose) glycohydrolase (PARG)	IOH28846	PARG		199	1540	6152.5	0.00711	0.03306	0.16401	0.23762	0.92617	2.98997
	NM_032403.1	protocadherin gamma subfamily C, 3 (PCDHGC3), transcript variant 3	IOH6540	PCDHGC3		109.5	2403.5	6154	0.10978	0.01618	0.03355	0.05321	1.73021	2.99082
	BC001304.1	piccolo (presynaptic cytomatrix protein) (PCLO)	IOH45994	PCLO		278.5	4394.5	7177	0.16503	0.0214	0.11606	0.40143	3.58411	3.56806
	NM_014891.1	PDGFA associated protein 1 (PDAP1)	IOH4282	PDAP1		76.5	1418	9145.5	0.08319	0.14262	0.06858	-0.01479	0.81258	4.6788
	BC026104.2	programmed cell death 4 (neoplastic transformation inhibitor) (PDCD4)	IOH11605	PDCD4		92.5	1633	366	0.12995	0.11605	0.08114	0.01818	1.01277	-0.27513
	NM_002608.1	platelet-derived growth factor beta polypeptide (simian sarcoma viral (v-sis) oncogene homolog) (PDGFB), transcript variant 1		PDGFB		129.5	1476.5	2648.5	0.01638	0.28208	0.114	0.09442	0.86705	1.01279
	BC009650.1	PDS5, regulator of cohesion maintenance, homolog A (S. cerevisiae) (SCC-112)	IOH11334	PDS5A		88.5	1537	6174	0.05593	0.06257	0.01649	0.00993	0.92338	3.0021
	BC002606.1	PDZ domain-containing protein 4	IOH4132	PDZD4		83.5	831	3177.5	0.04234	0.05276	0.10125	-0.00037	0.26599	1.31129
	NM_014303.2	pescadillo homolog 1, containing BRCT domain (zebrafish) (PES1)	IOH21738	PES1		310.5	1947	10692	0.00228	0.13002	0.05053	0.46737	1.30515	5.55143
	NM_002857.1	peroxisomal biogenesis factor 19 (PEX19)	IOH3467	PEX19		230.5	2480	68	0.11351	0.03136	0.06239	0.30253	1.80145	-0.44328
	BC017212.2	PHD finger protein 11 (PHF11)	IOH13041	PHF11		43.5	771.5	3200	0.04877	0.00458	0.03049	-0.08279	0.2106	1.32399
	BC002509.1	PHD finger protein 23	IOH3968	PHF23		63	353.5	3290.5	0.0449	1.49423	0.02127	-0.04261	-0.17862	1.37505
	NM_016483.3	PHD finger protein 7 (PHF7), transcript variant 1	IOH22255	PHF7		284	2417.5	7466	0.33363	0.02603	0.01781	0.41276	1.74324	3.73113
	NM_012396.1	pleckstrin homology-like domain, family A, member 3 (PHLDA3)	IOH12626	PHLDA3		450.5	2922	7313	0.00157	0.01694	0.01914	0.75585	2.21301	3.6448
	BC030815.1	phosphoinositide-3-kinase, regulatory subunit 1 (p85 alpha) (PIK3R1)	IOH23044	PIK3R1		68.5	1858	1770.5	0.05161	0.05252	0.20968	-0.03127	1.22228	0.51737
	PV3503	pim-1 oncogene (PIM1)		PIM1	protein kinase	2	6736.5	6711	0	0.00913	0.09483	-0.1683	5.76483	3.30511
	BC005004.1	family with sequence similarity 64, member A (FAM64A)	IOH4814	PIMREG		139	2020	5568.5	0.10174	0.13792	0.00495	0.114	1.37312	2.66044
	NM_006223.1	protein (peptidylprolyl cis/trans isomerase) NIMA-interacting, 4 (parvulin) (PIN4)	IOH7192	PIN4		54	767.5	4783.5	0.20951	0.2681	0.08411	-0.06116	0.20687	2.2175
	BC007565.1	phospholipase C, gamma 2 (phosphatidylinositol-specific) (PLCG2)	IOH6820	PLCG2		72	4407	6636	0.17678	0.0154	0.05328	-0.02407	3.59575	3.26279
	NM_005030.2	polo-like kinase 1 (Drosophila) (PLK1)	IOH5070	PLK1	protein kinase	622.5	4188	9075	0.26921	0.01756	0.01465	1.11026	3.39183	4.63902
	NM_007198.1	proline synthetase co-transcribed homolog (bacterial) (PROSC)	IOH12511	PLPBP		15.5	1340.5	5387	0.2281	0.06488	0.21422	-0.14048	0.74042	2.55802
	NM_002677.1	peripheral myelin protein 2 (PMP2)	IOH27101	PMP2		170	1753.5	7960	0	0.12703	0.06805	0.17787	1.12498	4.00987
	BC002519.2	Bifunctional polynucleotide phosphatase/kinase	IOH62827	PNKP		381	2191	8346.5	0.07053	0.01097	0.01567	0.61264	1.53234	4.22795
	NM_007254.2	polynucleotide kinase 3'-phosphatase (PNKP)	IOH21884	PNKP		1264	2979.5	11137.5	0.11188	0.02255	0.00133	2.43208	2.26655	5.80282
	BC032508.1	PNMA-like 1, mRNA (cDNA clone MGC:45422 IMAGE:5246377), complete cds	IOH62199	PNMA8A		207	1546	8531.5	0.11614	0.02104	0.01318	0.25411	0.93176	4.33235
	NM_006591.1	polymerase (DNA-directed), delta 3, accessory subunit (POLD3)	IOH41599	POLD3		82.5	748	3405	0.43712	0.15882	0.13332	-0.00243	0.18871	1.43966
	BC032662.1	polymerase (DNA directed) iota (POLI)	IOH21986	POLI		413.5	2150	3790	0.02907	0.19207	0.08732	0.67961	1.49417	1.6569
	BC003548.1	polymerase (DNA directed), lambda (POLL)	IOH4864	POLL		149	930.5	3461.5	0.07593	0.12387	0.07987	0.13459	0.35864	1.47154
	NM_015532.2	glutamate receptor, ionotropic, N-methyl D-aspartate-like 1A (GRINL1A), transcript variant 1	IOH12446	POLR2M		75	2859.5	192.5	0.65997	0.02695	0.61344	-0.01788	2.15481	-0.37304
	NM_144714.1	PP2C-like domain-containing protein C3orf48	IOH11221	PP2D1		69.5	687	3620.5	0.19331	0.17703	0.04433	-0.02921	0.13192	1.56126
	BC000535.1	Suppressor of SWI4 1 homolog	IOH4145	PPAN		39	934.5	4671	0	0.00378	0.05662	-0.09206	0.36237	2.15402
	NM_005037.3	peroxisome proliferator-activated receptor gamma (PPARG), transcript variant 4	IOH39661	PPARG		130	2130.5	277	0.06527	0.00166	0.05616	0.09545	1.47601	-0.32536
	NM_003621.1	PTPRF interacting protein, binding protein 2 (liprin beta 2) (PPFIBP2)	IOH10784	PPFIBP2		271.5	1984.5	3077.5	0.03907	0.03884	0.02596	0.38702	1.34007	1.25486
	NM_203457.1	peptidylprolyl isomerase E (cyclophilin E) (PPIE), transcript variant 3	IOH45842	PPIE		85	1603.5	4510	0.16638	0.03307	0.01254	0.00273	0.9853	2.06317
	NM_002714.2	protein phosphatase 1, regulatory (inhibitor) subunit 10 (PPP1R10)	IOH39632	PPP1R10		399	2393	4111	0.00709	0.07683	0.04025	0.64973	1.72044	1.83803
	NM_033256.1	protein phosphatase 1, regulatory (inhibitor) subunit 14A (PPP1R14A)	IOH13214	PPP1R14A		94.5	1467.5	6051.5	0.05238	0.04867	0.04919	0.0223	0.85867	2.93298
	NM_006658.1	chromosome 7 open reading frame 16 (C7orf16)	IOH21548	PPP1R17		-42.5	657	4226	-0.28284	0.18942	0.10006	-0.25999	0.10398	1.90291
	NM_014110.3	protein phosphatase 1, regulatory (inhibitor) subunit 8 (PPP1R8), transcript variant 1	IOH39485	PPP1R8		159.5	3750.5	535.5	0.0665	0.00396	0.03037	0.15624	2.98446	-0.17949
	NM_199326.1	protein phosphatase 2 (formerly 2A), regulatory subunit B'', beta (PPP2R3B), transcript variant 2	IOH3323	PPP2R3B		123	2615.5	751.5	0.09198	0.07218	0.00094	0.08103	1.92761	-0.05761
	NM_005710.1	polyglutamine binding protein 1 (PQBP1), transcript variant 1	IOH13398	PQBP1		76.5	2055	2623.5	0.13865	0.13351	0.07789	-0.01479	1.40571	0.99869
	BC030950.1	Small nuclear protein PRAC	IOH23190	PRAC1		143.5	3494.5	91.5	0.03449	0.09328	0.51777	0.12327	2.74608	-0.43002
	BC000452.1	peroxiredoxin 2 (PRDX2)	IOH3518	PRDX2		152	2119	92.5	0.15817	0	0.12995	0.14078	1.4653	-0.42946
	NM_002740.1	protein kinase C, iota (PRKCI)		PRKCI	protein kinase	69	665.5	3071.5	0.0205	0.15832	0.14527	-0.03025	0.11189	1.25148
	NM_003690.3	Interferon-inducible double stranded RNA-dependent protein kinase activator A	IOH57108	PRKRA		221	1950.5	6184.5	0.08319	0.01124	0.19243	0.28296	1.30841	3.00802
	NM_032284.2	PRP38 pre-mRNA processing factor 38 (yeast) domain containing A (PRPF38A), transcript variant 1	IOH46080	PRPF38A		164	1424	4867	0.12935	0.00099	0.03254	0.16551	0.81816	2.26461
	NM_004697.3	PRP4 pre-mRNA processing factor 4 homolog (yeast) (PRPF4)	IOH12861	PRPF4		106	1778.5	235.5	0.14676	0.07753	0.20718	0.046	1.14825	-0.34877
	BC038838.1	Proline-rich protein 16	IOH28760	PRR16		102	2207	592	0.15251	0.132	0.00239	0.03775	1.54725	-0.14761
	NM_178553.2	Uncharacterized protein C2orf53	IOH25885	PRR30		712.5	2439.5	11662	0.09428	0.09015	0.00643	1.2957	1.76373	6.09877
	NM_206909.1	pleckstrin and Sec7 domain containing 3 (PSD3), transcript variant 2	IOH43255	PSD3		129.5	2302.5	6080	0.32216	0.19563	0.45311	0.09441	1.63617	2.94906
	NM_153822.1	proteasome (prosome, macropain) 26S subunit, non-ATPase, 4 (PSMD4), transcript variant 2	IOH41107	PSMD4		660.5	2618	7199	0.16808	0.07617	0.11649	1.18856	1.92994	3.58047
	NM_024946.1	NEFA-interacting nuclear protein NIP30 (NIP30)	IOH10395	PSME3IP1		43	2231.5	203	0.09867	0.07954	0.2717	-0.08382	1.57006	-0.36711
	NM_018282.1	Paraspeckle component 1	IOH12080	PSPC1		61.5	683.5	3623	0.05749	0.00931	0.09407	-0.0457	0.12865	1.56267
	NM_032636.2	proline/serine-rich coiled-coil 1 (PSRC1), transcript variant 1	IOH4088	PSRC1		524	1728	8605.5	0.16463	0.30609	0.07896	0.90729	1.10122	4.37411
	BC016582.1	polypyrimidine tract binding protein 2 (PTBP2)	IOH9793	PTBP2		29	294	2644.5	0.34136	0.00481	0.22969	-0.11267	-0.23402	1.01054
	NM_198965.1	Parathyroid hormone-related protein	IOH44500	PTHLH		64	770	2810.5	0.06629	0.2057	0.039	-0.04055	0.20919	1.1042
	NM_007079.2	Protein tyrosine phosphatase type IVA 3	IOH4497	PTP4A3		1.5	1079.5	2809	16.4992	0.09105	0.00806	-0.16933	0.49739	1.10336
	NM_080548.1	Tyrosine-protein phosphatase non-receptor type 6	IOH4085	PTPN6		196	2708.5	9071.5	0.74318	0.37725	0.01691	0.23145	2.01421	4.63705
	NM_001015509.1	Peptidyl-tRNA hydrolase 2, mitochondrial	IOH54713	PTRH2		97	1384	6105.5	0.17495	0.01124	0.10898	0.02745	0.78092	2.96345
	NM_016077.1	peptidyl-tRNA hydrolase 2 (PTRH2), nuclear gene encoding mitochondrial protein	IOH3153	PTRH2		132	2185.5	11089.5	0.04285	0.02103	0.01779	0.09957	1.52722	5.77573
	NM_006607.1	pituitary tumor-transforming 2 (PTTG2)	IOH40244	PTTG2		212	1649.5	3321	0.09339	0.03644	0.1039	0.26441	1.02814	1.39226
	BC033621.2	Pseudouridylate synthase 7 homolog-like protein	IOH21688	PUS7L		225.5	2231	4749.5	0.09721	0.01902	0.0865	0.29223	1.56959	2.19831
	NM_032345.1	within bgcn homolog (Drosophila) (WIBG)	IOH6625	PYM1		269.5	2624.5	8635.5	0.18629	0.26754	0.00532	0.38289	1.93599	4.39103
	NM_024854.2	pyridine nucleotide-disulphide oxidoreductase domain 1 (PYROXD1)	IOH12803	PYROXD1		195	3178	1139.5	0.10879	0.0534	0.018	0.22938	2.45138	0.16132
	BC016330.1	RAD51 associated protein 1 (RAD51AP1)	IOH14709	RAD51AP1		117	3114.5	6958	0.14505	0.04019	0.00203	0.06866	2.39225	3.44448
	NM_006479.2	RAD51 associated protein 1 (RAD51AP1)	IOH7384	RAD51AP1		118.5	1628	3350	0.10144	0.11553	0.02195	0.07175	1.00811	1.40863
	BC052988.1	retinoic acid induced 14 (RAI14)	IOH28908	RAI14		119	1111.5	3731	0.13073	0.53248	0.09893	0.07278	0.52718	1.62361
	NM_006105.3	Rap guanine nucleotide exchange factor 3	IOH11287	RAPGEF3		137.5	1838	3705	0.11828	0.09464	0.1378	0.11091	1.20365	1.60894
	NM_022650.1	RAS p21 protein activator (GTPase activating protein) 1 (RASA1), transcript variant 2	IOH41794	RASA1		108	2236	8089	0.07857	0.00316	0.03304	0.05012	1.57424	4.08267
	NM_007368.2	RAS p21 protein activator 3 (RASA3)	IOH25931	RASA3		188.5	2355.5	8296.5	0.02626	0.09336	0.0052	0.21599	1.68552	4.19975
	NM_153819.1	RAS guanyl releasing protein 2 (calcium and DAG-regulated) (RASGRP2), transcript variant 2, mRNA.	IOH52442	RASGRP2		311	3123.5	1404	0.1728	0.03464	0.02317	0.4684	2.40063	0.31057
	NM_170603.1	RAS guanyl-releasing protein 4	IOH39528	RASGRP4		198	2490	6565.5	0.07142	0.00568	0.03349	0.23557	1.81075	3.22301
	BC032347.1	chromosome 8 open reading frame 59 (C8orf59)	IOH21704	RBIS		249	2745.5	7008	0.2215	0.24287	0.05126	0.34065	2.04866	3.47269
	BC103660.1	Putative RNA-binding protein 15	IOH63319	RBM15		46	1065.5	3318	0.4919	0.00066	0.03154	-0.07764	0.48435	1.39057
	NM_032905.3	Splicing factor 45	IOH56977	RBM17		41.5	1770	3791.5	0.01704	0.04394	0.75849	-0.08691	1.14034	1.65775
	BC024208.1	RNA binding motif protein 23 (RBM23)	IOH12635	RBM23		571.5	7106.5	953	0.00124	0.00587	0.16769	1.00517	6.10935	0.05609
	NM_018107.2	RNA binding motif protein 23 (RBM23), transcript variant 2	IOH4028	RBM23		271	3863.5	313.5	0.0835	0.19895	0.05639	0.38598	3.08967	-0.30476
	BC011923.1	RNA binding motif protein 33 (RBM33)	IOH13453	RBM33		122	2598.5	810.5	0.30139	0.01769	0.01658	0.07896	1.91178	-0.02432
	BC006986.1	RNA binding motif protein 41 (RBM41)	IOH7170	RBM41		209	1250	3107.5	0.1015	0.05883	0.16861	0.25823	0.65614	1.27179
	BC031682.1	RNA-binding protein 42	IOH22859	RBM42		141	2167	3702	0.1003	0.01436	0.01681	0.11812	1.51	1.60724
	NM_005105.2	RNA binding motif protein 8A (RBM8A)	IOH10383	RBM8A		250.5	769	5294	0.03105	0.00552	0.039	0.34374	0.20827	2.50555
	BC030290.1	RNA-binding motif, single-stranded-interacting protein 3	IOH21571	RBMS3		112	1320.5	4218	0.10102	0.13012	0.00905	0.05836	0.72179	1.8984
	NM_203283.1	Recombining binding protein suppressor of hairless (Drosophila) (RBPSUH), transcript variant 3, mRNA	IOH44496	RBPJ		44.5	1792	4701	0.11123	0.07655	0.01955	-0.08073	1.16082	2.17094
	NM_203284.1	recombination signal binding protein for immunoglobulin kappa J region (RBPJ), transcript variant 4	IOH39978	RBPJ		250	2805.5	9937.5	0.09051	0.03151	0.06155	0.34271	2.10453	5.1257
	NM_203418.1	regulator of calcineurin 1 (RCAN1), transcript variant 3	IOH41499	RCAN1		35	1646.5	180.5	0.08081	0.0554	0.2233	-0.1003	1.02534	-0.37981
	NM_016606.2	receptor accessory protein 2 (REEP2)	IOH40596	REEP2		37.5	483	2773.5	0.01886	0.07027	0.00994	-0.09515	-0.05804	1.08332
	NM_001001330.1	receptor accessory protein 3 (REEP3)	IOH40137	REEP3		225.5	1873.5	3245	0.01568	0.27363	0.13641	0.29223	1.23671	1.34938
	NM_000449.2	regulatory factor X, 5 (influences HLA class II expression) (RFX5), transcript variant 1	IOH10040	RFX5		172	2375	13250.5	0.04933	0.03692	0.12642	0.18199	1.70367	6.9951
	BC019039.2	Regulator of G-protein signaling 3	IOH46089	RGS3		617	3380.5	6447	0.07335	0.0115	0.26433	1.09892	2.63993	3.15615
	NM_134427.1	regulator of G-protein signaling 3 (RGS3), transcript variant 4	IOH45474	RGS3		661.5	2998	7634	0.00962	0.02877	0.201	1.19062	2.28377	3.82592
	NM_033345.1	regulator of G-protein signaling 8 (RGS8), transcript variant 1	IOH40371	RGS8		486.5	4125	7354	0.04796	0.24067	0.03096	0.83003	3.33317	3.66793
	BC006104.1	RIO kinase 1 (yeast) (RIOK1)	IOH6588	RIOK1	protein kinase	50	617	2894	0.05657	0.08939	0.26388	-0.06939	0.06674	1.15132
	NM_006912.3	Ras-like without CAAX 1 (RIT1)	IOH29584	RIT1		537	2758.5	8452.5	0.07374	0.02743	0.09863	0.93409	2.06077	4.28777
	BC018060.1	Ras-like without CAAX 2 (RIT2)	IOH11303	RIT2		441	2901	7102	0.37199	0.13211	0.02071	0.73627	2.19345	3.52574
	NM_032848.1	chromosome 12 open reading frame 52 (C12orf52)	IOH13466	RITA1		748	2989.5	7428	0.121	0.0466	0.06987	1.36885	2.27586	3.70969
	NM_005168.3	Rho-related GTP-binding protein RhoE	IOH55962	RND3		16.5	550.5	4359	0.12856	0.21708	0.02952	-0.13842	0.00481	1.97797
	NM_014372.1	ring finger protein 11 (RNF11)	IOH11235	RNF11		181	2439.5	208.5	0.14064	0.01884	0.078	0.20053	1.76373	-0.36401
	BC028120.1	ring finger protein 32 (RNF32)	IOH11613	RNF32		61	1150	3383	0.06955	0.04427	0.08361	-0.04673	0.56303	1.42725
	NM_194358.1	ring finger protein 41 (RNF41), transcript variant 2	IOH45538	RNF41		56	9757.5	870	0.02525	0.03645	0.12679	-0.05703	8.5778	0.00925
	BC019954.1	RNA guanylyltransferase and 5'-phosphatase (RNGTT)	IOH21472	RNGTT		81.5	723	2704.5	0.37307	0.4362	0.06406	-0.00449	0.16544	1.0444
	BC010697.1	RNA-binding protein 40	IOH9799	RNPC3		162.5	1832.5	7284.5	0.07397	0.0436	0.10629	0.16242	1.19853	3.62872
	BC051849.2	RPA interacting protein (RPAIN)	IOH28888	RPAIN		214	4142	483.5	0.49564	0.01605	0.00439	0.26853	3.34899	-0.20883
	NM_032308.1	RPA interacting protein (RPAIN), transcript variant 2	IOH5031	RPAIN		323.5	5739.5	187	0.05465	0.00308	0.23444	0.49416	4.83649	-0.37614
	BC056415.1	RNA polymerase II-associated protein 3	IOH29068	RPAP3		148	2076.5	7528	0.26755	0.11271	0.04264	0.13254	1.42573	3.76611
	NM_000975.2	ribosomal protein L11 (RPL11)	IOH1740	RPL11		49	591.5	3347.5	0.17317	0.09205	0.03274	-0.07146	0.04299	1.40721
	BC009294.1	ribosomal protein L14 (RPL14)	IOH14145	RPL14		40.5	978	3037	0.05238	0.03615	0.00559	-0.08897	0.40287	1.23201
	NM_000983.3	60S ribosomal protein L22	IOH58958	RPL22		136	1589	4400.5	0.13518	0.00979	0.40702	0.10781	0.9718	2.00138
	NM_000984.2	ribosomal protein L23a (RPL23A)	IOH13591	RPL23A		699	2641	6614	0.01214	0.04926	0.05068	1.26789	1.95136	3.25038
	NM_000987.2	ribosomal protein L26 (RPL26)	IOH45675	RPL26		516.5	2877.5	7949	0.01506	0.02777	0.02722	0.89184	2.17157	4.00366
	NM_016093.2	ribosomal protein L26-like 1 (RPL26L1)	IOH14674	RPL26L1		161.5	1566.5	3093	0.04816	0.08531	0.02789	0.16036	0.95085	1.26361
	BC071909.1	Ribosomal protein L29, mRNA (cDNA clone MGC:88589 IMAGE:6729601), complete cds	IOH63092	RPL29		78	1000	4438	0.10879	0.2885	0	-0.0117	0.42336	2.02254
	NM_000992.2	60S ribosomal protein L29	IOH1702	RPL29		217	2041.5	7999.5	0.06517	0.00104	0.03138	0.27472	1.39314	4.03216
	NM_000989.2	ribosomal protein L30 (RPL30)	IOH3809	RPL30		137.5	1585.5	4263	0.11828	0.06199	0.01957	0.11091	0.96854	1.9238
	NM_000993.2	ribosomal protein L31 (RPL31), transcript variant 1	IOH14051	RPL31		100.5	1100.5	3907	0.10554	0.29107	0.04778	0.03467	0.51694	1.72292
	NM_015414.2	ribosomal protein L36 (RPL36), transcript variant 2	IOH4985	RPL36		115	1243	6128	0.09838	0.26851	0.04062	0.06454	0.64963	2.97614
	NM_000999.2	ribosomal protein L38 (RPL38), transcript variant 1	IOH4263	RPL38		139	916.5	3060.5	0.01017	0.10416	0.0811	0.11399	0.34561	1.24527
	NM_052969.1	ribosomal protein L39-like (RPL39L)	IOH12514	RPL39L		75.5	1172	3542	0.10302	0.14359	0.28707	-0.01685	0.58352	1.51696
	NM_001014.2	ribosomal protein S10 (RPS10)	IOH4063	RPS10		586	3029.5	5611	0.02896	0.07913	0.08091	1.03505	2.31311	2.68442
	BC001697.1	ribosomal protein S15a (RPS15A)	IOH3864	RPS15A		103	991	2689	0.17849	0.1056	0.11676	0.03982	0.41497	1.03565
	NM_001022.3	ribosomal protein S19 (RPS19)	IOH4572	RPS19		892	3290	9302	0.04756	0.01333	0.00608	1.66557	2.55567	4.76711
	NM_015920.3	40S ribosomal protein S27-like protein	IOH57353	RPS27L		259	1724.5	4341.5	0.12013	0.02009	0.04121	0.36125	1.09797	1.96809
	NM_001031.4	40S ribosomal protein S28	IOH58930	RPS28		108.5	1067.5	4274.5	0.12383	0.04835	0.05112	0.05115	0.48621	1.93029
	BC096303.1	Ribosomal protein S6 kinase alpha-3	IOH63248	RPS6KA3	protein kinase	51	3005.5	1077	0.2773	0.02847	0.10242	-0.06734	2.29075	0.12606
	NM_003161.1	ribosomal protein S6 kinase, 70kDa, polypeptide 1 (RPS6KB1)	IOH29907	RPS6KB1	protein kinase	97.5	1497	2626	0.1378	0.0359	0.03931	0.02849	0.88614	1.0001
	BC006106.1	ribosomal protein S6 kinase, 70kDa, polypeptide 2 (RPS6KB2)	IOH6536	RPS6KB2	protein kinase	305	3294	6179	0.02318	0.06483	0.0341	0.45604	2.55939	3.00493
	NM_152260.1	RNA pseudouridylate synthase domain containing 2 (RPUSD2)	IOH40870	RPUSD2		324.5	1178	3674	0.02397	0.03842	0.02617	0.49622	0.5891	1.59145
	BC019069.1	ribosomal L1 domain containing 1 (RSL1D1)	IOH14121	RSL1D1		34.5	1344.5	5367	0.14347	0.10571	0.04163	-0.10133	0.74414	2.54674
	BC028672.1	chromosome 15 open reading frame 15 (C15orf15)	IOH14574	RSL24D1		258	2350.5	5632.5	0.21926	0.0346	0.13144	0.3592	1.68086	2.69655
	BC067773.1	arginine/serine-rich coiled-coil 2 (RSRC2)	IOH40125	RSRC2		105	1596.5	6677	0.12122	0.05891	0.04045	0.04394	0.97878	3.28592
	NM_012425.2	Ras suppressor protein 1 (RSU1), transcript variant 1	IOH3398	RSU1		165.5	1999.5	965.5	0.01282	0.07533	0.42258	0.1686	1.35404	0.06314
	NM_198483.1	RUN and FYVE domain-containing protein 4	IOH42754	RUFY4		286.5	2128	4390	0.02221	0.03323	0.04574	0.41792	1.47369	1.99546
	NM_016940.1	RWD domain containing 2B (RWDD2B)	IOH12821	RWDD2B		372.5	2874.5	8439.5	0.17274	0.07306	0.05287	0.59513	2.16878	4.28043
	BC014959.1	RING1 and YY1 binding protein (RYBP)	IOH13467	RYBP		106	1719	3411	0.05337	0.09461	0.02197	0.04599	1.09285	1.44305
	NM_005979.1	S100 calcium binding protein A13 (S100A13), transcript variant 2	IOH1589	S100A13		45.5	1637.5	7116	0.01554	0.01339	0.02464	-0.07867	1.01696	3.53364
	NM_005870.3	Histone deacetylase complex subunit SAP18	IOH53845	SAP18		608.5	3249	7396.5	0.02905	0.01132	0.00048	1.0814	2.51749	3.69191
	BC093051.1	Nuclear protein Hcc-1	IOH63174	SARNP		126	27913.5	4131.5	0.03367	0.15278	0.09841	0.08721	25.4835	1.8496
	BC020726.1	sciellin (SCEL)	IOH12969	SCEL		239.5	2819.5	3730	0.25096	0.02132	0.04133	0.32108	2.11756	1.62304
	BC047536.1	sciellin (SCEL)	IOH27737	SCEL		957.5	9874	9455.5	0.12185	0.01833	0.0086	1.80053	8.68628	4.85372
	NM_017988.4	SCY1-like 2 (S. cerevisiae) (SCYL2)	IOH61176	SCYL2	protein kinase	135.5	2009	11163.5	0.77756	0.06195	0.16766	0.10678	1.36288	5.81748
	NM_170746.2	Selenoprotein H	IOH58679	SELENOH		42.5	671	6942	0.04991	0.01475	0.0273	-0.08485	0.11702	3.43545
	BC005840.2	selenoprotein S (SELS)	IOH46093	SELENOS		197.5	1569	3966	0.11099	0.0009	0.13515	0.23453	0.95318	1.75621
	BC021174.1	Small EDRK-rich factor 1	IOH10706	SERF1A		250.5	2769	14043.5	0.07057	0.0189	0.02412	0.34374	2.07054	7.44256
	NM_014445.2	stress-associated endoplasmic reticulum protein 1 (SERP1)	IOH41298	SERP1		127	820.5	3827.5	0.06681	0.05085	0.12581	0.08926	0.25622	1.67806
	NM_006216.2	serpin peptidase inhibitor, clade E (nexin, plasminogen activator inhibitor type 1), member 2 (SERPINE2)	IOH12816	SERPINE2		160	942	2891.5	0.17678	0.17715	0.10442	0.15726	0.36935	1.14991
	BC000522.1	serpin peptidase inhibitor, clade F (alpha-2 antiplasmin, pigment epithelium derived factor), member 1 (SERPINF1)	IOH3622	SERPINF1		95.5	1562	6014.5	0.05183	0.13943	0.00506	0.02436	0.94666	2.9121
	BC002670.2	SERTA domain containing 1 (SERTAD1)	IOH5294	SERTAD1		207	3850.5	357	0.19813	0.06629	0.06734	0.2541	3.07757	-0.28021
	NM_199123.1	SET domain containing 3 (SETD3), transcript variant 2	IOH42083	SETD3		152	1700.5	4024	0.04652	0.03451	0.07451	0.14078	1.07562	1.78893
	NM_201998.1	Splicing factor 1	IOH56887	SF1		1075	5624.5	11603.5	0.0171	0.07958	0.01286	2.04265	4.7294	6.06576
	BC007610.1	splicing factor 3b, subunit 2, 145kDa (SF3B2)	IOH6911	SF3B2		163.5	1449.5	6928.5	0.16867	0.03268	0.01153	0.16448	0.84191	3.42784
	NM_138414.1	coiled-coil domain containing 101 (CCDC101)	IOH10524	SGF29		193	2258	10522	0.27112	0.09207	0.15739	0.22526	1.59473	5.45551
	NM_030645.1	SH3-binding domain protein 5-like (SH3BP5L)	IOH14805	SH3BP5L		93	891.5	2818	0.06083	0.13563	0.15005	0.01921	0.32233	1.10844
	BC085613.1	SH3 domain protein D19, mRNA (cDNA clone MGC:105136 IMAGE:30707975), complete cds.	IOH62733	SH3D19		97	2401.5	442.5	0.01458	0.06448	0.9508	0.02745	1.72835	-0.23197
	NM_020145.1	Endophilin-B2	IOH14380	SH3GLB2		71	2651	-16.5	0.19919	0.23793	-3.0427	-0.02612	1.96067	-0.49096
	NM_007373.2	soc-2 suppressor of clear homolog (C. elegans) (SHOC2)	IOH26711	SHOC2		27	896	4209	0.31427	0.05524	0.06888	-0.11679	0.32652	1.89332
	NM_145061.1	chromosome 13 open reading frame 3 (C13orf3)	IOH12828	SKA3		115.5	3096	226	0.03061	0.03517	0.00626	0.06557	2.37502	-0.35413
	NM_032214.1	Src-like-adaptor 2 (SLA2), transcript variant 1	IOH26309	SLA2		94	1976	1160	0.01504	0.21757	0.19019	0.02127	1.33215	0.17289
	BC098302.1	Kanadaptin	IOH63362	SLC4A1AP		51.5	1255.5	7227	0.20595	0.25401	0.06829	-0.06631	0.66126	3.59627
	NM_152391.2	PQ loop repeat containing 3 (PQLC3)	IOH11899	SLC66A3		27	427.5	3371	0	0.05789	0.12586	-0.11679	-0.10972	1.42047
	BC021189.2	cDNA clone IMAGE:4829245	IOH22437	SLIT1-AS1		199	1717	787.5	0.02843	0.12025	0.1715	0.23763	1.09099	-0.03729
	BC036123.1	stromal membrane-associated protein 1 (SMAP1)	IOH27289	SMAP1		93	1160	3116	0.27372	0.24871	0.14886	0.01921	0.57234	1.27658
	BC023144.1	SWI/SNF-related matrix-associated actin-dependent regulator of chromatin subfamily A member 5	IOH10881	SMARCA5		213.5	1508.5	5154.5	0.00994	0.07266	0.28465	0.2675	0.89685	2.42684
	NM_006306.2	structural maintenance of chromosomes 1A (SMC1A)	IOH44953	SMC1A		89	1201.5	4673	0.03178	0.0665	0.06022	0.01096	0.61098	2.15514
	NM_019025.2	Spermine oxidase	IOH41563	SMOX		104.5	1471	2888	0.04737	0.0298	0.07198	0.0429	0.86193	1.14793
	NM_198501.1	Smoothelin-like protein 2	IOH43320	SMTNL2		735.5	9702	6694.5	0.30476	0.02361	0.01426	1.34309	8.52612	3.2958
	BC031010.1	SET and MYND domain containing 3 (SMYD3)	IOH23142	SMYD3		162	1201	5446	0.00873	0.00353	0.02389	0.16138	0.61052	2.59132
	NM_003068.2	snail homolog 2 (Drosophila) (SNAI2)	IOH10082	SNAI2		279.5	1240	2695.5	0.04807	0.03193	0.11464	0.40349	0.64683	1.03932
	NM_180699.1	small nuclear ribonucleoprotein 35kDa (U11/U12) (SNRNP35), transcript variant 3, mRNA.	IOH44651	SNRNP35		108	1933.5	3772.5	0.01309	0.05303	0.08753	0.05012	1.29258	1.64703
	BC001494.1	WD repeat domain 57 (U5 snRNP specific) (WDR57)	IOH14556	SNRNP40		15	375	2832.5	0.18856	0.04148	0.03919	-0.14151	-0.1586	1.11661
	NM_003089.4	small nuclear ribonucleoprotein 70kDa polypeptide (RNP antigen) (SNRP70)	IOH40192	SNRNP70		383.5	1606	6403.5	0.17885	0.18668	0.00563	0.61779	0.98763	3.1316
	NM_004596.1	small nuclear ribonucleoprotein polypeptide A (SNRPA)	IOH6628	SNRPA		155.5	2100.5	9257.5	0.03183	0.12557	0.05141	0.14799	1.44808	4.742
	BC022816.1	Small nuclear ribonucleoprotein polypeptide A', mRNA (cDNA clone MGC:39248 IMAGE:4904205), complete cds	IOH14672	SNRPA1		196	1955	6175	0.15152	0.30888	0.02199	0.23144	1.3126	3.00267
	NM_003092.3	small nuclear ribonucleoprotein polypeptide B'' (SNRPB2), transcript variant 1	IOH21977	SNRPB2		77.5	2213	6233.5	0.1916	0.18149	0.00079	-0.01273	1.55283	3.03568
	NM_005678.3	SNRPN upstream reading frame (SNURF), transcript variant 1	IOH45840	SNURF		222	1442.5	5213	0.344	0.23971	0.36868	0.28502	0.83539	2.45985
	NP_079513.1	SOST / Sclerostin Protein		SOST		44.5	1232	5107.5	0.36547	0.35929	0.04749	-0.08072	0.63939	2.40032
	BC009614.1	sperm associated antigen 16 (SPAG16)	IOH9949	SPAG16		197	2806.5	80.5	0.02871	0.03049	0.43041	0.2335	2.10546	-0.43623
	NM_001009613.1	Sperm protein associated with the nucleus on the X chromosome N4	IOH58584	SPANXN4		491	2732	9150	0.01152	0.03002	0.06028	0.83929	2.03609	4.68135
	BC008656.1	Spermatogenesis-associated protein 7	IOH3347	SPATA7		299	3961	68	0.03311	0.05962	0.10399	0.44368	3.18046	-0.44329
	BC048299.1	spermatogenesis associated, serine-rich 2 (SPATS2)	IOH26615	SPATS2		593	2912	12199	0.1574	0.00583	0.05773	1.04947	2.20369	6.40178
	BC018736.1	viral DNA polymerase-transactivated protein 6 (LOC26010)	IOH14106	SPATS2L		119.5	2030	4413	0.05325	0.00975	0.09614	0.07381	1.38244	2.00844
	NM_012391.1	SAM pointed domain containing ets transcription factor (SPDEF)	IOH12673	SPDEF		70	1646.5	300	0.06061	0.01847	0.033	-0.02818	1.02534	-0.31237
	BC000044.1	Spindlin-2B	IOH4604	SPIN2B		729.5	3484	6055.5	0.16963	0.01948	0.13487	1.33074	2.7363	2.93524
	BC033677.1	Uncharacterized protein C9orf114	IOH40219	SPOUT1		475	2205	7000	0.40789	0.04169	0.06465	0.80633	1.54538	3.46818
	NM_173080.1	small proline-rich protein 4 (SPRR4)	IOH34934	SPRR4		176	1286.5	5664	0.22499	0.04562	0.18402	0.19023	0.69013	2.71433
	NM_032641.1	splA/ryanodine receptor domain and SOCS box containing 2 (SPSB2)	IOH4981	SPSB2		107.5	1126.5	4138	0.08551	0.12115	0.02016	0.04909	0.54114	1.85326
	NM_139168.1	splicing factor, arginine/serine-rich 12 (SFRS12), transcript variant 2	IOH37855	SREK1		110	1304.5	6473.5	0.06428	0.05475	0.14888	0.05423	0.70689	3.1711
	BC010947.1	signal recognition particle 19kDa (SRP19)	IOH14455	SRP19		39	508	3156	0.10879	0.15868	0.06408	-0.09206	-0.03477	1.29916
	PV4215	SFRS protein kinase 1 (SRPK1)		SRPK1	protein kinase	98.5	1096	4975	0.00718	0.05936	0.13503	0.03054	0.51275	2.32555
	NM_182691.1	SFRS protein kinase 2 (SRPK2), transcript variant 2	IOH26788	SRPK2	protein kinase	188.5	1278	5104	0.05627	0.01992	0.13023	0.21599	0.68222	2.39834
	NM_182692.1	Serine/threonine-protein kinase SRPK2	IOH38187	SRPK2	protein kinase	147.5	1296	7260	0.12944	0.00982	0.02805	0.1315	0.69898	3.61489
	PV3829	SFRS protein kinase 2 (SRPK2), transcript variant 2		SRPK2	protein kinase	51	733	3360.5	0.19411	0.07717	0.19842	-0.06734	0.17475	1.41455
	NM_014370.2	SFRS protein kinase 3 (SRPK3)	IOH60262	SRPK3	protein kinase	105.5	1249.5	4170.5	0.02011	0.08432	0.01882	0.04496	0.65568	1.8716
	PV3880	SFRS protein kinase 3 (SRPK3)		SRPK3	protein kinase	32	988.5	5442	0.08839	0.01645	0.02703	-0.10649	0.41265	2.58906
	NM_006924.3	splicing factor, arginine/serine-rich 1 (splicing factor 2, alternate splicing factor) (SFRS1), transcript variant 1	IOH11039	SRSF1		858	3427.5	9331.5	0.13516	0.06045	0.02311	1.59551	2.6837	4.78376
	BC010074.2	FUS interacting protein (serine/arginine-rich) 1 (FUSIP1)	IOH13694	SRSF10		182	1554.5	4755.5	0.04662	0.00045	0.00372	0.2026	0.93968	2.2017
	NM_054016.1	FUS interacting protein (serine/arginine-rich) 1 (FUSIP1), transcript variant 2	IOH6575	SRSF10		148	1141.5	3572.5	0.31533	0.08363	0.09243	0.13254	0.55512	1.53417
	BC000914.1	splicing factor, arginine/serine-rich 3 (SFRS3)	IOH2971	SRSF3		38	683	4338.5	0.03722	0.00621	0.07285	-0.09412	0.12819	1.96639
	BC018823.2	splicing factor, arginine/serine-rich 5 (SFRS5)	IOH14860	SRSF5		204	2472.5	6418	0.14558	0.00086	0.03371	0.24793	1.79446	3.13978
	NM_006925.2	Splicing factor, arginine/serine-rich 5	IOH58606	SRSF5		152.5	1682.5	4797	0.04173	0.00378	0.00531	0.14181	1.05886	2.22511
	NM_006275.2	splicing factor, arginine/serine-rich 6 (SFRS6)	IOH3168	SRSF6		497.5	2446.5	6248	0.18619	0.26562	0.03214	0.85269	1.77025	3.04385
	BC057783.1	splicing factor, arginine/serine-rich 2B (SFRS2B)	IOH29271	SRSF8		80.5	1287.5	2709	0.07906	0.0324	0.16131	-0.00655	0.69106	1.04693
	NM_003769.2	splicing factor, arginine/serine-rich 9 (SFRS9)	IOH41184	SRSF9		355.5	2346.5	6155	0.15713	0.04008	0.0494	0.5601	1.67714	2.99138
	NM_014188.2	SSU72 RNA polymerase II CTD phosphatase homolog (S. cerevisiae) (SSU72)	IOH5813	SSU72		52.5	1847	291	0.30978	0.09571	0.1215	-0.06424	1.21203	-0.31746
	BC030586.2	signal transducing adaptor molecule (SH3 domain and ITAM motif) 1 (STAM)	IOH22241	STAM		306	3087.5	122.5	0.00462	0.00527	0.08658	0.4581	2.36711	-0.41253
	BC050432.1	staufen, RNA binding protein, homolog 1 (Drosophila) (STAU1)	IOH26694	STAU1		42	486.5	3545	0.03367	0.10901	0.02633	-0.08588	-0.05478	1.51865
	NM_004602.2	Double-stranded RNA-binding protein Staufen homolog 1	IOH62672	STAU1		237	886.5	5302	0.0179	0.01675	0.05281	0.31592	0.31768	2.51007
	NM_004226.1	Serine/threonine-protein kinase 17B		STK17B	protein kinase	125.5	2839.5	612	0.10705	0.00274	0.01386	0.08618	2.13619	-0.13633
	NM_032017.1	serine/threonine kinase 40 (STK40)	IOH40615	STK40	protein kinase	534	4400.5	4335.5	0.17744	0.04933	0.23731	0.92789	3.58969	1.9647
	NM_006873.2	stonin 1 (STON1)	IOH38227	STON1		58.5	2758	146.5	0.08461	0.03128	0.49715	-0.05188	2.0603	-0.39899
	BC051790.1	syntaxin 17 (STX17)	IOH26984	STX17		136.5	1215.5	3637.5	0.08806	0.02618	0.08456	0.10885	0.62402	1.57085
	BC015749.1	syntaxin binding protein 1 (STXBP1)	IOH13588	STXBP1		113	2247.5	1570.5	0.01252	0.05632	0.03377	0.06042	1.58495	0.40452
	NM_003165.1	Syntaxin-binding protein 1	IOH52429	STXBP1		121	2391.5	218.5	0.07013	0.00976	0.27508	0.07691	1.71903	-0.35836
	NM_006713.2	SUB1 homolog (S. cerevisiae) (SUB1)	IOH14686	SUB1		522.5	1777	5814.5	0.28284	0.02785	0.15165	0.9042	1.14685	2.79925
	BC093990.1	Sin3 histone deacetylase corepressor complex component SDS3	IOH62017	SUDS3		1315.5	3603	10768.5	0.08547	0.14641	0.00755	2.5382	2.84712	5.5946
	BC058861.1	sulfotransferase family, cytosolic, 1C, member 4 (SULT1C4)	IOH28672	SULT1C4		318.5	2602	258.5	0.07326	0.08533	0.17233	0.48386	1.91504	-0.3358
	BC021561.1	FACT complex subunit SPT16	IOH14131	SUPT16H		138.5	1007	5817	0.13785	0.0632	0.04814	0.11296	0.42988	2.80065
	NM_017503.2	surfeit 2 (SURF2)	IOH12519	SURF2		374.5	2661	10644.5	0.19448	0.02551	0.00777	0.59925	1.96998	5.52463
	BC029427.1	coiled-coil domain containing 23 (CCDC23)	IOH23192	SVBP		137.5	1692	4222.5	0.036	0.05851	0.14921	0.1109	1.06771	1.90094
	NM_194299.1	Synaptonemal complex protein 2-like	IOH35431	SYCP2L		40.5	1713.5	436.5	0.05238	0.01857	0.37421	-0.08897	1.08773	-0.23536
	NM_153694.3	synaptonemal complex protein 3 (SYCP3)	IOH40756	SYCP3		70	878.5	3999.5	0.16162	0.04266	0.07761	-0.02819	0.31022	1.77512
	NM_015484.1	SYF2 homolog, RNA splicing factor (S. cerevisiae) (SYF2), transcript variant 1	IOH9828	SYF2		92	1714.5	1185.5	0.09223	0.0499	0.07336	0.01715	1.08865	0.18728
	NM_005639.1	synaptotagmin I (SYT1)	IOH29114	SYT1		188.5	2057.5	8010	0.01876	0.01821	0.17656	0.21599	1.40803	4.03809
	NM_032298.1	Synaptotagmin III (SYT3), mRNA	IOH55503	SYT3		13	517.5	5417.5	0.10879	0.04509	0.04268	-0.14563	-0.02592	2.57524
	NM_205848.1	synaptotagmin VI (SYT6)	IOH43389	SYT6		79.5	1244.5	5812	0.11563	0.09261	0.18687	-0.00861	0.65102	2.79784
	NM_032943.2	synaptotagmin-like 2 (SYTL2), transcript variant a	IOH38478	SYTL2		240	1793.5	10287.5	0.0825	0.34892	0.13836	0.3221	1.16222	5.32319
	NM_133480.1	transcriptional adaptor 3 (NGG1 homolog, yeast)-like (TADA3L), transcript variant 2	IOH13139	TADA3		134.5	7245.5	477.5	0.24709	0.00322	0.10218	0.10472	6.23878	-0.21222
	BC018137.1	TATA box binding protein (TBP)-associated factor, RNA polymerase I, B, 63kDa (TAF1B)	IOH10369	TAF1B		405	1955	7786	0.00349	0.04196	0.03615	0.66209	1.3126	3.91169
	NM_134323.1	TAR (HIV-1) RNA binding protein 2 (TARBP2), transcript variant 1	IOH6090	TARBP2		151.5	1276	7574.5	0.13535	0.66277	0.12519	0.13975	0.68035	3.79235
	BC025266.1	taspase, threonine aspartase, 1 (TASP1)	IOH23199	TASP1		47.5	1537.5	7616.5	0.10421	0.13751	0.01606	-0.07455	0.92385	3.81605
	NM_017772.2	TBC1 domain family member 22B	IOH42187	TBC1D22B		750	6174	4671	0.01131	0.01512	0.15411	1.37298	5.24107	2.15401
	NM_178571.2	hypothetical protein MGC51025 (MGC51025)	IOH26524	TBC1D26		136.5	947.5	3550	0.11915	0.08135	0.00956	0.10884	0.37448	1.52148
	NM_004865.2	TBP-like 1 (TBPL1)	IOH10084	TBPL1		138.5	1142.5	4513.5	0.13785	0.02042	0.04653	0.11296	0.55605	2.06515
	NM_006756.2	transcription elongation factor A (SII), 1 (TCEA1), transcript variant 1	IOH42106	TCEA1		676.5	4318.5	6883	0.03658	0.0375	0.06226	1.22152	3.51333	3.40216
	NM_198723.1	transcription elongation factor A (SII), 2 (TCEA2), transcript variant 2	IOH45764	TCEA2		89	4320.5	4263	0.11123	0.08036	0.05839	0.01096	3.5152	1.9238
	NM_080390.3	transcription elongation factor A (SII)-like 2 (TCEAL2)	IOH41393	TCEAL2		118.5	1737.5	4769	0.30432	0.15668	0.03529	0.07175	1.11008	2.20931
	BC044632.1	Transcription factor 19 (SC1), mRNA (cDNA clone MGC:52412 IMAGE:4841638), complete cds	IOH62971	TCF19		247.5	3141	5610.5	0.20856	0.06844	0.15817	0.33756	2.41693	2.68413
	NM_014972.1	Transcription factor 25	IOH55892	TCF25		932.5	11724	11367	0.00379	0.06791	0.04964	1.74902	10.4089	5.93231
	NM_003215.1	tec protein tyrosine kinase (TEC)		TEC	protein kinase	100	1446.5	4924	0.01414	0.02298	0.0336	0.03363	0.83911	2.29677
	PV3269	tec protein tyrosine kinase (TEC)		TEC	protein kinase	122.5	2698	5787.5	0.10967	0.04351	0.02822	0.08	2.00444	2.78401
	NM_138779.1	chromosome 13 open reading frame 27 (C13orf27)	IOH10711	TEX30		385.5	1711	5983	0.02018	0.03141	0.12339	0.62191	1.0854	2.89433
	NM_003221.1	transcription factor AP-2 beta (activating enhancer binding protein 2 beta) (TFAP2B)	IOH25803	TFAP2B		51.5	774	2998	0.20595	0.04202	0.03255	-0.06631	0.21293	1.21001
	NM_172238.1	Transcription factor AP-2 delta (activating enhancer binding protein 2 delta) (TFAP2D), mRNA	IOH34861	TFAP2D		441	1611	3918	0.19241	0.04038	0.00938	0.73627	0.99229	1.72913
	NM_007162.1	transcription factor EB (TFEB)	IOH21660	TFEB		109	2702	254.5	0.02595	0.01204	0.02501	0.05218	2.00815	-0.33805
	BC001728.1	TCF3 fusion partner	IOH4430	TFPT		107	1635	4057	0.1586	0.01297	0.09691	0.04806	1.01463	1.80756
	NM_021809.2	TGFB-induced factor homeobox 2 (TGIF2)	IOH13079	TGIF2		94.5	2243	257.5	0.26189	0.05675	0.0357	0.0223	1.58077	-0.33635
	BC029920.1	Homeobox protein TGIF2LX	IOH22865	TGIF2LX		49.5	1824.5	1838	0.15713	0.12828	0.04155	-0.07043	1.19109	0.55546
	NM_138960.3	Homeobox protein TGIF2LX	IOH59763	TGIF2LX		116.5	5593.5	2823	0.12746	0.05423	0.08917	0.06763	4.70054	1.11126
	NM_018105.1	THAP domain containing, apoptosis associated protein 1 (THAP1), transcript variant 1	IOH10776	THAP1		143.5	1522.5	4570	0.17247	0.00882	0.04209	0.12326	0.90987	2.09702
	NM_015963.4	THAP domain containing 4 (THAP4)	IOH40797	THAP4		137	1027	4465	0.02065	0.20242	0.11054	0.10987	0.4485	2.03777
	BC000583.1	Thimet oligopeptidase	IOH22887	THOP1		46.5	1633	228.5	0.25851	0.01472	0.07117	-0.0766	1.01277	-0.35272
	BC015944.1	TIA1 cytotoxic granule-associated RNA binding protein (TIA1)	IOH10042	TIA1		141.5	1776.5	4721	0.1749	0.11901	0.03475	0.11914	1.14639	2.18222
	BC063500.1	Tigger transposable element-derived protein 1	IOH39897	TIGD1		234	989	5767.5	0.03022	0.06864	0.04941	0.30974	0.41312	2.77273
	BC011842.2	hypothetical protein FLJ11184 (FLJ11184)	IOH14099	TMA16		244	2051	9143.5	0.1449	0.2103	0.06983	0.33035	1.40199	4.67767
	BC005177.1	transmembrane protein 51 (TMEM51)	IOH4713	TMEM51		61	818	4177	0.11592	0.06051	0.04232	-0.04673	0.25389	1.87527
	NM_014547.3	Tropomodulin-3	IOH55947	TMOD3		73.5	1688	134	0.4714	0.2304	0.22163	-0.02097	1.06398	-0.40604
	NM_001190942	TRAIL Recombinant Human Protein		TNFSF10		56.5	1059.5	3267.5	0.06258	0.07809	0.0673	-0.056	0.47876	1.36207
	BC033792.1	tumor protein D52-like 3 (TPD52L3)	IOH21794	TPD52L3		1030.5	9309.5	4548	0.1736	0.08894	0.01088	1.95095	8.16065	2.08461
	BC027729.1	tetra-peptide repeat homeobox-like (TPRXL)	IOH14530	TPRXL		281.5	1443	4035	0.02261	0.11565	0.00946	0.40762	0.83586	1.79515
	BC028059.1	Tryptase, alpha, mRNA (cDNA clone MGC:39869 IMAGE:5181815), complete cds	IOH59056	TPSB2		444	2395.5	9035.5	0.00319	0.02509	0.09446	0.74245	1.72276	4.61674
	BC059174.1	TRAF3-interacting protein 1	IOH28851	TRAF3IP1		202.5	3168.5	7185	0.05238	0.0645	0.10865	0.24484	2.44253	3.57257
	BC016866.1	tripartite motif-containing 31 (TRIM31)	IOH10396	TRIM31		40.5	1966	56.5	0.01746	0.11294	0.413	-0.08897	1.32284	-0.44977
	BC009762.2	Tripartite motif-containing protein 41	IOH14113	TRIM41		122.5	2443	8727	0.01732	0.01274	0.00016	0.07999	1.767	4.44266
	NM_032765.1	tripartite motif-containing 52 (TRIM52)	IOH7015	TRIM52		75.5	1507	2867	0.21541	0.31531	0.19287	-0.01686	0.89545	1.13609
	BC002656.1	Thyroid receptor-interacting protein 11	IOH5254	TRIP11		189	2352	224	0.05238	0.05712	0.06945	0.21702	1.68226	-0.35526
	NM_024038.2	chromosome 19 open reading frame 43 (C19orf43)	IOH5926	TRIR		506.5	4817	11425.5	0.11867	0.06077	0.0643	0.87123	3.97751	5.96533
	NM_017646.3	tRNA isopentenyltransferase 1 (TRIT1)	IOH37769	TRIT1		79.5	1707.5	8373.5	0.06226	0.06502	0.04906	-0.00861	1.08214	4.2432
	BC057774.1	RNA (guanine-9-)-methyltransferase domain-containing protein 3	IOH29168	TRMT10B		422.5	2724	5492.5	0.10209	0.13914	0.02845	0.69815	2.02865	2.61756
	NM_017819.1	RNA (guanine-9-)-methyltransferase domain-containing protein 1, mitochondrial	IOH45746	TRMT10C		117.5	1884.5	6505.5	0.03009	0.08893	0.07946	0.06969	1.24695	3.18916
	BC045535.1	TRM1-like protein	IOH26895	TRMT1L		118.5	884	2694.5	0.0537	0.15038	0.0433	0.07175	0.31534	1.03875
	BC013352.1	HpaII tiny fragments locus 9c protein	IOH14736	TRMT2A		191	2406	7583	0.10366	0.06172	0.03879	0.22114	1.73254	3.79715
	NM_139169.2	TruB pseudouridine (psi) synthase homolog 1 (E. coli) (TRUB1)	IOH22254	TRUB1		313	2456.5	7877.5	0.11296	0.12349	0.05915	0.47252	1.77956	3.96332
	BC020975.1	tsukushin (TSKU)	IOH10376	TSKU		255	3767	1956.5	0	0.01352	0.00687	0.35301	2.99982	0.62233
	BC050616.1	tumor suppressing subtransferable candidate 4 (TSSC4)	IOH27025	TSSC4		89.5	2102	607.5	0.16591	0.03566	0.35966	0.012	1.44947	-0.13886
	NM_053006.1	testis-specific serine kinase 2 (TSSK2)		TSSK2	protein kinase	234.5	1917.5	3105.5	0.04523	0.02692	0.07309	0.31078	1.27767	1.27066
	PV3622	testis-specific serine kinase 2 (TSSK2)		TSSK2	protein kinase	90.5	1395	3064	0.14845	0.0588	0.03369	0.01406	0.79116	1.24724
	BC048970.1	tubulin tyrosine ligase-like family, member 7 (TTLL7)	IOH26893	TTLL7		406	2249	6941	0.00348	0.0283	0.04564	0.66415	1.58635	3.43489
	BC004233.1	tweety homolog 2 (Drosophila) (TTYH2)	IOH5231	TTYH2		133.5	2710.5	6559	0.0053	0.05244	0.00647	0.10266	2.01607	3.21934
	BC022344.1	twinfilin, actin-binding protein, homolog 1 (Drosophila) (TWF1)	IOH14799	TWF1		232	4012	9757	0.04267	0.0779	0.01594	0.30562	3.22795	5.02385
	NM_002822.3	twinfilin, actin-binding protein, homolog 1 (Drosophila) (TWF1)	IOH40883	TWF1		596	4016.5	6711.5	0.02136	0.13257	0.03003	1.05566	3.23214	3.30539
	BC028301.1	chromosome 18 open reading frame 56 (C18orf56)	IOH11759	TYMSOS		270	1013.5	2649	0.00524	0.02861	0.11104	0.38392	0.43593	1.01307
	BC012472.1	ubiquitin D (UBD)	IOH11069	UBD		46.5	857.5	4645.5	0.07603	0.08164	0.00381	-0.07661	0.29067	2.13962
	NM_006398.2	Ubiquitin D	IOH59996	UBD		473	1447.5	6752	0.03588	0.15388	0.10054	0.80221	0.84004	3.32824
	NM_152653.1	ubiquitin-conjugating enzyme E2E 2 (UBC4/5 homolog, yeast) (UBE2E2)	IOH13176	UBE2E2		112.5	2276	10006.5	0.10685	0.05468	0.06819	0.05938	1.61149	5.16464
	BC004236.2	ubiquitin-conjugating enzyme E2S (UBE2S)	IOH3887	UBE2S		1290.5	3739.5	10500	0.4367	0.007	0.01791	2.48669	2.97421	5.44309
	NM_025241.1	UBX domain containing 1 (UBXD1)	IOH41143	UBXN6		100	2157.5	583.5	0.19799	0.05998	0.27024	0.03363	1.50115	-0.15241
	BC047420.1	UBX domain-containing protein 7	IOH26512	UBXN7		180.5	2066.5	31.5	0.20763	0.09684	0.11224	0.1995	1.41642	-0.46388
	NM_005659.1	ubiquitin fusion degradation 1 like (yeast) (UFD1L), transcript variant 1, mRNA.	IOH4744	UFD1		412	2498	4348.5	0.08581	0.19475	0.02098	0.67651	1.8182	1.97204
	NM_080911.1	uracil-DNA glycosylase (UNG), transcript variant 2	IOH43486	UNG		221.5	1714.5	6934	0.11812	0.10104	0.03161	0.28398	1.08865	3.43094
	BC023569.1	UPF3 regulator of nonsense transcripts homolog A (yeast) (UPF3A)	IOH27860	UPF3A		334.5	2189	8192.5	0.12895	0.1389	0.01752	0.51682	1.53049	4.14106
	BC041366.2	ubiquitin specific peptidase 2 (USP2)	IOH27747	USP2		623	3861.5	6896	0.02043	0.01886	0.0121	1.11129	3.08781	3.4095
	NM_006590.2	ubiquitin specific peptidase 39 (USP39)	IOH45672	USP39		296	2770.5	6432	0.11467	0.3443	0.80319	0.43749	2.07194	3.14768
	NM_032929.1	ubiquitin specific protease 45 (USP45)	IOH7540	USP45		47.5	571.5	4631.5	0.16375	0.0631	0.09054	-0.07455	0.02437	2.13173
	BC005955.1	chromosome 8 open reading frame 53 (C8orf53)	IOH7485	UTP23		53.5	1110.5	4470.5	0.01322	0.21204	0.08019	-0.06218	0.52625	2.04088
	BC022964.1	chromosome 1 open reading frame 107 (C1orf107)	IOH10646	UTP25		38.5	1390.5	6214.5	0.01837	0.1134	0.03288	-0.09309	0.78697	3.02496
	BC025776.1	Urotensin-2	IOH11913	UTS2		74	847.5	3356.5	0.01911	0.11431	0.03223	-0.01994	0.28136	1.41229
	BC098149.1	Variable charge X-linked protein 3	IOH63298	VCX		146.5	1597.5	6426.5	0.04344	0.02434	0.0274	0.12945	0.97972	3.14458
	BC056508.1	variable charge, Y-linked 1B (VCY)	IOH29456	VCY1B		56	723.5	5039.5	0.10102	0.11435	0.14101	-0.05703	0.1659	2.36195
	NM_015289.2	vacuolar protein sorting 39 homolog (S. cerevisiae) (VPS39)	IOH40537	VPS39		48	1112.5	4473.5	0.35355	0.03114	0.16328	-0.07351	0.52811	2.04257
	NM_014622.4	loss of heterozygosity, 11, chromosomal region 2, gene A (LOH11CR2A), transcript variant 1	IOH41880	VWA5A		123.5	1451	5516	0.10879	0.00585	0.05743	0.08206	0.8433	2.63082
	NM_004184.3	Tryptophanyl-tRNA synthetase, cytoplasmic	IOH59105	WARS1		4	234.5	3683.5	2.47487	0.14172	0.05663	-0.16418	-0.28943	1.5968
	NM_213645.1	tryptophanyl-tRNA synthetase (WARS), transcript variant 3	IOH45767	WARS1		18.5	575.5	3917.5	0.11467	0.15604	0.04386	-0.1343	0.02809	1.72884
	NM_007075.3	WD repeat domain 45 (WDR45), transcript variant 1	IOH45934	WDR45		93.5	1778.5	2766.5	0.14369	0.02664	0.05649	0.02024	1.14825	1.07938
	NM_017588.1	WD repeat domain 5 (WDR5), transcript variant 1	IOH4895	WDR5		171	1826	6388	0.04962	0.02943	0.33518	0.17993	1.19248	3.12285
	BC002914.1	WAS/WASL-interacting protein family member 1	IOH5733	WIPF1		471	6588	10197.5	0.15613	0.01159	0.02975	0.79808	5.62656	5.27241
	BC096708.1	Wilms tumor-associated protein	IOH63336	WT1-AS		615	1856.5	8138	0.09658	0.11541	0.0073	1.0948	1.22088	4.11031
	BC035601.1	WWC family member 3 (WWC3)	IOH27560	WWC3		64	627.5	2973.5	0.04419	0.41356	0.03876	-0.04055	0.07651	1.19618
	BC000108.1	WW domain containing E3 ubiquitin protein ligase 2 (WWP2)	IOH4735	WWP2		226	2317	6476	0.03755	0.00855	0.07447	0.29325	1.64967	3.17251
	NM_133430.1	G antigen, family D, 2 (GAGED2), transcript variant 3, mRNA	IOH50108	XAGE1B		163.5	1450.5	4296.5	0.01297	0.13601	0.08147	0.16447	0.84284	1.9427
	NM_005433.2	v-yes-1 Yamaguchi sarcoma viral oncogene homolog 1 (YES1)	IOH26758	YES1	protein kinase	41.5	1687.5	79	0.18743	0.07584	0.0358	-0.08691	1.06352	-0.43708
	NM_001005404.3	Protein yippee-like 2	IOH58661	YPEL2		324.5	1726	2827	0.05012	0.00328	0.01201	0.49622	1.09936	1.11352
	NM_017798.2	YTH domain family, member 1 (YTHDF1), mRNA	IOH25880	YTHDF1		59.5	1465	4216	0.13073	0.04441	0.08285	-0.04982	0.85634	1.89728
	BC002559.1	YTH domain family, member 2 (YTHDF2)	IOH4053	YTHDF2		315	2517.5	8322	0.0449	0.08567	0.06831	0.47664	1.83636	4.21413
	BC004259.1	chromosome 14 open reading frame 140 (C14orf140)	IOH5453	ZC2HC1C		227	1817.5	2826	0.01869	0.0214	0.04204	0.29532	1.18457	1.11295
	BC034435.1	zinc finger CCCH-type containing 3 (ZC3H3)	IOH21500	ZC3H3		222	1949.5	4043.5	0.05096	0.06638	0.03795	0.28502	1.30748	1.79994
	BC000190.1	zinc finger, C3HC-type containing 1 (ZC3HC1)	IOH4410	ZC3HC1		136	1095.5	2928.5	0.0208	0.02388	0.08958	0.10781	0.51228	1.17079
	NM_017665.1	Zinc finger CCHC domain-containing protein 10	IOH7282	ZCCHC10		142	1482	7595	0.08963	0.03054	0.02607	0.12018	0.87216	3.80391
	NM_016505.2	zinc finger, CCHC domain containing 17 (ZCCHC17)	IOH6093	ZCCHC17		443.5	2565	8521.5	0.05899	0.05679	0.03327	0.74142	1.88059	4.32671
	BC022543.1	MADP-1 protein, mRNA (cDNA clone MGC:26805 IMAGE:4797962), complete cds	IOH55985	ZCRB1		110.5	1172	3596	0.0192	0.1448	0.06686	0.05527	0.58352	1.54744
	NM_006298.2	zinc finger protein 192 (ZNF192)	IOH34757	ZKSCAN8		533	2873	5964.5	0.10613	0.03839	0.04991	0.92584	2.16738	2.88389
	BC007048.1	zinc finger, MYM-type 5 (ZMYM5)	IOH7230	ZMYM5		1246.5	13312.5	648	0.04708	0.09428	0.06329	2.39602	11.888	-0.11602
	BC026030.1	zinc finger protein 239 (ZNF239)	IOH14611	ZNF239		192	2178.5	1513	0.25043	0.1003	0.08599	0.2232	1.52071	0.37207
	BC053901.1	zinc finger protein 280A (SUHW1)	IOH29032	ZNF280A		190	1220	3866	0.11909	0.00116	0.03695	0.21908	0.62821	1.69978
	BC040020.2	zinc finger protein 280B (SUHW2)	IOH26263	ZNF280B		764.5	4153	8318	0.05642	0.01805	0.02516	1.40285	3.35924	4.21188
	BC046449.1	Zinc finger protein 845	IOH28670	ZNF321P		111.5	852.5	2805.5	0.10781	0.0423	0.00479	0.05733	0.28602	1.10138
	NM_012279.1	zinc finger protein 346 (ZNF346)	IOH6492	ZNF346		462.5	1900	6625	0.0474	0.08262	0.01025	0.78057	1.26139	3.25658
	NM_033414.1	zinc finger protein 622 (ZNF622)	IOH10240	ZNF622		65.5	1413.5	4446.5	0.11875	0.0025	0.19417	-0.03746	0.80839	2.02734
	BC000157.2	zinc finger protein 691 (ZNF691)	IOH2943	ZNF691		83	1023.5	3378.5	0.01704	0.10018	0.06635	-0.0014	0.44524	1.4247
	NM_016096.1	zinc finger protein 706 (ZNF706), transcript variant 2	IOH10050	ZNF706		279	2477.5	8367.5	0.08617	0.02826	0.00397	0.40246	1.79912	4.23981
	BC033230.1	zinc finger protein 808 (ZNF808)	IOH23262	ZNF808		348	2932.5	3805.5	0.02438	0.06197	0.00576	0.54464	2.22278	1.66565
	NM_018335.2	chromosome 14 open reading frame 131 (C14orf131)	IOH45711	ZNF839		153	3756	44	0.05546	0.01694	0.19285	0.14284	2.98958	-0.45683
	NM_152736.2	Zinc finger protein 187	IOH14153	ZSCAN26		140	1355.5	3645.5	0.15152	0.06103	0.07157	0.11605	0.75438	1.57537
	NM_145909.1	Zinc finger protein 323	IOH45888	ZSCAN31		154.5	2187.5	3988.5	0.46225	0.00937	0.02252	0.14593	1.52908	1.76891
	BC010467.1	cDNA clone MGC:17410 IMAGE:4156035, complete cds	IOH11119			508	3230.5	11178.5	0.08908	0.09215	0.04396	0.87433	2.50027	5.82595
	BC011600.1	cDNA clone IMAGE:3050953, **** WARNING: chimeric clone ****	IOH13680			795	8945.5	9474.5	0.01067	0.02174	0.06486	1.4657	7.82171	4.86444
	histone	histone				124	1370	4869	0.35355	0.0671	0.05083	0.08309	0.76788	2.26574
	TopoI	TopoI				147.5	2467.5	5577.5	0.00479	0.09657	0.00114	0.13151	1.78981	2.66552
	U1snRNP68	U1snRNP68				48	1043	3691	0	0.31186	0.01801	-0.07352	0.4634	1.60104

## Sheet: Gene Ontology
	Category	Term	Count	%	P-Value	Genes	List Total	Pop Hits	Pop Total	Fold Enrichment	Benjamini	FDR (%)		Gene Ontology (GO) enrichment analysis
	GOTERM_MF_DIRECT	GO:0044822~poly(A) RNA binding	154	20.21	3.76029e-35	HMGN2, RPL14, TRMT2A, EIF5, RPS27L, PYM1, SRP19, NSRP1, APOBEC3C, GTF2E2, TRMT1L, RBM8A, TIA1, LRRC59, LUC7L2, FAU, EIF1, DDX21, RPL11, PTBP2, GNL2, DHX32, GNL3, SNRPA1, CHTOP, GTPBP4, RPUSD2, EMG1, BYSL, YTHDF2, YTHDF1, MARK2, RSL1D1, RPS19, ABT1, EIF2S1, EIF2S2, LLPH, SNRPA, EDF1, RPS10, FIP1L1, CNBP, HMGB2, SRSF10, MRPS11, ZCRB1, C1ORF131, PIN4, PPAN, DDX47, RPS28, HNRNPK, DDX49, SPATS2, HNRNP…	696	524	6496	2.743	2.50812e-32	5.63409e-32		Enriched GO terms from a DAVID analysis using the ProtoArray hits as a foreground and all proteins assayed on the ProtoArray as a specific background.
	GOTERM_CC_DIRECT	GO:0005634~nucleus	329	43.1759	8.577e-22	HMGN1, KIFC1, HMGN3, HMGN2, PTTG2, AURKA, NSRP1, CITED1, C16ORF78, BTK, ISG20, TRMT1L, WWP2, RBM8A, PQBP1, CREB3L2, SMOX, PTBP2, POLL, GTPBP4, MCRS1, ZC3HC1, POLI, VWA5A, TFPT, TIGD1, EMG1, BYSL, PIM1, LIG3, HMG20A, TEX30, PNKP, ABT1, EIF2S1, ZNF239, EIF2S2, TGIF2, SURF2, SUDS3, IRAK1BP1, PPP2R3B, TADA3, SRSF10, NFKBIB, STK17B, OAS1, CHEK1, PIN4, OCRL, COIL, ADAP1, DTD1, PPAN, HEXIM2, DMD, SLC4A1…	687	2125	6774	1.5266	4.25419e-19	1.23373e-18
	GOTERM_CC_DIRECT	GO:0005654~nucleoplasm	224	29.3963	2.55727e-19	HMGN1, HMGN3, AURKA, ISG20, RBM8A, CREB3L2, PQBP1, FAU, RPL11, NUP35, POLL, MCRS1, CHTOP, POLI, TFPT, VWA5A, EMG1, BYSL, LIG3, PNKP, RPS19, NOL4L, TGIF2, RPS10, SUDS3, NEK7, PPP2R3B, FIP1L1, TADA3, GNAI2, SRSF10, ZCRB1, CHEK1, COIL, RPS28, HEXIM2, NUP50, CDC40, SLC4A1AP, SNRNP35, NKRF, DHX8, AEBP2, MAP2K3, SREK1, EME1, RYBP, SMYD3, CDC20, SRSF3, UPF3A, SRSF5, CBLB, METTL14, NOLC1, SRSF6, RGS3, SR…	687	1292	6774	1.70952	6.34204e-17	3.67842e-16
	GOTERM_CC_DIRECT	GO:0005730~nucleolus	95	12.4672	3.35076e-16	FGF13, PYM1, ZNF346, MCM10, SRP19, ISG20, EED, DDX21, RPL11, GNL2, CUTC, GNL3, KIF2A, SRPK2, GTPBP4, CHTOP, MCRS1, TFPT, EMG1, BYSL, DFFB, NOL7, TRIM41, APTX, NUSAP1, ZCCHC17, CARF, RSL1D1, PNKP, RPS19, RPAIN, ABT1, LLPH, NOL4L, SMARCA5, EDF1, UBD, SNRPA, RPS10, SURF2, SPATS2L, NOL12, MEAF6, ING3, HMGB2, APEX2, MTDH, YPEL2, SNRPB2, CETN3, RPL36, PIN4, FCF1, COIL, DIMT1, PPAN, DDX47, EZR, METTL1, …	687	396	6774	2.36547	5.50671e-14	4.77396e-13
	GOTERM_MF_DIRECT	GO:0003723~RNA binding	64	8.39895	2.5535e-12	SRSF1, RPL14, CWC15, CNP, PDCD4, PUS7L, TRMT1L, RBM8A, TIA1, RPL39L, RBMS3, FAU, RPL11, PTBP2, EMG1, SF1, YTHDF2, RSL1D1, LARP6, ABT1, LARP7, ZNF239, EIF2S2, NOL4L, SNRPA, TRUB1, ZC3H3, SRSF10, RPS15A, ZCRB1, RPL38, RPL30, RPS28, HNRNPK, AGGF1, RPL31, HNRNPF, NPM1, AGO1, HNRNPC, SNRNP70, NOVA1, DDX43, ADARB1, RBM23, RAD51AP1, RPL26, ANKHD1, SNURF, RPL29, SRSF3, UPF3A, PPIE, SRSF5, PPP1R8, RPL22, …	696	238	6496	2.5098	8.51597e-10	3.82596e-09
	GOTERM_BP_DIRECT	GO:0000398~mRNA splicing, via spliceosome	38	4.98688	2.94659e-11	SRSF1, FIP1L1, SRSF10, SNRPB2, CWC15, ZCRB1, BUD31, SF3B2, HNRNPK, RBM8A, HNRNPF, CDC40, DNAJC8, USP39, HNRNPC, SNRNP70, SNRNP35, DHX32, NOVA1, DHX8, SNRPA1, RBM41, SF1, PRPF4, SNURF, SRSF3, PPIE, SRSF5, METTL14, SRSF6, GTF2F1, SRSF9, PSPC1, SYF2, SNRPA, SNRNP40, RNPC3, RBM15	655	112	6398	3.31412	7.46371e-08	5.20584e-08
	GOTERM_MF_DIRECT	GO:0000166~nucleotide binding	41	5.38058	2.33375e-10	SRSF1, RBM33, SRSF10, CPEB4, TRMT2A, SNRPB2, ZCRB1, RBM8A, HNRNPF, TIA1, RBMS3, HNRNPC, SNRNP70, PTBP2, SNRNP35, NUP35, RBM42, RBM23, RBM41, SREK1, G3BP1, RPL23A, RCAN1, SRSF3, UPF3A, PPIE, LARP6, SRSF5, LARP4, SRSF6, ABT1, LARP7, SRSF9, SRSF8, PSPC1, SNRPA, CIRBP, RNPC3, NELFE, RBM15, RBM17	696	130	6496	2.94359	5.18871e-08	3.49669e-07
	GOTERM_CC_DIRECT	GO:0022625~cytosolic large ribosomal subunit	16	2.09974	3.78068e-08	ZNF622, RPL14, RPL26, RPL36, RPL23A, RPL38, ZCCHC17, RPL29, RSL1D1, RPL30, RPL31, RPL22, RPL39L, RPL26L1, RPL11, RSL24D1	687	30	6774	5.25881	4.68804e-06	5.43819e-05
	GOTERM_BP_DIRECT	GO:0006364~rRNA processing	31	4.06824	6.06413e-08	RPL14, NOB1, RPL36, RPS15A, RPS27L, RPL38, RIOK1, PIN4, FCF1, ISG20, RPL30, DDX47, RPS28, DDX49, RPL31, RPL26L1, FAU, DDX21, RPL11, EMG1, BYSL, RPL26, RPL23A, RPL29, RPS19, CSNK1D, NOLC1, CSNK1E, RPL22, RPS10, PES1	655	103	6398	2.93987	7.67993e-05	0.000107137
	GOTERM_MF_DIRECT	GO:0003676~nucleic acid binding	55	7.21785	8.4475e-08	SRSF1, ZKSCAN8, CPEB4, TRMT2A, ZNF346, ISG20, TIA1, PTBP2, ZNF280A, RBM42, ZCCHC10, G3BP1, ZCCHC17, NABP2, ZNF691, GPATCH11, ZNF808, RBM33, CNBP, SRSF10, ZCRB1, DDX47, DDX49, AGGF1, HNRNPF, NPM1, AGO1, ZSCAN26, THAP1, HNRNPC, SNRNP70, SNRNP35, DDX42, NKRF, DHX8, AEBP2, RBM23, SREK1, DDX6, SRSF3, DDX58, PPIE, SRSF5, ZSCAN31, SRSF9, SRSF8, PSPC1, CIRBP, GPATCH4, RNPC3, DDX54, NELFE, RBM15, RBM17, T…	696	243	6496	2.11248	1.40861e-05	0.00012657
	GOTERM_BP_DIRECT	GO:0006281~DNA repair	34	4.46194	1.17954e-07	APEX2, UNG, FOXM1, FAAP24, RPS27L, CHEK1, BOD1L1, NPM1, APEX1, ERCC1, FEN1, EXO1, POLL, CDK1, MCRS1, RAD51AP1, POLI, TFPT, PDS5A, EME1, LIG3, APTX, EEPD1, PNKP, RPAIN, NABP2, CSNK1D, CSNK1E, SUPT16H, ALKBH1, ALKBH3, SMC1A, ASTE1, USP45	655	123	6398	2.70008	9.95874e-05	0.000208393
	GOTERM_CC_DIRECT	GO:0005681~spliceosomal complex	19	2.49344	1.85263e-07	DHX8, SNRPA1, SREK1, CWC15, SNRPB2, SF1, PRPF4, BUD31, SNURF, SF3B2, PPP1R8, CDC40, USP39, SNRPA, SNRNP70, HNRNPC, PTBP2, DHX32, RBM17	687	46	6774	4.07272	1.83779e-05	0.000266484
	GOTERM_BP_DIRECT	GO:0006413~translational initiation	24	3.14961	4.57606e-07	ABCF1, RPL14, EIF5, RPL26, RPS15A, RPL36, RPL23A, EIF2A, RPL38, RPL29, LARP1, RPL30, RPS19, RPS28, RPL22, RPL31, EIF2S1, EIF2S2, EIF1AY, RPL26L1, FAU, EIF1, RPS10, RPL11	655	73	6398	3.21138	0.000289737	0.000808465
	GOTERM_BP_DIRECT	GO:0008380~RNA splicing	25	3.28084	7.09323e-07	DHX8, SRPK2, SNRPA1, SREK1, SAP18, ZCRB1, NSRP1, PRPF4, SRPK1, SNURF, SF3B2, DDX47, PPP1R8, RBM8A, CDC40, USP39, SRSF8, SNRNP40, SNRNP35, RNPC3, SNRNP70, HNRNPC, ARL6IP4, NOVA1, PRPF38A	655	80	6398	3.05248	0.000359279	0.00125318
	GOTERM_CC_DIRECT	GO:0016607~nuclear speck	24	3.14961	2.98837e-06	CSNK1A1, SRSF1, CHTOP, SRSF10, LMNA, SAP18, NSRP1, PRPF4, SRSF3, SARNP, SRSF5, AGGF1, SRSF6, PPP1R8, RBM8A, DYRK1A, PQBP1, PSPC1, LUC7L2, SNRNP70, ARL6IP4, APEX1, RBM15, DDX42	687	81	6774	2.92156	0.000247008	0.00429843
	GOTERM_CC_DIRECT	GO:0071013~catalytic step 2 spliceosome	15	1.9685	6.9471e-06	SRSF1, DHX8, SNRPA1, CWC15, SNRPB2, SNURF, SF3B2, PPIE, HNRNPK, RBM8A, HNRNPF, CDC40, SYF2, SNRNP40, HNRNPC	687	37	6774	3.9974	0.000492132	0.00999235
	GOTERM_CC_DIRECT	GO:0005840~ribosome	25	3.28084	9.24749e-06	ABCF1, RPL14, MRPS11, SF1, RPS15A, RPL36, RPL23A, RPS27L, RPL38, DENR, RPL29, RPL30, RPS6KA3, RPS19, RPS28, RPL22, RPL31, EIF2S1, TMA16, FAU, RPL11, RPS10, RSL24D1, APEX1, SERP1	687	92	6774	2.67942	0.000573183	0.0133009
	GOTERM_BP_DIRECT	GO:0000184~nuclear-transcribed mRNA catabolic process, nonsense-mediated decay	19	2.49344	1.03715e-05	RPL14, RPL26, RPS15A, RPL36, RPL23A, PYM1, RPL38, RPL29, UPF3A, RPL30, RPS19, RPS28, RPL22, RPL31, RBM8A, RPL26L1, FAU, RPL11, RPS10	655	58	6398	3.19984	0.00436895	0.0183221
	GOTERM_BP_DIRECT	GO:0019083~viral transcription	18	2.3622	1.476e-05	RPL14, RPL26, RPS15A, RPL36, RPL23A, RPL38, RPL29, RPL30, RPS19, RPS28, RPL31, RPL22, NUP50, RPL26L1, FAU, RPL11, RPS10, NUP35	655	54	6398	3.25598	0.00532681	0.0260738
	GOTERM_CC_DIRECT	GO:0030529~intracellular ribonucleoprotein complex	18	2.3622	1.72216e-05	CSNK1A1, SNRPA1, G3BP1, SNRPB2, LARP1B, NSRP1, ZCCHC17, LARP6, HNRNPK, CSNK1E, RPL22, LARP7, HNRNPF, GSK3B, DYRK1A, NPM1, AGO1, HNRNPC	687	55	6774	3.22699	0.000948662	0.024769
	GOTERM_BP_DIRECT	GO:0006614~SRP-dependent cotranslational protein targeting to membrane	17	2.23097	2.76188e-05	RPL14, RPL26, RPL36, RPS15A, RPL23A, RPL38, SRP19, RPL29, RPL30, RPS19, RPS28, RPL31, RPL22, RPL26L1, FAU, RPL11, RPS10	655	51	6398	3.25598	0.00870679	0.0487838
	GOTERM_BP_DIRECT	GO:0045727~positive regulation of translation	12	1.5748	7.21504e-05	ABCF1, UPF3A, TARBP2, PRR16, NPM1, RBMS3, CIRBP, RPS27L, RPS6KB1, PYM1, SERP1, LARP1	655	29	6398	4.04191	0.0201023	0.127394
	GOTERM_MF_DIRECT	GO:0003677~DNA binding	77	10.105	7.93424e-05	HMGN1, HMGN3, HMGN2, E2F6, PPARG, FANCM, GTF2E2, MCM7, HSF1, PQBP1, TBPL1, POLL, ZNF280A, ZNF280B, TIGD1, TFPT, BEND5, DFFB, G3BP1, LIG3, APTX, NUSAP1, HMG20A, FOSB, HMGA1, EEPD1, CARF, SARNP, SYCP3, ABT1, ZNF239, TFAP2B, SMARCA5, TGIF2, ZC3H3, ZNF808, CNBP, HMGB2, APEX2, THAP4, HMGB4, FOXM1, TGIF2LX, FAAP24, NOSTRIN, PIN4, DTD1, HNRNPK, NPM1, ZSCAN26, CHD2, RNF11, TCEA1, TCEA2, BAZ2B, TCF25, DUX…	696	466	6496	1.5422	0.0105289	0.118814
	GOTERM_BP_DIRECT	GO:0006397~mRNA processing	21	2.75591	9.16315e-05	SRSF1, RBM23, ADARB1, KHDRBS2, SREK1, SAP18, NSRP1, SRPK1, SF3B2, DDX47, SRSF5, AGGF1, PPP1R8, RBM8A, SRSF9, USP39, SRSF8, SNRNP70, PTBP2, ARL6IP4, PRPF38A	655	79	6398	2.59654	0.022944	0.161765
	GOTERM_BP_DIRECT	GO:0006405~RNA export from nucleus	10	1.31234	0.000109319	SRSF3, SRSF1, SARNP, SRSF5, CHTOP, SRSF6, RBM8A, SRSF9, CDC40, NUP62CL	655	21	6398	4.6514	0.0248603	0.192962
	GOTERM_BP_DIRECT	GO:0048025~negative regulation of mRNA splicing, via spliceosome	7	0.918635	0.000163304	RBM42, HNRNPK, SRSF10, SRSF6, SRSF9, DYRK1A, SAP18	655	10	6398	6.83756	0.0338862	0.288123
	GOTERM_BP_DIRECT	GO:0006412~translation	27	3.54331	0.000296437	ABCF1, RPL14, CPEB4, HBS1L, MRPS11, RPL26, RPS15A, RPS6KB2, RPL36, RPL23A, RPS27L, MRPS6, RPL38, RPL29, RSL1D1, RPL30, RPS19, RPS28, MRPL28, RPL22, RPL31, RPL39L, RPL26L1, FAU, RPL11, RPS10, RSL24D1	655	125	6398	2.10987	0.0561313	0.522434
	GOTERM_MF_DIRECT	GO:0003729~mRNA binding	16	2.09974	0.000301936	SRSF1, ADARB1, PAIP2, G3BP1, EIF2A, DENR, NSRP1, METTL14, PPP1R8, RBM8A, LUC7L2, SLC4A1AP, SNRNP35, SNRNP70, PTBP2, NOVA1	696	53	6496	2.81761	0.0330131	0.451441
	GOTERM_CC_DIRECT	GO:0005737~cytoplasm	285	37.4016	0.000305466	HMGN1, HMGN3, HMGN2, RPL14, EHHADH, PTTG2, CITED1, BTK, ISG20, WWP2, RBM8A, PQBP1, RPL11, SMOX, DHX32, TBPL1, GTPBP4, MCRS1, LRRC6, TFPT, EMG1, BYSL, PIM1, MARK4, SCEL, MARK1, GCC1, GRB10, RPS19, LCA5, EIF2S1, EIF2S2, NOL4L, SUDS3, IRAK1BP1, NEK7, OSTF1, GNAI2, SRSF10, ASZ1, IFI30, OAS1, PIN4, OCRL, AKAP14, ADAP1, DTD1, LIF, SH3BP5L, RPS28, AGGF1, HEXIM2, SPATS2, STX17, NUP50, SKA3, SLC4A1AP, CDC…	687	2394	6774	1.17384	0.0150392	0.43849
	GOTERM_BP_DIRECT	GO:0006369~termination of RNA polymerase II transcription	11	1.44357	0.00038252	SRSF3, SRSF1, SARNP, SRSF5, FIP1L1, CHTOP, SRSF6, RBM8A, SRSF9, CDC40, SSU72	655	29	6398	3.70508	0.0668805	0.673661
	GOTERM_MF_DIRECT	GO:0003725~double-stranded RNA binding	12	1.5748	0.000411584	DDX58, TARBP2, ADARB1, MTDH, PRKRA, AGO1, APTX, DDX21, OAS1, ZNF346, DHX58, STAU1	696	33	6496	3.39394	0.0384667	0.614909
	GOTERM_BP_DIRECT	GO:0048024~regulation of mRNA splicing, via spliceosome	6	0.787402	0.000473172	SRSF3, SRPK2, KHDRBS2, SRSF10, TIA1, SRPK1	655	8	6398	7.32595	0.0768115	0.83268
	GOTERM_BP_DIRECT	GO:0006406~mRNA export from nucleus	13	1.70604	0.000569607	SRSF1, CHTOP, FIP1L1, SRSF10, SRSF3, SARNP, SRSF5, RBM8A, SRSF6, SRSF9, CDC40, NUP50, NUP35	655	41	6398	3.09715	0.0862531	1.00158
	GOTERM_BP_DIRECT	GO:0006376~mRNA splice site selection	7	0.918635	0.000600073	SRSF1, SRSF5, SRSF10, SRSF6, SRSF9, LUC7L2, PTBP2	655	12	6398	5.69796	0.0855547	1.05488
	GOTERM_BP_DIRECT	GO:0042273~ribosomal large subunit biogenesis	7	0.918635	0.000600073	ZNF622, RPL14, NOP16, RPL26, RPL26L1, RPL11, PES1	655	12	6398	5.69796	0.0855547	1.05488
	GOTERM_BP_DIRECT	GO:0031124~mRNA 3'-end processing	10	1.31234	0.000726716	SRSF3, SRSF1, SARNP, SRSF5, FIP1L1, CHTOP, SRSF6, RBM8A, SRSF9, CDC40	655	26	6398	3.7569	0.0972434	1.27617
	GOTERM_MF_DIRECT	GO:0004004~ATP-dependent RNA helicase activity	10	1.31234	0.000732307	DHX8, DDX47, DDX49, G3BP1, DDX21, DDX54, DDX43, DHX32, DDX42, DDX6	696	25	6496	3.73333	0.0528445	1.09162
	GOTERM_CC_DIRECT	GO:0005694~chromosome	12	1.5748	0.00077022	HMGB4, PDS5A, CENPB, LLPH, NEIL1, SUPT16H, NUSAP1, C1ORF131, HORMAD2, SMC1A, PES1, BOD1L1	687	37	6774	3.19792	0.0341467	1.1022
	GOTERM_BP_DIRECT	GO:0002181~cytoplasmic translation	6	0.787402	0.000975261	RPL22, RPL31, RPL26, RPL26L1, RPL36, RPL29	655	9	6398	6.51196	0.121976	1.7091
	GOTERM_BP_DIRECT	GO:0006468~protein phosphorylation	51	6.69291	0.00121406	PDGFB, RPS6KB2, AURKA, RPS6KB1, EIF2A, LATS1, BTK, CSNK2A2, CSNK2A1, HSF1, CDK16, MATK, SRPK3, SRPK2, LIMK1, CSNK1G2, PRKCI, PIM1, CDK6, CDK7, CDKL3, MARK4, MARK1, SRPK1, MARK2, GAK, SCYL2, LCK, NEK7, STK17B, MKNK1, RIOK1, CAMKV, STK40, PRKRA, DYRK3, DCLK1, PIK3R1, TEC, CSNK1A1, RPS6KA3, CSNK1D, CSNK1E, PLK1, GSK3A, FYN, GSK3B, DYRK1A, GRK6, TSSK2, GRK4	655	319	6398	1.56165	0.142603	2.12335
	GOTERM_CC_DIRECT	GO:0010494~cytoplasmic stress granule	8	1.04987	0.00124028	TIA1, EIF2S1, G3BP1, PQBP1, CIRBP, GRB7, STAU1, DDX6	687	18	6774	4.38234	0.0500031	1.7693
	GOTERM_CC_DIRECT	GO:0005876~spindle microtubule	10	1.31234	0.00124809	CDK1, KIF3B, KIF3A, CSNK1D, PLK1, PSRC1, NUSAP1, SKA3, AURKA, KIF2A	687	28	6774	3.52152	0.0465319	1.78036
	GOTERM_BP_DIRECT	GO:0006606~protein import into nucleus	9	1.1811	0.00138651	RPAIN, NUP50, NUP62CL, KPNA6, PPP1R10, KPNA3, KPNA2, ING1, KPNA1	655	23	6398	3.82224	0.154101	2.42149
	GOTERM_BP_DIRECT	GO:0016055~Wnt signaling pathway	19	2.49344	0.00197959	CSNK1A1, CSNK1G1, CSNK1G2, BTRC, CTNND1, MARK4, MARK1, MARK2, CSNK2A2, CSNK2A1, SOST, CSNK1D, CSNK1E, DACT3, GSK3A, GSK3B, PLCG2, GRK6, CSNK1G3	655	85	6398	2.18342	0.203994	3.44031
	GOTERM_BP_DIRECT	GO:0006396~RNA processing	13	1.70604	0.00212545	DHX8, ADARB1, TRMT2A, PRPF4, RNGTT, LARP6, HNRNPK, AGGF1, LARP7, HNRNPF, SNRNP40, DDX54, NOVA1	655	47	6398	2.70177	0.208896	3.68932
	GOTERM_CC_DIRECT	GO:0035267~NuA4 histone acetyltransferase complex	5	0.656168	0.00284116	MSL3, MEAF6, ING3, KAT5, MRGBP	687	7	6774	7.04304	0.0958876	4.00997
	GOTERM_BP_DIRECT	GO:0006366~transcription from RNA polymerase II promoter	29	3.80577	0.00298741	FOXM1, BMPR2, RNGTT, BATF, GTF2E2, BARX1, HNRNPK, WWP2, CREB3L2, BTF3, TCEA1, DDX21, ETV5, TRIP11, TBPL1, BATF3, SUB1, GRHL3, CDK7, FOSB, HMGA1, CARF, CSRNP3, ABT1, GTF2F1, SUPT16H, NELFA, TFAP2B, NELFE	655	160	6398	1.77044	0.270772	5.14859
	GOTERM_CC_DIRECT	GO:0005874~microtubule	25	3.28084	0.00310176	DYNC1I1, GAS2L3, KIFC1, KIF3B, GABARAPL1, KIF3A, EHHADH, NUSAP1, AURKA, CNP, FGF13, TTLL7, REEP3, MARK4, GABARAP, KIFC3, FSD1, KIF2C, CEP57, MAP1LC3A, CFAP20, KIF26A, DCX, NEK7, KIF2A	687	132	6774	1.86747	0.0976242	4.37018
	GOTERM_MF_DIRECT	GO:0003682~chromatin binding	25	3.28084	0.00337202	HMGN1, HMGN3, PPARG, FAAP24, NAP1L2, CITED1, FANCM, CENPB, NPM2, EED, EXO1, CDK1, BEND6, APTX, SNAI2, HMGA1, FOXP1, NELFA, TFAP2B, RIT2, VCX, NELFE, SMC1A, RBPJ, HDAC7	696	126	6496	1.85185	0.201718	4.93494
	GOTERM_BP_DIRECT	GO:0030178~negative regulation of Wnt signaling pathway	7	0.918635	0.00363565	BARX1, GRB10, DKK1, CSNK1E, DACT3, TSKU, CITED1	655	16	6398	4.27347	0.308599	6.23226
	GOTERM_BP_DIRECT	GO:0045070~positive regulation of viral genome replication	7	0.918635	0.00363565	PPIE, SRPK2, TARBP2, ADARB1, SRPK1, STAU1, LARP1	655	16	6398	4.27347	0.308599	6.23226
	GOTERM_BP_DIRECT	GO:0010501~RNA secondary structure unwinding	8	1.04987	0.00364371	DDX47, DDX49, AGO1, DDX21, DDX54, DDX43, DDX42, DDX6	655	21	6398	3.72112	0.299268	6.24566
	GOTERM_MF_DIRECT	GO:0008017~microtubule binding	19	2.49344	0.00374662	DYNC1I1, GAS2L3, KIFC1, KIF3B, KIF3A, PSRC1, NUSAP1, FGF13, MARK4, GABARAP, KIFC3, TRAF3IP1, EZR, MAP1LC3A, CEP57, PLK1, KIF26A, DCX, KIF2A	696	86	6496	2.06202	0.203563	5.46891
	GOTERM_CC_DIRECT	GO:0071011~precatalytic spliceosome	6	0.787402	0.00453281	AGGF1, SNRNP40, SNRNP70, SNRNP35, PRPF38A, SF3B2	687	12	6774	4.93013	0.131369	6.32594
	GOTERM_BP_DIRECT	GO:0008543~fibroblast growth factor receptor signaling pathway	12	1.5748	0.00463121	FGF6, FGF8, CEP57, HNRNPF, TIA1, GTF2F1, FGF17, FGF16, SHOC2, FGF10, FGF12, FGF4	655	45	6398	2.60478	0.353049	7.87384
	GOTERM_CC_DIRECT	GO:0015630~microtubule cytoskeleton	15	1.9685	0.00475565	ENKD1, GAS2L3, CKAP2, KIF2C, KIF3B, KIF3A, CEP57, PLK1, PSRC1, PRKCI, AURKA, CDK16, MARK4, MARK1, SPATA7	687	65	6774	2.27545	0.129845	6.62711
	GOTERM_BP_DIRECT	GO:0008360~regulation of cell shape	17	2.23097	0.00480617	CSNK1A1, FMNL1, DMTN, CSNK1G1, CSNK1G2, BAIAP2, ERMN, KIT, S100A13, EZR, CSNK1D, CSNK1E, FYN, CSNK1G3, WIPF1, CDC42EP3, RASA1	655	78	6398	2.12891	0.353276	8.15952
	GOTERM_MF_DIRECT	GO:0005524~ATP binding	105	13.7795	0.00489573	KIFC1, RPS6KB2, AURKA, RPS6KB1, KIFC3, BTK, CSNK2A2, CSNK2A1, DDX21, DHX32, MATK, TWF1, CSNK1G1, CSNK1G2, LIG3, PIM1, CDKL3, MARK3, MARK4, MARK1, MARK2, PNKP, SCYL2, SMARCA5, CSNK1G3, KIF26A, NMNAT1, NEK7, MAPKAPK5, MAPKAPK3, STK17B, BMPR2, OAS1, CHEK1, RIOK1, CAMKV, DDX47, DDX49, DYRK3, DHX58, DDX43, DDX42, TEC, DHX8, KIF3B, KIF3A, MAP2K3, AK7, AK6, DDX6, DDX58, NOLC1, PLK1, DYRK1A, GRK6, GRK4, …	696	768	6496	1.27604	0.238747	7.0895
	GOTERM_CC_DIRECT	GO:0019013~viral nucleocapsid	7	0.918635	0.00490965	SNRPA1, HNRNPK, HNRNPF, SNRPB2, LARP1B, SNRNP70, HNRNPC	687	17	6774	4.06011	0.126827	6.83472
	GOTERM_MF_DIRECT	GO:0003684~damaged DNA binding	10	1.31234	0.00506941	PNKP, HMGB2, POLI, UNG, NEIL1, APTX, APEX1, KDM4D, FEN1, ERCC1	696	32	6496	2.91667	0.229535	7.33217
	GOTERM_MF_DIRECT	GO:0003735~structural constituent of ribosome	22	2.88714	0.00514228	RPL14, MRPS11, RPL26, RPS15A, RPL36, RPL23A, MRPS6, RPS27L, RPL38, RPL29, RPL30, RPS19, RPS28, MRPL28, RPL22, RPL31, RPL39L, RPL26L1, FAU, RPS10, RPL11, RSL24D1	696	109	6496	1.88379	0.217785	7.43381
	GOTERM_BP_DIRECT	GO:0045944~positive regulation of transcription from RNA polymerase II promoter	53	6.95538	0.00516465	HMGN3, PPARG, FGF10, GDNF, CITED1, BATF, BARX1, HSF1, WWP2, CREB3L2, IL1B, SERTAD1, FGF4, LDB2, GRHL3, CDK7, FOSB, HMGA1, OSM, SPDEF, TFAP2B, KPNA6, TFAP2D, HMGB2, CNBP, FOXM1, TFEB, BMPR2, FHL5, LIF, HNRNPK, AGO1, ARMCX3, TCEA2, YES1, ETV5, PIK3R1, CKAP2, SUB1, ASXL1, SMYD3, AHI1, KAT5, FOXP1, DDX58, RPS6KA3, CSRNP3, GSK3B, NELFA, RIT2, RBPJ, NELFE, SETD3	655	358	6398	1.44609	0.36382	8.74223
	GOTERM_CC_DIRECT	GO:0035145~exon-exon junction complex	5	0.656168	0.00522933	SRSF1, UPF3A, RBM8A, SAP18, PYM1	687	8	6774	6.16266	0.127917	7.26431
	GOTERM_BP_DIRECT	GO:0008283~cell proliferation	31	4.06824	0.00538839	FGF6, CDC14A, GNAI2, MCM10, PDAP1, CITED1, LARP1, ISG20, KIF2C, MCM7, RASGRP4, PAK4, RAPGEF3, ERCC1, GNL3, MATK, PTPN6, CDK1, BYSL, PAK1IP1, PIM1, RPL23A, CDK7, CDC25A, OSM, SERPINF1, PPP1R8, PLK1, TCF19, ALKBH3, PES1	655	182	6398	1.66377	0.366306	9.10415
	GOTERM_BP_DIRECT	GO:0006351~transcription, DNA-templated	78	10.2362	0.00572121	TAF1B, ZKSCAN8, E2F6, PPARG, TCEAL2, CITED1, BTK, CSNK2A2, CSNK2A1, HSF1, EED, PQBP1, SERTAD1, ARGLU1, ZNF280A, ZNF280B, MCRS1, KHDRBS2, BEND6, TFPT, BEND5, SF1, HMG20A, FOXN3, ZNF239, SPDEF, EDF1, TFAP2D, SGF29, TGIF2, SUDS3, IRAK1BP1, ZNF808, MEAF6, ING3, CNBP, HMGB2, TADA3, FOXM1, NFKBIB, TGIF2LX, TFEB, CTNND1, HEXIM2, ZSCAN26, CHD2, AGO1, TCEA1, THAP1, TCEA2, BAZ2B, TCF25, APEX1, MLLT3, NKRF,…	655	572	6398	1.33199	0.37426	9.64004
	GOTERM_MF_DIRECT	GO:0050321~tau-protein kinase activity	6	0.787402	0.00575796	CSNK1D, GSK3A, GSK3B, MARK4, MARK1, MARK2	696	12	6496	4.66667	0.226459	8.28841
	GOTERM_MF_DIRECT	GO:0004518~nuclease activity	6	0.787402	0.00575796	FANCM, APEX2, DFFB, EME1, ASTE1, FEN1	696	12	6496	4.66667	0.226459	8.28841
	GOTERM_MF_DIRECT	GO:0003906~DNA-(apurinic or apyrimidinic site) lyase activity	5	0.656168	0.00638879	APEX2, NEIL1, ALKBH1, APEX1, HMGA1	696	8	6496	5.83333	0.23447	9.15643
	GOTERM_BP_DIRECT	GO:0006607~NLS-bearing protein import into nucleus	6	0.787402	0.00703227	CBLB, KPNA6, KPNA3, NUP35, KPNA2, KPNA1	655	13	6398	4.50828	0.427999	11.7221
	GOTERM_BP_DIRECT	GO:0006355~regulation of transcription, DNA-templated	61	8.00525	0.00705339	TAF1B, ZKSCAN8, PTTG2, CITED1, CSNK2A2, PAK6, GTF2E2, CSNK2A1, PQBP1, NUP35, TBPL1, ARGLU1, CHTOP, MCRS1, KHDRBS2, TFPT, SF1, HMG20A, HMGA1, SARNP, ZNF691, ZNF239, TFAP2B, EDF1, SGF29, TGIF2, IRAK1BP1, ZNF808, MEAF6, ING3, HMGB2, CNBP, SRSF10, TGIF2LX, TFEB, CTNND1, DMD, ZSCAN26, CHD2, BTF3, THAP1, BAZ2B, MLLT6, APEX1, MLLT3, EFEMP1, ASXL1, PHF11, IGF2, RCAN1, KAT5, GAS7, MSL3, PPIE, ZSCAN31, PPP…	655	431	6398	1.38247	0.419183	11.7553
	GOTERM_MF_DIRECT	GO:0003743~translation initiation factor activity	9	1.1811	0.00731289	EIF2S1, EIF1AY, EIF5, EIF2S2, AGO1, EIF2A, EIF1, DENR, MTIF3	696	28	6496	3	0.250222	10.4141
	GOTERM_MF_DIRECT	GO:0004386~helicase activity	9	1.1811	0.00731289	DDX58, FANCM, DDX47, CHD2, SMARCA5, DHX58, DHX32, DDX42, DDX6	696	28	6496	3	0.250222	10.4141
	GOTERM_BP_DIRECT	GO:0051781~positive regulation of cell division	8	1.04987	0.00826884	OSM, FGF6, FGF8, PDGFB, IL1B, IGF2, MDK, FGF4	655	24	6398	3.25598	0.461296	13.6443
	GOTERM_BP_DIRECT	GO:0071277~cellular response to calcium ion	8	1.04987	0.00826884	DMTN, SYT1, ALOX5AP, RASGRP2, CPNE2, ASPH, FOSB, CARF	655	24	6398	3.25598	0.461296	13.6443
	GOTERM_BP_DIRECT	GO:0051301~cell division	29	3.80577	0.00834914	KIFC1, CDC14A, GNAI2, CETN3, AURKA, LATS1, CCNE2, KIF2C, CDC40, USP39, SKA3, KIF2A, CSNK1A1, CDK1, SPOUT1, ZC3HC1, PDS5A, PSRC1, LIG3, CDK6, CDC20, CDK7, REEP3, MARK4, CDC25A, FSD1, SYCP3, SMC1A, UBE2S	655	172	6398	1.64692	0.454894	13.7678
	GOTERM_BP_DIRECT	GO:0006417~regulation of translation	9	1.1811	0.0086997	ZNF706, SARNP, LARP6, RBM8A, MAPKAPK5, MKNK1, EIF2A, RPL38, DDX6	655	30	6398	2.93038	0.45925	14.3048
	GOTERM_BP_DIRECT	GO:0006310~DNA recombination	9	1.1811	0.0086997	EXO1, MCRS1, APEX2, RPAIN, TFPT, LIG3, RBPJ, APEX1, ERCC1	655	30	6398	2.93038	0.45925	14.3048
	GOTERM_MF_DIRECT	GO:0004674~protein serine/threonine kinase activity	44	5.77428	0.00927404	MAPKAPK5, MAPKAPK3, STK17B, MKNK1, RPS6KB2, AURKA, CHEK1, RIOK1, LATS1, PAK6, CSNK2A2, CSNK2A1, STK40, PAK4, DYRK3, CDK16, DCLK1, CSNK1A1, SRPK3, CDK1, SRPK2, CSNK1G1, CSNK1G2, LIMK1, MAP2K3, PIM1, PRKCI, CDK7, MARK3, MARK4, MARK1, SRPK1, MARK2, GAK, RPS6KA3, CSNK1D, CSNK1E, GSK3A, PLK1, GSK3B, DYRK1A, TSSK2, CSNK1G3, NEK7	696	281	6496	1.46145	0.291963	13.0296
	GOTERM_MF_DIRECT	GO:0046934~phosphatidylinositol-4,5-bisphosphate 3-kinase activity	11	1.44357	0.00950611	FGF6, FGF8, PDGFB, FYN, FGF17, LCK, FGF16, FGF10, KIT, PIK3R1, FGF4	696	41	6496	2.50407	0.284884	13.3343

## Sheet: Protein Domains
	Category	Term	Count	%	P-Value	Genes	List Total	Pop Hits	Pop Total	Fold Enrichment	Benjamini	FDR (%)		Protein Domain enrichment analysis
	Interpro	IPR012677:Nucleotide-binding, alpha-beta plait	42	5.51181	5.25795e-16	SRSF1, RBM33, SRSF10, CPEB4, TRMT2A, SNRPB2, ZCRB1, RBM8A, HNRNPF, TIA1, RBMS3, DDX21, HNRNPC, SNRNP70, PTBP2, SNRNP35, NUP35, RBM42, RBM23, RBM41, SREK1, G3BP1, RPL23A, RCAN1, SRSF3, UPF3A, PPIE, LARP6, SRSF5, LARP4, SRSF6, ABT1, LARP7, SRSF9, SRSF8, PSPC1, SNRPA, CIRBP, RNPC3, NELFE, RBM15, RBM17	708	99	6829	4.09202	5.85088e-13	8.88178e-13		Enriched protein domains from a DAVID analysis using the ProtoArray hits as a foreground and all proteins assayed on the ProtoArray as a specific background.
	Interpro	IPR000504:RNA recognition motif domain	34	4.46194	3.29301e-12	SRSF1, RBM33, SRSF10, TRMT2A, CPEB4, SNRPB2, ZCRB1, RBM8A, TIA1, HNRNPF, RBMS3, HNRNPC, SNRNP70, PTBP2, SNRNP35, RBM42, RBM23, RBM41, SREK1, G3BP1, SRSF3, PPIE, SRSF5, SRSF6, LARP7, SRSF9, SRSF8, PSPC1, SNRPA, CIRBP, RNPC3, NELFE, RBM15, RBM17	708	85	6829	3.85819	1.73543e-09	5.23777e-09
	Interpro	IPR002209:Heparin-binding growth factor/Fibroblast growth factor	8	1.04987	6.15049e-05	FGF6, FGF8, FGF17, FGF16, FGF10, FGF13, FGF12, FGF4	708	12	6829	6.43032	0.0213776	0.0977824
	Interpro	IPR008271:Serine/threonine-protein kinase, active site	46	6.03675	6.51702e-05	MAPKAPK5, MAPKAPK3, STK17B, MKNK1, RPS6KB2, RPS6KB1, AURKA, CHEK1, LATS1, CSNK2A2, CSNK2A1, STK40, DYRK3, CDK16, DCLK1, CSNK1A1, SRPK3, CDK1, SRPK2, CSNK1G1, CSNK1G2, MAP2K3, PRKCI, PIM1, CDK6, CDK7, MARK3, CDKL3, MARK4, MARK1, SRPK1, MARK2, GAK, RPS6KA3, CSNK1D, CSNK1E, GSK3A, PLK1, GSK3B, DYRK1A, GRK6, TSSK2, GRK4, CSNK1G3, GRK2, NEK7	708	243	6829	1.82589	0.0170263	0.103607
	Interpro	IPR014001:Helicase, Superfamily 1/2, ATP-binding domain	14	1.83727	0.00011904	DHX8, DDX6, DDX58, FANCM, DDX47, DDX49, CHD2, SMARCA5, DDX21, DDX54, DHX32, DHX58, DDX43, DDX42	708	40	6829	3.37592	0.0247829	0.189173
	Interpro	IPR008996:Cytokine, IL-1-like	10	1.31234	0.000121071	FGF6, FGF8, ADARB1, FGF17, FGF16, IL1B, FGF10, FGF13, FGF12, FGF4	708	21	6829	4.59309	0.0210448	0.192397
	Interpro	IPR017441:Protein kinase, ATP binding site	54	7.08661	0.000226494	RPS6KB2, AURKA, RPS6KB1, BTK, PAK6, CSNK2A2, CSNK2A1, PAK4, CDK16, MATK, SRPK3, SRPK2, CDK1, CSNK1G1, CSNK1G2, LIMK1, PRKCI, PIM1, CDK6, CDK7, MARK3, CDKL3, MARK4, MARK1, SRPK1, MARK2, LCK, CSNK1G3, NEK7, STK17B, BMPR2, MAPKAPK3, MKNK1, CHEK1, KIT, DYRK3, YES1, DCLK1, TEC, CSNK1A1, FLT3, MAP2K3, RPS6KA3, CSNK1D, CSNK1E, PLK1, GSK3A, FYN, GSK3B, DYRK1A, GRK6, GRK4, TSSK2, GRK2	708	316	6829	1.64828	0.0335322	0.359644
	Interpro	IPR001452:Src homology-3 domain	24	3.14961	0.00026893	OSTF1, MPP3, BAIAP2, SLA2, MPP5, AHI1, NOSTRIN, MPP7, GAS7, BTK, ARHGAP12, CTTN, SH3GLB2, FYN, PLCG2, LCK, STAM, SH3D19, YES1, RASA1, PIK3R1, TEC, NPHP1, MATK	708	103	6829	2.24749	0.0348158	0.426894
	Interpro	IPR000253:Forkhead-associated (FHA) domain	7	0.918635	0.000352664	PNKP, MCRS1, AGGF1, PPP1R8, APTX, TCF19, SLC4A1AP	708	11	6829	6.13803	0.0404666	0.559461
	Interpro	IPR001650:Helicase, C-terminal	13	1.70604	0.000385792	DHX8, DDX6, DDX58, FANCM, DDX47, DDX49, CHD2, SMARCA5, DDX21, DDX54, DHX58, DDX43, DDX42	708	39	6829	3.21516	0.0398544	0.611865
	Interpro	IPR006630:RNA-binding protein Lupus La	5	0.656168	0.000523072	LARP6, LARP4, LARP7, LARP1B, LARP1	708	5	6829	9.64548	0.048897	0.828741
	Interpro	IPR000719:Protein kinase, catalytic domain	61	8.00525	0.000542216	RPS6KB2, AURKA, RPS6KB1, LATS1, BTK, PAK6, CSNK2A2, CSNK2A1, PAK4, CDK16, MATK, SRPK3, CDK1, SRPK2, CSNK1G1, CSNK1G2, LIMK1, PRKCI, PIM1, CDK6, CDK7, MARK3, CDKL3, MARK4, MARK1, SRPK1, GAK, MARK2, SCYL2, LCK, CSNK1G3, NEK7, MAPKAPK5, MAPKAPK3, STK17B, BMPR2, MKNK1, CHEK1, KIT, CAMKV, STK40, MAP3K3, DYRK3, YES1, DCLK1, TEC, CSNK1A1, FLT3, MAP2K3, RPS6KA3, CSNK1D, CSNK1E, FYN, PLK1, GSK3A, GSK3B, D…	708	382	6829	1.54025	0.0465207	0.85895
	Interpro	IPR011009:Protein kinase-like domain	62	8.13648	0.00134094	RPS6KB2, AURKA, RPS6KB1, LATS1, BTK, PAK6, CSNK2A2, CSNK2A1, PAK4, CDK16, MATK, SRPK3, CDK1, SRPK2, CSNK1G1, CSNK1G2, LIMK1, PRKCI, PIM1, CDK6, CDK7, MARK3, CDKL3, MARK4, MARK1, SRPK1, GAK, MARK2, SCYL2, LCK, CSNK1G3, NEK7, MAPKAPK5, MAPKAPK3, STK17B, BMPR2, MKNK1, CHEK1, KIT, RIOK1, CAMKV, STK40, MAP3K3, DYRK3, YES1, DCLK1, TEC, CSNK1A1, FLT3, MAP2K3, RPS6KA3, CSNK1D, CSNK1E, FYN, PLK1, GSK3A, G…	708	404	6829	1.48025	0.103084	2.11167
	Interpro	IPR011991:Winged helix-turn-helix DNA-binding domain	19	2.49344	0.00229269	METAP2, DDRGK1, E2F6, RFX5, FOXM1, LARP1B, FOXN3, FOXP1, LARP1, LARP6, GTF2E2, RPS19, LARP4, HSF1, LARP7, GTF2F1, SPDEF, RAPGEF3, ETV5	708	85	6829	2.15605	0.158699	3.58502
	Interpro	IPR001752:Kinesin, motor domain	7	0.918635	0.00265554	KIFC1, KIF2C, KIF3B, KIF3A, KIF26A, KIFC3, KIF2A	708	15	6829	4.50122	0.170427	4.14122
	Interpro	IPR000008:C2 calcium-dependent membrane targeting	15	1.9685	0.00315267	SYT1, ABR, SYT3, SYT6, PCLO, GAK, WWP2, RGS3, PLCG2, WWC3, SYTL2, ITCH, CPNE2, RASA3, RASA1	708	61	6829	2.37184	0.187801	4.8984
	Interpro	IPR014014:RNA helicase, DEAD-box type, Q motif	7	0.918635	0.00751454	DDX47, DDX49, DDX21, DDX54, DDX43, DDX42, DDX6	708	18	6829	3.75102	0.373534	11.3057
	Interpro	IPR001565:Synaptotagmin	5	0.656168	0.00937583	SYT1, SYT3, SYT6, SYTL2, PCLO	708	9	6829	5.3586	0.423971	13.9147
	Interpro	IPR010994:RuvA domain 2-like	4	0.524934	0.00941466	FANCM, FAAP24, EEPD1, ERCC1	708	5	6829	7.71638	0.408291	13.9684
	Interpro	IPR001772:Kinase associated domain 1 (KA1)	4	0.524934	0.00941466	MARK3, MARK4, MARK1, MARK2	708	5	6829	7.71638	0.408291	13.9684
	Pfam	PF00076:RNA recognition motif (a.k.a. RRM, RBD, or RNP domain)	32	4.19948	3.14018e-11	SRSF1, RBM33, SRSF10, SNRPB2, ZCRB1, RBM8A, TIA1, HNRNPF, RBMS3, PTBP2, SNRNP70, SNRNP35, HNRNPC, RBM42, RBM23, RBM41, SREK1, G3BP1, SRSF3, PPIE, SRSF5, SRSF6, LARP7, SRSF9, SRSF8, PSPC1, SNRPA, CIRBP, RNPC3, NELFE, RBM15, RBM17	677	82	6546	3.77332	1.92179e-08	4.65037e-08
	Pfam	PF00069:Protein kinase domain	52	6.82415	3.426e-05	RPS6KB2, AURKA, RPS6KB1, LATS1, PAK6, CSNK2A2, CSNK2A1, PAK4, CDK16, SRPK3, SRPK2, CDK1, CSNK1G1, CSNK1G2, PRKCI, PIM1, CDK6, CDK7, MARK3, CDKL3, MARK4, MARK1, SRPK1, MARK2, GAK, SCYL2, CSNK1G3, NEK7, MAPKAPK5, STK17B, BMPR2, MAPKAPK3, MKNK1, CHEK1, CAMKV, STK40, MAP3K3, DYRK3, DCLK1, CSNK1A1, MAP2K3, RPS6KA3, CSNK1D, CSNK1E, PLK1, GSK3A, GSK3B, DYRK1A, GRK6, TSSK2, GRK4, GRK2	677	281	6546	1.7893	0.010429	0.0507245
	Pfam	PF00167:Fibroblast growth factor	8	1.04987	6.04436e-05	FGF6, FGF8, FGF17, FGF16, FGF10, FGF13, FGF12, FGF4	677	12	6546	6.44609	0.0122552	0.0894752
	Pfam	PF00271:Helicase conserved C-terminal domain	13	1.70604	0.000286883	DHX8, DDX6, DDX58, FANCM, DDX47, DDX49, CHD2, SMARCA5, DDX21, DDX54, DHX58, DDX43, DDX42	677	38	6546	3.30786	0.0429497	0.424012
	Pfam	PF00498:FHA domain	6	0.787402	0.000496762	MCRS1, AGGF1, PPP1R8, APTX, TCF19, SLC4A1AP	677	8	6546	7.25185	0.0590063	0.73315
	Pfam	PF05383:La domain	5	0.656168	0.000517784	LARP6, LARP4, LARP7, LARP1B, LARP1	677	5	6546	9.66913	0.0514565	0.764065
	Pfam	PF00018:SH3 domain	15	1.9685	0.00128859	OSTF1, SLA2, AHI1, BTK, CTTN, FYN, PLCG2, LCK, STAM, SH3D19, YES1, RASA1, TEC, MATK, NPHP1	677	56	6546	2.58995	0.106611	1.89143
	Pfam	PF00168:C2 domain	13	1.70604	0.00190315	SYT1, ABR, SYT3, SYT6, PCLO, WWP2, RGS3, PLCG2, SYTL2, ITCH, CPNE2, RASA3, RASA1	677	46	6546	2.73258	0.135609	2.78169
	Pfam	PF00225:Kinesin motor domain	7	0.918635	0.00261983	KIFC1, KIF2C, KIF3B, KIF3A, KIF26A, KIFC3, KIF2A	677	15	6546	4.51226	0.163377	3.81037
	Pfam	PF02149:Kinase associated domain 1	4	0.524934	0.00934647	MARK3, MARK4, MARK1, MARK2	677	5	6546	7.7353	0.437123	12.9829
	Supfam	SSF54928:RNA-binding domain, RBD	41	5.38058	6.6043e-16	SRSF1, RBM33, SRSF10, CPEB4, TRMT2A, SNRPB2, ZCRB1, RBM8A, HNRNPF, TIA1, RBMS3, DDX21, HNRNPC, SNRNP70, PTBP2, SNRNP35, NUP35, RBM42, RBM23, RBM41, SREK1, G3BP1, RCAN1, SRSF3, UPF3A, PPIE, LARP6, SRSF5, LARP4, SRSF6, ABT1, LARP7, SRSF9, SRSF8, PSPC1, SNRPA, CIRBP, RNPC3, NELFE, RBM15, RBM17	484	96	4660	4.112	1.19904e-13	8.21565e-13
	Supfam	SSF50353:Cytokine	10	1.31234	0.000120301	FGF6, FGF8, ADARB1, FGF17, FGF16, IL1B, FGF10, FGF13, FGF12, FGF4	484	21	4660	4.58481	0.0107693	0.14808
	Supfam	SSF50044:SH3-domain	24	3.14961	0.000221686	OSTF1, MPP3, BAIAP2, SLA2, MPP5, AHI1, NOSTRIN, MPP7, GAS7, BTK, ARHGAP12, CTTN, SH3GLB2, FYN, PLCG2, LCK, STAM, SH3D19, YES1, RASA1, PIK3R1, TEC, NPHP1, MATK	484	102	4660	2.26544	0.0132146	0.272719
	Supfam	SSF56112:Protein kinase-like (PK-like)	62	8.13648	0.00119356	RPS6KB2, AURKA, RPS6KB1, LATS1, BTK, PAK6, CSNK2A2, CSNK2A1, PAK4, CDK16, MATK, SRPK3, CDK1, SRPK2, CSNK1G1, CSNK1G2, LIMK1, PRKCI, PIM1, CDK6, CDK7, MARK3, CDKL3, MARK4, MARK1, SRPK1, GAK, MARK2, SCYL2, LCK, CSNK1G3, NEK7, MAPKAPK5, MAPKAPK3, STK17B, BMPR2, MKNK1, CHEK1, KIT, RIOK1, CAMKV, STK40, MAP3K3, DYRK3, YES1, DCLK1, TEC, CSNK1A1, FLT3, MAP2K3, RPS6KA3, CSNK1D, CSNK1E, FYN, PLK1, GSK3A, G…	484	404	4660	1.47758	0.0523237	1.46028
	Supfam	SSF46785:"Winged helix" DNA-binding domain	19	2.49344	0.00146607	METAP2, DDRGK1, E2F6, RFX5, FOXM1, LARP1B, FOXN3, FOXP1, LARP1, LARP6, GTF2E2, RPS19, LARP4, HSF1, LARP7, GTF2F1, SPDEF, RAPGEF3, ETV5	484	82	4660	2.2309	0.0514466	1.79092
	Supfam	SSF49562:C2 domain (Calcium/lipid-binding domain, CaLB)	15	1.9685	0.00264881	SYT1, ABR, SYT3, SYT6, PCLO, GAK, WWP2, RGS3, PLCG2, WWC3, SYTL2, ITCH, CPNE2, RASA3, RASA1	484	60	4660	2.40702	0.0764865	3.21421
	Supfam	SSF88723:PIN domain-like	5	0.656168	0.00567722	EXO1, UTP23, FCF1, ASTE1, FEN1	484	8	4660	6.01756	0.136189	6.77259
	Supfam	SSF51045:WW domain	7	0.918635	0.00751741	WWP2, DMD, WWC3, PQBP1, ITCH, GAS7, ARHGAP12	484	18	4660	3.74426	0.15615	8.87567
	Supfam	SSF47781:RuvA domain 2-like	4	0.524934	0.00943141	FANCM, FAAP24, EEPD1, ERCC1	484	5	4660	7.70248	0.172647	11.0168
