# Supplementary material for: DEAD box RNA helicases are pervasive protein kinase interactors and activators
Source: HighWire-hosted journal article supplement (doi:10.1101/gr.278264.123), 2024-06-01
Supplement: Supplemental_Table_S9_.xlsx [file Supplemental_Table_S9_.xlsx]

## Sheet: Description
	Kinome-wide protein kinase activity screens were conducted with and without recombinant DDX3X, -39A, DDX50, and -56

## Sheet: Screen DDX3X
	Kinase Assay Name	General Kinase Substrate	Kinase Uniprot ID	Kinase Official Symbol	Data 1	Data 2	Mean Kinase Activity (%)	Log2 Fold Change		Kinase Profiling Screen with DDX3X
	CK1epsilon	CK1tide	P49674	CSNK1E	422.017	413.348	417.682	2.06241		DDX3X was tested in single dose duplicate mode at a concentration of 100 nM. Reactions were carried out at 50 μM ATP. CK1epsilon was assayed 4 times. Data represent % kinase activity relative to buffer controls.
	CK1epsilon	CK1tide	P49674	CSNK1E	362.001	328.241	345.121	1.7871
	CK1epsilon	CK1tide	P49674	CSNK1E	279.698	341.2	310.449	1.63436
	CK1epsilon	CK1tide	P49674	CSNK1E	271.472	305.037	288.255	1.52734
	CAMK2b	Autocamtide 2 + Ca-CaM	Q13554	CAMK2B	264.141	260.859	262.5	1.39232
	CDK1/cyclin B	Histone H1	P06493	CDK1	215.838	218.372	217.105	1.11839
	DYRK2	DYRKtide	Q92630	DYRK2	210.347	210.834	210.59	1.07444
	CK1d	CK1tide	P48730	CSNK1D	199.097	194.665	196.881	0.977324
	CK2a2	CK2 sub	P19784	CSNK2A2	191.023	192.854	191.938	0.940643
	BRSK1	CHKtide	Q8TDC3	BRSK1	191.002	188.844	189.923	0.925415
	c-MET	MBP	P08581	MET	174.1	190.512	182.306	0.86636
	ULK1	MBP	O75385	ULK1	162.123	162.183	162.153	0.697359
	DYRK4	DYRKtide	Q9NR20	DYRK4	158.753	158.27	158.512	0.664588
	TNIK	LRRKtide	Q9UKE5	TNIK	157.695	151.333	154.514	0.627736
	ULK2	MBP	Q8IYT8	ULK2	148.713	152.473	150.593	0.590655
	DAPK1	ZIPtide	P53355	DAPK1	169.102	127.364	148.233	0.567868
	PDK1/PDHK1	MBP	Q15118	PDK1	155.03	138.831	146.93	0.555132
	NEK6	MBP	Q9HC98	NEK6	141.811	144.336	143.074	0.51676
	SRPK1	RS peptide	Q96SB4	SRPK1	140.425	137.152	138.789	0.472891
	CDK1/cyclin A	Histone H1	P06493	CDK1	141.088	132.321	136.705	0.451064
	FLT1/VEGFR1	pEY + Mn	P17948	FLT1	136.176	129.509	132.843	0.40972
	MARK3	CHKtide	P27448	MARK3	132.676	131.565	132.12	0.401853
	DYRK1B	DYRKtide	Q9Y463	DYRK1B	132.763	130.162	131.462	0.394648
	BMX/ETK	pEY	P51813	BMX	132.014	129.424	130.719	0.386469
	SRPK2	RS peptide	P78362	SRPK2	129.543	131.441	130.492	0.383959
	CDK2/cyclin A	Histone H1	P24941	CDK2	131.426	128.274	129.85	0.376846
	DYRK3	DYRKtide	O43781	DYRK3	129.399	129.916	129.657	0.374701
	TIE2/TEK	pEY + Mn	Q02763	TEK	126.631	131.484	129.057	0.36801
	PAK6	ZIPtide	Q9NQU5	PAK6	139.389	114.711	127.05	0.345395
	RON/MST1R	Axltide + Mn	Q04912	MST1R	127.168	126.663	126.916	0.343871
	ERK1/MAPK3	MBP	P27361	MAPK3	128.007	125.22	126.613	0.340431
	PDK3/PDHK3	MBP	Q15120	PDK3	129.575	119.964	124.77	0.319268
	ERBB4/HER4	pEY + Mn	Q15303	ERBB4	127.819	119.901	123.86	0.308711
	CAMK2a	Autocamtide 2 + Ca-CaM	Q9UQM7	CAMK2A	123.661	121.721	122.691	0.295028
	EGFR	pEY + Mn	P00533	EGFR	123.715	120.363	122.039	0.287339
	SRMS	pEY + Mn	Q9H3Y6	SRMS	121.527	122.518	122.022	0.287144
	STK22D/TSSK1	CHKtide	Q9BXA7	TSSK1B	122.483	120.969	121.726	0.283638
	IR	pEY + Mn	P06213	INSR	122.378	120.222	121.3	0.278582
	CAMK4	ZIPtide + Ca-CaM*	Q16566	CAMK4	120.537	121.751	121.144	0.276721
	MARK1	CHKtide	Q9P0L2	MARK1	121.472	119.886	120.679	0.271175
	CAMK2d	ZIPtide + Ca-CaM*	Q13557	CAMK2D	125.841	115.496	120.668	0.271044
	MARK2/PAR-1Ba	CHKtide	Q7KZI7	MARK2	122.488	118.843	120.665	0.271011
	PDK2/PDHK2	MBP	Q15119	PDK2	138.913	98.5541	118.733	0.247725
	EPHA3	pEY + Mn	P29320	EPHA3	117.737	119.343	118.54	0.24537
	CDK3/cyclin E	Histone H1	Q00526	CDK3	118.287	118.68	118.483	0.244684
	PKCg	Histone H1 + Lipid Activator	P05129	PRKCG	118.105	118.759	118.432	0.244055
	MUSK	MBP	O15146	MUSK	114.112	119.258	116.685	0.222618
	CHK2	CHKtide	O96017	CHEK2	113.418	117.849	115.633	0.209556
	LCK2/ICK	MBP + Mn	Q9UPZ9	CILK1	113.019	117.889	115.454	0.207319
	PDK1/PDPK1	PDKtide	O15530	PDPK1	116.583	113.804	115.194	0.20406
	CAMK1d	Autocamtide 2 + Ca-CaM	Q8IU85	CAMK1D	110.689	118.958	114.824	0.199419
	PKN3/PRK3	SGKtide	Q6P5Z2	PKN3	110.495	118.362	114.428	0.194442
	MARK4	CHKtide	Q96L34	MARK4	118.289	110.201	114.245	0.192129
	PYK2	pEY + Mn	Q14289	PTK2B	110.082	118.277	114.18	0.191305
	PKCtheta	Histone H1 + Lipid Activator	Q04759	PRKCQ	111.803	116.437	114.12	0.190553
	MEKK1	MBP	Q13233	MAP3K1	116.881	111.13	114.006	0.189107
	ERBB2/HER2	pEY + Mn	P04626	ERBB2	115.309	112.023	113.666	0.184805
	FLT4/VEGFR3	pEY + Mn	P35916	FLT4	109.695	116.246	112.971	0.175946
	P38a/MAPK14	MBP	Q16539	MAPK14	114.925	110.619	112.772	0.173408
	CDK5/p25	Histone H1	Q00535	CDK5	113.539	111.804	112.671	0.172123
	PBK/TOPK	MBP	Q96KB5	PBK	112.005	112.684	112.345	0.16793
	CTK/MATK	pEY	P42679	MATK	111.811	112.626	112.219	0.166313
	PKN2/PRK2	Glycogen Synthase-derived peptide	Q16513	PKN2	108.485	115.714	112.1	0.164782
	MAPKAPK2	Glycogen Synthase-derived peptide	P49137	MAPKAPK2	111.355	112.169	111.762	0.160432
	EPHA4	pEY + Mn	P54764	EPHA4	112.826	108.382	110.604	0.145407
	DNA-PK	DNA-PKtide+ dsDNA	P78527	PRKDC	106.461	114.188	110.325	0.141757
	KDR/VEGFR2	pEY + Mn	P35968	KDR	104.797	115.481	110.139	0.139325
	ARK5/NUAK1	CHKtide	O60285	NUAK1	111.454	108.087	109.77	0.13449
	STK38/NDR1	Modified PKA Substrate	Q15208	STK38	106.697	112.646	109.671	0.133185
	EIF2AK3/PERK	MBP	Q9NZJ5	EIF2AK3	112.692	106.564	109.628	0.132618
	P38b/MAPK11	MBP	Q15759	MAPK11	106.56	112.456	109.508	0.131033
	SGK3/SGKL	Crosstide	Q96BR1	SGK3	108.92	110.082	109.501	0.130946
	Aurora C	Kemptide	Q9UQB9	AURKC	107.445	111.539	109.492	0.130821
	TRKB	pEY + Mn	Q16620	NTRK2	108.822	109.888	109.355	0.129021
	CK2a	CK2 sub	P68400	CSNK2A1	115.036	103.464	109.25	0.127631
	TBK1	CK1tide	Q9UHD2	TBK1	110.687	107.528	109.108	0.125752
	HCK	Src Substrate peptide	P08631	HCK	104.217	113.738	108.978	0.124031
	CHK1	CHKtide	O14757	CHEK1	108.31	109.339	108.825	0.122006
	PKCeta	PKCe Pep + Lipid Activator	P24723	PRKCH	106.49	110.363	108.427	0.116719
	PKAcg	Long S6 Kinase substrate peptide	P22612	PRKACG	104.343	111.768	108.056	0.111773
	PKCzeta	PKCepsilon Peptide	Q05513	PRKCZ	109.487	106.529	108.008	0.111136
	LYN	pEY	P07948	LYN	105.287	110.138	107.712	0.107183
	ROCK2	Long S6 Kinase substrate peptide	O75116	ROCK2	108.092	106.362	107.227	0.100664
	AMPK(A2/B1/G1)	SAMStide + 125 uM AMP	P54646/Q9Y478/P54619	PRKAA2	108.523	105.867	107.195	0.100239
	DAPK2	ZIPtide + Ca-CaM	Q9UIK4	DAPK2	109.848	103.379	106.613	0.0923893
	ROS/ROS1	IGF-1Rtide	P08922	ROS1	105.498	107.611	106.555	0.0915944
	FGFR1	pEY + Mn	P11362	FGFR1	107.384	105.556	106.47	0.0904498
	ERK2/MAPK1	MBP	P28482	MAPK1	107.404	105.422	106.413	0.089674
	EPHA2	pEY	P29317	EPHA2	107.843	104.91	106.377	0.0891834
	DCAMKL1	Autocamtide 2 + Ca-CaM	O15075	DCLK1	109.614	103.116	106.365	0.089023
	WEE1	MBP	P30291	WEE1	102.691	110.011	106.351	0.0888359
	FGFR3	pEY + Mn	P22607	FGFR3	105.297	106.787	106.042	0.0846308
	TRKC	pEY	Q16288	NTRK3	106.221	105.634	105.928	0.0830794
	GSK3a	Phospho-Glycogen Synthase peptide	P49840	GSK3A	109.945	101.877	105.911	0.0828536
	NEK9	MBP	Q8TD19	NEK9	107.082	104.545	105.814	0.0815258
	EPHB3	pEY	P54753	EPHB3	102.553	108.889	105.721	0.0802622
	PKCd	PKCe Pep + Lipid Activator	Q05655	PRKCD	112.349	98.8646	105.607	0.0786995
	EPHA8	pEY	P29322	EPHA8	105.973	105.014	105.493	0.0771539
	HIPK1	MBP	Q86Z02	HIPK1	102.849	107.916	105.383	0.0756372
	MAPKAPK5/PRAK	Glycogen Synthase-derived peptide	Q8IW41	MAPKAPK5	107.296	103.035	105.166	0.072666
	CDC7/DBF4	PDKtide	O00311	CDC7	107.646	102.654	105.15	0.0724505
	MRCKa/CDC42BPA	Long S6 Kinase substrate peptide	Q5VT25	CDC42BPA	98.6171	111.225	104.921	0.0693072
	JNK1	ATF2	P45983	MAPK8	106.985	102.565	104.775	0.0672931
	EPHB2	pEY + Mn	P29323	EPHB2	103.802	105.262	104.532	0.0639384
	SNARK/NUAK2	MBP	Q9H093	NUAK2	107.966	100.821	104.394	0.0620353
	ITK	MBP	Q08881	ITK	99.8443	108.921	104.382	0.061879
	HIPK4	MBP	Q8NE63	HIPK4	109.343	99.396	104.369	0.0617
	PDGFRa	pEY + Mn	Q9DE49	PDGFRA	97.4332	111.033	104.233	0.0598146
	PKCepsilon	S25 PKC Peptide	Q02156	PRKCE	102.596	105.688	104.142	0.0585517
	CAMK1g	Autocamtide 2 + Ca-CaM	Q96NX5	CAMK1G	100.758	107.407	104.083	0.0577284
	MKK4	JNK(K55M)	P45985	MAP2K4	101.895	106.026	103.961	0.0560373
	CLK2	MBP	P49760	CLK2	105.202	102.698	103.95	0.0558863
	DYRK1/DYRK1A	DYRKtide	Q13627	DYRK1A	103.508	104.339	103.924	0.0555239
	JNK3	ATF2	P53779	MAPK10	107.217	100.426	103.822	0.0541069
	LATS2	SGKtide	Q9NRM7	LATS2	101.129	106.397	103.763	0.0532893
	MEK1	ERK(K52R)	Q02750	MAP2K1	101.274	106.131	103.703	0.0524544
	PDK4/PDHK4	MBP	Q16654	PDK4	108.661	98.4154	103.538	0.05016
	PKCb1	Histone H1 + Lipid Activator	P05771	PRKCB	103.02	104.037	103.528	0.0500278
	FLT3	Abltide	P36888	FLT3	100.261	106.145	103.203	0.0454891
	PKCiota	PKCepsilon Peptide	P41743	PRKCI	101.89	104.463	103.176	0.0451085
	TYRO3/SKY	pEY + Mn	Q06418	TYRO3	106.342	99.8507	103.097	0.0439958
	ALK2/ACVR1	Casein + Mn	Q04771	ACVR1	94.1833	111.947	103.065	0.0435602
	AMPK(A1/B1/G3)	SAMStide + 125 uM AMP	Q13131/Q9Y478/Q9UGI9	PRKAA1	102.776	102.829	102.802	0.0398751
	AMPK(A1/B1/G1)	SAMStide + 125 uM AMP	Q13131/Q9Y478/P54619	PRKAA1	103.779	101.631	102.705	0.0385074
	GSK3b	Phospho-Glycogen Synthase peptide	P49841	GSK3B	99.6776	105.332	102.505	0.0356921
	CAMK2g	ZIPtide + Ca-CaM*	Q13555	CAMK2G	99.9152	104.849	102.382	0.0339668
	IGF1R	pEY + Mn	P08069	IGF1R	101.8	102.866	102.333	0.033274
	mTOR/FRAP1	4EBP1 + Mn	P42345	MTOR	101.913	102.6	102.256	0.0321894
	AMPK(A1/B1/G2)	SAMStide + 125 uM AMP	Q13131/Q9Y478/Q9UGJ0	PRKAA1	113.126	90.9368	102.031	0.0290106
	PKCa	Histone H1 + Lipid Activator	P17252	PRKCA	102.01	101.978	101.994	0.0284882
	RIPK5	MBP	Q6XUX3	DSTYK	104.389	99.4668	101.928	0.0275522
	PAK3	ZIPtide	O75914	PAK3	106.009	97.8195	101.914	0.0273543
	PAK5	ZIPtide	Q9P286	PAK5	101.998	101.643	101.82	0.0260268
	MSK1/RPS6KA5	Crosstide	O75582	RPS6KA5	99.7333	103.744	101.739	0.0248695
	FGFR2	pEY + Mn	P21802	FGFR2	94.9776	107.857	101.417	0.0203048
	MYLK3	ZIPtide + Ca-CaM	Q32MK0	MYLK3	100.668	102.03	101.349	0.0193337
	MKK6	p38a (K53A)	P52564	MAP2K6	106.426	95.8791	101.153	0.0165354
	SYK	pEY	P43405	SYK	101.131	100.604	100.868	0.0124637
	P38d/MAPK13	MBP	O15264	MAPK13	100.413	100.746	100.579	0.00833019
	MAPKAPK3	Glycogen Synthase-derived peptide	Q16644	MAPKAPK3	99.4589	101.619	100.539	0.00775619
	TYK2	Axltide	P29597	TYK2	100.306	100.731	100.518	0.00745611
	CLK3	MBP	P49761	CLK3	99.9853	101.042	100.514	0.00739366
	HGK/MAP4K4	MBP	O95819	MAP4K4	102.631	98.2857	100.458	0.00659695
	P38g/MAPK12	MBP	P53778	MAPK12	99.7491	101.105	100.427	0.00614798
	TXK	Abltide	P42681	TXK	96.4463	104.294	100.37	0.00533226
	MRCKb/CDC42BPB	Long S6 Kinase substrate peptide	Q9Y5S2	CDC42BPB	104.443	96.2345	100.339	0.00487629
	CDK2/cyclin E	Histone H1	P24941	CDK2	99.484	100.909	100.197	0.00283506
	SIK3	AMARA peptide	Q9Y2K2	SIK3	104.001	96.2262	100.114	0.0016414
	FGFR4	pEY + Mn	P22455	FGFR4	89.3156	110.748	100.032	0.000455314
	SIK1	AMARA peptide	P57059	SIK1	100.99	98.9805	99.9851	-0.000215461
	TRPM7/CHAK1	MBP + Mn	Q96QT4	TRPM7	102.222	97.6857	99.954	-0.000664072
	ABL2/ARG	Abltide	P42684	ABL2	102.855	97.0243	99.9397	-0.000869984
	CDK7/cyclin H	Histone H1	P50613	CDK7	101.485	98.3102	99.8976	-0.00147869
	MEK2	ERK(K52R)	P36507	MAP2K2	97.7198	102.019	99.8692	-0.0018887
	LIMK1	Cofilin 1	P53667	LIMK1	95.8159	103.808	99.812	-0.00271542
	JAK3	JAK3tide	P52333	JAK3	98.0817	101.42	99.7511	-0.00359604
	HIPK3	MBP	Q9H422	HIPK3	99.745	99.6965	99.7208	-0.00403426
	EIF2AK4/GCN2	RS peptide	Q9P2K8	EIF2AK4	98.5668	100.834	99.7002	-0.00433221
	PKAcb	Long S6 Kinase substrate peptide	P22694	PRKACB	97.0802	102.242	99.6609	-0.00490094
	HPK1/MAP4K1	MBP	Q92918	MAP4K1	105.165	94.1329	99.6488	-0.00507546
	AMPK(A1/B2/G1)	SAMStide + 125 uM AMP	Q13131/O43741/P54619	PRKAA1	102.491	96.758	99.6244	-0.00542868
	BMPR2	MBP	Q13873	BMPR2	100.538	98.4517	99.4946	-0.00730933
	GCK/MAP4K2	MBP	Q12851	MAP4K2	97.2285	101.398	99.3134	-0.00994026
	DRAK1/STK17A	ZIPtide	Q9UEE5	STK17A	93.3144	105.212	99.2633	-0.010667
	PIM3	Pim2tide	Q86V86	PIM3	100.37	98.1533	99.2618	-0.0106901
	AMPK(A2/B2/G1)	SAMStide + 125 uM AMP	P54646/O43741/P54619	PRKAA2	101.388	96.8432	99.1156	-0.0128165
	EIF2AK2	RS peptide	P19525	EIF2AK2	98.9565	99.0218	98.9891	-0.0146584
	AMPK(A2/B2/G2)	SAMStide + 125 uM AMP	P54646/O43741/Q9UGJ0	PRKAA2	98.7206	99.0091	98.8649	-0.0164699
	JNK2	ATF2	P45984	MAPK9	102.52	95.145	98.8324	-0.0169435
	CDK5/p35	Histone H1	Q00535	CDK5	100.01	97.6351	98.8224	-0.0170903
	STK38L/NDR2	SGKtide	Q9Y2H1	STK38L	100.309	97.3051	98.8069	-0.0173163
	CAMK1a	Autocamtide 2 + Ca-CaM	Q14012	CAMK1	98.9728	98.42	98.6964	-0.0189307
	CDK2/cyclin A1	Histone H1	P24941	CDK2	97.0326	100.032	98.5321	-0.0213348
	MELK	ZIPtide	Q14680	MELK	98.9178	98.1006	98.5092	-0.0216693
	CDK4/cyclin D1	RB-CTF	P11802	CDK4	95.2762	101.541	98.4086	-0.0231441
	PKCb2	Histone H1 + Lipid Activator	P05771	PRKCB	104.975	91.7977	98.3862	-0.0234722
	TEC	pEY + Mn	P42680	TEC	102.061	94.5455	98.303	-0.0246924
	AXL	Abltide + Mn	P30530	AXL	91.0637	105.442	98.2528	-0.0254294
	FGR	pEY	P09769	FGR	99.4297	97.0668	98.2482	-0.0254968
	TSSK2	CHKtide	Q96PF2	TSSK2	94.8266	101.528	98.1774	-0.0265378
	DMPK2/CDC42BPG	DAPK1tide	Q6DT37	CDC42BPG	96.9304	99.3743	98.1524	-0.0269051
	EPHA5	pEY + Mn	P54756	EPHA5	97.6085	98.5174	98.0629	-0.0282202
	VRK1	Casein	Q99986	VRK1	105.549	90.499	98.0241	-0.0287916
	ROCK1	Long S6 Kinase substrate peptide	Q13464	ROCK1	97.7334	98.2001	97.9667	-0.029636
	p70S6Kb/RPS6KB2	S6K/Rsk2 peptide 2	Q9UBS0	RPS6KB2	97.8804	97.846	97.8632	-0.0311622
	ACK1	Abltide	Q07912	TNK2	100.302	95.3224	97.8123	-0.0319128
	SIK2	AMARA peptide	Q9H0K1	SIK2	98.182	97.4298	97.8059	-0.0320067
	WNK1	MBP	Q9H4A3	WNK1	95.5001	100.104	97.8018	-0.032067
	BRSK2	ZIPtide	Q8IWQ3	BRSK2	97.1975	98.2685	97.733	-0.0330817
	GRK5	Casein	P34947	GRK5	93.5707	101.887	97.729	-0.0331416
	CK1g1	CK1tide	Q9HCP0	CSNK1G1	95.8883	99.5065	97.6974	-0.0336079
	PIM2	Pim2tide	Q9P1W9	PIM2	95.8224	99.5119	97.6672	-0.0340546
	TESK1	Cofilin 2 + Mn	Q15569	TESK1	95.6286	99.6267	97.6276	-0.0346385
	FAK/PTK2	pEY	Q05397	PTK2	102.123	92.8221	97.4726	-0.036931
	PKA	PKA sub	P17612	PRKACA	93.0525	101.65	97.3513	-0.0387278
	CDK4/cyclin D3	RB-CTF	P11802	CDK4	93.0313	101.536	97.2839	-0.0397275
	GRK3	Casein	P35626	GRK3	99.0954	95.241	97.1682	-0.0414442
	JAK2	pEY	O60674	JAK2	94.8691	99.4029	97.136	-0.0419219
	TNK1	pEY	Q13470	TNK1	96.9585	97.2726	97.1155	-0.042226
	DCAMKL2	Autocamtide 2 + Ca-CaM	Q8N568	DCLK2	95.8613	98.3121	97.0867	-0.0426543
	PHKg2	ZIPtide	P15735	PHKG2	99.1243	94.7495	96.9369	-0.0448825
	CSK	pEY	P41240	CSK	97.2466	96.5596	96.9031	-0.0453855
	c-Kit	pEY + Mn	P10721	KIT	97.8397	95.6089	96.7243	-0.0480498
	PLK4/SAK	Casein	O00444	PLK4	99.1352	93.9455	96.5404	-0.050796
	ALK5/TGFBR1	Casein + Mn	P36897	TGFBR1	96.4297	96.5355	96.4826	-0.0516591
	EPHA1	pEY + Mn	P21709	EPHA1	96.054	96.9035	96.4787	-0.051717
	STK32B/YANK2	MBP + Mn	Q9NY57	STK32B	98.1842	94.6277	96.4059	-0.052806
	MINK/MINK1	MBP	Q8N4C8	MINK1	96.7958	95.9578	96.3768	-0.053242
	PAK1	Long S6 Kinase substrate peptide	Q13153	PAK1	96.3086	96.3429	96.3258	-0.0540065
	CK1g3	CK1tide	Q9Y6M4	CSNK1G3	94.954	97.3217	96.1379	-0.0568231
	PLK3	Casein	Q9H4B4	PLK3	95.9967	96.1227	96.0597	-0.0579966
	ZAP70	pEY	P43403	ZAP70	94.6351	97.4189	96.027	-0.058488
	LRRK2	LRRKtide	Q5S007	LRRK2	94.3815	97.6165	95.999	-0.0589088
	CDK9/cyclin T1	PDKtide	P50750	CDK9	98.0007	93.9471	95.9739	-0.059286
	LIMK2	Cofilin 2 + Mn	P53671	LIMK2	93.7505	98.1058	95.9282	-0.0599737
	FYN	pEY	P06241	FYN	97.7945	93.8589	95.8267	-0.0614999
	PHKg1	ZIPtide	Q16816	PHKG1	95.4652	95.7798	95.6225	-0.0645781
	MLCK2/MYLK2	ZIPtide + Ca-CaM	Q9H1R3	MYLK2	95.1088	96.0328	95.5708	-0.0653582
	CLK4	MBP	Q9HAZ1	CLK4	91.5574	99.4239	95.4907	-0.0665683
	LATS1	SGKtide	O95835	LATS1	96.068	93.9533	95.0106	-0.0738389
	FER	pEY	P16591	FER	92.2403	97.7254	94.9828	-0.0742613
	PDGFRb	pEY + Mn	P09619	PDGFRB	91.9649	97.9934	94.9792	-0.0743167
	RET	CHKtide	P07949	RET	95.1332	94.6763	94.9047	-0.075448
	CK1a1	CK1tide	P48729	CSNK1A1	99.1807	90.4837	94.8322	-0.0765511
	BRAF	MEK1 (K97R)	P15056	BRAF	100.222	89.0739	94.6478	-0.0793596
	JAK1	pEY	P23458	JAK1	93.1292	96.1289	94.6291	-0.0796449
	EEF2K	EEF2Ktide+Ca-CaM	O00418	EEF2K	94.826	94.3761	94.6011	-0.0800714
	YES/YES1	pEY	P07947	YES1	102.835	86.2193	94.5271	-0.0812007
	FMS	pEY + Mn	P07333	CSF1R	93.5779	94.9656	94.2717	-0.0851028
	DDR2	Axltide + Mn	Q16832	DDR2	92.3265	96.1965	94.2615	-0.0852588
	SLK/STK2	Histone H3	Q9H2G2	SLK	96.418	92.0891	94.2535	-0.0853814
	DDR1	IRS1tide	Q08345	DDR1	95.2785	92.7149	93.9967	-0.0893179
	Haspin	Histone H3	Q8TF76	HASPIN	96.3572	91.1961	93.7766	-0.0926996
	CDK6/cyclin D1	RB-CTF	Q00534	CDK6	94.9347	92.4281	93.6814	-0.0941656
	GRK7	Casein	Q8WTQ7	GRK7	86.709	100.365	93.5368	-0.0963939
	PRKX	Kemptide	P51817	PRKX	92.5564	94.0403	93.2984	-0.100076
	CDK1/cyclin E	RB Protein	P06493	CDK1	86.2422	100.28	93.2613	-0.10065
	HIPK2	MBP	Q9H2X6	HIPK2	92.5634	93.897	93.2302	-0.10113
	MST4	MBP	Q9P289	STK26	94.8216	91.3418	93.0817	-0.10343
	EIF2AK1/HRI	MBP	Q9BQI3	EIF2AK1	92.1277	93.9115	93.0196	-0.104394
	CAMKK2	MBP + Ca-CaM	Q96RR4	CAMKK2	92.3558	92.8012	92.5785	-0.111251
	ERK7/MAPK15	MBP	Q8TD08	MAPK15	93.6306	91.1938	92.4122	-0.113844
	EPHA7	pEY	Q15375	EPHA7	92.9262	91.5339	92.23	-0.116692
	CDK9/cyclin K	PDKtide	P50750	CDK9	93.1842	91.1646	92.1744	-0.117562
	ARAF	MEK1 (K97R)	P10398	ARAF	92.5559	91.6688	92.1123	-0.118534
	CDK16/cyclin Y (PCTAIRE)	RB Protein	Q00536	CDK16	88.6279	95.4562	92.0421	-0.119635
	IKKe/IKBKE	Casein	Q14164	IKBKE	94.6058	89.2801	91.943	-0.121189
	EPHB1	pEY	P54762	EPHB1	91.6254	92.0861	91.8558	-0.122558
	MLCK/MYLK	ZIPtide + Ca-CaM	Q15746	MYLK	92.2125	91.3594	91.7859	-0.123655
	MST2/STK3	MBP	Q13188	STK3	85.3399	97.4431	91.3915	-0.129868
	PAK4	MBP	O96013	PAK4	94.0747	88.7023	91.3885	-0.129916
	IRR/INSRR	Axltide	P14616	INSRR	97.2349	85.2853	91.2601	-0.131944
	MLK3/MAP3K11	MBP	Q16584	MAP3K11	91.657	90.6717	91.1643	-0.133458
	TLK1	Histone H3	Q9UKI8	TLK1	90.0937	91.6029	90.8483	-0.138469
	ALK3/BMPR1A	Casein + Mn	P36894	BMPR1A	88.9513	92.693	90.8222	-0.138883
	PIM1	S6K/Rsk2 peptide 2	P11309	PIM1	86.0444	95.0194	90.5319	-0.143502
	TSSK3/STK22C	CHKtide	Q96PN8	TSSK3	87.2805	93.6797	90.4801	-0.144328
	PKG2/PRKG2	Kemptide	Q13237	PRKG2	87.3019	93.6493	90.4756	-0.144399
	AKT1	Crosstide	P31749	AKT1	94.9146	85.7877	90.3512	-0.146385
	ZIPK/DAPK3	ZIPtide	O43293	DAPK3	90.6914	89.9867	90.339	-0.146579
	ALK6/BMPR1B	Casein + Mn	O00238	BMPR1B	90.1488	90.4704	90.3096	-0.147049
	TAOK3/JIK	MBP	Q9H2K8	TAOK3	89.2672	90.4977	89.8824	-0.153889
	FRK/PTK5	pEY + Mn	P42685	FRK	87.3273	92.1723	89.7498	-0.156019
	PKD2/PRKD2	Glycogen Synthase-derived peptide	Q9BZL6	PRKD2	91.0532	88.1824	89.6178	-0.158143
	CLK1	MBP	P49759	CLK1	93.1798	85.9488	89.5643	-0.159004
	RSK3	Glycogen Synthase-derived peptide	Q15349	RPS6KA2	86.0929	92.5462	89.3195	-0.162952
	MSSK1/STK23	RS peptide	Q9UPE1	SRPK3	90.0515	88.3914	89.2214	-0.164538
	PLK1	Casein	P53350	PLK1	93.816	84.5692	89.1926	-0.165004
	STK33	MBP	Q9BYT3	STK33	88.2273	88.8834	88.5554	-0.175349
	RSK4	Long S6 Kinase substrate peptide	Q9UK32	RPS6KA6	87.0614	89.9299	88.4957	-0.176321
	LYN B	pEY+ Mn	P07948	LYN	90.0273	86.2234	88.1253	-0.182371
	STK16	MBP	O75716	STK16	84.9935	91.2026	88.098	-0.182818
	ALK4/ACVR1B	Casein + Mn	P36896	ACVR1B	85.3214	90.1783	87.7498	-0.188532
	TYK1/LTK	Abltide	P29376	LTK	83.2542	92.1569	87.7056	-0.189259
	AKT3	Crosstide	Q9Y243	AKT3	88.0466	87.0956	87.5711	-0.191473
	p70S6K/RPS6KB1	S6K/Rsk2 peptide 2	P23443	RPS6KB1	86.9559	88.0332	87.4946	-0.192735
	SGK1	Crosstide	O00141	SGK1	86.6837	87.3247	87.0042	-0.200843
	PAK2	Long S6 Kinase substrate peptide	Q13177	PAK2	86.1376	87.673	86.9053	-0.202484
	BLK	pEY	P51451	BLK	83.2792	90.069	86.6741	-0.206327
	GRK4	Casein	P32298	GRK4	88.2735	85.0586	86.666	-0.206462
	ALK	pEY	Q9UM73	ALK	84.6795	88.5805	86.63	-0.207062
	FES/FPS	pEY	P07332	FES	87.6143	85.4695	86.5419	-0.208529
	TGFBR2	MBP	P37173	TGFBR2	81.2173	91.2641	86.2407	-0.21356
	RSK1	Glycogen Synthase-derived peptide	Q15418	RPS6KA1	85.5509	86.8384	86.1947	-0.214329
	ABL1	Abltide	P00519	ABL1	85.2949	87.0057	86.1503	-0.215072
	EPHB4	pEY	P54760	EPHB4	88.7219	83.558	86.14	-0.215245
	ULK3	Casein	Q6PHR2	ULK3	87.2902	84.9225	86.1064	-0.215808
	NEK3	MBP	Q8WUN5	NEK3	90.969	80.9222	85.9456	-0.218504
	RAF1	MEK1 (K97R)	P04049	RAF1	88.9924	82.2681	85.6302	-0.223808
	MSK2/RPS6KA4	Crosstide	O75676	RPS6KA4	89.2705	81.9307	85.6006	-0.224307
	TTBK2	MBP	Q6IQ55	TTBK2	84.4267	85.911	85.1689	-0.231602
	PKCmu/PRKD1	Glycogen Synthase-derived peptide	Q15139	PRKD1	79.9563	89.5375	84.7469	-0.238767
	TAK1	Casein	O43318	MAP3K7	82.7401	86.1924	84.4663	-0.243553
	RIPK2	MBP	O43353	RIPK2	83.7807	83.1593	83.47	-0.26067
	GRK1	Casein	Q15835	GRK1	83.9525	82.7152	83.3338	-0.263026
	RIPK3	MBP	Q9Y572	RIPK3	80.8298	84.6482	82.739	-0.273361
	CAMK1b	Autocamtide 2 + Ca-CaM	Q6P2M8	PNCK	80.8053	84.4712	82.6382	-0.275118
	CK1g2	CK1tide	P78368	CSNK1G2	76.9415	87.5107	82.2261	-0.282331
	WNK3	MBP	Q9BYP7	WNK3	78.656	84.4603	81.5581	-0.294099
	COT1/MAP3K8	MEK1 (K97R)	P41279	MAP3K8	83.4842	79.4926	81.4884	-0.295334
	PLK2	Casein	Q9NYY3	PLK2	82.1506	79.6553	80.9029	-0.305736
	SGK2	Crosstide	Q9HBY8	SGK2	78.0227	83.132	80.5774	-0.311553
	PASK	ZIPtide	Q96RG2	PASK	80.2929	80.0035	80.1482	-0.319258
	SSTK/TSSK6	MBP	Q9BXA6	TSSK6	81.1927	79.0187	80.1057	-0.320023
	TTBK1	MBP	Q5TCY1	TTBK1	82.0471	78.0408	80.044	-0.321135
	ERK5/MAPK7	MBP	Q13164	MAPK7	76.9025	82.8754	79.8889	-0.323932
	DLK/MAP3K12	MBP	Q12852	MAP3K12	77.0399	82.6375	79.8387	-0.32484
	MLK1/MAP3K9	Casein	P80192	MAP3K9	78.5247	81.0314	79.778	-0.325936
	c-MER	pEY	Q12866	MERTK	75.6666	83.4803	79.5735	-0.32964
	ALK1/ACVRL1	Casein + Mn	P37023	ACVRL1	76.8281	80.7441	78.7861	-0.343987
	CDK6/cyclin D3	RB-CTF	Q00534	CDK6	77.8008	79.1236	78.4622	-0.34993
	MEK3	p38a (K53A)	P46734	MAP2K3	76.0708	79.6157	77.8432	-0.361356
	STK32C/YANK3	MBP + Mn	Q86UX6	STK32C	78.5794	77.03	77.8047	-0.362071
	BTK	pEY	Q06187	BTK	77.6709	77.854	77.7625	-0.362854
	IKKb/IKBKB	IKKtide	O14920	IKBKB	73.1025	82.0275	77.565	-0.366523
	Aurora B	Kemptide	Q96GD4	AURKB	79.4708	74.968	77.2194	-0.372964
	LCK	pEY + Mn	P06239	LCK	72.534	81.6917	77.1128	-0.374957
	BRK	pEY + Mn	Q13882	PTK6	76.176	76.3853	76.2807	-0.390611
	TLK2	Casein	Q86UE8	TLK2	75.179	74.1519	74.6655	-0.421487
	MST3/STK24	MBP	Q9Y6E0	STK24	70.3238	78.6422	74.483	-0.425017
	c-Src	pEY	P12931	SRC	75.3311	73.0147	74.1729	-0.431035
	GRK2	Casein	P25098	GRK2	73.5431	74.5109	74.027	-0.433877
	GRK6	Casein	P43250	GRK6	75.0336	70.2974	72.6655	-0.460657
	IRAK4	MBP	Q9NWZ3	IRAK4	75.0521	70.1201	72.5861	-0.462235
	NEK1	MBP	Q96PY6	NEK1	67.8741	74.1412	71.0076	-0.493954
	CAMKK1	MBP + Ca-CaM	Q8N5S9	CAMKK1	67.0857	74.8189	70.9523	-0.495078
	ZAK/MLTK	MBP	Q9NYL2	MAP3K20	64.0181	77.3575	70.6878	-0.500466
	PKCnu/PRKD3	Glycogen Synthase-derived peptide	O94806	PRKD3	69.7141	71.2899	70.502	-0.504264
	MNK2	MBP	Q9HBH9	MKNK2	68.0837	71.6703	69.877	-0.51711
	TRKA	pEY + Mn	P04629	NTRK1	71.9534	66.2514	69.1024	-0.533192
	OSR1/OXSR1	CATCHtide	O95747	OXSR1	74.6924	62.7883	68.7403	-0.540771
	NLK	MBP	Q9UBE8	NLK	68.8045	67.4707	68.1376	-0.553477
	NEK2	MBP	P51955	NEK2	62.593	73.2194	67.9062	-0.558385
	AKT2	Crosstide	P31751	AKT2	62.2093	72.161	67.1852	-0.573785
	KHS/MAP4K5	MBP	Q9Y4K4	MAP4K5	63.622	70.0326	66.8273	-0.581491
	RSK2	Glycogen Synthase-derived peptide	P51812	RPS6KA3	69.1382	64.114	66.6261	-0.58584
	NEK5	MBP	Q6P3R8	NEK5	65.8832	66.2751	66.0791	-0.597734
	IRAK1	MBP	P51617	IRAK1	66.0918	65.668	65.8799	-0.60209
	MLK2/MAP3K10	MBP	Q02779	MAP3K10	63.2149	65.69	64.4525	-0.633693
	NEK11	MBP	Q8NG66	NEK11	64.0492	64.6168	64.333	-0.636369
	MNK1	MBP	Q9BUB5	MKNK1	63.5357	65.0778	64.3067	-0.636958
	NEK7	MBP	Q8TDX7	NEK7	60.5174	67.5435	64.0305	-0.64317
	EPHA6	pEY	Q9UF33	EPHA6	61.4455	66.3053	63.8754	-0.646667
	IKKa/CHUK	IKKtide	O15111	CHUK	55.2788	71.7778	63.5283	-0.654528
	MYO3B	MBP	Q8WXR4	MYO3B	58.7975	67.2852	63.0414	-0.665629
	WNK2	MBP	Q9Y3S1	WNK2	58.966	60.2765	59.6213	-0.746101
	PKN1/PRK1	Glycogen Synthase-derived peptide	Q16512	PKN1	55.8139	56.8458	56.3299	-0.828028
	MEKK3	MBP	Q99759	MAP3K3	54.8188	56.3456	55.5822	-0.847305
	TAOK2	MBP	Q9UL54	TAOK2	53.0304	58.1227	55.5766	-0.847452
	DMPK	Axltide	Q09013	DMPK	52.7535	56.0155	54.3845	-0.878733
	PKG1b	Kemptide	P14619	PRKG1	56.5994	51.6437	54.1215	-0.885725
	STK25/YSK1	MBP	O00506	STK25	51.1856	56.5546	53.8701	-0.892442
	LKB1	LKB1tide	Q15831	STK11	54.2609	52.2546	53.2577	-0.908937
	STK39/STLK3	CATCHtide	Q9UEW8	STK39	52.3251	51.7038	52.0145	-0.943015
	VRK2	Casein + Mn	Q86Y07	VRK2	47.3974	51.7587	49.578	-1.01223
	GLK/MAP4K3	MBP	Q8IVH8	MAP4K3	50.5264	48.1984	49.3624	-1.01852
	TAOK1	MBP	Q7L7X3	TAOK1	49.0433	49.2893	49.1663	-1.02426
	MEKK2	MBP	Q9Y2U5	MAP3K2	48.6346	47.0727	47.8537	-1.0633
	LOK/STK10	Axltide	O94804	STK10	40.2025	44.9638	42.5831	-1.23165
	NEK4	MBP	P51957	NEK4	42.5944	42.1948	42.3946	-1.23805
	PKG1a	Kemptide	Q13976	PRKG1	38.7123	41.0457	39.879	-1.3263
	ASK1/MAP3K5	MBP	Q99683	MAP3K5	37.3579	39.7567	38.5573	-1.37492
	Aurora A	Kemptide	O14965	AURKA	37.4414	39.0288	38.2351	-1.38703
	MST1/STK4	Axltide	Q13043	STK4	32.2894	30.1079	31.1986	-1.68044

## Sheet: Screen DDX39A
	Kinase Assay Name	General Kinase Substrate	Kinase Uniprot ID	Kinase Official Symbol	Data 1	Data 2	Mean Kinase Activity (%)	Log2 Fold Change		Kinase Profiling Screen with DDX39A
	CK1d	CK1tide	P48730	CSNK1D	334.659	319.171	326.915	1.70892		DDX39A was tested in single dose duplicate mode at a concentration of 120 nM. Reactions were carried out at 50 μM ATP. CK1a1 was assayed 3 times and CK1epsilon was assayed 2 times. Data represent % kinase activity relative to buffer controls.
	BRSK1	CHKtide	Q8TDC3	BRSK1	316.008	315.745	315.876	1.65936
	RSK4	Long S6 Kinase substrate peptide	Q9UK32	RPS6KA6	322.379	301.377	311.878	1.64098
	CK2a2	CK2 sub	P19784	CSNK2A2	287.896	273.187	280.542	1.48821
	CK1epsilon	CK1tide	P49674	CSNK1E	277.038	276.881	276.96	1.46968
	CK1epsilon	CK1tide	P49674	CSNK1E	276.714	268.227	272.47	1.4461
	SIK2	AMARA peptide	Q9H0K1	SIK2	197.912	196.441	197.176	0.979487
	PKG1a	Kemptide	Q13976	PRKG1	187.546	184.278	185.912	0.894619
	PKCiota	PKCepsilon Peptide	P41743	PRKCI	175.535	165.708	170.621	0.770796
	PKN2/PRK2	Glycogen Synthase-derived peptide	Q16513	PKN2	184.995	156.097	170.546	0.770162
	CK1a1	CK1tide	P48729	CSNK1A1	168.746	165.909	167.327	0.742674
	CK1a1	CK1tide	P48729	CSNK1A1	170.311	164.315	167.313	0.742547
	CAMKK2	MBP + Ca-CaM	Q96RR4	CAMKK2	171.371	157.734	164.553	0.718548
	PKD2/PRKD2	Glycogen Synthase-derived peptide	Q9BZL6	PRKD2	167.767	154.414	161.091	0.687872
	ULK2	MBP	Q8IYT8	ULK2	154.474	152.92	153.697	0.62009
	CK1a1	CK1tide	P48729	CSNK1A1	150.594	148.78	149.687	0.581947
	NEK5	MBP	Q6P3R8	NEK5	148.782	145.866	147.324	0.558994
	MARK2/PAR-1Ba	CHKtide	Q7KZI7	MARK2	147.672	145.401	146.536	0.551259
	TESK1	Cofilin 2 + Mn	Q15569	TESK1	143.284	142.494	142.889	0.514897
	c-MET	MBP	P08581	MET	140.629	137.611	139.12	0.476328
	PLK4/SAK	Casein	O00444	PLK4	138.846	133.213	136.029	0.443919
	TTBK2	MBP	Q6IQ55	TTBK2	134.142	134.012	134.077	0.423062
	DCAMKL1	Autocamtide 2 + Ca-CaM	O15075	DCLK1	135.107	132.361	133.734	0.419366
	ERK7/MAPK15	MBP	Q8TD08	MAPK15	134.553	130.234	132.394	0.404835
	CK2a	CK2 sub	P68400	CSNK2A1	133.989	130.746	132.368	0.404549
	PKN3/PRK3	SGKtide	Q6P5Z2	PKN3	134.64	128.748	131.694	0.397192
	EPHB1	pEY	P54762	EPHB1	131.518	131.253	131.385	0.393804
	TAOK3/JIK	MBP	Q9H2K8	TAOK3	141.51	118.791	130.15	0.38018
	MARK1	CHKtide	Q9P0L2	MARK1	129.743	129.73	129.737	0.375586
	PAK6	ZIPtide	Q9NQU5	PAK6	137.834	121.447	129.641	0.374521
	SRPK1	RS peptide	Q96SB4	SRPK1	135.89	121.86	128.875	0.36597
	DYRK2	DYRKtide	Q92630	DYRK2	133.558	122.987	128.272	0.359208
	STK25/YSK1	MBP	O00506	STK25	126.75	126.448	126.599	0.340265
	PKCd	PKCe Pep + Lipid Activator	Q05655	PRKCD	126.696	123.843	125.269	0.325032
	CK1g3	CK1tide	Q9Y6M4	CSNK1G3	125.459	123.525	124.492	0.316052
	MARK3	CHKtide	P27448	MARK3	124.65	122.618	123.634	0.306076
	FGFR4	pEY + Mn	P22455	FGFR4	124.722	120.945	122.833	0.296699
	STK32B/YANK2	MBP + Mn	Q9NY57	STK32B	123.825	120.793	122.309	0.290528
	HGK/MAP4K4	MBP	O95819	MAP4K4	121.776	121.359	121.567	0.281758
	P38a/MAPK14	MBP	Q16539	MAPK14	121.964	120.693	121.328	0.278917
	NEK9	MBP	Q8TD19	NEK9	121.392	120.286	120.839	0.273084
	PBK/TOPK	MBP	Q96KB5	PBK	119.463	119.202	119.332	0.254986
	CHK1	CHKtide	O14757	CHEK1	119.535	118.096	118.815	0.248723
	IRAK1	MBP	P51617	IRAK1	118.778	117.085	117.932	0.237949
	STK22D/TSSK1	CHKtide	Q9BXA7	TSSK1B	117.374	116.347	116.861	0.224789
	CDK9/cyclin T1	PDKtide	P50750	CDK9	119.562	113.246	116.404	0.219139
	SRPK2	RS peptide	P78362	SRPK2	118.615	113.913	116.264	0.217402
	CDK2/cyclin O	Histone H1	P24941	CDK2	124.599	105.358	114.978	0.201361
	TYRO3/SKY	pEY + Mn	Q06418	TYRO3	115.701	112.698	114.199	0.191555
	VRK2	Casein + Mn	Q86Y07	VRK2	114.382	113.789	114.086	0.190117
	SLK/STK2	Histone H3	Q9H2G2	SLK	113.355	113.153	113.254	0.179559
	ERK5/MAPK7	MBP	Q13164	MAPK7	113.595	112.798	113.196	0.178824
	DYRK3	DYRKtide	O43781	DYRK3	113.179	112.89	113.035	0.176763
	BMX/ETK	pEY	P51813	BMX	113.708	111.865	112.787	0.173595
	MEK3	p38a (K53A)	P46734	MAP2K3	113.365	111.719	112.542	0.170464
	RSK3	Glycogen Synthase-derived peptide	Q15349	RPS6KA2	113.931	110.595	112.263	0.16688
	NEK3	MBP	Q8WUN5	NEK3	112.251	112.022	112.136	0.165254
	PKAcg	Long S6 Kinase substrate peptide	P22612	PRKACG	112.505	111.547	112.026	0.163836
	SGK1	Crosstide	O00141	SGK1	112.169	111.78	111.974	0.16317
	HPK1/MAP4K1	MBP	Q92918	MAP4K1	114.95	108.995	111.973	0.163146
	SIK3	AMARA peptide	Q9Y2K2	SIK3	112.032	111.823	111.927	0.162564
	PKCepsilon	S25 PKC Peptide	Q02156	PRKCE	114.49	108.902	111.696	0.159582
	ITK	MBP	Q08881	ITK	113.527	109.185	111.356	0.155179
	AMPK(A1/B1/G3)	SAMStide + 125 uM AMP	Q13131/Q9Y478/Q9UGI9	PRKAA1	112.176	110.455	111.315	0.154653
	NEK6	MBP	Q9HC98	NEK6	114.094	108.299	111.196	0.153105
	CDK2/cyclin A1	Histone H1	P24941	CDK2	113.461	107.821	110.641	0.145889
	IRAK4	MBP	Q9NWZ3	IRAK4	110.883	110.367	110.625	0.145675
	EPHA5	pEY + Mn	P54756	EPHA5	111.399	109.395	110.397	0.142699
	PKG2/PRKG2	Kemptide	Q13237	PRKG2	112.363	108.146	110.255	0.140838
	HIPK4	MBP	Q8NE63	HIPK4	111.167	109.172	110.17	0.139726
	WNK3	MBP	Q9BYP7	WNK3	112.424	107.913	110.168	0.139708
	CAMK2d	ZIPtide + Ca-CaM*	Q13557	CAMK2D	111.38	108.92	110.15	0.139467
	PDK3/PDHK3	MBP	Q15120	PDK3	112.427	107.795	110.111	0.138959
	CLK3	MBP	P49761	CLK3	110.236	109.914	110.075	0.138485
	P38b/MAPK11	MBP	Q15759	MAPK11	111.015	109.013	110.014	0.137681
	MYLK3	ZIPtide + Ca-CaM	Q32MK0	MYLK3	109.6	109.258	109.429	0.129996
	MST3/STK24	MBP	Q9Y6E0	STK24	109.334	108.924	109.129	0.126038
	EIF2AK2	RS peptide	P19525	EIF2AK2	109.361	108.721	109.041	0.12487
	DAPK1	ZIPtide	P53355	DAPK1	109.054	108.685	108.869	0.122598
	ARK5/NUAK1	CHKtide	O60285	NUAK1	109.072	108.348	108.71	0.12049
	MRCKa/CDC42BPA	Long S6 Kinase substrate peptide	Q5VT25	CDC42BPA	108.476	108.473	108.474	0.117355
	SSTK/TSSK6	MBP	Q9BXA6	TSSK6	110.019	105.814	107.916	0.109913
	TSSK2	CHKtide	Q96PF2	TSSK2	108.747	106.844	107.795	0.108297
	c-MER	pEY	Q12866	MERTK	112.434	103.082	107.758	0.107798
	MST2/STK3	MBP	Q13188	STK3	108.817	106.689	107.753	0.107727
	CAMK2b	Autocamtide 2 + Ca-CaM	Q13554	CAMK2B	108.508	106.934	107.721	0.107303
	PKAcb	Long S6 Kinase substrate peptide	P22694	PRKACB	107.72	107.472	107.596	0.105626
	MARK4	CHKtide	Q96L34	MARK4	107.958	106.966	107.462	0.10383
	MKK7	JNK (K55M)	O14733	MAP2K7	108.085	106.775	107.43	0.103397
	CDK3/cyclin E	Histone H1	Q00526	CDK3	108.217	106.575	107.396	0.102936
	MEKK1	MBP	Q13233	MAP3K1	107.859	106.68	107.269	0.101238
	LYN	pEY	P07948	LYN	108.022	106.489	107.256	0.101056
	ERK2/MAPK1	MBP	P28482	MAPK1	107.389	106.814	107.102	0.0989824
	CLK4	MBP	Q9HAZ1	CLK4	110.581	103.337	106.959	0.0970599
	ROCK2	Long S6 Kinase substrate peptide	O75116	ROCK2	108.703	105.181	106.942	0.0968277
	EPHA4	pEY + Mn	P54764	EPHA4	106.934	106.91	106.922	0.0965614
	LOK/STK10	Axltide	O94804	STK10	108.637	105.067	106.852	0.0956176
	DAPK2	ZIPtide + Ca-CaM	Q9UIK4	DAPK2	107.226	106.307	106.766	0.0944566
	MEK1	ERK(K52R)	Q02750	MAP2K1	107.629	105.619	106.624	0.0925284
	RIPK5	MBP	Q6XUX3	DSTYK	106.923	106.287	106.605	0.092269
	ABL1	Abltide	P00519	ABL1	107.237	105.957	106.597	0.0921649
	ALK2/ACVR1	Casein + Mn	Q04771	ACVR1	107.668	105.496	106.582	0.0919637
	CK1g2	CK1tide	P78368	CSNK1G2	108.208	104.921	106.565	0.0917279
	LYN B	pEY+ Mn	P07948	LYN	107.204	105.766	106.485	0.0906527
	EGFR	pEY + Mn	P00533	EGFR	106.6	106.276	106.438	0.0900155
	MELK	ZIPtide	Q14680	MELK	106.083	105.905	105.994	0.0839863
	EIF2AK4/GCN2	RS peptide	Q9P2K8	EIF2AK4	108.004	103.958	105.981	0.083806
	CLK2	MBP	P49760	CLK2	105.992	105.826	105.909	0.0828266
	PKG1b	Kemptide	P14619	PRKG1	107.284	104.474	105.879	0.0824168
	TRKA	pEY + Mn	P04629	NTRK1	106.198	105.55	105.874	0.0823475
	DNA-PK	DNA-PKtide+ dsDNA	P78527	PRKDC	108.585	102.985	105.785	0.0811338
	WEE1	MBP	P30291	WEE1	111.288	100.027	105.658	0.0793976
	LIMK1	Cofilin 1	P53667	LIMK1	105.641	105.596	105.618	0.0788623
	TSSK3/STK22C	CHKtide	Q96PN8	TSSK3	105.639	105.368	105.503	0.0772897
	ULK1	MBP	O75385	ULK1	105.383	105.38	105.382	0.0756218
	ZAK/MLTK	MBP	Q9NYL2	MAP3K20	105.771	104.986	105.379	0.0755807
	CAMK1b	Autocamtide 2 + Ca-CaM	Q6P2M8	PNCK	105.369	105.163	105.266	0.0740399
	NEK1	MBP	Q96PY6	NEK1	105.566	104.68	105.123	0.072076
	MUSK	MBP	O15146	MUSK	106.95	103.093	105.021	0.0706847
	CLK1	MBP	P49759	CLK1	106.24	103.748	104.994	0.0703088
	PKCg	Histone H1 + Lipid Activator	P05129	PRKCG	106.905	103.073	104.989	0.0702434
	PKCzeta	PKCepsilon Peptide	Q05513	PRKCZ	104.954	104.842	104.898	0.0689859
	MEK2	ERK(K52R)	P36507	MAP2K2	104.774	104.681	104.727	0.0666357
	GSK3b	Phospho-Glycogen Synthase peptide	P49841	GSK3B	104.888	104.392	104.64	0.0654366
	TBK1	CK1tide	Q9UHD2	TBK1	105.804	103.443	104.623	0.0652035
	DLK/MAP3K12	MBP	Q12852	MAP3K12	104.974	103.804	104.389	0.061963
	FLT4/VEGFR3	pEY + Mn	P35916	FLT4	104.604	103.84	104.222	0.0596588
	DDR2	Axltide + Mn	Q16832	DDR2	106.123	102.287	104.205	0.0594278
	PDGFRa	pEY + Mn	Q9DE49	PDGFRA	104.845	103.477	104.161	0.0588174
	LATS2	SGKtide	Q9NRM7	LATS2	105.367	102.756	104.062	0.057438
	AKT2	Crosstide	P31751	AKT2	105.327	102.795	104.061	0.0574269
	PDK1/PDHK1	MBP	Q15118	PDK1	104.716	103.256	103.986	0.0563873
	AMPK(A1/B1/G2)	SAMStide + 125 uM AMP	Q13131/Q9Y478/Q9UGJ0	PRKAA1	105.573	102.278	103.926	0.0555503
	MAPKAPK2	Glycogen Synthase-derived peptide	P49137	MAPKAPK2	104.677	102.92	103.798	0.0537808
	P38g/MAPK12	MBP	P53778	MAPK12	104.178	102.934	103.556	0.0504083
	PIM1	S6K/Rsk2 peptide 2	P11309	PIM1	103.803	103.064	103.434	0.0487074
	DRAK1/STK17A	ZIPtide	Q9UEE5	STK17A	104.664	101.818	103.241	0.0460175
	HIPK2	MBP	Q9H2X6	HIPK2	105.46	100.903	103.181	0.0451826
	BRSK2	ZIPtide	Q8IWQ3	BRSK2	103.988	102.278	103.133	0.0445038
	MAPKAPK3	Glycogen Synthase-derived peptide	Q16644	MAPKAPK3	103.392	102.87	103.131	0.0444843
	AMPK(A1/B2/G1)	SAMStide + 125 uM AMP	Q13131/O43741/P54619	PRKAA1	103.457	102.719	103.088	0.0438724
	AKT1	Crosstide	P31749	AKT1	103.236	102.831	103.033	0.0431072
	BLK	pEY	P51451	BLK	103.787	102.177	102.982	0.0423939
	DCAMKL2	Autocamtide 2 + Ca-CaM	Q8N568	DCLK2	103.075	102.713	102.894	0.0411557
	p70S6Kb/RPS6KB2	S6K/Rsk2 peptide 2	Q9UBS0	RPS6KB2	103.536	102.22	102.878	0.0409366
	TIE2/TEK	pEY + Mn	Q02763	TEK	103.712	101.821	102.766	0.0393665
	PKCeta	PKCe Pep + Lipid Activator	P24723	PRKCH	103.021	102.429	102.725	0.0387877
	FER	pEY	P16591	FER	102.794	102.597	102.696	0.0383767
	PIM3	Pim2tide	Q86V86	PIM3	102.821	102.386	102.603	0.0370787
	CDK1/cyclin B	Histone H1	P06493	CDK1	103.334	101.841	102.587	0.0368518
	SYK	pEY	P43405	SYK	102.834	102.312	102.573	0.03665
	MNK2	MBP	Q9HBH9	MKNK2	103.392	101.726	102.559	0.0364545
	EPHA6	pEY	Q9UF33	EPHA6	102.758	102.349	102.553	0.0363747
	MLK4	MEK1 (K97R)	Q5TCX8	MAP3K21	103.806	101.272	102.539	0.0361731
	FES/FPS	pEY	P07332	FES	102.721	102.357	102.539	0.0361697
	AMPK(A1/B1/G1)	SAMStide + 125 uM AMP	Q13131/Q9Y478/P54619	PRKAA1	102.686	102.367	102.527	0.0359999
	NEK7	MBP	Q8TDX7	NEK7	104.871	100.141	102.506	0.0357096
	GSK3a	Phospho-Glycogen Synthase peptide	P49840	GSK3A	102.511	102.441	102.476	0.0352839
	TGFBR2	MBP	P37173	TGFBR2	102.698	102.219	102.459	0.0350442
	CDK9/cyclin K	PDKtide	P50750	CDK9	102.998	101.698	102.348	0.0334784
	TAK1	Casein	O43318	MAP3K7	103.136	101.513	102.324	0.0331509
	MINK/MINK1	MBP	Q8N4C8	MINK1	102.303	102.3	102.302	0.0328278
	GCK/MAP4K2	MBP	Q12851	MAP4K2	102.698	101.825	102.262	0.0322665
	AXL	Abltide + Mn	P30530	AXL	102.74	101.77	102.255	0.0321711
	CDK2/cyclin A	Histone H1	P24941	CDK2	102.275	102.171	102.223	0.0317219
	ASK1/MAP3K5	MBP	Q99683	MAP3K5	106.276	98.1678	102.222	0.0317016
	Aurora A	Kemptide	O14965	AURKA	102.647	101.731	102.189	0.0312384
	STK38/NDR1	Modified PKA Substrate	Q15208	STK38	104.134	100.223	102.178	0.0310916
	LCK2/ICK	MBP + Mn	Q9UPZ9	CILK1	103.924	100.387	102.156	0.0307704
	PRKX	Kemptide	P51817	PRKX	102.235	102.027	102.131	0.0304192
	RON/MST1R	Axltide + Mn	Q04912	MST1R	103.32	100.887	102.104	0.0300324
	ALK3/BMPR1A	Casein + Mn	P36894	BMPR1A	102.282	101.837	102.06	0.0294119
	MSK1/RPS6KA5	Crosstide	O75582	RPS6KA5	102.413	101.622	102.018	0.0288168
	ACK1	Abltide	Q07912	TNK2	102.744	101.009	101.876	0.0268206
	RAF1	MEK1 (K97R)	P04049	RAF1	102.074	101.671	101.872	0.0267644
	TYK2	Axltide	P29597	TYK2	102.258	101.438	101.848	0.0264183
	HCK	Src Substrate peptide	P08631	HCK	102.63	101.065	101.847	0.0264095
	FGR	pEY	P09769	FGR	102.682	100.81	101.746	0.0249719
	NLK	MBP	Q9UBE8	NLK	102.8	100.686	101.743	0.0249296
	TYK1/LTK	Abltide	P29376	LTK	102.337	101.051	101.694	0.0242336
	PKCb2	Histone H1 + Lipid Activator	P05771	PRKCB	102.751	100.466	101.609	0.023023
	KDR/VEGFR2	pEY + Mn	P35968	KDR	101.889	101.317	101.603	0.0229425
	HIPK1	MBP	Q86Z02	HIPK1	102.014	101.164	101.589	0.0227469
	MKK6	p38a (K53A)	P52564	MAP2K6	102.058	101.099	101.579	0.0225982
	FGFR2	pEY + Mn	P21802	FGFR2	103.024	100.081	101.553	0.0222317
	SGK3/SGKL	Crosstide	Q96BR1	SGK3	103.032	100.014	101.523	0.0218095
	MYO3B	MBP	Q8WXR4	MYO3B	101.547	101.409	101.478	0.0211693
	LRRK2	LRRKtide	Q5S007	LRRK2	101.708	101.097	101.403	0.0200959
	AMPK(A2/B1/G1)	SAMStide + 125 uM AMP	P54646/Q9Y478/P54619	PRKAA2	101.502	101.138	101.32	0.0189136
	TNIK	LRRKtide	Q9UKE5	TNIK	101.515	101.038	101.276	0.0182975
	PHKg1	ZIPtide	Q16816	PHKG1	101.908	100.602	101.255	0.0179948
	MKK4	JNK(K55M)	P45985	MAP2K4	101.701	100.745	101.223	0.0175358
	ERBB2/HER2	pEY + Mn	P04626	ERBB2	102.998	99.3827	101.19	0.0170683
	CDK14/cyclin Y (PFTK1)	RB Protein	O94921	CDK14	101.334	100.949	101.141	0.016375
	ALK1/ACVRL1	Casein + Mn	P37023	ACVRL1	101.379	100.796	101.088	0.0156085
	TAOK1	MBP	Q7L7X3	TAOK1	101.876	100.295	101.086	0.0155814
	FGFR1	pEY + Mn	P11362	FGFR1	101.645	100.483	101.064	0.0152734
	AKT3	Crosstide	Q9Y243	AKT3	101.12	100.995	101.057	0.0151718
	CAMK1d	Autocamtide 2 + Ca-CaM	Q8IU85	CAMK1D	101.666	100.396	101.031	0.0147918
	CDK1/cyclin A	Histone H1	P06493	CDK1	100.911	100.588	100.749	0.0107675
	CK1g1	CK1tide	Q9HCP0	CSNK1G1	103.224	98.2618	100.743	0.010678
	Aurora B	Kemptide	Q96GD4	AURKB	101.331	100.118	100.724	0.0104133
	STK38L/NDR2	SGKtide	Q9Y2H1	STK38L	101.364	100.044	100.704	0.010122
	RIPK3	MBP	Q9Y572	RIPK3	101.519	99.843	100.681	0.0097929
	SGK2	Crosstide	Q9HBY8	SGK2	102.181	99.1125	100.647	0.00929754
	YES/YES1	pEY	P07947	YES1	105.013	96.2539	100.633	0.00910836
	NEK11	MBP	Q8NG66	NEK11	102.32	98.9418	100.631	0.00907322
	SNARK/NUAK2	MBP	Q9H093	NUAK2	101.865	98.9885	100.427	0.00614158
	CAMK2g	ZIPtide + Ca-CaM*	Q13555	CAMK2G	100.375	100.053	100.214	0.00308199
	ERBB4/HER4	pEY + Mn	Q15303	ERBB4	100.344	100.018	100.181	0.00261433
	PKA	PKA sub	P17612	PRKACA	100.378	99.9786	100.178	0.00256799
	mTOR/FRAP1	4EBP1 + Mn	P42345	MTOR	100.403	99.9106	100.157	0.00225956
	TRKC	pEY	Q16288	NTRK3	101.341	98.8021	100.071	0.00102947
	HIPK3	MBP	Q9H422	HIPK3	101.071	99.0315	100.051	0.000740739
	JAK1	pEY	P23458	JAK1	100.445	99.6492	100.047	0.000680091
	EPHA7	pEY	Q15375	EPHA7	100.521	99.5613	100.041	0.000591016
	c-Src	pEY	P12931	SRC	100.237	99.744	99.9907	-0.000134759
	CDK2/cyclin E	Histone H1	P24941	CDK2	99.9909	99.8945	99.9427	-0.000826788
	CDK1/cyclin E	RB Protein	P06493	CDK1	100.472	99.4132	99.9424	-0.000831643
	DYRK4	DYRKtide	Q9NR20	DYRK4	101.07	98.7902	99.9299	-0.00101187
	AMPK(A2/B2/G1)	SAMStide + 125 uM AMP	P54646/O43741/P54619	PRKAA2	100.634	99.1563	99.8949	-0.00151705
	ERK1/MAPK3	MBP	P27361	MAPK3	100.282	99.4597	99.871	-0.00186296
	PAK3	ZIPtide	O75914	PAK3	101.313	98.4227	99.8676	-0.00191139
	AMPK(A2/B2/G2)	SAMStide + 125 uM AMP	P54646/O43741/Q9UGJ0	PRKAA2	100.14	99.4629	99.8014	-0.00286796
	p70S6K/RPS6KB1	S6K/Rsk2 peptide 2	P23443	RPS6KB1	100.453	99.1297	99.7912	-0.00301587
	CDK18/cyclin Y (PCTK3)	RB Protein	Q07002	CDK18	100.509	98.9609	99.7347	-0.00383222
	CTK/MATK	pEY	P42679	MATK	100.136	99.3074	99.7218	-0.00401915
	CDC7/DBF4	PDKtide	O00311	CDC7	100.029	99.305	99.6669	-0.00481312
	FMS	pEY + Mn	P07333	CSF1R	100.086	99.1042	99.5949	-0.00585586
	EPHA1	pEY + Mn	P21709	EPHA1	101.466	97.6085	99.5372	-0.00669208
	TTBK1	MBP	Q5TCY1	TTBK1	102.253	96.7638	99.5084	-0.00711041
	AMPK(A2/B2/G3)	SAMStide + 125 uM AMP	P54646/O43741/Q9UGI9	PRKAA2	100.356	98.5901	99.473	-0.00762295
	NIM1	CHKtide	Q8IY84	NIM1K	99.7485	99.1413	99.4449	-0.00803044
	PKCa	Histone H1 + Lipid Activator	P17252	PRKCA	99.6226	99.2288	99.4257	-0.00830966
	MLCK/MYLK	ZIPtide + Ca-CaM	Q15746	MYLK	100.452	98.2062	99.329	-0.00971365
	CDK6/cyclin D1	RB-CTF	Q00534	CDK6	99.5249	99.0379	99.2814	-0.0104045
	TNK1	pEY	Q13470	TNK1	99.2833	99.2133	99.2483	-0.0108856
	Haspin	Histone H3	Q8TF76	HASPIN	99.7074	98.6694	99.1884	-0.0117566
	SRMS	pEY + Mn	Q9H3Y6	SRMS	100.65	97.6834	99.1669	-0.0120691
	PDGFRb	pEY + Mn	P09619	PDGFRB	99.3375	98.7873	99.0624	-0.0135908
	LATS1	SGKtide	O95835	LATS1	99.4166	98.6392	99.0279	-0.0140932
	SIK1	AMARA peptide	P57059	SIK1	99.3455	98.6818	99.0137	-0.0143004
	KHS/MAP4K5	MBP	Q9Y4K4	MAP4K5	99.5139	98.4116	98.9628	-0.015042
	LIMK2	Cofilin 2 + Mn	P53671	LIMK2	99.4176	98.4714	98.9445	-0.0153089
	IR	pEY + Mn	P06213	INSR	99.8514	97.9396	98.8955	-0.0160228
	MLK3/MAP3K11	MBP	Q16584	MAP3K11	99.6936	98.0746	98.8841	-0.0161895
	IGF1R	pEY + Mn	P08069	IGF1R	100.022	97.7422	98.8823	-0.0162164
	TRKB	pEY + Mn	Q16620	NTRK2	100.276	97.414	98.8451	-0.0167579
	PLK3	Casein	Q9H4B4	PLK3	100.805	96.8631	98.8338	-0.0169238
	EPHA3	pEY + Mn	P29320	EPHA3	99.4848	98.0219	98.7533	-0.0180984
	ABL2/ARG	Abltide	P42684	ABL2	99.0254	98.4143	98.7198	-0.0185882
	DDR1	IRS1tide	Q08345	DDR1	99.1482	98.2647	98.7064	-0.0187838
	EPHA8	pEY	P29322	EPHA8	98.997	98.411	98.704	-0.0188196
	FYN	pEY	P06241	FYN	99.0257	98.3454	98.6856	-0.0190888
	Aurora C	Kemptide	Q9UQB9	AURKC	101.479	95.7444	98.6118	-0.0201685
	DMPK2/CDC42BPG	DAPK1tide	Q6DT37	CDC42BPG	98.7179	98.496	98.607	-0.0202383
	EEF2K	EEF2Ktide+Ca-CaM	O00418	EEF2K	101.804	95.2404	98.5222	-0.0214794
	STK33	MBP	Q9BYT3	STK33	99.2155	97.7986	98.5071	-0.0217009
	MLCK2/MYLK2	ZIPtide + Ca-CaM	Q9H1R3	MYLK2	100.054	96.7243	98.3893	-0.0234274
	CSK	pEY	P41240	CSK	98.3577	98.2503	98.304	-0.0246777
	FRK/PTK5	pEY + Mn	P42685	FRK	99.3589	97.1631	98.261	-0.0253094
	RET	CHKtide	P07949	RET	98.2402	98.1766	98.2084	-0.0260815
	FAK/PTK2	pEY	Q05397	PTK2	98.456	97.9006	98.1783	-0.0265238
	FLT1/VEGFR1	pEY + Mn	P17948	FLT1	99.57	96.7766	98.1733	-0.0265972
	OSR1/OXSR1	CATCHtide	O95747	OXSR1	99.5734	96.7089	98.1411	-0.0270699
	CHK2	CHKtide	O96017	CHEK2	98.4665	97.6558	98.0612	-0.0282462
	NEK4	MBP	P51957	NEK4	99.1974	96.8165	98.0069	-0.0290443
	CAMK2a	Autocamtide 2 + Ca-CaM	Q9UQM7	CAMK2A	98.1529	97.7329	97.9429	-0.0299876
	JNK3	ATF2	P53779	MAPK10	99.0854	96.775	97.9302	-0.0301744
	CDK16/cyclin Y (PCTAIRE)	RB Protein	Q00536	CDK16	97.9312	97.8948	97.913	-0.0304275
	PEAK1	pEY	Q9H792	PEAK1	97.904	97.6942	97.7991	-0.0321067
	MRCKb/CDC42BPB	Long S6 Kinase substrate peptide	Q9Y5S2	CDC42BPB	98.7374	96.7331	97.7352	-0.0330493
	MSK2/RPS6KA4	Crosstide	O75676	RPS6KA4	97.9703	97.496	97.7332	-0.03308
	MLK2/MAP3K10	MBP	Q02779	MAP3K10	100.327	94.9894	97.6583	-0.0341856
	MST1/STK4	Axltide	Q13043	STK4	97.5963	97.5951	97.5957	-0.0351107
	CAMK4	ZIPtide + Ca-CaM*	Q16566	CAMK4	98.4198	96.6777	97.5487	-0.0358048
	EPHB2	pEY + Mn	P29323	EPHB2	100.046	94.9981	97.5218	-0.0362033
	TAOK2	MBP	Q9UL54	TAOK2	98.2232	96.6928	97.458	-0.0371475
	ALK5/TGFBR1	Casein + Mn	P36897	TGFBR1	98.2821	96.5908	97.4364	-0.0374666
	TLK1	Histone H3	Q9UKI8	TLK1	98.0023	96.8505	97.4264	-0.0376152
	CDK4/cyclin D3	RB-CTF	P11802	CDK4	99.2029	95.6103	97.4066	-0.0379085
	PAK1	Long S6 Kinase substrate peptide	Q13153	PAK1	98.928	95.8823	97.4052	-0.0379299
	WNK1	MBP	Q9H4A3	WNK1	97.6744	97.1146	97.3945	-0.0380878
	IRR/INSRR	Axltide	P14616	INSRR	97.62	97.163	97.3915	-0.0381321
	JNK1	ATF2	P45983	MAPK8	99.7843	94.9873	97.3858	-0.0382167
	MST4	MBP	Q9P289	STK26	98.1641	96.6073	97.3857	-0.0382185
	VRK1	Casein	Q99986	VRK1	97.6122	97.1329	97.3726	-0.0384126
	ROCK1	Long S6 Kinase substrate peptide	Q13464	ROCK1	98.1093	96.6028	97.356	-0.0386576
	MEKK3	MBP	Q99759	MAP3K3	99.9854	94.7156	97.3505	-0.0387398
	P38d/MAPK13	MBP	O15264	MAPK13	97.3119	97.2907	97.3013	-0.039469
	GRK2	Casein	P25098	GRK2	97.8415	96.7415	97.2915	-0.0396144
	PAK5	ZIPtide	Q9P286	PAK5	98.4002	96.1603	97.2803	-0.0397805
	WNK2	MBP	Q9Y3S1	WNK2	97.305	97.184	97.2445	-0.040312
	MAPKAPK5/PRAK	Glycogen Synthase-derived peptide	Q8IW41	MAPKAPK5	97.626	96.8574	97.2417	-0.0403525
	PKCb1	Histone H1 + Lipid Activator	P05771	PRKCB	97.9848	96.3076	97.1462	-0.0417706
	PIM2	Pim2tide	Q9P1W9	PIM2	97.8043	96.459	97.1316	-0.0419868
	PLK1	Casein	P53350	PLK1	97.6667	96.5714	97.1191	-0.0421738
	ULK3	Casein	Q6PHR2	ULK3	98.8063	95.1235	96.9649	-0.0444657
	CDK6/cyclin D3	RB-CTF	Q00534	CDK6	97.3977	96.418	96.9078	-0.0453146
	CDK7/cyclin H	Histone H1	P50613	CDK7	96.9379	96.8609	96.8994	-0.04544
	RSK2	Glycogen Synthase-derived peptide	P51812	RPS6KA3	97.7092	95.8779	96.7935	-0.0470177
	FGFR3	pEY + Mn	P22607	FGFR3	97.5888	95.9972	96.793	-0.0470252
	TLK2	Casein	Q86UE8	TLK2	97.4089	96.1185	96.7637	-0.0474619
	CAMK1a	Autocamtide 2 + Ca-CaM	Q14012	CAMK1	97.2828	96.2303	96.7566	-0.0475684
	ZIPK/DAPK3	ZIPtide	O43293	DAPK3	97.469	96.0323	96.7506	-0.0476569
	ALK	pEY	Q9UM73	ALK	96.7177	96.7038	96.7108	-0.0482517
	RSK1	Glycogen Synthase-derived peptide	Q15418	RPS6KA1	97.8509	95.528	96.6895	-0.0485694
	ROS/ROS1	IGF-1Rtide	P08922	ROS1	97.1616	96.0391	96.6004	-0.0498994
	PDK1/PDPK1	PDKtide	O15530	PDPK1	97.5471	95.5044	96.5257	-0.0510148
	BRAF	MEK1 (K97R)	P15056	BRAF	96.2252	95.988	96.1066	-0.0572922
	CDK5/p35	Histone H1	Q00535	CDK5	96.5479	95.628	96.0879	-0.057573
	STK39/STLK3	CATCHtide	Q9UEW8	STK39	96.1367	95.9908	96.0637	-0.0579362
	PYK2	pEY + Mn	Q14289	PTK2B	96.1028	95.9492	96.026	-0.058503
	JNK2	ATF2	P45984	MAPK9	96.0901	95.9248	96.0075	-0.0587814
	ARAF	MEK1 (K97R)	P10398	ARAF	96.1642	95.7952	95.9797	-0.0591985
	GLK/MAP4K3	MBP	Q8IVH8	MAP4K3	97.3891	94.5678	95.9785	-0.0592175
	TXK	Abltide	P42681	TXK	96.4982	95.4023	95.9503	-0.0596411
	LKB1	LKB1tide	Q15831	STK11	95.9113	95.6658	95.7886	-0.0620748
	PKCtheta	Histone H1 + Lipid Activator	Q04759	PRKCQ	96.7175	94.8417	95.7796	-0.0622103
	PDK4/PDHK4	MBP	Q16654	PDK4	95.8891	95.5655	95.7273	-0.0629979
	c-Kit	pEY + Mn	P10721	KIT	97.9309	93.4863	95.7086	-0.0632795
	TRPM7/CHAK1	MBP + Mn	Q96QT4	TRPM7	98.1767	93.2381	95.7074	-0.0632979
	MNK1	MBP	Q9BUB5	MKNK1	96.1289	94.884	95.5065	-0.0663297
	CAMK1g	Autocamtide 2 + Ca-CaM	Q96NX5	CAMK1G	95.5235	95.4543	95.4889	-0.0665948
	PDK2/PDHK2	MBP	Q15119	PDK2	95.4983	95.1193	95.3088	-0.0693191
	CDK4/cyclin D1	RB-CTF	P11802	CDK4	95.8541	94.7093	95.2817	-0.069729
	PASK	ZIPtide	Q96RG2	PASK	97.3271	92.7613	95.0442	-0.0733299
	STK16	MBP	O75716	STK16	95.214	94.8467	95.0303	-0.0735399
	PHKg2	ZIPtide	P15735	PHKG2	95.2973	94.5465	94.9219	-0.0751872
	GRK7	Casein	Q8WTQ7	GRK7	95.5036	93.8769	94.6902	-0.0787125
	EPHA2	pEY	P29317	EPHA2	96.6383	92.5579	94.5981	-0.0801172
	BTK	pEY	Q06187	BTK	96.9266	92.1914	94.559	-0.0807137
	JAK2	pEY	O60674	JAK2	95.7664	93.3221	94.5442	-0.080939
	FLT3	Abltide	P36888	FLT3	94.9076	94.1199	94.5138	-0.0814031
	ZAP70	pEY	P43403	ZAP70	95.1388	93.4327	94.2857	-0.0848888
	GRK4	Casein	P32298	GRK4	95.8533	92.4226	94.138	-0.0871512
	JAK3	JAK3tide	P52333	JAK3	95.7865	92.397	94.0918	-0.0878594
	EPHB4	pEY	P54760	EPHB4	95.122	92.8547	93.9884	-0.0894458
	DMPK	Axltide	Q09013	DMPK	93.7193	93.3216	93.5205	-0.0966462
	STK32C/YANK3	MBP + Mn	Q86UX6	STK32C	94.0313	92.6345	93.3329	-0.0995421
	EIF2AK1/HRI	MBP	Q9BQI3	EIF2AK1	93.5309	92.4081	92.9695	-0.10517
	PKCmu/PRKD1	Glycogen Synthase-derived peptide	Q15139	PRKD1	92.865	92.8494	92.8572	-0.106914
	TEC	pEY + Mn	P42680	TEC	92.993	92.4597	92.7264	-0.108949
	PAK2	Long S6 Kinase substrate peptide	Q13177	PAK2	92.6184	92.3679	92.4931	-0.112582
	ALK6/BMPR1B	Casein + Mn	O00238	BMPR1B	94.3317	90.3241	92.3279	-0.115161
	COT1/MAP3K8	MEK1 (K97R)	P41279	MAP3K8	94.0464	90.5444	92.2954	-0.115669
	PAK4	MBP	O96013	PAK4	92.0829	90.6841	91.3835	-0.129994
	IKKa/CHUK	IKKtide	O15111	CHUK	95.1919	86.6221	90.907	-0.137536
	EPHB3	pEY	P54753	EPHB3	90.6842	89.8143	90.2492	-0.148013
	EIF2AK3/PERK	MBP	Q9NZJ5	EIF2AK3	90.5722	89.5639	90.068	-0.150913
	IKKb/IKBKB	IKKtide	O14920	IKBKB	90.6615	88.0959	89.3787	-0.161997
	MEKK2	MBP	Q9Y2U5	MAP3K2	92.8798	85.7489	89.3144	-0.163035
	BMPR2	MBP	Q13873	BMPR2	87.7838	87.7365	87.7601	-0.188362
	LCK	pEY + Mn	P06239	LCK	87.328	86.967	87.1475	-0.198469
	BRK	pEY + Mn	Q13882	PTK6	87.4894	86.5758	87.0326	-0.200372
	CAMKK1	MBP + Ca-CaM	Q8N5S9	CAMKK1	91.2066	82.7103	86.9585	-0.201601
	NEK2	MBP	P51955	NEK2	86.3852	84.4947	85.44	-0.227017
	GRK1	Casein	Q15835	GRK1	86.8575	83.103	84.9802	-0.234801
	IKKe/IKBKE	Casein	Q14164	IKBKE	85.967	83.7297	84.8483	-0.237042
	PLK2	Casein	Q9NYY3	PLK2	84.7822	83.9064	84.3443	-0.245638
	MLK1/MAP3K9	Casein	P80192	MAP3K9	85.393	82.5766	83.9848	-0.2518
	CDK5/p25	Histone H1	Q00535	CDK5	84.2067	83.7449	83.9758	-0.251954
	DYRK1/DYRK1A	DYRKtide	Q13627	DYRK1A	82.9713	82.6268	82.7991	-0.272314
	PKCnu/PRKD3	Glycogen Synthase-derived peptide	O94806	PRKD3	79.8221	79.6297	79.7259	-0.32688
	RIPK2	MBP	O43353	RIPK2	78.6898	78.3634	78.5266	-0.348746
	DYRK1B	DYRKtide	Q9Y463	DYRK1B	77.4744	77.4287	77.4516	-0.368634
	GRK3	Casein	P35626	GRK3	77.6792	77.0097	77.3445	-0.37063
	GRK6	Casein	P43250	GRK6	78.3516	75.1535	76.7525	-0.381714
	GRK5	Casein	P34947	GRK5	75.3075	73.4531	74.3803	-0.427008
	MSSK1/STK23	RS peptide	Q9UPE1	SRPK3	74.2978	73.4307	73.8643	-0.437051
	PKN1/PRK1	Glycogen Synthase-derived peptide	Q16512	PKN1	74.4998	67.4489	70.9743	-0.49463
	ALK4/ACVR1B	Casein + Mn	P36896	ACVR1B	70.2437	68.0158	69.1298	-0.532621

## Sheet: Screen DDX50
	Kinase Assay Name	General Kinase Substrate	Kinase Uniprot ID	Kinase Official Symbol	Data 1	Data 2	Mean Kinase Activity (%)	Log2 Fold Change		Kinase Profiling Screen with DDX50
	CK2a2	CK2 sub	P19784	CSNK2A2	653.734	650.25	651.992	2.70485		DDX50 was tested in single dose duplicate mode at a concentration of 100 nM. Reactions were carried out at 50 μM ATP. CK1a1 was assayed 3 times and CK1epsilon was assayed 2 times. Data represent % kinase activity relative to buffer controls.
	CK2a	CK2 sub	P68400	CSNK2A1	244.504	243.622	244.063	1.28725
	SRPK1	RS peptide	Q96SB4	SRPK1	252.163	234.839	243.501	1.28393
	FLT3	Abltide	P36888	FLT3	215.077	208.099	211.588	1.08126
	PLK2	Casein	Q9NYY3	PLK2	193.667	192.948	193.307	0.950895
	MARK3	CHKtide	P27448	MARK3	190.864	185.445	188.155	0.911918
	CAMK2b	Autocamtide 2 + Ca-CaM	Q13554	CAMK2B	188.367	184.211	186.289	0.897542
	IKKe/IKBKE	Casein	Q14164	IKBKE	175.172	172.627	173.899	0.798252
	CTK/MATK	pEY	P42679	MATK	170.77	168.268	169.519	0.761444
	MARK2/PAR-1Ba	CHKtide	Q7KZI7	MARK2	147.324	146.516	146.92	0.555034
	MARK1	CHKtide	Q9P0L2	MARK1	146.255	140.502	143.379	0.519829
	STK22D/TSSK1	CHKtide	Q9BXA7	TSSK1B	141.832	141.052	141.442	0.500211
	GRK6	Casein	P43250	GRK6	141.185	138.615	139.9	0.484394
	MARK4	CHKtide	Q96L34	MARK4	142.13	137.046	139.588	0.481179
	SRMS	pEY + Mn	Q9H3Y6	SRMS	137.999	137.806	137.903	0.46365
	c-MET	MBP	P08581	MET	138.321	135.306	136.813	0.452206
	PDK2/PDHK2	MBP	Q15119	PDK2	135.808	130.346	133.077	0.412261
	PDK1/PDHK1	MBP	Q15118	PDK1	134.02	131.474	132.747	0.408678
	EPHA3	pEY + Mn	P29320	EPHA3	133.471	131.9	132.686	0.408013
	ERBB4/HER4	pEY + Mn	Q15303	ERBB4	132.479	132.109	132.294	0.403749
	GRK4	Casein	P32298	GRK4	133.922	130.082	132.002	0.400559
	MKK6	p38a (K53A)	P52564	MAP2K6	129.587	128.639	129.113	0.368632
	PDK3/PDHK3	MBP	Q15120	PDK3	132.987	123.987	128.487	0.361621
	CDK1/cyclin A	Histone H1	P06493	CDK1	129.8	127	128.4	0.360643
	PKCg	Histone H1 + Lipid Activator	P05129	PRKCG	129.299	125.333	127.316	0.34841
	DYRK1B	DYRKtide	Q9Y463	DYRK1B	127.976	125.99	126.983	0.344636
	FLT4/VEGFR3	pEY + Mn	P35916	FLT4	126.623	126.437	126.53	0.33948
	EGFR	pEY + Mn	P00533	EGFR	127.229	125.669	126.449	0.338551
	STK38/NDR1	Modified PKA Substrate	Q15208	STK38	126.469	125.347	125.908	0.33237
	MEK2	ERK(K52R)	P36507	MAP2K2	126.287	123.776	125.032	0.322294
	PDGFRa	pEY + Mn	Q9DE49	PDGFRA	127.272	121.647	124.46	0.315678
	WEE1	MBP	P30291	WEE1	129.455	118.916	124.185	0.312493
	TYRO3/SKY	pEY + Mn	Q06418	TYRO3	124.857	122.806	123.832	0.308379
	CDK3/cyclin E	Histone H1	Q00526	CDK3	123.395	121.924	122.659	0.294657
	KDR/VEGFR2	pEY + Mn	P35968	KDR	122.686	121.622	122.154	0.288699
	EPHA5	pEY + Mn	P54756	EPHA5	121.775	121.337	121.556	0.281624
	PKG2/PRKG2	Kemptide	Q13237	PRKG2	120.641	119.79	120.215	0.265621
	PAK6	ZIPtide	Q9NQU5	PAK6	120.249	119.781	120.015	0.263215
	CAMK2d	ZIPtide + Ca-CaM*	Q13557	CAMK2D	121.01	118.702	119.856	0.261305
	FLT1/VEGFR1	pEY + Mn	P17948	FLT1	120.911	118.743	119.827	0.260954
	FGFR1	pEY + Mn	P11362	FGFR1	119.523	118.831	119.177	0.253108
	EPHA4	pEY + Mn	P54764	EPHA4	119.405	118.816	119.111	0.252304
	BMX/ETK	pEY	P51813	BMX	119.165	117.945	118.555	0.245555
	EPHA8	pEY	P29322	EPHA8	119.514	116.492	118.003	0.238826
	CAMK2a	Autocamtide 2 + Ca-CaM	Q9UQM7	CAMK2A	118.512	117.441	117.976	0.238497
	MEK1	ERK(K52R)	Q02750	MAP2K1	118.435	116.832	117.633	0.234297
	SNARK/NUAK2	MBP	Q9H093	NUAK2	118.43	116.598	117.514	0.23283
	IR	pEY + Mn	P06213	INSR	118.793	115.854	117.323	0.230492
	PKAcg	Long S6 Kinase substrate peptide	P22612	PRKACG	119.25	115.107	117.179	0.228711
	PLK3	Casein	Q9H4B4	PLK3	117.607	116.54	117.074	0.227417
	CDK2/cyclin A1	Histone H1	P24941	CDK2	117.001	116.986	116.993	0.226428
	CDK1/cyclin B	Histone H1	P06493	CDK1	117.221	115.822	116.521	0.220594
	CAMK2g	ZIPtide + Ca-CaM*	Q13555	CAMK2G	117.203	115.84	116.521	0.220592
	ULK2	MBP	Q8IYT8	ULK2	115.32	115.314	115.317	0.205604
	TIE2/TEK	pEY + Mn	Q02763	TEK	115.296	114.671	114.983	0.201424
	EPHA2	pEY	P29317	EPHA2	114.159	113.832	113.995	0.188976
	ERBB2/HER2	pEY + Mn	P04626	ERBB2	113.881	113.292	113.587	0.183794
	PKAcb	Long S6 Kinase substrate peptide	P22694	PRKACB	113.404	113.318	113.361	0.180924
	DYRK4	DYRKtide	Q9NR20	DYRK4	112.831	111.921	112.376	0.168337
	CDK2/cyclin O	Histone H1	P24941	CDK2	112.378	111.994	112.186	0.165896
	FGFR2	pEY + Mn	P21802	FGFR2	113.081	111.169	112.125	0.165108
	GSK3b	Phospho-Glycogen Synthase peptide	P49841	GSK3B	113.284	110.714	111.999	0.163485
	MAPKAPK2	Glycogen Synthase-derived peptide	P49137	MAPKAPK2	113.488	109.334	111.411	0.15589
	MEK3	p38a (K53A)	P46734	MAP2K3	111.686	110.686	111.186	0.152974
	BRSK1	CHKtide	Q8TDC3	BRSK1	111.664	110.429	111.047	0.151167
	PDK4/PDHK4	MBP	Q16654	PDK4	111.354	110.44	110.897	0.149219
	DNA-PK	DNA-PKtide+ dsDNA	P78527	PRKDC	110.955	110.72	110.838	0.148449
	BRAF	MEK1 (K97R)	P15056	BRAF	111.139	110.367	110.753	0.14735
	TBK1	CK1tide	Q9UHD2	TBK1	110.552	110.46	110.506	0.144123
	ALK4/ACVR1B	Casein + Mn	P36896	ACVR1B	112.384	108.25	110.317	0.141654
	SYK	pEY	P43405	SYK	110.306	110.298	110.302	0.141465
	EPHB1	pEY	P54762	EPHB1	110.373	110.026	110.199	0.140114
	MLK4	MEK1 (K97R)	Q5TCX8	MAP3K21	110.318	109.608	109.963	0.137021
	FER	pEY	P16591	FER	110.475	109.149	109.812	0.135039
	GSK3a	Phospho-Glycogen Synthase peptide	P49840	GSK3A	110.576	109	109.788	0.134723
	MINK/MINK1	MBP	Q8N4C8	MINK1	110.594	108.848	109.721	0.133835
	CK1epsilon	CK1tide	P49674	CSNK1E	110.518	108.782	109.65	0.132908
	CDK2/cyclin A	Histone H1	P24941	CDK2	109.468	108.587	109.028	0.124692
	TYK1/LTK	Abltide	P29376	LTK	109.663	108.23	108.947	0.123622
	DLK/MAP3K12	MBP	Q12852	MAP3K12	110.197	107.557	108.877	0.122698
	PKCtheta	Histone H1 + Lipid Activator	Q04759	PRKCQ	111.185	104.941	108.063	0.111872
	BRSK2	ZIPtide	Q8IWQ3	BRSK2	108.549	107.238	107.894	0.109613
	MKK7	JNK (K55M)	O14733	MAP2K7	108.944	106.238	107.591	0.105559
	PAK5	ZIPtide	Q9P286	PAK5	109.042	106.098	107.57	0.105275
	AKT2	Crosstide	P31751	AKT2	109.664	105.383	107.523	0.10465
	CDC7/DBF4	PDKtide	O00311	CDC7	107.395	107.303	107.349	0.102308
	CK1epsilon	CK1tide	P49674	CSNK1E	107.315	107.234	107.275	0.101313
	RIPK5	MBP	Q6XUX3	DSTYK	108.108	106.082	107.095	0.0988914
	TRKA	pEY + Mn	P04629	NTRK1	108.753	105.254	107.004	0.0976614
	RSK4	Long S6 Kinase substrate peptide	Q9UK32	RPS6KA6	107.54	106.193	106.867	0.0958103
	SIK2	AMARA peptide	Q9H0K1	SIK2	107.557	105.741	106.649	0.0928689
	CK1g1	CK1tide	Q9HCP0	CSNK1G1	106.589	106.463	106.526	0.0912024
	MSK2/RPS6KA4	Crosstide	O75676	RPS6KA4	106.731	106.2	106.465	0.0903802
	JAK2	pEY	O60674	JAK2	107.074	105.799	106.436	0.0899916
	STK33	MBP	Q9BYT3	STK33	106.589	106.275	106.432	0.0899317
	PRKX	Kemptide	P51817	PRKX	106.772	106.075	106.423	0.0898133
	PKA	PKA sub	P17612	PRKACA	106.635	104.748	105.692	0.0798594
	HGK/MAP4K4	MBP	O95819	MAP4K4	105.885	105.488	105.687	0.0797959
	PBK/TOPK	MBP	Q96KB5	PBK	107.318	103.851	105.585	0.078399
	MST4	MBP	Q9P289	STK26	109.603	101.275	105.439	0.0764105
	ERK7/MAPK15	MBP	Q8TD08	MAPK15	106.291	104.106	105.199	0.0731175
	PKCzeta	PKCepsilon Peptide	Q05513	PRKCZ	105.725	104.242	104.984	0.0701683
	PKCa	Histone H1 + Lipid Activator	P17252	PRKCA	105.665	104.298	104.982	0.0701364
	LIMK2	Cofilin 2 + Mn	P53671	LIMK2	105.101	104.642	104.872	0.0686238
	SRPK2	RS peptide	P78362	SRPK2	104.941	104.776	104.858	0.0684422
	ZAK/MLTK	MBP	Q9NYL2	MAP3K20	107.774	101.903	104.838	0.0681682
	MKK4	JNK(K55M)	P45985	MAP2K4	106.368	103.054	104.711	0.066409
	MAPKAPK3	Glycogen Synthase-derived peptide	Q16644	MAPKAPK3	104.801	104.153	104.477	0.0631876
	ALK2/ACVR1	Casein + Mn	Q04771	ACVR1	105.142	103.556	104.349	0.0614117
	TLK1	Histone H3	Q9UKI8	TLK1	104.413	104.142	104.277	0.0604274
	NEK11	MBP	Q8NG66	NEK11	107.585	100.858	104.222	0.0596533
	PEAK1	pEY	Q9H792	PEAK1	104.635	103.566	104.1	0.0579758
	SGK1	Crosstide	O00141	SGK1	104.942	103.015	103.978	0.0562818
	RAF1	MEK1 (K97R)	P04049	RAF1	104.715	102.84	103.777	0.0534933
	CDK4/cyclin D1	RB-CTF	P11802	CDK4	103.995	103.522	103.758	0.0532275
	JNK3	ATF2	P53779	MAPK10	105.327	102.122	103.725	0.0527592
	JNK2	ATF2	P45984	MAPK9	104.369	103.037	103.703	0.0524588
	FAK/PTK2	pEY	Q05397	PTK2	103.96	103.303	103.631	0.051457
	ARAF	MEK1 (K97R)	P10398	ARAF	103.952	103.093	103.523	0.0499485
	PKN3/PRK3	SGKtide	Q6P5Z2	PKN3	103.624	103.402	103.513	0.0498119
	LIMK1	Cofilin 1	P53667	LIMK1	103.963	102.972	103.468	0.0491816
	COT1/MAP3K8	MEK1 (K97R)	P41279	MAP3K8	107.719	99.2062	103.463	0.0491125
	TRPM7/CHAK1	MBP + Mn	Q96QT4	TRPM7	105.419	100.962	103.191	0.0453106
	CDK2/cyclin E	Histone H1	P24941	CDK2	103.337	102.37	102.854	0.0405911
	PYK2	pEY + Mn	Q14289	PTK2B	103.17	102.498	102.834	0.0403173
	PKG1a	Kemptide	Q13976	PRKG1	104.794	100.452	102.623	0.0373537
	TEC	pEY + Mn	P42680	TEC	104.12	100.938	102.529	0.0360361
	PKCeta	PKCe Pep + Lipid Activator	P24723	PRKCH	103.063	101.601	102.332	0.0332579
	PKCb2	Histone H1 + Lipid Activator	P05771	PRKCB	102.297	102.21	102.253	0.0321467
	TSSK2	CHKtide	Q96PF2	TSSK2	102.197	101.778	101.988	0.0283934
	SGK3/SGKL	Crosstide	Q96BR1	SGK3	103.455	100.234	101.845	0.0263698
	PDK1/PDPK1	PDKtide	O15530	PDPK1	101.904	101.459	101.681	0.0240548
	MELK	ZIPtide	Q14680	MELK	101.85	101.482	101.666	0.023837
	VRK1	Casein	Q99986	VRK1	102.176	100.764	101.47	0.0210498
	LYN	pEY	P07948	LYN	101.912	100.92	101.416	0.0202899
	CLK4	MBP	Q9HAZ1	CLK4	102.956	99.5043	101.23	0.0176425
	NEK6	MBP	Q9HC98	NEK6	104.616	97.8166	101.216	0.0174434
	JNK1	ATF2	P45983	MAPK8	101.453	100.884	101.168	0.0167575
	TNIK	LRRKtide	Q9UKE5	TNIK	101.348	100.534	100.941	0.0135143
	FMS	pEY + Mn	P07333	CSF1R	101.343	100.257	100.8	0.011498
	Haspin	Histone H3	Q8TF76	HASPIN	100.681	100.551	100.616	0.00885728
	EPHA7	pEY	Q15375	EPHA7	101.194	99.3299	100.262	0.00377615
	IGF1R	pEY + Mn	P08069	IGF1R	101.908	98.535	100.221	0.00318926
	CAMK1d	Autocamtide 2 + Ca-CaM	Q8IU85	CAMK1D	100.188	100.177	100.182	0.00262829
	SSTK/TSSK6	MBP	Q9BXA6	TSSK6	100.945	98.6497	99.7972	-0.00292825
	CAMK1g	Autocamtide 2 + Ca-CaM	Q96NX5	CAMK1G	100.257	99.3019	99.7797	-0.00318203
	DYRK3	DYRKtide	O43781	DYRK3	100.601	98.4528	99.5267	-0.00684437
	ACK1	Abltide	Q07912	TNK2	100.026	98.4238	99.225	-0.0112238
	PKD2/PRKD2	Glycogen Synthase-derived peptide	Q9BZL6	PRKD2	99.2935	98.9546	99.1241	-0.0126928
	MNK2	MBP	Q9HBH9	MKNK2	99.1146	99.0248	99.0697	-0.0134843
	CAMK4	ZIPtide + Ca-CaM*	Q16566	CAMK4	99.3209	98.6497	98.9853	-0.0147144
	CDK5/p25	Histone H1	Q00535	CDK5	99.0214	98.4949	98.7581	-0.0180284
	c-Kit	pEY + Mn	P10721	KIT	99.6705	97.8049	98.7377	-0.018327
	TRKB	pEY + Mn	Q16620	NTRK2	98.729	98.4961	98.6126	-0.0201565
	DAPK2	ZIPtide + Ca-CaM	Q9UIK4	DAPK2	99.3796	97.65	98.5148	-0.0215878
	MST2/STK3	MBP	Q13188	STK3	99.9028	96.9608	98.4318	-0.0228031
	CSK	pEY	P41240	CSK	98.4797	98.3808	98.4302	-0.0228264
	EIF2AK3/PERK	MBP	Q9NZJ5	EIF2AK3	99.1737	97.6191	98.3964	-0.0233229
	DDR1	IRS1tide	Q08345	DDR1	98.4577	98.1215	98.2896	-0.0248891
	ERK1/MAPK3	MBP	P27361	MAPK3	99.9164	96.6162	98.2663	-0.0252316
	CDK9/cyclin T1	PDKtide	P50750	CDK9	100.773	95.2443	98.0086	-0.0290201
	CDK1/cyclin E	RB Protein	P06493	CDK1	98.3755	97.4463	97.9109	-0.0304585
	GRK3	Casein	P35626	GRK3	100.012	95.7183	97.8653	-0.0311304
	TXK	Abltide	P42681	TXK	97.9219	97.7751	97.8485	-0.0313788
	GRK1	Casein	Q15835	GRK1	100.406	95.2825	97.844	-0.0314441
	TESK1	Cofilin 2 + Mn	Q15569	TESK1	98.1284	97.4447	97.7866	-0.0322918
	TAK1	Casein	O43318	MAP3K7	100.047	95.4933	97.7703	-0.0325318
	PKCb1	Histone H1 + Lipid Activator	P05771	PRKCB	97.7658	97.7314	97.7486	-0.0328519
	AKT3	Crosstide	Q9Y243	AKT3	98.5073	96.8842	97.6958	-0.0336319
	AXL	Abltide + Mn	P30530	AXL	98.1985	97.0257	97.6121	-0.0348677
	TYK2	Axltide	P29597	TYK2	97.1617	96.9974	97.0795	-0.0427608
	IKKa/CHUK	IKKtide	O15111	CHUK	97.1283	96.7443	96.9363	-0.0448911
	CDK4/cyclin D3	RB-CTF	P11802	CDK4	97.5425	96.308	96.9252	-0.0450559
	SIK1	AMARA peptide	P57059	SIK1	98.2502	95.0473	96.6488	-0.049177
	MAPKAPK5/PRAK	Glycogen Synthase-derived peptide	Q8IW41	MAPKAPK5	96.7475	96.4339	96.5907	-0.0500443
	IRAK4	MBP	Q9NWZ3	IRAK4	97.5352	95.6299	96.5825	-0.0501657
	ALK1/ACVRL1	Casein + Mn	P37023	ACVRL1	96.6976	96.4171	96.5573	-0.0505421
	AMPK(A1/B2/G1)	SAMStide + 125 uM AMP	Q13131/O43741/P54619	PRKAA1	97.0763	95.2882	96.1822	-0.0561577
	CDK5/p35	Histone H1	Q00535	CDK5	96.0696	95.8922	95.9809	-0.0591813
	MEKK1	MBP	Q13233	MAP3K1	96.0393	95.5973	95.8183	-0.0616274
	NEK9	MBP	Q8TD19	NEK9	96.6847	94.879	95.7818	-0.062176
	CDK6/cyclin D1	RB-CTF	Q00534	CDK6	95.7922	95.3974	95.5948	-0.0649955
	IRR/INSRR	Axltide	P14616	INSRR	96.2518	94.5299	95.3909	-0.0680766
	LYN B	pEY+ Mn	P07948	LYN	95.5648	95.014	95.2894	-0.0696124
	CLK3	MBP	P49761	CLK3	95.5805	94.8911	95.2358	-0.0704241
	HIPK2	MBP	Q9H2X6	HIPK2	95.9781	94.2865	95.1323	-0.0719927
	Aurora C	Kemptide	Q9UQB9	AURKC	95.6359	94.2281	94.932	-0.075033
	STK39/STLK3	CATCHtide	Q9UEW8	STK39	96.1771	93.6506	94.9138	-0.0753098
	SLK/STK2	Histone H3	Q9H2G2	SLK	97.1064	92.4528	94.7796	-0.0773522
	GCK/MAP4K2	MBP	Q12851	MAP4K2	96.0256	93.2353	94.6305	-0.0796232
	CAMK1a	Autocamtide 2 + Ca-CaM	Q14012	CAMK1	94.7865	94.3986	94.5926	-0.0802015
	ERK5/MAPK7	MBP	Q13164	MAPK7	94.7419	94.0982	94.42	-0.0828349
	MSSK1/STK23	RS peptide	Q9UPE1	SRPK3	94.8235	93.8981	94.3608	-0.08374
	RIPK3	MBP	Q9Y572	RIPK3	94.5511	94.0831	94.3171	-0.0844083
	RON/MST1R	Axltide + Mn	Q04912	MST1R	94.6128	93.9641	94.2884	-0.0848474
	MSK1/RPS6KA5	Crosstide	O75582	RPS6KA5	95.3339	92.9611	94.1475	-0.0870048
	CDK18/cyclin Y (PCTK3)	RB Protein	Q07002	CDK18	94.7585	93.2834	94.021	-0.0889457
	AKT1	Crosstide	P31749	AKT1	95.2177	92.7217	93.9697	-0.0897319
	HCK	Src Substrate peptide	P08631	HCK	99.8468	87.6127	93.7298	-0.0934208
	ITK	MBP	Q08881	ITK	93.9632	93.4537	93.7085	-0.0937488
	EIF2AK4/GCN2	RS peptide	Q9P2K8	EIF2AK4	94.1054	93.2577	93.6815	-0.0941635
	TRKC	pEY	Q16288	NTRK3	94.0969	93.1586	93.6278	-0.0949914
	STK32C/YANK3	MBP + Mn	Q86UX6	STK32C	94.83	92.2614	93.5457	-0.0962561
	AMPK(A1/B1/G1)	SAMStide + 125 uM AMP	Q13131/Q9Y478/P54619	PRKAA1	94.6256	92.3589	93.4923	-0.097081
	ERK2/MAPK1	MBP	P28482	MAPK1	95.1609	91.5093	93.3351	-0.0995089
	ABL1	Abltide	P00519	ABL1	93.5033	93.1128	93.3081	-0.0999261
	TSSK3/STK22C	CHKtide	Q96PN8	TSSK3	94.0781	92.5256	93.3018	-0.100023
	ROCK2	Long S6 Kinase substrate peptide	O75116	ROCK2	93.5216	92.5322	93.0269	-0.10428
	CDK6/cyclin D3	RB-CTF	Q00534	CDK6	93.3364	92.678	93.0072	-0.104586
	FRK/PTK5	pEY + Mn	P42685	FRK	94.3554	91.4982	92.9268	-0.105833
	EPHA1	pEY + Mn	P21709	EPHA1	94.3021	91.473	92.8876	-0.106443
	EIF2AK2	RS peptide	P19525	EIF2AK2	92.9269	92.3902	92.6585	-0.110004
	CLK1	MBP	P49759	CLK1	93.1186	92.185	92.6518	-0.110109
	P38g/MAPK12	MBP	P53778	MAPK12	94.1118	91.1855	92.6487	-0.110158
	IRAK1	MBP	P51617	IRAK1	93.252	92.0236	92.6378	-0.110327
	CDK7/cyclin H	Histone H1	P50613	CDK7	92.5626	91.8395	92.201	-0.117145
	IKKb/IKBKB	IKKtide	O14920	IKBKB	92.1558	91.5174	91.8366	-0.122858
	STK32B/YANK2	MBP + Mn	Q9NY57	STK32B	92.7083	90.9176	91.813	-0.12323
	PLK1	Casein	P53350	PLK1	91.4689	91.4617	91.4653	-0.128704
	MRCKb/CDC42BPB	Long S6 Kinase substrate peptide	Q9Y5S2	CDC42BPB	92.4451	90.2174	91.3313	-0.130819
	ROCK1	Long S6 Kinase substrate peptide	Q13464	ROCK1	91.9393	90.6164	91.2778	-0.131663
	LCK2/ICK	MBP + Mn	Q9UPZ9	CILK1	91.0461	90.3682	90.7072	-0.140712
	NLK	MBP	Q9UBE8	NLK	91.5691	89.7129	90.641	-0.141765
	JAK3	JAK3tide	P52333	JAK3	92.085	88.4319	90.2585	-0.147866
	CLK2	MBP	P49760	CLK2	92.9936	87.4443	90.2189	-0.148498
	PAK4	MBP	O96013	PAK4	90.8613	89.4925	90.1769	-0.14917
	MUSK	MBP	O15146	MUSK	90.2748	89.626	89.9504	-0.152799
	PIM2	Pim2tide	Q9P1W9	PIM2	90.5737	89.2853	89.9295	-0.153134
	DCAMKL2	Autocamtide 2 + Ca-CaM	Q8N568	DCLK2	89.8934	89.8565	89.875	-0.154009
	AMPK(A1/B1/G2)	SAMStide + 125 uM AMP	Q13131/Q9Y478/Q9UGJ0	PRKAA1	91.296	88.3654	89.8307	-0.154719
	c-Src	pEY	P12931	SRC	90.7715	88.8465	89.809	-0.155067
	MRCKa/CDC42BPA	Long S6 Kinase substrate peptide	Q5VT25	CDC42BPA	90.2336	88.75	89.4918	-0.160173
	BLK	pEY	P51451	BLK	90.224	88.7433	89.4836	-0.160304
	YES/YES1	pEY	P07947	YES1	90.0402	88.7437	89.392	-0.161782
	CDK16/cyclin Y (PCTAIRE)	RB Protein	Q00536	CDK16	90.1704	88.5762	89.3733	-0.162084
	ALK3/BMPR1A	Casein + Mn	P36894	BMPR1A	89.2614	88.6971	88.9793	-0.168458
	MLK3/MAP3K11	MBP	Q16584	MAP3K11	88.9609	88.5872	88.7741	-0.17179
	SIK3	AMARA peptide	Q9Y2K2	SIK3	89.6056	87.8965	88.751	-0.172164
	P38b/MAPK11	MBP	Q15759	MAPK11	89.0799	88.322	88.7009	-0.172979
	LOK/STK10	Axltide	O94804	STK10	90.0175	86.9108	88.4641	-0.176836
	AMPK(A2/B1/G1)	SAMStide + 125 uM AMP	P54646/Q9Y478/P54619	PRKAA2	88.556	88.3607	88.4583	-0.17693
	PAK1	Long S6 Kinase substrate peptide	Q13153	PAK1	89.0182	87.8536	88.4359	-0.177296
	ZAP70	pEY	P43403	ZAP70	88.8202	87.9023	88.3613	-0.178514
	ABL2/ARG	Abltide	P42684	ABL2	89.9688	86.6359	88.3024	-0.179476
	GRK7	Casein	Q8WTQ7	GRK7	88.7113	87.5053	88.1083	-0.18265
	HIPK1	MBP	Q86Z02	HIPK1	89.1427	86.8914	88.017	-0.184145
	GRK5	Casein	P34947	GRK5	90.3648	85.2997	87.8323	-0.187177
	TAOK1	MBP	Q7L7X3	TAOK1	88.5797	86.5529	87.5663	-0.191552
	MYLK3	ZIPtide + Ca-CaM	Q32MK0	MYLK3	87.283	86.9932	87.1381	-0.198624
	DCAMKL1	Autocamtide 2 + Ca-CaM	O15075	DCLK1	88.2136	85.6508	86.9322	-0.202037
	KHS/MAP4K5	MBP	Q9Y4K4	MAP4K5	87.6032	85.9474	86.7753	-0.204643
	CDK14/cyclin Y (PFTK1)	RB Protein	O94921	CDK14	87.0988	86.2591	86.679	-0.206246
	ROS/ROS1	IGF-1Rtide	P08922	ROS1	87.3204	85.9191	86.6198	-0.207232
	P38d/MAPK13	MBP	O15264	MAPK13	87.6056	85.6333	86.6195	-0.207237
	FGR	pEY	P09769	FGR	88.0174	84.833	86.4252	-0.210476
	CAMK1b	Autocamtide 2 + Ca-CaM	Q6P2M8	PNCK	86.9056	85.8038	86.3547	-0.211653
	MNK1	MBP	Q9BUB5	MKNK1	87.3534	85.3524	86.3529	-0.211683
	EPHB2	pEY + Mn	P29323	EPHB2	87.8145	84.4548	86.1347	-0.215334
	RIPK2	MBP	O43353	RIPK2	87.6378	84.5091	86.0734	-0.21636
	FYN	pEY	P06241	FYN	86.0313	85.3702	85.7007	-0.22262
	TNK1	pEY	Q13470	TNK1	85.6598	85.4592	85.5595	-0.225
	HIPK3	MBP	Q9H422	HIPK3	85.7467	85.2505	85.4986	-0.226027
	CAMKK2	MBP + Ca-CaM	Q96RR4	CAMKK2	86.2894	84.5238	85.4066	-0.227581
	EPHB3	pEY	P54753	EPHB3	85.7311	84.8849	85.308	-0.229247
	mTOR/FRAP1	4EBP1 + Mn	P42345	MTOR	85.9518	84.6338	85.2928	-0.229504
	HIPK4	MBP	Q8NE63	HIPK4	86.6704	83.5672	85.1188	-0.23245
	ULK1	MBP	O75385	ULK1	85.5105	84.219	84.8647	-0.236763
	CK1d	CK1tide	P48730	CSNK1D	85.0635	84.5826	84.823	-0.237472
	FGFR3	pEY + Mn	P22607	FGFR3	85.5194	83.9866	84.753	-0.238663
	EPHA6	pEY	Q9UF33	EPHA6	85.2341	83.9252	84.5797	-0.241617
	MLCK/MYLK	ZIPtide + Ca-CaM	Q15746	MYLK	85.0586	83.6389	84.3487	-0.245562
	TLK2	Casein	Q86UE8	TLK2	84.1657	84.1555	84.1606	-0.248783
	DYRK1/DYRK1A	DYRKtide	Q13627	DYRK1A	84.3533	83.7809	84.0671	-0.250387
	MLK2/MAP3K10	MBP	Q02779	MAP3K10	84.231	83.758	83.9945	-0.251634
	NEK2	MBP	P51955	NEK2	83.9935	83.9569	83.9752	-0.251965
	FGFR4	pEY + Mn	P22455	FGFR4	84.6451	83.2905	83.9678	-0.252092
	PIM1	S6K/Rsk2 peptide 2	P11309	PIM1	84.9808	82.6525	83.8167	-0.254691
	DRAK1/STK17A	ZIPtide	Q9UEE5	STK17A	83.8298	83.171	83.5004	-0.260145
	PKCepsilon	S25 PKC Peptide	Q02156	PRKCE	87.4115	79.137	83.2743	-0.264057
	AMPK(A1/B1/G3)	SAMStide + 125 uM AMP	Q13131/Q9Y478/Q9UGI9	PRKAA1	84.1192	82.3265	83.2228	-0.264949
	ALK6/BMPR1B	Casein + Mn	O00238	BMPR1B	82.3981	82.3161	82.3571	-0.280035
	GLK/MAP4K3	MBP	Q8IVH8	MAP4K3	84.2434	80.3638	82.3036	-0.280973
	Aurora B	Kemptide	Q96GD4	AURKB	83.0926	81.4042	82.2484	-0.281941
	TAOK2	MBP	Q9UL54	TAOK2	82.5474	81.6314	82.0894	-0.284733
	ALK	pEY	Q9UM73	ALK	82.7266	81.2553	81.9909	-0.286464
	EPHB4	pEY	P54760	EPHB4	82.4711	81.1731	81.8221	-0.289437
	P38a/MAPK14	MBP	Q16539	MAPK14	82.2872	81.3424	81.8148	-0.289566
	RSK2	Glycogen Synthase-derived peptide	P51812	RPS6KA3	81.6559	81.6165	81.6362	-0.292719
	AMPK(A2/B2/G2)	SAMStide + 125 uM AMP	P54646/O43741/Q9UGJ0	PRKAA2	82.4697	80.0408	81.2552	-0.299467
	CHK1	CHKtide	O14757	CHEK1	82.1886	80.2175	81.203	-0.300394
	SGK2	Crosstide	Q9HBY8	SGK2	81.8853	80.3279	81.1066	-0.302108
	EIF2AK1/HRI	MBP	Q9BQI3	EIF2AK1	81.2485	80.7065	80.9775	-0.304407
	FES/FPS	pEY	P07332	FES	81.267	80.6234	80.9452	-0.304983
	STK16	MBP	O75716	STK16	81.5474	80.214	80.8807	-0.306133
	ARK5/NUAK1	CHKtide	O60285	NUAK1	81.1164	80.4779	80.7972	-0.307624
	AMPK(A2/B2/G1)	SAMStide + 125 uM AMP	P54646/O43741/P54619	PRKAA2	81.3221	80.1807	80.7514	-0.30844
	OSR1/OXSR1	CATCHtide	O95747	OXSR1	81.0914	80.3958	80.7436	-0.30858
	NEK1	MBP	Q96PY6	NEK1	81.9611	79.3842	80.6727	-0.309848
	MEKK2	MBP	Q9Y2U5	MAP3K2	81.1508	79.7701	80.4605	-0.313648
	ULK3	Casein	Q6PHR2	ULK3	82.0517	78.4928	80.2722	-0.317027
	LATS1	SGKtide	O95835	LATS1	79.7233	79.4258	79.5745	-0.329621
	BTK	pEY	Q06187	BTK	79.4952	78.9585	79.2268	-0.335939
	EEF2K	EEF2Ktide+Ca-CaM	O00418	EEF2K	79.9555	78.363	79.1592	-0.337171
	MLCK2/MYLK2	ZIPtide + Ca-CaM	Q9H1R3	MYLK2	80.3318	77.4465	78.8892	-0.342101
	DDR2	Axltide + Mn	Q16832	DDR2	78.7588	78.6712	78.715	-0.34529
	JAK1	pEY	P23458	JAK1	78.599	78.5893	78.5942	-0.347506
	PLK4/SAK	Casein	O00444	PLK4	78.9251	77.4945	78.2098	-0.354579
	PIM3	Pim2tide	Q86V86	PIM3	78.5738	77.4398	78.0068	-0.358329
	TGFBR2	MBP	P37173	TGFBR2	78.49	77.4164	77.9532	-0.35932
	LCK	pEY + Mn	P06239	LCK	78.1923	77.5529	77.8726	-0.360813
	LRRK2	LRRKtide	Q5S007	LRRK2	79.6889	75.8097	77.7493	-0.363098
	MLK1/MAP3K9	Casein	P80192	MAP3K9	76.9291	76.6815	76.8053	-0.380722
	LKB1	LKB1tide	Q15831	STK11	76.719	76.4894	76.6042	-0.384504
	ASK1/MAP3K5	MBP	Q99683	MAP3K5	77.4873	73.9485	75.7179	-0.401294
	CAMKK1	MBP + Ca-CaM	Q8N5S9	CAMKK1	76.8257	74.4246	75.6251	-0.403062
	HPK1/MAP4K1	MBP	Q92918	MAP4K1	75.624	75.603	75.6135	-0.403285
	PDGFRb	pEY + Mn	P09619	PDGFRB	76.7959	74.1397	75.4678	-0.406067
	LATS2	SGKtide	Q9NRM7	LATS2	75.7007	75.1785	75.4396	-0.406606
	MST3/STK24	MBP	Q9Y6E0	STK24	77.3872	72.3288	74.858	-0.417771
	NEK4	MBP	P51957	NEK4	74.8638	73.7976	74.3307	-0.42797
	ALK5/TGFBR1	Casein + Mn	P36897	TGFBR1	74.5095	74.1461	74.3278	-0.428027
	TTBK2	MBP	Q6IQ55	TTBK2	74.8011	73.7885	74.2948	-0.428667
	STK38L/NDR2	SGKtide	Q9Y2H1	STK38L	74.8091	73.4309	74.12	-0.432065
	PHKg1	ZIPtide	Q16816	PHKG1	74.0294	73.0124	73.5209	-0.443774
	PKCiota	PKCepsilon Peptide	P41743	PRKCI	77.0277	68.9666	72.9971	-0.454089
	PAK2	Long S6 Kinase substrate peptide	Q13177	PAK2	73.3591	71.3082	72.3336	-0.467261
	GRK2	Casein	P25098	GRK2	73.1024	70.2618	71.6821	-0.480315
	CDK9/cyclin K	PDKtide	P50750	CDK9	76.521	66.7928	71.6569	-0.480822
	WNK2	MBP	Q9Y3S1	WNK2	72.3573	70.6331	71.4952	-0.484081
	CHK2	CHKtide	O96017	CHEK2	71.0229	71.0045	71.0137	-0.49383
	NEK5	MBP	Q6P3R8	NEK5	73.2285	68.1859	70.7072	-0.500071
	TAOK3/JIK	MBP	Q9H2K8	TAOK3	70.6621	70.3879	70.525	-0.503793
	NEK3	MBP	Q8WUN5	NEK3	73.4885	66.4424	69.9654	-0.515286
	CK1g2	CK1tide	P78368	CSNK1G2	70.7282	68.9727	69.8504	-0.517659
	DMPK	Axltide	Q09013	DMPK	71.4778	67.1481	69.313	-0.528803
	VRK2	Casein + Mn	Q86Y07	VRK2	70.1847	68.0939	69.1393	-0.532422
	RSK1	Glycogen Synthase-derived peptide	Q15418	RPS6KA1	68.9776	68.9677	68.9727	-0.535903
	c-MER	pEY	Q12866	MERTK	69.3807	68.3942	68.8874	-0.537687
	MYO3B	MBP	Q8WXR4	MYO3B	69.7922	67.4719	68.6321	-0.543045
	TTBK1	MBP	Q5TCY1	TTBK1	67.5612	67.3349	67.4481	-0.568151
	BMPR2	MBP	Q13873	BMPR2	67.7959	63.7442	65.77	-0.604497
	BRK	pEY + Mn	Q13882	PTK6	65.456	63.7564	64.6062	-0.630255
	ZIPK/DAPK3	ZIPtide	O43293	DAPK3	69.8452	58.33	64.0876	-0.641883
	DMPK2/CDC42BPG	DAPK1tide	Q6DT37	CDC42BPG	65.3156	62.8316	64.0736	-0.642198
	PKN2/PRK2	Glycogen Synthase-derived peptide	Q16513	PKN2	65.1094	62.4248	63.7671	-0.649116
	STK25/YSK1	MBP	O00506	STK25	64.5318	62.9617	63.7468	-0.649576
	AMPK(A2/B2/G3)	SAMStide + 125 uM AMP	P54646/O43741/Q9UGI9	PRKAA2	64.0703	61.9723	63.0213	-0.666088
	WNK3	MBP	Q9BYP7	WNK3	64.7094	61.1315	62.9204	-0.6684
	CK1a1	CK1tide	P48729	CSNK1A1	63.3547	62.1041	62.7294	-0.672786
	WNK1	MBP	Q9H4A3	WNK1	62.7216	62.1728	62.4472	-0.679291
	RET	CHKtide	P07949	RET	61.9441	61.7982	61.8711	-0.692661
	PHKg2	ZIPtide	P15735	PHKG2	61.6768	60.4456	61.0612	-0.711672
	NEK7	MBP	Q8TDX7	NEK7	62.4659	59.6052	61.0356	-0.712278
	MEKK3	MBP	Q99759	MAP3K3	61.7842	59.2925	60.5383	-0.724079
	CK1g3	CK1tide	Q9Y6M4	CSNK1G3	60.8681	60.1677	60.5179	-0.724566
	PKG1b	Kemptide	P14619	PRKG1	58.5849	54.9664	56.7757	-0.816655
	RSK3	Glycogen Synthase-derived peptide	Q15349	RPS6KA2	56.6165	55.7708	56.1936	-0.831521
	PKCd	PKCe Pep + Lipid Activator	Q05655	PRKCD	56.3316	54.775	55.5533	-0.848056
	PAK3	ZIPtide	O75914	PAK3	56.7967	53.7575	55.2771	-0.855246
	p70S6K/RPS6KB1	S6K/Rsk2 peptide 2	P23443	RPS6KB1	54.2288	53.3759	53.8023	-0.89426
	Aurora A	Kemptide	O14965	AURKA	54.0682	51.5503	52.8093	-0.921137
	CK1a1	CK1tide	P48729	CSNK1A1	52.0096	51.9465	51.978	-0.944026
	CK1a1	CK1tide	P48729	CSNK1A1	47.858	47.2927	47.5753	-1.07171
	PKCnu/PRKD3	Glycogen Synthase-derived peptide	O94806	PRKD3	46.2186	46.1698	46.1942	-1.11422
	DAPK1	ZIPtide	P53355	DAPK1	46.812	44.1956	45.5038	-1.13594
	DYRK2	DYRKtide	Q92630	DYRK2	45.5574	45.1746	45.366	-1.14032
	PKCmu/PRKD1	Glycogen Synthase-derived peptide	Q15139	PRKD1	38.9602	37.6981	38.3291	-1.38349
	MST1/STK4	Axltide	Q13043	STK4	32.0136	31.4973	31.7555	-1.65492
	p70S6Kb/RPS6KB2	S6K/Rsk2 peptide 2	Q9UBS0	RPS6KB2	31.6014	29.6498	30.6256	-1.70719
	PASK	ZIPtide	Q96RG2	PASK	27.4085	27.1896	27.2991	-1.87308
	NIM1	CHKtide	Q8IY84	NIM1K	23.072	21.8523	22.4621	-2.15443
	PKN1/PRK1	Glycogen Synthase-derived peptide	Q16512	PKN1	10.8134	9.78473	10.2991	-3.27942

## Sheet: Screen DDX56
	Kinase Assay Name	General Kinase Substrate	Kinase Uniprot ID	Kinase Official Symbol	Data 1	Data 2	Mean Kinase Activity (%)	Log2 Fold Change		Kinase Profiling Screen with DDX56
	CK1d	CK1tide	P48730	CSNK1D	419.255	405.441	412.348	2.04386		DDX56 was tested in single dose duplicate mode at a concentration of 100 nM. Reactions were carried out at 50 μM ATP. CK1a1 and CK1epsilon were assayed 5 times. Data represent % kinase activity relative to buffer controls.
	CK1epsilon	CK1tide	P49674	CSNK1E	397.496	395.013	396.255	1.98643
	CK1epsilon	CK1tide	P49674	CSNK1E	370.516	360.453	365.484	1.86981
	CK1epsilon	CK1tide	P49674	CSNK1E	361.861	350.696	356.279	1.83301
	PKN2/PRK2	Glycogen Synthase-derived peptide	Q16513	PKN2	355.008	349.166	352.087	1.81593
	CK1epsilon	CK1tide	P49674	CSNK1E	343.971	336.644	340.308	1.76684
	CK1epsilon	CK1tide	P49674	CSNK1E	339.221	337.103	338.162	1.75771
	DAPK1	ZIPtide	P53355	DAPK1	266.403	258.361	262.382	1.39167
	PAK6	ZIPtide	Q9NQU5	PAK6	190.594	190.347	190.471	0.929568
	CDK2/cyclin O	Histone H1	P24941	CDK2	190.995	189.394	190.194	0.927474
	ULK2	MBP	Q8IYT8	ULK2	185.367	184.525	184.946	0.887106
	PKG2/PRKG2	Kemptide	Q13237	PRKG2	184.282	184.181	184.232	0.88152
	CK1a1	CK1tide	P48729	CSNK1A1	174.001	173.703	173.852	0.797858
	BRSK1	CHKtide	Q8TDC3	BRSK1	169.727	165.576	167.651	0.745464
	CK1a1	CK1tide	P48729	CSNK1A1	170.453	163.812	167.133	0.740993
	CK1a1	CK1tide	P48729	CSNK1A1	167.277	162.837	165.057	0.722965
	CK1a1	CK1tide	P48729	CSNK1A1	164.178	162.648	163.413	0.708522
	CK1a1	CK1tide	P48729	CSNK1A1	163.041	161.909	162.475	0.700218
	STK38/NDR1	Modified PKA Substrate	Q15208	STK38	156.151	154.32	155.235	0.634457
	EEF2K	EEF2Ktide+Ca-CaM	O00418	EEF2K	150.045	149.648	149.846	0.583483
	CK1g3	CK1tide	Q9Y6M4	CSNK1G3	146.644	145.431	146.037	0.546337
	CK1g2	CK1tide	P78368	CSNK1G2	142.812	141.943	142.377	0.509719
	MEK1	ERK(K52R)	Q02750	MAP2K1	144.226	140.45	142.338	0.50932
	MLCK2/MYLK2	ZIPtide + Ca-CaM	Q9H1R3	MYLK2	145.748	137.798	141.773	0.503583
	LCK	pEY + Mn	P06239	LCK	141.734	136.808	139.271	0.477894
	PHKg1	ZIPtide	Q16816	PHKG1	139.384	138.6	138.992	0.475003
	HPK1/MAP4K1	MBP	Q92918	MAP4K1	145.508	131.408	138.458	0.469447
	LCK2/ICK	MBP + Mn	Q9UPZ9	CILK1	139.59	135.203	137.397	0.458348
	PKCb2	Histone H1 + Lipid Activator	P05771	PRKCB	136.726	134.925	135.826	0.441756
	EIF2AK3/PERK	MBP	Q9NZJ5	EIF2AK3	134.382	132.716	133.549	0.41737
	CDK3/cyclin E	Histone H1	Q00526	CDK3	132.181	131.669	131.925	0.399721
	c-MET	MBP	P08581	MET	135.795	125.755	130.775	0.387085
	RSK3	Glycogen Synthase-derived peptide	Q15349	RPS6KA2	132.858	128.374	130.616	0.385334
	STK25/YSK1	MBP	O00506	STK25	129.623	126.888	128.255	0.359019
	MLK4	MEK1 (K97R)	Q5TCX8	MAP3K21	131.113	124.435	127.774	0.353592
	CK1g1	CK1tide	Q9HCP0	CSNK1G1	126.672	125.824	126.248	0.336259
	DAPK2	ZIPtide + Ca-CaM	Q9UIK4	DAPK2	126.223	125.695	125.959	0.332959
	PKCtheta	Histone H1 + Lipid Activator	Q04759	PRKCQ	126.278	124.688	125.483	0.327494
	MEK3	p38a (K53A)	P46734	MAP2K3	125.932	122.607	124.27	0.313473
	SIK3	AMARA peptide	Q9Y2K2	SIK3	123.921	123.015	123.468	0.304136
	CDK1/cyclin B	Histone H1	P06493	CDK1	121.726	120.478	121.102	0.276222
	CAMK1g	Autocamtide 2 + Ca-CaM	Q96NX5	CAMK1G	120.47	120.245	120.358	0.267327
	CDK4/cyclin D3	RB-CTF	P11802	CDK4	121.234	119.369	120.301	0.266651
	CDK2/cyclin A	Histone H1	P24941	CDK2	120.802	119.144	119.973	0.262713
	CDK2/cyclin E	Histone H1	P24941	CDK2	120.828	118.562	119.695	0.259362
	DYRK2	DYRKtide	Q92630	DYRK2	120.481	118.846	119.664	0.258986
	AMPK(A2/B1/G1)	SAMStide + 125 uM AMP	P54646/Q9Y478/P54619	PRKAA2	122.386	116.786	119.586	0.25805
	FMS	pEY + Mn	P07333	CSF1R	120.136	118.657	119.396	0.255756
	LRRK2	LRRKtide	Q5S007	LRRK2	119.566	118.691	119.129	0.252523
	DCAMKL2	Autocamtide 2 + Ca-CaM	Q8N568	DCLK2	119.264	116.207	117.735	0.235548
	SGK1	Crosstide	O00141	SGK1	119.143	115.585	117.364	0.23099
	c-MER	pEY	Q12866	MERTK	120.946	113.642	117.294	0.230128
	TLK2	Casein	Q86UE8	TLK2	117.081	116.158	116.619	0.221809
	TNIK	LRRKtide	Q9UKE5	TNIK	117.935	115.176	116.555	0.221013
	CAMK2b	Autocamtide 2 + Ca-CaM	Q13554	CAMK2B	117.132	115.972	116.552	0.22097
	AMPK(A2/B2/G3)	SAMStide + 125 uM AMP	P54646/O43741/Q9UGI9	PRKAA2	117.326	114.889	116.107	0.21546
	LKB1	LKB1tide	Q15831	STK11	117.811	114.391	116.101	0.215381
	CAMK4	ZIPtide + Ca-CaM*	Q16566	CAMK4	116.002	115.433	115.718	0.210609
	SRPK2	RS peptide	P78362	SRPK2	116.049	114.778	115.413	0.206812
	ARAF	MEK1 (K97R)	P10398	ARAF	115.981	114.66	115.321	0.205651
	CHK1	CHKtide	O14757	CHEK1	116.796	113.806	115.301	0.205403
	AMPK(A2/B2/G1)	SAMStide + 125 uM AMP	P54646/O43741/P54619	PRKAA2	115.313	114.734	115.024	0.201934
	DNA-PK	DNA-PKtide+ dsDNA	P78527	PRKDC	115.583	113.893	114.738	0.198345
	SRPK1	RS peptide	Q96SB4	SRPK1	115.611	113.79	114.701	0.197873
	MLCK/MYLK	ZIPtide + Ca-CaM	Q15746	MYLK	115.306	113.998	114.652	0.197263
	FGFR2	pEY + Mn	P21802	FGFR2	114.389	113.762	114.075	0.189984
	TSSK3/STK22C	CHKtide	Q96PN8	TSSK3	114.166	113.216	113.691	0.185115
	DYRK3	DYRKtide	O43781	DYRK3	112.815	112.099	112.457	0.16937
	COT1/MAP3K8	MEK1 (K97R)	P41279	MAP3K8	112.848	111.612	112.23	0.166461
	CAMK2d	ZIPtide + Ca-CaM*	Q13557	CAMK2D	112.956	111.143	112.049	0.164133
	PAK1	Long S6 Kinase substrate peptide	Q13153	PAK1	112.118	111.978	112.048	0.164112
	Haspin	Histone H3	Q8TF76	HASPIN	112.881	110.474	111.678	0.159342
	TAOK3/JIK	MBP	Q9H2K8	TAOK3	111.854	111.158	111.506	0.157119
	p70S6Kb/RPS6KB2	S6K/Rsk2 peptide 2	Q9UBS0	RPS6KB2	111.496	111.091	111.293	0.154365
	IRAK1	MBP	P51617	IRAK1	111.309	110.935	111.122	0.152149
	MKK6	p38a (K53A)	P52564	MAP2K6	111.623	110.604	111.113	0.15203
	JNK3	ATF2	P53779	MAPK10	111.692	110.355	111.023	0.150864
	BRSK2	ZIPtide	Q8IWQ3	BRSK2	111.368	110.577	110.972	0.150197
	AKT2	Crosstide	P31751	AKT2	111.429	110.39	110.91	0.149384
	DDR1	IRS1tide	Q08345	DDR1	111.762	109.735	110.749	0.147289
	PKN3/PRK3	SGKtide	Q6P5Z2	PKN3	110.921	110.528	110.725	0.146979
	TBK1	CK1tide	Q9UHD2	TBK1	110.497	110.448	110.472	0.143684
	BRK	pEY + Mn	Q13882	PTK6	110.519	110.296	110.407	0.142836
	PKCeta	PKCe Pep + Lipid Activator	P24723	PRKCH	111.867	108.788	110.327	0.14179
	LATS2	SGKtide	Q9NRM7	LATS2	112.928	107.579	110.253	0.140819
	PKAcg	Long S6 Kinase substrate peptide	P22612	PRKACG	111.507	108.13	109.819	0.135125
	c-Src	pEY	P12931	SRC	109.534	109.17	109.352	0.128979
	CAMK1a	Autocamtide 2 + Ca-CaM	Q14012	CAMK1	109.508	108.904	109.206	0.127054
	FAK/PTK2	pEY	Q05397	PTK2	110.417	107.562	108.989	0.124187
	ALK6/BMPR1B	Casein + Mn	O00238	BMPR1B	109.156	108.818	108.987	0.124156
	MAPKAPK5/PRAK	Glycogen Synthase-derived peptide	Q8IW41	MAPKAPK5	109.963	107.636	108.8	0.121674
	HIPK4	MBP	Q8NE63	HIPK4	108.72	108.049	108.385	0.11616
	p70S6K/RPS6KB1	S6K/Rsk2 peptide 2	P23443	RPS6KB1	108.451	108.289	108.37	0.115966
	RSK1	Glycogen Synthase-derived peptide	Q15418	RPS6KA1	108.385	107.694	108.04	0.111565
	PLK4/SAK	Casein	O00444	PLK4	108.285	107.728	108.006	0.111116
	DDR2	Axltide + Mn	Q16832	DDR2	110.202	105.696	107.949	0.110354
	FYN	pEY	P06241	FYN	110.226	105.395	107.81	0.108492
	AMPK(A1/B1/G1)	SAMStide + 125 uM AMP	Q13131/Q9Y478/P54619	PRKAA1	108.025	106.839	107.432	0.103422
	ERK5/MAPK7	MBP	Q13164	MAPK7	107.303	107.151	107.227	0.10067
	PDK3/PDHK3	MBP	Q15120	PDK3	107.43	106.835	107.132	0.0993946
	PIM2	Pim2tide	Q9P1W9	PIM2	109.001	104.877	106.939	0.0967849
	AMPK(A1/B1/G2)	SAMStide + 125 uM AMP	Q13131/Q9Y478/Q9UGJ0	PRKAA1	107.363	106.392	106.877	0.0959562
	MEK2	ERK(K52R)	P36507	MAP2K2	106.8	106.516	106.658	0.0929954
	MSK1/RPS6KA5	Crosstide	O75582	RPS6KA5	106.535	106.525	106.53	0.091254
	CAMK1d	Autocamtide 2 + Ca-CaM	Q8IU85	CAMK1D	106.91	106.057	106.484	0.0906324
	SYK	pEY	P43405	SYK	106.982	105.865	106.423	0.0898137
	EIF2AK2	RS peptide	P19525	EIF2AK2	107.239	105.412	106.326	0.0884914
	SIK1	AMARA peptide	P57059	SIK1	107.954	104.69	106.322	0.0884387
	PKA	PKA sub	P17612	PRKACA	106.565	106.053	106.309	0.0882679
	c-Kit	pEY + Mn	P10721	KIT	108.343	103.93	106.136	0.0859175
	CDK4/cyclin D1	RB-CTF	P11802	CDK4	106.13	106.009	106.07	0.0850139
	TLK1	Histone H3	Q9UKI8	TLK1	106.247	105.77	106.008	0.0841795
	CAMK2g	ZIPtide + Ca-CaM*	Q13555	CAMK2G	106.343	105.589	105.966	0.0835997
	TSSK2	CHKtide	Q96PF2	TSSK2	107.465	104.308	105.887	0.0825198
	Aurora C	Kemptide	Q9UQB9	AURKC	106.126	105.601	105.863	0.0822044
	MKK4	JNK(K55M)	P45985	MAP2K4	105.894	105.663	105.779	0.0810483
	IKKa/CHUK	IKKtide	O15111	CHUK	105.777	105.588	105.683	0.0797375
	FGR	pEY	P09769	FGR	105.859	105.212	105.535	0.0777283
	JNK1	ATF2	P45983	MAPK8	106.038	105.004	105.521	0.0775288
	PLK1	Casein	P53350	PLK1	105.799	105.136	105.467	0.0767964
	PDK1/PDPK1	PDKtide	O15530	PDPK1	106.421	104.488	105.455	0.0766259
	ALK3/BMPR1A	Casein + Mn	P36894	BMPR1A	105.593	105.109	105.351	0.0752021
	NEK9	MBP	Q8TD19	NEK9	105.64	105.033	105.337	0.0750067
	DRAK1/STK17A	ZIPtide	Q9UEE5	STK17A	105.591	104.897	105.244	0.0737376
	EIF2AK4/GCN2	RS peptide	Q9P2K8	EIF2AK4	106.418	103.962	105.19	0.0730021
	AMPK(A1/B2/G1)	SAMStide + 125 uM AMP	Q13131/O43741/P54619	PRKAA1	106.569	103.679	105.124	0.0720949
	PIM1	S6K/Rsk2 peptide 2	P11309	PIM1	106.423	103.236	104.83	0.068046
	STK32B/YANK2	MBP + Mn	Q9NY57	STK32B	105.385	104.265	104.825	0.0679805
	IKKe/IKBKE	Casein	Q14164	IKBKE	105.517	103.994	104.755	0.0670254
	CDK5/p25	Histone H1	Q00535	CDK5	105.526	103.828	104.677	0.0659474
	ACK1	Abltide	Q07912	TNK2	108.781	100.534	104.657	0.065671
	TRPM7/CHAK1	MBP + Mn	Q96QT4	TRPM7	105.15	104.125	104.638	0.0654004
	ERBB2/HER2	pEY + Mn	P04626	ERBB2	106.008	103.259	104.633	0.0653444
	CAMK1b	Autocamtide 2 + Ca-CaM	Q6P2M8	PNCK	104.816	104.428	104.622	0.0651875
	RSK2	Glycogen Synthase-derived peptide	P51812	RPS6KA3	106.131	103.078	104.604	0.0649425
	STK21/CIT	DAPK1	O14578	CIT	105.092	103.893	104.493	0.0634033
	CLK3	MBP	P49761	CLK3	104.315	104.213	104.264	0.0602375
	SLK/STK2	Histone H3	Q9H2G2	SLK	105.729	102.706	104.218	0.0595985
	PDK2/PDHK2	MBP	Q15119	PDK2	105.201	103.175	104.188	0.059195
	BRAF	MEK1 (K97R)	P15056	BRAF	104.203	104.056	104.13	0.0583792
	NEK5	MBP	Q6P3R8	NEK5	105.07	103.143	104.107	0.0580634
	PKD2/PRKD2	Glycogen Synthase-derived peptide	Q9BZL6	PRKD2	104.48	103.585	104.033	0.0570356
	MST1/STK4	Axltide	Q13043	STK4	105.763	102.287	104.025	0.056934
	EPHA7	pEY	Q15375	EPHA7	104.647	103.335	103.991	0.0564578
	GCK/MAP4K2	MBP	Q12851	MAP4K2	104.989	102.944	103.967	0.0561241
	PDK4/PDHK4	MBP	Q16654	PDK4	104.981	102.91	103.945	0.0558266
	RSK4	Long S6 Kinase substrate peptide	Q9UK32	RPS6KA6	104.362	103.498	103.93	0.0556115
	EGFR	pEY + Mn	P00533	EGFR	104.375	103.15	103.763	0.0532878
	ROCK2	Long S6 Kinase substrate peptide	O75116	ROCK2	104.362	102.769	103.565	0.0505433
	PKCg	Histone H1 + Lipid Activator	P05129	PRKCG	103.827	103.065	103.446	0.0488823
	LOK/STK10	Axltide	O94804	STK10	105.175	101.311	103.243	0.046049
	RAF1	MEK1 (K97R)	P04049	RAF1	103.656	102.63	103.143	0.0446476
	SGK2	Crosstide	Q9HBY8	SGK2	103.324	102.759	103.041	0.0432219
	TYK2	Axltide	P29597	TYK2	103.083	102.8	102.941	0.0418233
	AXL	Abltide + Mn	P30530	AXL	103.212	102.653	102.932	0.0416939
	STK38L/NDR2	SGKtide	Q9Y2H1	STK38L	102.93	102.888	102.909	0.0413698
	VRK1	Casein	Q99986	VRK1	104.217	101.503	102.86	0.0406839
	SIK2	AMARA peptide	Q9H0K1	SIK2	103.237	102.457	102.847	0.0405023
	ULK3	Casein	Q6PHR2	ULK3	103.177	102.261	102.719	0.0387042
	STK39/STLK3	CATCHtide	Q9UEW8	STK39	103.768	101.32	102.544	0.0362399
	CK2a2	CK2 sub	P19784	CSNK2A2	103.302	101.704	102.503	0.0356662
	MRCKb/CDC42BPB	Long S6 Kinase substrate peptide	Q9Y5S2	CDC42BPB	102.735	101.931	102.333	0.0332706
	ABL1	Abltide	P00519	ABL1	102.991	101.356	102.174	0.0310275
	MAPKAPK3	Glycogen Synthase-derived peptide	Q16644	MAPKAPK3	103.027	101.254	102.141	0.0305558
	HGK/MAP4K4	MBP	O95819	MAP4K4	102.365	101.891	102.128	0.030376
	HCK	Src Substrate peptide	P08631	HCK	102.217	101.847	102.032	0.0290186
	JAK3	JAK3tide	P52333	JAK3	101.92	101.74	101.83	0.0261623
	ALK1/ACVRL1	Casein + Mn	P37023	ACVRL1	103.077	100.336	101.706	0.0244076
	PKCa	Histone H1 + Lipid Activator	P17252	PRKCA	101.687	101.67	101.678	0.0240088
	CHK2	CHKtide	O96017	CHEK2	102.068	101.135	101.601	0.022916
	mTOR/FRAP1	4EBP1 + Mn	P42345	MTOR	103.188	100.013	101.6	0.0229058
	CDC7/DBF4	PDKtide	O00311	CDC7	101.943	100.912	101.427	0.0204475
	DMPK	Axltide	Q09013	DMPK	102.027	100.696	101.361	0.0195065
	MRCKa/CDC42BPA	Long S6 Kinase substrate peptide	Q5VT25	CDC42BPA	101.272	101.001	101.136	0.0163034
	TRKC	pEY	Q16288	NTRK3	101.377	100.824	101.1	0.0157864
	BMX/ETK	pEY	P51813	BMX	101.619	100.547	101.083	0.0155409
	GRK2	Casein	P25098	GRK2	104.924	97.142	101.033	0.014829
	DCAMKL1	Autocamtide 2 + Ca-CaM	O15075	DCLK1	102.114	99.9346	101.024	0.0147018
	LIMK2	Cofilin 2 + Mn	P53671	LIMK2	101.371	100.547	100.959	0.013771
	MKK7	JNK (K55M)	O14733	MAP2K7	102.515	99.2022	100.859	0.0123366
	WNK1	MBP	Q9H4A3	WNK1	105.848	95.6806	100.764	0.010985
	IRR/INSRR	Axltide	P14616	INSRR	104.737	96.7439	100.74	0.0106394
	IKKb/IKBKB	IKKtide	O14920	IKBKB	101.387	99.9687	100.678	0.00974623
	MYLK3	ZIPtide + Ca-CaM	Q32MK0	MYLK3	100.665	100.595	100.63	0.00905913
	NEK6	MBP	Q9HC98	NEK6	101.709	99.4419	100.576	0.00828032
	MLK1/MAP3K9	Casein	P80192	MAP3K9	100.732	100.027	100.38	0.00547094
	OSR1/OXSR1	CATCHtide	O95747	OXSR1	100.423	100.314	100.368	0.00530649
	CDK1/cyclin A	Histone H1	P06493	CDK1	101.251	99.453	100.352	0.00506987
	MAPKAPK2	Glycogen Synthase-derived peptide	P49137	MAPKAPK2	100.042	100.016	100.029	0.00042328
	AKT3	Crosstide	Q9Y243	AKT3	100.933	99.016	99.9743	-0.000370251
	NEK3	MBP	Q8WUN5	NEK3	102.204	97.6094	99.9068	-0.00134548
	LIMK1	Cofilin 1	P53667	LIMK1	100.095	99.6209	99.8582	-0.00204726
	MLK3/MAP3K11	MBP	Q16584	MAP3K11	100.302	99.3435	99.8229	-0.00255781
	CDK6/cyclin D1	RB-CTF	Q00534	CDK6	100.94	98.2311	99.5853	-0.00599481
	PAK5	ZIPtide	Q9P286	PAK5	99.9339	99.213	99.5735	-0.00616646
	PKG1b	Kemptide	P14619	PRKG1	99.9419	99.0292	99.4855	-0.00744129
	ALK5/TGFBR1	Casein + Mn	P36897	TGFBR1	99.9265	98.7491	99.3378	-0.00958477
	PKCb1	Histone H1 + Lipid Activator	P05771	PRKCB	100.308	98.2297	99.2689	-0.0105858
	FGFR1	pEY + Mn	P11362	FGFR1	99.4376	98.857	99.1473	-0.0123541
	ROCK1	Long S6 Kinase substrate peptide	Q13464	ROCK1	99.0624	98.3333	98.6979	-0.0189091
	FLT1/VEGFR1	pEY + Mn	P17948	FLT1	99.9683	97.2299	98.5991	-0.0203532
	TAK1	Casein	O43318	MAP3K7	100.667	96.4622	98.5646	-0.0208589
	FLT3	Abltide	P36888	FLT3	99.132	97.9606	98.5463	-0.0211261
	FGFR4	pEY + Mn	P22455	FGFR4	100.333	96.6754	98.5041	-0.021745
	PIM3	Pim2tide	Q86V86	PIM3	99.2233	97.5187	98.371	-0.0236947
	AKT1	Crosstide	P31749	AKT1	98.3443	98.0548	98.1995	-0.0262117
	ALK4/ACVR1B	Casein + Mn	P36896	ACVR1B	98.738	97.2882	98.0131	-0.0289536
	PDK1/PDHK1	MBP	Q15118	PDK1	98.8394	97.119	97.9792	-0.0294523
	SGK3/SGKL	Crosstide	Q96BR1	SGK3	99.9047	96.0086	97.9567	-0.0297843
	TESK1	Cofilin 2 + Mn	Q15569	TESK1	98.2408	97.5659	97.9034	-0.0305696
	RON/MST1R	Axltide + Mn	Q04912	MST1R	97.9983	97.6329	97.8156	-0.0318636
	MST2/STK3	MBP	Q13188	STK3	98.4334	97.1177	97.7755	-0.0324546
	LATS1	SGKtide	O95835	LATS1	97.463	97.4366	97.4498	-0.0372684
	Aurora B	Kemptide	Q96GD4	AURKB	98.2218	96.5174	97.3696	-0.0384566
	LYN B	pEY+ Mn	P07948	LYN	98.627	96.0481	97.3375	-0.0389319
	LYN	pEY	P07948	LYN	97.5988	96.9593	97.2791	-0.0397984
	PAK3	ZIPtide	O75914	PAK3	98.6557	95.5771	97.1164	-0.0422128
	JNK2	ATF2	P45984	MAPK9	97.6473	96.4877	97.0675	-0.0429402
	PBK/TOPK	MBP	Q96KB5	PBK	97.4858	96.5982	97.042	-0.043319
	CDK5/p35	Histone H1	Q00535	CDK5	97.5295	96.5089	97.0192	-0.0436577
	AMPK(A1/B1/G3)	SAMStide + 125 uM AMP	Q13131/Q9Y478/Q9UGI9	PRKAA1	98.7961	94.8852	96.8407	-0.0463152
	ZAK/MLTK	MBP	Q9NYL2	MAP3K20	97.5567	96.0853	96.821	-0.0466078
	GSK3a	Phospho-Glycogen Synthase peptide	P49840	GSK3A	97.2982	96.343	96.8206	-0.0466141
	ERK7/MAPK15	MBP	Q8TD08	MAPK15	96.9348	96.6355	96.7851	-0.0471427
	IR	pEY + Mn	P06213	INSR	96.9089	96.5265	96.7177	-0.0481483
	JAK1	pEY	P23458	JAK1	97.8658	94.9407	96.4032	-0.0528465
	MST4	MBP	Q9P289	STK26	97.8046	94.8311	96.3179	-0.0541244
	CAMKK2	MBP + Ca-CaM	Q96RR4	CAMKK2	97.0766	95.523	96.2998	-0.0543954
	ULK1	MBP	O75385	ULK1	97.2965	94.8154	96.056	-0.058053
	PHKg2	ZIPtide	P15735	PHKG2	96.0066	95.8994	95.953	-0.0596
	TXK	Abltide	P42681	TXK	95.8762	95.623	95.7496	-0.0626618
	PKCmu/PRKD1	Glycogen Synthase-derived peptide	Q15139	PRKD1	96.0209	95.4257	95.7233	-0.0630585
	MSK2/RPS6KA4	Crosstide	O75676	RPS6KA4	97.6171	93.8007	95.7089	-0.063275
	EPHA1	pEY + Mn	P21709	EPHA1	96.3028	94.5363	95.4195	-0.0676435
	PKCiota	PKCepsilon Peptide	P41743	PRKCI	97.1533	93.5825	95.3679	-0.0684244
	EPHB1	pEY	P54762	EPHB1	95.4771	95.2582	95.3677	-0.0684275
	DYRK1B	DYRKtide	Q9Y463	DYRK1B	95.5178	95.2143	95.366	-0.0684526
	CDK6/cyclin D3	RB-CTF	Q00534	CDK6	97.4105	93.313	95.3618	-0.0685174
	RIPK3	MBP	Q9Y572	RIPK3	96.3267	94.3055	95.3161	-0.0692086
	EPHA8	pEY	P29322	EPHA8	95.535	94.4589	94.997	-0.0740468
	PEAK1	pEY	Q9H792	PEAK1	96.2052	93.5324	94.8688	-0.0759939
	EPHA2	pEY	P29317	EPHA2	95.2141	94.5188	94.8665	-0.0760298
	DLK/MAP3K12	MBP	Q12852	MAP3K12	95.0629	94.5959	94.8294	-0.0765938
	MARK4	CHKtide	Q96L34	MARK4	95.2159	94.4301	94.823	-0.0766917
	DYRK1/DYRK1A	DYRKtide	Q13627	DYRK1A	95.2042	94.2285	94.7163	-0.0783147
	GRK1	Casein	Q15835	GRK1	94.8386	94.3385	94.5886	-0.0802622
	DMPK2/CDC42BPG	DAPK1tide	Q6DT37	CDC42BPG	95.0864	93.7944	94.4404	-0.0825239
	DYRK4	DYRKtide	Q9NR20	DYRK4	94.7707	94.0508	94.4107	-0.082977
	CDK2/cyclin A1	Histone H1	P24941	CDK2	94.5675	93.8854	94.2264	-0.0857967
	CAMK2a	Autocamtide 2 + Ca-CaM	Q9UQM7	CAMK2A	94.9533	93.3973	94.1753	-0.08658
	YES/YES1	pEY	P07947	YES1	96.6504	91.606	94.1282	-0.0873016
	ZAP70	pEY	P43403	ZAP70	94.3989	93.5809	93.9899	-0.0894222
	CDK9/cyclin K	PDKtide	P50750	CDK9	94.4723	93.2146	93.8435	-0.091672
	PYK2	pEY + Mn	Q14289	PTK2B	94.6871	92.5313	93.6092	-0.095278
	PAK2	Long S6 Kinase substrate peptide	Q13177	PAK2	94.358	92.6717	93.5148	-0.096733
	P38a/MAPK14	MBP	Q16539	MAPK14	93.6519	93.3504	93.5012	-0.0969438
	STK22D/TSSK1	CHKtide	Q9BXA7	TSSK1B	93.2199	92.8948	93.0573	-0.103808
	CTK/MATK	pEY	P42679	MATK	93.2006	92.8653	93.033	-0.104186
	ALK	pEY	Q9UM73	ALK	93.4683	92.4068	92.9375	-0.105667
	TTBK1	MBP	Q5TCY1	TTBK1	93.396	92.3672	92.8816	-0.106535
	ABL2/ARG	Abltide	P42684	ABL2	93.0343	92.263	92.6486	-0.110158
	NEK1	MBP	Q96PY6	NEK1	93.0849	91.9927	92.5388	-0.11187
	CDK9/cyclin T1	PDKtide	P50750	CDK9	94.549	90.2871	92.418	-0.113754
	KDR/VEGFR2	pEY + Mn	P35968	KDR	92.9239	91.2805	92.1022	-0.118693
	AMPK(A2/B2/G2)	SAMStide + 125 uM AMP	P54646/O43741/Q9UGJ0	PRKAA2	92.841	91.1273	91.9841	-0.120543
	CDK7/cyclin H	Histone H1	P50613	CDK7	92.0257	91.8693	91.9475	-0.121118
	IGF1R	pEY + Mn	P08069	IGF1R	92.3735	91.153	91.7633	-0.124012
	PKCzeta	PKCepsilon Peptide	Q05513	PRKCZ	91.7432	91.6948	91.719	-0.124707
	EPHB3	pEY	P54753	EPHB3	92.6938	90.639	91.6664	-0.125536
	EIF2AK1/HRI	MBP	Q9BQI3	EIF2AK1	91.8633	91.3108	91.5871	-0.126784
	CSK	pEY	P41240	CSK	91.9932	91.0915	91.5423	-0.127489
	TRKB	pEY + Mn	Q16620	NTRK2	92.0501	90.5191	91.2846	-0.131556
	PKCnu/PRKD3	Glycogen Synthase-derived peptide	O94806	PRKD3	91.0153	90.9915	91.0034	-0.136008
	CDK1/cyclin E	RB Protein	P06493	CDK1	91.2927	90.7094	91.0011	-0.136044
	ERK2/MAPK1	MBP	P28482	MAPK1	91.2371	90.7442	90.9906	-0.13621
	EPHB4	pEY	P54760	EPHB4	92.6146	89.194	90.9043	-0.137579
	PDGFRa	pEY + Mn	Q9DE49	PDGFRA	91.7888	89.7162	90.7525	-0.139991
	ITK	MBP	Q08881	ITK	90.8405	89.9644	90.4025	-0.145566
	CAMKK1	MBP + Ca-CaM	Q8N5S9	CAMKK1	90.308	90.2992	90.3036	-0.147145
	MINK/MINK1	MBP	Q8N4C8	MINK1	90.1139	90.043	90.0785	-0.150745
	RIPK5	MBP	Q6XUX3	DSTYK	90.0851	89.9225	90.0038	-0.151942
	TYRO3/SKY	pEY + Mn	Q06418	TYRO3	89.8427	88.644	89.2434	-0.164183
	PLK3	Casein	Q9H4B4	PLK3	91.0051	87.4288	89.2169	-0.16461
	EPHA4	pEY + Mn	P54764	EPHA4	90.2082	87.9844	89.0963	-0.166563
	NEK4	MBP	P51957	NEK4	89.2566	88.3543	88.8054	-0.17128
	CDK18/cyclin Y (PCTK3)	RB Protein	Q07002	CDK18	88.809	88.5985	88.7038	-0.172933
	MARK2/PAR-1Ba	CHKtide	Q7KZI7	MARK2	88.658	88.322	88.49	-0.176413
	JAK2	pEY	O60674	JAK2	89.4963	87.309	88.4026	-0.177839
	SNARK/NUAK2	MBP	Q9H093	NUAK2	89.0102	87.4456	88.2279	-0.180693
	ERBB4/HER4	pEY + Mn	Q15303	ERBB4	88.5281	87.116	87.822	-0.187345
	CLK1	MBP	P49759	CLK1	88.4343	87.0429	87.7386	-0.188716
	PKCepsilon	S25 PKC Peptide	Q02156	PRKCE	87.9105	86.7818	87.3462	-0.195184
	MARK3	CHKtide	P27448	MARK3	89.2447	85.3328	87.2888	-0.196132
	MEKK1	MBP	Q13233	MAP3K1	88.6169	85.4911	87.054	-0.200017
	MEKK2	MBP	Q9Y2U5	MAP3K2	86.8847	86.764	86.8243	-0.203828
	MELK	ZIPtide	Q14680	MELK	86.3587	86.2311	86.2949	-0.212652
	GLK/MAP4K3	MBP	Q8IVH8	MAP4K3	88.1199	83.6943	85.9071	-0.219151
	TYK1/LTK	Abltide	P29376	LTK	86.8612	84.9102	85.8857	-0.21951
	TAOK1	MBP	Q7L7X3	TAOK1	86.6306	84.8951	85.7629	-0.221575
	MST3/STK24	MBP	Q9Y6E0	STK24	86.3549	85.1041	85.7295	-0.222137
	MNK2	MBP	Q9HBH9	MKNK2	86.3281	84.9625	85.6453	-0.223554
	ASK1/MAP3K5	MBP	Q99683	MAP3K5	87.2918	83.8114	85.5516	-0.225133
	NEK7	MBP	Q8TDX7	NEK7	85.9288	84.8657	85.3972	-0.227739
	PKAcb	Long S6 Kinase substrate peptide	P22694	PRKACB	85.5163	84.9773	85.2468	-0.230282
	WEE1	MBP	P30291	WEE1	88.023	82.2159	85.1195	-0.232439
	MARK1	CHKtide	Q9P0L2	MARK1	87.3381	82.7609	85.0495	-0.233625
	CDK16/cyclin Y (PCTAIRE)	RB Protein	Q00536	CDK16	86.1124	83.6293	84.8709	-0.236659
	CLK2	MBP	P49760	CLK2	85.0842	84.6024	84.8433	-0.237128
	ERK1/MAPK3	MBP	P27361	MAPK3	86.9867	81.8661	84.4264	-0.244234
	GSK3b	Phospho-Glycogen Synthase peptide	P49841	GSK3B	84.3003	83.8499	84.0751	-0.25025
	EPHA5	pEY + Mn	P54756	EPHA5	84.3834	83.7404	84.0619	-0.250476
	FGFR3	pEY + Mn	P22607	FGFR3	84.5487	83.0815	83.8151	-0.254718
	STK33	MBP	Q9BYT3	STK33	84.5382	82.7693	83.6538	-0.257498
	PDGFRb	pEY + Mn	P09619	PDGFRB	85.3346	81.8109	83.5727	-0.258896
	ALK2/ACVR1	Casein + Mn	Q04771	ACVR1	85.186	81.5741	83.3801	-0.262225
	TNK1	pEY	Q13470	TNK1	84.0619	82.1981	83.13	-0.266558
	NIM1	CHKtide	Q8IY84	NIM1K	84.1449	81.6484	82.8966	-0.270614
	CDK14/cyclin Y (PFTK1)	RB Protein	O94921	CDK14	82.9941	81.0991	82.0466	-0.285485
	TRKA	pEY + Mn	P04629	NTRK1	83.1582	80.5605	81.8594	-0.288781
	EPHB2	pEY + Mn	P29323	EPHB2	81.8467	81.6815	81.7641	-0.290461
	TEC	pEY + Mn	P42680	TEC	83.1164	80.2429	81.6797	-0.291951
	FRK/PTK5	pEY + Mn	P42685	FRK	82.6722	80.3169	81.4945	-0.295225
	PASK	ZIPtide	Q96RG2	PASK	81.5251	80.9671	81.2461	-0.299629
	RIPK2	MBP	O43353	RIPK2	82.3979	79.982	81.19	-0.300626
	WNK2	MBP	Q9Y3S1	WNK2	85.4589	76.803	81.1309	-0.301676
	BLK	pEY	P51451	BLK	82.5852	79.1494	80.8673	-0.306371
	GRK7	Casein	Q8WTQ7	GRK7	82.716	78.9946	80.8553	-0.306586
	STK32C/YANK3	MBP + Mn	Q86UX6	STK32C	81.4283	79.4308	80.4296	-0.314202
	KHS/MAP4K5	MBP	Q9Y4K4	MAP4K5	81.057	79.3915	80.2242	-0.31789
	FER	pEY	P16591	FER	79.9928	79.4236	79.7082	-0.3272
	SSTK/TSSK6	MBP	Q9BXA6	TSSK6	81.3961	77.0898	79.243	-0.335645
	HIPK2	MBP	Q9H2X6	HIPK2	79.214	78.7119	78.9629	-0.340753
	RET	CHKtide	P07949	RET	79.455	78.3425	78.8988	-0.341926
	MLK2/MAP3K10	MBP	Q02779	MAP3K10	78.5198	77.8472	78.1835	-0.355064
	ARK5/NUAK1	CHKtide	O60285	NUAK1	79.0826	75.8612	77.4719	-0.368255
	TAOK2	MBP	Q9UL54	TAOK2	78.5887	74.7651	76.6769	-0.383136
	P38b/MAPK11	MBP	Q15759	MAPK11	78.8213	73.9515	76.3864	-0.388612
	NEK11	MBP	Q8NG66	NEK11	78.1188	74.1298	76.1243	-0.393571
	P38d/MAPK13	MBP	O15264	MAPK13	75.8721	75.1142	75.4932	-0.405582
	STK16	MBP	O75716	STK16	76.4293	73.9099	75.1696	-0.411779
	MNK1	MBP	Q9BUB5	MKNK1	77.8732	72.3578	75.1155	-0.412817
	PRKX	Kemptide	P51817	PRKX	76.493	73.2827	74.8879	-0.417196
	IRAK4	MBP	Q9NWZ3	IRAK4	75.3477	73.0797	74.2137	-0.430242
	MUSK	MBP	O15146	MUSK	76.5345	71.6905	74.1125	-0.432211
	CLK4	MBP	Q9HAZ1	CLK4	74.5615	72.6664	73.614	-0.441948
	CK2a	CK2 sub	P68400	CSNK2A1	73.5395	73.3077	73.4236	-0.445684
	NLK	MBP	Q9UBE8	NLK	73.6546	73.0045	73.3295	-0.447533
	EPHA3	pEY + Mn	P29320	EPHA3	73.2996	72.9751	73.1373	-0.45132
	SRMS	pEY + Mn	Q9H3Y6	SRMS	72.6967	72.5572	72.627	-0.461423
	HIPK3	MBP	Q9H422	HIPK3	72.8429	71.9326	72.3877	-0.466183
	MSSK1/STK23	RS peptide	Q9UPE1	SRPK3	71.9461	71.8743	71.9102	-0.475732
	TTBK2	MBP	Q6IQ55	TTBK2	71.9582	71.8571	71.9076	-0.475783
	ZIPK/DAPK3	ZIPtide	O43293	DAPK3	73.145	68.6179	70.8815	-0.49652
	FLT4/VEGFR3	pEY + Mn	P35916	FLT4	72.4514	69.0718	70.7616	-0.498962
	PAK4	MBP	O96013	PAK4	69.3758	68.9878	69.1818	-0.531536
	P38g/MAPK12	MBP	P53778	MAPK12	69.4784	68.6965	69.0874	-0.533505
	MYO3B	MBP	Q8WXR4	MYO3B	69.8046	68.017	68.9108	-0.537198
	Aurora A	Kemptide	O14965	AURKA	70.3189	65.4936	67.9063	-0.558383
	HIPK1	MBP	Q86Z02	HIPK1	67.3508	66.4006	66.8757	-0.580446
	TGFBR2	MBP	P37173	TGFBR2	67.6678	63.3993	65.5335	-0.609694
	WNK3	MBP	Q9BYP7	WNK3	65.8367	61.0669	63.4518	-0.656267
	PKN1/PRK1	Glycogen Synthase-derived peptide	Q16512	PKN1	64.7591	60.7574	62.7583	-0.672122
	PKG1a	Kemptide	Q13976	PRKG1	62.5137	61.2286	61.8712	-0.692661
	MEKK3	MBP	Q99759	MAP3K3	65.1808	57.6526	61.4167	-0.703297
	NEK2	MBP	P51955	NEK2	58.6035	58.3213	58.4624	-0.774419
	GRK4	Casein	P32298	GRK4	53.3895	53.2085	53.299	-0.90782
	VRK2	Casein + Mn	Q86Y07	VRK2	54.5201	49.9502	52.2351	-0.936907
	PKCd	PKCe Pep + Lipid Activator	Q05655	PRKCD	51.1571	48.9433	50.0502	-0.998553
	ROS/ROS1	IGF-1Rtide	P08922	ROS1	49.1901	49.1292	49.1596	-1.02445
	BTK	pEY	Q06187	BTK	48.4784	46.6863	47.5823	-1.0715
	GRK5	Casein	P34947	GRK5	47.5834	47.1792	47.3813	-1.07761
	BMPR2	MBP	Q13873	BMPR2	46.3795	44.0837	45.2316	-1.1446
	FES/FPS	pEY	P07332	FES	43.9241	42.8341	43.3791	-1.20493
	PLK2	Casein	Q9NYY3	PLK2	38.5865	37.5192	38.0528	-1.39392
	GRK3	Casein	P35626	GRK3	35.168	33.964	34.566	-1.53257
	GRK6	Casein	P43250	GRK6	29.5245	28.9928	29.2586	-1.77307
	EPHA6	pEY	Q9UF33	EPHA6	22.189	20.3773	21.2832	-2.23221
	TIE2/TEK	pEY + Mn	Q02763	TEK	17.0714	15.1401	16.1058	-2.63435

## Sheet: Kinome Screen Hits
	44 protein kinases activated by one or more DDX proteins with log2 fold change above 0.5
	BRSK1
	CAMK2B
	CAMKK2
	CDK1
	CDK2
	CSNK1A1
	CSNK1D
	CSNK1E
	CSNK1G2
	CSNK1G3
	CSNK2A1
	CSNK2A2
	DAPK1
	DYRK2
	DYRK4
	EEF2K
	FLT3
	IKBKE
	MAP2K1
	MARK1
	MARK2
	MARK3
	MATK
	MET
	MYLK2
	NEK5
	NEK6
	PAK6
	PDK1
	PKN2
	PLK2
	PRKCI
	PRKD2
	PRKG1
	PRKG2
	RPS6KA6
	SIK2
	SRPK1
	STK38
	TESK1
	TNIK
	TSSK1B
	ULK1
	ULK2
