# Supplementary material for: DEAD box RNA helicases are pervasive protein kinase interactors and activators
Source: HighWire-hosted journal article supplement (doi:10.1101/gr.278264.123), 2024-06-01
Supplement: Supplemental_Table_S10_.xlsx [file Supplemental_Table_S10_.xlsx]

## Sheet: Description
	Enzyme kinetics parameters of MARK1 protein kinase in presence and absence of DDX proteins

## Sheet: Substrate inhibition 
	Substrate inhibition parameters for MARK1T208E ATP concentration: 100 µM					GraphPad Prism v9.4: Non-linear fit to Michaelis-Menten equation Best-fit values ± Std. error (SEM)
		Km [Peptide substrate] (µM)	Vmax (nmol/min/µg)	Ki (mM)
	Buffer	34.0 ± 5.2	2.5 ± 0.1	4.1 ± 1.0
	DDX3X	24.3 ± 1.1	7.2 ± 01.	4.2 ± 0.3
	DDX5	24.0 ± 3.3	6.0 ± 0.3	3.8 ± 0.8
	DDX27	38.2 ± 8.1	6.0 ± 0.4	5.1 ± 2.0
	DDX56	18.9 ± 1.3	6.8 ± 0.1	6.1 ± 0.9

## Sheet: Michaelis Menten ATP
	Michaelis-Menten parameters for MARK1T208E Peptide substrate concentration: 100 µM				GraphPad Prism v9.4: Non-linear fit to Michaelis-Menten equation Best-fit values ± Std. error (SEM)
		Km ATP (µM)	Vmax (nmol/min/µg)
	Buffer	21.66 ± 4.6	2.9 ± 0.1
	DDX3X	14.4 ± 1.4	6.0 ± 0.1
	DDX5	13.6 ± 1.6	5.3 ± 0.1
	DDX27	17.5 ± 1.2	5.8 ± 0.1
	DDX56	18.0 ± 2.0	7.1 ± 0.2

## Sheet: EC50 DDX proteins 
	Dose response - Stimulation Peptide substrate / ATP concentration: 500 / 100 µM				GraphPad Prism v9.4:
		EC50 (nM)	Hill Coefficient (nH)		Non-linear fit to Log10[Agonist] vs. normalized response -- Variable slope equation
	DDX3X	60.0 [26.0 , 112.9]	1.4 [0.5 , ?]		Best value & [95 % Confidence Intervall]
	DDX5	95.2 [67.0 , 128.55	2.2 [1.2 , ?]
	DDX27	328.2 [190.2 , 595.3]	1.0 [0.6 , 1.8]
	DDX56	110.4 [84.6 , 142.0]	1.2 [0.9 , 1.6]
	GFP	> 106	n.c.
	BSA	> 106	n.c.
	g-Glob.	> 106	n.c.
			n.c. : not calculated
